# Supplementary material for: Aging and sarcopenia associate with specific interactions between gut microbes, serum biomarkers and host physiology in rats
Source: Aging (Albany NY). 2017 Jul 17;9(7):1698–714. doi: 10.18632/aging.101262 (PMC5559170; doi:10.18632/aging.101262)
Supplement: Supplementary file 2 [file aging-09-1698-s002.xlsx]

## Sheet: final.an.unique_list.shared
AGE	Group	numOtus	Sum	Otu0001	Otu0002	Otu0003	Otu0004	Otu0005	Otu0006	Otu0007	Otu0008	Otu0009	Otu0010	Otu0011	Otu0012	Otu0013	Otu0014	Otu0015	Otu0016	Otu0017	Otu0018	Otu0019	Otu0020	Otu0021	Otu0022	Otu0023	Otu0024	Otu0025	Otu0026	Otu0027	Otu0028	Otu0029	Otu0030	Otu0031	Otu0032	Otu0033	Otu0034	Otu0035	Otu0036	Otu0037	Otu0038	Otu0039	Otu0040	Otu0041	Otu0042	Otu0043	Otu0044	Otu0045	Otu0046
A8	sample_1	1184	150803	7616	1420	4900	1669	1483	470	5076	893	613	206	565	486	5919	683	178	319	10129	79	879	498	478	139	425	536	97	62	201	852	1272	233	507	63	1360	95	15	248	556	238	93	30	286	98	726	936	963	245
A8	sample_10	1184	95770	598	442	4111	1269	987	228	1137	1133	117	1075	625	269	645	377	192	661	5136	582	577	195	516	1250	92	80	260	45	207	83	217	144	266	220	306	78	684	12	173	170	277	84	145	180	326	1130	331	36
A8	sample_2	1184	122474	7188	1037	931	3528	2642	887	1970	707	153	409	1318	996	1058	699	105	1035	7814	140	1735	468	296	315	296	239	274	195	82	826	3942	479	317	9	306	140	33	24	397	318	342	267	435	858	441	1563	417	606
A8	sample_3	1184	78760	2584	680	3293	527	1116	564	1483	255	329	397	1943	960	291	644	176	350	3949	114	1027	74	165	483	119	65	97	77	138	189	529	248	258	113	8	119	121	5	141	199	157	112	491	178	1396	492	195	29
A8	sample_4	1184	146753	3995	1752	2157	1501	3552	1220	2137	1854	548	1767	2106	1778	319	903	465	272	6165	346	1574	414	741	1126	226	218	272	163	86	556	1792	275	1564	203	166	199	473	2113	732	451	251	365	731	455	262	946	244	47
A8	sample_5	1184	135160	3003	702	11492	1407	805	341	808	768	79	342	2567	496	5708	853	569	470	3130	116	1153	426	925	258	1151	97	167	90	124	131	1579	298	847	119	3436	123	34	52	184	71	203	116	194	147	90	373	243	160
A8	sample_6	1184	174060	10214	1323	184	2273	604	531	1987	1083	700	497	895	623	12304	1856	418	189	10415	479	2049	1498	195	565	120	345	341	129	152	770	646	374	671	338	620	158	422	17	80	354	219	40	617	167	355	1603	299	2138
A8	sample_7	1184	164746	6700	1543	1541	2330	4521	1442	1525	1434	684	1267	2073	1310	3359	1351	905	522	6748	417	1932	1037	1444	448	468	72	174	782	145	315	4492	943	594	49	1254	384	82	13	939	132	650	58	879	550	195	1638	968	431
A8	sample_8	1184	169383	1880	1711	4825	3115	3949	2039	4661	5237	765	297	438	1449	2305	799	1128	1073	9544	214	946	613	398	544	685	413	104	257	114	236	7530	540	801	40	230	211	202	5	70	473	401	150	789	298	2916	1211	948	206
A8	sample_9	1184	117096	2746	946	1070	3627	1865	546	3133	1030	628	237	439	335	3929	259	499	369	2078	144	651	402	769	254	559	664	149	54	120	515	248	128	530	88	96	46	71	1047	775	431	66	82	279	484	74	1399	725	631
A18	sample_11	1184	112931	3131	1024	4067	2238	1231	465	1690	490	311	517	2262	1111	487	1132	555	478	6640	193	1390	310	332	351	1328	178	507	268	135	1230	1373	235	723	121	363	185	227	1637	268	642	299	308	608	360	6514	1993	504	95
A18	sample_12	1184	98166	2382	1921	115	6583	1189	495	549	382	507	60	479	543	8024	328	81	48	4289	72	405	64	2096	49	329	274	73	172	61	323	553	312	2880	87	594	115	120	6	1269	298	155	182	468	274	335	552	1326	431
A18	sample_13	1184	209059	4353	2744	643	8599	2244	727	4416	1412	472	893	910	1275	3918	887	824	395	11644	237	1858	2267	1010	257	365	624	186	464	147	649	481	949	840	85	1272	383	217	6932	1750	99	306	481	661	624	290	4568	234	252
A18	sample_14	1184	83766	469	645	786	2406	873	415	1083	1969	239	301	809	427	2873	209	593	1119	6275	155	586	268	106	177	486	24	205	162	74	642	1074	271	151	457	714	86	133	578	386	143	199	327	428	120	133	1578	381	116
A18	sample_15	1184	195480	5283	973	2678	3590	1779	604	2193	1363	579	445	1191	696	9952	646	969	556	12400	381	1601	798	519	161	213	494	339	129	170	1138	1078	540	1010	262	1137	167	655	3698	539	85	224	139	433	272	225	1588	1796	1396
A18	sample_16	1184	104383	2257	931	3647	2610	1445	239	738	371	415	425	1166	614	733	607	271	671	2905	13	958	277	301	351	638	293	246	126	117	296	419	187	402	532	289	95	787	1679	94	250	99	108	179	232	1899	379	762	71
A18	sample_17	1184	201839	3734	1913	4403	8489	2030	467	2084	1180	834	518	1342	2338	11436	2299	409	868	4937	281	2409	284	151	345	1619	870	685	117	399	196	767	845	702	176	2361	65	295	5330	2363	1067	171	67	1239	149	7	738	817	508
A18	sample_18	1184	162918	14111	923	1324	2901	862	596	4760	1526	2344	273	91	343	7435	478	638	93	11527	154	661	682	175	100	219	1416	173	64	58	480	194	312	180	67	348	38	93	2312	392	102	101	208	248	36	392	710	463	1092
A18	sample_19	1184	166830	4740	1834	7528	3705	1572	307	3140	764	267	310	1569	1191	2607	583	902	298	9187	89	1585	245	1043	220	1462	414	343	194	147	1123	1443	260	719	100	926	141	415	2084	306	623	195	119	772	299	39	1432	1095	173
A18	sample_20	1184	162755	7486	1064	2400	3420	2338	492	3471	829	428	314	1959	355	8332	987	427	403	10051	329	1335	713	556	233	1094	185	344	218	118	2161	1261	220	391	452	87	128	364	3116	193	48	336	297	373	186	48	1559	1470	1470
A24	sample_41	1184	121534	1450	1789	1319	1478	1688	479	1087	376	410	351	1494	636	9133	423	354	554	3174	286	617	525	691	276	347	404	243	102	175	126	233	246	447	250	934	69	117	7688	165	550	172	211	351	120	93	1519	576	396
A24	sample_42	1184	63098	968	512	545	2577	909	360	1038	728	313	77	183	714	2317	200	130	216	3956	130	615	317	221	154	269	634	96	83	41	79	136	192	470	67	11	48	32	3119	214	92	63	71	475	71	184	1532	1039	93
A24	sample_43	1184	105347	1024	659	1687	2585	1620	496	834	194	107	544	1329	1126	1298	593	472	516	5634	336	962	470	823	684	332	77	271	487	118	141	815	541	80	386	67	165	438	2756	801	84	429	135	626	282	923	2306	1075	40
A24	sample_44	1184	135424	1556	1552	2149	4303	2396	852	991	1184	1167	343	315	1181	6757	465	357	167	5357	350	910	630	657	267	483	1297	224	230	102	153	663	386	2598	209	888	143	331	4686	50	436	234	74	409	189	418	1580	1387	350
A24	sample_45	1184	115680	1625	563	1601	2286	2189	658	1082	1007	185	1046	2602	1476	845	648	334	826	3272	666	1284	551	324	734	141	111	423	154	122	517	1728	337	458	582	329	153	240	297	487	398	129	187	211	330	4401	2986	274	64
A24	sample_46	1184	111518	3743	1062	3443	1914	2857	633	689	1276	333	505	857	1357	2371	471	382	976	4690	383	684	241	269	644	350	347	244	130	117	407	695	398	423	150	58	114	244	1496	271	371	184	208	717	375	671	1048	426	220
A24	sample_47	1184	97249	1137	931	4215	2921	2081	346	1277	210	567	517	1409	391	6256	229	78	679	1286	768	575	283	658	547	118	557	253	126	125	158	170	157	697	192	50	71	28	2050	225	274	90	57	174	155	91	753	770	663
A24	sample_49	1184	59765	1758	892	893	1992	953	250	457	214	248	145	373	312	4821	142	73	310	2295	156	373	173	469	153	73	239	98	54	44	27	69	212	256	85	12	70	36	1202	886	206	123	88	265	158	64	1122	545	143
A24	sample_50	1184	114141	973	736	3020	2031	1551	451	879	693	238	314	971	774	5592	319	44	583	4940	315	691	186	989	560	164	204	319	276	75	106	241	324	544	107	166	127	48	2681	244	170	163	191	415	140	58	1823	428	272
Relative Abundances
AGE	Group	numOtus	Sum	Otu0001	Otu0002	Otu0003	Otu0004	Otu0005	Otu0006	Otu0007	Otu0008	Otu0009	Otu0010	Otu0011	Otu0012	Otu0013	Otu0014	Otu0015	Otu0016	Otu0017	Otu0018	Otu0019	Otu0020	Otu0021	Otu0022	Otu0023	Otu0024	Otu0025	Otu0026	Otu0027	Otu0028	Otu0029	Otu0030	Otu0031	Otu0032	Otu0033	Otu0034	Otu0035	Otu0036	Otu0037	Otu0038	Otu0039	Otu0040	Otu0041	Otu0042	Otu0043	Otu0044	Otu0045	Otu0046
A8	sample_1	1184	150803	0.050503	0.00941626	0.0324927	0.0110674	0.00983402	0.00311665	0.0336598	0.00592163	0.00406491	0.00136602	0.00374661	0.00322275	0.0392499	0.00452909	0.00118035	0.00211534	0.0671671	0.000523862	0.0058288	0.00330232	0.0031697	0.000921732	0.00281825	0.00355431	0.000643223	0.000411132	0.00133286	0.00564975	0.00843485	0.00154506	0.003362	0.000417764	0.00901839	0.000629961	9.94675e-05	0.00164453	0.00368693	0.00157822	0.000616699	0.000198935	0.00189651	0.000649854	0.00481423	0.00620677	0.00638581	0.00162464
A8	sample_2	1184	122474	0.05869	0.0084671	0.00760161	0.0288061	0.0215719	0.00724235	0.016085	0.00577265	0.00124924	0.00333948	0.0107615	0.00813234	0.00863857	0.00570733	0.000857325	0.00845077	0.0638013	0.0011431	0.0141663	0.00382122	0.00241684	0.00257197	0.00241684	0.00195143	0.00223721	0.00159217	0.00066953	0.00674429	0.0321864	0.00391103	0.0025883	7.3485e-05	0.00249849	0.0011431	0.000269445	0.00019596	0.0032415	0.00259647	0.00279243	0.00218005	0.00355177	0.00700557	0.00360076	0.0127619	0.0034048	0.00494799
A8	sample_3	1184	78760	0.0328085	0.00863382	0.0418106	0.00669121	0.0141696	0.007161	0.0188294	0.00323768	0.00417725	0.00504063	0.0246699	0.0121889	0.00369477	0.00817674	0.00223464	0.00444388	0.0501397	0.00144744	0.0130396	0.000939563	0.00209497	0.00613255	0.00151092	0.000825292	0.00123159	0.000977654	0.00175216	0.0023997	0.00671661	0.00314881	0.00327577	0.00143474	0.000101574	0.00151092	0.00153631	6.3484e-05	0.00179025	0.00252666	0.0019934	0.00142204	0.00623413	0.00226003	0.0177247	0.00624683	0.00247588	0.000368207
A8	sample_4	1184	146753	0.0272226	0.0119384	0.0146982	0.0102281	0.0242039	0.00831329	0.0145619	0.0126335	0.00373417	0.0120406	0.0143506	0.0121156	0.00217372	0.0061532	0.00316859	0.00185345	0.0420094	0.0023577	0.0107255	0.00282107	0.0050493	0.00767276	0.00154	0.00148549	0.00185345	0.00111071	0.000586019	0.00378868	0.012211	0.0018739	0.0106574	0.00138328	0.00113115	0.00135602	0.0032231	0.0143983	0.00498797	0.00307319	0.00171036	0.00248717	0.00498116	0.00310045	0.00178531	0.00644621	0.00166266	0.000320266
A8	sample_5	1184	135160	0.0222181	0.00519384	0.0850252	0.0104099	0.0059559	0.00252294	0.0059781	0.00568215	0.000584492	0.00253033	0.0189923	0.00366972	0.0422314	0.00631104	0.00420983	0.00347736	0.0231577	0.000858242	0.00853063	0.00315182	0.00684374	0.00190885	0.00851583	0.000717668	0.00123557	0.000665877	0.000917431	0.000969222	0.0116825	0.00220479	0.00626665	0.000880438	0.0254217	0.000910033	0.000251554	0.000384729	0.00136135	0.000525303	0.00150192	0.000858242	0.00143534	0.0010876	0.000665877	0.00275969	0.00179787	0.00118378
A8	sample_6	1184	174060	0.0586809	0.00760083	0.00105711	0.0130587	0.00347007	0.00305067	0.0114156	0.00622199	0.0040216	0.00285534	0.00514191	0.00357923	0.0706883	0.010663	0.00240147	0.00108583	0.0598357	0.00275192	0.0117718	0.00860623	0.0011203	0.00324601	0.000689417	0.00198208	0.00195909	0.000741124	0.000873262	0.00442376	0.00371136	0.00214868	0.00385499	0.00194186	0.00356199	0.000907733	0.00242445	9.76675e-05	0.000459612	0.00203378	0.00125819	0.000229806	0.00354475	0.000959439	0.00203953	0.00920947	0.0017178	0.0122831
A8	sample_7	1184	164746	0.0406687	0.00936593	0.00935379	0.014143	0.0274422	0.00875287	0.00925667	0.00870431	0.00415185	0.00769063	0.012583	0.00795163	0.020389	0.0082005	0.0054933	0.00316851	0.04096	0.00253117	0.0117271	0.00629454	0.00876501	0.00271934	0.00284074	0.000437036	0.00105617	0.0047467	0.000880143	0.00191203	0.0272662	0.00572396	0.00360555	0.000297428	0.00761172	0.00233086	0.000497736	7.89094e-05	0.00569968	0.000801233	0.00394547	0.000352057	0.00533549	0.00333847	0.00118364	0.00994258	0.00587571	0.00261615
A8	sample_8	1184	169383	0.0110991	0.0101014	0.0284857	0.0183903	0.023314	0.0120378	0.0275175	0.0309181	0.00451639	0.00175342	0.00258586	0.00855458	0.0136082	0.00471712	0.00665946	0.00633476	0.0563457	0.00126341	0.00558498	0.00361902	0.0023497	0.00321166	0.00404409	0.00243826	0.000613993	0.00151727	0.000673031	0.00139329	0.0444555	0.00318804	0.00472893	0.000236151	0.00135787	0.0012457	0.00119256	2.95189e-05	0.000413265	0.00279249	0.00236742	0.000885567	0.00465808	0.00175933	0.0172154	0.00714948	0.00559678	0.00121618
A8	sample_9	1184	117096	0.0234508	0.00807884	0.0091378	0.0309746	0.0159271	0.00466284	0.0267558	0.0087962	0.00536312	0.00202398	0.00374906	0.0028609	0.0335537	0.00221186	0.00426146	0.00315126	0.0177461	0.00122976	0.00555954	0.00343308	0.00656726	0.00216916	0.00477386	0.00567056	0.00127246	0.00046116	0.0010248	0.0043981	0.00211792	0.00109312	0.0045262	0.00075152	0.00081984	0.00039284	0.00060634	0.00894138	0.0066185	0.00368074	0.00056364	0.00070028	0.00238266	0.00413336	0.00063196	0.0119475	0.0061915	0.00538874
A8	sample_10	1184	95770	0.00624413	0.00461522	0.0429258	0.0132505	0.0103059	0.0023807	0.0118722	0.0118304	0.00122168	0.0112248	0.00652605	0.00280881	0.00673489	0.00393651	0.0020048	0.00690195	0.0536285	0.00607706	0.00602485	0.00203613	0.00538791	0.0130521	0.000960635	0.000835335	0.00271484	0.000469876	0.00216143	0.00086666	0.00226585	0.0015036	0.00277749	0.00229717	0.00319516	0.000814451	0.00714211	0.0001253	0.00180641	0.00177509	0.00289235	0.000877101	0.00151404	0.0018795	0.00340399	0.0117991	0.0034562	0.000375901
A18	sample_11	1184	112931	0.0277249	0.00906748	0.0360131	0.0198174	0.0109005	0.00411756	0.0149649	0.00433893	0.00275389	0.00457802	0.0200299	0.00983787	0.00431237	0.0100238	0.00491451	0.00423267	0.058797	0.00170901	0.0123084	0.00274504	0.00293985	0.00310809	0.0117594	0.00157618	0.00448947	0.00237313	0.00119542	0.0108916	0.0121579	0.00208092	0.00640214	0.00107145	0.00321435	0.00163817	0.00201008	0.0144956	0.00237313	0.00568489	0.00264763	0.00272733	0.00538382	0.00318779	0.0576812	0.0176479	0.0044629	0.000841222
A18	sample_12	1184	98166	0.024265	0.0195689	0.00117149	0.0670599	0.0121121	0.00504248	0.00559257	0.00389137	0.00516472	0.00061121	0.00487949	0.00553145	0.0817391	0.00334128	0.000825133	0.000488968	0.0436913	0.000733452	0.00412566	0.000651957	0.0213516	0.000499154	0.00335147	0.00279119	0.000743638	0.00175213	0.000621396	0.00329034	0.00563331	0.00317829	0.0293381	0.000886254	0.00605097	0.00117149	0.00122242	6.1121e-05	0.0129271	0.00303567	0.00157896	0.001854	0.00476743	0.00279119	0.00341259	0.00562313	0.0135077	0.00439052
A18	sample_13	1184	209059	0.0208219	0.0131255	0.00307569	0.0411319	0.0107338	0.00347749	0.0211232	0.00675407	0.00225774	0.00427152	0.00435284	0.00609876	0.0187411	0.00424282	0.00394147	0.00188942	0.0556972	0.00113365	0.00888744	0.0108438	0.00483117	0.00122932	0.00174592	0.0029848	0.000889701	0.00221947	0.000703151	0.00310439	0.00230079	0.00453939	0.004018	0.000406584	0.00608441	0.00183202	0.00103798	0.0331581	0.00837084	0.000473551	0.0014637	0.00230079	0.00316179	0.0029848	0.00138717	0.0218503	0.0011193	0.0012054
A18	sample_14	1184	83766	0.00559893	0.00770002	0.00938328	0.0287229	0.0104219	0.00495428	0.0129289	0.023506	0.00285319	0.00359334	0.00965786	0.00509753	0.0342979	0.00249505	0.00707924	0.0133586	0.0749111	0.00185039	0.00699568	0.00319939	0.00126543	0.00211303	0.00580188	0.000286512	0.00244729	0.00193396	0.000883413	0.00766421	0.0128214	0.0032352	0.00180264	0.00545567	0.00852374	0.00102667	0.00158776	0.00690017	0.00460807	0.00170714	0.00237567	0.00390373	0.00510947	0.00143256	0.00158776	0.0188382	0.00454838	0.00138481
A18	sample_15	1184	195480	0.0270258	0.00497749	0.0136996	0.0183651	0.00910068	0.00308983	0.0112185	0.00697258	0.00296194	0.00227645	0.00609269	0.00356047	0.0509106	0.00330469	0.00495703	0.00284428	0.0634336	0.00194905	0.0081901	0.00408226	0.002655	0.000823614	0.00108963	0.00252711	0.00173419	0.000659914	0.000869654	0.00582157	0.00551463	0.00276243	0.00516677	0.00134029	0.00581645	0.000854307	0.00335073	0.0189175	0.00275732	0.000434827	0.0011459	0.00071107	0.00221506	0.00139145	0.00115101	0.00812359	0.00918764	0.0071414
A18	sample_16	1184	104383	0.0216223	0.00891908	0.0349386	0.0250041	0.0138433	0.00228964	0.00707012	0.00355422	0.00397574	0.00407154	0.0111704	0.00588218	0.00702222	0.00581512	0.00259621	0.00642825	0.0278302	0.000124541	0.00917774	0.00265369	0.00288361	0.00336262	0.00611211	0.00280697	0.00235671	0.00120709	0.00112087	0.00283571	0.00401406	0.00179148	0.0038512	0.00509662	0.00276865	0.00091011	0.00753954	0.016085	0.00090053	0.00239503	0.00094843	0.00103465	0.00171484	0.00222258	0.0181926	0.00363086	0.00730004	0.000680187
A18	sample_17	1184	201839	0.0184999	0.00947785	0.0218144	0.0420583	0.0100575	0.00231373	0.0103251	0.00584624	0.00413201	0.0025664	0.00664886	0.0115835	0.056659	0.0113903	0.00202637	0.00430046	0.0244601	0.0013922	0.0119353	0.00140706	0.000748121	0.00170928	0.00802124	0.00431037	0.00339379	0.00057967	0.00197682	0.000971071	0.00380006	0.00418651	0.00347802	0.000871982	0.0116974	0.000322039	0.00146156	0.0264072	0.0117074	0.00528639	0.00084721	0.000331948	0.00613856	0.000738212	3.46811e-05	0.00365638	0.00404778	0.00251686
A18	sample_18	1184	162918	0.0866141	0.00566543	0.00812679	0.0178065	0.00529101	0.00365828	0.0292172	0.00936668	0.0143876	0.00167569	0.000558563	0.00210535	0.0456365	0.00293399	0.00391608	0.000570839	0.0707534	0.000945261	0.00405726	0.00418615	0.00107416	0.000613806	0.00134423	0.00869149	0.00106188	0.000392836	0.000356007	0.00294627	0.00119078	0.00191507	0.00110485	0.00041125	0.00213604	0.000233246	0.000570839	0.0141912	0.00240612	0.000626082	0.000619944	0.00127672	0.00152224	0.00022097	0.00240612	0.00435802	0.00284192	0.00670276
A18	sample_19	1184	166830	0.0284122	0.0109932	0.0451238	0.0222082	0.00942277	0.0018402	0.0188216	0.00457951	0.00160043	0.00185818	0.00940478	0.007139	0.0156267	0.00349458	0.0054067	0.00178625	0.055068	0.000533477	0.00950069	0.00146856	0.00625187	0.00131871	0.00876341	0.00248157	0.00205599	0.00116286	0.000881136	0.0067314	0.00864952	0.00155847	0.00430978	0.000599413	0.00555056	0.000845172	0.00248756	0.0124918	0.0018342	0.00373434	0.00116885	0.000713301	0.00462747	0.00179224	0.000233771	0.00858359	0.00656357	0.00103698
A18	sample_20	1184	162755	0.0459955	0.00653743	0.0147461	0.0210132	0.0143652	0.00302295	0.0213265	0.00509355	0.00262972	0.00192928	0.0120365	0.00218119	0.0511935	0.00606433	0.00262358	0.00247611	0.0617554	0.00202144	0.00820251	0.00438082	0.00341618	0.0014316	0.00672176	0.00113668	0.00211361	0.00133944	0.000725016	0.0132776	0.00774784	0.00135172	0.00240238	0.00277718	0.000534546	0.000786458	0.00223649	0.0191453	0.00118583	0.000294922	0.00206445	0.00182483	0.00229179	0.00114282	0.000294922	0.00957881	0.00903198	0.00903198
A24	sample_41	1184	121534	0.0119308	0.0147202	0.0108529	0.0121612	0.0138891	0.00394128	0.008944	0.00309378	0.00337354	0.00288808	0.0122929	0.0052331	0.0751477	0.00348051	0.00291277	0.0045584	0.0261161	0.00235325	0.00507677	0.00431978	0.00568565	0.00227097	0.00285517	0.00332417	0.00199944	0.000839271	0.00143993	0.00103675	0.00191716	0.00202412	0.00367798	0.00205704	0.00768509	0.000567742	0.000962694	0.063258	0.00135764	0.00452548	0.00141524	0.00173614	0.00288808	0.000987378	0.000765218	0.0124986	0.00473941	0.00325835
A24	sample_42	1184	63098	0.0153412	0.00811436	0.00863736	0.0408412	0.0144062	0.00570541	0.0164506	0.0115376	0.00496054	0.00122032	0.00290025	0.0113157	0.0367207	0.00316967	0.00206029	0.00342325	0.0626961	0.00206029	0.00974674	0.00502393	0.00350249	0.00244065	0.00426321	0.0100479	0.00152144	0.00131541	0.000649783	0.00125202	0.00215538	0.00304289	0.00744873	0.00106184	0.000174332	0.000760721	0.000507148	0.049431	0.00339155	0.00145805	0.000998447	0.00112523	0.00752797	0.00112523	0.0029161	0.0242797	0.0164664	0.0014739
A24	sample_43	1184	105347	0.00972026	0.00625552	0.0160137	0.024538	0.0153778	0.00470825	0.00791669	0.00184153	0.00101569	0.00516389	0.0126155	0.0106885	0.0123212	0.00562902	0.00448043	0.0048981	0.0534804	0.00318946	0.00913173	0.00446145	0.00781228	0.00649283	0.00315149	0.000730918	0.00257245	0.00462282	0.00112011	0.00133843	0.00773634	0.00513541	0.000759395	0.00366408	0.000635993	0.00156625	0.00415769	0.0261612	0.00760344	0.000797365	0.00407226	0.00128148	0.00594227	0.00267687	0.00876152	0.0218896	0.0102044	0.000379698
A24	sample_44	1184	135424	0.0114898	0.0114603	0.0158687	0.0317743	0.0176926	0.00629135	0.00731776	0.00874291	0.00861738	0.00253279	0.00232603	0.00872076	0.0498951	0.00343366	0.00263616	0.00123316	0.0395572	0.00258448	0.00671964	0.00465206	0.00485143	0.00197159	0.00356658	0.00957733	0.00165406	0.00169837	0.00075319	0.00112978	0.00489573	0.00285031	0.0191842	0.0015433	0.00655718	0.00105594	0.00244418	0.0346024	0.000369211	0.00321952	0.00172791	0.000546432	0.00302014	0.00139562	0.0030866	0.0116671	0.0102419	0.00258448
A24	sample_45	1184	115680	0.0140474	0.00486687	0.0138399	0.0197614	0.0189229	0.00568811	0.00935339	0.00870505	0.00159924	0.00904219	0.0224931	0.0127593	0.00730463	0.00560166	0.00288728	0.00714039	0.0282849	0.00575726	0.0110996	0.00476314	0.00280083	0.00634509	0.00121888	0.000959544	0.00365664	0.00133126	0.00105463	0.00446923	0.0149378	0.00291321	0.0039592	0.00503112	0.00284405	0.00132261	0.00207469	0.00256743	0.00420989	0.00344053	0.00111515	0.00161653	0.001824	0.0028527	0.0380446	0.0258126	0.0023686	0.00055325
A24	sample_46	1184	111518	0.0335641	0.00952313	0.0308739	0.0171631	0.0256192	0.00567621	0.00617837	0.0114421	0.00298607	0.00452842	0.00768486	0.0121684	0.0212611	0.00422353	0.00342546	0.00875195	0.042056	0.00343442	0.00613354	0.00216109	0.00241217	0.00577485	0.00313851	0.00311161	0.00218799	0.00116573	0.00104916	0.00364964	0.00623218	0.00356893	0.00379311	0.00134507	0.000520095	0.00102226	0.00218799	0.0134149	0.0024301	0.00332682	0.00164996	0.00186517	0.00642946	0.00336269	0.00601697	0.00939759	0.00382001	0.00197278
A24	sample_47	1184	97249	0.0116916	0.00957336	0.0433423	0.0300363	0.0213987	0.00355788	0.0131312	0.00215941	0.00583039	0.00531625	0.0144886	0.00402061	0.0643297	0.00235478	0.000802065	0.00698208	0.0132238	0.00789725	0.00591266	0.00291006	0.00676614	0.00562474	0.00121338	0.00572757	0.00260157	0.00129564	0.00128536	0.0016247	0.00174809	0.00161441	0.00716717	0.00197431	0.000514144	0.000730085	0.000287921	0.0210799	0.00231365	0.00281751	0.000925459	0.000586124	0.00178922	0.00159385	0.000935742	0.00774301	0.00791782	0.00681755
A24	sample_49	1184	59765	0.0294152	0.0149251	0.0149419	0.0333305	0.0159458	0.00418305	0.00764662	0.00358069	0.00414959	0.00242617	0.00624111	0.00522045	0.0806659	0.00237597	0.00122145	0.00518698	0.0384004	0.00261022	0.00624111	0.00289467	0.0078474	0.00256003	0.00122145	0.003999	0.00163976	0.000903539	0.000736217	0.000451769	0.00115452	0.00354723	0.00428344	0.00142224	0.000200786	0.00117125	0.000602359	0.0201121	0.0148247	0.00344683	0.00205806	0.00147243	0.00443403	0.00264369	0.00107086	0.0187735	0.00911905	0.0023927
A24	sample_50	1184	114141	0.00852454	0.00644816	0.0264585	0.0177938	0.0135885	0.00395125	0.007701	0.00607144	0.00208514	0.00275098	0.00850702	0.00678109	0.048992	0.00279479	0.000385488	0.00510772	0.0432798	0.00275974	0.00605392	0.00162956	0.00866472	0.00490621	0.00143682	0.00178726	0.00279479	0.00241806	0.000657082	0.000928676	0.00211142	0.00283859	0.00476603	0.000937437	0.00145434	0.00111266	0.000420532	0.0234885	0.00213771	0.00148939	0.00142806	0.00167337	0.00363585	0.00122655	0.000508143	0.0159715	0.00374975	0.00238302
			MeanAge8	0.0361491	0.00875516	0.0255181	0.0159744	0.0162099	0.00631782	0.0182289	0.00976536	0.00354034	0.00429339	0.0107312	0.00691952	0.0260253	0.00629665	0.00338516	0.0037868	0.0467959	0.0015674	0.00965936	0.00399876	0.00426409	0.00339489	0.00323888	0.00211801	0.00134475	0.0013582	0.000967693	0.00351987	0.0165314	0.00275971	0.00476286	0.000824073	0.00572475	0.00115857	0.00112233	0.0028705	0.0031399	0.00217868	0.00186106	0.00103491	0.00377999	0.00269934	0.00551794	0.00807449	0.00390098	0.00332767
			StdAge8	0.0170143	0.00184818	0.0260528	0.00852636	0.00852667	0.00320658	0.00930395	0.00836872	0.00156466	0.00350672	0.0076989	0.00373886	0.0224855	0.00247227	0.00194302	0.00232877	0.0174507	0.000786546	0.00337212	0.00220633	0.00263859	0.0021451	0.00235143	0.00164659	0.000567016	0.00133836	0.000369545	0.00198311	0.0146468	0.00142153	0.0024528	0.000641773	0.00801026	0.000562993	0.0010882	0.00519632	0.00229078	0.00104531	0.0010743	0.000832851	0.00164928	0.00200223	0.00691232	0.00316884	0.00208185	0.00382978
			MeanAge18	0.030658	0.00960324	0.0188093	0.0303187	0.0106249	0.00338064	0.0152589	0.00739031	0.0042717	0.00274316	0.00848319	0.00590173	0.0366139	0.00531059	0.00382863	0.00383759	0.0536397	0.00123925	0.00833807	0.00356188	0.0047417	0.00162092	0.0054711	0.00295929	0.00212863	0.00136205	0.000933289	0.00575342	0.00638303	0.00265995	0.00618738	0.00189167	0.00523772	0.000961967	0.0023505	0.0161853	0.00490705	0.00236728	0.00148607	0.00166784	0.00369325	0.00179046	0.00863819	0.0101891	0.00626112	0.00349321
			StdAge18	0.0220812	0.00427328	0.0151358	0.015626	0.00256534	0.00109451	0.007344	0.00592573	0.00369918	0.00131527	0.00534716	0.00305261	0.0249906	0.00308968	0.00184902	0.00380732	0.0168541	0.000652117	0.00276835	0.00285724	0.00607793	0.000982289	0.00355227	0.00229805	0.00115854	0.000694853	0.000438304	0.0039437	0.0039303	0.00110764	0.00828289	0.00191057	0.00327054	0.000501286	0.0019891	0.00928246	0.00446332	0.00202558	0.000678887	0.00109274	0.00169735	0.00099132	0.0180594	0.00678378	0.00363809	0.00310386
			MeanAge24	0.0161917	0.009543	0.0200921	0.0252667	0.0174267	0.00485587	0.00940441	0.00635272	0.0038464	0.00398545	0.00994992	0.00854533	0.0440709	0.00367373	0.00231238	0.00525356	0.0385661	0.00362738	0.00734619	0.00364619	0.00559368	0.00426522	0.00245172	0.00436281	0.00229202	0.00173223	0.000971718	0.00176455	0.0047654	0.00305946	0.00611547	0.00211516	0.00228734	0.00103439	0.00151613	0.0282351	0.0042931	0.00272461	0.00171006	0.00132255	0.00416567	0.00198495	0.00690064	0.0164481	0.00762526	0.00242397
			StdAge24	0.00896633	0.00360105	0.0112584	0.0093327	0.00399944	0.00099762	0.00329239	0.00387863	0.00237592	0.00234363	0.00631777	0.00333158	0.0267106	0.00124437	0.00132206	0.00220612	0.0147608	0.00193492	0.0020916	0.00125772	0.00233618	0.00191379	0.00118562	0.00345609	0.000690297	0.00118095	0.000286866	0.00135496	0.00445228	0.00100507	0.00528588	0.00136115	0.00287628	0.000311584	0.00129762	0.018503	0.00445452	0.00121129	0.000958343	0.000485123	0.00206198	0.000892576	0.0120036	0.00659751	0.00446434	0.0018978
[truncated: 1,138 more columns]

## Sheet: OTU Name List
OTU	Size	Taxonomy	MeanAge8	StdAge8	MeanAge18	StdAge18	MeanAge24	StdAge24	ID
Otu0001	184143	Bacteria(100)-Bacteroidetes(100)-Bacteroidia(100)-Bacteroidales(100)-Porphyromonadaceae(100)-Barnesiella(100)-	0.0331586	0.0186213	0.030658	0.0220812	0.0161917	0.00896633	1
Otu0002	56844	Bacteria(100)-Firmicutes(100)-Clostridia(94)-Clostridiales(94)-Lachnospiraceae(89)-Robinsoniella(89)-	0.00834117	0.00217948	0.00960324	0.00427328	0.009543	0.00360105	2
Otu0003	138038	Bacteria(100)-Firmicutes(100)-Clostridia(100)-Clostridiales(100)-Ruminococcaceae(100)-Clostridium_IV(100)-	0.0272588	0.0251721	0.0188093	0.0151358	0.0200921	0.0112584	3
Otu0004	156198	Bacteria(100)-Firmicutes(100)-Erysipelotrichia(100)-Erysipelotrichales(100)-Erysipelotrichaceae(100)-Bulleidia(100)-	0.015702	0.00808474	0.0303187	0.015626	0.0252667	0.0093327	4
Otu0005	83658	Bacteria(100)-Firmicutes(100)-Clostridia(100)-Clostridiales(100)-unclassified-unclassified-	0.0156195	0.00825297	0.0106249	0.00256534	0.0174267	0.00399944	5
Otu0006	28956	Bacteria(100)-Firmicutes(100)-Clostridia(100)-Clostridiales(100)-Lachnospiraceae(100)-Robinsoniella(100)-	0.00592411	0.00326952	0.00338064	0.00109451	0.00485587	0.00099762	6
Otu0007	101878	Bacteria(100)-Bacteroidetes(100)-Bacteroidia(100)-Bacteroidales(100)-Porphyromonadaceae(100)-Tannerella(100)-	0.0175932	0.00899922	0.0152589	0.007344	0.00940441	0.00329239	7
Otu0008	48925	Bacteria(100)-Firmicutes(100)-Clostridia(54)-Clostridiales(54)-unclassified-unclassified-	0.00997186	0.00791708	0.00739031	0.00592573	0.00635272	0.00387863	8
Otu0009	22899	Bacteria(100)-Firmicutes(100)-Clostridia(100)-Clostridiales(100)-Ruminococcaceae(68)-Saccharofermentans(68)-	0.00330847	0.00164735	0.0042717	0.00369918	0.0038464	0.00237592	9
Otu0010	33087	Bacteria(100)-Firmicutes(100)-Clostridia(100)-Clostridiales(100)-Ruminococcaceae(100)-Flavonifractor(87)-	0.00498653	0.00396677	0.00274316	0.00131527	0.00398545	0.00234363	10
Otu0011	66681	Bacteria(100)-Firmicutes(100)-Clostridia(100)-Clostridiales(100)-Lachnospiraceae(100)-Roseburia(100)-	0.0103107	0.0073794	0.00848319	0.00534716	0.00994992	0.00631777	11
Otu0012	43532	Bacteria(100)-Firmicutes(100)-Clostridia(100)-Clostridiales(100)-Clostridiales_Incertae_Sedis_XIII(97)-Anaerovorax(97)-	0.00650845	0.00375708	0.00590173	0.00305261	0.00854533	0.00333158	12
Otu0013	190380	Bacteria(100)-Firmicutes(100)-Clostridia(100)-Clostridiales(100)-Ruminococcaceae(100)-Sporobacter(100)-	0.0240962	0.0220598	0.0366139	0.0249906	0.0440709	0.0267106	13
Otu0014	35106	Bacteria(100)-Firmicutes(100)-Clostridia(100)-Clostridiales(100)-Ruminococcaceae(100)-Clostridium_IV(65)-	0.00606064	0.00244745	0.00531059	0.00308968	0.00367373	0.00124437	14
Otu0015	24226	Bacteria(100)-Bacteroidetes(100)-Bacteroidia(100)-Bacteroidales(100)-Porphyromonadaceae(100)-Barnesiella(100)-	0.00324712	0.00188319	0.00382863	0.00184902	0.00231238	0.00132206	15
Otu0016	38009	Bacteria(100)-Firmicutes(100)-Clostridia(100)-Clostridiales(100)-Lachnospiraceae(100)-Clostridium_XlVa(95)-	0.00409831	0.00240645	0.00383759	0.00380732	0.00525356	0.00220612	16
Otu0017	329381	Bacteria(100)-Bacteroidetes(100)-Bacteroidia(100)-Bacteroidales(100)-Porphyromonadaceae(100)-Barnesiella(100)-	0.0474791	0.0165939	0.0536397	0.0168541	0.0385661	0.0147608	17
Otu0018	19949	Bacteria(100)-Firmicutes(100)-Clostridia(100)-Clostridiales(100)-Ruminococcaceae(100)-Pseudoflavonifractor(62)-	0.00201837	0.00160736	0.00123925	0.000652117	0.00362738	0.00193492	18
Otu0019	57205	Bacteria(100)-Firmicutes(100)-Clostridia(100)-Clostridiales(100)-Ruminococcaceae(100)-Pseudoflavonifractor(71)-	0.00929591	0.00338064	0.00833807	0.00276835	0.00734619	0.0020916	19
Otu0020	28173	Bacteria(100)-Bacteroidetes(100)-Bacteroidia(100)-Bacteroidales(100)-Porphyromonadaceae(100)-Parabacteroides(100)-	0.0038025	0.00217076	0.00356188	0.00285724	0.00364619	0.00125772	20
Otu0021	28848	Bacteria(100)-Firmicutes(100)-Clostridia(100)-Clostridiales(100)-Clostridiales_Incertae_Sedis_XII(100)-Guggenheimella(100)-	0.00437647	0.00251295	0.0047417	0.00607793	0.00559368	0.00233618	21
Otu0022	22396	Bacteria(100)-Firmicutes(100)-Clostridia(100)-Clostridiales(100)-Lachnospiraceae(100)-Clostridium_XlVa(81)-	0.00436061	0.00366283	0.00162092	0.000982289	0.00426522	0.00191379	22
Otu0023	22776	Bacteria(100)-Firmicutes(100)-Clostridia(100)-Clostridiales(100)-Ruminococcaceae(95)-Acetivibrio(94)-	0.00301106	0.00233107	0.0054711	0.00355227	0.00245172	0.00118562	23
Otu0024	17530	Bacteria(100)-Firmicutes(100)-Clostridia(100)-Clostridiales(100)-Clostridiales_Incertae_Sedis_XIII(62)-Anaerovorax(62)-	0.00198975	0.00160454	0.00295929	0.00229805	0.00436281	0.00345609	24
Otu0025	16071	Bacteria(100)-Firmicutes(100)-Clostridia(100)-Clostridiales(100)-Lachnospiraceae(100)-Johnsonella(89)-	0.00148176	0.000688112	0.00212863	0.00115854	0.00229202	0.000690297	25
Otu0026	9382	Bacteria(100)-Firmicutes(100)-Erysipelotrichia(100)-Erysipelotrichales(100)-Erysipelotrichaceae(100)-Holdemania(100)-	0.00126937	0.00129271	0.00136205	0.000694853	0.00173223	0.00118095	26
Otu0027	7407	Bacteria(100)-Firmicutes(100)-Clostridia(100)-Clostridiales(100)-Lachnospiraceae(100)-Dorea(65)-	0.00108707	0.000513702	0.000933289	0.000438304	0.000971718	0.000286866	27
Otu0028	26829	Bacteria(100)-Bacteroidetes(100)-Bacteroidia(100)-Bacteroidales(100)-Porphyromonadaceae(100)-Barnesiella(100)-	0.00325455	0.00204932	0.00575342	0.0039437	0.00176455	0.00135496	28
Otu0029	55110	Bacteria(100)-Firmicutes(100)-Clostridia(100)-Clostridiales(100)-Ruminococcaceae(100)-Flavonifractor(80)-	0.0151048	0.0145273	0.00638303	0.0039303	0.0047654	0.00445228	29
Otu0030	17466	Bacteria(100)-Firmicutes(93)-Erysipelotrichia(93)-Erysipelotrichales(93)-Erysipelotrichaceae(93)-Holdemania(93)-	0.0026341	0.00139786	0.00265995	0.00110764	0.00305946	0.00100507	30
Otu0031	30914	Bacteria(100)-Firmicutes(100)-Clostridia(100)-Clostridiales(100)-Lachnospiraceae(79)-Robinsoniella(79)-	0.00456433	0.00239623	0.00618738	0.00828289	0.00611547	0.00528588	31
Otu0032	12200	Bacteria(100)-Firmicutes(100)-Clostridia(100)-Clostridiales(100)-Lachnospiraceae(100)-Clostridium_XlVa(92)-	0.000971383	0.000763617	0.00189167	0.00191057	0.00211516	0.00136115	32
Otu0033	44012	Bacteria(100)-Firmicutes(100)-Clostridia(100)-Clostridiales(100)-Lachnospiraceae(100)-unclassified-	0.00547179	0.0075944	0.00523772	0.00327054	0.00228734	0.00287628	33
Otu0034	7058	Bacteria(100)-Firmicutes(83)-Clostridia(83)-Clostridiales(83)-unclassified-unclassified-	0.00112416	0.000541835	0.000961967	0.000501286	0.00103439	0.000311584	34
Otu0035	20953	Bacteria(100)-Firmicutes(100)-Clostridia(100)-Clostridiales(100)-Lachnospiraceae(100)-Syntrophococcus(100)-	0.00172431	0.00216249	0.0023505	0.0019891	0.00151613	0.00129762	35
Otu0036	129828	Bacteria(100)-Firmicutes(100)-Clostridia(100)-Clostridiales(100)-Lachnospiraceae(100)-Clostridium_XlVa(100)-	0.00259598	0.00497546	0.0161853	0.00928246	0.0282351	0.018503	36
Otu0037	26591	Bacteria(100)-Firmicutes(100)-Clostridia(100)-Clostridiales(100)-Ruminococcaceae(100)-Clostridium_IV(100)-	0.00300655	0.00220055	0.00490705	0.00446332	0.0042931	0.00445452	37
Otu0038	11804	Bacteria(100)-Firmicutes(100)-Clostridia(96)-Clostridiales(96)-Lachnospiraceae(72)-Robinsoniella(72)-	0.00213832	0.000993753	0.00236728	0.00202558	0.00272461	0.00121129	38
Otu0039	11183	Bacteria(100)-Firmicutes(100)-Erysipelotrichia(100)-Erysipelotrichales(100)-Erysipelotrichaceae(100)-Bulleidia(100)-	0.00196419	0.00106407	0.00148607	0.000678887	0.00171006	0.000958343	39
Otu0040	8736	Bacteria(100)-Firmicutes(100)-Clostridia(94)-Clostridiales(94)-Clostridiaceae_4(94)-Caminicella(94)-	0.00101913	0.000786803	0.00166784	0.00109274	0.00132255	0.000485123	40
Otu0041	21628	Bacteria(100)-Firmicutes(100)-Clostridia(100)-Clostridiales(100)-Lachnospiraceae(100)-Syntrophococcus(96)-	0.00355339	0.00171212	0.00369325	0.00169735	0.00416567	0.00206198	41
Otu0042	12994	Bacteria(100)-Proteobacteria(82)-Alphaproteobacteria(82)-Rickettsiales(82)-Rickettsiaceae(82)-Orientia(82)-	0.00261736	0.00190544	0.00179046	0.00099132	0.00198495	0.000892576	42
Otu0043	52094	Bacteria(100)-Firmicutes(100)-Clostridia(100)-Clostridiales(100)-Lachnospiraceae(100)-Clostridium_XlVa(99)-	0.00530655	0.00655119	0.00863819	0.0180594	0.00690064	0.0120036	43
Otu0044	92946	Bacteria(100)-Bacteroidetes(100)-Bacteroidia(100)-Bacteroidales(100)-Porphyromonadaceae(100)-Barnesiella(100)-	0.00844695	0.0032114	0.0101891	0.00678378	0.0164481	0.00659751	44
Otu0045	35117	Bacteria(100)-Firmicutes(100)-Clostridia(100)-Clostridiales(100)-Lachnospiraceae(99)-Robinsoniella(99)-	0.0038565	0.00196782	0.00626112	0.00363809	0.00762526	0.00446434	45
Otu0046	16310	Bacteria(100)-Firmicutes(100)-Clostridia(95)-Clostridiales(95)-Gracilibacteraceae(56)-Lutispora(56)-	0.0030325	0.00372945	0.00349321	0.00310386	0.00242397	0.0018978	46
Otu0047	24508	Bacteria(100)-Firmicutes(100)-Clostridia(100)-Clostridiales(100)-Lachnospiraceae(100)-Lachnospiracea_incertae_sedis(83)-	0.00158173	0.00124346	0.00220687	0.00283042	0.00340877	0.00255243	47
Otu0048	16315	Bacteria(100)-Firmicutes(100)-Clostridia(100)-Clostridiales(100)-Clostridiales_Incertae_Sedis_XIII(100)-Anaerovorax(100)-	0.0027465	0.00172979	0.00307548	0.00132049	0.00296184	0.00205321	48
Otu0049	4504	Bacteria(100)-Firmicutes(100)-Clostridia(100)-Clostridiales(100)-Lachnospiraceae(100)-Clostridium_XlVa(85)-	0.000453447	0.000245774	0.000413901	0.000502131	0.00106159	0.000572317	49
Otu0050	11274	Bacteria(100)-Firmicutes(100)-Clostridia(100)-Clostridiales(100)-Ruminococcaceae(100)-Butyricicoccus(100)-	0.00100558	0.00118284	0.00137559	0.00116692	0.00152011	0.000781709	50
Otu0051	7784	Bacteria(100)-Firmicutes(100)-Clostridia(100)-Clostridiales(100)-Lachnospiraceae(100)-Clostridium_XlVa(100)-	0.000840574	0.000314795	0.00115364	0.000799297	0.000839754	0.000434914	51
Otu0052	26371	Bacteria(100)-Bacteroidetes(100)-Bacteroidia(100)-Bacteroidales(100)-Porphyromonadaceae(100)-Barnesiella(100)-	0.00334674	0.00377298	0.00431415	0.00299526	0.00156319	0.00101938	52
Otu0053	4448	Bacteria(100)-Firmicutes(100)-Clostridia(93)-Clostridiales(93)-unclassified-unclassified-	0.000704154	0.000415686	0.00114488	0.00149026	0.000921188	0.000474537	53
Otu0054	7658	Bacteria(100)-Firmicutes(100)-Clostridia(100)-Clostridiales(100)-Ruminococcaceae(100)-Oscillibacter(100)-	0.000885346	0.000565236	0.000895971	0.000767962	0.00147045	0.000871607	54
Otu0055	24045	Bacteria(100)-Firmicutes(100)-Clostridia(100)-Clostridiales(100)-Clostridiales_Incertae_Sedis_XII(100)-Acidaminobacter(100)-	0.00331843	0.00168657	0.00232605	0.000812383	0.00397543	0.00109604	55
Otu0056	5690	Bacteria(100)-Firmicutes(100)-Erysipelotrichia(95)-Erysipelotrichales(95)-Erysipelotrichaceae(95)-Holdemania(93)-	0.00126628	0.000542827	0.000910041	0.000616816	0.00115687	0.000298159	56
Otu0057	17500	Bacteria(100)-Firmicutes(100)-Clostridia(100)-Clostridiales(100)-Lachnospiraceae(100)-Johnsonella(100)-	0.00426049	0.00630498	0.00116152	0.00203822	0.00141946	0.00240513	57
Otu0058	22341	Bacteria(100)-Firmicutes(100)-Clostridia(100)-Clostridiales(100)-Ruminococcaceae(100)-Clostridium_IV(100)-	0.00486379	0.00400403	0.00224305	0.00141486	0.00215645	0.00158216	58
Otu0059	254851	Bacteria(100)-Bacteroidetes(100)-Bacteroidia(100)-Bacteroidales(100)-Prevotellaceae(100)-Prevotella(100)-	0.0303602	0.0219167	0.0386792	0.0171015	0.0283243	0.0185979	59
Otu0060	1804	Bacteria(100)-Firmicutes(100)-Clostridia(100)-Clostridiales(100)-Lachnospiraceae(97)-Lachnospiracea_incertae_sedis(97)-	0.000144054	7.13563e-05	0.00013039	0.000102572	0.000255193	0.000128406	60
Otu0061	26068	Bacteria(100)-Firmicutes(100)-Clostridia(100)-Clostridiales(100)-Lachnospiraceae(100)-Parasporobacterium(61)-	0.00305807	0.0019961	0.00319192	0.00177221	0.00236215	0.00158517	61
Otu0062	3676	Bacteria(100)-Firmicutes(100)-Clostridia(100)-Clostridiales(100)-Ruminococcaceae(100)-Clostridium_IV(100)-	0.000324844	0.000199405	0.000341742	0.00028105	0.000427057	0.000373673	62
Otu0063	1276	Bacteria(100)-Firmicutes(100)-Clostridia(56)-Clostridiales(56)-unclassified-unclassified-	0.000227129	0.000167791	0.000157418	0.000208481	0.000172723	0.000117511	63
Otu0064	134968	Bacteria(100)-Bacteroidetes(100)-Bacteroidia(100)-Bacteroidales(100)-Porphyromonadaceae(100)-Barnesiella(100)-	0.0261385	0.012698	0.0186218	0.0117671	0.023813	0.00756434	64
Otu0065	4075	Bacteria(100)-Firmicutes(100)-Clostridia(100)-Clostridiales(100)-Ruminococcaceae(100)-Sporobacter(59)-	0.000402848	0.000848246	0.000630738	0.00112938	0.000363379	0.000417145	65
Otu0066	2089	Bacteria(100)-Firmicutes(100)-Clostridia(100)-Clostridiales(100)-Lachnospiraceae(100)-Dorea(76)-	0.000312337	0.000124773	0.000264699	0.000151521	0.000312561	0.000116952	66
Otu0067	7356	Bacteria(100)-Firmicutes(100)-Clostridia(100)-Clostridiales(100)-Lachnospiraceae(100)-Lachnospiracea_incertae_sedis(79)-	0.000360815	0.000668185	0.000693825	0.00141504	0.000748759	0.000676006	67
Otu0068	3082	Bacteria(100)-Firmicutes(100)-Clostridia(100)-Clostridiales(100)-Lachnospiraceae(100)-Roseburia(63)-	0.000181562	0.000147155	0.00049613	0.000728482	0.000456291	0.000289535	68
Otu0069	14472	Bacteria(100)-Firmicutes(100)-Clostridia(100)-Clostridiales(100)-Lachnospiraceae(100)-Lachnospiracea_incertae_sedis(61)-	0.00114804	0.000875477	0.00288316	0.00352762	0.00180197	0.00146237	69
Otu0070	38799	Bacteria(100)-Firmicutes(100)-Clostridia(100)-Clostridiales(100)-Ruminococcaceae(100)-Acetivibrio(93)-	0.00641994	0.0042995	0.00673172	0.00357752	0.00530407	0.00464727	70
Otu0071	13969	Bacteria(100)-Firmicutes(100)-Clostridia(100)-Clostridiales(100)-Lachnospiraceae(100)-Clostridium_XlVb(100)-	0.00296368	0.00385012	0.00327863	0.00579234	0.000840614	0.000586313	71
Otu0072	16860	Bacteria(100)-Firmicutes(100)-Clostridia(100)-Clostridiales(100)-Ruminococcaceae(100)-Anaerotruncus(100)-	0.00216739	0.00324349	0.00476074	0.00380655	0.00239858	0.00208595	72
Otu0073	2014	Bacteria(100)-Firmicutes(100)-Clostridia(100)-Clostridiales(100)-Lachnospiraceae(100)-Dorea(100)-	0.000222085	0.000140653	0.000338449	0.000331449	0.000318018	0.000192389	73
Otu0074	9350	Bacteria(100)-Firmicutes(100)-Erysipelotrichia(100)-Erysipelotrichales(100)-Erysipelotrichaceae(100)-Bulleidia(100)-	0.00191119	0.00212104	0.00145621	0.00185322	0.00182967	0.000970342	74
Otu0075	3160	Bacteria(100)-Firmicutes(100)-Clostridia(100)-Clostridiales(100)-Lachnospiraceae(100)-Lachnospiracea_incertae_sedis(100)-	0.000377252	0.000181388	0.000610506	0.000421898	0.000456221	0.000211195	75
Otu0076	29750	Bacteria(100)-Bacteroidetes(100)-Bacteroidia(100)-Bacteroidales(100)-Bacteroidaceae(100)-Bacteroides(100)-	0.00573212	0.00321233	0.00335388	0.0036316	0.00607538	0.00333359	76
Otu0077	23812	Bacteria(100)-Firmicutes(100)-Clostridia(100)-Clostridiales(100)-Lachnospiraceae(100)-Acetitomaculum(93)-	0.00120952	0.00172194	0.00592276	0.0063209	0.00281609	0.00254985	77
Otu0078	2904	Bacteria(100)-Firmicutes(100)-Clostridia(100)-Clostridiales(100)-Ruminococcaceae(100)-Sporobacter(64)-	0.00011505	9.92487e-05	0.000133334	0.000108758	0.0003058	0.000495508	78
Otu0079	16960	Bacteria(100)-Bacteroidetes(100)-Bacteroidia(100)-Bacteroidales(100)-Porphyromonadaceae(100)-Barnesiella(100)-	0.000296201	0.000808032	0.00293493	0.00481381	0.00083318	0.000962697	79
Otu0080	4773	Bacteria(100)-Firmicutes(100)-Clostridia(100)-Clostridiales(100)-Ruminococcaceae(100)-Sporobacter(100)-	0.00123294	0.00101895	0.000506382	0.000405502	0.000594583	0.000420195	80
Otu0081	2278	Bacteria(100)-Firmicutes(100)-Clostridia(100)-Clostridiales(100)-Lachnospiraceae(100)-Dorea(99)-	0.000246654	0.000230701	0.000388888	0.000334742	0.000207764	0.000139692	81
Otu0082	4641	Bacteria(100)-Firmicutes(100)-Clostridia(100)-Clostridiales(100)-Lachnospiraceae(51)-unclassified-	0.000101282	0.000210676	0.000183405	0.000257237	0.000498645	0.000876985	82
Otu0083	44183	Bacteria(100)-Firmicutes(100)-Clostridia(100)-Clostridiales(100)-Lachnospiraceae(100)-Clostridium_XlVa(100)-	0.0020343	0.00252568	0.00692491	0.0130338	0.00334985	0.00320335	83
Otu0084	919	Bacteria(100)-Firmicutes(100)-Clostridia(100)-Clostridiales(100)-Lachnospiraceae(100)-Johnsonella(100)-	7.90595e-05	7.54842e-05	7.72996e-05	0.000123811	0.000157269	9.1024e-05	84
Otu0085	64337	Bacteria(100)-Bacteroidetes(100)-Bacteroidia(100)-Bacteroidales(100)-Bacteroidaceae(100)-Bacteroides(100)-	0.00701514	0.00181168	0.0112469	0.0102411	0.00604329	0.00364479	85
Otu0086	3773	Bacteria(100)-Firmicutes(100)-Clostridia(100)-Clostridiales(100)-Lachnospiraceae(100)-Clostridium_XlVa(97)-	0.000654691	0.00123751	0.000315903	0.000293117	0.000624805	0.000539431	86
Otu0087	15055	Bacteria(100)-Firmicutes(100)-Clostridia(100)-Clostridiales(100)-Lachnospiraceae(100)-unclassified-	0.0015233	0.000899952	0.00166555	0.000863324	0.00294866	0.00186534	87
Otu0088	47377	Bacteria(100)-Firmicutes(100)-Clostridia(100)-Clostridiales(100)-Lachnospiraceae(100)-Lactonifactor(100)-	0.00392877	0.00229839	0.0105914	0.00536703	0.00789216	0.00379074	88
Otu0089	1295	Bacteria(100)-Firmicutes(100)-Clostridia(100)-Clostridiales(100)-Lachnospiraceae(100)-Blautia(87)-	0.000155067	8.64884e-05	0.000166563	8.52934e-05	0.000242827	0.000172736	89
Otu0090	3928	Bacteria(100)-Firmicutes(100)-Clostridia(100)-Clostridiales(100)-Lachnospiraceae(100)-Dorea(79)-	0.000414346	0.000256739	0.000591651	0.000231765	0.000515788	0.000300879	90
Otu0091	55669	Bacteria(100)-Bacteroidetes(100)-Bacteroidia(100)-Bacteroidales(100)-Porphyromonadaceae(100)-Barnesiella(100)-	0.0119913	0.00673498	0.00765226	0.00224907	0.00528519	0.00278809	91
Otu0092	2289	Bacteria(100)-Firmicutes(52)-Clostridia(52)-Clostridiales(52)-Ruminococcaceae(52)-Faecalibacterium(52)-	0.000209404	0.000108987	0.000204187	0.00013354	0.000343117	0.000163354	92
Otu0093	27602	Bacteria(100)-Firmicutes(100)-Clostridia(100)-Clostridiales(100)-Ruminococcaceae(100)-Flavonifractor(97)-	0.00518339	0.00256968	0.00300087	0.00186052	0.00442813	0.00106022	93
Otu0094	5771	Bacteria(100)-Firmicutes(100)-Clostridia(100)-Clostridiales(100)-Clostridiales_Incertae_Sedis_XIII(94)-Anaerovorax(94)-	0.00118124	0.000557825	0.000695275	0.000470033	0.000732322	0.000536671	94
Otu0095	1197	Bacteria(100)-Firmicutes(100)-Clostridia(100)-Clostridiales(100)-Lachnospiraceae(100)-Butyrivibrio(100)-	0.000109485	8.47738e-05	0.00019151	0.000184409	0.000138196	8.58334e-05	95
Otu0096	4231	Bacteria(100)-Firmicutes(100)-Clostridia(100)-Clostridiales(100)-Lachnospiraceae(100)-Lachnospiracea_incertae_sedis(100)-	0.000167677	0.000151509	0.000241755	0.000273531	0.000794856	0.000796843	96
Otu0097	23329	Bacteria(100)-Firmicutes(100)-Clostridia(100)-Clostridiales(100)-Peptostreptococcaceae(100)-Clostridium_XI(100)-	0.00739537	0.0109971	0.0040251	0.00426859	0.00322708	0.00315736	97
Otu0098	8622	Bacteria(100)-Firmicutes(100)-Clostridia(100)-Clostridiales(100)-Ruminococcaceae(100)-Sporobacter(100)-	0.00108272	0.000756826	0.000718583	0.000280461	0.00165811	0.00111849	98
Otu0099	5135	Bacteria(100)-Firmicutes(100)-Clostridia(100)-Clostridiales(100)-Clostridiales_Incertae_Sedis_XII(100)-Guggenheimella(100)-	0.000752904	0.000465278	0.000688293	0.000659645	0.000826982	0.000256183	99
Otu0100	9196	Bacteria(100)-Firmicutes(100)-Clostridia(91)-Clostridiales(91)-Clostridiales_Incertae_Sedis_XII(91)-Guggenheimella(91)-	0.000861576	0.00132642	0.00168316	0.00168068	0.00132619	0.00177032	100
Otu0101	8615	Bacteria(100)-Firmicutes(100)-Clostridia(100)-Clostridiales(100)-Lachnospiraceae(100)-Lachnospiracea_incertae_sedis(99)-	0.000738314	0.0012339	0.000463754	0.000645993	0.000735317	0.000632552	101
Otu0102	16777	Bacteria(100)-Firmicutes(100)-Clostridia(100)-Clostridiales(100)-Ruminococcaceae(100)-Oscillibacter(100)-	0.00112199	0.000796882	0.00168604	0.00116766	0.00232324	0.00102697	102
Otu0103	3685	Bacteria(100)-Firmicutes(100)-Clostridia(100)-Clostridiales(100)-Lachnospiraceae(100)-Lachnospiracea_incertae_sedis(87)-	0.000644488	0.000458658	0.000522583	0.000379924	0.00042752	0.000197972	103
Otu0104	3364	Bacteria(100)-Firmicutes(100)-Clostridia(100)-Clostridiales(100)-Clostridiaceae_1(100)-Anaerosporobacter(100)-	0.000482828	0.00102536	0.000348996	0.000549397	0.000130931	0.000177478	104
Otu0105	6449	Bacteria(100)-Firmicutes(100)-Clostridia(100)-Clostridiales(100)-Clostridiales_Incertae_Sedis_XII(100)-Guggenheimella(100)-	0.00112481	0.000802764	0.00104702	0.000619828	0.00103972	0.000391278	105
Otu0106	18839	Bacteria(100)-Firmicutes(100)-Clostridia(100)-Clostridiales(100)-Lachnospiraceae(100)-Lachnospiracea_incertae_sedis(100)-	0.00264031	0.00241138	0.00260347	0.00209045	0.00199425	0.0009857	106
Otu0107	1494	Bacteria(100)-Firmicutes(100)-Clostridia(100)-Clostridiales(100)-Lachnospiraceae(100)-Lachnospira(99)-	5.28392e-05	7.84979e-05	2.81128e-05	4.83939e-05	0.000386706	0.000785904	107
Otu0108	1865	Bacteria(100)-Firmicutes(100)-Clostridia(100)-Clostridiales(100)-Lachnospiraceae(100)-Dorea(76)-	0.00019148	0.00011225	0.0003463	0.000244816	0.000181698	0.000119991	108
Otu0109	5591	Bacteria(100)-Firmicutes(100)-Clostridia(100)-Clostridiales(100)-Clostridiaceae_1(54)-Anaerosporobacter(54)-	0.000523717	0.000238112	0.000665305	0.00034504	0.000939382	0.000204709	109
Otu0110	45194	Bacteria(100)-Firmicutes(100)-Clostridia(100)-Clostridiales(100)-Ruminococcaceae(100)-Ruminococcus(100)-	0.00390147	0.00602514	0.0159606	0.0238799	0.00858354	0.00452269	110
Otu0111	106776	Bacteria(100)-Bacteroidetes(100)-Bacteroidia(100)-Bacteroidales(100)-Prevotellaceae(100)-Hallella(100)-	0.0115884	0.0112065	0.0154765	0.00791556	0.0164551	0.0118439	111
Otu0112	3864	Bacteria(100)-Firmicutes(100)-Clostridia(100)-Clostridiales(100)-unclassified-unclassified-	0.00100027	0.000515969	0.000296853	0.000351609	0.000187203	0.000100187	112
Otu0113	79223	Bacteria(100)-Bacteroidetes(100)-Bacteroidia(100)-Bacteroidales(100)-Porphyromonadaceae(100)-Parabacteroides(100)-	0.0113595	0.00987089	0.0121342	0.00601307	0.00796951	0.00185609	113
Otu0114	2469	Bacteria(100)-Firmicutes(100)-Clostridia(100)-Clostridiales(100)-Lachnospiraceae(100)-Robinsoniella(100)-	0.000210153	0.000140583	0.000293617	0.000270078	0.000292559	0.000145542	114
Otu0115	1503	Bacteria(100)-Firmicutes(93)-Clostridia(93)-Clostridiales(93)-Clostridiales_Incertae_Sedis_XII(93)-Acidaminobacter(93)-	0.000608975	0.000497861	0.000348025	0.000510677	0.000179908	0.000178689	115
Otu0116	4340	Bacteria(100)-Firmicutes(100)-Clostridia(100)-Clostridiales(100)-Lachnospiraceae(100)-Roseburia(66)-	0.000284331	0.00016232	0.000584406	0.000554624	0.000298309	0.000221785	116
Otu0117	2361	Bacteria(100)-Firmicutes(100)-Clostridia(100)-Clostridiales(100)-Lachnospiraceae(100)-Butyrivibrio(91)-	0.000289758	0.000237355	0.000318358	0.000321038	0.000271209	0.000189536	117
Otu0118	2081	Bacteria(100)-Firmicutes(100)-Clostridia(100)-Clostridiales(100)-Clostridiales_Incertae_Sedis_XII(100)-Guggenheimella(100)-	0.000396622	0.000210003	0.00030894	0.00021572	0.000367371	0.000256019	118
Otu0119	63965	Bacteria(100)-Bacteroidetes(100)-Bacteroidia(100)-Bacteroidales(100)-Porphyromonadaceae(100)-Barnesiella(100)-	0.0126087	0.00508414	0.00958502	0.00396879	0.00782113	0.00284504	119
Otu0120	4874	Bacteria(100)-Firmicutes(100)-Clostridia(100)-Clostridiales(100)-Lachnospiraceae(100)-Lachnospiracea_incertae_sedis(100)-	0.00054527	0.000392615	0.000566829	0.000659126	0.000423852	0.000339746	120
Otu0121	625	Bacteria(100)-Firmicutes(100)-Clostridia(100)-Clostridiales(100)-Clostridiaceae_4(52)-Thermotalea(52)-	0.000131323	9.53444e-05	5.48021e-05	5.96077e-05	6.89966e-05	4.71428e-05	121
Otu0122	968	Bacteria(100)-Firmicutes(100)-Clostridia(100)-Clostridiales(100)-Eubacteriaceae(63)-Eubacterium(63)-	0.000140599	6.93276e-05	0.000121298	0.000103893	0.000136323	6.49347e-05	122
Otu0123	662	Bacteria(100)-Firmicutes(100)-Clostridia(100)-Clostridiales(100)-Lachnospiraceae(100)-Clostridium_XlVa(100)-	6.08223e-05	2.94092e-05	6.50146e-05	5.30852e-05	0.000120909	6.82823e-05	123
Otu0124	22079	Bacteria(100)-Bacteroidetes(100)-Bacteroidia(100)-Bacteroidales(100)-Rikenellaceae(100)-Alistipes(100)-	0.000517805	0.00107826	0.00433822	0.00476944	0.0018819	0.00187418	124
Otu0125	19957	Bacteria(100)-Firmicutes(100)-Clostridia(100)-Clostridiales(100)-Lachnospiraceae(100)-Robinsoniella(100)-	4.81272e-05	8.1928e-05	0.00523453	0.0132697	0.000505407	0.00104811	125
Otu0126	1345	Bacteria(100)-Firmicutes(100)-Clostridia(100)-Clostridiales(100)-Lachnospiraceae(100)-Clostridium_XlVa(100)-	9.72893e-05	9.5857e-05	2.07835e-05	1.74589e-05	0.000739076	0.000670665	126
Otu0127	12077	Bacteria(100)-Bacteroidetes(100)-Bacteroidia(100)-Bacteroidales(100)-Porphyromonadaceae(100)-Barnesiella(100)-	0.00140613	0.000476958	0.00208336	0.00123464	0.00154825	0.000834785	127
Otu0128	16898	Bacteria(100)-Bacteroidetes(100)-Bacteroidia(100)-Bacteroidales(100)-Porphyromonadaceae(100)-Barnesiella(100)-	0.00224407	0.0010444	0.00317438	0.00163821	0.00111434	0.000698944	128
Otu0129	2125	Bacteria(100)-Firmicutes(100)-Clostridia(100)-Clostridiales(100)-Lachnospiraceae(100)-Clostridium_XlVa(100)-	9.41175e-05	7.69075e-05	0.000377024	0.000356192	0.000169419	7.31266e-05	129
Otu0130	4490	Bacteria(100)-Firmicutes(100)-Clostridia(100)-Clostridiales(100)-Lachnospiraceae(100)-Lachnospiracea_incertae_sedis(100)-	0.000571594	0.000955409	0.000380339	0.000417903	0.000196464	0.000197525	130
Otu0131	1291	Bacteria(100)-Firmicutes(100)-Clostridia(100)-Clostridiales(100)-Clostridiaceae_1(100)-Anaerosporobacter(100)-	0.000225693	0.000188514	0.000130911	7.24682e-05	0.000255161	0.000154769	131
Otu0132	774	Bacteria(100)-Firmicutes(100)-Clostridia(59)-Clostridiales(59)-Clostridiales_Incertae_Sedis_XIII(59)-Anaerovorax(59)-	0.000169302	0.000121602	9.25082e-05	0.0001044	7.5801e-05	5.65918e-05	132
Otu0133	3208	Bacteria(100)-Firmicutes(100)-Clostridia(100)-Clostridiales(100)-Lachnospiraceae(100)-unclassified-	0.000391462	0.000480943	0.00052617	0.000506417	0.000168711	0.000199389	133
Otu0134	3168	Bacteria(100)-Firmicutes(100)-Clostridia(100)-Clostridiales(100)-Lachnospiraceae(100)-Syntrophococcus(91)-	0.000212939	8.7691e-05	0.000511794	0.000432545	0.000253438	0.000111595	134
Otu0135	1505	Bacteria(100)-Firmicutes(100)-Clostridia(100)-Clostridiales(100)-Clostridiaceae_1(100)-Anaerosporobacter(100)-	0.000131195	8.06287e-05	0.00016747	7.34963e-05	0.000263569	0.000138614	135
Otu0136	2458	Bacteria(100)-Firmicutes(100)-Clostridia(100)-Clostridiales(100)-Ruminococcaceae(100)-Hydrogenoanaerobacterium(100)-	0.00034911	0.000308868	0.00022589	0.000245603	0.000296452	0.000179819	136
Otu0137	3311	Bacteria(100)-Firmicutes(100)-Clostridia(96)-Clostridiales(96)-Clostridiales_Incertae_Sedis_XII(96)-Guggenheimella(96)-	0.00044234	0.000394238	0.000478257	0.000345713	0.000498828	0.00028379	137
Otu0138	38466	Bacteria(100)-Firmicutes(100)-Clostridia(100)-Clostridiales(100)-Lachnospiraceae(100)-Clostridium_XlVa(81)-	0.00280913	0.00389032	0.00575732	0.0076891	0.0177544	0.0256802	138
Otu0139	2786	Bacteria(100)-Firmicutes(100)-Clostridia(100)-Clostridiales(100)-Clostridiaceae_1(69)-Anaerosporobacter(69)-	0.000421532	0.000177652	0.000309841	0.000160282	0.00039668	0.000100157	139
Otu0140	12384	Bacteria(100)-Firmicutes(100)-Clostridia(100)-Clostridiales(100)-Lachnospiraceae(87)-unclassified-	0.00424927	0.00358388	0.00139837	0.00081579	0.00115243	0.000682694	140
Otu0141	2524	Bacteria(100)-Firmicutes(100)-Clostridia(100)-Clostridiales(100)-Lachnospiraceae(100)-Lachnospiracea_incertae_sedis(100)-	0.000108865	0.000139056	0.00024647	0.000321802	0.000236882	0.000249842	141
Otu0142	23195	Bacteria(100)-Firmicutes(100)-Clostridia(100)-Clostridiales(100)-Ruminococcaceae(100)-Butyricicoccus(100)-	0.00313256	0.00445784	0.00143522	0.0016224	0.00114845	0.000952101	142
Otu0143	973	Bacteria(100)-Firmicutes(100)-Clostridia(100)-Clostridiales(100)-Lachnospiraceae(100)-unclassified-	9.68023e-05	7.61463e-05	5.79066e-05	4.35895e-05	0.000515851	0.000459673	143
Otu0144	2858	Bacteria(100)-Firmicutes(100)-Negativicutes(76)-Selenomonadales(76)-Veillonellaceae(76)-Anaerovibrio(76)-	0.000285347	0.000218625	0.000332889	0.000277316	0.000277731	0.000176741	144
Otu0145	12429	Bacteria(100)-Firmicutes(100)-Bacilli(100)-Lactobacillales(100)-Lactobacillaceae(100)-Lactobacillus(100)-	0.00261089	0.00203734	0.00168755	0.000875945	0.00111767	0.000972266	145
Otu0146	982	Bacteria(100)-Firmicutes(100)-Clostridia(100)-Clostridiales(100)-Clostridiaceae_1(85)-Anaerosporobacter(85)-	0.000170102	0.000155417	7.75092e-05	8.17436e-05	0.000113426	0.000180295	146
Otu0147	3239	Bacteria(100)-Proteobacteria(100)-Alphaproteobacteria(100)-Rickettsiales(100)-Rickettsiaceae(100)-Orientia(100)-	0.000250584	0.00027056	0.000919017	0.00108479	0.000687077	0.000415126	147
Otu0148	10033	Bacteria(100)-Bacteroidetes(100)-Bacteroidia(100)-Bacteroidales(100)-Rikenellaceae(100)-Alistipes(100)-	0.00150356	0.00136199	0.00135686	0.000999143	0.00154202	0.000771048	148
Otu0149	99	Bacteria(100)-Bacteroidetes(100)-Flavobacteria(81)-Flavobacteriales(81)-Cryomorphaceae(81)-Brumimicrobium(65)-	5.19132e-05	4.58525e-05	5.42282e-06	1.21457e-05	0	0	149
Otu0150	84616	Bacteria(100)-Bacteroidetes(100)-Bacteroidia(100)-Bacteroidales(100)-Porphyromonadaceae(100)-Barnesiella(100)-	0.0135678	0.00643176	0.0112513	0.00486457	0.0124363	0.00499282	150
Otu0151	514	Bacteria(100)-Firmicutes(100)-Clostridia(100)-Clostridiales(100)-Ruminococcaceae(100)-Clostridium_IV(100)-	5.69057e-05	3.78644e-05	7.16405e-05	4.92544e-05	8.02043e-05	3.2271e-05	151
Otu0152	491	Bacteria(100)-Firmicutes(100)-Clostridia(100)-Clostridiales(100)-Lachnospiraceae(100)-Dorea(87)-	1.72316e-05	1.75419e-05	5.74412e-05	6.30624e-05	4.91716e-05	5.20795e-05	152
Otu0153	2772	Bacteria(100)-Firmicutes(100)-Clostridia(100)-Clostridiales(100)-Lachnospiraceae(100)-Blautia(100)-	0.000349605	0.000261714	0.000543163	0.000580732	0.000780534	0.000913672	153
Otu0154	44805	Bacteria(100)-Bacteroidetes(100)-Bacteroidia(100)-Bacteroidales(100)-Bacteroidaceae(100)-Bacteroides(100)-	0.00555473	0.00288998	0.00729494	0.00583616	0.00745023	0.00524926	154
Otu0155	1619	Bacteria(100)-Firmicutes(100)-Clostridia(100)-Clostridiales(100)-Clostridiales_Incertae_Sedis_XIII(100)-Anaerovorax(100)-	0.000199267	0.000115372	0.000241854	9.91025e-05	0.000278072	0.000117127	155
Otu0156	11676	Bacteria(100)-Firmicutes(100)-Clostridia(100)-Clostridiales(100)-Lachnospiraceae(100)-Clostridium_XlVa(75)-	0.00448892	0.0133306	0.00111296	0.00117945	0.00171785	0.00139991	156
Otu0157	1532	Bacteria(100)-Firmicutes(100)-Clostridia(100)-Clostridiales(100)-Clostridiales_Incertae_Sedis_XII(100)-Guggenheimella(100)-	0.000204234	0.000224789	0.000331695	0.000373798	0.000270245	0.000218137	157
Otu0158	37365	Bacteria(100)-Firmicutes(100)-Clostridia(100)-Clostridiales(100)-Lachnospiraceae(100)-Lachnospiracea_incertae_sedis(100)-	0.000629019	0.00080633	0.00573852	0.0109513	0.00475385	0.00863479	158
Otu0159	1719	Bacteria(100)-Firmicutes(100)-Clostridia(100)-Clostridiales(100)-Lachnospiraceae(100)-Lachnospiracea_incertae_sedis(85)-	0.000195891	0.000235012	0.000159714	0.00028797	0.000594663	0.000621518	159
Otu0160	1506	Bacteria(100)-Firmicutes(100)-Erysipelotrichia(100)-Erysipelotrichales(100)-Erysipelotrichaceae(100)-Bulleidia(100)-	0.00030204	0.000324386	0.000165396	0.000128485	0.000264477	0.000183142	160
Otu0161	3432	Bacteria(100)-Firmicutes(100)-Clostridia(100)-Clostridiales(100)-Lachnospiraceae(100)-Acetitomaculum(98)-	0.000279267	0.000245411	0.00042726	0.000789656	0.000496474	0.000789149	161
Otu0162	16204	Bacteria(100)-Bacteroidetes(100)-Bacteroidia(100)-Bacteroidales(100)-Bacteroidaceae(100)-Bacteroides(100)-	0.00264204	0.000825084	0.00220295	0.00109006	0.00240958	0.000699643	162
Otu0163	3744	Bacteria(100)-Firmicutes(100)-Clostridia(100)-Clostridiales(100)-Ruminococcaceae(100)-unclassified-	0.000545209	0.000268205	0.000473198	0.000249257	0.00055877	0.000251818	163
Otu0164	259	Bacteria(100)-Firmicutes(100)-Clostridia(100)-Clostridiales(100)-Ruminococcaceae(100)-Oscillibacter(100)-	3.7538e-05	4.8645e-05	2.71124e-05	2.52745e-05	4.10461e-05	4.90874e-05	164
Otu0165	3978	Bacteria(100)-Firmicutes(100)-Clostridia(100)-Clostridiales(100)-Lachnospiraceae(100)-Clostridium_XlVa(100)-	0.00011423	8.71886e-05	0.000152961	0.000114492	0.000406497	0.000397687	165
Otu0166	524	Bacteria(100)-Firmicutes(100)-Clostridia(100)-Clostridiales(100)-Lachnospiraceae(100)-Parasporobacterium(100)-	7.473e-05	6.42109e-05	3.52975e-05	3.24626e-05	3.84635e-05	3.75364e-05	166
Otu0167	1772	Bacteria(100)-Firmicutes(100)-Clostridia(100)-Clostridiales(100)-Lachnospiraceae(100)-Lachnospiracea_incertae_sedis(76)-	0.000123421	0.000145321	0.000491056	0.00120545	0.000733897	0.000877616	167
Otu0168	1626	Bacteria(100)-Firmicutes(100)-Clostridia(100)-Clostridiales(100)-Lachnospiraceae(100)-Clostridium_XlVa(100)-	0.000210554	0.000172597	0.00029929	0.000398386	0.000180427	0.000106253	168
Otu0169	4738	Bacteria(100)-Firmicutes(100)-Clostridia(100)-Clostridiales(100)-Lachnospiraceae(100)-Syntrophococcus(89)-	0.000649905	0.000381945	0.000552506	0.000489162	0.000838947	0.000510141	169
Otu0170	1263	Bacteria(100)-Firmicutes(100)-Clostridia(82)-Clostridiales(82)-Clostridiaceae_1(82)-Oxobacter(82)-	0.000241573	0.000169054	0.000141152	6.97574e-05	0.000191298	8.69851e-05	170
Otu0171	6347	Bacteria(100)-Firmicutes(100)-Clostridia(100)-Clostridiales(100)-Lachnospiraceae(100)-Syntrophococcus(84)-	0.00010198	0.000145675	0.00116356	0.0032061	0.000553506	0.000675528	171
Otu0172	626	Bacteria(100)-Firmicutes(100)-Clostridia(100)-Clostridiales(100)-Lachnospiraceae(100)-Dorea(100)-	6.57613e-05	8.61857e-05	8.95476e-05	7.69948e-05	5.38526e-05	5.14554e-05	172
Otu0173	10444	Bacteria(100)-Firmicutes(100)-Negativicutes(100)-Selenomonadales(100)-Veillonellaceae(100)-Anaerosinus(70)-	0.00303437	0.00325621	0.00119976	0.00114315	0.000947916	0.00111465	173
Otu0174	1373	Bacteria(100)-Firmicutes(100)-Clostridia(100)-Clostridiales(100)-Lachnospiraceae(100)-Roseburia(99)-	9.39368e-05	0.000150068	8.68134e-05	0.000161664	0.000218621	0.000256552	174
Otu0175	3686	Bacteria(100)-Firmicutes(100)-Clostridia(100)-Clostridiales(100)-Ruminococcaceae(100)-Anaerotruncus(98)-	0.000397893	0.000524571	0.000271506	0.000148669	0.000493557	0.000444438	175
Otu0176	3670	Bacteria(100)-Firmicutes(100)-Clostridia(100)-Clostridiales(100)-Lachnospiraceae(100)-Lachnospiracea_incertae_sedis(91)-	0.000169827	0.000186691	0.000199746	0.000166626	0.000319416	0.000485212	176
Otu0177	2225	Bacteria(100)-Firmicutes(100)-Negativicutes(100)-Selenomonadales(100)-Veillonellaceae(100)-Anaerosinus(100)-	0.000362298	0.00036216	6.3448e-05	7.63421e-05	0.00162939	0.00261648	177
Otu0178	47202	Bacteria(100)-Firmicutes(100)-Clostridia(100)-Clostridiales(100)-Ruminococcaceae(100)-Ruminococcus(100)-	0.00349856	0.00304725	0.00908435	0.00313381	0.00398497	0.000960717	178
Otu0179	17841	Bacteria(100)-Firmicutes(100)-Clostridia(100)-Clostridiales(100)-Lachnospiraceae(100)-Lachnospiracea_incertae_sedis(100)-	0.00126559	0.002353	0.00314855	0.00771212	0.00199802	0.00496423	179
Otu0180	2582	Bacteria(100)-Firmicutes(100)-Clostridia(100)-Clostridiales(100)-Clostridiales_Incertae_Sedis_XII(100)-Guggenheimella(100)-	0.000457219	0.00034541	0.000218117	0.000214932	0.000620632	0.000576982	180
Otu0181	1104	Bacteria(100)-Firmicutes(90)-Clostridia(90)-Clostridiales(90)-Ruminococcaceae(90)-Anaerofilum(74)-	0.000111311	5.84955e-05	0.000134272	7.14852e-05	8.82274e-05	5.29469e-05	181
Otu0182	952	Bacteria(100)-Firmicutes(100)-Clostridia(100)-Clostridiales(100)-Ruminococcaceae(100)-Clostridium_IV(100)-	9.55192e-05	6.34447e-05	5.0603e-05	4.94853e-05	0.000229204	0.00034976	182
Otu0183	14887	Bacteria(100)-Bacteroidetes(100)-Bacteroidia(100)-Bacteroidales(100)-Rikenellaceae(100)-Alistipes(100)-	0.00215873	0.00139534	0.00206521	0.00143348	0.00188467	0.0010163	183
Otu0184	915	Bacteria(100)-Firmicutes(100)-Clostridia(100)-Clostridiales(100)-Lachnospiraceae(100)-Acetitomaculum(100)-	7.69711e-05	0.000120172	9.19015e-05	8.82079e-05	0.000266346	0.000255766	184
Otu0185	1130	Bacteria(100)-Firmicutes(100)-Clostridia(100)-Clostridiales(100)-Ruminococcaceae(100)-Sporobacter(100)-	6.95339e-05	4.29809e-05	0.000111572	6.62363e-05	0.00013105	8.46527e-05	185
Otu0186	799	Bacteria(100)-Firmicutes(100)-Clostridia(100)-Clostridiales(100)-Ruminococcaceae(100)-Oscillibacter(100)-	6.61702e-05	5.7076e-05	6.32088e-05	4.20297e-05	0.000179871	0.000126137	186
Otu0187	13793	Bacteria(100)-Firmicutes(100)-Clostridia(100)-Clostridiales(100)-Lachnospiraceae(100)-Marvinbryantia(56)-	0.00214629	0.00537762	0.00182235	0.00157443	0.000565096	0.000492534	187
Otu0188	11288	Bacteria(100)-Bacteroidetes(100)-Bacteroidia(100)-Bacteroidales(100)-Porphyromonadaceae(100)-Barnesiella(100)-	0.00152156	0.0010813	0.00129439	0.000672047	0.00107928	0.000797928	188
Otu0189	1269	Bacteria(100)-Firmicutes(100)-Clostridia(100)-Clostridiales(100)-Ruminococcaceae(100)-Flavonifractor(100)-	9.83328e-05	7.03021e-05	9.19147e-05	6.99813e-05	0.000153558	0.000147405	189
Otu0190	508	Bacteria(100)-Firmicutes(100)-Clostridia(100)-Clostridiales(100)-Lachnospiraceae(100)-Robinsoniella(100)-	9.69498e-05	6.56785e-05	4.28852e-05	5.80994e-05	0.000109854	9.9291e-05	190
Otu0191	4289	Bacteria(100)-Firmicutes(100)-Clostridia(100)-Clostridiales(100)-Lachnospiraceae(100)-Robinsoniella(100)-	0.000776237	0.00117979	0.000890337	0.00110666	0.000368343	0.000731478	191
Otu0192	474	Bacteria(100)-Firmicutes(100)-Clostridia(100)-Clostridiales(53)-Eubacteriaceae(53)-Alkalibacter(53)-	7.27407e-05	4.08945e-05	7.61421e-05	4.92903e-05	6.34973e-05	2.72837e-05	192
Otu0193	2176	Bacteria(100)-Firmicutes(100)-Clostridia(100)-Clostridiales(100)-Lachnospiraceae(100)-Clostridium_XlVa(57)-	0.000190142	8.43134e-05	0.000251205	0.00022033	0.00050905	0.000231261	193
Otu0194	561	Bacteria(100)-Firmicutes(100)-Clostridia(100)-Clostridiales(100)-Ruminococcaceae(100)-Oscillibacter(100)-	4.71647e-05	4.36166e-05	5.14072e-05	4.46202e-05	7.84229e-05	7.42174e-05	194
Otu0195	13293	Bacteria(100)-Firmicutes(100)-Clostridia(100)-Clostridiales(100)-Lachnospiraceae(100)-Roseburia(90)-	0.00121368	0.000799569	0.0008985	0.000751869	0.00237223	0.00178902	195
Otu0196	630	Bacteria(100)-Firmicutes(100)-Clostridia(100)-Clostridiales(100)-Ruminococcaceae(100)-Sporobacter(100)-	0.00011719	9.56356e-05	6.20329e-05	6.62752e-05	7.13464e-05	4.60039e-05	196
Otu0197	15648	Bacteria(100)-Firmicutes(100)-Clostridia(100)-Clostridiales(100)-Lachnospiraceae(100)-Lachnospiracea_incertae_sedis(62)-	0.00135683	0.00157127	0.00328134	0.00377638	0.0034587	0.00235938	197
Otu0198	1640	Bacteria(100)-Firmicutes(100)-Erysipelotrichia(100)-Erysipelotrichales(100)-Erysipelotrichaceae(100)-Holdemania(100)-	0.000225386	0.000117828	0.00022213	9.4623e-05	0.000294594	0.000245996	198
Otu0199	30948	Bacteria(100)-Firmicutes(100)-Clostridia(100)-Clostridiales(100)-Lachnospiraceae(100)-Lachnospiracea_incertae_sedis(100)-	0.00158872	0.00187482	0.00499524	0.00329977	0.00260694	0.0025183	199
Otu0200	466	Bacteria(100)-Firmicutes(100)-Clostridia(100)-Clostridiales(100)-Clostridiales_Incertae_Sedis_XII(59)-Fusibacter(59)-	0.000102198	7.15849e-05	4.1085e-05	3.91692e-05	8.43238e-05	5.79016e-05	200
Otu0201	1398	Bacteria(100)-Firmicutes(100)-Clostridia(100)-Clostridiales(100)-Ruminococcaceae(100)-Sporobacter(100)-	5.08943e-05	5.57821e-05	8.53315e-05	6.66736e-05	0.000129121	0.00014176	201
Otu0202	847	Bacteria(100)-Firmicutes(100)-Clostridia(100)-Clostridiales(100)-Lachnospiraceae(100)-Lachnospiracea_incertae_sedis(61)-	0.000156297	0.000197092	9.67618e-05	7.18821e-05	0.000181897	0.000190634	202
Otu0203	2985	Bacteria(100)-Firmicutes(100)-Clostridia(100)-Clostridiales(100)-Ruminococcaceae(100)-Clostridium_IV(100)-	0.000453983	0.000273881	0.000521458	0.000318893	0.000329109	0.000243869	203
Otu0204	704	Bacteria(100)-Firmicutes(100)-Clostridia(100)-Clostridiales(100)-Clostridiaceae_1(100)-Anaerosporobacter(100)-	6.56242e-05	5.9001e-05	0.000110255	8.50765e-05	9.85465e-05	9.09145e-05	204
Otu0205	3045	Bacteria(100)-Firmicutes(100)-Clostridia(100)-Clostridiales(100)-Lachnospiraceae(100)-Clostridium_XlVa(97)-	0.0003703	0.000237789	0.000512667	0.000330535	0.000413193	0.000312488	205
Otu0206	2648	Bacteria(100)-Firmicutes(100)-Clostridia(100)-Clostridiales(100)-Ruminococcaceae(100)-Sporobacter(100)-	0.000223314	0.000118328	0.000380142	0.000296033	0.000583802	0.000312407	206
Otu0207	16693	Bacteria(100)-Firmicutes(100)-Clostridia(100)-Clostridiales(100)-Ruminococcaceae(100)-Hydrogenoanaerobacterium(100)-	0.00215858	0.00277979	0.000990721	0.000702627	0.0051581	0.00340203	207
Otu0208	107797	Bacteria(100)-Firmicutes(100)-Bacilli(100)-Lactobacillales(100)-Lactobacillaceae(100)-Lactobacillus(100)-	0.0151681	0.0104451	0.0136217	0.00999827	0.0153084	0.0109613	208
Otu0209	1463	Bacteria(100)-Firmicutes(100)-Clostridia(100)-Clostridiales(100)-Lachnospiraceae(100)-Clostridium_XlVa(100)-	0.000247758	0.000253255	0.000140031	5.57437e-05	0.000167491	0.000120806	209
Otu0210	554	Bacteria(100)-Firmicutes(100)-Erysipelotrichia(100)-Erysipelotrichales(100)-Erysipelotrichaceae(100)-Bulleidia(100)-	0.000101673	9.83667e-05	0.000123977	9.87448e-05	5.64358e-05	5.99818e-05	210
Otu0211	2601	Bacteria(100)-Firmicutes(100)-Clostridia(100)-Clostridiales(100)-Lachnospiraceae(100)-Dorea(100)-	0.000297698	0.000300469	0.000463013	0.00033844	0.000251119	0.000167159	211
Otu0212	354	Bacteria(100)-Firmicutes(100)-Clostridia(100)-Clostridiales(100)-Ruminococcaceae(100)-Faecalibacterium(100)-	2.72495e-05	2.92724e-05	1.12496e-05	1.37538e-05	6.49204e-05	4.71222e-05	212
Otu0213	764	Bacteria(100)-Proteobacteria(91)-Alphaproteobacteria(91)-Rickettsiales(91)-Rickettsiaceae(91)-Orientia(91)-	0.000167293	9.55235e-05	0.000216177	0.000212716	0.000119254	0.000120033	213
Otu0214	874	Bacteria(100)-Firmicutes(100)-Clostridia(100)-Clostridiales(100)-Ruminococcaceae(100)-Flavonifractor(57)-	9.39863e-05	0.000108273	1.97843e-05	2.04451e-05	0.000112667	6.57204e-05	214
Otu0215	26365	Bacteria(100)-Firmicutes(100)-Clostridia(100)-Clostridiales(100)-Lachnospiraceae(100)-Lactonifactor(100)-	0.00468486	0.00318076	0.00313963	0.00112626	0.00632803	0.00353116	215
Otu0216	367	Bacteria(100)-Firmicutes(100)-Clostridia(100)-Clostridiales(100)-Lachnospiraceae(100)-Dorea(100)-	7.35197e-05	6.64906e-05	3.74168e-05	3.25054e-05	4.79067e-05	3.27469e-05	216
Otu0217	2838	Bacteria(100)-Firmicutes(100)-Clostridia(100)-Clostridiales(100)-Ruminococcaceae(100)-Clostridium_III(63)-	0.000916105	0.00101954	0.000343485	0.00043939	0.000296728	0.000200525	217
Otu0218	4558	Bacteria(100)-Firmicutes(100)-Clostridia(100)-Clostridiales(100)-Clostridiales_Incertae_Sedis_XII(100)-Guggenheimella(100)-	0.0013853	0.00343184	0.000333012	0.000499967	0.000240024	0.000207193	218
Otu0219	867	Bacteria(100)-Proteobacteria(100)-Alphaproteobacteria(100)-Rickettsiales(100)-Rickettsiaceae(100)-Orientia(100)-	5.33428e-05	0.000130997	0.000461333	0.00136107	2.03342e-05	4.8692e-05	219
Otu0220	7482	Bacteria(100)-Firmicutes(100)-Clostridia(100)-Clostridiales(100)-Ruminococcaceae(100)-Ruminococcus(100)-	0.00183433	0.00169868	0.000906062	0.000637398	0.00186551	0.00123948	220
Otu0221	873	Bacteria(100)-Firmicutes(100)-Clostridia(100)-Clostridiales(100)-Ruminococcaceae(100)-Papillibacter(54)-	6.98438e-05	6.20749e-05	8.39652e-05	5.48256e-05	0.00015183	0.000154969	221
Otu0222	553	Bacteria(100)-Firmicutes(100)-Clostridia(100)-Clostridiales(100)-Ruminococcaceae(100)-Sporobacter(100)-	9.80359e-05	0.000113568	3.3942e-05	2.62188e-05	0.000149098	0.000166287	222
Otu0223	73282	Bacteria(100)-Firmicutes(100)-Clostridia(100)-Clostridiales(100)-Ruminococcaceae(100)-Ruminococcus(100)-	0.015691	0.0255766	0.0072037	0.00961579	0.00975994	0.0118675	223
Otu0224	10472	Bacteria(100)-Firmicutes(100)-Clostridia(100)-Clostridiales(100)-Lachnospiraceae(100)-Lachnospiracea_incertae_sedis(100)-	0.00145612	0.000909743	0.00192187	0.000882939	0.00217514	0.000894882	224
Otu0225	892	Bacteria(100)-Firmicutes(100)-Clostridia(100)-Clostridiales(100)-Lachnospiraceae(100)-Johnsonella(100)-	0.000172767	0.000281233	1.52814e-05	2.54575e-05	0.000101729	0.00011182	225
Otu0226	539	Bacteria(100)-Firmicutes(100)-Clostridia(100)-Clostridiales(100)-Ruminococcaceae(100)-Ruminococcus(79)-	4.75957e-05	3.36438e-05	6.95303e-05	0.000106857	5.08573e-05	3.57006e-05	226
Otu0227	22943	Bacteria(100)-Bacteroidetes(100)-Bacteroidia(100)-Bacteroidales(100)-Rikenellaceae(100)-Alistipes(100)-	0.00421687	0.00376878	0.00186776	0.00128517	0.00486013	0.00322064	227
Otu0228	486	Bacteria(100)-Firmicutes(100)-Clostridia(100)-Clostridiales(100)-Lachnospiraceae(100)-Coprococcus(77)-	8.2847e-05	3.92259e-05	6.19885e-05	4.63577e-05	7.89106e-05	5.4506e-05	228
Otu0229	1213	Bacteria(100)-Firmicutes(100)-Clostridia(100)-Clostridiales(100)-Lachnospiraceae(100)-Lachnospiracea_incertae_sedis(100)-	0.000517905	0.000734107	0	0	0.000541865	0.000709437	229
Otu0230	54716	Bacteria(100)-Firmicutes(100)-Clostridia(100)-Clostridiales(100)-Ruminococcaceae(100)-Ruminococcus(100)-	0.0128583	0.00537369	0.00663932	0.00640367	0.00725907	0.00377395	230
Otu0231	155	Bacteria(100)-Firmicutes(100)-Clostridia(100)-Clostridiales(100)-Lachnospiraceae(100)-Syntrophococcus(76)-	2.44141e-05	3.20197e-05	1.8843e-05	2.58217e-05	1.82129e-05	2.2696e-05	231
Otu0232	3659	Bacteria(100)-Firmicutes(100)-Clostridia(100)-Clostridiales(100)-Lachnospiraceae(100)-Robinsoniella(51)-	0.000625029	0.000881933	0.000420772	0.000335815	0.000120895	5.90549e-05	232
Otu0233	20113	Bacteria(100)-Firmicutes(100)-Clostridia(100)-Clostridiales(100)-Lachnospiraceae(100)-Lachnobacterium(100)-	0.0031973	0.00506274	0.00136807	0.00158034	0.00571565	0.00922963	233
Otu0234	8357	Bacteria(100)-Firmicutes(100)-Clostridia(100)-Clostridiales(100)-Clostridiales_Incertae_Sedis_XII(100)-Guggenheimella(100)-	5.41666e-06	7.87432e-06	0.00232754	0.00225518	0.00108241	0.00113437	234
Otu0235	1087	Bacteria(100)-Firmicutes(100)-Clostridia(100)-Clostridiales(100)-Lachnospiraceae(100)-Robinsoniella(76)-	0.000222902	0.000235594	0.000164234	0.000185718	0.000138619	9.11049e-05	235
Otu0236	1291	Bacteria(100)-Firmicutes(100)-Clostridia(100)-Clostridiales(100)-Ruminococcaceae(100)-Hydrogenoanaerobacterium(100)-	0.00017276	0.000125807	0.000147118	9.80245e-05	0.000187904	0.000151754	236
Otu0237	416	Bacteria(100)-Firmicutes(100)-Clostridia(100)-Clostridiales(100)-Lachnospiraceae(100)-Butyrivibrio(56)-	3.00965e-05	1.16052e-05	5.69684e-05	5.87023e-05	3.4755e-05	2.68656e-05	237
Otu0238	4864	Bacteria(100)-Synergistetes(100)-Synergistia(100)-Synergistales(100)-Synergistaceae(100)-Jonquetella(100)-	0.000532474	0.000606257	0.000552976	0.000861151	0.000572825	0.000514656	238
Otu0239	6521	Bacteria(100)-Firmicutes(100)-Negativicutes(73)-Selenomonadales(73)-Veillonellaceae(73)-Propionispira(73)-	0.000502166	0.000340116	0.00134023	0.000961281	0.00106761	0.000723641	239
Otu0240	783	Bacteria(100)-Firmicutes(100)-Clostridia(100)-Clostridiales(100)-Lachnospiraceae(100)-Dorea(100)-	0.000109183	0.000107372	3.94605e-05	3.83742e-05	0.000171584	0.000174289	240
Otu0241	21274	Bacteria(100)-Firmicutes(100)-Clostridia(100)-Clostridiales(100)-Ruminococcaceae(100)-Clostridium_IV(100)-	0.00277317	0.00313793	0.0049944	0.00508682	0.00213701	0.00215664	241
Otu0242	4030	Bacteria(100)-Firmicutes(100)-Clostridia(100)-Clostridiales(100)-Gracilibacteraceae(64)-Lutispora(64)-	0.000811872	0.000571753	0.000432685	0.000233387	0.000698284	0.000388801	242
Otu0243	7691	Bacteria(100)-Firmicutes(100)-Clostridia(100)-Clostridiales(100)-Ruminococcaceae(100)-Sporobacter(100)-	0.00180672	0.00143376	0.00102958	0.00114056	0.00112123	0.00233839	243
Otu0244	50909	Bacteria(100)-Firmicutes(100)-Clostridia(98)-Clostridiales(98)-Clostridiales_Incertae_Sedis_XII(98)-Guggenheimella(98)-	0.0075009	0.00831532	0.00781553	0.0054561	0.0044421	0.00257731	244
Otu0245	717	Bacteria(100)-Firmicutes(100)-Clostridia(100)-Clostridiales(100)-Ruminococcaceae(100)-Oscillibacter(100)-	0.000100611	0.000132857	4.6044e-05	4.77862e-05	0.000166511	0.000104261	245
Otu0246	541	Bacteria(100)-Actinobacteria(100)-Actinobacteria(100)-Coriobacteriales(100)-Coriobacteriaceae(100)-Enterorhabdus(100)-	7.07619e-05	5.53526e-05	9.70918e-05	5.03449e-05	0.000107816	8.7204e-05	246
Otu0247	1148	Bacteria(100)-Firmicutes(100)-Clostridia(100)-Clostridiales(100)-Lachnospiraceae(100)-Lachnospiracea_incertae_sedis(100)-	0.000174159	0.000125675	8.24486e-05	7.86586e-05	0.000305467	0.000211832	247
Otu0248	27398	Bacteria(100)-Firmicutes(100)-Clostridia(100)-Clostridiales(100)-Lachnospiraceae(100)-Lachnospiracea_incertae_sedis(100)-	0.00124729	0.00128718	0.00218627	0.00310045	0.00605294	0.00412957	248
Otu0249	2128	Bacteria(100)-Firmicutes(100)-Clostridia(100)-Clostridiales(100)-Lachnospiraceae(100)-Blautia(100)-	8.97115e-05	0.000143645	0.000346554	0.000712393	0.000822025	0.00111518	249
Otu0250	537	Bacteria(100)-Firmicutes(100)-Clostridia(72)-Clostridiales(72)-Clostridiales_Incertae_Sedis_XII(72)-Guggenheimella(72)-	0.000128643	9.07477e-05	6.7063e-05	0.00010777	7.82829e-05	7.50403e-05	250
Otu0251	1200	Bacteria(100)-Firmicutes(100)-Clostridia(100)-Clostridiales(100)-Lachnospiraceae(100)-Blautia(100)-	2.78334e-05	6.02271e-05	0.000271276	0.000581968	0.000576996	0.000986257	251
Otu0252	7511	Bacteria(100)-Firmicutes(100)-Clostridia(100)-Clostridiales(100)-Lachnospiraceae(100)-Clostridium_XlVb(100)-	0.0005316	0.000518243	0.00136181	0.00131391	0.00114897	0.000780727	252
Otu0253	3800	Bacteria(100)-Firmicutes(100)-Clostridia(100)-Clostridiales(100)-Lachnospiraceae(100)-Lachnospiracea_incertae_sedis(78)-	0.000577026	0.000369184	0.000674272	0.000770868	0.000689758	0.00047293	253
Otu0254	760	Bacteria(100)-Firmicutes(100)-Clostridia(100)-Clostridiales(100)-Lachnospiraceae(100)-Lachnospiracea_incertae_sedis(57)-	9.92401e-05	6.85465e-05	0.000115729	5.79322e-05	7.61078e-05	5.28677e-05	254
Otu0255	2469	Bacteria(100)-Firmicutes(100)-Clostridia(100)-Clostridiales(100)-Ruminococcaceae(100)-Sporobacter(87)-	0.000277244	0.000115868	0.00031388	0.000127951	0.000324263	0.000118847	255
Otu0256	63517	Bacteria(100)-Firmicutes(100)-Clostridia(100)-Clostridiales(100)-Ruminococcaceae(100)-Ruminococcus(100)-	0.0104359	0.0109966	0.00793811	0.00969464	0.00493592	0.00348997	256
Otu0257	1567	Bacteria(100)-Firmicutes(100)-Clostridia(100)-Clostridiales(100)-Lachnospiraceae(100)-Clostridium_XlVb(100)-	0.000277332	0.00048342	0.000172762	0.00022484	7.6877e-05	6.53998e-05	257
Otu0258	4556	Bacteria(100)-Bacteroidetes(100)-Bacteroidia(100)-Bacteroidales(100)-Porphyromonadaceae(100)-Butyricimonas(100)-	0.000627259	0.000365156	0.000469845	0.00019857	0.000778155	0.000257345	258
Otu0259	333	Bacteria(100)-Firmicutes(100)-Clostridia(100)-Clostridiales(100)-Lachnospiraceae(100)-Johnsonella(100)-	2.04257e-05	2.07277e-05	2.29744e-05	2.86755e-05	4.84755e-05	5.70802e-05	259
Otu0260	1625	Bacteria(100)-Firmicutes(100)-Clostridia(100)-Clostridiales(100)-Lachnospiraceae(100)-Johnsonella(100)-	4.64402e-05	7.65679e-05	6.87253e-05	0.000113698	0.000741973	0.00152547	260
Otu0261	570	Bacteria(100)-Firmicutes(100)-Clostridia(100)-Clostridiales(100)-Lachnospiraceae(100)-Lachnospiracea_incertae_sedis(69)-	5.32553e-05	4.80697e-05	8.54003e-05	8.41259e-05	6.7781e-05	3.73861e-05	261
Otu0262	295	Bacteria(100)-Firmicutes(100)-Clostridia(100)-Clostridiales(100)-Lachnospiraceae(100)-Lachnospiracea_incertae_sedis(100)-	1.00459e-05	1.30047e-05	7.45945e-05	6.6462e-05	3.82497e-05	6.04522e-05	262
Otu0263	305	Bacteria(100)-Firmicutes(100)-Clostridia(100)-Clostridiales(100)-Lachnospiraceae(100)-Clostridium_XlVb(100)-	3.53404e-05	3.44771e-05	3.32314e-05	2.83712e-05	5.63215e-05	4.40998e-05	263
Otu0264	10329	Bacteria(100)-Firmicutes(100)-Clostridia(100)-Clostridiales(100)-Lachnospiraceae(100)-Lachnospiracea_incertae_sedis(100)-	0.00122335	0.00212894	0.000223258	0.000334679	0.00436262	0.00618096	264
Otu0265	982	Bacteria(100)-Firmicutes(100)-Clostridia(100)-Clostridiales(100)-Lachnospiraceae(100)-Johnsonella(100)-	6.79343e-05	7.50602e-05	6.08771e-05	8.17347e-05	0.000104825	0.000113023	265
Otu0266	53612	Bacteria(100)-Firmicutes(100)-Negativicutes(100)-Selenomonadales(100)-Veillonellaceae(100)-Dendrosporobacter(100)-	0.00566248	0.0074583	0.00923235	0.00817241	0.0123712	0.00784438	266
Otu0267	662	Bacteria(100)-Firmicutes(100)-Clostridia(100)-Clostridiales(100)-Lachnospiraceae(100)-Robinsoniella(100)-	0.000100374	0.000110817	0.000135595	0.000274727	8.19935e-05	8.17919e-05	267
Otu0268	6782	Bacteria(100)-Firmicutes(100)-Clostridia(100)-Clostridiales(100)-Ruminococcaceae(100)-Clostridium_IV(100)-	0.00118519	0.000442879	0.000913281	0.000493656	0.000853964	0.000280825	268
Otu0269	4766	Bacteria(100)-Firmicutes(100)-Clostridia(100)-Clostridiales(100)-Ruminococcaceae(100)-Papillibacter(100)-	0.000633146	0.000375356	0.000966222	0.000460822	0.00026181	0.000138808	269
Otu0270	535	Bacteria(100)-Firmicutes(100)-Clostridia(100)-Clostridiales(100)-Ruminococcaceae(100)-Clostridium_III(100)-	2.39272e-05	3.21498e-05	0.000128633	0.00020073	0.000118036	0.000174478	270
Otu0271	3900	Bacteria(100)-Firmicutes(100)-Clostridia(100)-Clostridiales(100)-Lachnospiraceae(100)-Butyrivibrio(100)-	0.00065924	0.000722418	0.00092634	0.00114847	0.000288095	0.000196857	271
Otu0272	845	Bacteria(100)-Firmicutes(100)-Clostridia(100)-Clostridiales(100)-Ruminococcaceae(100)-Papillibacter(100)-	4.68235e-05	7.62555e-05	0.000104828	0.000234516	8.57665e-05	0.000130945	272
Otu0273	24464	Bacteria(100)-Bacteroidetes(100)-Bacteroidia(100)-Bacteroidales(100)-Porphyromonadaceae(100)-Parabacteroides(100)-	0.00378479	0.00233592	0.0024938	0.00207843	0.0038558	0.00194894	273
Otu0274	353	Bacteria(100)-Firmicutes(100)-Clostridia(100)-Clostridiales(100)-Lachnospiraceae(100)-Johnsonella(100)-	2.36212e-05	3.63657e-05	1.02354e-05	1.42509e-05	0.000170063	0.000174728	274
Otu0275	1859	Bacteria(100)-Bacteroidetes(100)-Bacteroidia(100)-Bacteroidales(100)-Porphyromonadaceae(100)-Barnesiella(100)-	0.000471073	0.000738554	0.000357638	0.000303655	0.000121216	0.00018707	275
Otu0276	15083	Bacteria(100)-Bacteroidetes(100)-Bacteroidia(100)-Bacteroidales(100)-Bacteroidaceae(100)-Bacteroides(100)-	0.000461552	0.000456519	0.00141912	0.00181806	0.00265717	0.00447936	276
Otu0277	23197	Bacteria(100)-Firmicutes(100)-Clostridia(100)-Clostridiales(100)-Lachnospiraceae(100)-Syntrophococcus(100)-	0.00353711	0.00224571	0.00375734	0.00210885	0.00233963	0.00154592	277
Otu0278	3263	Bacteria(100)-Firmicutes(100)-Clostridia(100)-Clostridiales(100)-Lachnospiraceae(100)-Clostridium_XlVa(100)-	0.000134389	0.000114594	3.37704e-05	2.83299e-05	0.00133136	0.00325851	278
Otu0279	101	Bacteria(100)-Firmicutes(100)-Clostridia(100)-Clostridiales(100)-Lachnospiraceae(100)-Lachnospiracea_incertae_sedis(100)-	5.51988e-05	0.00015752	1.53024e-06	3.44036e-06	2.28066e-05	3.30634e-05	279
Otu0280	131	Bacteria(100)-Firmicutes(100)-Clostridia(100)-Clostridiales(100)-Lachnospiraceae(60)-Robinsoniella(60)-	2.97685e-05	5.0288e-05	1.49639e-05	1.78527e-05	1.65037e-05	3.18533e-05	280
Otu0281	61783	Bacteria(100)-Firmicutes(100)-Clostridia(100)-Clostridiales(100)-Lachnospiraceae(100)-Parasporobacterium(100)-	0.0139134	0.011429	0.0130656	0.0130566	0.00739062	0.0023561	281
Otu0282	3800	Bacteria(100)-Firmicutes(100)-Clostridia(100)-Clostridiales(100)-Lachnospiraceae(100)-Lachnospiracea_incertae_sedis(97)-	0.000306704	0.000275391	0.000523543	0.000499069	0.000524174	0.000353438	282
Otu0283	382	Bacteria(100)-Firmicutes(100)-Clostridia(100)-Clostridiales(100)-Lachnospiraceae(100)-Lachnospiracea_incertae_sedis(100)-	4.16981e-05	3.65258e-05	9.31373e-05	0.000113675	1.69219e-05	1.79219e-05	283
Otu0284	6813	Bacteria(100)-Proteobacteria(100)-Alphaproteobacteria(100)-Rickettsiales(100)-Rickettsiaceae(100)-Orientia(100)-	0.000946803	0.00131869	0.000895938	0.00087883	0.00111759	0.000855318	284
Otu0285	3086	Bacteria(100)-Firmicutes(100)-Clostridia(100)-Clostridiales(100)-Lachnospiraceae(100)-Lachnospiracea_incertae_sedis(100)-	0.000367639	0.000232687	0.000609972	0.000688925	0.000299724	0.000203452	285
Otu0286	3122	Bacteria(100)-Firmicutes(100)-Clostridia(100)-Clostridiales(100)-Lachnospiraceae(100)-Coprococcus(89)-	0.000373951	0.0010221	0.000125229	0.000128149	0.000392102	0.000305171	286
Otu0287	3328	Bacteria(100)-Bacteroidetes(93)-Bacteroidia(93)-Bacteroidales(93)-Bacteroidaceae(93)-Anaerorhabdus(93)-	0.000279786	0.000151475	0.000478685	0.000435722	0.000689627	0.000495988	287
Otu0288	1829	Bacteria(100)-Firmicutes(100)-Clostridia(100)-Clostridiales(100)-Lachnospiraceae(100)-Marvinbryantia(100)-	0.00029455	0.000130629	0.000202211	0.000140503	0.00025865	0.000196414	288
Otu0289	2956	Bacteria(100)-Firmicutes(100)-Clostridia(100)-Clostridiales(100)-Lachnospiraceae(100)-Blautia(100)-	0.000413623	0.00069878	0.000466518	0.000662234	0.000830963	0.000981762	289
Otu0290	264	Bacteria(100)-Firmicutes(100)-Clostridia(100)-Clostridiales(100)-Lachnospiraceae(100)-Lachnospiracea_incertae_sedis(75)-	5.56155e-05	0.00013223	2.70068e-05	4.14717e-05	3.1118e-05	5.29444e-05	290
Otu0291	707	Bacteria(100)-Actinobacteria(100)-Actinobacteria(100)-Coriobacteriales(100)-Coriobacteriaceae(100)-Asaccharobacter(100)-	9.19409e-05	7.80366e-05	0.000114471	4.92041e-05	7.49207e-05	3.61697e-05	291
Otu0292	648	Bacteria(100)-Firmicutes(100)-Clostridia(100)-Clostridiales(100)-Clostridiales_Incertae_Sedis_XII(100)-Guggenheimella(100)-	5.23272e-05	4.12769e-05	0.000144642	0.000284689	0.000180094	0.000153072	292
Otu0293	628	Bacteria(100)-Proteobacteria(67)-Alphaproteobacteria(67)-Rickettsiales(67)-Rickettsiaceae(67)-Orientia(67)-	8.71292e-05	5.21256e-05	0.000126891	0.000136182	8.74927e-05	7.93799e-05	293
Otu0294	8342	Bacteria(100)-Proteobacteria(100)-Deltaproteobacteria(100)-Bdellovibrionales(100)-Bdellovibrionaceae(100)-Vampirovibrio(100)-	0.000802055	0.00135537	0.000460358	0.000557878	0.000749898	0.000627394	294
Otu0295	127	Bacteria(100)-Firmicutes(100)-Clostridia(100)-Clostridiales(100)-Clostridiales_Incertae_Sedis_XII(100)-Guggenheimella(100)-	3.34688e-05	8.85446e-05	5.81371e-06	1.08416e-05	1.78776e-05	3.34176e-05	295
Otu0296	1548	Bacteria(100)-Firmicutes(100)-Clostridia(100)-Clostridiales(100)-Ruminococcaceae(100)-Oscillibacter(100)-	0.000187998	0.000314207	0.000107313	0.000191987	0.000219544	0.000267354	296
Otu0297	3466	Bacteria(100)-Firmicutes(100)-Clostridia(100)-Clostridiales(100)-Peptococcaceae_1(100)-Peptococcus(100)-	0.000358046	0.000198401	0.000511779	0.000274191	0.000671207	0.000279828	297
Otu0298	330	Bacteria(100)-Firmicutes(100)-Clostridia(100)-Clostridiales(100)-Ruminococcaceae(100)-Acetanaerobacterium(100)-	5.82669e-05	7.64071e-05	3.43788e-05	3.30604e-05	4.18172e-05	2.64191e-05	298
Otu0299	1309	Bacteria(100)-Firmicutes(100)-Clostridia(100)-Clostridiales(100)-Lachnospiraceae(100)-Clostridium_XlVa(100)-	0.000135252	9.03365e-05	0.000287896	0.000368407	2.2333e-05	2.43203e-05	299
Otu0300	3891	Bacteria(100)-Firmicutes(100)-Clostridia(100)-Clostridiales(100)-Lachnospiraceae(100)-Lachnospiracea_incertae_sedis(100)-	0.00023686	0.000290118	0.000217636	0.000316806	0.000364142	0.000492783	300
Otu0301	4398	Bacteria(100)-Firmicutes(100)-Clostridia(100)-Clostridiales(100)-Clostridiaceae_1(99)-Anaerosporobacter(99)-	0.000359669	0.000363464	0.000199173	0.000207855	0.000401785	0.000291458	301
Otu0302	37183	Bacteria(100)-Bacteroidetes(100)-Bacteroidia(100)-Bacteroidales(100)-Bacteroidaceae(100)-Bacteroides(100)-	0.00294997	0.000961506	0.00828309	0.00540205	0.00408636	0.00189959	302
Otu0303	564	Bacteria(100)-Firmicutes(100)-Clostridia(100)-Clostridiales(100)-Ruminococcaceae(100)-Sporobacter(100)-	9.05194e-05	5.49133e-05	8.5451e-05	5.86012e-05	7.4831e-05	6.05581e-05	303
Otu0304	72	Bacteria(100)-Firmicutes(100)-Clostridia(100)-Clostridiales(100)-Clostridiales_Incertae_Sedis_XII(100)-Guggenheimella(100)-	1.28803e-05	1.94466e-05	7.87602e-06	1.14263e-05	8.04089e-06	1.17111e-05	304
Otu0305	5814	Bacteria(100)-Firmicutes(100)-Erysipelotrichia(95)-Erysipelotrichales(95)-Erysipelotrichaceae(95)-Bulleidia(95)-	0.000652599	0.000752777	0.000795751	0.000992602	0.00150849	0.00160387	305
Otu0306	36022	Bacteria(100)-Proteobacteria(100)-Deltaproteobacteria(100)-Bdellovibrionales(100)-Bdellovibrionaceae(100)-Vampirovibrio(100)-	0.00150792	0.00147838	0.00755676	0.00853757	0.00662654	0.00495953	306
Otu0307	1589	Bacteria(100)-Firmicutes(100)-Clostridia(100)-Clostridiales(100)-Ruminococcaceae(100)-Papillibacter(100)-	0.00010317	0.000167327	0.000131636	0.000137237	0.000199416	0.000109605	307
Otu0308	202	Bacteria(100)-Firmicutes(100)-Clostridia(100)-Clostridiales(100)-Lachnospiraceae(100)-Dorea(92)-	4.18009e-05	1.72435e-05	2.65136e-05	1.77435e-05	3.76626e-05	2.76705e-05	308
Otu0309	384	Bacteria(100)-Firmicutes(100)-Clostridia(100)-Clostridiales(100)-Ruminococcaceae(98)-Acetivibrio(98)-	1.8193e-05	3.0034e-05	4.36238e-05	5.93295e-05	7.53482e-06	1.28707e-05	309
Otu0310	4478	Bacteria(100)-Firmicutes(100)-Clostridia(100)-Clostridiales(100)-Clostridiales_Incertae_Sedis_XIII(100)-Anaerovorax(100)-	0.000924244	0.00136291	0.000371335	0.000595756	0.00210671	0.00279931	310
Otu0311	4899	Bacteria(100)-Firmicutes(100)-Clostridia(100)-Clostridiales(100)-Lachnospiraceae(100)-Acetitomaculum(100)-	0.000503225	0.000537498	0.000756949	0.000521642	0.00111453	0.000955263	311
Otu0312	110	Bacteria(100)-Firmicutes(100)-Clostridia(100)-Clostridiales(100)-Clostridiales_Incertae_Sedis_XII(100)-Guggenheimella(100)-	3.34184e-05	4.26303e-05	8.03729e-06	9.67915e-06	2.38248e-05	3.90763e-05	312
Otu0313	730	Bacteria(100)-Firmicutes(100)-Clostridia(100)-Clostridiales(100)-Lachnospiraceae(100)-Lachnospiracea_incertae_sedis(100)-	7.71676e-05	0.000132096	0.000126677	0.000316402	6.06797e-05	0.000103803	313
Otu0314	74	Bacteria(100)-Firmicutes(100)-Clostridia(100)-Clostridiales(100)-Lachnospiraceae(100)-Blautia(53)-	1.21635e-05	1.62222e-05	8.78295e-06	1.13984e-05	3.62006e-06	7.18674e-06	314
Otu0315	625	Bacteria(100)-Firmicutes(100)-Clostridia(100)-Clostridiales(100)-Lachnospiraceae(100)-Lachnospiracea_incertae_sedis(100)-	9.19523e-05	0.000128658	4.3122e-05	6.3641e-05	0.000222637	0.00042744	315
Otu0316	1924	Bacteria(100)-Firmicutes(100)-Clostridia(100)-Clostridiales(100)-Lachnospiraceae(100)-Marvinbryantia(100)-	0.00013802	0.000156252	0.000431596	0.000609263	0.000234639	0.000302237	316
Otu0317	139	Bacteria(100)-Firmicutes(100)-Clostridia(100)-Clostridiales(100)-Lachnospiraceae(100)-Acetitomaculum(100)-	3.42812e-05	0.000102201	1.14868e-05	2.27021e-05	5.84449e-05	0.00010233	317
Otu0318	5683	Bacteria(100)-Firmicutes(100)-Clostridia(100)-Clostridiales(100)-Lachnospiraceae(100)-Lachnospiracea_incertae_sedis(100)-	9.55913e-05	0.000241425	0.000173665	0.000222136	4.67455e-05	0.000121419	318
Otu0319	21739	Bacteria(100)-Firmicutes(100)-Clostridia(100)-Clostridiales(100)-Ruminococcaceae(100)-Ruminococcus(100)-	0.000194545	0.000158457	0.00391	0.00480013	0.00205057	0.00265604	319
Otu0320	374	Bacteria(100)-Actinobacteria(100)-Actinobacteria(100)-Coriobacteriales(100)-Coriobacteriaceae(100)-Asaccharobacter(71)-	4.1625e-05	2.94425e-05	4.03807e-05	6.7206e-05	5.12358e-05	3.80426e-05	320
Otu0321	918	Bacteria(100)-Firmicutes(100)-Erysipelotrichia(100)-Erysipelotrichales(100)-Erysipelotrichaceae(100)-Catenibacterium(74)-	7.59009e-05	4.64008e-05	0.000221124	0.000201811	9.00213e-05	8.52937e-05	321
Otu0322	5644	Bacteria(100)-Firmicutes(100)-Clostridia(100)-Clostridiales(100)-Lachnospiraceae(100)-Lachnospiracea_incertae_sedis(100)-	0.000582829	0.000461821	0.000423722	0.000353933	0.000968585	0.000588771	322
Otu0323	1072	Bacteria(100)-Actinobacteria(100)-Actinobacteria(100)-Actinomycetales(100)-Micrococcaceae(100)-Rothia(100)-	0.000173701	0.000147834	0.00016502	8.95505e-05	0.000126199	6.54501e-05	323
Otu0324	6109	Bacteria(100)-Firmicutes(100)-Clostridia(100)-Clostridiales(100)-Ruminococcaceae(100)-Sporobacter(100)-	0.00066634	0.000360631	0.00100789	0.000804265	0.000578907	0.000355988	324
Otu0325	841	Bacteria(100)-Firmicutes(100)-Clostridia(100)-Clostridiales(100)-Lachnospiraceae(100)-Johnsonella(100)-	6.52861e-05	7.55899e-05	6.22137e-05	8.57785e-05	6.23893e-05	4.05858e-05	325
Otu0326	10537	Bacteria(100)-Bacteroidetes(100)-Bacteroidia(100)-Bacteroidales(100)-Porphyromonadaceae(100)-Tannerella(100)-	0.00144445	0.00107881	0.0017562	0.000978775	0.0013315	0.000516354	326
Otu0327	852	Bacteria(100)-Firmicutes(100)-Clostridia(100)-Clostridiales(100)-Ruminococcaceae(100)-Clostridium_III(100)-	0.000140603	8.38255e-05	0.000131616	0.000115881	7.22093e-05	4.4926e-05	327
Otu0328	3086	Bacteria(100)-Firmicutes(100)-Clostridia(100)-Clostridiales(100)-Ruminococcaceae(100)-Sporobacter(100)-	0.000459109	0.000175776	0.000365644	0.000157314	0.000352995	9.61677e-05	328
Otu0329	168	Bacteria(100)-Firmicutes(100)-Clostridia(100)-Clostridiales(100)-Ruminococcaceae(100)-Anaerotruncus(89)-	2.64455e-05	2.10516e-05	1.15053e-05	1.11038e-05	3.72377e-05	3.35537e-05	329
Otu0330	297	Bacteria(100)-Firmicutes(100)-Clostridia(100)-Clostridiales(100)-Ruminococcaceae(100)-Flavonifractor(100)-	4.1207e-05	3.73598e-05	2.76335e-05	1.92948e-05	5.21077e-05	3.37928e-05	330
Otu0331	6770	Bacteria(100)-Firmicutes(100)-Clostridia(100)-Clostridiales(100)-Lachnospiraceae(100)-Lachnospiracea_incertae_sedis(100)-	0.000822107	0.000917243	0.000628158	0.00131056	0.00113896	0.00130689	331
Otu0332	12768	Bacteria(100)-Firmicutes(100)-Clostridia(100)-Clostridiales(100)-Ruminococcaceae(78)-Ethanoligenens(55)-	0.00290214	0.00327635	0.000900467	0.000868913	0.000849653	0.0011011	332
Otu0333	1018	Bacteria(100)-Firmicutes(100)-Clostridia(100)-Clostridiales(100)-Lachnospiraceae(100)-Clostridium_XlVa(84)-	0.000185789	0.000150562	0.000257002	0.000167811	0.000161463	8.2471e-05	333
Otu0334	1271	Bacteria(100)-Firmicutes(100)-Clostridia(100)-Clostridiales(100)-Clostridiales_Incertae_Sedis_XII(99)-Fusibacter(99)-	0.000367295	0.000384903	5.17053e-05	4.47983e-05	0.000183691	0.000159404	334
Otu0335	315	Bacteria(100)-Firmicutes(100)-Clostridia(100)-Clostridiales(100)-Lachnospiraceae(100)-Lachnobacterium(100)-	3.4556e-05	2.85879e-05	5.70097e-05	5.84397e-05	4.09489e-05	3.26738e-05	335
Otu0336	12573	Bacteria(100)-Firmicutes(100)-Clostridia(100)-Clostridiales(100)-Ruminococcaceae(100)-Clostridium_IV(100)-	0.00135481	0.00272984	0.00163006	0.0021083	0.00307339	0.00409381	336
Otu0337	9541	Bacteria(100)-Proteobacteria(100)-Deltaproteobacteria(100)-Bdellovibrionales(100)-Bdellovibrionaceae(100)-Vampirovibrio(100)-	0.00155403	0.00207497	0.00120137	0.000813254	0.00264573	0.00172411	337
Otu0338	515	Bacteria(100)-Firmicutes(100)-Clostridia(100)-Clostridiales(100)-Ruminococcaceae(100)-Anaerotruncus(100)-	8.38963e-05	6.81158e-05	5.33705e-05	6.34045e-05	7.68729e-05	6.76927e-05	338
Otu0339	5953	Bacteria(100)-Firmicutes(100)-Clostridia(100)-Clostridiales(100)-Lachnospiraceae(100)-Lachnospiracea_incertae_sedis(99)-	0.000148616	0.000242053	0.000440886	0.000633636	0.000561574	0.00101813	339
Otu0340	6004	Bacteria(100)-Bacteroidetes(100)-Bacteroidia(100)-Bacteroidales(100)-Porphyromonadaceae(100)-Barnesiella(100)-	0.000830476	0.00124679	0.00070942	0.000515151	0.000242898	0.000331458	340
Otu0341	1262	Bacteria(100)-Firmicutes(100)-Clostridia(100)-Clostridiales(100)-Clostridiales_Incertae_Sedis_XII(100)-Guggenheimella(100)-	3.09631e-05	5.40518e-05	0.000147692	0.000313352	9.16197e-05	0.000150489	341
Otu0342	1864	Bacteria(100)-Firmicutes(100)-Clostridia(100)-Clostridiales(100)-Eubacteriaceae(100)-Alkalibacter(100)-	0.000184639	0.000109152	0.000404927	0.000229161	0.000212214	8.60819e-05	342
Otu0343	585	Bacteria(100)-Firmicutes(100)-Clostridia(100)-Clostridiales(100)-Lachnospiraceae(100)-Lachnospiracea_incertae_sedis(51)-	2.3468e-05	3.691e-05	3.34256e-05	3.75363e-05	4.9304e-05	8.23364e-05	343
Otu0344	3541	Bacteria(100)-Firmicutes(100)-Clostridia(100)-Clostridiales(100)-Ruminococcaceae(100)-Clostridium_IV(100)-	0.000303989	0.00044127	0.000767713	0.000996256	0.000377546	0.000960249	344
Otu0345	129	Bacteria(100)-Firmicutes(100)-Clostridia(100)-Clostridiales(100)-Clostridiales_Incertae_Sedis_XII(100)-Guggenheimella(100)-	4.87357e-05	4.15403e-05	5.90752e-06	8.19869e-06	1.76932e-05	3.82824e-05	345
Otu0346	129	Bacteria(100)-Firmicutes(100)-Clostridia(100)-Clostridiales(100)-Lachnospiraceae(100)-Clostridium_XlVa(100)-	8.62599e-06	1.17942e-05	1.53509e-05	2.82895e-05	1.54604e-05	1.99505e-05	346
Otu0347	269	Bacteria(100)-Firmicutes(100)-Clostridia(100)-Clostridiales(100)-Ruminococcaceae(100)-Clostridium_IV(53)-	2.37969e-05	1.31994e-05	3.43675e-05	6.55832e-05	5.75999e-05	5.31854e-05	347
Otu0348	1822	Bacteria(100)-Firmicutes(100)-Clostridia(100)-Clostridiales(100)-Lachnospiraceae(100)-Marvinbryantia(94)-	0.00028646	0.000817848	0.000228062	0.000432405	0.000721467	0.000681973	348
Otu0349	1109	Bacteria(100)-Firmicutes(100)-Clostridia(100)-Clostridiales(100)-Lachnospiraceae(100)-Clostridium_XlVa(100)-	0.000264769	0.000241148	3.28693e-05	3.6776e-05	0.000313978	0.000228012	349
Otu0350	430	Bacteria(100)-Firmicutes(100)-Clostridia(100)-Clostridiales(100)-Lachnospiraceae(100)-Lachnospiracea_incertae_sedis(100)-	7.4092e-06	7.88638e-06	2.08368e-05	3.34424e-05	1.51037e-05	2.3325e-05	350
Otu0351	372	Bacteria(100)-Firmicutes(100)-Clostridia(100)-Clostridiales(100)-Lachnospiraceae(100)-Robinsoniella(100)-	3.39286e-05	3.96257e-05	4.67156e-05	2.83905e-05	5.65432e-05	4.05383e-05	351
Otu0352	1836	Bacteria(100)-Firmicutes(100)-Clostridia(100)-Clostridiales(100)-Ruminococcaceae(100)-Oscillibacter(100)-	0.000141818	0.000106953	0.00017242	0.000104499	0.00034591	0.000185782	352
Otu0353	1513	Bacteria(100)-Firmicutes(100)-Clostridia(100)-Clostridiales(100)-Lachnospiraceae(100)-Clostridium_XlVa(99)-	0.000159679	0.000265394	0.000192613	0.00026496	5.28097e-05	5.12528e-05	353
Otu0354	242	Bacteria(100)-Firmicutes(100)-Clostridia(100)-Clostridiales(100)-Lachnospiraceae(100)-Acetitomaculum(100)-	0.000102009	0.000100284	0	0	0.000111261	8.67133e-05	354
Otu0355	406	Bacteria(100)-Firmicutes(100)-Clostridia(100)-Clostridiales(100)-Ruminococcaceae(100)-Saccharofermentans(100)-	8.69656e-05	0.000107918	1.83633e-05	2.44381e-05	7.24005e-05	4.9826e-05	355
Otu0356	139	Bacteria(100)-Firmicutes(100)-Clostridia(100)-Clostridiales(100)-Clostridiales_Incertae_Sedis_XI(100)-Sporanaerobacter(100)-	2.00565e-05	1.6447e-05	2.24202e-05	2.46527e-05	1.76502e-05	2.70701e-05	356
Otu0357	178	Bacteria(100)-Firmicutes(100)-Clostridia(100)-Clostridiales(100)-Ruminococcaceae(100)-Faecalibacterium(100)-	1.59037e-05	1.96096e-05	1.95103e-05	1.55343e-05	2.50439e-05	2.43972e-05	357
Otu0358	933	Bacteria(100)-Firmicutes(100)-Clostridia(100)-Clostridiales(100)-Ruminococcaceae(100)-Acetanaerobacterium(100)-	0.000154063	0.000134096	0.000172116	0.000100885	0.000135871	9.2748e-05	358
Otu0359	9835	Bacteria(100)-Bacteroidetes(100)-Bacteroidia(100)-Bacteroidales(100)-Porphyromonadaceae(100)-Tannerella(100)-	0.00118272	0.00146133	0.00223294	0.00153443	0.0014711	0.00099141	359
Otu0360	2297	Bacteria(100)-Firmicutes(100)-Clostridia(100)-Clostridiales(100)-Ruminococcaceae(100)-Ruminococcus(100)-	0.000266996	0.000323632	0.000481883	0.000185309	0.000283544	0.000198743	360
Otu0361	480	Bacteria(100)-Proteobacteria(100)-Alphaproteobacteria(100)-Rickettsiales(100)-Rickettsiaceae(100)-Orientia(100)-	0.000134318	0.000265458	4.05497e-05	6.81314e-05	6.50917e-05	8.15948e-05	361
Otu0362	327	Bacteria(100)-Firmicutes(100)-Clostridia(100)-Clostridiales(100)-Clostridiales_Incertae_Sedis_XIII(100)-Anaerovorax(100)-	0	0	2.95418e-05	9.34194e-05	5.76302e-06	1.72891e-05	362
Otu0363	676	Bacteria(100)-Firmicutes(100)-Clostridia(100)-Clostridiales(100)-Lachnospiraceae(100)-Clostridium_XlVa(100)-	4.98026e-05	6.99212e-05	0.000159535	0.000235889	9.7829e-05	6.41887e-05	363
Otu0364	508	Bacteria(100)-Firmicutes(100)-Clostridia(100)-Clostridiales(100)-Ruminococcaceae(100)-Clostridium_IV(100)-	4.11839e-05	6.85985e-05	3.36591e-05	7.16457e-05	0.000112585	0.000190002	364
Otu0365	641	Bacteria(100)-Firmicutes(100)-Clostridia(100)-Clostridiales(100)-Peptococcaceae_1(100)-Desulfitibacter(100)-	0.000122993	4.08632e-05	8.95038e-05	4.13395e-05	9.29376e-05	3.84666e-05	365
Otu0366	692	Bacteria(100)-Firmicutes(100)-Clostridia(100)-Clostridiales(100)-Clostridiaceae_1(100)-Anaerosporobacter(100)-	1.22096e-05	1.63011e-05	1.91414e-05	3.2314e-05	6.88503e-05	0.000106136	366
Otu0367	162	Bacteria(100)-Proteobacteria(100)-Alphaproteobacteria(100)-Rickettsiales(100)-Rickettsiaceae(100)-Orientia(100)-	2.0861e-05	2.31277e-05	4.24344e-05	4.18189e-05	1.00505e-05	1.77e-05	367
Otu0368	35918	Bacteria(100)-Bacteroidetes(100)-Bacteroidia(100)-Bacteroidales(100)-Porphyromonadaceae(100)-Tannerella(100)-	0.00481436	0.00324187	0.00644364	0.00477027	0.00621046	0.0032773	368
Otu0369	155	Bacteria(100)-Firmicutes(100)-Clostridia(100)-Clostridiales(100)-Clostridiaceae_4(100)-Caminicella(100)-	2.26313e-05	2.06691e-05	2.8757e-05	2.73731e-05	2.15279e-05	2.48606e-05	369
Otu0370	372	Bacteria(100)-Firmicutes(100)-Clostridia(100)-Clostridiales(100)-Lachnospiraceae(100)-Lachnospiracea_incertae_sedis(100)-	4.45678e-05	5.8101e-05	4.08295e-05	8.4636e-05	0.00015734	0.000360524	370
Otu0371	1029	Bacteria(100)-Proteobacteria(100)-Alphaproteobacteria(100)-Rhizobiales(100)-Hyphomicrobiaceae(100)-Gemmiger(100)-	5.74183e-05	0.000109879	3.271e-05	5.14112e-05	0.000240289	0.000296218	371
Otu0372	104	Bacteria(100)-Firmicutes(100)-Clostridia(100)-Clostridiales(100)-Clostridiaceae_4(63)-Geosporobacter(63)-	1.32544e-05	8.87397e-06	2.06526e-05	1.77636e-05	1.13461e-05	1.23903e-05	372
Otu0373	32	Bacteria(100)-Firmicutes(100)-Clostridia(100)-Clostridiales(100)-Lachnospiraceae(100)-Robinsoniella(100)-	1.43786e-05	1.96924e-05	5.11561e-07	1.6177e-06	5.28279e-06	1.58484e-05	373
Otu0374	92	Bacteria(100)-Firmicutes(100)-Clostridia(100)-Clostridiales(100)-Lachnospiraceae(100)-Lachnospiracea_incertae_sedis(100)-	1.16489e-06	2.45609e-06	5.84574e-06	8.5906e-06	1.96895e-06	3.91979e-06	374
Otu0375	32	Bacteria(100)-Firmicutes(100)-Clostridia(100)-Clostridiales(100)-Lachnospiraceae(100)-Lachnospiracea_incertae_sedis(100)-	1.47973e-06	4.67931e-06	2.24629e-06	4.76114e-06	9.55193e-06	1.89766e-05	375
Otu0376	289	Bacteria(100)-Firmicutes(100)-Clostridia(100)-Clostridiales(100)-Lachnospiraceae(100)-Lachnospiracea_incertae_sedis(100)-	6.74615e-05	0.000185777	2.60679e-05	4.06857e-05	6.5656e-05	0.000109536	376
Otu0377	3672	Bacteria(100)-Firmicutes(100)-Clostridia(100)-Clostridiales(100)-Lachnospiraceae(100)-Lachnospiracea_incertae_sedis(100)-	0.00142186	0.00164963	0	0	0.00178279	0.00260572	377
Otu0378	146	Bacteria(100)-Proteobacteria(100)-Alphaproteobacteria(100)-Rickettsiales(100)-Rickettsiaceae(100)-Orientia(100)-	2.5107e-05	3.72959e-05	2.53234e-05	2.09193e-05	1.58288e-05	2.73519e-05	378
Otu0379	75	Bacteria(100)-Firmicutes(100)-Clostridia(100)-Clostridiales(100)-Ruminococcaceae(100)-Clostridium_III(100)-	1.24344e-05	1.34817e-05	1.23031e-05	1.37073e-05	1.04073e-05	1.03327e-05	379
Otu0380	187	Bacteria(100)-Firmicutes(100)-Clostridia(100)-Clostridiales(100)-Lachnospiraceae(100)-Dorea(100)-	2.24319e-05	1.69378e-05	2.12146e-05	2.43633e-05	1.60464e-05	1.30151e-05	380
Otu0381	875	Bacteria(100)-Firmicutes(100)-Clostridia(100)-Clostridiales(100)-Ruminococcaceae(100)-Clostridium_IV(100)-	0.000214741	0.000233219	9.47805e-05	5.00432e-05	8.87812e-05	0.000110503	381
Otu0382	388	Bacteria(100)-Firmicutes(100)-Clostridia(100)-Clostridiales(100)-Lachnospiraceae(100)-Butyrivibrio(95)-	6.37285e-05	6.51853e-05	3.38924e-05	3.3308e-05	3.31301e-05	3.56178e-05	382
Otu0383	240	Bacteria(100)-Firmicutes(100)-Clostridia(100)-Clostridiales(100)-Lachnospiraceae(100)-Lachnospiracea_incertae_sedis(100)-	1.87022e-05	2.69969e-05	1.10867e-05	1.42164e-05	2.67089e-05	6.00331e-05	383
Otu0384	1738	Bacteria(100)-Firmicutes(100)-Clostridia(100)-Clostridiales(100)-Lachnospiraceae(100)-Lachnospiracea_incertae_sedis(100)-	7.19675e-05	9.30008e-05	0.000222605	0.000287536	0.000341687	0.000306068	384
Otu0385	3035	Bacteria(100)-Firmicutes(100)-Clostridia(100)-Clostridiales(100)-Lachnospiraceae(100)-Robinsoniella(100)-	0.000359471	0.000640409	0.000577066	0.000619671	0.000446164	0.000355013	385
Otu0386	2335	Bacteria(100)-Firmicutes(100)-Clostridia(100)-Clostridiales(100)-Clostridiales_Incertae_Sedis_XII(100)-Guggenheimella(100)-	0.000366063	0.000304058	0.000366808	0.000228311	0.000341598	0.000110453	386
Otu0387	605	Bacteria(100)-Firmicutes(100)-Clostridia(100)-Clostridiales(100)-Lachnospiraceae(100)-Syntrophococcus(100)-	4.89056e-05	3.61491e-05	7.63375e-05	5.33386e-05	0.000128779	8.88592e-05	387
Otu0388	619	Bacteria(100)-Firmicutes(100)-Clostridia(100)-Clostridiales(100)-Lachnospiraceae(100)-Lachnospiracea_incertae_sedis(100)-	9.08628e-05	0.000139707	0.000200658	0.00029171	3.97566e-05	3.23075e-05	388
Otu0389	2105	Bacteria(100)-Firmicutes(100)-Clostridia(100)-Clostridiales(100)-Peptococcaceae_2(100)-Desulfurispora(100)-	0.000420811	0.000251625	0.000344533	0.000112168	0.000227267	8.24886e-05	389
Otu0390	77	Bacteria(100)-Firmicutes(100)-Clostridia(100)-Clostridiales(100)-Clostridiaceae_1(82)-Anaerosporobacter(82)-	7.07069e-06	8.79282e-06	7.01773e-06	8.45041e-06	1.38235e-05	2.39437e-05	390
Otu0391	7445	Bacteria(100)-Firmicutes(100)-Clostridia(100)-Clostridiales(100)-Ruminococcaceae(100)-Ruminococcus(100)-	0.000960439	0.000589303	0.00171118	0.00147762	0.0010853	0.000861991	391
Otu0392	291	Bacteria(100)-Firmicutes(100)-Clostridia(100)-Clostridiales(100)-Clostridiaceae_1(100)-Anaerosporobacter(100)-	3.79139e-05	3.18638e-05	3.34995e-05	2.49464e-05	4.2045e-05	3.1315e-05	392
Otu0393	200	Bacteria(100)-Firmicutes(100)-Clostridia(100)-Clostridiales(100)-Eubacteriaceae(59)-Alkalibacter(59)-	1.91276e-05	1.59416e-05	2.66493e-05	3.1099e-05	4.68388e-05	7.88169e-05	393
Otu0394	463	Bacteria(100)-Firmicutes(100)-Clostridia(100)-Clostridiales(100)-Ruminococcaceae(100)-Ethanoligenens(100)-	6.29559e-05	6.85871e-05	4.6253e-05	3.31966e-05	4.39607e-05	4.06819e-05	394
Otu0395	98	Bacteria(100)-Firmicutes(100)-Clostridia(100)-Clostridiales(100)-Lachnospiraceae(100)-Marvinbryantia(100)-	1.48977e-05	2.31869e-05	1.75306e-05	1.58611e-05	2.74352e-05	2.58118e-05	395
Otu0396	373	Bacteria(100)-Firmicutes(100)-Clostridia(100)-Clostridiales(100)-Lachnospiraceae(100)-Clostridium_XlVa(100)-	3.76585e-05	8.73968e-05	2.68827e-05	3.19663e-05	5.13938e-05	3.85238e-05	396
Otu0397	4062	Bacteria(100)-Actinobacteria(100)-Actinobacteria(100)-Coriobacteriales(100)-Coriobacteriaceae(100)-Paraeggerthella(100)-	0.000706351	0.000567374	0.000724404	0.00085511	0.000377287	0.000248412	397
Otu0398	588	Bacteria(100)-Firmicutes(100)-Clostridia(100)-Clostridiales(100)-Lachnospiraceae(100)-Dorea(100)-	1.66217e-05	2.35267e-05	0.000192153	0.000154071	3.62046e-05	4.57025e-05	398
Otu0399	522	Bacteria(100)-Firmicutes(100)-Clostridia(100)-Clostridiales(100)-Ruminococcaceae(100)-Anaerotruncus(100)-	5.01275e-05	4.35192e-05	6.64724e-05	3.16733e-05	6.28035e-05	4.87788e-05	399
Otu0400	192	Bacteria(100)-Firmicutes(100)-Clostridia(100)-Clostridiales(100)-Lachnospiraceae(100)-Lachnospiracea_incertae_sedis(62)-	9.62581e-06	1.45324e-05	1.35806e-05	1.94755e-05	1.79625e-05	4.39129e-05	400
Otu0401	1032	Bacteria(100)-Firmicutes(100)-Clostridia(100)-Clostridiales(100)-Lachnospiraceae(100)-Acetitomaculum(100)-	8.7101e-05	6.26195e-05	8.28022e-05	8.42433e-05	0.00012817	9.96136e-05	401
Otu0402	3244	Bacteria(100)-Firmicutes(100)-Clostridia(100)-Clostridiales(100)-Clostridiales_Incertae_Sedis_XII(100)-Guggenheimella(100)-	0.000219477	0.000276632	0.000299773	0.00041019	0.00133746	0.00188956	402
Otu0403	499	Bacteria(100)-Firmicutes(100)-Clostridia(100)-Clostridiales(100)-Lachnospiraceae(100)-Roseburia(92)-	0.000145275	0.000135714	0.00010112	0.000123758	6.1549e-05	6.78112e-05	403
Otu0404	6169	Bacteria(100)-Bacteroidetes(100)-Bacteroidia(100)-Bacteroidales(100)-Rikenellaceae(100)-Alistipes(100)-	0.00071912	0.000425964	0.000907934	0.000427817	0.000883011	0.000363089	404
Otu0405	325	Bacteria(100)-Firmicutes(100)-Clostridia(100)-Clostridiales(100)-Ruminococcaceae(100)-Hydrogenoanaerobacterium(100)-	3.46642e-05	4.84143e-05	2.9942e-05	2.11055e-05	2.79484e-05	2.42214e-05	405
Otu0406	1470	Bacteria(100)-Firmicutes(100)-Clostridia(100)-Clostridiales(100)-Lachnospiraceae(100)-Lachnospiracea_incertae_sedis(100)-	0.000165664	0.000177493	0.000149454	0.000169758	0.000191066	0.000132988	406
Otu0407	95	Bacteria(100)-Firmicutes(100)-Clostridia(100)-Clostridiales(100)-Lachnospiraceae(100)-Clostridium_XlVa(100)-	3.30373e-06	6.44939e-06	1.22584e-05	1.50037e-05	8.43911e-06	1.43942e-05	407
Otu0408	4929	Bacteria(100)-Bacteroidetes(100)-Bacteroidia(100)-Bacteroidales(100)-Porphyromonadaceae(100)-Barnesiella(100)-	0.000404683	0.000378734	0.000988844	0.000391136	0.000378468	0.000152741	408
Otu0409	25	Bacteria(100)-Firmicutes(100)-Clostridia(100)-Clostridiales(100)-Lachnospiraceae(100)-Clostridium_XlVa(100)-	3.35654e-06	7.07943e-06	4.02902e-06	5.27452e-06	1.96981e-06	3.90905e-06	409
Otu0410	139	Bacteria(100)-Firmicutes(100)-Clostridia(100)-Clostridiales(100)-Clostridiales_Incertae_Sedis_XII(100)-Guggenheimella(100)-	4.61799e-05	0.000106663	5.38709e-05	0.000143594	3.89797e-05	6.63278e-05	410
Otu0411	10516	Bacteria(100)-Firmicutes(100)-Clostridia(100)-Clostridiales(100)-Lachnospiraceae(100)-Lachnospiracea_incertae_sedis(97)-	0.000181565	0.000231027	0.00124518	0.0023897	0.0011355	0.00170523	411
Otu0412	1225	Bacteria(100)-Firmicutes(100)-Clostridia(100)-Clostridiales(100)-Ruminococcaceae(100)-Papillibacter(100)-	0.000150306	0.000130062	0.000132558	5.96632e-05	7.53427e-05	5.86182e-05	412
Otu0413	69	Bacteria(100)-Firmicutes(100)-Clostridia(100)-Clostridiales(100)-Lachnospiraceae(100)-Robinsoniella(100)-	2.99152e-05	4.41626e-05	2.63015e-06	4.57042e-06	1.44097e-05	2.07259e-05	413
Otu0414	2807	Bacteria(100)-Firmicutes(100)-Clostridia(100)-Clostridiales(100)-Lachnospiraceae(100)-Clostridium_XlVa(100)-	0.000472211	0.000716409	0.000250203	0.000326072	0.000280561	0.000218149	414
Otu0415	1138	Bacteria(100)-Firmicutes(100)-Clostridia(100)-Clostridiales(100)-Lachnospiraceae(100)-Johnsonella(100)-	7.99401e-05	6.0882e-05	0.000145531	0.000104227	0.000115031	0.000107707	415
Otu0416	198	Bacteria(100)-Firmicutes(100)-Clostridia(100)-Clostridiales(100)-Lachnospiraceae(100)-Blautia(100)-	4.46461e-06	1.07083e-05	5.80691e-05	0.000122333	1.14264e-05	2.32488e-05	416
Otu0417	96	Bacteria(100)-Firmicutes(100)-Clostridia(100)-Clostridiales(100)-Lachnospiraceae(100)-Marvinbryantia(100)-	2.76464e-05	5.45481e-05	1.84326e-06	5.8289e-06	1.9851e-05	4.19433e-05	417
Otu0418	3282	Bacteria(100)-Firmicutes(100)-Clostridia(100)-Clostridiales(100)-Clostridiales_Incertae_Sedis_XIII(100)-Anaerovorax(100)-	0.000365095	0.000246404	0.000427539	0.000199959	0.000543855	0.000136738	418
Otu0419	101	Bacteria(100)-Firmicutes(100)-Clostridia(100)-Clostridiales(100)-Lachnospiraceae(100)-Blautia(100)-	1.09158e-05	3.45187e-05	2.67845e-05	4.20185e-05	2.10857e-05	4.09693e-05	419
Otu0420	523	Bacteria(100)-Firmicutes(100)-Clostridia(100)-Clostridiales(100)-Lachnospiraceae(100)-Clostridium_XlVb(100)-	4.15567e-05	1.92101e-05	7.02038e-05	5.17841e-05	0.000116783	4.07455e-05	420
Otu0421	136	Bacteria(100)-Firmicutes(80)-Clostridia(80)-Clostridiales(80)-Clostridiales_Incertae_Sedis_XII(80)-Guggenheimella(80)-	2.01396e-05	3.6273e-05	1.53617e-05	2.91864e-05	3.79566e-05	4.245e-05	421
Otu0422	660	Bacteria(100)-Firmicutes(100)-Clostridia(100)-Clostridiales(100)-Lachnospiraceae(100)-Shuttleworthia(54)-	4.1592e-05	4.06696e-05	7.28385e-05	8.05325e-05	0.000107829	9.14165e-05	422
Otu0423	157	Bacteria(100)-Firmicutes(100)-Clostridia(100)-Clostridiales(100)-Clostridiaceae_1(100)-Anaerosporobacter(100)-	6.16233e-05	7.87379e-05	8.13168e-06	2.57146e-05	5.03164e-05	4.91746e-05	423
Otu0424	903	Bacteria(100)-Firmicutes(100)-Clostridia(100)-Clostridiales(100)-Peptostreptococcaceae(64)-Acetoanaerobium(64)-	0.000115954	0.000190848	0.00018144	0.000404927	1.04255e-05	2.86119e-05	424
Otu0425	848	Bacteria(100)-Firmicutes(100)-Negativicutes(100)-Selenomonadales(100)-Veillonellaceae(100)-Dendrosporobacter(100)-	0.000163806	0.00012562	6.9262e-05	7.17411e-05	9.10954e-05	9.24448e-05	425
Otu0426	895	Bacteria(100)-Firmicutes(100)-Clostridia(100)-Clostridiales(100)-Ruminococcaceae(100)-Pseudoflavonifractor(100)-	0.000142159	0.000176614	5.78951e-05	3.61608e-05	0.000192578	6.27853e-05	426
Otu0427	481	Bacteria(100)-Firmicutes(100)-Clostridia(100)-Clostridiales(100)-Lachnospiraceae(100)-Clostridium_XlVb(100)-	6.53822e-05	7.00119e-05	8.95982e-05	8.62287e-05	7.01685e-05	4.65559e-05	427
Otu0428	5860	Bacteria(100)-Firmicutes(100)-Clostridia(100)-Clostridiales(100)-Ruminococcaceae(100)-Sporobacter(100)-	0.00141695	0.00134805	0.00119531	0.00147584	0.000341764	0.000329757	428
Otu0429	132	Bacteria(100)-Firmicutes(100)-Clostridia(100)-Clostridiales(100)-Lachnospiraceae(54)-Syntrophococcus(54)-	3.69814e-05	7.46312e-05	2.18498e-05	4.47783e-05	0	0	429
Otu0430	410	Bacteria(100)-Firmicutes(100)-Clostridia(100)-Clostridiales(100)-Lachnospiraceae(100)-Lachnospiracea_incertae_sedis(79)-	5.02431e-05	3.69281e-05	6.31819e-05	4.37071e-05	3.08704e-05	4.08805e-05	430
Otu0431	896	Bacteria(100)-Firmicutes(100)-Clostridia(100)-Clostridiales(100)-Lachnospiraceae(100)-Marvinbryantia(100)-	0.000279091	0.000341603	6.2265e-05	4.43979e-05	0.00014832	8.45542e-05	431
Otu0432	291	Bacteria(100)-Firmicutes(100)-Erysipelotrichia(100)-Erysipelotrichales(100)-Erysipelotrichaceae(100)-Clostridium_XVIII(87)-	2.14799e-05	5.05632e-05	5.77121e-05	0.000108905	7.90178e-05	0.000113448	432
Otu0433	131	Bacteria(100)-Firmicutes(100)-Clostridia(100)-Clostridiales(100)-Ruminococcaceae(100)-Clostridium_IV(100)-	1.15149e-05	1.12992e-05	7.96924e-06	7.81201e-06	2.16508e-05	1.90364e-05	433
Otu0434	126	Bacteria(100)-Firmicutes(100)-Bacilli(100)-Lactobacillales(100)-Enterococcaceae(78)-Enterococcus(78)-	9.18975e-06	6.11709e-06	2.51186e-05	3.96779e-05	1.65844e-05	2.10621e-05	434
Otu0435	456	Bacteria(100)-Firmicutes(100)-Clostridia(100)-Clostridiales(100)-Lachnospiraceae(100)-Clostridium_XlVa(100)-	9.23422e-05	0.00018692	1.7431e-05	4.19323e-05	0.000272383	0.000358982	435
Otu0436	490	Bacteria(100)-Firmicutes(100)-Clostridia(100)-Clostridiales(100)-Ruminococcaceae(100)-Acetivibrio(100)-	9.59288e-05	4.65998e-05	4.35582e-05	2.53235e-05	8.94637e-05	4.9096e-05	436
Otu0437	1645	Bacteria(100)-Firmicutes(100)-Clostridia(100)-Clostridiales(100)-Lachnospiraceae(100)-Lachnospiracea_incertae_sedis(100)-	0.000470085	0.000927178	0.000507013	0.00144673	8.83152e-05	0.000197099	437
Otu0438	162	Bacteria(100)-Proteobacteria(100)-Alphaproteobacteria(100)-Rickettsiales(100)-Rickettsiaceae(100)-Orientia(100)-	1.77199e-05	2.48661e-05	3.7279e-05	3.26433e-05	1.27718e-05	1.59602e-05	438
Otu0439	34	Bacteria(100)-Firmicutes(100)-Clostridia(100)-Clostridiales(100)-Ruminococcaceae(100)-Ruminococcus(68)-	9.37845e-06	1.00033e-05	3.58141e-06	1.13254e-05	9.06318e-06	1.61405e-05	439
Otu0440	651	Bacteria(100)-Firmicutes(100)-Clostridia(100)-Clostridiales(100)-Lachnospiraceae(100)-Lachnospiracea_incertae_sedis(62)-	5.17697e-05	7.30716e-05	6.07391e-05	0.000167777	0.000280289	0.000502026	440
Otu0441	296	Bacteria(100)-Firmicutes(100)-Clostridia(100)-Clostridiales(100)-Gracilibacteraceae(53)-Lutispora(53)-	4.86246e-05	3.25428e-05	5.04444e-05	4.41801e-05	3.90099e-05	5.29389e-05	441
Otu0442	255	Bacteria(100)-Firmicutes(100)-Clostridia(100)-Clostridiales(100)-Lachnospiraceae(100)-Parasporobacterium(100)-	2.1132e-05	3.54412e-05	3.48665e-05	3.55139e-05	2.24533e-05	2.31034e-05	442
Otu0443	286	Bacteria(100)-Firmicutes(100)-Clostridia(100)-Clostridiales(100)-Ruminococcaceae(100)-Hydrogenoanaerobacterium(100)-	8.06537e-05	0.000166981	2.09163e-05	4.6008e-05	6.8949e-05	7.83615e-05	443
Otu0444	1644	Bacteria(100)-Firmicutes(100)-Clostridia(100)-Clostridiales(100)-Lachnospiraceae(100)-Marvinbryantia(100)-	0.000240951	0.000214365	0.000357292	0.000344449	0.000179493	0.000174962	444
Otu0445	2045	Bacteria(100)-Firmicutes(100)-Erysipelotrichia(100)-Erysipelotrichales(100)-Erysipelotrichaceae(100)-Clostridium_XVIII(100)-	0.000206559	0.000139111	0.000248443	0.000207073	0.000389404	0.000332602	445
Otu0446	1686	Bacteria(100)-Firmicutes(100)-Clostridia(100)-Clostridiales(100)-Lachnospiraceae(100)-Lachnospiracea_incertae_sedis(100)-	0.000421985	0.000165505	0.000206197	0.000227524	0.000272903	0.00016619	446
Otu0447	307	Bacteria(100)-Firmicutes(100)-Erysipelotrichia(100)-Erysipelotrichales(100)-Erysipelotrichaceae(100)-Holdemania(100)-	4.55245e-05	5.82468e-05	4.17299e-05	3.02338e-05	3.63328e-05	3.47822e-05	447
Otu0448	66	Bacteria(100)-Firmicutes(100)-Clostridia(100)-Clostridiales(100)-Lachnospiraceae(100)-Clostridium_XlVa(100)-	1.11101e-05	2.36283e-05	9.21733e-06	9.43775e-06	7.09119e-06	1.54843e-05	448
Otu0449	83515	Bacteria(100)-Proteobacteria(100)-Deltaproteobacteria(100)-Bdellovibrionales(100)-Bdellovibrionaceae(100)-Vampirovibrio(100)-	0.01421	0.0116053	0.0148682	0.00947638	0.0147628	0.00616049	449
Otu0450	43	Bacteria(100)-Firmicutes(100)-Clostridia(100)-Clostridiales(100)-Clostridiales_Incertae_Sedis_XII(100)-Acidaminobacter(100)-	6.44268e-06	1.03473e-05	1.17436e-05	1.84063e-05	3.94956e-06	9.06936e-06	450
Otu0451	1608	Bacteria(100)-Firmicutes(100)-Clostridia(100)-Clostridiales(100)-Clostridiales_Incertae_Sedis_XIII(100)-Anaerovorax(100)-	0.000275857	0.000229867	0.000229802	0.000212768	0.00034676	0.000140842	451
Otu0452	648	Bacteria(100)-Firmicutes(100)-Clostridia(100)-Clostridiales(100)-Clostridiaceae_1(100)-Anaerosporobacter(100)-	0.000196633	0.000199193	4.51359e-05	4.81364e-05	5.02869e-05	4.42637e-05	452
Otu0453	511	Bacteria(100)-Firmicutes(100)-Erysipelotrichia(100)-Erysipelotrichales(100)-Erysipelotrichaceae(100)-Clostridium_XVIII(100)-	1.91362e-05	5.60093e-05	0.000140421	0.000236697	8.72116e-05	0.000118889	453
Otu0454	925	Bacteria(100)-Firmicutes(100)-Clostridia(100)-Clostridiales(100)-Lachnospiraceae(100)-Robinsoniella(100)-	6.5086e-05	6.86846e-05	0.000194024	0.000252903	0.000132096	0.000142667	454
Otu0455	37	Bacteria(100)-Firmicutes(100)-Clostridia(100)-Clostridiales(100)-Lachnospiraceae(100)-Dorea(100)-	4.88849e-06	4.55682e-06	7.3037e-06	1.10847e-05	4.58057e-06	7.22003e-06	455
Otu0456	2791	Bacteria(100)-Firmicutes(100)-Clostridia(100)-Clostridiales(100)-Ruminococcaceae(100)-Sporobacter(100)-	0.000328842	0.000186832	0.00050457	0.000482807	0.000906797	0.000889817	456
Otu0457	1445	Bacteria(100)-Firmicutes(100)-Clostridia(100)-Clostridiales(100)-Lachnospiraceae(100)-Parasporobacterium(95)-	0.000451994	0.000771055	0.000407645	0.000923519	0.000186696	0.000414505	457
Otu0458	30	Bacteria(100)-Bacteroidetes(100)-Bacteroidia(100)-Bacteroidales(100)-Porphyromonadaceae(100)-Barnesiella(100)-	6.64364e-06	1.85557e-05	0	0	7.38301e-06	2.2149e-05	458
Otu0459	13966	Bacteria(100)-Firmicutes(100)-Clostridia(100)-Clostridiales(100)-Ruminococcaceae(100)-Ruminococcus(100)-	0.000380347	0.000840666	0.00287494	0.00603353	0.00252337	0.00443412	459
Otu0460	69	Bacteria(100)-Firmicutes(100)-Clostridia(100)-Clostridiales(100)-Lachnospiraceae(100)-Robinsoniella(72)-	3.55399e-06	9.10001e-06	6.91899e-06	1.09821e-05	5.51009e-06	9.33826e-06	460
Otu0461	870	Bacteria(100)-Firmicutes(100)-Clostridia(100)-Clostridiales(100)-Lachnospiraceae(100)-Clostridium_XlVa(100)-	1.19967e-05	1.8297e-05	4.38655e-05	5.82599e-05	0.000105743	0.000131651	461
Otu0462	1221	Bacteria(100)-Firmicutes(100)-Clostridia(100)-Clostridiales(100)-Ruminococcaceae(100)-Sporobacter(100)-	0.000371152	0.00036504	8.27793e-05	6.35375e-05	0.000133823	0.000147286	462
Otu0463	182	Bacteria(100)-Firmicutes(100)-Clostridia(100)-Clostridiales(100)-Lachnospiraceae(100)-Marvinbryantia(100)-	1.70556e-05	2.01529e-05	1.76164e-05	3.02381e-05	7.11965e-06	1.07338e-05	463
Otu0464	182	Bacteria(100)-Firmicutes(100)-Clostridia(100)-Clostridiales(100)-Lachnospiraceae(100)-Anaerostipes(100)-	3.67882e-05	3.72304e-05	2.51865e-05	2.77423e-05	4.2262e-05	3.54159e-05	464
Otu0465	740	Bacteria(100)-Firmicutes(100)-Clostridia(100)-Clostridiales(100)-Clostridiales_Incertae_Sedis_XIII(100)-Anaerovorax(100)-	0.0002892	0.000374208	3.00989e-05	1.69334e-05	7.87755e-05	7.9367e-05	465
Otu0466	27	Bacteria(100)-Bacteroidetes(100)-Bacteroidia(100)-Bacteroidales(100)-Prevotellaceae(100)-Prevotella(100)-	0	0	5.62717e-06	1.77947e-05	0	0	466
Otu0467	98	Bacteria(100)-Firmicutes(100)-Clostridia(100)-Clostridiales(100)-Lachnospiraceae(100)-Johnsonella(100)-	1.79393e-05	2.47677e-05	4.98991e-06	9.08187e-06	2.11348e-05	2.48614e-05	467
Otu0468	14471	Bacteria(100)-Firmicutes(100)-Bacilli(100)-Lactobacillales(100)-Lactobacillaceae(100)-Lactobacillus(100)-	0.00529855	0.00350791	0.00197299	0.00244073	0.00316466	0.00278996	468
Otu0469	105	Bacteria(100)-Firmicutes(100)-Clostridia(100)-Clostridiales(100)-Lachnospiraceae(100)-Syntrophococcus(83)-	5.66366e-05	0.000156839	2.60978e-06	4.54426e-06	1.2542e-05	2.60362e-05	469
Otu0470	1407	Bacteria(100)-Firmicutes(100)-Clostridia(100)-Clostridiales(100)-Ruminococcaceae(100)-Pseudoflavonifractor(100)-	0.000433564	0.000481323	0.00013109	7.62487e-05	0.000135165	6.42271e-05	470
Otu0471	654	Bacteria(100)-Firmicutes(100)-Clostridia(100)-Clostridiales(100)-Lachnospiraceae(100)-Robinsoniella(92)-	0.000179652	0.000149491	9.13462e-05	9.90745e-05	0.000100627	0.000129048	471
Otu0472	334	Bacteria(100)-Actinobacteria(72)-Actinobacteria(72)-Euzebyales(72)-Euzebyaceae(72)-Euzebya(72)-	9.97346e-05	9.81848e-05	1.70328e-05	1.81133e-05	6.65239e-05	6.46374e-05	472
Otu0473	1450	Bacteria(100)-Firmicutes(100)-Clostridia(100)-Clostridiales(100)-Ruminococcaceae(100)-Anaerotruncus(76)-	9.94571e-05	4.31133e-05	0.000162077	0.000204636	0.000120125	7.03356e-05	473
Otu0474	7848	Bacteria(100)-Firmicutes(100)-Clostridia(100)-Clostridiales(100)-Gracilibacteraceae(100)-Lutispora(100)-	0.000852459	0.00094214	0.00147841	0.00106213	0.000497663	0.000405866	474
Otu0475	830	Bacteria(100)-Firmicutes(100)-Clostridia(100)-Clostridiales(100)-Lachnospiraceae(71)-Robinsoniella(71)-	0.000108139	8.59975e-05	8.95655e-05	7.34518e-05	9.71881e-05	9.16738e-05	475
Otu0476	2494	Bacteria(100)-Firmicutes(100)-Clostridia(100)-Clostridiales(100)-Ruminococcaceae(100)-Clostridium_IV(100)-	0.000645213	0.000998448	0.000160591	0.000229895	0.000278597	0.00026647	476
Otu0477	475	Bacteria(100)-Firmicutes(100)-Clostridia(100)-Clostridiales(100)-Clostridiales_Incertae_Sedis_XIII(100)-Anaerovorax(100)-	3.11178e-05	3.26877e-05	8.00544e-05	0.00011986	7.50931e-05	6.95277e-05	477
Otu0478	1637	Bacteria(100)-Firmicutes(100)-Clostridia(100)-Clostridiales(100)-Ruminococcaceae(100)-Papillibacter(100)-	0.000414304	0.00030583	0.000220641	0.000159097	0.000115866	0.00011545	478
Otu0479	1458	Bacteria(100)-Firmicutes(100)-Clostridia(100)-Clostridiales(100)-Lachnospiraceae(100)-Roseburia(58)-	7.19e-05	5.01898e-05	0.000125569	7.88113e-05	0.000119619	8.47197e-05	479
Otu0480	320	Bacteria(100)-Firmicutes(100)-Clostridia(100)-Clostridiales(100)-Clostridiaceae_1(100)-Anaerosporobacter(100)-	0.000105699	0.000185703	6.24419e-05	0.000112543	1.81658e-05	2.63815e-05	480
Otu0481	10768	Bacteria(100)-Firmicutes(100)-Bacilli(100)-Lactobacillales(100)-Lactobacillaceae(100)-Lactobacillus(100)-	0.00311974	0.00308244	0.00125057	0.00122517	0.00189948	0.00250475	481
Otu0482	4141	Bacteria(100)-Firmicutes(100)-Clostridia(100)-Clostridiales(100)-Lachnospiraceae(100)-Lachnobacterium(53)-	0.00166304	0.00176299	0.000176942	0.000369745	0.000511224	0.000374432	482
Otu0483	165	Bacteria(100)-Firmicutes(100)-Clostridia(100)-Clostridiales(100)-Ruminococcaceae(100)-Pseudoflavonifractor(100)-	3.04537e-05	5.36608e-05	1.19759e-05	1.7455e-05	3.89579e-05	5.76087e-05	483
Otu0484	135	Bacteria(100)-Firmicutes(100)-Clostridia(100)-Clostridiales(100)-Lachnospiraceae(72)-Lachnospira(72)-	4.48464e-05	6.18156e-05	2.39435e-06	6.0797e-06	2.60787e-05	3.04203e-05	484
Otu0485	453	Bacteria(100)-Firmicutes(100)-Clostridia(100)-Clostridiales(100)-Ruminococcaceae(100)-Clostridium_IV(100)-	8.88109e-05	5.81419e-05	6.18938e-05	6.20885e-05	4.35281e-05	2.75918e-05	485
Otu0486	4281	Bacteria(100)-Firmicutes(100)-Clostridia(100)-Clostridiales(100)-Ruminococcaceae(100)-Ruminococcus(100)-	0.00212627	0.00382919	0	0	0.00196003	0.002788	486
Otu0487	473	Bacteria(100)-Firmicutes(100)-Clostridia(100)-Clostridiales(100)-Lachnospiraceae(100)-Lachnospiracea_incertae_sedis(60)-	3.1325e-06	9.90585e-06	3.75928e-06	7.92712e-06	1.33012e-05	2.43061e-05	487
Otu0488	338	Bacteria(100)-Firmicutes(100)-Clostridia(100)-Clostridiales(100)-Clostridiales_Incertae_Sedis_XII(100)-Guggenheimella(100)-	5.4786e-05	6.44557e-05	5.0497e-05	4.92716e-05	5.07647e-05	5.92504e-05	488
Otu0489	206	Bacteria(100)-Actinobacteria(100)-Actinobacteria(100)-Coriobacteriales(100)-Coriobacteriaceae(100)-Gordonibacter(100)-	3.42503e-05	2.74611e-05	2.89401e-05	2.12887e-05	3.6212e-05	3.05938e-05	489
Otu0490	663	Bacteria(100)-Firmicutes(100)-Clostridia(100)-Clostridiales(100)-Ruminococcaceae(100)-Pseudoflavonifractor(100)-	0.000107066	8.59651e-05	7.58979e-05	8.95786e-05	0.000147562	0.000125701	490
Otu0491	278	Bacteria(100)-Firmicutes(100)-Clostridia(100)-Clostridiales(100)-Lachnospiraceae(100)-Marvinbryantia(100)-	2.84598e-05	2.90477e-05	2.33087e-05	2.01833e-05	7.62658e-05	7.53202e-05	491
Otu0492	240	Bacteria(100)-Bacteroidetes(100)-Bacteroidia(100)-Bacteroidales(100)-Porphyromonadaceae(100)-Tannerella(100)-	5.56876e-05	3.87555e-05	3.8536e-05	2.39449e-05	1.05312e-05	1.64976e-05	492
Otu0493	505	Bacteria(100)-Firmicutes(100)-Clostridia(100)-Clostridiales(100)-Lachnospiraceae(100)-Syntrophococcus(100)-	8.04572e-05	6.65397e-05	4.3432e-05	5.01757e-05	9.98165e-05	7.75274e-05	493
Otu0494	827	Bacteria(100)-Firmicutes(100)-Clostridia(100)-Clostridiales(100)-Ruminococcaceae(100)-Clostridium_IV(100)-	0.000117221	0.000124915	0.000118829	0.000182698	5.40052e-05	8.81329e-05	494
Otu0495	2347	Bacteria(100)-Firmicutes(100)-Clostridia(100)-Clostridiales(100)-Lachnospiraceae(100)-Acetitomaculum(100)-	0.000621361	0.0005184	0.00034577	0.00035895	0.00039093	0.000332114	495
Otu0496	480	Bacteria(100)-Firmicutes(100)-Clostridia(100)-Clostridiales(100)-Lachnospiraceae(100)-Dorea(100)-	0.000262177	0.000291711	1.0152e-05	1.45744e-05	0.000150394	0.000154251	496
Otu0497	632	Bacteria(100)-Firmicutes(100)-Clostridia(100)-Clostridiales(100)-Ruminococcaceae(100)-Hydrogenoanaerobacterium(100)-	7.43602e-05	4.65696e-05	7.23505e-05	6.71203e-05	0.000103445	0.00011111	497
Otu0498	363	Bacteria(100)-Firmicutes(100)-Clostridia(100)-Clostridiales(100)-Ruminococcaceae(100)-Clostridium_IV(93)-	4.9704e-05	3.23417e-05	7.27505e-05	3.65783e-05	7.7144e-05	6.29309e-05	498
Otu0499	442	Bacteria(100)-Firmicutes(100)-Clostridia(100)-Clostridiales(100)-Lachnospiraceae(100)-Lachnospiracea_incertae_sedis(100)-	4.06919e-05	4.89402e-05	0	0	0.000425002	0.000621619	499
Otu0500	20813	Bacteria(100)-Firmicutes(100)-Erysipelotrichia(100)-Erysipelotrichales(100)-Erysipelotrichaceae(100)-Turicibacter(100)-	0.0110873	0.0175085	0.00297649	0.00557321	0.00137846	0.0022853	500
Otu0501	795	Bacteria(100)-Firmicutes(100)-Clostridia(100)-Clostridiales(100)-Lachnospiraceae(100)-Clostridium_XlVa(100)-	6.9804e-05	7.606e-05	0.000136855	0.000133906	0.00012815	9.88245e-05	501
Otu0502	3207	Bacteria(100)-Firmicutes(100)-Clostridia(100)-Clostridiales(100)-Lachnospiraceae(100)-Lactonifactor(100)-	0.000319987	0.000196919	0.000732496	0.000404722	0.000202852	0.000141575	502
Otu0503	416	Bacteria(100)-Firmicutes(100)-Clostridia(67)-Clostridiales(67)-Lachnospiraceae(67)-Lachnospira(67)-	9.16015e-05	7.16312e-05	6.73262e-05	9.30196e-05	2.98434e-05	3.51848e-05	503
Otu0504	293	Bacteria(100)-Bacteroidetes(100)-Bacteroidia(100)-Bacteroidales(100)-Porphyromonadaceae(100)-Barnesiella(100)-	0	0	2.97267e-06	9.4004e-06	0	0	504
Otu0505	319	Bacteria(100)-Firmicutes(94)-Clostridia(94)-Clostridiales(94)-Ruminococcaceae(94)-Faecalibacterium(94)-	2.12825e-05	1.35629e-05	3.48617e-05	3.67762e-05	2.08636e-05	2.69847e-05	505
Otu0506	295	Bacteria(100)-Firmicutes(100)-Clostridia(100)-Clostridiales(100)-Ruminococcaceae(100)-Papillibacter(100)-	5.68363e-05	3.97584e-05	3.99289e-05	3.22164e-05	7.43966e-05	6.81737e-05	506
Otu0507	148	Bacteria(100)-Firmicutes(100)-Clostridia(100)-Clostridiales(100)-Clostridiaceae_1(100)-Anaerosporobacter(100)-	1.11257e-05	9.07739e-06	1.97954e-05	1.96513e-05	2.40446e-05	2.85371e-05	507
Otu0508	388	Bacteria(100)-Firmicutes(100)-Clostridia(100)-Clostridiales(100)-Lachnospiraceae(100)-Clostridium_XlVb(100)-	5.45538e-05	4.6551e-05	4.66018e-05	3.55025e-05	6.75742e-05	3.49539e-05	508
Otu0509	3853	Bacteria(100)-Firmicutes(100)-Clostridia(100)-Clostridiales(100)-Ruminococcaceae(100)-Ruminococcus(100)-	0.00112313	0.00320389	8.32455e-05	0.000112118	0.000213073	0.000477349	509
Otu0510	96	Bacteria(100)-Firmicutes(100)-Clostridia(100)-Clostridiales(100)-Clostridiales_Incertae_Sedis_XII(100)-Guggenheimella(100)-	8.62055e-06	1.85248e-05	4.90806e-06	8.11107e-06	6.06535e-06	1.47377e-05	510
Otu0511	480	Bacteria(100)-Firmicutes(100)-Clostridia(100)-Clostridiales(100)-Lachnospiraceae(100)-Parasporobacterium(100)-	4.63836e-05	7.33718e-05	5.91398e-05	9.78422e-05	5.67679e-06	7.29703e-06	511
Otu0512	351	Bacteria(100)-Firmicutes(100)-Erysipelotrichia(100)-Erysipelotrichales(100)-Erysipelotrichaceae(100)-Holdemania(100)-	4.66251e-05	3.57646e-05	4.88241e-05	3.4222e-05	7.44648e-05	3.63339e-05	512
Otu0513	1620	Bacteria(100)-Tenericutes(100)-Mollicutes(100)-Anaeroplasmatales(100)-Anaeroplasmataceae(100)-Anaeroplasma(100)-	0.000500696	0.000978121	0.000133216	0.000216332	0.000588403	0.00030885	513
Otu0514	147	Bacteria(100)-Firmicutes(100)-Clostridia(100)-Clostridiales(100)-Lachnospiraceae(100)-Marvinbryantia(75)-	2.73237e-05	2.95313e-05	1.15121e-05	1.54553e-05	3.02465e-05	4.62086e-05	514
Otu0515	322	Bacteria(100)-Firmicutes(100)-Erysipelotrichia(100)-Erysipelotrichales(100)-Erysipelotrichaceae(100)-Bulleidia(100)-	3.99413e-05	6.92908e-05	3.92867e-05	7.27593e-05	0.000148679	0.000333669	515
Otu0516	2775	Bacteria(100)-Firmicutes(100)-Clostridia(100)-Clostridiales(100)-Lachnospiraceae(100)-Johnsonella(100)-	4.30851e-05	5.28907e-05	0.000204395	0.000160651	0.000132667	0.000194099	516
Otu0517	245	Bacteria(100)-Firmicutes(100)-Clostridia(100)-Clostridiales(100)-Ruminococcaceae(100)-Clostridium_IV(100)-	6.72162e-05	3.54075e-05	2.53475e-05	2.1141e-05	3.10206e-05	3.82631e-05	517
Otu0518	713	Bacteria(100)-Firmicutes(100)-Clostridia(100)-Clostridiales(100)-Clostridiales_Incertae_Sedis_XIII(100)-Anaerovorax(100)-	0.000147432	0.000191489	0.000102708	0.000157583	8.96706e-05	5.59274e-05	518
Otu0519	217	Bacteria(100)-Firmicutes(100)-Clostridia(100)-Clostridiales(100)-Clostridiales_Incertae_Sedis_XI(65)-Sporanaerobacter(65)-	5.48733e-05	3.16499e-05	2.21402e-05	2.51908e-05	2.77572e-05	3.53724e-05	519
Otu0520	733	Bacteria(100)-Firmicutes(100)-Clostridia(100)-Clostridiales(100)-Lachnospiraceae(100)-Clostridium_XlVa(78)-	0.000204388	0.000206677	3.112e-05	4.95798e-05	0.000166363	0.000301931	520
Otu0521	27	Bacteria(100)-Firmicutes(100)-Clostridia(100)-Clostridiales(100)-Ruminococcaceae(100)-Clostridium_IV(100)-	1.75527e-06	3.96674e-06	6.67437e-06	9.90406e-06	5.04237e-06	8.10634e-06	521
Otu0522	194	Bacteria(100)-Firmicutes(100)-Clostridia(100)-Clostridiales(100)-Ruminococcaceae(100)-Flavonifractor(100)-	3.71961e-05	4.62472e-05	2.45739e-05	2.83807e-05	2.20162e-05	2.54009e-05	522
Otu0523	1739	Bacteria(100)-Firmicutes(100)-Clostridia(100)-Clostridiales(100)-Peptococcaceae_1(100)-Desulfitibacter(100)-	0.000278586	0.000242449	0.000190346	0.00018983	0.000252665	0.00025124	523
Otu0524	101	Bacteria(100)-Firmicutes(100)-Clostridia(100)-Clostridiales(100)-Ruminococcaceae(100)-Faecalibacterium(72)-	1.16144e-05	1.59301e-05	9.31724e-06	1.26542e-05	8.77201e-06	8.6068e-06	524
Otu0525	96	Bacteria(100)-Firmicutes(100)-Clostridia(100)-Clostridiales(100)-Clostridiales_Incertae_Sedis_XII(100)-Guggenheimella(100)-	0	0	2.47476e-05	3.86825e-05	0	0	525
Otu0526	496	Bacteria(100)-Proteobacteria(69)-Alphaproteobacteria(69)-Rickettsiales(69)-Rickettsiaceae(69)-Orientia(69)-	5.93567e-05	5.57198e-05	8.66672e-05	0.000111671	9.86601e-05	7.15814e-05	526
Otu0527	679	Bacteria(100)-Firmicutes(100)-Clostridia(100)-Clostridiales(100)-Lachnospiraceae(100)-Acetitomaculum(100)-	7.00554e-06	1.51462e-05	6.36186e-05	0.000111341	0.000189682	0.000284852	527
Otu0528	1788	Bacteria(100)-Firmicutes(100)-Erysipelotrichia(100)-Erysipelotrichales(100)-Erysipelotrichaceae(100)-Holdemania(100)-	0.00045962	0.000549177	0.000229792	0.000212469	0.000267971	0.000176416	528
Otu0529	3189	Bacteria(100)-Firmicutes(100)-Clostridia(100)-Clostridiales(100)-Ruminococcaceae(100)-Oscillibacter(100)-	0.000217976	0.000165643	0.000293628	0.000237801	0.000463675	0.000316324	529
Otu0530	322	Bacteria(100)-Firmicutes(100)-Clostridia(100)-Clostridiales(100)-Ruminococcaceae(100)-Flavonifractor(68)-	3.00246e-05	2.17028e-05	2.4084e-05	2.52606e-05	5.32353e-05	4.28837e-05	530
Otu0531	119	Bacteria(100)-Firmicutes(100)-Clostridia(100)-Clostridiales(100)-Lachnospiraceae(100)-Dorea(100)-	5.02272e-05	0.000132047	6.11538e-06	6.77217e-06	1.95182e-05	2.36365e-05	531
Otu0532	12453	Bacteria(100)-Bacteroidetes(100)-Bacteroidia(100)-Bacteroidales(100)-Porphyromonadaceae(100)-Barnesiella(100)-	0.00177335	0.00112875	0.00221462	0.00142706	0.00188275	0.00165582	532
Otu0533	94	Bacteria(100)-Actinobacteria(100)-Actinobacteria(100)-Coriobacteriales(100)-Coriobacteriaceae(100)-Paraeggerthella(100)-	1.09634e-05	1.47484e-05	2.287e-05	6.67281e-05	1.89796e-05	1.74842e-05	533
Otu0534	69	Bacteria(100)-Firmicutes(100)-Clostridia(100)-Clostridiales(100)-Lachnospiraceae(100)-Clostridium_XlVa(100)-	1.3258e-05	1.82832e-05	1.04457e-05	1.73174e-05	6.79823e-06	1.13348e-05	534
Otu0535	312	Bacteria(100)-Firmicutes(100)-Clostridia(100)-Clostridiales(100)-Ruminococcaceae(100)-Hydrogenoanaerobacterium(100)-	2.69496e-05	1.60356e-05	1.84894e-05	2.32192e-05	4.8115e-05	5.57898e-05	535
Otu0536	1803	Bacteria(100)-Firmicutes(100)-Clostridia(100)-Clostridiales(100)-Lachnospiraceae(100)-Clostridium_XlVa(90)-	9.00728e-05	0.000151577	0.000292613	0.000354906	6.17902e-05	7.20305e-05	536
Otu0537	680	Bacteria(100)-Firmicutes(100)-Clostridia(100)-Clostridiales(100)-Clostridiales_Incertae_Sedis_XII(100)-Guggenheimella(100)-	0.000227283	0.000451972	0.000166479	0.00024925	0.000140345	0.000259746	537
Otu0538	7608	Bacteria(100)-Firmicutes(100)-Clostridia(100)-Clostridiales(100)-Lachnospiraceae(100)-Marvinbryantia(100)-	0.00312272	0.00532787	0.000187653	0.000369824	0.00198151	0.00170526	538
Otu0539	11092	Bacteria(100)-Firmicutes(100)-Clostridia(100)-Clostridiales(100)-Lachnospiraceae(100)-Clostridium_XlVa(100)-	0.00136558	0.00148182	0.000849607	0.00107786	0.000963002	0.00139209	539
Otu0540	100	Bacteria(100)-Firmicutes(100)-Clostridia(100)-Clostridiales(100)-Clostridiales_Incertae_Sedis_XII(88)-Acidaminobacter(88)-	1.12193e-05	1.38776e-05	9.96227e-06	1.03716e-05	1.6684e-05	1.62466e-05	540
Otu0541	527	Bacteria(100)-Firmicutes(100)-Clostridia(100)-Clostridiales(100)-Lachnospiraceae(100)-Clostridium_XlVa(100)-	4.68168e-05	0.000134363	1.0218e-05	1.44873e-05	1.42968e-05	2.92187e-05	541
Otu0542	814	Bacteria(100)-Firmicutes(100)-Clostridia(100)-Clostridiales(100)-Lachnospiraceae(100)-Roseburia(72)-	4.41017e-06	6.78699e-06	0.000146818	0.000415942	2.28962e-05	4.2811e-05	542
Otu0543	420	Bacteria(100)-Firmicutes(100)-Clostridia(100)-Clostridiales(100)-Ruminococcaceae(100)-Butyricicoccus(100)-	1.98615e-05	2.53571e-05	5.38962e-05	4.90127e-05	8.1892e-05	3.07966e-05	543
Otu0544	11153	Bacteria(100)-Firmicutes(100)-Clostridia(100)-Clostridiales(100)-Clostridiales_Incertae_Sedis_XIII(100)-Anaerovorax(100)-	0.00169776	0.000747254	0.00116564	0.000736813	0.00117861	0.00115336	544
Otu0545	23	Bacteria(100)-Firmicutes(100)-Clostridia(100)-Clostridiales(100)-Ruminococcaceae(100)-Clostridium_IV(100)-	1.75527e-06	3.96674e-06	3.16915e-06	5.13565e-06	8.98968e-06	2.05475e-05	545
Otu0546	286	Bacteria(100)-Firmicutes(100)-Clostridia(100)-Clostridiales(100)-Lachnospiraceae(100)-Clostridium_XlVa(100)-	2.92515e-05	3.0803e-05	3.04929e-05	2.65377e-05	0.00013991	0.000172418	546
Otu0547	14240	Bacteria(100)-Proteobacteria(100)-Deltaproteobacteria(100)-Bdellovibrionales(100)-Bdellovibrionaceae(100)-Vampirovibrio(100)-	0.00160247	0.00263309	0.00121546	0.000781905	0.00176843	0.000923098	547
Otu0548	166	Bacteria(100)-Firmicutes(100)-Clostridia(100)-Clostridiales(100)-Gracilibacteraceae(100)-Gracilibacter(100)-	3.28292e-05	5.46885e-05	2.92768e-05	4.20224e-05	1.68085e-05	1.74111e-05	548
Otu0549	1888	Bacteria(100)-Firmicutes(100)-Clostridia(100)-Clostridiales(100)-Lachnospiraceae(100)-Clostridium_XlVb(100)-	0.000241988	0.000219021	0.000132916	0.000156236	0.000526009	0.000772246	549
Otu0550	2095	Bacteria(100)-Elusimicrobia(100)-Elusimicrobia(100)-Elusimicrobiales(100)-Elusimicrobiaceae(100)-Elusimicrobium(100)-	0.000806825	0.000748871	0.000100725	0.000188049	0.000496442	0.000367073	550
Otu0551	759	Bacteria(100)-Firmicutes(100)-Clostridia(100)-Clostridiales(100)-Lachnospiraceae(100)-Clostridium_XlVa(100)-	8.99358e-05	0.000143663	6.13572e-05	0.00010062	0.000142715	0.000115482	551
Otu0552	466	Bacteria(100)-Firmicutes(100)-Clostridia(100)-Clostridiales(100)-Lachnospiraceae(100)-Johnsonella(100)-	2.94459e-05	2.89265e-05	4.01702e-05	5.07706e-05	6.04091e-05	3.84923e-05	552
Otu0553	149	Bacteria(100)-Firmicutes(100)-Clostridia(100)-Clostridiales(100)-Eubacteriaceae(100)-Anaerofustis(100)-	1.81126e-05	1.6718e-05	1.87784e-05	2.20327e-05	1.2814e-05	1.6093e-05	553
Otu0554	2172	Bacteria(100)-Firmicutes(100)-Clostridia(100)-Clostridiales(100)-Lachnospiraceae(100)-Blautia(70)-	0.000171574	0.000162004	0.000163621	0.000112871	0.000509438	0.00113893	554
Otu0555	29	Bacteria(100)-Firmicutes(100)-Clostridia(100)-Clostridiales(100)-Clostridiaceae_1(100)-Oxobacter(100)-	5.60017e-06	1.30569e-05	1.97825e-06	3.33179e-06	4.87686e-06	6.28772e-06	555
Otu0556	133	Bacteria(100)-Firmicutes(100)-Clostridia(100)-Clostridiales(100)-Clostridiaceae_1(100)-Proteiniclasticum(100)-	4.35638e-06	4.97985e-06	3.0129e-05	5.43894e-05	7.16846e-06	1.24222e-05	556
Otu0557	3891	Bacteria(100)-Firmicutes(100)-Clostridia(100)-Clostridiales(100)-Ruminococcaceae(100)-Clostridium_IV(100)-	0	0	0.000748219	0.000650186	0.00031107	0.000305802	557
Otu0558	2629	Bacteria(100)-Firmicutes(100)-Clostridia(100)-Clostridiales(100)-Lachnospiraceae(100)-Clostridium_XlVa(100)-	0.000667386	0.00114413	0.000204481	0.000509415	0.00127701	0.00113747	558
Otu0559	20165	Bacteria(100)-Firmicutes(100)-Clostridia(100)-Clostridiales(100)-Ruminococcaceae(100)-Ruminococcus(100)-	0.00322267	0.00389806	0.00211792	0.00130435	0.00227094	0.00124806	559
Otu0560	436	Bacteria(100)-Firmicutes(100)-Clostridia(100)-Clostridiales(100)-Clostridiaceae_4(100)-Thermotalea(92)-	1.96553e-06	4.21717e-06	9.99614e-05	6.78959e-05	1.19882e-05	1.8223e-05	560
Otu0561	604	Bacteria(100)-Firmicutes(100)-Clostridia(100)-Clostridiales(100)-Lachnospiraceae(100)-Lachnospiracea_incertae_sedis(79)-	2.4978e-05	2.41235e-05	9.04109e-06	1.15238e-05	5.33099e-05	4.50244e-05	561
Otu0562	52	Bacteria(100)-Proteobacteria(100)-Alphaproteobacteria(100)-Rickettsiales(100)-Rickettsiaceae(100)-Orientia(100)-	1.36047e-05	1.19818e-05	3.01207e-06	7.61503e-06	1.21048e-05	1.62638e-05	562
Otu0563	177	Bacteria(100)-Firmicutes(100)-Clostridia(100)-Clostridiales(100)-Clostridiales_Incertae_Sedis_XI(78)-Sporanaerobacter(78)-	3.48711e-05	1.41035e-05	2.33717e-05	1.73975e-05	2.96342e-05	3.6071e-05	563
Otu0564	4417	Bacteria(100)-Bacteroidetes(100)-Bacteroidia(100)-Bacteroidales(100)-Porphyromonadaceae(100)-Tannerella(100)-	0.000822069	0.000534095	0.000584917	0.000568144	0.000555167	0.000674798	564
Otu0565	108	Bacteria(100)-Firmicutes(100)-Clostridia(100)-Clostridiales(100)-Lachnospiraceae(100)-Parasporobacterium(100)-	5.25384e-05	9.19958e-05	3.03706e-06	6.58314e-06	3.19083e-05	3.12919e-05	565
Otu0566	598	Bacteria(100)-Firmicutes(100)-Clostridia(100)-Clostridiales(100)-Lachnospiraceae(100)-Marvinbryantia(100)-	5.68104e-05	6.79545e-05	0.000115154	8.1206e-05	9.2928e-05	8.57353e-05	566
Otu0567	39	Bacteria(100)-Firmicutes(100)-Clostridia(100)-Clostridiales(100)-Clostridiales_Incertae_Sedis_XIII(100)-Mogibacterium(100)-	4.49003e-06	7.36975e-06	3.05605e-06	9.66407e-06	2.30677e-05	4.45797e-05	567
Otu0568	68	Bacteria(100)-Firmicutes(100)-Clostridia(100)-Clostridiales(100)-Lachnospiraceae(100)-Marvinbryantia(100)-	1.13675e-05	2.11176e-05	3.85029e-06	8.81893e-06	6.69103e-06	1.14446e-05	568
Otu0569	1551	Bacteria(100)-Firmicutes(100)-Clostridia(100)-Clostridiales(100)-Lachnospiraceae(100)-Coprococcus(100)-	0.000258118	0.000331943	0.000104862	0.000142544	0.000326627	0.000437104	569
Otu0570	242	Bacteria(100)-Firmicutes(100)-Clostridia(100)-Clostridiales(100)-Ruminococcaceae(100)-Clostridium_IV(100)-	0.000129371	0.000111736	0	0	6.46039e-05	9.47869e-05	570
Otu0571	213	Bacteria(100)-Firmicutes(100)-Clostridia(100)-Clostridiales(100)-Lachnospiraceae(100)-Clostridium_XlVb(100)-	2.59091e-05	6.35356e-05	1.59895e-05	2.93439e-05	2.3604e-05	4.91781e-05	571
Otu0572	2013	Bacteria(100)-Firmicutes(100)-Clostridia(100)-Clostridiales(100)-Ruminococcaceae(100)-Clostridium_IV(100)-	0.000301334	0.000624614	5.44751e-05	0.000125197	0.000451525	0.000564366	572
Otu0573	292	Bacteria(100)-Firmicutes(100)-Clostridia(100)-Clostridiales(100)-Lachnospiraceae(100)-Marvinbryantia(100)-	1.74851e-05	1.90155e-05	5.54255e-05	6.44667e-05	4.03225e-05	2.85682e-05	573
Otu0574	46	Bacteria(100)-Firmicutes(100)-Clostridia(100)-Clostridiales(100)-Lachnospiraceae(100)-Dorea(100)-	6.53775e-06	1.18022e-05	1.19917e-05	1.04084e-05	1.85913e-06	5.5774e-06	574
Otu0575	173	Bacteria(100)-Firmicutes(100)-Clostridia(100)-Clostridiales(100)-Lachnospiraceae(100)-Butyrivibrio(100)-	7.54891e-06	1.41818e-05	2.88464e-05	3.3519e-05	9.96351e-07	2.98905e-06	575
Otu0576	49	Bacteria(100)-Firmicutes(100)-Clostridia(100)-Clostridiales(100)-Ruminococcaceae(100)-Clostridium_IV(100)-	5.52121e-06	1.30385e-05	3.89546e-06	5.48038e-06	1.10139e-05	1.53344e-05	576
Otu0577	978	Bacteria(100)-Firmicutes(100)-Clostridia(100)-Clostridiales(100)-Ruminococcaceae(100)-Anaerotruncus(100)-	0.000172665	0.000104253	8.62097e-05	5.20343e-05	0.000153005	0.000106965	577
Otu0578	15	Bacteria(100)-Firmicutes(100)-Clostridia(100)-Clostridiales(100)-Ruminococcaceae(100)-Faecalibacterium(100)-	3.04293e-06	7.53888e-06	1.12537e-06	2.38469e-06	4.91227e-06	6.2913e-06	578
Otu0579	723	Bacteria(100)-Firmicutes(100)-Clostridia(100)-Clostridiales(100)-Lachnospiraceae(100)-Marvinbryantia(100)-	6.9783e-05	0.000118228	0.000126596	0.000236058	0.000266043	0.000410305	579
Otu0580	13	Bacteria(100)-Firmicutes(100)-Clostridia(100)-Clostridiales(100)-Clostridiales_Incertae_Sedis_XII(100)-Guggenheimella(100)-	8.1385e-06	2.57362e-05	0	0	1.82848e-06	5.48543e-06	580
Otu0581	13	Bacteria(100)-Firmicutes(100)-Clostridia(100)-Clostridiales(100)-Peptostreptococcaceae(100)-Acetoanaerobium(100)-	1.42349e-06	3.04135e-06	6.13806e-07	1.94102e-06	1.81682e-06	3.62679e-06	581
Otu0582	20	Bacteria(100)-Firmicutes(100)-Clostridia(100)-Clostridiales(100)-Ruminococcaceae(100)-Clostridium_IV(100)-	4.6264e-06	6.12015e-06	1.10986e-06	2.35655e-06	3.76373e-06	6.2697e-06	582
Otu0583	6261	Bacteria(100)-Firmicutes(100)-Clostridia(100)-Clostridiales(100)-Lachnospiraceae(100)-Acetitomaculum(100)-	0.000440444	0.000809758	0.000128618	0.00021084	9.08782e-05	9.5438e-05	583
Otu0584	87	Bacteria(100)-Firmicutes(100)-Clostridia(100)-Clostridiales(100)-Lachnospiraceae(100)-Sporobacterium(100)-	1.4801e-05	2.60901e-05	0	0	5.61461e-05	0.000159038	584
Otu0585	23	Bacteria(100)-Proteobacteria(100)-Alphaproteobacteria(100)-Rhizobiales(100)-Brucellaceae(100)-Daeguia(100)-	1.9328e-06	4.31823e-06	0	0	1.05472e-06	3.16415e-06	585
Otu0586	298	Bacteria(100)-Firmicutes(100)-Clostridia(100)-Clostridiales(100)-Lachnospiraceae(100)-Clostridium_XlVb(100)-	0.000134999	0.000349832	0	0	7.25804e-05	0.000178653	586
Otu0587	339	Bacteria(100)-Firmicutes(100)-Clostridia(100)-Clostridiales(100)-Lachnospiraceae(100)-Marvinbryantia(100)-	4.20109e-05	4.19461e-05	4.846e-05	4.47303e-05	4.07448e-05	4.4442e-05	587
Otu0588	24	Bacteria(100)-Proteobacteria(100)-Gammaproteobacteria(100)-Pasteurellales(100)-Pasteurellaceae(100)-Pasteurella(100)-	1.72559e-06	3.73698e-06	1.84142e-06	5.82307e-06	1.49755e-05	3.64251e-05	588
Otu0589	1113	Bacteria(100)-Firmicutes(100)-Clostridia(100)-Clostridiales(100)-Lachnospiraceae(100)-Clostridium_XlVb(100)-	0.000643788	0.00196287	0	0	7.68403e-06	2.30521e-05	589
Otu0590	437	Bacteria(100)-Proteobacteria(100)-Deltaproteobacteria(100)-Bdellovibrionales(100)-Bdellovibrionaceae(100)-Vampirovibrio(100)-	8.12083e-05	0.000110236	3.28813e-05	4.16514e-05	0.000101798	0.000139001	590
Otu0591	3063	Bacteria(100)-Deferribacteres(100)-Deferribacteres(100)-Deferribacterales(100)-Deferribacteraceae(100)-Mucispirillum(100)-	0.00051841	0.000710594	0.000639003	0.00117748	0.000206206	0.00015581	591
Otu0592	47	Bacteria(100)-Firmicutes(100)-Clostridia(100)-Clostridiales(100)-Ruminococcaceae(100)-Butyricicoccus(100)-	4.43474e-06	7.01721e-06	5.32462e-06	7.57889e-06	9.03696e-06	1.10233e-05	592
Otu0593	29	Bacteria(100)-Proteobacteria(100)-Gammaproteobacteria(100)-Pasteurellales(100)-Pasteurellaceae(100)-Actinobacillus(100)-	2.68445e-06	4.46379e-06	8.77815e-06	8.50836e-06	1.82848e-06	5.48543e-06	593
Otu0594	529	Bacteria(100)-Proteobacteria(100)-Epsilonproteobacteria(100)-Campylobacterales(100)-Helicobacteraceae(100)-Helicobacter(100)-	0	0	2.6948e-05	4.0848e-05	0	0	594
Otu0595	306	Bacteria(100)-Firmicutes(100)-Clostridia(100)-Clostridiales(100)-Lachnospiraceae(100)-Acetitomaculum(100)-	0.000167201	0.000159753	0	0	6.19913e-05	9.88323e-05	595
Otu0596	242	Bacteria(100)-Firmicutes(100)-Clostridia(100)-Clostridiales(100)-Lachnospiraceae(100)-Robinsoniella(100)-	2.36151e-06	7.46776e-06	7.18825e-06	1.12414e-05	6.56375e-06	1.96912e-05	596
Otu0597	141	Bacteria(100)-Firmicutes(100)-Negativicutes(100)-Selenomonadales(100)-Veillonellaceae(100)-Anaeroglobus(100)-	0.000116789	0.000197631	0	0	8.18743e-06	1.91066e-05	597
Otu0598	111	Bacteria(100)-Firmicutes(100)-Clostridia(100)-Clostridiales(100)-Clostridiaceae_1(100)-Anaerosporobacter(100)-	1.562e-05	1.05296e-05	2.04108e-05	1.36092e-05	2.00085e-05	1.51987e-05	598
Otu0599	974	Bacteria(100)-Firmicutes(100)-Clostridia(100)-Clostridiales(100)-Lachnospiraceae(100)-Clostridium_XlVa(100)-	9.46147e-05	5.40249e-05	5.37941e-05	0.000125905	0.0003278	0.00032086	599
Otu0600	123	Bacteria(100)-Firmicutes(100)-Erysipelotrichia(100)-Erysipelotrichales(100)-Erysipelotrichaceae(100)-Holdemania(100)-	7.34612e-05	0.00016277	0	0	4.22933e-05	5.19976e-05	600
Otu0601	24	Bacteria(100)-Firmicutes(100)-Clostridia(100)-Clostridiales(100)-Ruminococcaceae(100)-Papillibacter(100)-	2.65125e-06	6.53579e-06	6.22237e-06	1.31655e-05	2.05678e-06	4.1135e-06	601
Otu0602	530	Bacteria(100)-Firmicutes(100)-Clostridia(100)-Clostridiales(100)-Gracilibacteraceae(100)-Gracilibacter(100)-	0.000101725	7.33549e-05	7.00938e-05	4.87834e-05	6.06709e-05	4.53048e-05	602
Otu0603	1576	Bacteria(100)-Firmicutes(100)-Clostridia(100)-Clostridiales(100)-Ruminococcaceae(100)-Clostridium_IV(100)-	0.000269829	0.000128289	0.000298552	0.000219087	0.000166801	0.000171352	603
Otu0604	73	Bacteria(100)-Firmicutes(100)-Clostridia(100)-Clostridiales(100)-Lachnospiraceae(100)-Robinsoniella(100)-	2.94007e-05	6.59848e-05	3.47344e-06	9.07553e-06	4.09575e-06	6.62504e-06	604
Otu0605	27	Bacteria(100)-Firmicutes(100)-Clostridia(100)-Clostridiales(100)-Gracilibacteraceae(100)-Lutispora(100)-	1.1679e-05	1.32684e-05	0	0	1.15414e-05	1.2182e-05	605
Otu0606	1425	Bacteria(100)-Firmicutes(100)-Clostridia(100)-Clostridiales(100)-Lachnospiraceae(100)-Lachnospiracea_incertae_sedis(100)-	0.000163359	0.000252721	0.000133117	0.000337824	0.000173846	0.000179246	606
Otu0607	3811	Bacteria(100)-Firmicutes(100)-Clostridia(100)-Clostridiales(100)-Lachnospiraceae(100)-Lachnospiracea_incertae_sedis(100)-	0.000356676	0.00045556	0.000174737	0.00027935	0.00122391	0.00183008	607
Otu0608	130	Bacteria(100)-Firmicutes(100)-Clostridia(100)-Clostridiales(100)-Ruminococcaceae(100)-Acetivibrio(100)-	1.04091e-05	1.452e-05	3.35044e-05	2.18094e-05	7.61803e-06	1.08604e-05	608
Otu0609	10	Bacteria(100)-Proteobacteria(100)-Alphaproteobacteria(100)-Rhodospirillales(100)-Rhodospirillaceae(100)-Insolitispirillum(100)-	0	0	5.32768e-06	1.12737e-05	0	0	609
Otu0610	628	Bacteria(100)-Firmicutes(100)-Clostridia(100)-Clostridiales(100)-Lachnospiraceae(100)-Dorea(100)-	8.87318e-05	9.8599e-05	9.11708e-05	0.000187038	6.67419e-05	7.8662e-05	610
Otu0611	206	Bacteria(100)-Firmicutes(100)-Clostridia(100)-Clostridiales(100)-Lachnospiraceae(100)-Clostridium_XlVa(100)-	2.21683e-06	4.82493e-06	1.65548e-05	4.49076e-05	4.04601e-06	8.11472e-06	611
Otu0612	45	Bacteria(100)-Verrucomicrobia(100)-Opitutae(100)-Puniceicoccales(100)-Puniceicoccaceae(100)-Coraliomargarita(100)-	1.0585e-05	1.03142e-05	1.22884e-06	3.88594e-06	1.02054e-05	1.33483e-05	612
Otu0613	77	Bacteria(100)-Proteobacteria(100)-Alphaproteobacteria(100)-Rhodospirillales(100)-Rhodospirillaceae(100)-Insolitispirillum(100)-	0	0	0	0	7.86657e-05	9.02546e-05	613
Otu0614	417	Bacteria(100)-Firmicutes(100)-Clostridia(100)-Clostridiales(100)-Lachnospiraceae(100)-Johnsonella(100)-	1.43025e-05	3.07751e-05	4.14453e-05	7.22698e-05	2.20916e-05	6.62748e-05	614
Otu0615	18923	Bacteria(100)-Firmicutes(100)-Clostridia(100)-Clostridiales(100)-Lachnospiraceae(100)-Lachnospiracea_incertae_sedis(100)-	0.00100799	0.00164527	0.0020235	0.00332326	0.00202489	0.00110931	615
Otu0616	2238	Bacteria(100)-Firmicutes(100)-Clostridia(100)-Clostridiales(100)-Lachnospiraceae(100)-Lactonifactor(100)-	0.000552205	0.00106977	9.9455e-05	0.000113783	0.000924927	0.0012439	616
Otu0617	2394	Bacteria(100)-Firmicutes(100)-Clostridia(100)-Clostridiales(100)-Lachnospiraceae(100)-Acetitomaculum(100)-	1.15106e-05	1.39833e-05	1.1178e-05	2.51104e-05	1.89599e-05	2.18991e-05	617
Otu0618	12	Bacteria(100)-Firmicutes(100)-Clostridia(100)-Clostridiales(100)-Ruminococcaceae(100)-Hydrogenoanaerobacterium(100)-	1.92137e-06	3.12115e-06	0	0	8.20468e-07	2.46141e-06	618
Otu0619	16	Bacteria(100)-Firmicutes(100)-Clostridia(100)-Clostridiales(100)-Ruminococcaceae(100)-Acetanaerobacterium(100)-	3.29796e-06	4.60025e-06	0	0	8.20468e-07	2.46141e-06	619
Otu0620	674	Bacteria(100)-Firmicutes(100)-Clostridia(100)-Clostridiales(100)-Eubacteriaceae(100)-Eubacterium(100)-	8.29073e-05	4.73239e-05	0.000104904	3.61008e-05	9.37697e-05	5.57988e-05	620
Otu0621	14	Bacteria(100)-Firmicutes(100)-Clostridia(100)-Clostridiales(100)-Gracilibacteraceae(100)-Gracilibacter(100)-	3.11273e-06	6.57214e-06	1.22884e-06	3.88594e-06	9.91927e-06	1.82123e-05	621
Otu0622	9977	Bacteria(100)-Bacteroidetes(100)-Bacteroidia(100)-Bacteroidales(100)-Rikenellaceae(100)-Alistipes(100)-	0.00124091	0.000474409	0.0014983	0.000958479	0.00127847	0.000514011	622
Otu0623	159	Bacteria(100)-Firmicutes(100)-Clostridia(100)-Clostridiales(100)-Ruminococcaceae(100)-Hydrogenoanaerobacterium(100)-	2.64715e-05	3.82787e-05	1.67121e-05	2.64138e-05	1.75048e-05	2.41037e-05	623
Otu0624	1448	Bacteria(100)-Firmicutes(100)-Clostridia(100)-Clostridiales(100)-Lachnospiraceae(100)-Coprococcus(100)-	0.00032125	0.000919435	4.43085e-05	7.41912e-05	0.000159481	0.000158717	624
Otu0625	76	Bacteria(100)-Firmicutes(100)-Clostridia(100)-Clostridiales(100)-Lachnospiraceae(100)-Lachnospiracea_incertae_sedis(100)-	1.34611e-05	1.71933e-05	1.50179e-05	2.50675e-05	1.82536e-05	1.13567e-05	625
Otu0626	73	Bacteria(100)-Firmicutes(100)-Erysipelotrichia(100)-Erysipelotrichales(100)-Erysipelotrichaceae(100)-Holdemania(100)-	4.72578e-06	7.11981e-06	5.2807e-06	9.94779e-06	1.25114e-05	1.69027e-05	626
Otu0627	471	Bacteria(100)-Firmicutes(100)-Clostridia(100)-Clostridiales(100)-Lachnospiraceae(100)-Hespellia(100)-	3.37274e-05	3.91595e-05	6.68246e-06	1.06687e-05	0.000170986	0.000306296	627
Otu0628	122	Bacteria(100)-Firmicutes(100)-Erysipelotrichia(100)-Erysipelotrichales(100)-Erysipelotrichaceae(100)-Catenibacterium(100)-	1.14903e-06	3.63355e-06	1.42616e-05	4.5099e-05	5.837e-05	0.000145833	628
Otu0629	13	Bacteria(100)-Firmicutes(100)-Clostridia(100)-Clostridiales(100)-Clostridiales_Incertae_Sedis_XII(100)-Guggenheimella(100)-	0	0	7.44153e-06	1.64488e-05	0	0	629
Otu0630	783	Bacteria(100)-Firmicutes(100)-Clostridia(100)-Clostridiales(100)-Lachnospiraceae(100)-Clostridium_XlVb(100)-	0.000351373	0.000690118	0	0	0.000283747	0.000318273	630
Otu0631	53	Bacteria(100)-Firmicutes(100)-Clostridia(100)-Clostridiales(100)-Ruminococcaceae(100)-Oscillibacter(100)-	1.00615e-05	1.52044e-05	2.37183e-06	5.19694e-06	6.06523e-06	9.1566e-06	631
Otu0632	67	Bacteria(100)-Bacteroidetes(100)-Bacteroidia(100)-Bacteroidales(100)-Porphyromonadaceae(100)-Barnesiella(100)-	6.33028e-05	0.000136862	0	0	0	0	632
Otu0633	181	Bacteria(100)-Firmicutes(100)-Clostridia(100)-Clostridiales(100)-Clostridiales_Incertae_Sedis_XII(100)-Guggenheimella(100)-	3.29357e-05	2.28619e-05	1.42837e-05	2.06784e-05	3.46211e-05	3.98506e-05	633
Otu0634	825	Bacteria(100)-Firmicutes(100)-Bacilli(100)-Lactobacillales(100)-Streptococcaceae(100)-Streptococcus(100)-	7.24618e-05	5.85576e-05	0.000111225	3.82081e-05	0.000130632	7.46612e-05	634
Otu0635	124	Bacteria(100)-Firmicutes(100)-Clostridia(100)-Clostridiales(100)-Ruminococcaceae(100)-Flavonifractor(100)-	2.20465e-05	2.65696e-05	1.54948e-05	2.22118e-05	2.16523e-05	1.86112e-05	635
Otu0636	13443	Bacteria(100)-Firmicutes(100)-Clostridia(100)-Clostridiales(100)-Ruminococcaceae(100)-Sporobacter(100)-	0.00276457	0.00164264	0.0015998	0.000949051	0.00261682	0.00183696	636
Otu0637	20	Bacteria(100)-Firmicutes(100)-Clostridia(100)-Clostridiales(100)-Lachnospiraceae(100)-Clostridium_XlVb(100)-	2.56129e-06	4.22073e-06	2.71418e-06	4.09517e-06	4.89291e-06	7.6551e-06	637
Otu0638	107	Bacteria(100)-Proteobacteria(100)-Alphaproteobacteria(100)-Rickettsiales(100)-Rickettsiaceae(100)-Orientia(100)-	5.53794e-05	2.9482e-05	0	0	1.42774e-05	2.99475e-05	638
Otu0639	179	Bacteria(100)-Firmicutes(100)-Clostridia(100)-Clostridiales(100)-Clostridiaceae_1(100)-Anaerosporobacter(100)-	6.67789e-05	0.000211173	0	0	7.49e-05	0.00021882	639
Otu0640	50	Bacteria(100)-Firmicutes(100)-Clostridia(100)-Clostridiales(100)-Ruminococcaceae(100)-Anaerotruncus(100)-	4.6529e-06	8.3097e-06	6.56739e-06	9.23621e-06	8.74814e-06	2.31797e-05	640
Otu0641	176	Bacteria(100)-Firmicutes(100)-Clostridia(100)-Clostridiales(100)-Lachnospiraceae(100)-Robinsoniella(100)-	4.14047e-05	7.34858e-05	9.90889e-07	3.13347e-06	0.000105032	0.000232761	641
Otu0642	67	Bacteria(100)-Firmicutes(100)-Clostridia(100)-Clostridiales(100)-Ruminococcaceae(100)-Clostridium_IV(100)-	4.45952e-06	6.60892e-06	1.53979e-05	2.21447e-05	6.69719e-06	8.22135e-06	642
Otu0643	1796	Bacteria(100)-Firmicutes(100)-Clostridia(100)-Clostridiales(100)-Lachnospiraceae(100)-Lachnobacterium(100)-	0.000372735	0.000769235	0.000402329	0.000858556	0.000245385	0.000286128	643
Otu0644	1024	Bacteria(100)-Firmicutes(100)-Clostridia(100)-Clostridiales(100)-Lachnospiraceae(100)-Dorea(100)-	0.000156632	7.94986e-05	0.000163437	9.86577e-05	0.000128142	0.000111572	644
Otu0645	14	Bacteria(100)-Firmicutes(100)-Clostridia(100)-Clostridiales(100)-Ruminococcaceae(100)-Papillibacter(100)-	3.79346e-06	5.13131e-06	0	0	3.01773e-06	4.58817e-06	645
Otu0646	1116	Bacteria(100)-Firmicutes(100)-Erysipelotrichia(100)-Erysipelotrichales(100)-Erysipelotrichaceae(100)-Allobaculum(100)-	0.000441234	0.00137836	0.000276494	0.000758274	8.73306e-05	8.17133e-05	646
Otu0647	333	Bacteria(100)-Firmicutes(100)-Clostridia(100)-Clostridiales(100)-Clostridiales_Incertae_Sedis_XIII(100)-Mogibacterium(100)-	2.94384e-05	3.02483e-05	4.53564e-05	2.62426e-05	7.90741e-05	3.59665e-05	647
Otu0648	357	Bacteria(100)-Firmicutes(100)-Clostridia(100)-Clostridiales(100)-Lachnospiraceae(100)-Clostridium_XlVa(100)-	4.03533e-05	6.14725e-05	1.57182e-06	3.41155e-06	4.41626e-05	3.77176e-05	648
Otu0649	421	Bacteria(100)-Firmicutes(100)-Clostridia(100)-Clostridiales(100)-Ruminococcaceae(100)-Acetivibrio(100)-	0.000316296	0.000666442	0	0	0.00015852	0.000298677	649
Otu0650	11204	Bacteria(100)-Firmicutes(100)-Clostridia(100)-Clostridiales(100)-Lachnospiraceae(100)-Marvinbryantia(100)-	0.00181467	0.00207457	0.000725969	0.000761343	0.00198228	0.00185963	650
Otu0651	452	Bacteria(100)-Firmicutes(100)-Clostridia(100)-Clostridiales(100)-Ruminococcaceae(100)-Anaerotruncus(100)-	6.04977e-05	7.09364e-05	3.72214e-05	4.0717e-05	0.000102234	0.000101006	651
Otu0652	2820	Bacteria(100)-Firmicutes(100)-Clostridia(100)-Clostridiales(100)-Lachnospiraceae(100)-Acetitomaculum(100)-	0.000505964	0.000659859	0.000339887	0.000468792	0.00063498	0.00115339	652
Otu0653	2401	Bacteria(100)-Firmicutes(100)-Clostridia(100)-Clostridiales(100)-Ruminococcaceae(100)-Hydrogenoanaerobacterium(100)-	0.000436349	0.000275515	0.000251518	0.000246845	0.000294312	0.000111575	653
Otu0654	533	Bacteria(100)-Firmicutes(100)-Clostridia(100)-Clostridiales(100)-Lachnospiraceae(100)-Marvinbryantia(100)-	6.76066e-05	6.29745e-05	3.05565e-05	2.87157e-05	6.31503e-05	5.18639e-05	654
Otu0655	226	Bacteria(100)-Firmicutes(100)-Clostridia(100)-Clostridiales(100)-Ruminococcaceae(100)-Faecalibacterium(100)-	3.91376e-05	5.69069e-05	0	0	3.30514e-05	5.08502e-05	655
Otu0656	64	Bacteria(100)-Firmicutes(100)-Clostridia(100)-Clostridiales(100)-Ruminococcaceae(100)-Hydrogenoanaerobacterium(100)-	9.35291e-06	1.2421e-05	1.34999e-05	1.2562e-05	4.83411e-06	4.64741e-06	656
Otu0657	72	Bacteria(100)-Firmicutes(100)-Clostridia(100)-Clostridiales(100)-Ruminococcaceae(100)-Hydrogenoanaerobacterium(100)-	5.72376e-06	5.26101e-06	6.47992e-06	1.15449e-05	1.07889e-05	8.66092e-06	657
Otu0658	17	Bacteria(100)-Actinobacteria(100)-Actinobacteria(100)-Actinomycetales(100)-Corynebacteriaceae(100)-Corynebacterium(100)-	8.165e-07	2.582e-06	4.09249e-06	1.29416e-05	0	0	658
Otu0659	73	Bacteria(100)-Firmicutes(100)-Clostridia(100)-Clostridiales(100)-Peptococcaceae_1(100)-Peptococcus(100)-	0	0	1.24393e-05	2.71191e-05	4.98176e-06	1.49453e-05	659
Otu0660	189	Bacteria(100)-Firmicutes(100)-Clostridia(100)-Clostridiales(100)-Clostridiales_Incertae_Sedis_XII(100)-Guggenheimella(100)-	5.45326e-05	6.12063e-05	8.22544e-06	1.64992e-05	5.09391e-05	8.95783e-05	660
Otu0661	1045	Bacteria(100)-Firmicutes(100)-Clostridia(100)-Clostridiales(100)-Ruminococcaceae(100)-Ethanoligenens(100)-	0.00013095	7.64684e-05	0.000135244	0.000105022	0.000140144	4.7858e-05	661
Otu0662	8779	Bacteria(100)-Firmicutes(100)-Clostridia(100)-Clostridiales(100)-Lachnospiraceae(100)-Lachnospiracea_incertae_sedis(100)-	0.00189809	0.00403057	0.000271031	0.000407014	0.000733038	0.000771931	662
Otu0663	24	Bacteria(100)-Firmicutes(100)-Erysipelotrichia(100)-Erysipelotrichales(100)-Erysipelotrichaceae(100)-Bulleidia(100)-	1.09945e-05	1.94367e-05	0	0	9.00889e-06	1.28668e-05	663
Otu0664	1049	Bacteria(100)-Bacteroidetes(100)-Bacteroidia(100)-Bacteroidales(100)-Bacteroidaceae(100)-Anaerorhabdus(100)-	0.000189153	0.000142479	0.000140914	0.000125754	0.00011532	8.99701e-05	664
Otu0665	2785	Bacteria(100)-Firmicutes(100)-Clostridia(100)-Clostridiales(100)-Lachnospiraceae(100)-Lachnospiracea_incertae_sedis(100)-	0.000448674	0.000546499	0.000355689	0.000389574	0.000178261	0.000132479	665
Otu0666	17	Bacteria(100)-Firmicutes(100)-Clostridia(100)-Clostridiales(100)-Ruminococcaceae(100)-Clostridium_IV(100)-	6.06995e-07	1.91949e-06	1.10986e-06	2.35655e-06	4.14422e-06	8.27909e-06	666
Otu0667	417	Bacteria(100)-Bacteroidetes(100)-Bacteroidia(100)-Bacteroidales(100)-Porphyromonadaceae(100)-Tannerella(100)-	5.84514e-05	3.78847e-05	3.91599e-05	3.78408e-05	5.0793e-05	5.30313e-05	667
Otu0668	23	Bacteria(100)-Firmicutes(100)-Negativicutes(100)-Selenomonadales(100)-Veillonellaceae(100)-Anaerovibrio(100)-	1.9207e-05	4.27775e-05	0	0	0	0	668
Otu0669	139	Bacteria(100)-Firmicutes(100)-Clostridia(100)-Clostridiales(100)-Lachnospiraceae(100)-Robinsoniella(100)-	7.06418e-05	0.00010286	0	0	5.32565e-05	0.000120595	669
Otu0670	9682	Bacteria(100)-Bacteroidetes(100)-Bacteroidia(100)-Bacteroidales(100)-Porphyromonadaceae(100)-Barnesiella(100)-	0.00175877	0.00104493	0.00168584	0.000963761	0.00146678	0.000738128	670
Otu0671	1502	Bacteria(100)-Firmicutes(100)-Clostridia(100)-Clostridiales(100)-Ruminococcaceae(100)-Papillibacter(100)-	0.000283245	0.000227098	0.000260063	0.000157463	0.000104372	0.000106142	671
Otu0672	1328	Bacteria(100)-Proteobacteria(100)-Deltaproteobacteria(100)-Desulfovibrionales(100)-Desulfovibrionaceae(100)-Desulfovibrio(100)-	0.000345276	0.000262235	0.000162896	0.000138741	0.000130731	0.000136799	672
Otu0673	39	Bacteria(100)-Bacteroidetes(100)-Bacteroidia(100)-Bacteroidales(100)-Porphyromonadaceae(100)-Parabacteroides(100)-	0	0	3.06937e-06	9.70619e-06	1.92101e-06	5.76302e-06	673
Otu0674	13875	Bacteria(100)-Bacteroidetes(100)-Bacteroidia(100)-Bacteroidales(100)-Porphyromonadaceae(100)-Barnesiella(100)-	0.00230227	0.00088762	0.00187958	0.000831726	0.00173002	0.000647298	674
Otu0675	36	Bacteria(100)-Firmicutes(100)-Clostridia(100)-Clostridiales(100)-Lachnospiraceae(100)-Roseburia(100)-	1.47348e-05	2.31965e-05	0	0	2.46267e-05	2.8562e-05	675
Otu0676	242	Bacteria(100)-Proteobacteria(100)-Deltaproteobacteria(100)-Bdellovibrionales(100)-Bdellovibrionaceae(100)-Vampirovibrio(100)-	6.02531e-06	8.26783e-06	2.05423e-05	3.65038e-05	0.000154945	0.000228027	676
Otu0677	11	Bacteria(100)-Proteobacteria(100)-Betaproteobacteria(100)-Burkholderiales(100)-Alcaligenaceae(100)-Achromobacter(100)-	0	0	1.60531e-06	3.49868e-06	0	0	677
Otu0678	366	Bacteria(100)-Firmicutes(100)-Clostridia(100)-Clostridiales(100)-Lachnospiraceae(100)-Johnsonella(100)-	0.000109272	0.000169401	3.80896e-05	4.82573e-05	5.2677e-05	4.55749e-05	678
Otu0679	23	Bacteria(100)-Firmicutes(100)-Bacilli(100)-Bacillales(100)-Staphylococcaceae(100)-Staphylococcus(100)-	2.94072e-06	5.1882e-06	6.1442e-07	1.94297e-06	1.34701e-05	2.52776e-05	679
Otu0680	46	Bacteria(100)-Firmicutes(100)-Clostridia(100)-Clostridiales(100)-Clostridiales_Incertae_Sedis_XII(100)-Guggenheimella(100)-	7.20499e-06	6.88099e-06	6.52327e-06	1.07216e-05	3.94956e-06	9.06936e-06	680
Otu0681	171	Bacteria(100)-Firmicutes(100)-Clostridia(100)-Clostridiales(100)-Lachnospiraceae(100)-Johnsonella(100)-	7.71463e-06	1.32124e-05	6.04905e-06	7.18496e-06	1.64094e-06	4.92281e-06	681
Otu0682	557	Bacteria(100)-Firmicutes(100)-Clostridia(100)-Clostridiales(100)-Lachnospiraceae(100)-Lachnospiracea_incertae_sedis(100)-	7.33267e-05	4.6332e-05	7.68925e-05	6.38975e-05	8.23953e-05	4.19413e-05	682
Otu0683	226	Bacteria(100)-Firmicutes(100)-Clostridia(100)-Clostridiales(100)-Clostridiales_Incertae_Sedis_XII(100)-Guggenheimella(100)-	5.26199e-06	9.92439e-06	4.80194e-05	7.40211e-05	1.95687e-05	3.1738e-05	683
Otu0684	727	Bacteria(100)-Firmicutes(100)-Clostridia(100)-Clostridiales(100)-Lachnospiraceae(100)-Clostridium_XlVb(100)-	2.20634e-05	3.16262e-05	8.33792e-05	0.000171502	4.96113e-05	3.71058e-05	684
Otu0685	1283	Bacteria(100)-Bacteroidetes(100)-Bacteroidia(100)-Bacteroidales(100)-Rikenellaceae(100)-Alistipes(100)-	0	0	0.000132506	0.000221675	0.000138177	0.000114384	685
Otu0686	227	Bacteria(100)-Firmicutes(100)-Clostridia(100)-Clostridiales(100)-Ruminococcaceae(100)-Anaerotruncus(100)-	2.22785e-05	1.38741e-05	2.67899e-05	1.85044e-05	5.0297e-05	3.54683e-05	686
Otu0687	1219	Bacteria(100)-Firmicutes(100)-Clostridia(100)-Clostridiales(100)-Clostridiaceae_1(100)-Fervidicella(100)-	0.000123812	0.000176384	0.000100235	0.000101474	0.000394642	0.000957684	687
Otu0688	93	Bacteria(100)-Firmicutes(100)-Clostridia(100)-Clostridiales(100)-Lachnospiraceae(100)-Acetitomaculum(100)-	4.83044e-05	0.000103236	0	0	1.56682e-05	4.05797e-05	688
Otu0689	147	Bacteria(100)-Proteobacteria(100)-Alphaproteobacteria(100)-Caulobacterales(100)-Hyphomonadaceae(100)-Woodsholea(100)-	3.13472e-05	4.68261e-05	1.58091e-05	1.84298e-05	3.31874e-05	3.28145e-05	689
Otu0690	112	Bacteria(100)-Firmicutes(100)-Clostridia(100)-Clostridiales(100)-Clostridiales_Incertae_Sedis_XII(100)-Guggenheimella(100)-	2.06869e-05	3.45864e-05	1.46241e-05	3.0584e-05	2.45528e-05	6.10467e-05	690
Otu0691	514	Bacteria(100)-Proteobacteria(100)-Alphaproteobacteria(100)-Rhodospirillales(100)-Rhodospirillaceae(100)-Dongia(100)-	6.82543e-05	0.00012485	4.17689e-05	6.22009e-05	9.77523e-05	8.72742e-05	691
Otu0692	46	Bacteria(100)-Proteobacteria(100)-Deltaproteobacteria(100)-Desulfovibrionales(100)-Desulfovibrionaceae(100)-Bilophila(100)-	1.07122e-05	1.08611e-05	0	0	6.95123e-06	9.67759e-06	692
Otu0693	85	Bacteria(100)-Firmicutes(100)-Clostridia(100)-Clostridiales(100)-Lachnospiraceae(100)-Dorea(100)-	5.62979e-06	6.44128e-06	2.49533e-05	2.603e-05	1.10569e-05	1.30205e-05	693
Otu0694	64	Bacteria(100)-Firmicutes(100)-Clostridia(100)-Clostridiales(100)-Lachnospiraceae(100)-Parasporobacterium(100)-	0	0	2.63154e-05	6.2388e-05	0	0	694
Otu0695	208	Bacteria(100)-Firmicutes(100)-Clostridia(100)-Clostridiales(100)-Lachnospiraceae(100)-Clostridium_XlVb(100)-	9.13485e-05	0.000118033	0	0	7.92926e-05	0.000227963	695
Otu0696	12	Bacteria(100)-Firmicutes(100)-Clostridia(100)-Clostridiales(100)-Ruminococcaceae(100)-Fastidiosipila(100)-	0	0	9.89895e-07	2.08835e-06	2.74272e-06	8.22815e-06	696
Otu0697	10	Bacteria(100)-Firmicutes(100)-Clostridia(100)-Clostridiales(100)-Ruminococcaceae(100)-Anaerotruncus(100)-	5.74515e-07	1.81677e-06	0	0	6.39865e-06	1.41162e-05	697
Otu0698	36	Bacteria(100)-Firmicutes(100)-Clostridia(100)-Clostridiales(100)-Ruminococcaceae(100)-Anaerofilum(100)-	3.1629e-06	4.35065e-06	7.48907e-06	1.02574e-05	4.58057e-06	7.22003e-06	698
Otu0699	56	Bacteria(100)-Firmicutes(100)-Clostridia(100)-Clostridiales(100)-Ruminococcaceae(100)-Clostridium_IV(100)-	1.34736e-05	1.34372e-05	4.73321e-06	9.86863e-06	1.3238e-05	1.95186e-05	699
Otu0700	14	Bacteria(100)-Firmicutes(100)-Clostridia(100)-Clostridiales(100)-Clostridiaceae_1(100)-Anaerosporobacter(100)-	0	0	0	0	0	0	700
Otu0701	2329	Bacteria(100)-Firmicutes(100)-Clostridia(100)-Clostridiales(100)-Ruminococcaceae(100)-Sporobacter(100)-	0.00025863	0.000114813	0.000359587	6.84998e-05	0.000359049	9.33689e-05	701
Otu0702	304	Bacteria(100)-Firmicutes(100)-Clostridia(100)-Clostridiales(100)-Clostridiaceae_1(100)-Anaerosporobacter(100)-	3.77483e-05	2.75998e-05	3.11299e-05	2.23747e-05	8.12587e-05	6.15345e-05	702
Otu0703	34	Bacteria(100)-Proteobacteria(100)-Gammaproteobacteria(100)-Enterobacteriales(100)-Enterobacteriaceae(100)-Proteus(100)-	0	0	0	0	3.10555e-06	6.98818e-06	703
Otu0704	5488	Bacteria(100)-Firmicutes(100)-Negativicutes(100)-Selenomonadales(100)-Veillonellaceae(100)-Dendrosporobacter(100)-	0.00124201	0.00137951	0.000698148	0.000930171	0.000845836	0.000956955	704
Otu0705	79	Bacteria(100)-Proteobacteria(100)-Alphaproteobacteria(100)-Rhodospirillales(100)-Rhodospirillaceae(100)-Dongia(100)-	2.52784e-05	5.17225e-05	0	0	6.6884e-05	7.33181e-05	705
Otu0706	2262	Bacteria(100)-Firmicutes(100)-Clostridia(100)-Clostridiales(100)-Lachnospiraceae(100)-Lactonifactor(100)-	0.000263888	0.000264665	0.000280505	0.000345216	0.000642033	0.000636064	706
Otu0707	77	Bacteria(100)-Firmicutes(100)-Clostridia(100)-Clostridiales(100)-Ruminococcaceae(100)-Oscillibacter(100)-	1.40583e-05	1.83616e-05	4.74641e-06	7.36378e-06	3.98541e-06	1.19562e-05	707
Otu0708	246	Bacteria(100)-Firmicutes(100)-Clostridia(100)-Clostridiales(100)-Ruminococcaceae(100)-Ruminococcus(100)-	3.26065e-05	8.42317e-05	3.81446e-05	8.71789e-05	4.61151e-05	5.74538e-05	708
Otu0709	399	Bacteria(100)-Firmicutes(100)-Clostridia(100)-Clostridiales(100)-Ruminococcaceae(100)-Clostridium_IV(100)-	9.38566e-05	4.44944e-05	3.79759e-05	3.34464e-05	4.35671e-05	2.12688e-05	709
Otu0710	318	Bacteria(100)-Firmicutes(100)-Clostridia(100)-Clostridiales(100)-Lachnospiraceae(100)-Syntrophococcus(100)-	1.65749e-05	1.94669e-05	8.32532e-05	0.000148213	6.23642e-05	0.000123689	710
Otu0711	461	Bacteria(100)-Firmicutes(100)-Erysipelotrichia(100)-Erysipelotrichales(100)-Erysipelotrichaceae(100)-Erysipelotrichaceae_incertae_sedis(100)-	3.6681e-05	4.1326e-05	7.27763e-05	4.41907e-05	5.41082e-05	4.08471e-05	711
Otu0712	1011	Bacteria(100)-Firmicutes(100)-Clostridia(100)-Clostridiales(100)-Ruminococcaceae(100)-Clostridium_IV(100)-	0.000166644	7.03026e-05	0.000122832	4.43762e-05	0.000118421	6.36973e-05	712
Otu0713	2521	Bacteria(100)-Actinobacteria(100)-Actinobacteria(100)-Coriobacteriales(100)-Coriobacteriaceae(100)-Enterorhabdus(100)-	0.000648867	0.000375118	0.000430639	0.000285421	0.000228929	0.000165623	713
Otu0714	229	Bacteria(100)-Firmicutes(100)-Clostridia(100)-Clostridiales(100)-Lachnospiraceae(100)-Lachnospiracea_incertae_sedis(100)-	1.78022e-05	1.36525e-05	4.21621e-05	5.88064e-05	2.14519e-05	3.63513e-05	714
Otu0715	1365	Bacteria(100)-Proteobacteria(100)-Deltaproteobacteria(100)-Desulfovibrionales(100)-Desulfomicrobiaceae(100)-Desulfomicrobium(100)-	0.000221684	0.000196396	0.000158796	0.000131698	0.000159272	0.000121784	715
Otu0716	314	Bacteria(100)-Proteobacteria(100)-Alphaproteobacteria(100)-Rickettsiales(100)-Rickettsiaceae(100)-Orientia(100)-	4.32957e-05	3.78181e-05	6.17337e-05	6.87533e-05	6.25111e-05	4.72587e-05	716
Otu0717	2423	Bacteria(100)-Firmicutes(100)-Clostridia(100)-Clostridiales(100)-Ruminococcaceae(100)-Clostridium_IV(100)-	0.000117833	0.0001602	0.000215999	0.000170918	0.000442725	0.000177849	717
Otu0718	45	Bacteria(100)-Firmicutes(100)-Clostridia(100)-Clostridiales(100)-Ruminococcaceae(100)-Ruminococcus(100)-	5.74263e-06	6.99945e-06	1.40703e-05	1.91313e-05	5.28676e-06	1.10683e-05	718
Otu0719	135	Bacteria(100)-Firmicutes(100)-Clostridia(100)-Clostridiales(100)-Clostridiales_Incertae_Sedis_XII(100)-Acidaminobacter(100)-	3.31316e-05	3.6815e-05	8.26018e-06	1.19387e-05	3.55624e-05	3.4443e-05	719
Otu0720	24	Bacteria(100)-Actinobacteria(100)-Actinobacteria(100)-Coriobacteriales(100)-Coriobacteriaceae(100)-Paraeggerthella(100)-	4.238e-06	8.17028e-06	1.67214e-06	3.90777e-06	3.93876e-06	4.68176e-06	720
Otu0721	422	Bacteria(100)-Firmicutes(100)-Clostridia(100)-Clostridiales(100)-Ruminococcaceae(100)-Papillibacter(100)-	0.000123348	7.81266e-05	4.69531e-05	3.3951e-05	4.09439e-05	3.60201e-05	721
Otu0722	64	Bacteria(100)-Firmicutes(100)-Clostridia(100)-Clostridiales(100)-Lachnospiraceae(100)-Clostridium_XlVa(100)-	1.61817e-05	2.0256e-05	7.95961e-06	1.11705e-05	5.69636e-06	7.4586e-06	722
Otu0723	358	Bacteria(100)-Firmicutes(100)-Clostridia(100)-Clostridiales(100)-Ruminococcaceae(100)-Pseudoflavonifractor(100)-	5.88046e-05	4.19588e-05	5.14271e-05	4.29598e-05	3.56453e-05	2.43098e-05	723
Otu0724	273	Bacteria(100)-Firmicutes(100)-Clostridia(100)-Clostridiales(100)-Lachnospiraceae(100)-Lachnospira(100)-	5.68115e-05	5.98244e-05	2.95699e-05	4.0056e-05	3.22989e-05	3.59182e-05	724
Otu0725	1225	Bacteria(100)-Firmicutes(100)-Clostridia(100)-Clostridiales(100)-Lachnospiraceae(100)-Butyrivibrio(100)-	0.000118263	0.000125941	0.000287976	0.000294112	9.60383e-05	5.38072e-05	725
Otu0726	91	Bacteria(100)-Firmicutes(100)-Clostridia(100)-Clostridiales(100)-Ruminococcaceae(100)-Clostridium_III(100)-	3.6457e-05	3.22454e-05	0	0	4.34523e-05	3.68112e-05	726
Otu0727	18	Bacteria(100)-Firmicutes(100)-Clostridia(100)-Clostridiales(100)-Lachnospiraceae(100)-Shuttleworthia(100)-	4.969e-06	1.19387e-05	0	0	1.18085e-05	2.59183e-05	727
Otu0728	188	Bacteria(100)-Firmicutes(100)-Clostridia(100)-Clostridiales(100)-Lachnospiraceae(100)-Lachnospiracea_incertae_sedis(100)-	0.000130261	0.00012117	0	0	1.49894e-05	1.51506e-05	728
Otu0729	99	Bacteria(100)-Firmicutes(100)-Clostridia(100)-Clostridiales(100)-Clostridiaceae_1(100)-Anaerosporobacter(100)-	1.00409e-05	1.06035e-05	1.5467e-05	3.78662e-05	4.1311e-05	4.90016e-05	729
Otu0730	339	Bacteria(100)-Firmicutes(100)-Clostridia(100)-Clostridiales(100)-Ruminococcaceae(100)-Anaerofilum(100)-	0.000111853	0.000120641	1.72131e-05	3.18269e-05	0.000131181	6.9815e-05	730
Otu0731	433	Bacteria(100)-Proteobacteria(100)-Alphaproteobacteria(100)-Rickettsiales(100)-Rickettsiaceae(100)-Orientia(100)-	4.57404e-05	4.65936e-05	3.35525e-05	6.27819e-05	0.000112798	0.00014235	731
Otu0732	1465	Bacteria(100)-Firmicutes(100)-Clostridia(100)-Clostridiales(100)-Lachnospiraceae(100)-Robinsoniella(100)-	0.000357776	0.00069864	2.58631e-05	5.984e-05	0.000432222	0.000728225	732
Otu0733	213	Bacteria(100)-Firmicutes(100)-Clostridia(100)-Clostridiales(100)-Lachnospiraceae(100)-Parasporobacterium(100)-	8.10258e-05	0.000158577	0	0	0.000122567	0.000120471	733
Otu0734	17	Bacteria(100)-Firmicutes(100)-Clostridia(100)-Clostridiales(100)-Ruminococcaceae(100)-Clostridium_IV(100)-	2.23999e-06	5.30552e-06	1.45211e-06	3.24862e-06	8.70817e-06	1.24586e-05	734
Otu0735	328	Bacteria(100)-Firmicutes(100)-Clostridia(100)-Clostridiales(100)-Lachnospiraceae(100)-Lachnospiracea_incertae_sedis(100)-	4.3633e-05	6.19356e-05	6.19017e-05	8.59704e-05	6.24168e-05	8.10309e-05	735
Otu0736	13	Bacteria(100)-Firmicutes(100)-Clostridia(100)-Clostridiales(100)-Ruminococcaceae(100)-Clostridium_IV(100)-	6.91647e-06	8.94901e-06	0	0	1.64094e-06	4.92281e-06	736
Otu0737	463	Bacteria(100)-Firmicutes(100)-Clostridia(100)-Clostridiales(100)-Lachnospiraceae(100)-Syntrophococcus(100)-	3.70345e-05	4.11485e-05	0.000147464	0.000351735	3.30001e-05	2.91778e-05	737
Otu0738	63	Bacteria(100)-Firmicutes(100)-Clostridia(100)-Clostridiales(100)-Ruminococcaceae(100)-Ethanoligenens(100)-	2.96851e-06	7.5011e-06	5.91974e-06	9.11724e-06	5.70115e-06	1.21608e-05	738
Otu0739	135	Bacteria(100)-Proteobacteria(100)-Alphaproteobacteria(100)-Rhizobiales(100)-Hyphomicrobiaceae(100)-Gemmiger(100)-	2.35162e-05	3.43704e-05	9.13727e-06	1.89919e-05	2.56318e-05	1.70312e-05	739
Otu0740	979	Bacteria(100)-Firmicutes(100)-Clostridia(100)-Clostridiales(100)-Lachnospiraceae(100)-Clostridium_XlVb(100)-	6.37946e-05	7.80989e-05	0.000259876	0.000346212	0.000103993	0.000160335	740
Otu0741	10592	Bacteria(100)-Bacteroidetes(100)-Bacteroidia(100)-Bacteroidales(100)-Porphyromonadaceae(100)-Odoribacter(100)-	4.53538e-06	7.11767e-06	0.00188251	0.00178285	8.64454e-06	2.59336e-05	741
Otu0742	15691	Bacteria(100)-Firmicutes(100)-Bacilli(100)-Lactobacillales(100)-Streptococcaceae(100)-Streptococcus(100)-	0.000706511	0.000657459	0.00312897	0.00228218	0.00248751	0.00247271	742
Otu0743	1876	Bacteria(100)-Firmicutes(100)-Clostridia(100)-Clostridiales(100)-Lachnospiraceae(100)-Lachnospiracea_incertae_sedis(100)-	0.000198563	0.000372187	0.000403848	0.000436714	0.000523036	0.000447124	743
Otu0744	546	Bacteria(100)-Proteobacteria(100)-Gammaproteobacteria(100)-Enterobacteriales(100)-Enterobacteriaceae(100)-Escherichia_Shigella(100)-	3.13142e-05	3.26264e-05	8.17544e-06	1.77767e-05	0.000174042	0.000212469	744
Otu0745	59	Bacteria(100)-Firmicutes(100)-Clostridia(100)-Clostridiales(100)-Lachnospiraceae(100)-Lachnospiracea_incertae_sedis(100)-	9.32986e-06	1.04564e-05	1.14671e-05	9.55404e-06	4.16706e-06	4.95897e-06	745
Otu0746	125	Bacteria(100)-Firmicutes(100)-Clostridia(100)-Clostridiales(100)-Lachnospiraceae(100)-Clostridium_XlVa(100)-	3.45889e-05	7.11269e-05	4.95444e-07	1.56673e-06	2.74496e-05	4.33397e-05	746
Otu0747	925	Bacteria(100)-Firmicutes(100)-Clostridia(100)-Clostridiales(100)-Lachnospiraceae(100)-Lachnospiracea_incertae_sedis(100)-	2.48066e-05	5.01794e-05	9.73778e-07	2.0533e-06	0	0	747
Otu0748	2075	Bacteria(100)-Firmicutes(100)-Clostridia(100)-Clostridiales(100)-Lachnospiraceae(100)-Lachnospiracea_incertae_sedis(100)-	0.000371948	0.000420612	0.00033001	0.000267489	0.0005438	0.000365984	748
Otu0749	32	Bacteria(100)-Firmicutes(100)-Clostridia(100)-Clostridiales(100)-Lachnospiraceae(100)-Clostridium_XlVa(100)-	3.23737e-06	7.17508e-06	0	0	9.60504e-07	2.88151e-06	749
Otu0750	30	Bacteria(100)-Firmicutes(100)-Clostridia(100)-Clostridiales(100)-Lachnospiraceae(100)-Blautia(100)-	3.997e-06	1.04668e-05	1.19883e-06	3.79102e-06	1.38936e-05	3.00057e-05	750
Otu0751	526	Bacteria(100)-Firmicutes(100)-Erysipelotrichia(100)-Erysipelotrichales(100)-Erysipelotrichaceae(100)-Bulleidia(100)-	8.5391e-05	8.08667e-05	7.84889e-05	7.64337e-05	5.28733e-05	8.61502e-05	751
Otu0752	251	Bacteria(100)-Firmicutes(100)-Erysipelotrichia(100)-Erysipelotrichales(100)-Erysipelotrichaceae(100)-Holdemania(100)-	9.7255e-05	0.000261422	2.45522e-06	7.7641e-06	2.69551e-05	3.72888e-05	752
Otu0753	632	Bacteria(100)-Firmicutes(100)-Clostridia(100)-Clostridiales(100)-Clostridiales_Incertae_Sedis_XII(100)-Guggenheimella(100)-	4.73824e-05	4.09718e-05	5.55119e-05	6.18324e-05	8.67052e-05	9.56517e-05	753
Otu0754	107	Bacteria(100)-Firmicutes(100)-Clostridia(100)-Clostridiales(100)-Clostridiales_Incertae_Sedis_XII(100)-Guggenheimella(100)-	9.07834e-06	1.71848e-05	2.16064e-05	2.29469e-05	1.9927e-06	5.97811e-06	754
Otu0755	154	Bacteria(100)-Firmicutes(100)-Bacilli(100)-Lactobacillales(100)-Lactobacillaceae(100)-Paralactobacillus(100)-	6.59268e-06	1.08822e-05	2.65504e-05	2.92716e-05	3.01157e-06	4.52242e-06	755
Otu0756	900	Bacteria(100)-Bacteroidetes(100)-Bacteroidia(100)-Bacteroidales(100)-Porphyromonadaceae(100)-Barnesiella(100)-	0.000109639	0.000165143	0	0	2.86737e-05	4.00201e-05	756
Otu0757	1007	Bacteria(100)-Actinobacteria(100)-Actinobacteria(100)-Coriobacteriales(100)-Coriobacteriaceae(100)-Paraeggerthella(100)-	0.000166319	0.000111036	0.000189674	7.48372e-05	0.000129123	4.26089e-05	757
Otu0758	30	Bacteria(100)-Firmicutes(100)-Clostridia(100)-Clostridiales(100)-Ruminococcaceae(100)-Ruminococcus(100)-	7.05658e-06	1.50572e-05	1.91334e-06	6.0505e-06	1.20607e-05	1.94243e-05	758
Otu0759	33	Bacteria(100)-Firmicutes(100)-Clostridia(100)-Clostridiales(100)-Lachnospiraceae(100)-Clostridium_XlVb(100)-	0	0	1.84142e-06	5.82307e-06	0	0	759
Otu0760	577	Bacteria(100)-Firmicutes(100)-Clostridia(100)-Clostridiales(100)-Lachnospiraceae(100)-Hespellia(100)-	0.000115562	0.000155909	5.1573e-05	6.74487e-05	0.000148874	0.000118074	760
Otu0761	5764	Bacteria(100)-Firmicutes(100)-Clostridia(100)-Clostridiales(100)-Lachnospiraceae(100)-Anaerostipes(100)-	0.00115497	0.00150773	0.00134333	0.0017114	7.58411e-05	9.36038e-05	761
Otu0762	24	Bacteria(100)-Firmicutes(100)-Clostridia(100)-Clostridiales(100)-Ruminococcaceae(100)-Clostridium_IV(100)-	9.17034e-06	1.14049e-05	2.6823e-06	4.65931e-06	2.63729e-06	5.43046e-06	762
Otu0763	331	Bacteria(100)-Firmicutes(100)-Clostridia(100)-Clostridiales(100)-Ruminococcaceae(100)-Clostridium_IV(100)-	6.41031e-05	4.68047e-05	3.52769e-05	2.3462e-05	4.61217e-05	2.79313e-05	763
Otu0764	10	Bacteria(100)-Firmicutes(100)-Clostridia(100)-Clostridiales(100)-Ruminococcaceae(100)-Acetanaerobacterium(100)-	0	0	1.01868e-06	3.22136e-06	8.28844e-06	1.65582e-05	764
Otu0765	1865	Bacteria(100)-Firmicutes(100)-Clostridia(100)-Clostridiales(100)-Lachnospiraceae(100)-Lachnospiracea_incertae_sedis(100)-	0.000655187	0.00159685	0.000344499	0.000926583	0.000245694	0.000263238	765
Otu0766	6503	Bacteria(100)-Firmicutes(100)-Clostridia(100)-Clostridiales(100)-Ruminococcaceae(100)-Ruminococcus(100)-	0.000257205	0.000486311	0.00067324	0.000649598	0.000149	0.000112455	766
Otu0767	10	Bacteria(100)-Firmicutes(100)-Clostridia(100)-Clostridiales(100)-Lachnospiraceae(100)-Clostridium_XlVa(100)-	6.81417e-06	2.15483e-05	0	0	0	0	767
Otu0768	291	Bacteria(100)-Firmicutes(100)-Clostridia(100)-Clostridiales(100)-Lachnospiraceae(100)-Johnsonella(100)-	6.26268e-05	3.60432e-05	2.14406e-05	2.54048e-05	3.59092e-05	3.04955e-05	768
Otu0769	390	Bacteria(100)-Firmicutes(100)-Clostridia(100)-Clostridiales(100)-Ruminococcaceae(100)-Oscillibacter(100)-	3.20833e-05	4.70486e-05	2.19871e-05	1.85567e-05	8.91463e-05	6.07167e-05	769
Otu0770	1188	Bacteria(100)-Firmicutes(100)-Clostridia(100)-Clostridiales(100)-Eubacteriaceae(100)-Eubacterium(100)-	0.000131546	5.26646e-05	0.000183637	5.77144e-05	0.000212786	6.38838e-05	770
Otu0771	13	Bacteria(100)-Firmicutes(100)-Clostridia(100)-Clostridiales(100)-Lachnospiraceae(100)-Syntrophococcus(100)-	6.70895e-06	1.25691e-05	0	0	3.90992e-06	6.41974e-06	771
Otu0772	954	Bacteria(100)-Firmicutes(100)-Clostridia(100)-Clostridiales(100)-Ruminococcaceae(100)-Clostridium_IV(100)-	0.000155188	0.000177035	0.000156207	0.000105192	6.25964e-05	2.86652e-05	772
Otu0773	29	Bacteria(100)-Firmicutes(100)-Bacilli(100)-Lactobacillales(100)-Streptococcaceae(100)-Streptococcus(100)-	0	0	3.11882e-06	5.42725e-06	8.18292e-06	1.13445e-05	773
Otu0774	2082	Bacteria(100)-Firmicutes(100)-Clostridia(100)-Clostridiales(100)-Lachnospiraceae(100)-Lachnospiracea_incertae_sedis(100)-	0.000381479	0.000561857	8.14201e-05	0.000191787	0.00054935	0.000960017	774
Otu0775	5609	Bacteria(100)-Firmicutes(100)-Clostridia(100)-Clostridiales(100)-Ruminococcaceae(100)-Ruminococcus(100)-	0.00310591	0.00981943	7.08653e-05	0.00020893	1.05472e-06	3.16415e-06	775
Otu0776	15	Bacteria(100)-Firmicutes(100)-Clostridia(100)-Clostridiales(100)-Ruminococcaceae(100)-Papillibacter(100)-	5.60368e-06	9.28222e-06	1.09486e-06	2.32113e-06	0	0	776
Otu0777	2468	Bacteria(100)-Firmicutes(100)-Clostridia(100)-Clostridiales(100)-Lachnospiraceae(100)-Clostridium_XlVa(100)-	0.000980575	0.00285732	5.31457e-05	8.49041e-05	0.000198222	0.000184984	777
Otu0778	1819	Bacteria(100)-Firmicutes(100)-Clostridia(100)-Clostridiales(100)-Lachnospiraceae(100)-Lactonifactor(100)-	0.000111934	0.000117728	0.000300334	0.000477025	0.000641541	0.000624361	778
Otu0779	238	Bacteria(100)-Firmicutes(100)-Clostridia(100)-Clostridiales(100)-Lachnospiraceae(100)-Coprococcus(100)-	3.17628e-05	7.81458e-05	0	0	0.000198298	0.000427933	779
Otu0780	372	Bacteria(100)-Firmicutes(100)-Clostridia(100)-Clostridiales(100)-Ruminococcaceae(100)-Sporobacter(100)-	6.19016e-05	5.18658e-05	4.97579e-05	4.55041e-05	7.24358e-05	5.78301e-05	780
Otu0781	148	Bacteria(100)-Firmicutes(100)-Clostridia(100)-Clostridiales(100)-Ruminococcaceae(100)-Anaerotruncus(100)-	5.78938e-06	8.99238e-06	4.50164e-05	7.57498e-05	5.26334e-06	8.58037e-06	781
Otu0782	209	Bacteria(100)-Firmicutes(100)-Clostridia(100)-Clostridiales(100)-Lachnospiraceae(100)-Acetitomaculum(100)-	9.88527e-05	0.000115116	0	0	8.4066e-05	8.0896e-05	782
Otu0783	187	Bacteria(100)-Firmicutes(100)-Clostridia(100)-Clostridiales(100)-Lachnospiraceae(100)-Lachnospiracea_incertae_sedis(100)-	1.63806e-05	1.12247e-05	2.28432e-05	1.69896e-05	1.38336e-05	1.9597e-05	783
Otu0784	11	Bacteria(100)-Firmicutes(100)-Clostridia(100)-Clostridiales(100)-Lachnospiraceae(100)-Clostridium_XlVa(100)-	1.18151e-06	2.49202e-06	0	0	2.61439e-06	5.40079e-06	784
Otu0785	117	Bacteria(100)-Firmicutes(100)-Clostridia(100)-Clostridiales(100)-Ruminococcaceae(100)-Flavonifractor(100)-	0	0	0	0	0	0	785
Otu0786	15	Bacteria(100)-Proteobacteria(100)-Alphaproteobacteria(100)-Rhizobiales(100)-Hyphomicrobiaceae(100)-Gemmiger(100)-	5.16726e-06	1.01467e-05	1.98078e-06	3.46411e-06	0	0	786
Otu0787	298	Bacteria(100)-Firmicutes(100)-Clostridia(100)-Clostridiales(100)-Lachnospiraceae(100)-Sporobacterium(100)-	9.37196e-05	0.0001206	2.10661e-05	5.35906e-05	3.62756e-05	2.56641e-05	787
Otu0788	100	Bacteria(100)-Firmicutes(100)-Clostridia(100)-Clostridiales(100)-Lachnospiraceae(100)-Lachnospiracea_incertae_sedis(100)-	2.1754e-05	1.82393e-05	7.07623e-06	1.26321e-05	2.85356e-05	2.2202e-05	788
Otu0789	239	Bacteria(100)-Firmicutes(100)-Clostridia(100)-Clostridiales(100)-Lachnospiraceae(100)-Pseudobutyrivibrio(100)-	6.53019e-05	7.29773e-05	2.66441e-05	2.54152e-05	2.3519e-05	3.7969e-05	789
Otu0790	5147	Bacteria(100)-Tenericutes(100)-Mollicutes(100)-Anaeroplasmatales(100)-Anaeroplasmataceae(100)-Anaeroplasma(100)-	1.04417e-06	3.30195e-06	0.000110004	0.000223035	0	0	790
Otu0791	98	Bacteria(100)-Proteobacteria(100)-Gammaproteobacteria(100)-Methylococcales(100)-Methylococcaceae(100)-Methylosphaera(100)-	2.26849e-05	3.68662e-05	8.69857e-06	1.80071e-05	6.81774e-06	1.71828e-05	791
Otu0792	35	Bacteria(100)-Firmicutes(100)-Clostridia(100)-Clostridiales(100)-Ruminococcaceae(100)-Sporobacter(100)-	3.91878e-06	7.15702e-06	2.66519e-06	4.65035e-06	1.08172e-05	1.21263e-05	792
Otu0793	16	Bacteria(100)-Firmicutes(100)-Clostridia(100)-Clostridiales(100)-Lachnospiraceae(100)-Dorea(100)-	8.11078e-06	2.29237e-05	0	0	1.82848e-06	5.48543e-06	793
Otu0794	23	Bacteria(100)-Proteobacteria(100)-Gammaproteobacteria(100)-Pseudomonadales(100)-Pseudomonadaceae(100)-Pseudomonas(100)-	3.01736e-06	3.946e-06	2.31917e-06	4.11739e-06	7.35365e-06	1.72296e-05	794
Otu0795	668	Bacteria(100)-Firmicutes(100)-Clostridia(100)-Clostridiales(100)-Lachnospiraceae(100)-Lachnospiracea_incertae_sedis(100)-	9.55903e-05	0.000166222	2.39534e-05	3.34104e-05	0.000165466	0.000169719	795
Otu0796	205	Bacteria(100)-Firmicutes(100)-Clostridia(100)-Clostridiales(100)-Lachnospiraceae(100)-Lachnospiracea_incertae_sedis(100)-	2.21959e-06	7.01896e-06	0	0	0.000190482	0.000435816	796
Otu0797	33	Bacteria(100)-Firmicutes(100)-Bacilli(100)-Lactobacillales(100)-Aerococcaceae(100)-Abiotrophia(100)-	9.39751e-06	2.97176e-05	0	0	2.33185e-05	3.93837e-05	797
Otu0798	75	Bacteria(100)-Firmicutes(100)-Clostridia(100)-Clostridiales(100)-Clostridiales_Incertae_Sedis_XII(100)-Acidaminobacter(100)-	3.7213e-06	5.23964e-06	9.07289e-06	1.15422e-05	2.95321e-06	6.30352e-06	798
Otu0799	62	Bacteria(100)-Firmicutes(100)-Clostridia(100)-Clostridiales(100)-Gracilibacteraceae(100)-Lutispora(100)-	6.9746e-06	9.30062e-06	1.70595e-06	4.00667e-06	0	0	799
Otu0800	489	Bacteria(100)-Firmicutes(100)-Bacilli(100)-Bacillales(100)-Thermoactinomycetaceae_1(100)-Desmospora(100)-	0.000113082	0.000154013	8.80975e-05	8.94295e-05	8.76109e-06	2.62833e-05	800
Otu0801	21	Bacteria(100)-Firmicutes(100)-Clostridia(100)-Clostridiales(100)-Ruminococcaceae(100)-Papillibacter(100)-	5.90378e-07	1.86694e-06	2.23462e-06	4.10263e-06	2.73438e-06	5.70784e-06	801
Otu0802	57	Bacteria(100)-Firmicutes(100)-Clostridia(100)-Clostridiales(100)-Ruminococcaceae(100)-Clostridium_IV(100)-	6.12733e-06	9.06069e-06	5.49524e-06	7.88139e-06	1.98501e-05	2.08529e-05	802
Otu0803	343	Bacteria(100)-Bacteroidetes(100)-Bacteroidia(100)-Bacteroidales(100)-Porphyromonadaceae(100)-Barnesiella(100)-	6.03835e-05	3.22059e-05	4.68116e-05	3.22329e-05	1.03095e-05	1.10471e-05	803
Otu0804	255	Bacteria(100)-Firmicutes(100)-Clostridia(100)-Clostridiales(100)-Lachnospiraceae(100)-Robinsoniella(100)-	0.00013262	0.000321939	0	0	9.95863e-05	0.000193849	804
Otu0805	160	Bacteria(100)-Firmicutes(100)-Clostridia(100)-Clostridiales(100)-Lachnospiraceae(100)-Robinsoniella(100)-	5.58008e-05	7.6794e-05	4.85516e-06	1.21902e-05	6.42041e-05	8.12531e-05	805
Otu0806	18	Bacteria(100)-Firmicutes(100)-Clostridia(100)-Clostridiales(100)-Lachnospiraceae(100)-Marvinbryantia(100)-	5.74515e-07	1.81677e-06	1.435e-06	4.53787e-06	2.05107e-06	4.07208e-06	806
Otu0807	1463	Bacteria(100)-Firmicutes(100)-Clostridia(100)-Clostridiales(100)-Lachnospiraceae(100)-Clostridium_XlVa(100)-	9.37963e-06	1.6124e-05	0.000393816	0.00101346	0.000317185	0.000419124	807
Otu0808	14	Bacteria(100)-Firmicutes(100)-Clostridia(100)-Clostridiales(100)-Ruminococcaceae(100)-Acetanaerobacterium(100)-	2.84335e-06	6.56452e-06	1.55742e-06	3.39038e-06	2.98905e-06	8.96716e-06	808
Otu0809	548	Bacteria(100)-Firmicutes(100)-Clostridia(100)-Clostridiales(100)-Lachnospiraceae(100)-Lachnobacterium(100)-	0.000146076	0.000270574	0	0	0.000391833	0.000350352	809
Otu0810	605	Bacteria(100)-Firmicutes(100)-Clostridia(100)-Clostridiales(100)-Lachnospiraceae(100)-Clostridium_XlVa(100)-	0.000139999	0.000183496	3.0436e-05	5.62625e-05	5.82514e-05	4.31684e-05	810
Otu0811	168	Bacteria(100)-Firmicutes(100)-Clostridia(100)-Clostridiales(100)-Lachnospiraceae(100)-Lachnospiracea_incertae_sedis(100)-	2.97768e-06	6.36195e-06	8.62209e-06	2.72655e-05	4.28218e-05	8.07375e-05	811
Otu0812	104	Bacteria(100)-Firmicutes(100)-Clostridia(100)-Clostridiales(100)-Ruminococcaceae(100)-Papillibacter(100)-	1.2271e-05	1.31596e-05	9.9741e-06	1.61809e-05	1.58192e-05	1.55706e-05	812
Otu0813	431	Bacteria(100)-Firmicutes(100)-Clostridia(100)-Clostridiales(100)-Clostridiaceae_1(100)-Anaerosporobacter(100)-	3.69809e-06	9.59352e-06	6.58706e-05	0.000121012	0.000181896	0.000275415	813
Otu0814	3862	Bacteria(100)-Bacteroidetes(100)-Bacteroidia(100)-Bacteroidales(100)-Porphyromonadaceae(100)-Barnesiella(100)-	0.000654966	0.000417639	0.000521595	0.000334189	0.00041389	0.000150752	814
Otu0815	240	Bacteria(100)-Firmicutes(100)-Clostridia(100)-Clostridiales(100)-Peptococcaceae_1(100)-Peptococcus(100)-	2.21868e-05	2.79012e-05	3.53528e-05	5.80494e-05	1.60397e-05	2.09707e-05	815
Otu0816	202	Bacteria(100)-Firmicutes(100)-Clostridia(100)-Clostridiales(100)-Gracilibacteraceae(100)-Lutispora(100)-	2.21511e-05	3.28454e-05	4.1325e-05	3.35621e-05	1.51421e-05	1.47596e-05	816
Otu0817	68	Bacteria(100)-Firmicutes(100)-Clostridia(100)-Clostridiales(100)-Ruminococcaceae(100)-Oscillibacter(100)-	1.71805e-05	1.31702e-05	7.51819e-06	1.1886e-05	5.4959e-06	9.3245e-06	817
Otu0818	182	Bacteria(100)-Firmicutes(100)-Clostridia(100)-Clostridiales(100)-Lachnospiraceae(100)-Clostridium_XlVa(100)-	0.000133212	0.000252514	0	0	5.38001e-05	0.000112668	818
Otu0819	470	Bacteria(100)-Firmicutes(100)-Clostridia(100)-Clostridiales(100)-Lachnospiraceae(100)-Clostridium_XlVa(100)-	2.06097e-05	3.27093e-05	2.94563e-05	4.65515e-05	5.8753e-05	5.96264e-05	819
Otu0820	161	Bacteria(100)-Firmicutes(100)-Clostridia(100)-Clostridiales(100)-Lachnospiraceae(100)-Lachnospira(100)-	5.47221e-05	6.27455e-05	1.11858e-05	1.82556e-05	2.34431e-05	2.12237e-05	820
Otu0821	6593	Bacteria(100)-Firmicutes(100)-Clostridia(100)-Clostridiales(100)-Clostridiales_Incertae_Sedis_XIII(100)-Anaerovorax(100)-	0.000849699	0.000295	0.00114169	0.000655515	0.000616705	0.000323741	821
Otu0822	68	Bacteria(100)-Proteobacteria(100)-Alphaproteobacteria(100)-Rickettsiales(100)-Rickettsiaceae(100)-Orientia(100)-	1.2414e-05	2.77509e-05	2.67148e-05	5.17047e-05	1.82848e-06	5.48543e-06	822
Otu0823	83	Bacteria(100)-Proteobacteria(100)-Alphaproteobacteria(100)-Rickettsiales(100)-Rickettsiaceae(100)-Orientia(100)-	3.69766e-06	8.25961e-06	2.35374e-05	2.75286e-05	1.18063e-05	2.60334e-05	823
Otu0824	19	Bacteria(100)-Firmicutes(100)-Clostridia(100)-Clostridiales(100)-Ruminococcaceae(100)-Clostridium_IV(100)-	4.1569e-06	6.8464e-06	3.05605e-06	9.66407e-06	3.67152e-06	5.89452e-06	824
Otu0825	109	Bacteria(100)-Proteobacteria(100)-Epsilonproteobacteria(100)-Campylobacterales(100)-Helicobacteraceae(100)-Helicobacter(100)-	0	0	0	0	0.00020007	0.000596363	825
Otu0826	558	Bacteria(100)-Firmicutes(100)-Clostridia(100)-Clostridiales(100)-Ruminococcaceae(100)-Papillibacter(100)-	0.00013604	0.000150853	7.88987e-05	4.72238e-05	5.84167e-05	3.4443e-05	826
Otu0827	137	Bacteria(100)-Firmicutes(100)-Clostridia(100)-Clostridiales(100)-Ruminococcaceae(100)-Anaerotruncus(100)-	1.67671e-05	1.29577e-05	1.66552e-05	9.70215e-06	1.77248e-05	1.39618e-05	827
Otu0828	23	Bacteria(100)-Firmicutes(100)-Clostridia(100)-Clostridiales(100)-Lachnospiraceae(100)-Lachnospiracea_incertae_sedis(100)-	1.96983e-06	4.51877e-06	0	0	2.30236e-05	2.89987e-05	828
Otu0829	98	Bacteria(100)-Firmicutes(100)-Clostridia(100)-Clostridiales(100)-Lachnospiraceae(100)-Roseburia(100)-	4.73903e-05	5.43349e-05	0	0	3.7405e-05	4.52688e-05	829
Otu0830	1264	Bacteria(100)-Firmicutes(100)-Clostridia(100)-Clostridiales(100)-Lachnospiraceae(100)-Clostridium_XlVb(100)-	0.00020287	0.000128051	0.000198038	9.82117e-05	0.000145265	9.62551e-05	830
Otu0831	60	Bacteria(100)-Firmicutes(100)-Erysipelotrichia(100)-Erysipelotrichales(100)-Erysipelotrichaceae(100)-Clostridium_XVIII(100)-	1.21399e-06	3.83897e-06	0	0	0	0	831
Otu0832	22	Bacteria(100)-Firmicutes(100)-Clostridia(100)-Clostridiales(100)-Ruminococcaceae(100)-Sporobacter(100)-	1.44592e-05	2.34978e-05	0	0	2.02817e-06	4.02868e-06	832
Otu0833	458	Bacteria(100)-Firmicutes(100)-Clostridia(100)-Clostridiales(100)-Gracilibacteraceae(100)-Gracilibacter(100)-	9.96199e-05	5.15124e-05	5.52994e-05	3.3938e-05	6.0223e-05	2.96306e-05	833
Otu0834	548	Bacteria(100)-Firmicutes(100)-Clostridia(100)-Clostridiales(100)-Lachnospiraceae(100)-Coprococcus(100)-	3.22732e-05	4.62918e-05	0	0	0.000627092	0.000679877	834
Otu0835	61	Bacteria(100)-Actinobacteria(100)-Actinobacteria(100)-Coriobacteriales(100)-Coriobacteriaceae(100)-Asaccharobacter(100)-	4.50529e-06	5.37009e-06	6.31899e-06	8.27603e-06	1.7408e-05	1.75648e-05	835
Otu0836	477	Bacteria(100)-Firmicutes(100)-Clostridia(100)-Clostridiales(100)-Ruminococcaceae(100)-Ethanoligenens(100)-	8.57468e-05	3.65602e-05	6.26286e-05	5.54735e-05	7.29736e-05	4.93012e-05	836
Otu0837	273	Bacteria(100)-Firmicutes(100)-Clostridia(100)-Clostridiales(100)-Ruminococcaceae(100)-Sporobacter(100)-	9.14521e-05	0.000130627	1.83227e-05	4.11102e-05	3.98523e-05	7.64025e-05	837
Otu0838	971	Bacteria(100)-Firmicutes(100)-Clostridia(100)-Clostridiales(100)-Lachnospiraceae(100)-Lachnospiracea_incertae_sedis(100)-	1.64007e-05	4.79625e-05	0.000193345	0.000562468	0.000380947	0.000665214	838
Otu0839	355	Bacteria(100)-Firmicutes(100)-Clostridia(100)-Clostridiales(100)-Ruminococcaceae(100)-Flavonifractor(100)-	0.00011007	0.00010105	2.55047e-05	5.36398e-05	4.34761e-05	3.58792e-05	839
Otu0840	903	Bacteria(100)-Firmicutes(100)-Erysipelotrichia(100)-Erysipelotrichales(100)-Erysipelotrichaceae(100)-Holdemania(100)-	0.000118445	0.000246011	3.02891e-05	4.64356e-05	3.0251e-05	3.96434e-05	840
Otu0841	13	Bacteria(100)-Firmicutes(100)-Clostridia(100)-Clostridiales(100)-Lachnospiraceae(100)-Marvinbryantia(100)-	5.74515e-07	1.81677e-06	3.05952e-06	6.3065e-06	0	0	841
Otu0842	154	Bacteria(100)-Firmicutes(100)-Clostridia(100)-Clostridiales(100)-Lachnospiraceae(100)-Shuttleworthia(100)-	2.98098e-05	3.33314e-05	2.38552e-05	3.61143e-05	1.29304e-05	2.37683e-05	842
Otu0843	780	Bacteria(100)-Firmicutes(100)-Clostridia(100)-Clostridiales(100)-Ruminococcaceae(100)-Clostridium_IV(100)-	0.000209005	0.000141094	9.9214e-05	8.49349e-05	7.36912e-05	5.15389e-05	843
Otu0844	2880	Bacteria(100)-Firmicutes(100)-Clostridia(100)-Clostridiales(100)-Ruminococcaceae(100)-Clostridium_IV(100)-	0.00145955	0.00161515	0.000134004	9.25225e-05	0.00026898	0.000369097	844
Otu0845	121	Bacteria(100)-Firmicutes(100)-Erysipelotrichia(100)-Erysipelotrichales(100)-Erysipelotrichaceae(100)-Coprobacillus(100)-	1.76385e-05	2.29133e-05	2.80549e-05	2.83524e-05	3.05751e-05	1.88863e-05	845
Otu0846	128	Bacteria(100)-Firmicutes(100)-Clostridia(100)-Clostridiales(100)-Clostridiaceae_1(100)-Anaerosporobacter(100)-	1.58139e-05	1.66168e-05	1.069e-05	1.12894e-05	1.59407e-05	1.96732e-05	846
Otu0847	35019	Bacteria(100)-Firmicutes(100)-Clostridia(100)-Clostridiales(100)-Ruminococcaceae(100)-Ruminococcus(100)-	0.0207102	0.0588007	0.000683013	0.00100561	0.000726128	0.000960105	847
Otu0848	635	Bacteria(100)-Firmicutes(100)-Clostridia(100)-Clostridiales(100)-Lachnospiraceae(100)-Clostridium_XlVa(100)-	0	0	7.05955e-05	0.000223242	0.000354263	0.000819434	848
Otu0849	245	Bacteria(100)-Firmicutes(100)-Clostridia(100)-Clostridiales(100)-Ruminococcaceae(100)-Flavonifractor(100)-	4.87944e-05	3.7796e-05	2.91028e-05	2.89995e-05	5.46547e-05	3.01184e-05	849
Otu0850	27	Bacteria(100)-Firmicutes(100)-Clostridia(100)-Clostridiales(100)-Ruminococcaceae(100)-Sporobacter(100)-	1.23763e-06	2.6175e-06	5.09341e-06	1.61068e-05	8.18526e-06	1.16885e-05	850
Otu0851	61	Bacteria(100)-Firmicutes(100)-Clostridia(100)-Clostridiales(100)-Lachnospiraceae(100)-Robinsoniella(100)-	2.81606e-06	3.86484e-06	8.15127e-06	1.47118e-05	1.18674e-05	1.57546e-05	851
Otu0852	402	Bacteria(100)-Firmicutes(100)-Clostridia(100)-Clostridiales(100)-Ruminococcaceae(100)-Acetanaerobacterium(100)-	7.89075e-05	6.1466e-05	5.08251e-05	4.499e-05	3.66184e-05	3.59153e-05	852
Otu0853	19	Bacteria(100)-Firmicutes(100)-Clostridia(100)-Clostridiales(100)-Ruminococcaceae(100)-Flavonifractor(100)-	5.81998e-06	9.74718e-06	1.07775e-06	2.28994e-06	6.40354e-06	7.79369e-06	853
Otu0854	310	Bacteria(100)-Actinobacteria(100)-Actinobacteria(100)-Coriobacteriales(100)-Coriobacteriaceae(100)-Asaccharobacter(100)-	4.46568e-05	2.56132e-05	4.57144e-05	4.77177e-05	4.29946e-05	3.11274e-05	854
Otu0855	75	Bacteria(100)-Proteobacteria(100)-Alphaproteobacteria(100)-Rickettsiales(100)-Rickettsiaceae(100)-Orientia(100)-	6.81417e-07	2.15483e-06	2.21751e-06	4.69416e-06	3.89777e-05	6.66896e-05	855
Otu0856	929	Bacteria(100)-Firmicutes(100)-Clostridia(100)-Clostridiales(100)-Lachnospiraceae(100)-Lachnospiracea_incertae_sedis(100)-	0	0	8.85496e-07	2.80019e-06	0.0008231	0.00167397	856
Otu0857	25	Bacteria(100)-Firmicutes(100)-Clostridia(100)-Clostridiales(100)-Lachnospiraceae(100)-Lachnospiracea_incertae_sedis(100)-	3.05486e-06	5.67635e-06	5.07006e-06	9.88687e-06	2.74272e-06	8.22815e-06	857
Otu0858	50	Bacteria(100)-Firmicutes(100)-Clostridia(100)-Clostridiales(100)-Lachnospiraceae(100)-Lachnospiracea_incertae_sedis(100)-	4.47861e-06	8.60587e-06	7.46525e-06	1.22214e-05	8.20468e-07	2.46141e-06	858
Otu0859	363	Bacteria(100)-Firmicutes(100)-Clostridia(100)-Clostridiales(100)-Gracilibacteraceae(100)-Gracilibacter(100)-	1.54897e-05	3.16036e-05	5.7584e-05	7.09912e-05	2.27179e-05	3.58689e-05	859
Otu0860	40	Bacteria(100)-Firmicutes(100)-Clostridia(100)-Clostridiales(100)-Ruminococcaceae(100)-Ethanoligenens(100)-	2.54004e-06	5.76589e-06	6.41285e-06	1.04213e-05	0	0	860
Otu0861	46	Bacteria(100)-Firmicutes(100)-Clostridia(100)-Clostridiales(100)-Lachnospiraceae(100)-Coprococcus(100)-	1.26675e-05	2.30737e-05	0	0	3.05235e-05	7.07533e-05	861
Otu0862	318	Bacteria(100)-Firmicutes(100)-Clostridia(100)-Clostridiales(100)-Lachnospiraceae(100)-Clostridium_XlVa(100)-	6.0396e-06	1.51718e-05	1.87277e-05	2.8423e-05	1.64369e-05	2.4463e-05	862
Otu0863	106	Bacteria(100)-Firmicutes(100)-Clostridia(100)-Clostridiales(100)-Lachnospiraceae(100)-Clostridium_XlVa(100)-	1.1259e-05	1.8063e-05	4.11476e-06	8.07451e-06	2.12065e-05	1.37655e-05	863
Otu0864	26	Bacteria(100)-Firmicutes(100)-Clostridia(100)-Clostridiales(100)-Ruminococcaceae(100)-Clostridium_IV(100)-	5.49803e-06	1.02458e-05	4.48537e-06	6.74677e-06	3.43486e-06	7.59368e-06	864
Otu0865	19	Bacteria(100)-Firmicutes(100)-Clostridia(100)-Clostridiales(100)-Eubacteriaceae(100)-Eubacterium(100)-	1.81215e-06	3.98832e-06	4.38584e-06	8.19482e-06	8.20468e-07	2.46141e-06	865
Otu0866	164	Bacteria(100)-Firmicutes(100)-Clostridia(100)-Clostridiales(100)-Lachnospiraceae(100)-Robinsoniella(100)-	9.03476e-06	2.62636e-05	7.14074e-06	1.13282e-05	6.19923e-06	1.06412e-05	866
Otu0867	309	Bacteria(100)-Firmicutes(100)-Clostridia(100)-Clostridiales(100)-Lachnospiraceae(100)-Clostridium_XlVa(100)-	2.29806e-06	7.2671e-06	9.52881e-05	0.000217812	5.0963e-05	9.19944e-05	867
Otu0868	492	Bacteria(100)-Firmicutes(100)-Clostridia(100)-Clostridiales(100)-Clostridiales_Incertae_Sedis_XII(100)-Guggenheimella(100)-	6.9369e-05	9.76948e-05	0.000104199	0.000186136	7.09652e-05	8.06665e-05	868
Otu0869	207	Bacteria(100)-Firmicutes(100)-Clostridia(100)-Clostridiales(100)-Clostridiales_Incertae_Sedis_XII(100)-Guggenheimella(100)-	5.84076e-05	4.53659e-05	1.70619e-05	2.39889e-05	4.85113e-05	5.55451e-05	869
Otu0870	7078	Bacteria(100)-Firmicutes(100)-Clostridia(100)-Clostridiales(100)-Lachnospiraceae(100)-Lachnospiracea_incertae_sedis(100)-	0.000590557	0.0011163	0.000962059	0.000907703	0.00028918	0.000288757	870
Otu0871	98	Bacteria(100)-Firmicutes(100)-Clostridia(100)-Clostridiales(100)-Ruminococcaceae(100)-Papillibacter(100)-	1.41051e-05	1.90491e-05	1.99795e-05	1.26421e-05	3.93791e-06	7.83957e-06	871
Otu0872	13	Bacteria(100)-Firmicutes(100)-Clostridia(100)-Clostridiales(100)-Lachnospiraceae(100)-Lachnospiracea_incertae_sedis(100)-	3.43283e-06	4.86921e-06	3.36207e-06	4.55068e-06	0	0	872
Otu0873	8884	Bacteria(100)-Verrucomicrobia(100)-Verrucomicrobiae(100)-Verrucomicrobiales(100)-Verrucomicrobiaceae(100)-Akkermansia(100)-	0.00608603	0.0116974	0.000225779	0.000457157	0.000131157	0.000201755	873
Otu0874	74	Bacteria(100)-Firmicutes(100)-Clostridia(100)-Clostridiales(100)-Ruminococcaceae(100)-Clostridium_III(100)-	3.30323e-05	3.00161e-05	0	0	2.69167e-05	2.92375e-05	874
Otu0875	6742	Bacteria(100)-Bacteroidetes(100)-Bacteroidia(100)-Bacteroidales(100)-Porphyromonadaceae(100)-Barnesiella(100)-	0.000921211	0.00040911	0.00112062	0.000332253	0.000436435	0.000255358	875
Otu0876	183	Bacteria(100)-Proteobacteria(100)-Gammaproteobacteria(100)-Enterobacteriales(100)-Enterobacteriaceae(100)-Enterobacter(100)-	1.99035e-05	4.26236e-05	8.04467e-05	0.000232956	7.31096e-06	1.55979e-05	876
Otu0877	40	Bacteria(100)-Firmicutes(100)-Clostridia(100)-Clostridiales(100)-Ruminococcaceae(100)-Papillibacter(100)-	1.64436e-05	2.80151e-05	0	0	1.79302e-05	5.37905e-05	877
Otu0878	239	Bacteria(100)-Firmicutes(100)-Clostridia(100)-Clostridiales(100)-Ruminococcaceae(100)-Papillibacter(100)-	3.72646e-05	2.33436e-05	1.93681e-05	9.5089e-06	2.9141e-05	2.32281e-05	878
Otu0879	26	Bacteria(100)-Firmicutes(100)-Clostridia(100)-Clostridiales(100)-Lachnospiraceae(100)-Lachnospira(100)-	2.58449e-06	3.36266e-06	5.5125e-06	1.22778e-05	1.14254e-06	3.42763e-06	879
Otu0880	97	Bacteria(100)-Firmicutes(100)-Clostridia(100)-Clostridiales(100)-Lachnospiraceae(100)-Parasporobacterium(100)-	1.15154e-05	2.27354e-05	1.93141e-05	2.96636e-05	2.10381e-05	3.34437e-05	880
Otu0881	170	Bacteria(100)-Firmicutes(100)-Clostridia(100)-Clostridiales(100)-Lachnospiraceae(100)-Parasporobacterium(100)-	4.99189e-05	5.09998e-05	2.39822e-05	3.13186e-05	1.97368e-05	2.91903e-05	881
Otu0882	1298	Bacteria(100)-Firmicutes(100)-Clostridia(100)-Clostridiales(100)-Lachnospiraceae(100)-Johnsonella(100)-	7.31095e-05	0.000137168	6.13674e-05	4.95156e-05	0.00011201	8.70643e-05	882
Otu0883	2549	Bacteria(100)-Firmicutes(100)-Clostridia(100)-Clostridiales(100)-Ruminococcaceae(100)-Ruminococcus(100)-	0.000133655	0.000117663	0.000577069	0.00108031	0.000254252	0.000315167	883
Otu0884	403	Bacteria(100)-Firmicutes(100)-Clostridia(100)-Clostridiales(100)-Lachnospiraceae(100)-Oribacterium(100)-	3.65164e-05	2.79551e-05	5.72007e-05	7.07482e-05	2.8585e-05	1.98593e-05	884
Otu0885	139	Bacteria(100)-Firmicutes(100)-Clostridia(100)-Clostridiales(100)-Ruminococcaceae(100)-Oscillibacter(100)-	2.57015e-05	4.91568e-05	0	0	2.29789e-05	5.22039e-05	885
Otu0886	2479	Bacteria(100)-Bacteroidetes(100)-Bacteroidia(100)-Bacteroidales(100)-Bacteroidaceae(100)-Bacteroides(100)-	0.000521588	0.000560698	0.000174291	0.000127393	0.00103232	0.00112657	886
Otu0887	85	Bacteria(100)-Firmicutes(100)-Clostridia(100)-Clostridiales(100)-Lachnospiraceae(100)-Lachnospiracea_incertae_sedis(100)-	5.83375e-06	1.62521e-05	2.44484e-05	7.73126e-05	5.02635e-05	0.000102923	887
Otu0888	4240	Bacteria(100)-Firmicutes(100)-Negativicutes(100)-Selenomonadales(100)-Acidaminococcaceae(100)-Phascolarctobacterium(100)-	0.000591442	0.000894354	0.000771578	0.00099212	0.000937107	0.000964169	888
Otu0889	218	Bacteria(100)-Firmicutes(100)-Clostridia(100)-Clostridiales(100)-Ruminococcaceae(100)-Flavonifractor(100)-	6.07075e-05	0.000119065	7.72476e-06	2.10929e-05	7.14004e-05	6.06533e-05	889
Otu0890	35	Bacteria(100)-Verrucomicrobia(100)-Opitutae(100)-Puniceicoccales(100)-Puniceicoccaceae(100)-Cerasicoccus(100)-	7.19397e-06	9.63912e-06	1.84326e-06	5.8289e-06	4.14422e-06	8.27909e-06	890
Otu0891	20	Bacteria(100)-Firmicutes(100)-Clostridia(100)-Clostridiales(100)-Clostridiales_Incertae_Sedis_XII(100)-Guggenheimella(100)-	2.13088e-06	3.48022e-06	0	0	1.48731e-05	4.46192e-05	891
Otu0892	516	Bacteria(100)-Firmicutes(100)-Clostridia(100)-Clostridiales(100)-Clostridiales_Incertae_Sedis_XIII(100)-Anaerovorax(100)-	0.000189025	0.000205366	0	0	0.000248343	0.0002708	892
Otu0893	27	Bacteria(100)-Firmicutes(100)-Clostridia(100)-Clostridiales(100)-Clostridiaceae_1(100)-Oxobacter(100)-	6.31966e-06	1.99845e-05	0	0	0	0	893
Otu0894	2587	Bacteria(100)-Firmicutes(100)-Clostridia(100)-Clostridiales(100)-Ruminococcaceae(100)-Sporobacter(100)-	0.000325426	0.000161103	0.000410972	0.000347684	0.00037901	0.000247689	894
Otu0895	9186	Bacteria(100)-Firmicutes(100)-Clostridia(100)-Clostridiales(100)-Lachnospiraceae(100)-Hespellia(100)-	9.42828e-05	0.000152804	0.000392306	0.000451082	0.000561096	0.000632648	895
Otu0896	7426	Bacteria(100)-Firmicutes(100)-Clostridia(100)-Clostridiales(100)-Clostridiales_Incertae_Sedis_XII(100)-Guggenheimella(100)-	0.000426702	0.000765927	0.00179877	0.00292187	0.000613458	0.00105425	896
Otu0897	2792	Bacteria(100)-Bacteroidetes(100)-Bacteroidia(100)-Bacteroidales(100)-Porphyromonadaceae(100)-Barnesiella(100)-	0.000587259	0.000407755	0.000347999	0.000371462	0.000348772	0.000249173	897
Otu0898	13	Bacteria(100)-Firmicutes(100)-Clostridia(100)-Clostridiales(100)-Gracilibacteraceae(100)-Gracilibacter(100)-	2.87257e-06	9.08387e-06	0	0	7.77052e-06	1.70177e-05	898
Otu0899	66	Bacteria(100)-Firmicutes(100)-Clostridia(100)-Clostridiales(100)-Lachnospiraceae(100)-Lachnospiracea_incertae_sedis(100)-	5.38267e-06	7.49663e-06	1.17129e-05	1.71533e-05	7.36352e-06	7.58891e-06	899
Otu0900	567	Bacteria(100)-Firmicutes(100)-Erysipelotrichia(100)-Erysipelotrichales(100)-Erysipelotrichaceae(100)-Holdemania(100)-	0.000135561	0.000175153	7.67668e-05	5.42347e-05	4.3684e-05	7.40362e-05	900
Otu0901	16	Bacteria(100)-Firmicutes(100)-Clostridia(100)-Clostridiales(100)-Clostridiaceae_1(100)-Oxobacter(100)-	4.17101e-06	4.7912e-06	1.84265e-06	4.14631e-06	3.16415e-06	9.49244e-06	901
Otu0902	485	Bacteria(100)-Firmicutes(100)-Clostridia(100)-Clostridiales(100)-Gracilibacteraceae(100)-Gracilibacter(100)-	0.000115362	8.73911e-05	8.19999e-05	4.64459e-05	6.18624e-05	7.18421e-05	902
Otu0903	28	Bacteria(100)-Firmicutes(100)-Clostridia(100)-Clostridiales(100)-Ruminococcaceae(100)-Clostridium_III(100)-	1.65306e-05	5.22743e-05	0	0	0	0	903
Otu0904	12	Bacteria(100)-Firmicutes(100)-Clostridia(100)-Clostridiales(100)-Lachnospiraceae(100)-Clostridium_XlVb(100)-	1.04417e-06	3.30195e-06	9.89895e-07	2.08835e-06	1.91059e-06	3.79571e-06	904
Otu0905	2121	Bacteria(100)-Firmicutes(100)-Clostridia(100)-Clostridiales(100)-Ruminococcaceae(100)-Ruminococcus(100)-	0.00109736	0.00265289	5.11561e-07	1.6177e-06	0.000933778	0.00136884	905
Otu0906	43	Bacteria(100)-Bacteroidetes(100)-Sphingobacteria(100)-Sphingobacteriales(100)-Cytophagaceae(100)-Rudanella(100)-	8.19075e-06	1.58859e-05	1.09275e-06	2.32595e-06	1.61304e-05	2.21083e-05	906
Otu0907	233	Bacteria(100)-Firmicutes(100)-Clostridia(100)-Clostridiales(100)-Ruminococcaceae(100)-Flavonifractor(100)-	5.97447e-05	4.7198e-05	1.63249e-06	3.57145e-06	6.50104e-05	5.79691e-05	907
Otu0908	1527	Bacteria(100)-Firmicutes(100)-Clostridia(100)-Clostridiales(100)-Clostridiaceae_1(100)-Anaerosporobacter(100)-	0.000178907	0.000170344	0.000331174	0.000510367	8.58398e-05	0.000110495	908
Otu0909	104	Bacteria(100)-Actinobacteria(100)-Actinobacteria(100)-Coriobacteriales(100)-Coriobacteriaceae(100)-Paraeggerthella(100)-	1.32623e-06	4.19392e-06	3.37242e-05	6.13996e-05	5.94226e-06	1.48626e-05	909
Otu0910	25	Bacteria(100)-Firmicutes(100)-Clostridia(100)-Clostridiales(100)-Ruminococcaceae(100)-Acetivibrio(100)-	6.24434e-06	8.0127e-06	2.33686e-06	5.85965e-06	2.78942e-06	4.21764e-06	910
Otu0911	21	Bacteria(100)-Bacteroidetes(100)-Bacteroidia(100)-Bacteroidales(100)-Bacteroidaceae(100)-Bacteroides(100)-	0	0	6.69667e-06	2.11767e-05	0	0	911
Otu0912	2527	Bacteria(100)-Firmicutes(100)-Clostridia(100)-Clostridiales(100)-Lachnospiraceae(100)-Lachnospiracea_incertae_sedis(100)-	0.000214022	0.000527525	0.000395622	0.000534149	0.000506917	0.000757179	912
Otu0913	5481	Bacteria(100)-Bacteroidetes(100)-Bacteroidia(100)-Bacteroidales(100)-Porphyromonadaceae(100)-Butyricimonas(100)-	0.000570758	0.000297348	0.000876825	0.000482756	0.000928643	0.000421889	913
Otu0914	21	Bacteria(100)-Firmicutes(100)-Clostridia(100)-Clostridiales(100)-Lachnospiraceae(100)-Lactonifactor(100)-	0	0	9.46112e-06	7.4482e-06	0	0	914
Otu0915	165	Bacteria(100)-Firmicutes(100)-Clostridia(100)-Clostridiales(100)-Clostridiales_Incertae_Sedis_XIII(100)-Anaerovorax(100)-	1.13066e-05	2.41746e-05	3.43117e-05	6.99572e-05	1.12047e-05	2.13867e-05	915
Otu0916	60	Bacteria(100)-Firmicutes(100)-Clostridia(100)-Clostridiales(100)-Ruminococcaceae(100)-Clostridium_IV(100)-	8.65019e-06	7.13927e-06	1.90862e-06	4.03678e-06	1.62386e-05	1.49675e-05	916
Otu0917	309	Bacteria(100)-Actinobacteria(100)-Actinobacteria(100)-Coriobacteriales(100)-Coriobacteriaceae(100)-Adlercreutzia(100)-	2.96857e-05	1.64903e-05	4.72346e-05	2.32077e-05	2.62552e-05	2.20454e-05	917
Otu0918	3172	Bacteria(100)-Firmicutes(100)-Clostridia(100)-Clostridiales(100)-Lachnospiraceae(100)-Robinsoniella(100)-	0.000496896	0.000797874	9.92474e-05	9.78867e-05	0.000398472	0.000692651	918
Otu0919	12	Bacteria(100)-Firmicutes(100)-Clostridia(100)-Clostridiales(100)-Lachnospiraceae(100)-Shuttleworthia(100)-	3.0911e-06	7.73112e-06	0	0	6.20224e-06	1.2334e-05	919
Otu0920	3230	Bacteria(100)-Firmicutes(100)-Clostridia(100)-Clostridiales(100)-Lachnospiraceae(100)-Lachnospiracea_incertae_sedis(100)-	0.000283762	0.000438386	0.000210383	0.000445899	0.00198294	0.0036282	920
Otu0921	6827	Bacteria(100)-Bacteroidetes(100)-Bacteroidia(100)-Bacteroidales(100)-Rikenellaceae(100)-Alistipes(100)-	0.00188081	0.00107018	0.00115184	0.00161981	0.000995917	0.000581326	921
Otu0922	5513	Bacteria(100)-Firmicutes(100)-Clostridia(100)-Clostridiales(100)-Ruminococcaceae(100)-Sporobacter(100)-	0.00103972	0.000994285	0.00115656	0.000373253	0.000490266	0.000289993	922
Otu0923	33	Bacteria(100)-Firmicutes(100)-Clostridia(100)-Clostridiales(100)-Ruminococcaceae(100)-Clostridium_IV(100)-	4.56431e-06	6.39813e-06	8.02549e-06	8.54824e-06	2.96616e-06	6.31678e-06	923
Otu0924	56	Bacteria(100)-Firmicutes(100)-Clostridia(100)-Clostridiales(100)-Lachnospiraceae(100)-Lachnospiracea_incertae_sedis(100)-	0	0	2.87403e-06	9.08848e-06	7.38422e-06	2.21526e-05	924
Otu0925	1612	Bacteria(100)-Firmicutes(100)-Clostridia(100)-Clostridiales(100)-Ruminococcaceae(100)-Flavonifractor(100)-	4.93132e-05	6.42827e-05	0.000229319	0.000359234	4.60648e-05	5.08156e-05	925
Otu0926	58	Bacteria(100)-Firmicutes(100)-Clostridia(100)-Clostridiales(100)-Clostridiales_Incertae_Sedis_XII(100)-Guggenheimella(100)-	3.80904e-06	1.20452e-05	9.79025e-06	2.22817e-05	4.16621e-06	6.87068e-06	926
Otu0927	5968	Bacteria(100)-Bacteroidetes(100)-Bacteroidia(100)-Bacteroidales(100)-Porphyromonadaceae(100)-Barnesiella(100)-	0.000566683	0.000449554	0.000615823	0.000744373	0.000806454	0.000654758	927
Otu0928	216	Bacteria(100)-Proteobacteria(100)-Alphaproteobacteria(100)-Rhodospirillales(100)-Rhodospirillaceae(100)-Insolitispirillum(100)-	4.93945e-05	8.25528e-05	0	0	6.84074e-05	0.000135322	928
Otu0929	31	Bacteria(100)-Firmicutes(100)-Clostridia(100)-Clostridiales(100)-Ruminococcaceae(100)-Oscillibacter(100)-	1.83739e-05	2.02405e-05	0	0	1.00852e-05	8.62378e-06	929
Otu0930	15	Bacteria(100)-Firmicutes(100)-Clostridia(100)-Clostridiales(100)-Lachnospiraceae(100)-Lachnospiracea_incertae_sedis(100)-	0	0	0	0	0	0	930
Otu0931	45	Bacteria(100)-Firmicutes(100)-Clostridia(100)-Clostridiales(100)-Lachnospiraceae(100)-Robinsoniella(100)-	0	0	1.23861e-05	3.91683e-05	0	0	931
Otu0932	10	Bacteria(100)-Firmicutes(100)-Clostridia(100)-Clostridiales(100)-Ruminococcaceae(100)-Clostridium_IV(100)-	3.32349e-06	5.49262e-06	1.1938e-06	3.77513e-06	0	0	932
Otu0933	60	Bacteria(100)-Firmicutes(100)-Clostridia(100)-Clostridiales(100)-Ruminococcaceae(100)-Clostridium_IV(100)-	9.38258e-06	1.20426e-05	5.61877e-06	1.23919e-05	9.06762e-06	1.38341e-05	933
Otu0934	155	Bacteria(100)-Firmicutes(100)-Clostridia(100)-Clostridiales(100)-Ruminococcaceae(100)-Clostridium_IV(100)-	7.70993e-05	9.43966e-05	6.1442e-07	1.94297e-06	4.80576e-05	7.5588e-05	934
Otu0935	20	Bacteria(100)-Firmicutes(100)-Clostridia(100)-Clostridiales(100)-Lachnospiraceae(100)-Marvinbryantia(100)-	3.77584e-06	6.5577e-06	2.45768e-06	7.77187e-06	2.77337e-06	5.89963e-06	935
Otu0936	184	Bacteria(100)-Actinobacteria(100)-Actinobacteria(100)-Bifidobacteriales(100)-Bifidobacteriaceae(100)-Bifidobacterium(100)-	1.62242e-05	2.96732e-05	2.13069e-05	3.87821e-05	0.000103805	0.000225306	936
Otu0937	71	Bacteria(100)-Firmicutes(100)-Clostridia(100)-Clostridiales(100)-Ruminococcaceae(100)-Clostridium_III(100)-	7.94169e-06	1.67599e-05	2.523e-05	1.16902e-05	1.05472e-06	3.16415e-06	937
Otu0938	930	Bacteria(100)-Firmicutes(100)-Clostridia(100)-Clostridiales(100)-Lachnospiraceae(100)-Lachnospiracea_incertae_sedis(100)-	4.04103e-05	6.15657e-05	0.000242247	0.000449508	5.91588e-05	6.30503e-05	938
Otu0939	33	Bacteria(100)-Firmicutes(100)-Clostridia(100)-Clostridiales(100)-Clostridiaceae_1(100)-Oxobacter(100)-	1.2678e-05	1.71373e-05	1.51413e-06	3.42202e-06	5.95521e-06	1.48653e-05	939
Otu0940	110	Bacteria(100)-Firmicutes(100)-Clostridia(100)-Clostridiales(100)-Ruminococcaceae(100)-Sporobacter(100)-	2.18661e-05	1.78014e-05	1.57027e-05	1.16382e-05	1.73277e-05	1.48344e-05	940
Otu0941	2336	Bacteria(100)-Firmicutes(100)-Clostridia(100)-Clostridiales(100)-Ruminococcaceae(100)-Clostridium_IV(100)-	0.000361897	0.000202613	0.000400249	0.000152125	0.0002339	0.000173584	941
Otu0942	47	Bacteria(100)-Firmicutes(100)-Bacilli(100)-Lactobacillales(100)-Lactobacillaceae(100)-Paralactobacillus(100)-	2.31596e-06	3.897e-06	1.04104e-05	1.24003e-05	6.56601e-06	1.05607e-05	942
Otu0943	314	Bacteria(100)-Firmicutes(100)-Clostridia(100)-Clostridiales(100)-Ruminococcaceae(100)-Clostridium_IV(100)-	3.55448e-05	3.49147e-05	2.0882e-05	3.15885e-05	6.23484e-05	5.19104e-05	943
Otu0944	13	Bacteria(100)-Firmicutes(100)-Clostridia(100)-Clostridiales(100)-Ruminococcaceae(100)-Anaerotruncus(100)-	0	0	0	0	2.88405e-06	4.33027e-06	944
Otu0945	105	Bacteria(100)-Proteobacteria(100)-Deltaproteobacteria(100)-Desulfovibrionales(100)-Desulfovibrionaceae(100)-Desulfovibrio(100)-	1.79283e-05	2.04229e-05	8.51354e-06	9.57732e-06	6.11097e-06	7.74839e-06	945
Otu0946	133	Bacteria(100)-Actinobacteria(100)-Actinobacteria(100)-Coriobacteriales(100)-Coriobacteriaceae(100)-Eggerthella(100)-	6.1408e-06	1.14382e-05	2.44551e-05	5.15941e-05	0	0	946
Otu0947	4493	Bacteria(100)-Firmicutes(100)-Clostridia(100)-Clostridiales(100)-Clostridiales_Incertae_Sedis_XII(100)-Guggenheimella(100)-	0.000142518	0.00044157	0.00300865	0.00951201	1.14254e-06	3.42763e-06	947
Otu0948	51	Bacteria(100)-Firmicutes(100)-Erysipelotrichia(100)-Erysipelotrichales(100)-Erysipelotrichaceae(100)-Erysipelotrichaceae_incertae_sedis(100)-	1.97164e-05	3.75387e-05	0	0	2.8542e-05	5.54163e-05	948
Otu0949	55	Bacteria(100)-Firmicutes(100)-Clostridia(100)-Clostridiales(100)-Incertae_Sedis_IV(100)-Caldicoprobacter(100)-	3.02401e-06	7.75718e-06	1.15898e-05	2.52319e-05	1.26546e-05	1.42937e-05	949
Otu0950	10	Bacteria(100)-Firmicutes(100)-Clostridia(100)-Clostridiales(100)-Ruminococcaceae(100)-Clostridium_IV(100)-	0	0	1.91602e-06	6.05899e-06	1.64094e-06	4.92281e-06	950
Otu0951	78	Bacteria(100)-Firmicutes(100)-Clostridia(100)-Clostridiales(100)-Gracilibacteraceae(100)-Gracilibacter(100)-	2.74319e-05	4.00932e-05	1.42465e-05	3.33075e-05	1.43567e-05	3.14917e-05	951
Otu0952	1413	Bacteria(100)-Firmicutes(100)-Clostridia(100)-Clostridiales(100)-Lachnospiraceae(100)-Robinsoniella(100)-	8.69493e-05	0.000154426	0.000331914	0.000632618	9.45959e-05	0.000206009	952
Otu0953	242	Bacteria(100)-Proteobacteria(100)-Alphaproteobacteria(100)-Rickettsiales(100)-Rickettsiaceae(100)-Orientia(100)-	7.04442e-05	5.06735e-05	1.08815e-05	1.96946e-05	5.86167e-05	7.67662e-05	953
Otu0954	318	Bacteria(100)-Proteobacteria(100)-Betaproteobacteria(100)-Burkholderiales(100)-Sutterellaceae(100)-Sutterella(100)-	0	0	0	0	0.000360693	0.000416361	954
Otu0955	2506	Bacteria(100)-Firmicutes(100)-Clostridia(100)-Clostridiales(100)-Lachnospiraceae(100)-Lachnospiracea_incertae_sedis(100)-	0.000235198	0.000279322	0.000601262	0.00111642	0.000174755	0.000153931	955
Otu0956	82	Bacteria(100)-Firmicutes(100)-Clostridia(100)-Clostridiales(100)-Clostridiales_Incertae_Sedis_XIII(100)-Anaerovorax(100)-	1.49062e-05	3.18891e-05	2.44267e-06	5.92569e-06	3.14903e-05	5.83412e-05	956
Otu0957	985	Bacteria(100)-Firmicutes(100)-Clostridia(100)-Clostridiales(100)-Lachnospiraceae(100)-Clostridium_XlVa(100)-	0.000112018	0.000241384	6.25857e-05	0.000104608	0.000143376	0.000192822	957
Otu0958	187	Bacteria(100)-Firmicutes(100)-Clostridia(100)-Clostridiales(100)-Ruminococcaceae(100)-Acetivibrio(100)-	2.02859e-05	1.79397e-05	2.2646e-05	2.2534e-05	1.13126e-05	1.36632e-05	958
Otu0959	73	Bacteria(100)-Actinobacteria(100)-Actinobacteria(100)-Coriobacteriales(100)-Coriobacteriaceae(100)-Adlercreutzia(100)-	1.3025e-05	1.24046e-05	1.65038e-05	1.03974e-05	4.25489e-06	7.22133e-06	959
Otu0960	579	Bacteria(100)-Firmicutes(100)-Clostridia(100)-Clostridiales(100)-Ruminococcaceae(100)-Sporobacter(100)-	2.11344e-05	3.46776e-05	9.8185e-05	0.000177973	0.000101155	9.7926e-05	960
Otu0961	17	Bacteria(100)-Firmicutes(100)-Clostridia(100)-Clostridiales(100)-Clostridiaceae_2(100)-Anoxynatronum(100)-	0	0	4.09249e-06	1.29416e-05	0	0	961
Otu0962	456	Bacteria(100)-Firmicutes(100)-Clostridia(100)-Clostridiales(100)-Ruminococcaceae(100)-Clostridium_IV(100)-	4.01719e-05	1.77592e-05	3.49146e-05	3.25137e-05	0.00010459	4.43064e-05	962
Otu0963	111	Bacteria(100)-Firmicutes(100)-Clostridia(100)-Clostridiales(100)-Clostridiaceae_4(100)-Thermotalea(100)-	2.52317e-06	4.42683e-06	9.45344e-06	1.49714e-05	2.38437e-05	2.47557e-05	963
Otu0964	274	Bacteria(100)-Firmicutes(100)-Clostridia(100)-Clostridiales(100)-Lachnospiraceae(100)-Butyrivibrio(100)-	2.5311e-05	1.95546e-05	4.29217e-05	3.80599e-05	4.03927e-05	3.82856e-05	964
Otu0965	9356	Bacteria(100)-Proteobacteria(100)-Deltaproteobacteria(100)-Bdellovibrionales(100)-Bdellovibrionaceae(100)-Vampirovibrio(100)-	0.00142735	0.00141753	0.00170124	0.0017334	0.00175079	0.000839899	965
Otu0966	41	Bacteria(100)-Firmicutes(100)-Clostridia(100)-Clostridiales(100)-Ruminococcaceae(100)-Acetivibrio(100)-	1.4434e-05	2.56686e-05	3.89125e-06	4.56547e-06	0	0	966
Otu0967	43	Bacteria(100)-Firmicutes(100)-Clostridia(100)-Clostridiales(100)-Ruminococcaceae(100)-Papillibacter(100)-	8.10368e-06	6.86197e-06	3.44747e-06	4.55849e-06	9.90597e-06	1.02742e-05	967
Otu0968	11	Bacteria(100)-Firmicutes(100)-Clostridia(100)-Clostridiales(100)-Lachnospiraceae(100)-Lachnospira(100)-	1.19737e-06	2.52459e-06	9.5801e-07	3.02949e-06	3.10555e-06	6.98818e-06	968
Otu0969	315	Bacteria(100)-Firmicutes(100)-Erysipelotrichia(100)-Erysipelotrichales(100)-Erysipelotrichaceae(100)-Bulleidia(100)-	5.24015e-05	4.67058e-05	5.5688e-05	7.70869e-05	4.46009e-05	9.07565e-05	969
Otu0970	966	Bacteria(100)-Firmicutes(100)-Clostridia(100)-Clostridiales(100)-Eubacteriaceae(100)-Eubacterium(100)-	0.000160359	5.63646e-05	0.000112015	5.8995e-05	0.000171979	0.000105846	970
Otu0971	355	Bacteria(100)-Firmicutes(100)-Clostridia(100)-Clostridiales(100)-Peptococcaceae_2(100)-Desulfurispora(100)-	8.37373e-05	0.000101543	4.50302e-05	8.56934e-05	5.38937e-05	9.1897e-05	971
Otu0972	14	Bacteria(100)-Firmicutes(100)-Clostridia(100)-Clostridiales(100)-Gracilibacteraceae(100)-Gracilibacter(100)-	2.05424e-06	4.82778e-06	4.55449e-06	1.14397e-05	9.60504e-07	2.88151e-06	972
Otu0973	459	Bacteria(100)-Firmicutes(100)-Clostridia(100)-Clostridiales(100)-Lachnospiraceae(100)-Acetitomaculum(100)-	0.000197373	0.000105407	0	0	0.000221077	0.000139743	973
Otu0974	1182	Bacteria(100)-Firmicutes(100)-Clostridia(100)-Clostridiales(100)-Lachnospiraceae(100)-Lachnobacterium(100)-	0.000121423	9.48532e-05	0.000309538	0.000362937	0.00015506	0.00013637	974
Otu0975	45	Bacteria(100)-Firmicutes(100)-Clostridia(100)-Clostridiales(100)-Ruminococcaceae(100)-Anaerotruncus(100)-	6.99004e-06	8.89332e-06	4.26475e-06	7.34636e-06	4.75329e-06	5.89139e-06	975
Otu0976	169	Bacteria(100)-Firmicutes(100)-Clostridia(100)-Clostridiales(100)-Ruminococcaceae(100)-Faecalibacterium(100)-	1.32746e-05	1.72585e-05	1.11358e-05	2.16701e-05	4.66894e-05	5.40674e-05	976
Otu0977	22	Bacteria(100)-Proteobacteria(100)-Alphaproteobacteria(100)-Rickettsiales(100)-Rickettsiaceae(100)-Orientia(100)-	3.6033e-06	4.88697e-06	3.96356e-06	1.25339e-05	1.82848e-06	5.48543e-06	977
Otu0978	678	Bacteria(100)-Firmicutes(100)-Erysipelotrichia(100)-Erysipelotrichales(100)-Erysipelotrichaceae(100)-Holdemania(100)-	5.68891e-05	6.39933e-05	0.000137166	7.73776e-05	6.25966e-05	6.59346e-05	978
Otu0979	73	Bacteria(100)-Firmicutes(100)-Clostridia(100)-Clostridiales(100)-Ruminococcaceae(100)-Butyricicoccus(100)-	7.30352e-06	1.41211e-05	0	0	7.34446e-05	6.2569e-05	979
Otu0980	296	Bacteria(100)-Firmicutes(100)-Clostridia(100)-Clostridiales(100)-Lachnospiraceae(100)-Blautia(100)-	5.12667e-06	1.29653e-05	6.38933e-06	1.36105e-05	1.12776e-05	1.89469e-05	980
Otu0981	49	Bacteria(100)-Firmicutes(100)-Clostridia(100)-Clostridiales(100)-Lachnospiraceae(100)-Lachnospiracea_incertae_sedis(100)-	7.78577e-06	1.03798e-05	6.83653e-06	7.77265e-06	1.14254e-06	3.42763e-06	981
Otu0982	712	Bacteria(100)-Firmicutes(100)-Clostridia(100)-Clostridiales(100)-Lachnospiraceae(100)-Lachnospiracea_incertae_sedis(100)-	5.92698e-05	0.000125685	1.45578e-05	2.67024e-05	3.62894e-05	7.73006e-05	982
Otu0983	13087	Bacteria(100)-Proteobacteria(100)-Deltaproteobacteria(100)-Bdellovibrionales(100)-Bdellovibrionaceae(100)-Vampirovibrio(100)-	0.00444085	0.00535519	0.00268418	0.00314855	0.000441292	0.00125774	983
Otu0984	20	Bacteria(100)-Actinobacteria(100)-Actinobacteria(100)-Actinomycetales(100)-Corynebacteriaceae(100)-Corynebacterium(100)-	2.45105e-06	4.08893e-06	4.15534e-06	6.72946e-06	4.72376e-06	8.9798e-06	984
Otu0985	31	Bacteria(100)-Firmicutes(100)-Clostridia(100)-Clostridiales(100)-Clostridiales_Incertae_Sedis_XII(100)-Fusibacter(100)-	4.68949e-06	1.28392e-05	1.69155e-06	2.74615e-06	2.10943e-06	6.32829e-06	985
Otu0986	292	Bacteria(100)-Firmicutes(100)-Clostridia(100)-Clostridiales(100)-Ruminococcaceae(100)-Flavonifractor(100)-	4.19361e-05	3.24334e-05	4.39365e-05	4.9723e-05	5.34853e-05	9.02373e-05	986
Otu0987	15122	Bacteria(100)-Proteobacteria(100)-Betaproteobacteria(100)-Burkholderiales(100)-Sutterellaceae(100)-Parasutterella(100)-	0.00183336	0.000948157	0.00266248	0.00247225	0.00261427	0.00117438	987
Otu0988	50	Bacteria(100)-Firmicutes(100)-Clostridia(100)-Clostridiales(100)-Ruminococcaceae(100)-Ethanoligenens(100)-	3.91551e-06	6.97686e-06	5.56171e-06	1.28521e-05	1.23175e-05	1.84385e-05	988
Otu0989	246	Bacteria(100)-Actinobacteria(100)-Actinobacteria(100)-Coriobacteriales(100)-Coriobacteriaceae(100)-Paraeggerthella(100)-	4.0975e-05	3.85681e-05	1.59689e-05	1.82216e-05	3.34158e-05	3.42043e-05	989
Otu0990	100	Bacteria(100)-Firmicutes(100)-Clostridia(100)-Clostridiales(100)-Lachnospiraceae(100)-Roseburia(100)-	2.47041e-05	7.81213e-05	2.28656e-06	4.09423e-06	5.0921e-06	9.1569e-06	990
Otu0991	140	Bacteria(100)-Firmicutes(100)-Clostridia(100)-Clostridiales(100)-Lachnospiraceae(100)-Clostridium_XlVb(100)-	2.81856e-05	1.75368e-05	2.32028e-05	3.16028e-05	1.9823e-05	1.68228e-05	991
Otu0992	16	Bacteria(100)-Firmicutes(100)-Clostridia(100)-Clostridiales(100)-Lachnospiraceae(100)-Blautia(100)-	0	0	0	0	2.35568e-05	4.6099e-05	992
Otu0993	1125	Bacteria(100)-Firmicutes(100)-Clostridia(100)-Clostridiales(100)-Lachnospiraceae(100)-Lachnospiracea_incertae_sedis(100)-	0.00024117	0.00069626	7.454e-05	9.93263e-05	0.000119527	0.000132794	993
Otu0994	51	Bacteria(100)-Firmicutes(100)-Bacilli(100)-Lactobacillales(100)-Aerococcaceae(100)-Globicatella(100)-	1.2718e-06	2.68975e-06	6.66242e-06	8.6317e-06	1.2557e-05	1.82908e-05	994
Otu0995	75	Bacteria(100)-Firmicutes(100)-Clostridia(100)-Clostridiales(100)-Lachnospiraceae(100)-Marvinbryantia(100)-	3.93626e-06	5.4032e-06	2.32184e-06	3.9322e-06	1.73471e-06	3.44866e-06	995
Otu0996	52	Bacteria(100)-Firmicutes(100)-Clostridia(100)-Clostridiales(100)-Ruminococcaceae(100)-Ruminococcus(100)-	2.4397e-05	2.79919e-05	4.78334e-07	1.51262e-06	6.04219e-06	1.18924e-05	996
Otu0997	624	Bacteria(100)-Firmicutes(100)-Erysipelotrichia(100)-Erysipelotrichales(100)-Erysipelotrichaceae(100)-Bulleidia(100)-	0.000107864	0.00027258	4.77663e-05	7.82918e-05	0.000138752	0.000272887	997
Otu0998	24	Bacteria(100)-Firmicutes(100)-Clostridia(100)-Clostridiales(100)-Clostridiaceae_4(100)-Thermotalea(100)-	1.81215e-06	3.98832e-06	3.70285e-06	5.1027e-06	4.57119e-06	1.37136e-05	998
Otu0999	31	Bacteria(100)-Firmicutes(100)-Clostridia(100)-Clostridiales(100)-Incertae_Sedis_XI(100)-Dethiosulfatibacter(100)-	0	0	0	0	0	0	999
Otu1000	68	Bacteria(100)-Firmicutes(100)-Clostridia(100)-Clostridiales(100)-Clostridiales_Incertae_Sedis_XI(100)-Soehngenia(100)-	3.99451e-06	8.59445e-06	2.79412e-06	6.14861e-06	2.21097e-05	2.63725e-05	1000
Otu1001	13	Bacteria(100)-Proteobacteria(100)-Alphaproteobacteria(100)-Rickettsiales(100)-Rickettsiaceae(100)-Orientia(100)-	5.21277e-06	1.11686e-05	0	0	4.40108e-06	1.03324e-05	1001
Otu1002	864	Bacteria(100)-Firmicutes(100)-Negativicutes(100)-Selenomonadales(100)-Veillonellaceae(100)-Dendrosporobacter(100)-	0.00013473	4.8147e-05	0.000146536	7.73973e-05	0.000109086	7.90025e-05	1002
Otu1003	170	Bacteria(100)-Firmicutes(100)-Clostridia(100)-Clostridiales(100)-Lachnospiraceae(100)-Acetitomaculum(100)-	3.11705e-05	2.74387e-05	8.13883e-06	1.00336e-05	3.46441e-05	3.94042e-05	1003
Otu1004	7809	Bacteria(100)-Elusimicrobia(100)-Elusimicrobia(100)-Elusimicrobiales(100)-Elusimicrobiaceae(100)-Elusimicrobium(100)-	0.00148518	0.0012758	0.000518096	0.000417418	0.00156874	0.000980286	1004
Otu1005	124	Bacteria(100)-Firmicutes(100)-Clostridia(100)-Clostridiales(100)-Ruminococcaceae(100)-Acetanaerobacterium(100)-	2.07978e-05	2.03208e-05	1.28464e-05	1.0645e-05	1.8711e-05	2.38629e-05	1005
Otu1006	58	Bacteria(100)-Firmicutes(100)-Clostridia(100)-Clostridiales(100)-Clostridiaceae_1(100)-Oxobacter(100)-	5.74515e-07	1.81677e-06	1.40722e-05	1.32453e-05	1.70825e-05	2.30623e-05	1006
Otu1007	27	Bacteria(100)-Firmicutes(100)-Clostridia(100)-Clostridiales(100)-Lachnospiraceae(100)-Blautia(100)-	5.24881e-06	1.45907e-05	3.2559e-06	8.4038e-06	0	0	1007
Otu1008	314	Bacteria(100)-Firmicutes(100)-Clostridia(100)-Clostridiales(100)-Clostridiales_Incertae_Sedis_XII(100)-Guggenheimella(100)-	0.000134247	9.02959e-05	6.13806e-07	1.94102e-06	0.000119488	9.5345e-05	1008
Otu1009	427	Bacteria(100)-Firmicutes(100)-Clostridia(100)-Clostridiales(100)-Lachnospiraceae(100)-Lachnospiracea_incertae_sedis(100)-	4.3316e-05	9.07993e-05	0.00012316	0.000152652	6.70195e-05	6.1666e-05	1009
Otu1010	2757	Bacteria(100)-Firmicutes(100)-Clostridia(100)-Clostridiales(100)-Ruminococcaceae(100)-Acetivibrio(100)-	0.000501856	0.000291406	0.000192267	0.000154193	0.000395257	0.000375816	1010
Otu1011	20	Bacteria(100)-Firmicutes(100)-Clostridia(100)-Clostridiales(100)-Lachnospiraceae(100)-Robinsoniella(100)-	3.75884e-06	6.94762e-06	1.19883e-06	3.79102e-06	4.86671e-06	7.73662e-06	1011
Otu1012	29	Bacteria(100)-TM7(100)-TM7_class_incertae_sedis(100)-TM7_order_incertae_sedis(100)-TM7_family_incertae_sedis(100)-TM7_genus_incertae_sedis(100)-	7.32725e-06	7.30156e-06	2.0793e-06	4.44337e-06	3.56319e-06	8.28841e-06	1012
Otu1013	14	Bacteria(100)-Firmicutes(100)-Clostridia(100)-Clostridiales(100)-Ruminococcaceae(100)-Hydrogenoanaerobacterium(100)-	2.1932e-06	4.63027e-06	1.72539e-06	2.79047e-06	6.21156e-06	1.33046e-05	1013
Otu1014	17	Bacteria(100)-Firmicutes(100)-Clostridia(100)-Clostridiales(100)-Ruminococcaceae(100)-Oscillibacter(100)-	2.08834e-06	6.6039e-06	0	0	3.8904e-06	6.64702e-06	1014
Otu1015	1803	Bacteria(100)-Firmicutes(100)-Clostridia(100)-Clostridiales(100)-Lachnospiraceae(100)-Syntrophococcus(100)-	0.000750931	0.000645757	1.1938e-06	3.77513e-06	0.000809332	0.000634707	1015
Otu1016	1289	Bacteria(100)-Firmicutes(100)-Clostridia(100)-Clostridiales(100)-Clostridiales_Incertae_Sedis_XII(100)-Guggenheimella(100)-	1.26968e-06	4.01508e-06	3.16225e-05	5.54121e-05	0.000274535	0.000518962	1016
Otu1017	150	Bacteria(100)-Firmicutes(100)-Clostridia(100)-Clostridiales(100)-Ruminococcaceae(100)-Papillibacter(100)-	9.85019e-06	1.22464e-05	1.52493e-05	1.50924e-05	3.12008e-05	3.37543e-05	1017
Otu1018	61	Bacteria(100)-Bacteroidetes(100)-Bacteroidia(100)-Bacteroidales(100)-Porphyromonadaceae(100)-Parabacteroides(100)-	4.0216e-06	1.27174e-05	3.06937e-06	9.70619e-06	0	0	1018
Otu1019	32	Bacteria(100)-Firmicutes(100)-Clostridia(100)-Clostridiales(100)-Ruminococcaceae(100)-Hydrogenoanaerobacterium(100)-	1.15706e-05	1.72008e-05	4.95444e-07	1.56673e-06	9.83711e-06	1.01501e-05	1019
Otu1020	28	Bacteria(100)-Firmicutes(100)-Clostridia(100)-Clostridiales(100)-Lachnospiraceae(100)-Clostridium_XlVa(100)-	6.06995e-07	1.91949e-06	4.27109e-06	9.11753e-06	8.44053e-06	1.44145e-05	1020
Otu1021	145	Bacteria(100)-Firmicutes(100)-Clostridia(100)-Clostridiales(100)-Ruminococcaceae(100)-Ruminococcus(100)-	9.26531e-05	0.000263252	0	0	0	0	1021
Otu1022	4576	Bacteria(100)-Firmicutes(100)-Clostridia(100)-Clostridiales(100)-Clostridiaceae_1(100)-Clostridium_sensu_stricto(100)-	0.000967419	0.00211469	0.00168166	0.00308094	0.000767883	0.000958951	1022
Otu1023	80	Bacteria(100)-Firmicutes(100)-Clostridia(100)-Clostridiales(100)-Lachnospiraceae(100)-Howardella(100)-	5.20166e-05	9.97228e-05	0	0	9.73455e-07	2.92036e-06	1023
Otu1024	458	Bacteria(100)-Proteobacteria(100)-Deltaproteobacteria(100)-Bdellovibrionales(100)-Bdellovibrionaceae(100)-Vampirovibrio(100)-	1.28841e-06	2.72187e-06	7.83156e-05	0.000103094	5.34776e-05	7.05397e-05	1024
Otu1025	4815	Bacteria(100)-Firmicutes(100)-Clostridia(100)-Clostridiales(100)-Lachnospiraceae(100)-Parasporobacterium(100)-	0.0021275	0.00286562	0.000772206	0.00159794	0.000297548	0.000401976	1025
Otu1026	24	Bacteria(100)-Firmicutes(100)-Clostridia(100)-Clostridiales(100)-Ruminococcaceae(100)-Sporobacter(100)-	3.82251e-06	7.61091e-06	0	0	2.77337e-06	5.89963e-06	1026
Otu1027	22	Bacteria(100)-Firmicutes(100)-Clostridia(100)-Clostridiales(100)-Lachnospiraceae(100)-Lachnospiracea_incertae_sedis(100)-	1.21399e-06	3.83897e-06	0	0	1.9302e-05	2.97495e-05	1027
Otu1028	3174	Bacteria(100)-Firmicutes(100)-Clostridia(100)-Clostridiales(100)-Clostridiales_Incertae_Sedis_XII(100)-Acidaminobacter(100)-	0.000185069	0.000300224	0.00104355	0.00115746	7.26603e-05	7.52181e-05	1028
Otu1029	159	Bacteria(100)-Firmicutes(100)-Clostridia(100)-Clostridiales(100)-Lachnospiraceae(100)-Marvinbryantia(100)-	3.72138e-06	5.20705e-06	3.84429e-05	5.8045e-05	1.21275e-05	1.04192e-05	1029
Otu1030	1312	Bacteria(100)-Firmicutes(100)-Clostridia(100)-Thermoanaerobacterales(100)-Thermoanaerobacteraceae(100)-Thermanaeromonas(100)-	0.000274599	0.000208815	0.00015772	3.92264e-05	0.000173895	0.00011182	1030
Otu1031	63	Bacteria(100)-Firmicutes(100)-Clostridia(100)-Clostridiales(100)-Lachnospiraceae(100)-Clostridium_XlVb(100)-	1.07144e-05	2.24432e-05	2.90691e-06	6.50469e-06	2.28508e-06	6.85525e-06	1031
Otu1032	69	Bacteria(100)-Firmicutes(100)-Clostridia(100)-Clostridiales(100)-Ruminococcaceae(100)-Sporobacter(100)-	5.48559e-06	1.18247e-05	0	0	0	0	1032
Otu1033	19	Bacteria(100)-Firmicutes(100)-Clostridia(100)-Clostridiales(100)-Lachnospiraceae(100)-Acetitomaculum(100)-	5.1303e-06	7.36426e-06	0	0	1.4489e-05	2.24882e-05	1033
Otu1034	93	Bacteria(100)-Firmicutes(100)-Clostridia(100)-Clostridiales(100)-Lachnospiraceae(100)-Hespellia(100)-	1.58652e-05	2.31006e-05	5.05033e-06	5.92596e-06	7.58406e-06	8.90709e-06	1034
Otu1035	32	Bacteria(100)-Firmicutes(100)-Clostridia(100)-Clostridiales(100)-Clostridiales_Incertae_Sedis_XII(100)-Guggenheimella(100)-	3.05253e-06	5.6662e-06	1.49992e-06	3.22601e-06	8.98142e-06	1.61434e-05	1035
Otu1036	459	Bacteria(100)-Firmicutes(100)-Clostridia(100)-Clostridiales(100)-Lachnospiraceae(100)-Lachnospiracea_incertae_sedis(100)-	3.94549e-05	5.15171e-05	0.000140964	0.000184199	2.91611e-05	3.2471e-05	1036
Otu1037	15	Bacteria(100)-Actinobacteria(100)-Actinobacteria(100)-Coriobacteriales(100)-Coriobacteriaceae(100)-Coriobacterium(100)-	0	0	1.62254e-06	3.56341e-06	3.70322e-06	8.37127e-06	1037
Otu1038	4278	Bacteria(100)-Bacteroidetes(100)-Bacteroidia(100)-Bacteroidales(100)-Rikenellaceae(100)-Alistipes(100)-	0.000664944	0.00137046	0.000787758	0.00146795	0.00125842	0.00180301	1038
Otu1039	2047	Bacteria(100)-Firmicutes(100)-Clostridia(100)-Clostridiales(100)-Ruminococcaceae(100)-Hydrogenoanaerobacterium(100)-	0.000295641	0.000207224	0.000135215	7.41745e-05	0.000339438	0.00011242	1039
Otu1040	7938	Bacteria(100)-Bacteroidetes(100)-Bacteroidia(100)-Bacteroidales(100)-Porphyromonadaceae(100)-Odoribacter(100)-	2.75141e-06	3.59358e-06	0.00284706	0.00401194	0.000889225	0.00181366	1040
Otu1041	879	Bacteria(100)-Firmicutes(100)-Clostridia(100)-Clostridiales(100)-Lachnospiraceae(100)-Lachnospiracea_incertae_sedis(100)-	0.000119309	4.25768e-05	0.00013975	6.36614e-05	0.000148273	9.44173e-05	1041
Otu1042	861	Bacteria(100)-Firmicutes(100)-Clostridia(100)-Clostridiales(100)-Ruminococcaceae(100)-Acetanaerobacterium(100)-	0.000123379	0.000122315	0.00010073	6.17995e-05	9.77286e-05	7.49899e-05	1042
Otu1043	10	Bacteria(100)-Firmicutes(100)-Clostridia(100)-Clostridiales(100)-Ruminococcaceae(100)-Clostridium_IV(100)-	3.37471e-06	6.04655e-06	1.51413e-06	3.42202e-06	9.96351e-07	2.98905e-06	1043
Otu1044	860	Bacteria(100)-Bacteroidetes(100)-Bacteroidia(100)-Bacteroidales(100)-Rikenellaceae(100)-Alistipes(100)-	7.87167e-05	9.07687e-05	0.000128596	0.000198236	9.70671e-05	0.000104484	1044
Otu1045	13	Bacteria(100)-Actinobacteria(100)-Actinobacteria(100)-Coriobacteriales(100)-Coriobacteriaceae(100)-Paraeggerthella(100)-	4.13534e-06	4.70411e-06	0	0	8.54874e-06	9.67163e-06	1045
Otu1046	15	Bacteria(100)-Firmicutes(100)-Clostridia(100)-Clostridiales(100)-Clostridiaceae_1(100)-Thermobrachium(100)-	8.54e-07	2.70059e-06	5.11561e-07	1.6177e-06	1.01265e-05	1.11695e-05	1046
Otu1047	351	Bacteria(100)-Firmicutes(100)-Clostridia(100)-Clostridiales(100)-Clostridiaceae_1(100)-Oxobacter(100)-	0.000105257	0.000142628	3.1796e-05	3.77639e-05	9.9757e-05	7.83426e-05	1047
Otu1048	11	Bacteria(100)-Firmicutes(100)-Clostridia(100)-Clostridiales(100)-Ruminococcaceae(100)-Sporobacter(100)-	6.37104e-06	1.37492e-05	0	0	2.28508e-06	6.85525e-06	1048
Otu1049	264	Bacteria(100)-Firmicutes(100)-Clostridia(100)-Clostridiales(100)-Lachnospiraceae(100)-Clostridium_XlVa(100)-	4.475e-06	8.00619e-06	1.19883e-06	3.79102e-06	4.82402e-05	7.98386e-05	1049
Otu1050	14	Bacteria(100)-Firmicutes(100)-Clostridia(100)-Clostridiales(100)-Ruminococcaceae(100)-Flavonifractor(100)-	6.77448e-06	1.43322e-05	0	0	5.41788e-06	1.15663e-05	1050
Otu1051	10	Bacteria(100)-Firmicutes(100)-Clostridia(100)-Clostridiales(100)-Lachnospiraceae(100)-Robinsoniella(100)-	3.30018e-06	8.60892e-06	1.91602e-06	6.05899e-06	2.13889e-06	4.25696e-06	1051
Otu1052	10	Bacteria(100)-Proteobacteria(100)-Gammaproteobacteria(100)-Xanthomonadales(100)-Xanthomonadaceae(100)-Stenotrophomonas(100)-	0	0	4.95444e-07	1.56673e-06	2.73106e-06	4.11569e-06	1052
Otu1053	30	Bacteria(100)-Firmicutes(100)-Clostridia(100)-Clostridiales(100)-Ruminococcaceae(100)-Anaerotruncus(100)-	7.25347e-06	1.05685e-05	4.78334e-07	1.51262e-06	1.32739e-05	2.01402e-05	1053
Otu1054	108	Bacteria(100)-Firmicutes(100)-Clostridia(100)-Clostridiales(100)-Clostridiales_Incertae_Sedis_XII(100)-Guggenheimella(100)-	0	0	3.92784e-05	0.000124209	3.52186e-06	1.05656e-05	1054
Otu1055	120	Bacteria(100)-Firmicutes(100)-Clostridia(100)-Clostridiales(100)-Lachnospiraceae(100)-Lachnospiracea_incertae_sedis(100)-	9.36405e-06	1.62654e-05	0	0	0.00010284	0.000220261	1055
Otu1056	728	Bacteria(100)-Firmicutes(100)-Clostridia(100)-Clostridiales(100)-Lachnospiraceae(100)-Lachnospiracea_incertae_sedis(100)-	0.000370126	0.00113426	0	0	0.000168326	0.000462477	1056
Otu1057	10	Bacteria(100)-Firmicutes(100)-Clostridia(100)-Clostridiales(100)-Lachnospiraceae(100)-Dorea(100)-	1.65116e-06	3.63027e-06	4.09355e-06	8.00053e-06	2.93031e-06	4.39622e-06	1057
Otu1058	29	Bacteria(100)-Firmicutes(100)-Clostridia(100)-Clostridiales(100)-Ruminococcaceae(100)-Clostridium_IV(100)-	0	0	9.17131e-06	1.30004e-05	1.06383e-05	1.42173e-05	1058
Otu1059	304	Bacteria(100)-Proteobacteria(100)-Alphaproteobacteria(100)-Kiloniellales(100)-Kiloniellaceae(100)-Kiloniella(100)-	3.48519e-05	6.87981e-05	2.2388e-05	5.73835e-05	0.000126329	0.000100882	1059
Otu1060	352	Bacteria(100)-Firmicutes(100)-Clostridia(100)-Clostridiales(100)-Ruminococcaceae(100)-Anaerotruncus(100)-	6.3308e-05	7.77277e-05	2.91822e-05	3.88494e-05	4.14668e-05	3.96416e-05	1060
Otu1061	163	Bacteria(100)-Firmicutes(100)-Clostridia(100)-Clostridiales(100)-Clostridiales_Incertae_Sedis_XIII(100)-Anaerovorax(100)-	1.51491e-05	2.07871e-05	3.53241e-05	4.89035e-05	2.54515e-05	2.94001e-05	1061
Otu1062	481	Bacteria(100)-Firmicutes(100)-Erysipelotrichia(100)-Erysipelotrichales(100)-Erysipelotrichaceae(100)-Holdemania(100)-	6.18218e-05	7.37949e-05	8.31537e-05	9.00505e-05	2.49253e-05	3.97935e-05	1062
Otu1063	22666	Bacteria(100)-Proteobacteria(100)-Deltaproteobacteria(100)-Desulfovibrionales(100)-Desulfovibrionaceae(100)-Bilophila(100)-	0.00315172	0.00246385	0.00194761	0.000962175	0.00387131	0.0024209	1063
Otu1064	4031	Bacteria(100)-Bacteroidetes(100)-Sphingobacteria(100)-Sphingobacteriales(100)-Sphingobacteriaceae(100)-Nubsella(100)-	0.0014123	0.00115114	0.000290768	0.000191326	0.000348778	0.000294506	1064
Otu1065	10	Bacteria(100)-Firmicutes(100)-Clostridia(100)-Clostridiales(100)-Ruminococcaceae(100)-Hydrogenoanaerobacterium(100)-	2.87257e-06	9.08387e-06	0	0	1.05472e-06	3.16415e-06	1065
Otu1066	59	Bacteria(100)-Firmicutes(100)-Clostridia(100)-Clostridiales(100)-Lachnospiraceae(100)-Oribacterium(100)-	1.65116e-06	3.63027e-06	1.77099e-06	5.60037e-06	1.05322e-05	2.54928e-05	1066
Otu1067	64	Bacteria(100)-Firmicutes(100)-Clostridia(100)-Clostridiales(100)-Ruminococcaceae(100)-Oscillibacter(100)-	1.42851e-06	3.08278e-06	9.42382e-06	1.50186e-05	9.68245e-06	1.17295e-05	1067
Otu1068	418	Bacteria(100)-Firmicutes(100)-Clostridia(100)-Clostridiales(100)-Lachnospiraceae(100)-Syntrophococcus(100)-	4.2552e-05	7.09233e-05	5.0246e-05	7.15526e-05	2.85811e-05	2.01077e-05	1068
Otu1069	49	Bacteria(100)-Firmicutes(100)-Clostridia(100)-Clostridiales(100)-Clostridiaceae_1(100)-Anaerosporobacter(100)-	5.67347e-06	8.87214e-06	5.47353e-06	9.38845e-06	2.0898e-05	2.55518e-05	1069
Otu1070	5764	Bacteria(100)-Firmicutes(100)-Clostridia(100)-Clostridiales(100)-Lachnospiraceae(100)-Coprococcus(100)-	0.00267995	0.00286759	0.000292901	0.000912279	0.00149002	0.0018478	1070
Otu1071	119	Bacteria(100)-Firmicutes(100)-Clostridia(100)-Clostridiales(100)-Clostridiaceae_1(100)-Oxobacter(100)-	1.59732e-05	2.16378e-05	1.60947e-05	2.35873e-05	2.61965e-05	2.73901e-05	1071
Otu1072	2600	Bacteria(100)-Firmicutes(100)-Clostridia(100)-Clostridiales(100)-Lachnospiraceae(100)-Lachnospiracea_incertae_sedis(100)-	0.000333119	0.000291714	0.000413906	0.000375087	0.000437297	0.000306652	1072
Otu1073	237	Bacteria(100)-Firmicutes(100)-Clostridia(100)-Clostridiales(100)-Ruminococcaceae(100)-Acetivibrio(100)-	0.000105576	0.000152645	2.38895e-05	2.39211e-05	3.52755e-05	3.03427e-05	1073
Otu1074	25	Bacteria(100)-Firmicutes(100)-Clostridia(100)-Clostridiales(100)-Ruminococcaceae(100)-Hydrogenoanaerobacterium(100)-	4.58057e-06	1.00392e-05	0	0	2.35996e-05	3.16581e-05	1074
Otu1075	142	Bacteria(100)-Bacteroidetes(100)-Bacteroidia(100)-Bacteroidales(100)-Marinilabiaceae(100)-Alkaliflexus(100)-	1.78992e-05	4.03785e-05	1.91602e-06	6.05899e-06	7.31391e-06	2.19417e-05	1075
Otu1076	2005	Bacteria(100)-Firmicutes(100)-Clostridia(100)-Clostridiales(100)-Ruminococcaceae(100)-Clostridium_IV(100)-	0.000472642	0.00105794	0.000199683	0.000489124	0.000357646	0.000678074	1076
Otu1077	165	Bacteria(100)-Firmicutes(100)-Clostridia(100)-Clostridiales(100)-Clostridiaceae_1(100)-Oxobacter(100)-	2.9177e-05	2.71325e-05	7.94373e-06	1.92515e-05	3.29274e-05	2.2459e-05	1077
Otu1078	21	Bacteria(100)-Firmicutes(100)-Clostridia(100)-Clostridiales(100)-Ruminococcaceae(100)-Sporobacter(100)-	0	0	0	0	0	0	1078
Otu1079	283	Bacteria(100)-Firmicutes(100)-Clostridia(100)-Clostridiales(100)-Lachnospiraceae(100)-Dorea(100)-	9.08715e-05	6.62003e-05	1.28249e-05	9.54977e-06	0.000105552	0.00010099	1079
Otu1080	40	Bacteria(100)-Firmicutes(100)-Erysipelotrichia(100)-Erysipelotrichales(100)-Erysipelotrichaceae(100)-Holdemania(100)-	2.96117e-06	7.33632e-06	1.05711e-05	2.26239e-05	8.95228e-06	1.26364e-05	1080
Otu1081	169	Bacteria(100)-Actinobacteria(100)-Actinobacteria(100)-Coriobacteriales(100)-Coriobacteriaceae(100)-Olsenella(100)-	1.29658e-05	1.68433e-05	5.07586e-05	3.50066e-05	7.53426e-06	1.64467e-05	1081
Otu1082	23	Bacteria(100)-Firmicutes(100)-Clostridia(100)-Clostridiales(100)-Ruminococcaceae(100)-Acetivibrio(100)-	3.88823e-06	8.69924e-06	3.31039e-06	6.33402e-06	0	0	1082
Otu1083	69	Bacteria(100)-Firmicutes(100)-Clostridia(100)-Clostridiales(100)-Ruminococcaceae(100)-Butyricicoccus(100)-	2.96851e-06	7.5011e-06	4.64961e-06	8.26214e-06	2.49546e-05	2.65959e-05	1083
Otu1084	580	Bacteria(100)-Firmicutes(100)-Clostridia(100)-Clostridiales(100)-Ruminococcaceae(100)-Pseudoflavonifractor(100)-	2.5989e-05	2.75468e-05	7.04523e-05	0.000102584	5.78176e-05	5.69025e-05	1084
Otu1085	70	Bacteria(100)-Firmicutes(100)-Clostridia(100)-Clostridiales(100)-Ruminococcaceae(100)-Acetanaerobacterium(100)-	1.32456e-05	3.79194e-05	0	0	4.83014e-05	6.65783e-05	1085
Otu1086	141	Bacteria(100)-Proteobacteria(100)-Alphaproteobacteria(100)-Rhodospirillales(100)-Rhodospirillaceae(100)-Dongia(100)-	3.8747e-06	8.97417e-06	1.31765e-05	2.48824e-05	1.81998e-05	2.7761e-05	1086
Otu1087	108	Bacteria(100)-Firmicutes(100)-Clostridia(100)-Clostridiales(100)-Clostridiaceae_1(100)-Anaerosporobacter(100)-	7.8852e-05	8.98597e-05	0	0	4.87243e-06	6.13446e-06	1087
Otu1088	26	Bacteria(100)-Firmicutes(100)-Clostridia(100)-Clostridiales(100)-Lachnospiraceae(100)-Johnsonella(100)-	2.13088e-06	3.48022e-06	4.73063e-06	6.44836e-06	3.84499e-06	4.59272e-06	1088
Otu1089	165	Bacteria(100)-Firmicutes(100)-Clostridia(100)-Clostridiales(100)-Lachnospiraceae(100)-Clostridium_XlVa(100)-	3.85688e-05	4.98753e-05	1.30377e-05	2.52187e-05	4.24092e-05	4.67405e-05	1089
Otu1090	87	Bacteria(100)-Firmicutes(100)-Clostridia(100)-Clostridiales(100)-Lachnospiraceae(100)-Marvinbryantia(100)-	0	0	3.29603e-05	9.2687e-05	3.84202e-06	1.1526e-05	1090
Otu1091	16	Bacteria(100)-Firmicutes(100)-Clostridia(100)-Clostridiales(100)-Clostridiales_Incertae_Sedis_XII(100)-Guggenheimella(100)-	2.58449e-06	3.36266e-06	1.22823e-06	2.58933e-06	2.98905e-06	8.96716e-06	1091
Otu1092	2557	Bacteria(100)-Firmicutes(100)-Clostridia(100)-Clostridiales(100)-Ruminococcaceae(100)-Ruminococcus(100)-	0.000237784	0.000537709	0.000251457	0.000254669	0.000298783	0.000179453	1092
Otu1093	25	Bacteria(100)-Firmicutes(100)-Clostridia(100)-Clostridiales(100)-Lachnospiraceae(100)-Clostridium_XlVb(100)-	0	0	0	0	0	0	1093
Otu1094	552	Bacteria(100)-Firmicutes(100)-Clostridia(100)-Clostridiales(100)-Lachnospiraceae(100)-Syntrophococcus(100)-	1.50201e-05	3.15458e-05	2.21248e-06	4.68255e-06	0.000327539	0.000806998	1094
Otu1095	784	Bacteria(100)-Firmicutes(100)-Negativicutes(100)-Selenomonadales(100)-Veillonellaceae(100)-Anaerovibrio(100)-	0.00017425	0.000160041	0.000148679	0.000246074	7.83065e-05	7.26604e-05	1095
Otu1096	308	Bacteria(100)-Actinobacteria(100)-Actinobacteria(100)-Coriobacteriales(100)-Coriobacteriaceae(100)-Adlercreutzia(100)-	2.63343e-05	2.33371e-05	3.01037e-05	2.17755e-05	4.90858e-05	5.68862e-05	1096
Otu1097	2616	Bacteria(100)-Firmicutes(100)-Clostridia(100)-Clostridiales(100)-Gracilibacteraceae(100)-Lutispora(100)-	0.000344872	0.000254545	0.000356503	0.000213688	0.000559887	0.000524081	1097
Otu1098	244	Bacteria(100)-Firmicutes(100)-Clostridia(100)-Clostridiales(100)-Peptostreptococcaceae(100)-Proteocatella(100)-	6.15846e-05	8.1929e-05	2.42557e-05	2.91317e-05	2.57316e-05	2.37862e-05	1098
Otu1099	1411	Bacteria(100)-Proteobacteria(100)-Deltaproteobacteria(100)-Bdellovibrionales(100)-Bdellovibrionaceae(100)-Vampirovibrio(100)-	0.000107816	0.000131145	0.000118131	0.000114161	0.000265337	0.000275009	1099
Otu1100	194	Bacteria(100)-Firmicutes(100)-Clostridia(100)-Clostridiales(100)-Lachnospiraceae(100)-Lachnospira(100)-	2.17428e-05	2.33583e-05	7.07975e-05	0.000134312	1.30006e-05	2.41773e-05	1100
Otu1101	36	Bacteria(100)-Firmicutes(100)-Clostridia(100)-Clostridiales(100)-Lachnospiraceae(100)-Lachnospiracea_incertae_sedis(100)-	2.5245e-06	5.72191e-06	6.27685e-06	5.77943e-06	5.45693e-06	6.9391e-06	1101
Otu1102	772	Bacteria(100)-Firmicutes(100)-Clostridia(100)-Clostridiales(100)-Gracilibacteraceae(100)-Lutispora(100)-	8.72957e-05	6.83949e-05	0.000180573	0.000125054	2.72593e-05	2.59883e-05	1102
Otu1103	423	Bacteria(100)-Actinobacteria(100)-Actinobacteria(100)-Coriobacteriales(100)-Coriobacteriaceae(100)-Asaccharobacter(100)-	8.91199e-05	0.000114065	5.79741e-05	3.74532e-05	3.86812e-05	3.26974e-05	1103
Otu1104	338	Bacteria(100)-Proteobacteria(100)-Alphaproteobacteria(100)-Rhodospirillales(100)-Rhodospirillaceae(100)-Insolitispirillum(100)-	4.63345e-05	0.000119898	6.86417e-06	7.83066e-06	5.6337e-05	5.66259e-05	1104
Otu1105	3155	Bacteria(100)-Firmicutes(100)-Clostridia(100)-Clostridiales(100)-Ruminococcaceae(100)-Sporobacter(100)-	0.000369232	0.000819418	0.0008524	0.00100575	0.000991976	0.00099125	1105
Otu1106	132	Bacteria(100)-Bacteroidetes(100)-Bacteroidia(100)-Bacteroidales(100)-Porphyromonadaceae(100)-Tannerella(100)-	4.99982e-05	4.99304e-05	0	0	7.27145e-05	5.68675e-05	1106
Otu1107	349	Bacteria(100)-Proteobacteria(100)-Alphaproteobacteria(100)-Rhizobiales(100)-Rhodobiaceae(100)-Roseospirillum(100)-	6.17758e-05	5.94255e-05	2.13642e-05	3.36415e-05	5.32437e-05	7.33225e-05	1107
Otu1108	16	Bacteria(100)-Actinobacteria(100)-Actinobacteria(100)-Coriobacteriales(100)-Coriobacteriaceae(100)-Enterorhabdus(100)-	2.96078e-06	5.07839e-06	1.21322e-06	2.55791e-06	2.69565e-06	5.50924e-06	1108
Otu1109	20	Bacteria(100)-Firmicutes(100)-Clostridia(100)-Clostridiales(100)-Clostridiales_Incertae_Sedis_XI(100)-Soehngenia(100)-	2.29806e-06	7.2671e-06	3.49858e-06	7.52598e-06	9.29567e-06	2.7887e-05	1109
Otu1110	1690	Bacteria(100)-Firmicutes(100)-Clostridia(100)-Clostridiales(100)-Lachnospiraceae(100)-Lachnospiracea_incertae_sedis(100)-	0.000252811	0.00031054	0.000345272	0.000545062	0.000138052	8.05638e-05	1110
Otu1111	168	Bacteria(100)-Firmicutes(100)-Clostridia(100)-Clostridiales(100)-Lachnospiraceae(100)-Acetitomaculum(100)-	8.75197e-06	1.38753e-05	4.19197e-05	4.68328e-05	1.22146e-05	1.19465e-05	1111
Otu1112	186	Bacteria(100)-Firmicutes(100)-Clostridia(100)-Clostridiales(100)-Lachnospiraceae(100)-Sporobacterium(100)-	3.91702e-05	4.78866e-05	3.75871e-05	7.22561e-05	4.12343e-05	4.79856e-05	1112
Otu1113	10578	Bacteria(100)-Firmicutes(100)-Clostridia(100)-Clostridiales(100)-Ruminococcaceae(100)-Ruminococcus(100)-	0.00155633	0.00196058	0.000706908	0.000563926	0.00194199	0.00129377	1113
Otu1114	493	Bacteria(100)-Firmicutes(100)-Clostridia(100)-Clostridiales(100)-Lachnospiraceae(100)-Clostridium_XlVb(100)-	0.000118958	0.000251665	1.06615e-05	1.71291e-05	8.98206e-06	1.08033e-05	1114
Otu1115	145	Bacteria(100)-Firmicutes(100)-Clostridia(100)-Clostridiales(100)-Ruminococcaceae(100)-Anaerotruncus(100)-	2.14801e-05	1.65552e-05	1.52642e-05	1.80285e-05	1.65973e-05	1.89725e-05	1115
Otu1116	213	Bacteria(100)-Firmicutes(100)-Clostridia(100)-Clostridiales(100)-Ruminococcaceae(100)-Anaerotruncus(100)-	6.82663e-05	7.10023e-05	1.62172e-05	2.47827e-05	7.26948e-05	6.27168e-05	1116
Otu1117	43	Bacteria(100)-Firmicutes(100)-Clostridia(100)-Clostridiales(100)-Syntrophomonadaceae(100)-Pelospora(100)-	4.9767e-06	1.01533e-05	2.89099e-06	5.77753e-06	1.18602e-05	9.97176e-06	1117
Otu1118	244	Bacteria(100)-Proteobacteria(100)-Betaproteobacteria(100)-Burkholderiales(100)-Sutterellaceae(100)-Sutterella(100)-	5.20164e-05	5.01793e-05	1.93502e-05	4.39279e-05	2.32548e-05	4.77152e-05	1118
Otu1119	781	Bacteria(100)-Bacteroidetes(100)-Bacteroidia(100)-Bacteroidales(100)-Rikenellaceae(100)-Alistipes(100)-	0.00014995	0.000164378	0.000101757	0.000174661	8.31754e-05	0.000121985	1119
Otu1120	58	Bacteria(100)-Proteobacteria(100)-Deltaproteobacteria(100)-Bdellovibrionales(100)-Bdellovibrionaceae(100)-Vampirovibrio(100)-	9.32555e-06	1.51342e-05	1.63754e-06	3.58413e-06	8.64454e-06	2.59336e-05	1120
Otu1121	11	Bacteria(100)-Firmicutes(100)-Clostridia(100)-Clostridiales(100)-Lachnospiraceae(100)-Clostridium_XlVa(100)-	1.14903e-06	3.63355e-06	1.49992e-06	3.22601e-06	0	0	1121
Otu1122	22	Bacteria(100)-Firmicutes(100)-Clostridia(100)-Clostridiales(100)-Ruminococcaceae(100)-Clostridium_IV(100)-	6.31063e-06	8.84153e-06	0	0	1.38117e-05	2.50541e-05	1122
Otu1123	459	Bacteria(100)-Firmicutes(100)-Clostridia(100)-Clostridiales(100)-Ruminococcaceae(100)-Flavonifractor(100)-	9.92783e-05	6.3652e-05	6.06826e-05	3.91696e-05	6.28284e-05	4.54292e-05	1123
Otu1124	1066	Bacteria(100)-Firmicutes(100)-Clostridia(100)-Clostridiales(100)-Clostridiales_Incertae_Sedis_XII(100)-Guggenheimella(100)-	0.000157224	0.000137954	0.000125563	0.000140616	0.000153173	0.000156027	1124
Otu1125	20	Bacteria(100)-Firmicutes(100)-Clostridia(100)-Clostridiales(100)-Clostridiales_Incertae_Sedis_XII(100)-Guggenheimella(100)-	9.11895e-06	1.48428e-05	4.42748e-06	1.40009e-05	9.96351e-07	2.98905e-06	1125
Otu1126	6821	Bacteria(100)-Bacteroidetes(100)-Bacteroidia(100)-Bacteroidales(100)-Bacteroidales_incertae_sedis(100)-Phocaeicola(100)-	0.00158225	0.000900528	0.000774589	0.000430756	0.00107946	0.00053302	1126
Otu1127	1025	Bacteria(100)-Firmicutes(100)-Erysipelotrichia(100)-Erysipelotrichales(100)-Erysipelotrichaceae(100)-Allobaculum(100)-	4.62661e-05	6.02882e-05	0.000123279	0.000189552	0.000129083	9.20474e-05	1127
Otu1128	14	Bacteria(100)-Firmicutes(100)-Clostridia(100)-Clostridiales(100)-Ruminococcaceae(100)-Acetanaerobacterium(100)-	2.1932e-06	4.63027e-06	4.95444e-07	1.56673e-06	3.86745e-06	6.41732e-06	1128
Otu1129	179	Bacteria(100)-Firmicutes(100)-Clostridia(100)-Clostridiales(100)-Eubacteriaceae(100)-Alkalibacter(100)-	1.43584e-05	1.40666e-05	3.70315e-05	2.80763e-05	1.35797e-05	1.41604e-05	1129
Otu1130	1286	Bacteria(100)-Actinobacteria(100)-Actinobacteria(100)-Coriobacteriales(100)-Coriobacteriaceae(100)-Gordonibacter(100)-	0.000220173	0.000103452	0.000113419	6.15647e-05	0.00024256	9.88199e-05	1130
Otu1131	467	Bacteria(100)-Firmicutes(100)-Clostridia(100)-Clostridiales(100)-Lachnospiraceae(100)-Dorea(100)-	5.2641e-05	3.66647e-05	5.72697e-05	5.88908e-05	6.38197e-05	4.0823e-05	1131
Otu1132	73	Bacteria(100)-Firmicutes(100)-Clostridia(100)-Clostridiales(100)-Ruminococcaceae(100)-Ruminococcus(100)-	1.05825e-05	1.24961e-05	1.3362e-05	1.98766e-05	1.95597e-05	2.25479e-05	1132
Otu1133	56	Bacteria(100)-Firmicutes(100)-Clostridia(100)-Clostridiales(100)-Ruminococcaceae(100)-Oscillibacter(100)-	6.55438e-06	1.1856e-05	0	0	2.75392e-05	2.35291e-05	1133
Otu1134	21566	Bacteria(100)-Firmicutes(100)-Clostridia(100)-Clostridiales(100)-Ruminococcaceae(100)-Ruminococcus(100)-	0.00767584	0.0126575	3.58141e-06	1.13254e-05	0.0123767	0.0125973	1134
Otu1135	739	Bacteria(100)-Firmicutes(100)-Clostridia(100)-Clostridiales(100)-Lachnospiraceae(100)-Acetitomaculum(100)-	0.000196052	0.000371238	0.000142404	0.000362966	5.70084e-05	9.71315e-05	1135
Otu1136	248	Bacteria(100)-Firmicutes(100)-Clostridia(100)-Clostridiales(100)-Clostridiales_Incertae_Sedis_XII(100)-Guggenheimella(100)-	7.43015e-05	0.000234962	2.84843e-05	4.73636e-05	0	0	1136
Otu1137	490	Bacteria(100)-Firmicutes(100)-Clostridia(100)-Clostridiales(100)-Ruminococcaceae(100)-Papillibacter(100)-	3.50185e-05	3.53959e-05	3.58793e-05	2.89893e-05	0.000106366	4.60904e-05	1137
Otu1138	5298	Bacteria(100)-Firmicutes(100)-Clostridia(100)-Clostridiales(100)-Ruminococcaceae(100)-Ruminococcus(100)-	0.00245782	0.00491235	0.000422315	0.000385131	0.00017649	0.000175109	1138
Otu1139	3849	Bacteria(100)-Firmicutes(100)-Clostridia(100)-Clostridiales(100)-Clostridiales_Incertae_Sedis_XII(100)-Acidaminobacter(100)-	0.00044151	0.000334991	0.000485873	0.000413978	0.000788627	0.000315696	1139
Otu1140	49	Bacteria(100)-Proteobacteria(100)-Betaproteobacteria(100)-Burkholderiales(100)-Comamonadaceae(100)-Delftia(100)-	2.60053e-06	4.25321e-06	1.3779e-05	2.32746e-05	1.5092e-05	2.30731e-05	1140
Otu1141	104	Bacteria(100)-Firmicutes(100)-Clostridia(100)-Clostridiales(100)-Lachnospiraceae(100)-Clostridium_XlVb(100)-	1.13923e-05	2.11252e-05	9.90889e-07	3.13347e-06	4.67691e-05	6.34871e-05	1141
Otu1142	733	Bacteria(100)-Firmicutes(100)-Clostridia(100)-Clostridiales(100)-Lachnospiraceae(100)-Lachnospiracea_incertae_sedis(100)-	8.82495e-05	0.000109567	6.23635e-05	6.81708e-05	0.000114046	0.000164226	1142
Otu1143	497	Bacteria(100)-Proteobacteria(100)-Alphaproteobacteria(100)-Kiloniellales(100)-Kiloniellaceae(100)-Kiloniella(100)-	0.000112517	0.000208795	1.78049e-05	2.44614e-05	0.000145441	0.000179974	1143
Otu1144	91	Bacteria(100)-Firmicutes(100)-Clostridia(100)-Clostridiales(100)-Lachnospiraceae(100)-Syntrophococcus(100)-	8.28437e-06	1.40238e-05	7.06716e-06	1.28864e-05	1.41081e-05	1.83699e-05	1144
Otu1145	84	Bacteria(100)-Firmicutes(100)-Clostridia(100)-Clostridiales(100)-Ruminococcaceae(100)-Clostridium_III(100)-	5.11418e-05	5.70227e-05	0	0	5.5467e-06	5.77736e-06	1145
Otu1146	23	Bacteria(100)-Firmicutes(100)-Clostridia(100)-Clostridiales(100)-Clostridiaceae_2(100)-Anoxynatronum(100)-	0	0	1.39706e-06	3.07431e-06	0	0	1146
Otu1147	3539	Bacteria(100)-Firmicutes(100)-Clostridia(100)-Clostridiales(100)-Lachnospiraceae(100)-Clostridium_XlVa(100)-	0.000282015	0.000502541	0.00015328	0.000134508	0.00114297	0.0028443	1147
Otu1148	88	Bacteria(100)-Firmicutes(100)-Clostridia(100)-Clostridiales(100)-Ruminococcaceae(100)-Pseudoflavonifractor(100)-	2.1534e-05	2.64175e-05	1.91334e-06	6.0505e-06	3.20949e-05	2.20604e-05	1148
Otu1149	2502	Bacteria(100)-Firmicutes(100)-Clostridia(100)-Clostridiales(100)-Ruminococcaceae(100)-Ethanoligenens(100)-	0.000400149	0.000497355	0.000416551	0.000224063	0.000147618	0.000201773	1149
Otu1150	187	Bacteria(100)-Firmicutes(100)-Clostridia(100)-Clostridiales(100)-Ruminococcaceae(100)-Sporobacter(100)-	8.63684e-06	1.86984e-05	1.51787e-05	1.46276e-05	5.26574e-05	5.11134e-05	1150
Otu1151	20	Bacteria(100)-Firmicutes(100)-Clostridia(100)-Clostridiales(100)-Clostridiaceae_1(100)-Anaerosporobacter(100)-	1.62799e-05	2.60003e-05	0	0	1.05472e-06	3.16415e-06	1151
Otu1152	662	Bacteria(100)-Firmicutes(100)-Clostridia(100)-Clostridiales(100)-Lachnospiraceae(100)-Coprococcus(100)-	6.01563e-05	1.97971e-05	7.97199e-05	4.73597e-05	9.3661e-05	7.28454e-05	1152
Otu1153	64	Bacteria(100)-Firmicutes(100)-Clostridia(100)-Clostridiales(100)-Ruminococcaceae(100)-Faecalibacterium(100)-	2.26515e-05	2.91061e-05	1.58758e-06	2.5798e-06	7.78995e-06	1.30757e-05	1153
Otu1154	15	Bacteria(100)-Firmicutes(100)-Clostridia(100)-Clostridiales(100)-Clostridiales_Incertae_Sedis_XII(100)-Acidaminobacter(100)-	9.30117e-06	2.139e-05	0	0	1.96895e-06	3.91979e-06	1154
Otu1155	81	Bacteria(100)-Firmicutes(100)-Clostridia(100)-Clostridiales(100)-Clostridiales_Incertae_Sedis_XIII(100)-Anaerovorax(100)-	0	0	5.53052e-06	1.16706e-05	8.257e-06	2.2137e-05	1155
Otu1156	136	Bacteria(100)-Firmicutes(100)-Clostridia(100)-Clostridiales(100)-Ruminococcaceae(100)-Flavonifractor(100)-	4.61233e-06	6.75387e-06	2.59555e-06	4.30553e-06	3.80604e-06	7.55496e-06	1156
Otu1157	14	Bacteria(100)-Firmicutes(100)-Clostridia(100)-Clostridiales(100)-Lachnospiraceae(100)-Syntrophococcus(100)-	6.81417e-07	2.15483e-06	1.90862e-06	4.03678e-06	3.5749e-06	5.64106e-06	1157
Otu1158	17	Bacteria(100)-Firmicutes(100)-Clostridia(100)-Clostridiales(100)-Ruminococcaceae(100)-Anaerotruncus(100)-	5.42694e-06	5.63952e-06	1.46957e-06	3.27196e-06	0	0	1158
Otu1159	779	Bacteria(100)-Firmicutes(100)-Clostridia(100)-Clostridiales(100)-Lachnospiraceae(100)-Coprococcus(100)-	7.65749e-05	0.000141415	0.000240739	0.000520609	5.38002e-05	6.86596e-05	1159
Otu1160	183	Bacteria(100)-Firmicutes(100)-Clostridia(100)-Clostridiales(100)-Ruminococcaceae(100)-Oscillibacter(100)-	1.89234e-05	4.61387e-05	1.22761e-06	3.88205e-06	4.39204e-05	8.76308e-05	1160
Otu1161	38	Bacteria(100)-Firmicutes(100)-Clostridia(100)-Clostridiales(100)-Ruminococcaceae(100)-Clostridium_IV(100)-	6.88287e-06	8.52348e-06	3.58329e-06	3.99145e-06	5.06264e-06	8.10957e-06	1161
Otu1162	1869	Bacteria(100)-Firmicutes(100)-Clostridia(100)-Clostridiales(100)-Gracilibacteraceae(100)-Lutispora(100)-	0.000126711	8.96822e-05	0.00018004	0.000103012	0.000386317	0.0002047	1162
Otu1163	66	Bacteria(100)-Firmicutes(100)-Clostridia(100)-Clostridiales(100)-Ruminococcaceae(100)-Ruminococcus(100)-	2.96554e-06	4.0232e-06	2.08399e-06	3.5319e-06	3.06775e-05	2.75419e-05	1163
Otu1164	10	Bacteria(100)-Firmicutes(100)-Clostridia(100)-Clostridiales(100)-Ruminococcaceae(100)-Ethanoligenens(100)-	0	0	0	0	1.07491e-05	2.23461e-05	1164
Otu1165	221	Bacteria(100)-Firmicutes(100)-Clostridia(100)-Clostridiales(100)-Clostridiales_Incertae_Sedis_XIII(100)-Anaerovorax(100)-	1.69502e-05	3.92038e-05	1.40082e-05	2.94815e-05	1.51013e-05	1.44185e-05	1165
Otu1166	327	Bacteria(100)-Firmicutes(100)-Clostridia(100)-Clostridiales(100)-Lachnospiraceae(100)-Parasporobacterium(100)-	0.000106692	0.000141648	0	0	0.000208865	0.000315717	1166
Otu1167	32	Bacteria(100)-Firmicutes(100)-Clostridia(100)-Clostridiales(100)-Incertae_Sedis_XI(100)-Dethiosulfatibacter(100)-	4.82763e-06	8.92861e-06	6.62514e-06	7.41946e-06	1.79392e-06	3.57631e-06	1167
Otu1168	421	Bacteria(100)-Firmicutes(100)-Erysipelotrichia(100)-Erysipelotrichales(100)-Erysipelotrichaceae(100)-Holdemania(100)-	0.000106923	0.000188515	4.61185e-05	0.000124137	6.25662e-05	0.000140133	1168
Otu1169	37	Bacteria(100)-Firmicutes(100)-Clostridia(100)-Clostridiales(100)-Peptostreptococcaceae(100)-Acetoanaerobium(100)-	1.03838e-05	2.60633e-05	0	0	2.67631e-05	6.09751e-05	1169
Otu1170	278	Bacteria(100)-Firmicutes(100)-Clostridia(100)-Clostridiales(100)-Lachnospiraceae(100)-Lachnospiracea_incertae_sedis(100)-	3.31334e-05	0.000102405	7.50218e-05	0.000180255	0.000166006	0.000339127	1170
Otu1171	28	Bacteria(100)-Firmicutes(100)-Clostridia(100)-Clostridiales(100)-Ruminococcaceae(100)-Acetanaerobacterium(100)-	3.44239e-06	3.73875e-06	5.87292e-06	7.75611e-06	0	0	1171
Otu1172	75	Bacteria(100)-Firmicutes(100)-Clostridia(100)-Clostridiales(100)-Lachnospiraceae(100)-Syntrophococcus(100)-	8.72734e-06	1.1112e-05	1.27365e-05	1.93977e-05	7.34816e-06	1.06186e-05	1172
Otu1173	67	Bacteria(100)-Firmicutes(100)-Clostridia(100)-Clostridiales(100)-Lachnospiraceae(100)-Hespellia(100)-	1.13626e-05	2.42822e-05	2.32729e-05	6.37644e-05	1.92275e-05	2.63385e-05	1173
Otu1174	12	Bacteria(100)-Firmicutes(100)-Clostridia(100)-Clostridiales(100)-Ruminococcaceae(100)-Clostridium_IV(100)-	2.36151e-06	7.46776e-06	9.5801e-07	3.02949e-06	2.02817e-06	4.02868e-06	1174
Otu1175	461	Bacteria(100)-Actinobacteria(100)-Actinobacteria(100)-Coriobacteriales(100)-Coriobacteriaceae(100)-Paraeggerthella(100)-	2.49362e-05	3.55833e-05	2.75409e-05	3.11868e-05	1.90648e-05	2.50124e-05	1175
Otu1176	25	Bacteria(100)-Firmicutes(100)-Clostridia(100)-Clostridiales(100)-Clostridiales_Incertae_Sedis_XII(100)-Guggenheimella(100)-	1.42349e-06	3.04135e-06	3.3168e-06	6.16962e-06	8.89018e-06	1.46142e-05	1176
Otu1177	31	Bacteria(100)-Firmicutes(100)-Clostridia(100)-Clostridiales(100)-Lachnospiraceae(100)-Blautia(100)-	0	0	2.85231e-05	9.0198e-05	0	0	1177
Otu1178	1666	Bacteria(100)-Bacteroidetes(100)-Bacteroidia(100)-Bacteroidales(100)-Porphyromonadaceae(100)-Barnesiella(100)-	0.000188291	0.000190326	0.000362507	0.000265063	0.000205291	6.14101e-05	1178
Otu1179	150	Bacteria(100)-Firmicutes(100)-Clostridia(100)-Clostridiales(100)-Lachnospiraceae(100)-Lachnospiracea_incertae_sedis(100)-	9.85962e-06	1.46373e-05	1.56063e-05	2.44948e-05	2.13889e-06	4.25696e-06	1179
Otu1180	7714	Bacteria(100)-Proteobacteria(100)-Deltaproteobacteria(100)-Bdellovibrionales(100)-Bdellovibrionaceae(100)-Vampirovibrio(100)-	0.000835435	0.00113089	0.000461915	0.000256086	0.00208217	0.0012913	1180
Otu1181	33	Bacteria(100)-Firmicutes(100)-Clostridia(100)-Clostridiales(100)-Lachnospiraceae(100)-Lachnospiracea_incertae_sedis(100)-	0	0	2.45522e-06	7.7641e-06	1.23921e-05	2.16828e-05	1181
Otu1182	17	Bacteria(100)-Firmicutes(100)-Clostridia(100)-Clostridiales(100)-Lachnospiraceae(100)-Blautia(100)-	0	0	1.01868e-06	3.22136e-06	1.76888e-05	3.26711e-05	1182
Otu1183	10	Bacteria(100)-Firmicutes(100)-Clostridia(100)-Clostridiales(100)-Clostridiales_Incertae_Sedis_XII(100)-Fusibacter(100)-	3.20703e-06	5.54874e-06	2.24933e-06	5.63646e-06	0	0	1183
Otu1184	95	Bacteria(100)-Firmicutes(100)-Clostridia(100)-Clostridiales(100)-Ruminococcaceae(100)-Acetivibrio(100)-	4.73703e-05	3.17215e-05	0	0	2.88551e-05	4.56143e-05	1184

## Sheet: SignificantDifferencesOTUs
Comparison Age_8_Age_18	Taxonomy	MeanAge8	StdAge8	MeanAge18	StdAge18	MeanAge24	StdAge24		INCREASE WITH AGE			A8-A18	A8-A24	A18-A24
Otu0134	Bacteria(100)-Firmicutes(100)-Clostridia(100)-Clostridiales(100)-Lachnospiraceae(100)-Syntrophococcus(91)-	0.000212939	8.7691e-05	0.000511794	0.000432545	0.000253438	0.000111595		1			1	1	-1
Otu0177	Bacteria(100)-Firmicutes(100)-Negativicutes(100)-Selenomonadales(100)-Veillonellaceae(100)-Anaerosinus(100)-	0.000362298	0.00036216	6.3448e-05	7.63421e-05	0.00162939	0.00261648		-1			-1	1	1
Otu0229	Bacteria(100)-Firmicutes(100)-Clostridia(100)-Clostridiales(100)-Lachnospiraceae(100)-Lachnospiracea_incertae_sedis(100)-	0.000517905	0.000734107	0	0	0.000541865	0.000709437		-1			-1	1	1
Otu0319	Bacteria(100)-Firmicutes(100)-Clostridia(100)-Clostridiales(100)-Ruminococcaceae(100)-Ruminococcus(100)-	0.000194545	0.000158457	0.00391	0.00480013	0.00205057	0.00265604		1			1	1	-1
Otu0354	Bacteria(100)-Firmicutes(100)-Clostridia(100)-Clostridiales(100)-Lachnospiraceae(100)-Acetitomaculum(100)-	0.000102009	0.000100284	0	0	0.000111261	8.67133e-05		-1			-1	1	1
Otu0496	Bacteria(100)-Firmicutes(100)-Clostridia(100)-Clostridiales(100)-Lachnospiraceae(100)-Dorea(100)-	0.000262177	0.000291711	1.0152e-05	1.45744e-05	0.000150394	0.000154251		-1			-1	-1	1
Otu0499	Bacteria(100)-Firmicutes(100)-Clostridia(100)-Clostridiales(100)-Lachnospiraceae(100)-Lachnospiracea_incertae_sedis(100)-	4.06919e-05	4.89402e-05	0	0	0.000425002	0.000621619		-1			-1	1	1
Otu0550	Bacteria(100)-Elusimicrobia(100)-Elusimicrobia(100)-Elusimicrobiales(100)-Elusimicrobiaceae(100)-Elusimicrobium(100)-	0.000806825	0.000748871	0.000100725	0.000188049	0.000496442	0.000367073		-1			-1	-1	1
Otu0557	Bacteria(100)-Firmicutes(100)-Clostridia(100)-Clostridiales(100)-Ruminococcaceae(100)-Clostridium_IV(100)-	0	0	0.000748219	0.000650186	0.00031107	0.000305802		1			1	1	-1
Otu0560	Bacteria(100)-Firmicutes(100)-Clostridia(100)-Clostridiales(100)-Clostridiaceae_4(100)-Thermotalea(92)-	1.96553e-06	4.21717e-06	9.99614e-05	6.78959e-05	1.19882e-05	1.8223e-05		1			1	1	-1
Otu0570	Bacteria(100)-Firmicutes(100)-Clostridia(100)-Clostridiales(100)-Ruminococcaceae(100)-Clostridium_IV(100)-	0.000129371	0.000111736	0	0	6.46039e-05	9.47869e-05		-1			-1	-1	1
Otu0595	Bacteria(100)-Firmicutes(100)-Clostridia(100)-Clostridiales(100)-Lachnospiraceae(100)-Acetitomaculum(100)-	0.000167201	0.000159753	0	0	6.19913e-05	9.88323e-05		-1			-1	-1	1
Otu0630	Bacteria(100)-Firmicutes(100)-Clostridia(100)-Clostridiales(100)-Lachnospiraceae(100)-Clostridium_XlVb(100)-	0.000351373	0.000690118	0	0	0.000283747	0.000318273		-1			-1	-1	1
Otu0638	Bacteria(100)-Proteobacteria(100)-Alphaproteobacteria(100)-Rickettsiales(100)-Rickettsiaceae(100)-Orientia(100)-	5.53794e-05	2.9482e-05	0	0	1.42774e-05	2.99475e-05		-1			-1	-1	1
Otu0728	Bacteria(100)-Firmicutes(100)-Clostridia(100)-Clostridiales(100)-Lachnospiraceae(100)-Lachnospiracea_incertae_sedis(100)-	0.000130261	0.00012117	0	0	1.49894e-05	1.51506e-05		-1			-1	-1	1
Otu0782	Bacteria(100)-Firmicutes(100)-Clostridia(100)-Clostridiales(100)-Lachnospiraceae(100)-Acetitomaculum(100)-	9.88527e-05	0.000115116	0	0	8.4066e-05	8.0896e-05		-1			-1	-1	1
Otu0809	Bacteria(100)-Firmicutes(100)-Clostridia(100)-Clostridiales(100)-Lachnospiraceae(100)-Lachnobacterium(100)-	0.000146076	0.000270574	0	0	0.000391833	0.000350352		-1			-1	1	1
Otu0829	Bacteria(100)-Firmicutes(100)-Clostridia(100)-Clostridiales(100)-Lachnospiraceae(100)-Roseburia(100)-	4.73903e-05	5.43349e-05	0	0	3.7405e-05	4.52688e-05		-1			-1	-1	1
Otu0874	Bacteria(100)-Firmicutes(100)-Clostridia(100)-Clostridiales(100)-Ruminococcaceae(100)-Clostridium_III(100)-	3.30323e-05	3.00161e-05	0	0	2.69167e-05	2.92375e-05		-1			-1	-1	1
Otu0892	Bacteria(100)-Firmicutes(100)-Clostridia(100)-Clostridiales(100)-Clostridiales_Incertae_Sedis_XIII(100)-Anaerovorax(100)-	0.000189025	0.000205366	0	0	0.000248343	0.0002708		-1			-1	1	1
Otu0914	Bacteria(100)-Firmicutes(100)-Clostridia(100)-Clostridiales(100)-Lachnospiraceae(100)-Lactonifactor(100)-	0	0	9.46112e-06	7.4482e-06	0	0		1			1	-1	-1
Otu0929	Bacteria(100)-Firmicutes(100)-Clostridia(100)-Clostridiales(100)-Ruminococcaceae(100)-Oscillibacter(100)-	1.83739e-05	2.02405e-05	0	0	1.00852e-05	8.62378e-06		-1			-1	-1	1
Otu0973	Bacteria(100)-Firmicutes(100)-Clostridia(100)-Clostridiales(100)-Lachnospiraceae(100)-Acetitomaculum(100)-	0.000197373	0.000105407	0	0	0.000221077	0.000139743		-1			-1	1	1
Otu1008	Bacteria(100)-Firmicutes(100)-Clostridia(100)-Clostridiales(100)-Clostridiales_Incertae_Sedis_XII(100)-Guggenheimella(100)-	0.000134247	9.02959e-05	6.13806e-07	1.94102e-06	0.000119488	9.5345e-05		-1			-1	-1	1
Otu1015	Bacteria(100)-Firmicutes(100)-Clostridia(100)-Clostridiales(100)-Lachnospiraceae(100)-Syntrophococcus(100)-	0.000750931	0.000645757	1.1938e-06	3.77513e-06	0.000809332	0.000634707		-1			-1	1	1
Otu1070	Bacteria(100)-Firmicutes(100)-Clostridia(100)-Clostridiales(100)-Lachnospiraceae(100)-Coprococcus(100)-	0.00267995	0.00286759	0.000292901	0.000912279	0.00149002	0.0018478		-1			-1	-1	1
Otu1079	Bacteria(100)-Firmicutes(100)-Clostridia(100)-Clostridiales(100)-Lachnospiraceae(100)-Dorea(100)-	9.08715e-05	6.62003e-05	1.28249e-05	9.54977e-06	0.000105552	0.00010099		-1			-1	1	1
Otu1145	Bacteria(100)-Firmicutes(100)-Clostridia(100)-Clostridiales(100)-Ruminococcaceae(100)-Clostridium_III(100)-	5.11418e-05	5.70227e-05	0	0	5.5467e-06	5.77736e-06		-1			-1	-1	1
Otu1166	Bacteria(100)-Firmicutes(100)-Clostridia(100)-Clostridiales(100)-Lachnospiraceae(100)-Parasporobacterium(100)-	0.000106692	0.000141648	0	0	0.000208865	0.000315717		-1			-1	1	1
Otu1184	Bacteria(100)-Firmicutes(100)-Clostridia(100)-Clostridiales(100)-Ruminococcaceae(100)-Acetivibrio(100)-	4.73703e-05	3.17215e-05	0	0	2.88551e-05	4.56143e-05		-1			-1	-1	1
Comparison Age_18_Age_24	Taxonomy	MeanAge8	StdAge8	MeanAge18	StdAge18	MeanAge24	StdAge24
Otu0005	Bacteria(100)-Firmicutes(100)-Clostridia(100)-Clostridiales(100)-unclassified-unclassified-	0.0156195	0.00825297	0.0106249	0.00256534	0.0174267	0.00399944		1			-1	1	1
Otu0018	Bacteria(100)-Firmicutes(100)-Clostridia(100)-Clostridiales(100)-Ruminococcaceae(100)-Pseudoflavonifractor(62)-	0.00201837	0.00160736	0.00123925	0.000652117	0.00362738	0.00193492		1			-1	1	1
Otu0022	Bacteria(100)-Firmicutes(100)-Clostridia(100)-Clostridiales(100)-Lachnospiraceae(100)-Clostridium_XlVa(81)-	0.00436061	0.00366283	0.00162092	0.000982289	0.00426522	0.00191379		1			-1	-1	1
Otu0055	Bacteria(100)-Firmicutes(100)-Clostridia(100)-Clostridiales(100)-Clostridiales_Incertae_Sedis_XII(100)-Acidaminobacter(100)-	0.00331843	0.00168657	0.00232605	0.000812383	0.00397543	0.00109604		1			-1	1	1
Otu0098	Bacteria(100)-Firmicutes(100)-Clostridia(100)-Clostridiales(100)-Ruminococcaceae(100)-Sporobacter(100)-	0.00108272	0.000756826	0.000718583	0.000280461	0.00165811	0.00111849		1			-1	1	1
Otu0126	Bacteria(100)-Firmicutes(100)-Clostridia(100)-Clostridiales(100)-Lachnospiraceae(100)-Clostridium_XlVa(100)-	9.72893e-05	9.5857e-05	2.07835e-05	1.74589e-05	0.000739076	0.000670665		1			-1	1	1
Otu0128	Bacteria(100)-Bacteroidetes(100)-Bacteroidia(100)-Bacteroidales(100)-Porphyromonadaceae(100)-Barnesiella(100)-	0.00224407	0.0010444	0.00317438	0.00163821	0.00111434	0.000698944		-1			1	-1	-1
Otu0143	Bacteria(100)-Firmicutes(100)-Clostridia(100)-Clostridiales(100)-Lachnospiraceae(100)-unclassified-	9.68023e-05	7.61463e-05	5.79066e-05	4.35895e-05	0.000515851	0.000459673		1			-1	1	1
Otu0177	Bacteria(100)-Firmicutes(100)-Negativicutes(100)-Selenomonadales(100)-Veillonellaceae(100)-Anaerosinus(100)-	0.000362298	0.00036216	6.3448e-05	7.63421e-05	0.00162939	0.00261648		1			-1	1	1
Otu0178	Bacteria(100)-Firmicutes(100)-Clostridia(100)-Clostridiales(100)-Ruminococcaceae(100)-Ruminococcus(100)-	0.00349856	0.00304725	0.00908435	0.00313381	0.00398497	0.000960717		-1			1	1	-1
Otu0207	Bacteria(100)-Firmicutes(100)-Clostridia(100)-Clostridiales(100)-Ruminococcaceae(100)-Hydrogenoanaerobacterium(100)-	0.00215858	0.00277979	0.000990721	0.000702627	0.0051581	0.00340203		1			-1	1	1
Otu0212	Bacteria(100)-Firmicutes(100)-Clostridia(100)-Clostridiales(100)-Ruminococcaceae(100)-Faecalibacterium(100)-	2.72495e-05	2.92724e-05	1.12496e-05	1.37538e-05	6.49204e-05	4.71222e-05		1			-1	1	1
Otu0214	Bacteria(100)-Firmicutes(100)-Clostridia(100)-Clostridiales(100)-Ruminococcaceae(100)-Flavonifractor(57)-	9.39863e-05	0.000108273	1.97843e-05	2.04451e-05	0.000112667	6.57204e-05		1			-1	1	1
Otu0222	Bacteria(100)-Firmicutes(100)-Clostridia(100)-Clostridiales(100)-Ruminococcaceae(100)-Sporobacter(100)-	9.80359e-05	0.000113568	3.3942e-05	2.62188e-05	0.000149098	0.000166287		1			-1	1	1
Otu0229	Bacteria(100)-Firmicutes(100)-Clostridia(100)-Clostridiales(100)-Lachnospiraceae(100)-Lachnospiracea_incertae_sedis(100)-	0.000517905	0.000734107	0	0	0.000541865	0.000709437		1			-1	1	1
Otu0232	Bacteria(100)-Firmicutes(100)-Clostridia(100)-Clostridiales(100)-Lachnospiraceae(100)-Robinsoniella(51)-	0.000625029	0.000881933	0.000420772	0.000335815	0.000120895	5.90549e-05		-1			-1	-1	-1
Otu0245	Bacteria(100)-Firmicutes(100)-Clostridia(100)-Clostridiales(100)-Ruminococcaceae(100)-Oscillibacter(100)-	0.000100611	0.000132857	4.6044e-05	4.77862e-05	0.000166511	0.000104261		1			-1	1	1
Otu0269	Bacteria(100)-Firmicutes(100)-Clostridia(100)-Clostridiales(100)-Ruminococcaceae(100)-Papillibacter(100)-	0.000633146	0.000375356	0.000966222	0.000460822	0.00026181	0.000138808		-1			1	-1	-1
Otu0274	Bacteria(100)-Firmicutes(100)-Clostridia(100)-Clostridiales(100)-Lachnospiraceae(100)-Johnsonella(100)-	2.36212e-05	3.63657e-05	1.02354e-05	1.42509e-05	0.000170063	0.000174728		1			-1	1	1
Otu0299	Bacteria(100)-Firmicutes(100)-Clostridia(100)-Clostridiales(100)-Lachnospiraceae(100)-Clostridium_XlVa(100)-	0.000135252	9.03365e-05	0.000287896	0.000368407	2.2333e-05	2.43203e-05		-1			1	-1	-1
Otu0349	Bacteria(100)-Firmicutes(100)-Clostridia(100)-Clostridiales(100)-Lachnospiraceae(100)-Clostridium_XlVa(100)-	0.000264769	0.000241148	3.28693e-05	3.6776e-05	0.000313978	0.000228012		1			-1	1	1
Otu0354	Bacteria(100)-Firmicutes(100)-Clostridia(100)-Clostridiales(100)-Lachnospiraceae(100)-Acetitomaculum(100)-	0.000102009	0.000100284	0	0	0.000111261	8.67133e-05		1			-1	1	1
Otu0371	Bacteria(100)-Proteobacteria(100)-Alphaproteobacteria(100)-Rhizobiales(100)-Hyphomicrobiaceae(100)-Gemmiger(100)-	5.74183e-05	0.000109879	3.271e-05	5.14112e-05	0.000240289	0.000296218		1			-1	1	1
Otu0408	Bacteria(100)-Bacteroidetes(100)-Bacteroidia(100)-Bacteroidales(100)-Porphyromonadaceae(100)-Barnesiella(100)-	0.000404683	0.000378734	0.000988844	0.000391136	0.000378468	0.000152741		-1			1	-1	-1
Otu0423	Bacteria(100)-Firmicutes(100)-Clostridia(100)-Clostridiales(100)-Clostridiaceae_1(100)-Anaerosporobacter(100)-	6.16233e-05	7.87379e-05	8.13168e-06	2.57146e-05	5.03164e-05	4.91746e-05		1			-1	-1	1
Otu0426	Bacteria(100)-Firmicutes(100)-Clostridia(100)-Clostridiales(100)-Ruminococcaceae(100)-Pseudoflavonifractor(100)-	0.000142159	0.000176614	5.78951e-05	3.61608e-05	0.000192578	6.27853e-05		1			-1	1	1
Otu0435	Bacteria(100)-Firmicutes(100)-Clostridia(100)-Clostridiales(100)-Lachnospiraceae(100)-Clostridium_XlVa(100)-	9.23422e-05	0.00018692	1.7431e-05	4.19323e-05	0.000272383	0.000358982		1			-1	1	1
Otu0482	Bacteria(100)-Firmicutes(100)-Clostridia(100)-Clostridiales(100)-Lachnospiraceae(100)-Lachnobacterium(53)-	0.00166304	0.00176299	0.000176942	0.000369745	0.000511224	0.000374432		1			-1	-1	1
Otu0486	Bacteria(100)-Firmicutes(100)-Clostridia(100)-Clostridiales(100)-Ruminococcaceae(100)-Ruminococcus(100)-	0.00212627	0.00382919	0	0	0.00196003	0.002788		1			-1	-1	1
Otu0496	Bacteria(100)-Firmicutes(100)-Clostridia(100)-Clostridiales(100)-Lachnospiraceae(100)-Dorea(100)-	0.000262177	0.000291711	1.0152e-05	1.45744e-05	0.000150394	0.000154251		1			-1	-1	1
Otu0499	Bacteria(100)-Firmicutes(100)-Clostridia(100)-Clostridiales(100)-Lachnospiraceae(100)-Lachnospiracea_incertae_sedis(100)-	4.06919e-05	4.89402e-05	0	0	0.000425002	0.000621619		1			-1	1	1
Otu0502	Bacteria(100)-Firmicutes(100)-Clostridia(100)-Clostridiales(100)-Lachnospiraceae(100)-Lactonifactor(100)-	0.000319987	0.000196919	0.000732496	0.000404722	0.000202852	0.000141575		-1			1	-1	-1
Otu0513	Bacteria(100)-Tenericutes(100)-Mollicutes(100)-Anaeroplasmatales(100)-Anaeroplasmataceae(100)-Anaeroplasma(100)-	0.000500696	0.000978121	0.000133216	0.000216332	0.000588403	0.00030885		1			-1	1	1
Otu0538	Bacteria(100)-Firmicutes(100)-Clostridia(100)-Clostridiales(100)-Lachnospiraceae(100)-Marvinbryantia(100)-	0.00312272	0.00532787	0.000187653	0.000369824	0.00198151	0.00170526		1			-1	-1	1
Otu0550	Bacteria(100)-Elusimicrobia(100)-Elusimicrobia(100)-Elusimicrobiales(100)-Elusimicrobiaceae(100)-Elusimicrobium(100)-	0.000806825	0.000748871	0.000100725	0.000188049	0.000496442	0.000367073		1			-1	-1	1
Otu0558	Bacteria(100)-Firmicutes(100)-Clostridia(100)-Clostridiales(100)-Lachnospiraceae(100)-Clostridium_XlVa(100)-	0.000667386	0.00114413	0.000204481	0.000509415	0.00127701	0.00113747		1			-1	1	1
Otu0570	Bacteria(100)-Firmicutes(100)-Clostridia(100)-Clostridiales(100)-Ruminococcaceae(100)-Clostridium_IV(100)-	0.000129371	0.000111736	0	0	6.46039e-05	9.47869e-05		1			-1	-1	1
Otu0575	Bacteria(100)-Firmicutes(100)-Clostridia(100)-Clostridiales(100)-Lachnospiraceae(100)-Butyrivibrio(100)-	7.54891e-06	1.41818e-05	2.88464e-05	3.3519e-05	9.96351e-07	2.98905e-06		-1			1	-1	-1
Otu0599	Bacteria(100)-Firmicutes(100)-Clostridia(100)-Clostridiales(100)-Lachnospiraceae(100)-Clostridium_XlVa(100)-	9.46147e-05	5.40249e-05	5.37941e-05	0.000125905	0.0003278	0.00032086		1			-1	1	1
Otu0616	Bacteria(100)-Firmicutes(100)-Clostridia(100)-Clostridiales(100)-Lachnospiraceae(100)-Lactonifactor(100)-	0.000552205	0.00106977	9.9455e-05	0.000113783	0.000924927	0.0012439		1			-1	1	1
Otu0630	Bacteria(100)-Firmicutes(100)-Clostridia(100)-Clostridiales(100)-Lachnospiraceae(100)-Clostridium_XlVb(100)-	0.000351373	0.000690118	0	0	0.000283747	0.000318273		1			-1	-1	1
Otu0648	Bacteria(100)-Firmicutes(100)-Clostridia(100)-Clostridiales(100)-Lachnospiraceae(100)-Clostridium_XlVa(100)-	4.03533e-05	6.14725e-05	1.57182e-06	3.41155e-06	4.41626e-05	3.77176e-05		1			-1	1	1
Otu0649	Bacteria(100)-Firmicutes(100)-Clostridia(100)-Clostridiales(100)-Ruminococcaceae(100)-Acetivibrio(100)-	0.000316296	0.000666442	0	0	0.00015852	0.000298677		1			-1	-1	1
Otu0705	Bacteria(100)-Proteobacteria(100)-Alphaproteobacteria(100)-Rhodospirillales(100)-Rhodospirillaceae(100)-Dongia(100)-	2.52784e-05	5.17225e-05	0	0	6.6884e-05	7.33181e-05		1			-1	1	1
Otu0725	Bacteria(100)-Firmicutes(100)-Clostridia(100)-Clostridiales(100)-Lachnospiraceae(100)-Butyrivibrio(100)-	0.000118263	0.000125941	0.000287976	0.000294112	9.60383e-05	5.38072e-05		-1			1	-1	-1
Otu0726	Bacteria(100)-Firmicutes(100)-Clostridia(100)-Clostridiales(100)-Ruminococcaceae(100)-Clostridium_III(100)-	3.6457e-05	3.22454e-05	0	0	4.34523e-05	3.68112e-05		1			-1	1	1
Otu0730	Bacteria(100)-Firmicutes(100)-Clostridia(100)-Clostridiales(100)-Ruminococcaceae(100)-Anaerofilum(100)-	0.000111853	0.000120641	1.72131e-05	3.18269e-05	0.000131181	6.9815e-05		1			-1	1	1
Otu0733	Bacteria(100)-Firmicutes(100)-Clostridia(100)-Clostridiales(100)-Lachnospiraceae(100)-Parasporobacterium(100)-	8.10258e-05	0.000158577	0	0	0.000122567	0.000120471		1			-1	1	1
Otu0761	Bacteria(100)-Firmicutes(100)-Clostridia(100)-Clostridiales(100)-Lachnospiraceae(100)-Anaerostipes(100)-	0.00115497	0.00150773	0.00134333	0.0017114	7.58411e-05	9.36038e-05		-1			1	-1	-1
Otu0782	Bacteria(100)-Firmicutes(100)-Clostridia(100)-Clostridiales(100)-Lachnospiraceae(100)-Acetitomaculum(100)-	9.88527e-05	0.000115116	0	0	8.4066e-05	8.0896e-05		1			-1	-1	1
Otu0809	Bacteria(100)-Firmicutes(100)-Clostridia(100)-Clostridiales(100)-Lachnospiraceae(100)-Lachnobacterium(100)-	0.000146076	0.000270574	0	0	0.000391833	0.000350352		1			-1	1	1
Otu0834	Bacteria(100)-Firmicutes(100)-Clostridia(100)-Clostridiales(100)-Lachnospiraceae(100)-Coprococcus(100)-	3.22732e-05	4.62918e-05	0	0	0.000627092	0.000679877		1			-1	1	1
Otu0874	Bacteria(100)-Firmicutes(100)-Clostridia(100)-Clostridiales(100)-Ruminococcaceae(100)-Clostridium_III(100)-	3.30323e-05	3.00161e-05	0	0	2.69167e-05	2.92375e-05		1			-1	-1	1
Otu0875	Bacteria(100)-Bacteroidetes(100)-Bacteroidia(100)-Bacteroidales(100)-Porphyromonadaceae(100)-Barnesiella(100)-	0.000921211	0.00040911	0.00112062	0.000332253	0.000436435	0.000255358		-1			1	-1	-1
Otu0892	Bacteria(100)-Firmicutes(100)-Clostridia(100)-Clostridiales(100)-Clostridiales_Incertae_Sedis_XIII(100)-Anaerovorax(100)-	0.000189025	0.000205366	0	0	0.000248343	0.0002708		1			-1	1	1
Otu0907	Bacteria(100)-Firmicutes(100)-Clostridia(100)-Clostridiales(100)-Ruminococcaceae(100)-Flavonifractor(100)-	5.97447e-05	4.7198e-05	1.63249e-06	3.57145e-06	6.50104e-05	5.79691e-05		1			-1	1	1
Otu0914	Bacteria(100)-Firmicutes(100)-Clostridia(100)-Clostridiales(100)-Lachnospiraceae(100)-Lactonifactor(100)-	0	0	9.46112e-06	7.4482e-06	0	0		-1			1	-1	-1
Otu0922	Bacteria(100)-Firmicutes(100)-Clostridia(100)-Clostridiales(100)-Ruminococcaceae(100)-Sporobacter(100)-	0.00103972	0.000994285	0.00115656	0.000373253	0.000490266	0.000289993		-1			1	-1	-1
Otu0937	Bacteria(100)-Firmicutes(100)-Clostridia(100)-Clostridiales(100)-Ruminococcaceae(100)-Clostridium_III(100)-	7.94169e-06	1.67599e-05	2.523e-05	1.16902e-05	1.05472e-06	3.16415e-06		-1			1	-1	-1
Otu0954	Bacteria(100)-Proteobacteria(100)-Betaproteobacteria(100)-Burkholderiales(100)-Sutterellaceae(100)-Sutterella(100)-	0	0	0	0	0.000360693	0.000416361		1			-1	1	1
Otu0959	Bacteria(100)-Actinobacteria(100)-Actinobacteria(100)-Coriobacteriales(100)-Coriobacteriaceae(100)-Adlercreutzia(100)-	1.3025e-05	1.24046e-05	1.65038e-05	1.03974e-05	4.25489e-06	7.22133e-06		-1			1	-1	-1
Otu0962	Bacteria(100)-Firmicutes(100)-Clostridia(100)-Clostridiales(100)-Ruminococcaceae(100)-Clostridium_IV(100)-	4.01719e-05	1.77592e-05	3.49146e-05	3.25137e-05	0.00010459	4.43064e-05		1			-1	1	1
Otu0973	Bacteria(100)-Firmicutes(100)-Clostridia(100)-Clostridiales(100)-Lachnospiraceae(100)-Acetitomaculum(100)-	0.000197373	0.000105407	0	0	0.000221077	0.000139743		1			-1	1	1
Otu0979	Bacteria(100)-Firmicutes(100)-Clostridia(100)-Clostridiales(100)-Ruminococcaceae(100)-Butyricicoccus(100)-	7.30352e-06	1.41211e-05	0	0	7.34446e-05	6.2569e-05		1			-1	1	1
Otu1004	Bacteria(100)-Elusimicrobia(100)-Elusimicrobia(100)-Elusimicrobiales(100)-Elusimicrobiaceae(100)-Elusimicrobium(100)-	0.00148518	0.0012758	0.000518096	0.000417418	0.00156874	0.000980286		1			-1	1	1
Otu1008	Bacteria(100)-Firmicutes(100)-Clostridia(100)-Clostridiales(100)-Clostridiales_Incertae_Sedis_XII(100)-Guggenheimella(100)-	0.000134247	9.02959e-05	6.13806e-07	1.94102e-06	0.000119488	9.5345e-05		1			-1	-1	1
Otu1015	Bacteria(100)-Firmicutes(100)-Clostridia(100)-Clostridiales(100)-Lachnospiraceae(100)-Syntrophococcus(100)-	0.000750931	0.000645757	1.1938e-06	3.77513e-06	0.000809332	0.000634707		1			-1	1	1
Otu1039	Bacteria(100)-Firmicutes(100)-Clostridia(100)-Clostridiales(100)-Ruminococcaceae(100)-Hydrogenoanaerobacterium(100)-	0.000295641	0.000207224	0.000135215	7.41745e-05	0.000339438	0.00011242		1			-1	1	1
Otu1081	Bacteria(100)-Actinobacteria(100)-Actinobacteria(100)-Coriobacteriales(100)-Coriobacteriaceae(100)-Olsenella(100)-	1.29658e-05	1.68433e-05	5.07586e-05	3.50066e-05	7.53426e-06	1.64467e-05		-1			1	-1	-1
Otu1094	Bacteria(100)-Firmicutes(100)-Clostridia(100)-Clostridiales(100)-Lachnospiraceae(100)-Syntrophococcus(100)-	1.50201e-05	3.15458e-05	2.21248e-06	4.68255e-06	0.000327539	0.000806998		1			-1	1	1
Otu1102	Bacteria(100)-Firmicutes(100)-Clostridia(100)-Clostridiales(100)-Gracilibacteraceae(100)-Lutispora(100)-	8.72957e-05	6.83949e-05	0.000180573	0.000125054	2.72593e-05	2.59883e-05		-1			1	-1	-1
Otu1104	Bacteria(100)-Proteobacteria(100)-Alphaproteobacteria(100)-Rhodospirillales(100)-Rhodospirillaceae(100)-Insolitispirillum(100)-	4.63345e-05	0.000119898	6.86417e-06	7.83066e-06	5.6337e-05	5.66259e-05		1			-1	1	1
Otu1106	Bacteria(100)-Bacteroidetes(100)-Bacteroidia(100)-Bacteroidales(100)-Porphyromonadaceae(100)-Tannerella(100)-	4.99982e-05	4.99304e-05	0	0	7.27145e-05	5.68675e-05		1			-1	1	1
Otu1130	Bacteria(100)-Actinobacteria(100)-Actinobacteria(100)-Coriobacteriales(100)-Coriobacteriaceae(100)-Gordonibacter(100)-	0.000220173	0.000103452	0.000113419	6.15647e-05	0.00024256	9.88199e-05		1			-1	1	1
Otu1133	Bacteria(100)-Firmicutes(100)-Clostridia(100)-Clostridiales(100)-Ruminococcaceae(100)-Oscillibacter(100)-	6.55438e-06	1.1856e-05	0	0	2.75392e-05	2.35291e-05		1			-1	1	1
Otu1134	Bacteria(100)-Firmicutes(100)-Clostridia(100)-Clostridiales(100)-Ruminococcaceae(100)-Ruminococcus(100)-	0.00767584	0.0126575	3.58141e-06	1.13254e-05	0.0123767	0.0125973		1			-1	1	1
Otu1137	Bacteria(100)-Firmicutes(100)-Clostridia(100)-Clostridiales(100)-Ruminococcaceae(100)-Papillibacter(100)-	3.50185e-05	3.53959e-05	3.58793e-05	2.89893e-05	0.000106366	4.60904e-05		1			1	1	1
Otu1148	Bacteria(100)-Firmicutes(100)-Clostridia(100)-Clostridiales(100)-Ruminococcaceae(100)-Pseudoflavonifractor(100)-	2.1534e-05	2.64175e-05	1.91334e-06	6.0505e-06	3.20949e-05	2.20604e-05		1			-1	1	1
Otu1166	Bacteria(100)-Firmicutes(100)-Clostridia(100)-Clostridiales(100)-Lachnospiraceae(100)-Parasporobacterium(100)-	0.000106692	0.000141648	0	0	0.000208865	0.000315717		1			-1	1	1
Otu1180	Bacteria(100)-Proteobacteria(100)-Deltaproteobacteria(100)-Bdellovibrionales(100)-Bdellovibrionaceae(100)-Vampirovibrio(100)-	0.000835435	0.00113089	0.000461915	0.000256086	0.00208217	0.0012913		1			-1	1	1
Comparison Age_8_Age_24	Taxonomy	MeanAge8	StdAge8	MeanAge18	StdAge18	MeanAge24	StdAge24
Otu0420	Bacteria(100)-Firmicutes(100)-Clostridia(100)-Clostridiales(100)-Lachnospiraceae(100)-Clostridium_XlVb(100)-	4.15567e-05	1.92101e-05	7.02038e-05	5.17841e-05	0.000116783	4.07455e-05		1			1	1	1

## Sheet: OverallCompilationSigDiffOTUs
Comparison Age_8_Age_18	Taxonomy	MeanAge8	StdAge8	MeanAge18	StdAge18	MeanAge24	StdAge24	INCREASE WITH AGE	A8-A18	A8-A24	A18-A24
Otu0134	Bacteria(100)-Firmicutes(100)-Clostridia(100)-Clostridiales(100)-Lachnospiraceae(100)-Syntrophococcus(91)-	0.000212939	8.7691e-05	0.000511794	0.000432545	0.000253438	0.000111595	1	1	0	0
Otu0177	Bacteria(100)-Firmicutes(100)-Negativicutes(100)-Selenomonadales(100)-Veillonellaceae(100)-Anaerosinus(100)-	0.000362298	0.00036216	6.3448e-05	7.63421e-05	0.00162939	0.00261648	-1	-1	0	1
Otu0229	Bacteria(100)-Firmicutes(100)-Clostridia(100)-Clostridiales(100)-Lachnospiraceae(100)-Lachnospiracea_incertae_sedis(100)-	0.000517905	0.000734107	0	0	0.000541865	0.000709437	-1	-1	0	1
Otu0319	Bacteria(100)-Firmicutes(100)-Clostridia(100)-Clostridiales(100)-Ruminococcaceae(100)-Ruminococcus(100)-	0.000194545	0.000158457	0.00391	0.00480013	0.00205057	0.00265604	1	1	0	0
Otu0354	Bacteria(100)-Firmicutes(100)-Clostridia(100)-Clostridiales(100)-Lachnospiraceae(100)-Acetitomaculum(100)-	0.000102009	0.000100284	0	0	0.000111261	8.67133e-05	-1	-1	0	1
Otu0496	Bacteria(100)-Firmicutes(100)-Clostridia(100)-Clostridiales(100)-Lachnospiraceae(100)-Dorea(100)-	0.000262177	0.000291711	1.0152e-05	1.45744e-05	0.000150394	0.000154251	-1	-1	0	1
Otu0499	Bacteria(100)-Firmicutes(100)-Clostridia(100)-Clostridiales(100)-Lachnospiraceae(100)-Lachnospiracea_incertae_sedis(100)-	4.06919e-05	4.89402e-05	0	0	0.000425002	0.000621619	-1	-1	0	1
Otu0550	Bacteria(100)-Elusimicrobia(100)-Elusimicrobia(100)-Elusimicrobiales(100)-Elusimicrobiaceae(100)-Elusimicrobium(100)-	0.000806825	0.000748871	0.000100725	0.000188049	0.000496442	0.000367073	-1	-1	0	1
Otu0557	Bacteria(100)-Firmicutes(100)-Clostridia(100)-Clostridiales(100)-Ruminococcaceae(100)-Clostridium_IV(100)-	0	0	0.000748219	0.000650186	0.00031107	0.000305802	1	1	0	0
Otu0560	Bacteria(100)-Firmicutes(100)-Clostridia(100)-Clostridiales(100)-Clostridiaceae_4(100)-Thermotalea(92)-	1.96553e-06	4.21717e-06	9.99614e-05	6.78959e-05	1.19882e-05	1.8223e-05	1	1	0	0
Otu0570	Bacteria(100)-Firmicutes(100)-Clostridia(100)-Clostridiales(100)-Ruminococcaceae(100)-Clostridium_IV(100)-	0.000129371	0.000111736	0	0	6.46039e-05	9.47869e-05	-1	-1	0	1
Otu0595	Bacteria(100)-Firmicutes(100)-Clostridia(100)-Clostridiales(100)-Lachnospiraceae(100)-Acetitomaculum(100)-	0.000167201	0.000159753	0	0	6.19913e-05	9.88323e-05	-1	-1	0	0
Otu0630	Bacteria(100)-Firmicutes(100)-Clostridia(100)-Clostridiales(100)-Lachnospiraceae(100)-Clostridium_XlVb(100)-	0.000351373	0.000690118	0	0	0.000283747	0.000318273	-1	-1	0	1
Otu0638	Bacteria(100)-Proteobacteria(100)-Alphaproteobacteria(100)-Rickettsiales(100)-Rickettsiaceae(100)-Orientia(100)-	5.53794e-05	2.9482e-05	0	0	1.42774e-05	2.99475e-05	-1	-1	0	0
Otu0728	Bacteria(100)-Firmicutes(100)-Clostridia(100)-Clostridiales(100)-Lachnospiraceae(100)-Lachnospiracea_incertae_sedis(100)-	0.000130261	0.00012117	0	0	1.49894e-05	1.51506e-05	-1	-1	0	0
Otu0782	Bacteria(100)-Firmicutes(100)-Clostridia(100)-Clostridiales(100)-Lachnospiraceae(100)-Acetitomaculum(100)-	9.88527e-05	0.000115116	0	0	8.4066e-05	8.0896e-05	-1	-1	0	1
Otu0809	Bacteria(100)-Firmicutes(100)-Clostridia(100)-Clostridiales(100)-Lachnospiraceae(100)-Lachnobacterium(100)-	0.000146076	0.000270574	0	0	0.000391833	0.000350352	-1	-1	0	1
Otu0829	Bacteria(100)-Firmicutes(100)-Clostridia(100)-Clostridiales(100)-Lachnospiraceae(100)-Roseburia(100)-	4.73903e-05	5.43349e-05	0	0	3.7405e-05	4.52688e-05	-1	-1	0	0
Otu0874	Bacteria(100)-Firmicutes(100)-Clostridia(100)-Clostridiales(100)-Ruminococcaceae(100)-Clostridium_III(100)-	3.30323e-05	3.00161e-05	0	0	2.69167e-05	2.92375e-05	-1	-1	0	1
Otu0892	Bacteria(100)-Firmicutes(100)-Clostridia(100)-Clostridiales(100)-Clostridiales_Incertae_Sedis_XIII(100)-Anaerovorax(100)-	0.000189025	0.000205366	0	0	0.000248343	0.0002708	-1	-1	0	1
Otu0914	Bacteria(100)-Firmicutes(100)-Clostridia(100)-Clostridiales(100)-Lachnospiraceae(100)-Lactonifactor(100)-	0	0	9.46112e-06	7.4482e-06	0	0	1	1	0	-1
Otu0929	Bacteria(100)-Firmicutes(100)-Clostridia(100)-Clostridiales(100)-Ruminococcaceae(100)-Oscillibacter(100)-	1.83739e-05	2.02405e-05	0	0	1.00852e-05	8.62378e-06	-1	-1	0	0
Otu0973	Bacteria(100)-Firmicutes(100)-Clostridia(100)-Clostridiales(100)-Lachnospiraceae(100)-Acetitomaculum(100)-	0.000197373	0.000105407	0	0	0.000221077	0.000139743	-1	-1	0	1
Otu1008	Bacteria(100)-Firmicutes(100)-Clostridia(100)-Clostridiales(100)-Clostridiales_Incertae_Sedis_XII(100)-Guggenheimella(100)-	0.000134247	9.02959e-05	6.13806e-07	1.94102e-06	0.000119488	9.5345e-05	-1	-1	0	1
Otu1015	Bacteria(100)-Firmicutes(100)-Clostridia(100)-Clostridiales(100)-Lachnospiraceae(100)-Syntrophococcus(100)-	0.000750931	0.000645757	1.1938e-06	3.77513e-06	0.000809332	0.000634707	-1	-1	0	1
Otu1070	Bacteria(100)-Firmicutes(100)-Clostridia(100)-Clostridiales(100)-Lachnospiraceae(100)-Coprococcus(100)-	0.00267995	0.00286759	0.000292901	0.000912279	0.00149002	0.0018478	-1	-1	0	0
Otu1079	Bacteria(100)-Firmicutes(100)-Clostridia(100)-Clostridiales(100)-Lachnospiraceae(100)-Dorea(100)-	9.08715e-05	6.62003e-05	1.28249e-05	9.54977e-06	0.000105552	0.00010099	-1	-1	0	0
Otu1145	Bacteria(100)-Firmicutes(100)-Clostridia(100)-Clostridiales(100)-Ruminococcaceae(100)-Clostridium_III(100)-	5.11418e-05	5.70227e-05	0	0	5.5467e-06	5.77736e-06	-1	-1	0	0
Otu1166	Bacteria(100)-Firmicutes(100)-Clostridia(100)-Clostridiales(100)-Lachnospiraceae(100)-Parasporobacterium(100)-	0.000106692	0.000141648	0	0	0.000208865	0.000315717	-1	-1	0	1
Otu1184	Bacteria(100)-Firmicutes(100)-Clostridia(100)-Clostridiales(100)-Ruminococcaceae(100)-Acetivibrio(100)-	4.73703e-05	3.17215e-05	0	0	2.88551e-05	4.56143e-05	-1	-1	0	1
Otu0420	Bacteria(100)-Firmicutes(100)-Clostridia(100)-Clostridiales(100)-Lachnospiraceae(100)-Clostridium_XlVb(100)-	4.15567e-05	1.92101e-05	7.02038e-05	5.17841e-05	0.000116783	4.07455e-05	1	0	1	0
Otu0005	Bacteria(100)-Firmicutes(100)-Clostridia(100)-Clostridiales(100)-unclassified-unclassified-	0.0156195	0.00825297	0.0106249	0.00256534	0.0174267	0.00399944	1	0	0	1
Otu0018	Bacteria(100)-Firmicutes(100)-Clostridia(100)-Clostridiales(100)-Ruminococcaceae(100)-Pseudoflavonifractor(62)-	0.00201837	0.00160736	0.00123925	0.000652117	0.00362738	0.00193492	1	0	0	1
Otu0022	Bacteria(100)-Firmicutes(100)-Clostridia(100)-Clostridiales(100)-Lachnospiraceae(100)-Clostridium_XlVa(81)-	0.00436061	0.00366283	0.00162092	0.000982289	0.00426522	0.00191379	1	0	0	1
Otu0055	Bacteria(100)-Firmicutes(100)-Clostridia(100)-Clostridiales(100)-Clostridiales_Incertae_Sedis_XII(100)-Acidaminobacter(100)-	0.00331843	0.00168657	0.00232605	0.000812383	0.00397543	0.00109604	1	0	0	1
Otu0098	Bacteria(100)-Firmicutes(100)-Clostridia(100)-Clostridiales(100)-Ruminococcaceae(100)-Sporobacter(100)-	0.00108272	0.000756826	0.000718583	0.000280461	0.00165811	0.00111849	1	0	0	1
Otu0126	Bacteria(100)-Firmicutes(100)-Clostridia(100)-Clostridiales(100)-Lachnospiraceae(100)-Clostridium_XlVa(100)-	9.72893e-05	9.5857e-05	2.07835e-05	1.74589e-05	0.000739076	0.000670665	1	0	0	1
Otu0128	Bacteria(100)-Bacteroidetes(100)-Bacteroidia(100)-Bacteroidales(100)-Porphyromonadaceae(100)-Barnesiella(100)-	0.00224407	0.0010444	0.00317438	0.00163821	0.00111434	0.000698944	-1	0	0	-1
Otu0143	Bacteria(100)-Firmicutes(100)-Clostridia(100)-Clostridiales(100)-Lachnospiraceae(100)-unclassified-	9.68023e-05	7.61463e-05	5.79066e-05	4.35895e-05	0.000515851	0.000459673	1	0	0	1
Otu0178	Bacteria(100)-Firmicutes(100)-Clostridia(100)-Clostridiales(100)-Ruminococcaceae(100)-Ruminococcus(100)-	0.00349856	0.00304725	0.00908435	0.00313381	0.00398497	0.000960717	-1	0	0	-1
Otu0207	Bacteria(100)-Firmicutes(100)-Clostridia(100)-Clostridiales(100)-Ruminococcaceae(100)-Hydrogenoanaerobacterium(100)-	0.00215858	0.00277979	0.000990721	0.000702627	0.0051581	0.00340203	1	0	0	1
Otu0212	Bacteria(100)-Firmicutes(100)-Clostridia(100)-Clostridiales(100)-Ruminococcaceae(100)-Faecalibacterium(100)-	2.72495e-05	2.92724e-05	1.12496e-05	1.37538e-05	6.49204e-05	4.71222e-05	1	0	0	1
Otu0214	Bacteria(100)-Firmicutes(100)-Clostridia(100)-Clostridiales(100)-Ruminococcaceae(100)-Flavonifractor(57)-	9.39863e-05	0.000108273	1.97843e-05	2.04451e-05	0.000112667	6.57204e-05	1	0	0	1
Otu0222	Bacteria(100)-Firmicutes(100)-Clostridia(100)-Clostridiales(100)-Ruminococcaceae(100)-Sporobacter(100)-	9.80359e-05	0.000113568	3.3942e-05	2.62188e-05	0.000149098	0.000166287	1	0	0	1
Otu0232	Bacteria(100)-Firmicutes(100)-Clostridia(100)-Clostridiales(100)-Lachnospiraceae(100)-Robinsoniella(51)-	0.000625029	0.000881933	0.000420772	0.000335815	0.000120895	5.90549e-05	-1	0	0	-1
Otu0245	Bacteria(100)-Firmicutes(100)-Clostridia(100)-Clostridiales(100)-Ruminococcaceae(100)-Oscillibacter(100)-	0.000100611	0.000132857	4.6044e-05	4.77862e-05	0.000166511	0.000104261	1	0	0	1
Otu0269	Bacteria(100)-Firmicutes(100)-Clostridia(100)-Clostridiales(100)-Ruminococcaceae(100)-Papillibacter(100)-	0.000633146	0.000375356	0.000966222	0.000460822	0.00026181	0.000138808	-1	0	0	-1
Otu0274	Bacteria(100)-Firmicutes(100)-Clostridia(100)-Clostridiales(100)-Lachnospiraceae(100)-Johnsonella(100)-	2.36212e-05	3.63657e-05	1.02354e-05	1.42509e-05	0.000170063	0.000174728	1	0	0	1
Otu0299	Bacteria(100)-Firmicutes(100)-Clostridia(100)-Clostridiales(100)-Lachnospiraceae(100)-Clostridium_XlVa(100)-	0.000135252	9.03365e-05	0.000287896	0.000368407	2.2333e-05	2.43203e-05	-1	0	0	-1
Otu0349	Bacteria(100)-Firmicutes(100)-Clostridia(100)-Clostridiales(100)-Lachnospiraceae(100)-Clostridium_XlVa(100)-	0.000264769	0.000241148	3.28693e-05	3.6776e-05	0.000313978	0.000228012	1	0	0	1
Otu0371	Bacteria(100)-Proteobacteria(100)-Alphaproteobacteria(100)-Rhizobiales(100)-Hyphomicrobiaceae(100)-Gemmiger(100)-	5.74183e-05	0.000109879	3.271e-05	5.14112e-05	0.000240289	0.000296218	1	0	0	1
Otu0408	Bacteria(100)-Bacteroidetes(100)-Bacteroidia(100)-Bacteroidales(100)-Porphyromonadaceae(100)-Barnesiella(100)-	0.000404683	0.000378734	0.000988844	0.000391136	0.000378468	0.000152741	-1	0	0	-1
Otu0423	Bacteria(100)-Firmicutes(100)-Clostridia(100)-Clostridiales(100)-Clostridiaceae_1(100)-Anaerosporobacter(100)-	6.16233e-05	7.87379e-05	8.13168e-06	2.57146e-05	5.03164e-05	4.91746e-05	1	0	0	1
Otu0426	Bacteria(100)-Firmicutes(100)-Clostridia(100)-Clostridiales(100)-Ruminococcaceae(100)-Pseudoflavonifractor(100)-	0.000142159	0.000176614	5.78951e-05	3.61608e-05	0.000192578	6.27853e-05	1	0	0	1
Otu0435	Bacteria(100)-Firmicutes(100)-Clostridia(100)-Clostridiales(100)-Lachnospiraceae(100)-Clostridium_XlVa(100)-	9.23422e-05	0.00018692	1.7431e-05	4.19323e-05	0.000272383	0.000358982	1	0	0	1
Otu0482	Bacteria(100)-Firmicutes(100)-Clostridia(100)-Clostridiales(100)-Lachnospiraceae(100)-Lachnobacterium(53)-	0.00166304	0.00176299	0.000176942	0.000369745	0.000511224	0.000374432	1	0	0	1
Otu0486	Bacteria(100)-Firmicutes(100)-Clostridia(100)-Clostridiales(100)-Ruminococcaceae(100)-Ruminococcus(100)-	0.00212627	0.00382919	0	0	0.00196003	0.002788	1	0	0	1
Otu0502	Bacteria(100)-Firmicutes(100)-Clostridia(100)-Clostridiales(100)-Lachnospiraceae(100)-Lactonifactor(100)-	0.000319987	0.000196919	0.000732496	0.000404722	0.000202852	0.000141575	-1	0	0	-1
Otu0513	Bacteria(100)-Tenericutes(100)-Mollicutes(100)-Anaeroplasmatales(100)-Anaeroplasmataceae(100)-Anaeroplasma(100)-	0.000500696	0.000978121	0.000133216	0.000216332	0.000588403	0.00030885	1	0	0	1
Otu0538	Bacteria(100)-Firmicutes(100)-Clostridia(100)-Clostridiales(100)-Lachnospiraceae(100)-Marvinbryantia(100)-	0.00312272	0.00532787	0.000187653	0.000369824	0.00198151	0.00170526	1	0	0	1
Otu0558	Bacteria(100)-Firmicutes(100)-Clostridia(100)-Clostridiales(100)-Lachnospiraceae(100)-Clostridium_XlVa(100)-	0.000667386	0.00114413	0.000204481	0.000509415	0.00127701	0.00113747	1	0	0	1
Otu0575	Bacteria(100)-Firmicutes(100)-Clostridia(100)-Clostridiales(100)-Lachnospiraceae(100)-Butyrivibrio(100)-	7.54891e-06	1.41818e-05	2.88464e-05	3.3519e-05	9.96351e-07	2.98905e-06	-1	0	0	-1
Otu0599	Bacteria(100)-Firmicutes(100)-Clostridia(100)-Clostridiales(100)-Lachnospiraceae(100)-Clostridium_XlVa(100)-	9.46147e-05	5.40249e-05	5.37941e-05	0.000125905	0.0003278	0.00032086	1	0	0	1
Otu0616	Bacteria(100)-Firmicutes(100)-Clostridia(100)-Clostridiales(100)-Lachnospiraceae(100)-Lactonifactor(100)-	0.000552205	0.00106977	9.9455e-05	0.000113783	0.000924927	0.0012439	1	0	0	1
Otu0648	Bacteria(100)-Firmicutes(100)-Clostridia(100)-Clostridiales(100)-Lachnospiraceae(100)-Clostridium_XlVa(100)-	4.03533e-05	6.14725e-05	1.57182e-06	3.41155e-06	4.41626e-05	3.77176e-05	1	0	0	1
Otu0649	Bacteria(100)-Firmicutes(100)-Clostridia(100)-Clostridiales(100)-Ruminococcaceae(100)-Acetivibrio(100)-	0.000316296	0.000666442	0	0	0.00015852	0.000298677	1	0	0	1
Otu0705	Bacteria(100)-Proteobacteria(100)-Alphaproteobacteria(100)-Rhodospirillales(100)-Rhodospirillaceae(100)-Dongia(100)-	2.52784e-05	5.17225e-05	0	0	6.6884e-05	7.33181e-05	1	0	0	1
Otu0725	Bacteria(100)-Firmicutes(100)-Clostridia(100)-Clostridiales(100)-Lachnospiraceae(100)-Butyrivibrio(100)-	0.000118263	0.000125941	0.000287976	0.000294112	9.60383e-05	5.38072e-05	-1	0	0	-1
Otu0726	Bacteria(100)-Firmicutes(100)-Clostridia(100)-Clostridiales(100)-Ruminococcaceae(100)-Clostridium_III(100)-	3.6457e-05	3.22454e-05	0	0	4.34523e-05	3.68112e-05	1	0	0	1
Otu0730	Bacteria(100)-Firmicutes(100)-Clostridia(100)-Clostridiales(100)-Ruminococcaceae(100)-Anaerofilum(100)-	0.000111853	0.000120641	1.72131e-05	3.18269e-05	0.000131181	6.9815e-05	1	0	0	1
Otu0733	Bacteria(100)-Firmicutes(100)-Clostridia(100)-Clostridiales(100)-Lachnospiraceae(100)-Parasporobacterium(100)-	8.10258e-05	0.000158577	0	0	0.000122567	0.000120471	1	0	0	1
Otu0761	Bacteria(100)-Firmicutes(100)-Clostridia(100)-Clostridiales(100)-Lachnospiraceae(100)-Anaerostipes(100)-	0.00115497	0.00150773	0.00134333	0.0017114	7.58411e-05	9.36038e-05	-1	0	0	-1
Otu0834	Bacteria(100)-Firmicutes(100)-Clostridia(100)-Clostridiales(100)-Lachnospiraceae(100)-Coprococcus(100)-	3.22732e-05	4.62918e-05	0	0	0.000627092	0.000679877	1	0	0	1
Otu0875	Bacteria(100)-Bacteroidetes(100)-Bacteroidia(100)-Bacteroidales(100)-Porphyromonadaceae(100)-Barnesiella(100)-	0.000921211	0.00040911	0.00112062	0.000332253	0.000436435	0.000255358	-1	0	0	-1
Otu0907	Bacteria(100)-Firmicutes(100)-Clostridia(100)-Clostridiales(100)-Ruminococcaceae(100)-Flavonifractor(100)-	5.97447e-05	4.7198e-05	1.63249e-06	3.57145e-06	6.50104e-05	5.79691e-05	1	0	0	1
Otu0922	Bacteria(100)-Firmicutes(100)-Clostridia(100)-Clostridiales(100)-Ruminococcaceae(100)-Sporobacter(100)-	0.00103972	0.000994285	0.00115656	0.000373253	0.000490266	0.000289993	-1	0	0	-1
Otu0937	Bacteria(100)-Firmicutes(100)-Clostridia(100)-Clostridiales(100)-Ruminococcaceae(100)-Clostridium_III(100)-	7.94169e-06	1.67599e-05	2.523e-05	1.16902e-05	1.05472e-06	3.16415e-06	-1	0	0	-1
Otu0954	Bacteria(100)-Proteobacteria(100)-Betaproteobacteria(100)-Burkholderiales(100)-Sutterellaceae(100)-Sutterella(100)-	0	0	0	0	0.000360693	0.000416361	1	0	0	1
Otu0959	Bacteria(100)-Actinobacteria(100)-Actinobacteria(100)-Coriobacteriales(100)-Coriobacteriaceae(100)-Adlercreutzia(100)-	1.3025e-05	1.24046e-05	1.65038e-05	1.03974e-05	4.25489e-06	7.22133e-06	-1	0	0	-1
Otu0962	Bacteria(100)-Firmicutes(100)-Clostridia(100)-Clostridiales(100)-Ruminococcaceae(100)-Clostridium_IV(100)-	4.01719e-05	1.77592e-05	3.49146e-05	3.25137e-05	0.00010459	4.43064e-05	1	0	0	1
Otu0979	Bacteria(100)-Firmicutes(100)-Clostridia(100)-Clostridiales(100)-Ruminococcaceae(100)-Butyricicoccus(100)-	7.30352e-06	1.41211e-05	0	0	7.34446e-05	6.2569e-05	1	0	0	1
Otu1004	Bacteria(100)-Elusimicrobia(100)-Elusimicrobia(100)-Elusimicrobiales(100)-Elusimicrobiaceae(100)-Elusimicrobium(100)-	0.00148518	0.0012758	0.000518096	0.000417418	0.00156874	0.000980286	1	0	0	1
Otu1039	Bacteria(100)-Firmicutes(100)-Clostridia(100)-Clostridiales(100)-Ruminococcaceae(100)-Hydrogenoanaerobacterium(100)-	0.000295641	0.000207224	0.000135215	7.41745e-05	0.000339438	0.00011242	1	0	0	1
Otu1081	Bacteria(100)-Actinobacteria(100)-Actinobacteria(100)-Coriobacteriales(100)-Coriobacteriaceae(100)-Olsenella(100)-	1.29658e-05	1.68433e-05	5.07586e-05	3.50066e-05	7.53426e-06	1.64467e-05	-1	0	0	-1
Otu1094	Bacteria(100)-Firmicutes(100)-Clostridia(100)-Clostridiales(100)-Lachnospiraceae(100)-Syntrophococcus(100)-	1.50201e-05	3.15458e-05	2.21248e-06	4.68255e-06	0.000327539	0.000806998	1	0	0	1
Otu1102	Bacteria(100)-Firmicutes(100)-Clostridia(100)-Clostridiales(100)-Gracilibacteraceae(100)-Lutispora(100)-	8.72957e-05	6.83949e-05	0.000180573	0.000125054	2.72593e-05	2.59883e-05	-1	0	0	-1
Otu1104	Bacteria(100)-Proteobacteria(100)-Alphaproteobacteria(100)-Rhodospirillales(100)-Rhodospirillaceae(100)-Insolitispirillum(100)-	4.63345e-05	0.000119898	6.86417e-06	7.83066e-06	5.6337e-05	5.66259e-05	1	0	0	1
Otu1106	Bacteria(100)-Bacteroidetes(100)-Bacteroidia(100)-Bacteroidales(100)-Porphyromonadaceae(100)-Tannerella(100)-	4.99982e-05	4.99304e-05	0	0	7.27145e-05	5.68675e-05	1	0	0	1
Otu1130	Bacteria(100)-Actinobacteria(100)-Actinobacteria(100)-Coriobacteriales(100)-Coriobacteriaceae(100)-Gordonibacter(100)-	0.000220173	0.000103452	0.000113419	6.15647e-05	0.00024256	9.88199e-05	1	0	0	1
Otu1133	Bacteria(100)-Firmicutes(100)-Clostridia(100)-Clostridiales(100)-Ruminococcaceae(100)-Oscillibacter(100)-	6.55438e-06	1.1856e-05	0	0	2.75392e-05	2.35291e-05	1	0	0	1
Otu1134	Bacteria(100)-Firmicutes(100)-Clostridia(100)-Clostridiales(100)-Ruminococcaceae(100)-Ruminococcus(100)-	0.00767584	0.0126575	3.58141e-06	1.13254e-05	0.0123767	0.0125973	1	0	0	1
Otu1137	Bacteria(100)-Firmicutes(100)-Clostridia(100)-Clostridiales(100)-Ruminococcaceae(100)-Papillibacter(100)-	3.50185e-05	3.53959e-05	3.58793e-05	2.89893e-05	0.000106366	4.60904e-05	1	0	0	1
Otu1148	Bacteria(100)-Firmicutes(100)-Clostridia(100)-Clostridiales(100)-Ruminococcaceae(100)-Pseudoflavonifractor(100)-	2.1534e-05	2.64175e-05	1.91334e-06	6.0505e-06	3.20949e-05	2.20604e-05	1	0	0	1
Otu1180	Bacteria(100)-Proteobacteria(100)-Deltaproteobacteria(100)-Bdellovibrionales(100)-Bdellovibrionaceae(100)-Vampirovibrio(100)-	0.000835435	0.00113089	0.000461915	0.000256086	0.00208217	0.0012913	1	0	0	1

## Sheet: ForPlotting
Comparison Age_8_Age_18	Taxonomy	MeanAge8	StdAge8	MeanAge18	StdAge18	MeanAge24	StdAge24	A8-A18	A8-A24	A18-A24	Cat			OriginalIDs	Cat Corr
Otu0914	Bacteria(100)-Firmicutes(100)-Clostridia(100)-Clostridiales(100)-Lachnospiraceae(100)-Lactonifactor(100)-	0	0	9.46112e-06	7.4482e-06	0	0	1	0	-1	Cat 9			914
Otu0177	Bacteria(100)-Firmicutes(100)-Negativicutes(100)-Selenomonadales(100)-Veillonellaceae(100)-Anaerosinus(100)-	0.000362298	0.00036216	6.3448e-05	7.63421e-05	0.00162939	0.00261648	-1	0	1	Cat 10			177
Otu0229	Bacteria(100)-Firmicutes(100)-Clostridia(100)-Clostridiales(100)-Lachnospiraceae(100)-Lachnospiracea_incertae_sedis(100)-	0.000517905	0.000734107	0	0	0.000541865	0.000709437	-1	0	1	Cat 10			229
Otu0354	Bacteria(100)-Firmicutes(100)-Clostridia(100)-Clostridiales(100)-Lachnospiraceae(100)-Acetitomaculum(100)-	0.000102009	0.000100284	0	0	0.000111261	8.67133e-05	-1	0	1	Cat 10			354
Otu0496	Bacteria(100)-Firmicutes(100)-Clostridia(100)-Clostridiales(100)-Lachnospiraceae(100)-Dorea(100)-	0.000262177	0.000291711	1.0152e-05	1.45744e-05	0.000150394	0.000154251	-1	0	1	Cat 10			496
Otu0499	Bacteria(100)-Firmicutes(100)-Clostridia(100)-Clostridiales(100)-Lachnospiraceae(100)-Lachnospiracea_incertae_sedis(100)-	4.06919e-05	4.89402e-05	0	0	0.000425002	0.000621619	-1	0	1	Cat 10			499
Otu0550	Bacteria(100)-Elusimicrobia(100)-Elusimicrobia(100)-Elusimicrobiales(100)-Elusimicrobiaceae(100)-Elusimicrobium(100)-	0.000806825	0.000748871	0.000100725	0.000188049	0.000496442	0.000367073	-1	0	1	Cat 10			550
Otu0570	Bacteria(100)-Firmicutes(100)-Clostridia(100)-Clostridiales(100)-Ruminococcaceae(100)-Clostridium_IV(100)-	0.000129371	0.000111736	0	0	6.46039e-05	9.47869e-05	-1	0	1	Cat 10			570
Otu0630	Bacteria(100)-Firmicutes(100)-Clostridia(100)-Clostridiales(100)-Lachnospiraceae(100)-Clostridium_XlVb(100)-	0.000351373	0.000690118	0	0	0.000283747	0.000318273	-1	0	1	Cat 10			630
Otu0782	Bacteria(100)-Firmicutes(100)-Clostridia(100)-Clostridiales(100)-Lachnospiraceae(100)-Acetitomaculum(100)-	9.88527e-05	0.000115116	0	0	8.4066e-05	8.0896e-05	-1	0	1	Cat 10			782
Otu0809	Bacteria(100)-Firmicutes(100)-Clostridia(100)-Clostridiales(100)-Lachnospiraceae(100)-Lachnobacterium(100)-	0.000146076	0.000270574	0	0	0.000391833	0.000350352	-1	0	1	Cat 10			809
Otu0874	Bacteria(100)-Firmicutes(100)-Clostridia(100)-Clostridiales(100)-Ruminococcaceae(100)-Clostridium_III(100)-	3.30323e-05	3.00161e-05	0	0	2.69167e-05	2.92375e-05	-1	0	1	Cat 10			874
Otu0892	Bacteria(100)-Firmicutes(100)-Clostridia(100)-Clostridiales(100)-Clostridiales_Incertae_Sedis_XIII(100)-Anaerovorax(100)-	0.000189025	0.000205366	0	0	0.000248343	0.0002708	-1	0	1	Cat 10			892
Otu0973	Bacteria(100)-Firmicutes(100)-Clostridia(100)-Clostridiales(100)-Lachnospiraceae(100)-Acetitomaculum(100)-	0.000197373	0.000105407	0	0	0.000221077	0.000139743	-1	0	1	Cat 10			973
Otu1008	Bacteria(100)-Firmicutes(100)-Clostridia(100)-Clostridiales(100)-Clostridiales_Incertae_Sedis_XII(100)-Guggenheimella(100)-	0.000134247	9.02959e-05	6.13806e-07	1.94102e-06	0.000119488	9.5345e-05	-1	0	1	Cat 10			1008
Otu1015	Bacteria(100)-Firmicutes(100)-Clostridia(100)-Clostridiales(100)-Lachnospiraceae(100)-Syntrophococcus(100)-	0.000750931	0.000645757	1.1938e-06	3.77513e-06	0.000809332	0.000634707	-1	0	1	Cat 10			1015
Otu1166	Bacteria(100)-Firmicutes(100)-Clostridia(100)-Clostridiales(100)-Lachnospiraceae(100)-Parasporobacterium(100)-	0.000106692	0.000141648	0	0	0.000208865	0.000315717	-1	0	1	Cat 10			1166
Otu1184	Bacteria(100)-Firmicutes(100)-Clostridia(100)-Clostridiales(100)-Ruminococcaceae(100)-Acetivibrio(100)-	4.73703e-05	3.17215e-05	0	0	2.88551e-05	4.56143e-05	-1	0	1	Cat 10			1184
Otu0134	Bacteria(100)-Firmicutes(100)-Clostridia(100)-Clostridiales(100)-Lachnospiraceae(100)-Syntrophococcus(91)-	0.000212939	8.7691e-05	0.000511794	0.000432545	0.000253438	0.000111595	1	0	0	Cat 13			134
Otu0319	Bacteria(100)-Firmicutes(100)-Clostridia(100)-Clostridiales(100)-Ruminococcaceae(100)-Ruminococcus(100)-	0.000194545	0.000158457	0.00391	0.00480013	0.00205057	0.00265604	1	0	0	Cat 13			319
Otu0557	Bacteria(100)-Firmicutes(100)-Clostridia(100)-Clostridiales(100)-Ruminococcaceae(100)-Clostridium_IV(100)-	0	0	0.000748219	0.000650186	0.00031107	0.000305802	1	0	0	Cat 13			557
Otu0560	Bacteria(100)-Firmicutes(100)-Clostridia(100)-Clostridiales(100)-Clostridiaceae_4(100)-Thermotalea(92)-	1.96553e-06	4.21717e-06	9.99614e-05	6.78959e-05	1.19882e-05	1.8223e-05	1	0	0	Cat 13			560
Otu0420	Bacteria(100)-Firmicutes(100)-Clostridia(100)-Clostridiales(100)-Lachnospiraceae(100)-Clostridium_XlVb(100)-	4.15567e-05	1.92101e-05	7.02038e-05	5.17841e-05	0.000116783	4.07455e-05	0	1	0	Cat 14			420
Otu0005	Bacteria(100)-Firmicutes(100)-Clostridia(100)-Clostridiales(100)-unclassified-unclassified-	0.0156195	0.00825297	0.0106249	0.00256534	0.0174267	0.00399944	0	0	1	Cat 15			5
Otu0018	Bacteria(100)-Firmicutes(100)-Clostridia(100)-Clostridiales(100)-Ruminococcaceae(100)-Pseudoflavonifractor(62)-	0.00201837	0.00160736	0.00123925	0.000652117	0.00362738	0.00193492	0	0	1	Cat 15			18
Otu0022	Bacteria(100)-Firmicutes(100)-Clostridia(100)-Clostridiales(100)-Lachnospiraceae(100)-Clostridium_XlVa(81)-	0.00436061	0.00366283	0.00162092	0.000982289	0.00426522	0.00191379	0	0	1	Cat 15			22
Otu0055	Bacteria(100)-Firmicutes(100)-Clostridia(100)-Clostridiales(100)-Clostridiales_Incertae_Sedis_XII(100)-Acidaminobacter(100)-	0.00331843	0.00168657	0.00232605	0.000812383	0.00397543	0.00109604	0	0	1	Cat 15			55
Otu0098	Bacteria(100)-Firmicutes(100)-Clostridia(100)-Clostridiales(100)-Ruminococcaceae(100)-Sporobacter(100)-	0.00108272	0.000756826	0.000718583	0.000280461	0.00165811	0.00111849	0	0	1	Cat 15			98
Otu0126	Bacteria(100)-Firmicutes(100)-Clostridia(100)-Clostridiales(100)-Lachnospiraceae(100)-Clostridium_XlVa(100)-	9.72893e-05	9.5857e-05	2.07835e-05	1.74589e-05	0.000739076	0.000670665	0	0	1	Cat 15			126
Otu0143	Bacteria(100)-Firmicutes(100)-Clostridia(100)-Clostridiales(100)-Lachnospiraceae(100)-unclassified-	9.68023e-05	7.61463e-05	5.79066e-05	4.35895e-05	0.000515851	0.000459673	0	0	1	Cat 15			143
Otu0207	Bacteria(100)-Firmicutes(100)-Clostridia(100)-Clostridiales(100)-Ruminococcaceae(100)-Hydrogenoanaerobacterium(100)-	0.00215858	0.00277979	0.000990721	0.000702627	0.0051581	0.00340203	0	0	1	Cat 15			207
Otu0212	Bacteria(100)-Firmicutes(100)-Clostridia(100)-Clostridiales(100)-Ruminococcaceae(100)-Faecalibacterium(100)-	2.72495e-05	2.92724e-05	1.12496e-05	1.37538e-05	6.49204e-05	4.71222e-05	0	0	1	Cat 15			212
Otu0214	Bacteria(100)-Firmicutes(100)-Clostridia(100)-Clostridiales(100)-Ruminococcaceae(100)-Flavonifractor(57)-	9.39863e-05	0.000108273	1.97843e-05	2.04451e-05	0.000112667	6.57204e-05	0	0	1	Cat 15			214
Otu0222	Bacteria(100)-Firmicutes(100)-Clostridia(100)-Clostridiales(100)-Ruminococcaceae(100)-Sporobacter(100)-	9.80359e-05	0.000113568	3.3942e-05	2.62188e-05	0.000149098	0.000166287	0	0	1	Cat 15			222
Otu0245	Bacteria(100)-Firmicutes(100)-Clostridia(100)-Clostridiales(100)-Ruminococcaceae(100)-Oscillibacter(100)-	0.000100611	0.000132857	4.6044e-05	4.77862e-05	0.000166511	0.000104261	0	0	1	Cat 15			245
Otu0274	Bacteria(100)-Firmicutes(100)-Clostridia(100)-Clostridiales(100)-Lachnospiraceae(100)-Johnsonella(100)-	2.36212e-05	3.63657e-05	1.02354e-05	1.42509e-05	0.000170063	0.000174728	0	0	1	Cat 15			274
Otu0349	Bacteria(100)-Firmicutes(100)-Clostridia(100)-Clostridiales(100)-Lachnospiraceae(100)-Clostridium_XlVa(100)-	0.000264769	0.000241148	3.28693e-05	3.6776e-05	0.000313978	0.000228012	0	0	1	Cat 15			349
Otu0371	Bacteria(100)-Proteobacteria(100)-Alphaproteobacteria(100)-Rhizobiales(100)-Hyphomicrobiaceae(100)-Gemmiger(100)-	5.74183e-05	0.000109879	3.271e-05	5.14112e-05	0.000240289	0.000296218	0	0	1	Cat 15			371
Otu0423	Bacteria(100)-Firmicutes(100)-Clostridia(100)-Clostridiales(100)-Clostridiaceae_1(100)-Anaerosporobacter(100)-	6.16233e-05	7.87379e-05	8.13168e-06	2.57146e-05	5.03164e-05	4.91746e-05	0	0	1	Cat 15			423
Otu0426	Bacteria(100)-Firmicutes(100)-Clostridia(100)-Clostridiales(100)-Ruminococcaceae(100)-Pseudoflavonifractor(100)-	0.000142159	0.000176614	5.78951e-05	3.61608e-05	0.000192578	6.27853e-05	0	0	1	Cat 15			426
Otu0435	Bacteria(100)-Firmicutes(100)-Clostridia(100)-Clostridiales(100)-Lachnospiraceae(100)-Clostridium_XlVa(100)-	9.23422e-05	0.00018692	1.7431e-05	4.19323e-05	0.000272383	0.000358982	0	0	1	Cat 15			435
Otu0482	Bacteria(100)-Firmicutes(100)-Clostridia(100)-Clostridiales(100)-Lachnospiraceae(100)-Lachnobacterium(53)-	0.00166304	0.00176299	0.000176942	0.000369745	0.000511224	0.000374432	0	0	1	Cat 15			482
Otu0486	Bacteria(100)-Firmicutes(100)-Clostridia(100)-Clostridiales(100)-Ruminococcaceae(100)-Ruminococcus(100)-	0.00212627	0.00382919	0	0	0.00196003	0.002788	0	0	1	Cat 15			486
Otu0513	Bacteria(100)-Tenericutes(100)-Mollicutes(100)-Anaeroplasmatales(100)-Anaeroplasmataceae(100)-Anaeroplasma(100)-	0.000500696	0.000978121	0.000133216	0.000216332	0.000588403	0.00030885	0	0	1	Cat 15			513
Otu0538	Bacteria(100)-Firmicutes(100)-Clostridia(100)-Clostridiales(100)-Lachnospiraceae(100)-Marvinbryantia(100)-	0.00312272	0.00532787	0.000187653	0.000369824	0.00198151	0.00170526	0	0	1	Cat 15			538
Otu0558	Bacteria(100)-Firmicutes(100)-Clostridia(100)-Clostridiales(100)-Lachnospiraceae(100)-Clostridium_XlVa(100)-	0.000667386	0.00114413	0.000204481	0.000509415	0.00127701	0.00113747	0	0	1	Cat 15			558
Otu0599	Bacteria(100)-Firmicutes(100)-Clostridia(100)-Clostridiales(100)-Lachnospiraceae(100)-Clostridium_XlVa(100)-	9.46147e-05	5.40249e-05	5.37941e-05	0.000125905	0.0003278	0.00032086	0	0	1	Cat 15			599
Otu0616	Bacteria(100)-Firmicutes(100)-Clostridia(100)-Clostridiales(100)-Lachnospiraceae(100)-Lactonifactor(100)-	0.000552205	0.00106977	9.9455e-05	0.000113783	0.000924927	0.0012439	0	0	1	Cat 15			616
Otu0648	Bacteria(100)-Firmicutes(100)-Clostridia(100)-Clostridiales(100)-Lachnospiraceae(100)-Clostridium_XlVa(100)-	4.03533e-05	6.14725e-05	1.57182e-06	3.41155e-06	4.41626e-05	3.77176e-05	0	0	1	Cat 15			648
Otu0649	Bacteria(100)-Firmicutes(100)-Clostridia(100)-Clostridiales(100)-Ruminococcaceae(100)-Acetivibrio(100)-	0.000316296	0.000666442	0	0	0.00015852	0.000298677	0	0	1	Cat 15			649
Otu0705	Bacteria(100)-Proteobacteria(100)-Alphaproteobacteria(100)-Rhodospirillales(100)-Rhodospirillaceae(100)-Dongia(100)-	2.52784e-05	5.17225e-05	0	0	6.6884e-05	7.33181e-05	0	0	1	Cat 15			705
Otu0726	Bacteria(100)-Firmicutes(100)-Clostridia(100)-Clostridiales(100)-Ruminococcaceae(100)-Clostridium_III(100)-	3.6457e-05	3.22454e-05	0	0	4.34523e-05	3.68112e-05	0	0	1	Cat 15			726
Otu0730	Bacteria(100)-Firmicutes(100)-Clostridia(100)-Clostridiales(100)-Ruminococcaceae(100)-Anaerofilum(100)-	0.000111853	0.000120641	1.72131e-05	3.18269e-05	0.000131181	6.9815e-05	0	0	1	Cat 15			730
Otu0733	Bacteria(100)-Firmicutes(100)-Clostridia(100)-Clostridiales(100)-Lachnospiraceae(100)-Parasporobacterium(100)-	8.10258e-05	0.000158577	0	0	0.000122567	0.000120471	0	0	1	Cat 15			733
Otu0834	Bacteria(100)-Firmicutes(100)-Clostridia(100)-Clostridiales(100)-Lachnospiraceae(100)-Coprococcus(100)-	3.22732e-05	4.62918e-05	0	0	0.000627092	0.000679877	0	0	1	Cat 15			834
Otu0907	Bacteria(100)-Firmicutes(100)-Clostridia(100)-Clostridiales(100)-Ruminococcaceae(100)-Flavonifractor(100)-	5.97447e-05	4.7198e-05	1.63249e-06	3.57145e-06	6.50104e-05	5.79691e-05	0	0	1	Cat 15			907
Otu0954	Bacteria(100)-Proteobacteria(100)-Betaproteobacteria(100)-Burkholderiales(100)-Sutterellaceae(100)-Sutterella(100)-	0	0	0	0	0.000360693	0.000416361	0	0	1	Cat 15			954
Otu0962	Bacteria(100)-Firmicutes(100)-Clostridia(100)-Clostridiales(100)-Ruminococcaceae(100)-Clostridium_IV(100)-	4.01719e-05	1.77592e-05	3.49146e-05	3.25137e-05	0.00010459	4.43064e-05	0	0	1	Cat 15			962
Otu0979	Bacteria(100)-Firmicutes(100)-Clostridia(100)-Clostridiales(100)-Ruminococcaceae(100)-Butyricicoccus(100)-	7.30352e-06	1.41211e-05	0	0	7.34446e-05	6.2569e-05	0	0	1	Cat 15			979
Otu1004	Bacteria(100)-Elusimicrobia(100)-Elusimicrobia(100)-Elusimicrobiales(100)-Elusimicrobiaceae(100)-Elusimicrobium(100)-	0.00148518	0.0012758	0.000518096	0.000417418	0.00156874	0.000980286	0	0	1	Cat 15			1004
Otu1039	Bacteria(100)-Firmicutes(100)-Clostridia(100)-Clostridiales(100)-Ruminococcaceae(100)-Hydrogenoanaerobacterium(100)-	0.000295641	0.000207224	0.000135215	7.41745e-05	0.000339438	0.00011242	0	0	1	Cat 15			1039
Otu1094	Bacteria(100)-Firmicutes(100)-Clostridia(100)-Clostridiales(100)-Lachnospiraceae(100)-Syntrophococcus(100)-	1.50201e-05	3.15458e-05	2.21248e-06	4.68255e-06	0.000327539	0.000806998	0	0	1	Cat 15			1094
Otu1104	Bacteria(100)-Proteobacteria(100)-Alphaproteobacteria(100)-Rhodospirillales(100)-Rhodospirillaceae(100)-Insolitispirillum(100)-	4.63345e-05	0.000119898	6.86417e-06	7.83066e-06	5.6337e-05	5.66259e-05	0	0	1	Cat 15			1104
Otu1106	Bacteria(100)-Bacteroidetes(100)-Bacteroidia(100)-Bacteroidales(100)-Porphyromonadaceae(100)-Tannerella(100)-	4.99982e-05	4.99304e-05	0	0	7.27145e-05	5.68675e-05	0	0	1	Cat 15			1106
Otu1130	Bacteria(100)-Actinobacteria(100)-Actinobacteria(100)-Coriobacteriales(100)-Coriobacteriaceae(100)-Gordonibacter(100)-	0.000220173	0.000103452	0.000113419	6.15647e-05	0.00024256	9.88199e-05	0	0	1	Cat 15			1130
Otu1133	Bacteria(100)-Firmicutes(100)-Clostridia(100)-Clostridiales(100)-Ruminococcaceae(100)-Oscillibacter(100)-	6.55438e-06	1.1856e-05	0	0	2.75392e-05	2.35291e-05	0	0	1	Cat 15			1133
Otu1134	Bacteria(100)-Firmicutes(100)-Clostridia(100)-Clostridiales(100)-Ruminococcaceae(100)-Ruminococcus(100)-	0.00767584	0.0126575	3.58141e-06	1.13254e-05	0.0123767	0.0125973	0	0	1	Cat 15			1134
Otu1137	Bacteria(100)-Firmicutes(100)-Clostridia(100)-Clostridiales(100)-Ruminococcaceae(100)-Papillibacter(100)-	3.50185e-05	3.53959e-05	3.58793e-05	2.89893e-05	0.000106366	4.60904e-05	0	0	1	Cat 15			1137
Otu1148	Bacteria(100)-Firmicutes(100)-Clostridia(100)-Clostridiales(100)-Ruminococcaceae(100)-Pseudoflavonifractor(100)-	2.1534e-05	2.64175e-05	1.91334e-06	6.0505e-06	3.20949e-05	2.20604e-05	0	0	1	Cat 15			1148
Otu1180	Bacteria(100)-Proteobacteria(100)-Deltaproteobacteria(100)-Bdellovibrionales(100)-Bdellovibrionaceae(100)-Vampirovibrio(100)-	0.000835435	0.00113089	0.000461915	0.000256086	0.00208217	0.0012913	0	0	1	Cat 15			1180
Otu0595	Bacteria(100)-Firmicutes(100)-Clostridia(100)-Clostridiales(100)-Lachnospiraceae(100)-Acetitomaculum(100)-	0.000167201	0.000159753	0	0	6.19913e-05	9.88323e-05	-1	0	0	Cat 16			595
Otu0638	Bacteria(100)-Proteobacteria(100)-Alphaproteobacteria(100)-Rickettsiales(100)-Rickettsiaceae(100)-Orientia(100)-	5.53794e-05	2.9482e-05	0	0	1.42774e-05	2.99475e-05	-1	0	0	Cat 16			638
Otu0728	Bacteria(100)-Firmicutes(100)-Clostridia(100)-Clostridiales(100)-Lachnospiraceae(100)-Lachnospiracea_incertae_sedis(100)-	0.000130261	0.00012117	0	0	1.49894e-05	1.51506e-05	-1	0	0	Cat 16			728
Otu0829	Bacteria(100)-Firmicutes(100)-Clostridia(100)-Clostridiales(100)-Lachnospiraceae(100)-Roseburia(100)-	4.73903e-05	5.43349e-05	0	0	3.7405e-05	4.52688e-05	-1	0	0	Cat 16			829
Otu0929	Bacteria(100)-Firmicutes(100)-Clostridia(100)-Clostridiales(100)-Ruminococcaceae(100)-Oscillibacter(100)-	1.83739e-05	2.02405e-05	0	0	1.00852e-05	8.62378e-06	-1	0	0	Cat 16			929
Otu1070	Bacteria(100)-Firmicutes(100)-Clostridia(100)-Clostridiales(100)-Lachnospiraceae(100)-Coprococcus(100)-	0.00267995	0.00286759	0.000292901	0.000912279	0.00149002	0.0018478	-1	0	0	Cat 16			1070
Otu1079	Bacteria(100)-Firmicutes(100)-Clostridia(100)-Clostridiales(100)-Lachnospiraceae(100)-Dorea(100)-	9.08715e-05	6.62003e-05	1.28249e-05	9.54977e-06	0.000105552	0.00010099	-1	0	0	Cat 16			1079
Otu1145	Bacteria(100)-Firmicutes(100)-Clostridia(100)-Clostridiales(100)-Ruminococcaceae(100)-Clostridium_III(100)-	5.11418e-05	5.70227e-05	0	0	5.5467e-06	5.77736e-06	-1	0	0	Cat 16			1145
Otu0128	Bacteria(100)-Bacteroidetes(100)-Bacteroidia(100)-Bacteroidales(100)-Porphyromonadaceae(100)-Barnesiella(100)-	0.00224407	0.0010444	0.00317438	0.00163821	0.00111434	0.000698944	0	0	-1	Cat 18			128
Otu0178	Bacteria(100)-Firmicutes(100)-Clostridia(100)-Clostridiales(100)-Ruminococcaceae(100)-Ruminococcus(100)-	0.00349856	0.00304725	0.00908435	0.00313381	0.00398497	0.000960717	0	0	-1	Cat 18			178
Otu0232	Bacteria(100)-Firmicutes(100)-Clostridia(100)-Clostridiales(100)-Lachnospiraceae(100)-Robinsoniella(51)-	0.000625029	0.000881933	0.000420772	0.000335815	0.000120895	5.90549e-05	0	0	-1	Cat 18			232
Otu0269	Bacteria(100)-Firmicutes(100)-Clostridia(100)-Clostridiales(100)-Ruminococcaceae(100)-Papillibacter(100)-	0.000633146	0.000375356	0.000966222	0.000460822	0.00026181	0.000138808	0	0	-1	Cat 18			269
Otu0299	Bacteria(100)-Firmicutes(100)-Clostridia(100)-Clostridiales(100)-Lachnospiraceae(100)-Clostridium_XlVa(100)-	0.000135252	9.03365e-05	0.000287896	0.000368407	2.2333e-05	2.43203e-05	0	0	-1	Cat 18			299
Otu0408	Bacteria(100)-Bacteroidetes(100)-Bacteroidia(100)-Bacteroidales(100)-Porphyromonadaceae(100)-Barnesiella(100)-	0.000404683	0.000378734	0.000988844	0.000391136	0.000378468	0.000152741	0	0	-1	Cat 18			408
Otu0502	Bacteria(100)-Firmicutes(100)-Clostridia(100)-Clostridiales(100)-Lachnospiraceae(100)-Lactonifactor(100)-	0.000319987	0.000196919	0.000732496	0.000404722	0.000202852	0.000141575	0	0	-1	Cat 18			502
Otu0575	Bacteria(100)-Firmicutes(100)-Clostridia(100)-Clostridiales(100)-Lachnospiraceae(100)-Butyrivibrio(100)-	7.54891e-06	1.41818e-05	2.88464e-05	3.3519e-05	9.96351e-07	2.98905e-06	0	0	-1	Cat 18			575
Otu0725	Bacteria(100)-Firmicutes(100)-Clostridia(100)-Clostridiales(100)-Lachnospiraceae(100)-Butyrivibrio(100)-	0.000118263	0.000125941	0.000287976	0.000294112	9.60383e-05	5.38072e-05	0	0	-1	Cat 18			725
Otu0761	Bacteria(100)-Firmicutes(100)-Clostridia(100)-Clostridiales(100)-Lachnospiraceae(100)-Anaerostipes(100)-	0.00115497	0.00150773	0.00134333	0.0017114	7.58411e-05	9.36038e-05	0	0	-1	Cat 18			761
Otu0875	Bacteria(100)-Bacteroidetes(100)-Bacteroidia(100)-Bacteroidales(100)-Porphyromonadaceae(100)-Barnesiella(100)-	0.000921211	0.00040911	0.00112062	0.000332253	0.000436435	0.000255358	0	0	-1	Cat 18			875
Otu0922	Bacteria(100)-Firmicutes(100)-Clostridia(100)-Clostridiales(100)-Ruminococcaceae(100)-Sporobacter(100)-	0.00103972	0.000994285	0.00115656	0.000373253	0.000490266	0.000289993	0	0	-1	Cat 18			922
Otu0937	Bacteria(100)-Firmicutes(100)-Clostridia(100)-Clostridiales(100)-Ruminococcaceae(100)-Clostridium_III(100)-	7.94169e-06	1.67599e-05	2.523e-05	1.16902e-05	1.05472e-06	3.16415e-06	0	0	-1	Cat 18			937
Otu0959	Bacteria(100)-Actinobacteria(100)-Actinobacteria(100)-Coriobacteriales(100)-Coriobacteriaceae(100)-Adlercreutzia(100)-	1.3025e-05	1.24046e-05	1.65038e-05	1.03974e-05	4.25489e-06	7.22133e-06	0	0	-1	Cat 18			959
Otu1081	Bacteria(100)-Actinobacteria(100)-Actinobacteria(100)-Coriobacteriales(100)-Coriobacteriaceae(100)-Olsenella(100)-	1.29658e-05	1.68433e-05	5.07586e-05	3.50066e-05	7.53426e-06	1.64467e-05	0	0	-1	Cat 18			1081
Otu1102	Bacteria(100)-Firmicutes(100)-Clostridia(100)-Clostridiales(100)-Gracilibacteraceae(100)-Lutispora(100)-	8.72957e-05	6.83949e-05	0.000180573	0.000125054	2.72593e-05	2.59883e-05	0	0	-1	Cat 18			1102

## Sheet: IndicatorAnalysis
OTU	OTU	AGE	Indicator_Groups	Indicator_Value	pValue	Stat Diff Y/N	Taxonomy	Categories	Mean Age 8	Mean Age 18	Mean Age 24
Otu0834	Otu0834	24	sample_41-sample_42-sample_43-sample_44-sample_45-sample_46-sample_47-sample_49-sample_50	94.370415	<0.001000	Y	Bacteria(100)-Firmicutes(100)-Clostridia(100)-Clostridiales(100)-Lachnospiraceae(100)-Coprococcus(100)-	Cat 15	3.22732e-05	0	0.000627092	USED FOR PLOTTING
Otu0126	Otu0126	24	sample_41-sample_42-sample_43-sample_44-sample_45-sample_46-sample_47-sample_49-sample_50	86.619255	<0.001000	Y	Bacteria(100)-Firmicutes(100)-Clostridia(100)-Clostridiales(100)-Lachnospiraceae(100)-Clostridium_XlVa(100)-	Cat 15	9.72893e-05	2.07835e-05	0.000739076
Otu0274	Otu0274	24	sample_41-sample_42-sample_43-sample_44-sample_45-sample_46-sample_47-sample_49-sample_50	83.018867	<0.001000	Y	Bacteria(100)-Firmicutes(100)-Clostridia(100)-Clostridiales(100)-Lachnospiraceae(100)-Johnsonella(100)-	Cat 15	2.36212e-05	1.02354e-05	0.000170063
Otu0728	Otu0728	8	sample_1-sample_10-sample_2-sample_3-sample_4-sample_5-sample_6-sample_7-sample_8-sample_9	82.913383	<0.001000	Y	Bacteria(100)-Firmicutes(100)-Clostridia(100)-Clostridiales(100)-Lachnospiraceae(100)-Lachnospiracea_incertae_sedis(100)-	Cat 16	0.000130261	0	1.49894e-05
Otu0499	Otu0499	24	sample_41-sample_42-sample_43-sample_44-sample_45-sample_46-sample_47-sample_49-sample_50	81.720993	<0.001000	Y	Bacteria(100)-Firmicutes(100)-Clostridia(100)-Clostridiales(100)-Lachnospiraceae(100)-Lachnospiracea_incertae_sedis(100)-	Cat 10	4.06919e-05	0	0.000425002
Otu0676	Otu0676	24	sample_41-sample_42-sample_43-sample_44-sample_45-sample_46-sample_47-sample_49-sample_50	78.762314	<0.001000	N
Otu0954	Otu0954	24	sample_41-sample_42-sample_43-sample_44-sample_45-sample_46-sample_47-sample_49-sample_50	77.777779	<0.001000	Y	Bacteria(100)-Proteobacteria(100)-Betaproteobacteria(100)-Burkholderiales(100)-Sutterellaceae(100)-Sutterella(100)-	Cat 15	0	0	0.000360693
Otu0638	Otu0638	8	sample_1-sample_10-sample_2-sample_3-sample_4-sample_5-sample_6-sample_7-sample_8-sample_9	76.736839	<0.001000	Y	Bacteria(100)-Proteobacteria(100)-Alphaproteobacteria(100)-Rickettsiales(100)-Rickettsiaceae(100)-Orientia(100)-	Cat 16	5.53794e-05	0	1.42774e-05
Otu0264	Otu0264	24	sample_41-sample_42-sample_43-sample_44-sample_45-sample_46-sample_47-sample_49-sample_50	75.356415	<0.001000	N
Otu0143	Otu0143	24	sample_41-sample_42-sample_43-sample_44-sample_45-sample_46-sample_47-sample_49-sample_50	74.694687	<0.001000	Y	Bacteria(100)-Firmicutes(100)-Clostridia(100)-Clostridiales(100)-Lachnospiraceae(100)-unclassified-	Cat 15	9.68023e-05	5.79066e-05	0.000515851
Otu1145	Otu1145	8	sample_1-sample_10-sample_2-sample_3-sample_4-sample_5-sample_6-sample_7-sample_8-sample_9	74.306053	<0.001000	Y	Bacteria(100)-Firmicutes(100)-Clostridia(100)-Clostridiales(100)-Ruminococcaceae(100)-Clostridium_III(100)-	Cat 16	5.11418e-05	0	5.5467e-06
Otu0979	Otu0979	24	sample_41-sample_42-sample_43-sample_44-sample_45-sample_46-sample_47-sample_49-sample_50	72.618073	<0.001000	Y	Bacteria(100)-Firmicutes(100)-Clostridia(100)-Clostridiales(100)-Ruminococcaceae(100)-Butyricicoccus(100)-	Cat 15	7.30352e-06	0	7.34446e-05
Otu0809	Otu0809	24	sample_41-sample_42-sample_43-sample_44-sample_45-sample_46-sample_47-sample_49-sample_50	71.884445	<0.001000	Y	Bacteria(100)-Firmicutes(100)-Clostridia(100)-Clostridiales(100)-Lachnospiraceae(100)-Lachnobacterium(100)-	Cat 10	0.000146076	0	0.000391833
Otu0371	Otu0371	24	sample_41-sample_42-sample_43-sample_44-sample_45-sample_46-sample_47-sample_49-sample_50	71.350166	<0.001000	Y	Bacteria(100)-Proteobacteria(100)-Alphaproteobacteria(100)-Rhizobiales(100)-Hyphomicrobiaceae(100)-Gemmiger(100)-	Cat 15	5.74183e-05	3.271e-05	0.000240289
Otu0398	Otu0398	18	sample_11-sample_12-sample_13-sample_14-sample_15-sample_16-sample_17-sample_18-sample_19-sample_20	71.29438	<0.001000	N
Otu0482	Otu0482	8	sample_1-sample_10-sample_2-sample_3-sample_4-sample_5-sample_6-sample_7-sample_8-sample_9	70.85199	<0.001000	Y	Bacteria(100)-Firmicutes(100)-Clostridia(100)-Clostridiales(100)-Lachnospiraceae(100)-Lachnobacterium(53)-	Cat 15	0.00166304	0.000176942	0.000511224
Otu0599	Otu0599	24	sample_41-sample_42-sample_43-sample_44-sample_45-sample_46-sample_47-sample_49-sample_50	69.720306	<0.001000	Y	Bacteria(100)-Firmicutes(100)-Clostridia(100)-Clostridiales(100)-Lachnospiraceae(100)-Clostridium_XlVa(100)-	Cat 15	9.46147e-05	5.37941e-05	0.0003278
Otu0741	Otu0741	18	sample_11-sample_12-sample_13-sample_14-sample_15-sample_16-sample_17-sample_18-sample_19-sample_20	69.520309	<0.001000	N
Otu0560	Otu0560	18	sample_11-sample_12-sample_13-sample_14-sample_15-sample_16-sample_17-sample_18-sample_19-sample_20	69.324326	<0.001000	Y	Bacteria(100)-Firmicutes(100)-Clostridia(100)-Clostridiales(100)-Clostridiaceae_4(100)-Thermotalea(92)-	Cat 13	1.96553e-06	9.99614e-05	1.19882e-05
Otu0212	Otu0212	24	sample_41-sample_42-sample_43-sample_44-sample_45-sample_46-sample_47-sample_49-sample_50	67.911713	<0.001000	Y	Bacteria(100)-Firmicutes(100)-Clostridia(100)-Clostridiales(100)-Ruminococcaceae(100)-Faecalibacterium(100)-	Cat 15	2.72495e-05	1.12496e-05	6.49204e-05
Otu0613	Otu0613		sample_41-sample_42-sample_43-sample_44-sample_45-sample_46-sample_47-sample_49-sample_50	66.666672	<0.001000	N
Otu0112	Otu0112		sample_1-sample_10-sample_2-sample_3-sample_4-sample_5-sample_6-sample_7-sample_8-sample_9	66.513992	<0.001000	N
Otu0435	Otu0435	24	sample_41-sample_42-sample_43-sample_44-sample_45-sample_46-sample_47-sample_49-sample_50	66.458984	<0.001000	Y	Bacteria(100)-Firmicutes(100)-Clostridia(100)-Clostridiales(100)-Lachnospiraceae(100)-Clostridium_XlVa(100)-	Cat 15	9.23422e-05	1.7431e-05	0.000272383
Otu0096	Otu0096		sample_41-sample_42-sample_43-sample_44-sample_45-sample_46-sample_47-sample_49-sample_50	66.360474	<0.001000	N
Otu1028	Otu1028		sample_11-sample_12-sample_13-sample_14-sample_15-sample_16-sample_17-sample_18-sample_19-sample_20	66.071526	<0.001000	N
Otu0149	Otu0149		sample_1-sample_10-sample_2-sample_3-sample_4-sample_5-sample_6-sample_7-sample_8-sample_9	64.878044	<0.001000	N
Otu0595	Otu0595	8	sample_1-sample_10-sample_2-sample_3-sample_4-sample_5-sample_6-sample_7-sample_8-sample_9	64.714661	<0.001000	Y	Bacteria(100)-Firmicutes(100)-Clostridia(100)-Clostridiales(100)-Lachnospiraceae(100)-Acetitomaculum(100)-	Cat 16	0.000167201	0	6.19913e-05
Otu0726	Otu0726	24	sample_41-sample_42-sample_43-sample_44-sample_45-sample_46-sample_47-sample_49-sample_50	64.532921	<0.001000	Y	Bacteria(100)-Firmicutes(100)-Clostridia(100)-Clostridiales(100)-Ruminococcaceae(100)-Clostridium_III(100)-	Cat 15	3.6457e-05	0	4.34523e-05
Otu0787	Otu0787		sample_1-sample_10-sample_2-sample_3-sample_4-sample_5-sample_6-sample_7-sample_8-sample_9	64.060677	<0.001000	N
Otu0124	Otu0124		sample_11-sample_12-sample_13-sample_14-sample_15-sample_16-sample_17-sample_18-sample_19-sample_20	64.037613	<0.001000	N
Otu0248	Otu0248		sample_41-sample_42-sample_43-sample_44-sample_45-sample_46-sample_47-sample_49-sample_50	63.73225	<0.001000	N
Otu0207	Otu0207	24	sample_41-sample_42-sample_43-sample_44-sample_45-sample_46-sample_47-sample_49-sample_50	62.715305	<0.001000	Y	Bacteria(100)-Firmicutes(100)-Clostridia(100)-Clostridiales(100)-Ruminococcaceae(100)-Hydrogenoanaerobacterium(100)-	Cat 15	0.00215858	0.000990721	0.0051581
Otu0140	Otu0140		sample_1-sample_10-sample_2-sample_3-sample_4-sample_5-sample_6-sample_7-sample_8-sample_9	62.287086	<0.001000	N
Otu1180	Otu1180	24	sample_41-sample_42-sample_43-sample_44-sample_45-sample_46-sample_47-sample_49-sample_50	62.140076	<0.001000	Y	Bacteria(100)-Proteobacteria(100)-Deltaproteobacteria(100)-Bdellovibrionales(100)-Bdellovibrionaceae(100)-Vampirovibrio(100)-	Cat 15	0.000835435	0.000461915	0.00208217
Otu0705	Otu0705	24	sample_41-sample_42-sample_43-sample_44-sample_45-sample_46-sample_47-sample_49-sample_50	61.302681	<0.001000	Y	Bacteria(100)-Proteobacteria(100)-Alphaproteobacteria(100)-Rhodospirillales(100)-Rhodospirillaceae(100)-Dongia(100)-	Cat 15	2.52784e-05	0	6.6884e-05
Otu1106	Otu1106	24	sample_41-sample_42-sample_43-sample_44-sample_45-sample_46-sample_47-sample_49-sample_50	60.606064	<0.001000	Y	Bacteria(100)-Bacteroidetes(100)-Bacteroidia(100)-Bacteroidales(100)-Porphyromonadaceae(100)-Tannerella(100)-	Cat 15	4.99982e-05	0	7.27145e-05
Otu0721	Otu0721		sample_1-sample_10-sample_2-sample_3-sample_4-sample_5-sample_6-sample_7-sample_8-sample_9	60.287083	<0.001000	N
Otu0914	Otu0914	18	sample_11-sample_12-sample_13-sample_14-sample_15-sample_16-sample_17-sample_18-sample_19-sample_20	60.000004	<0.001000	Y	Bacteria(100)-Firmicutes(100)-Clostridia(100)-Clostridiales(100)-Lachnospiraceae(100)-Lactonifactor(100)-	Cat 9	0	9.46112e-06	0
Otu0558	Otu0558	24	sample_41-sample_42-sample_43-sample_44-sample_45-sample_46-sample_47-sample_49-sample_50	59.931511	<0.001000	Y	Bacteria(100)-Firmicutes(100)-Clostridia(100)-Clostridiales(100)-Lachnospiraceae(100)-Clostridium_XlVa(100)-	Cat 15	0.000667386	0.000204481	0.00127701
Otu0502	Otu0502	18	sample_11-sample_12-sample_13-sample_14-sample_15-sample_16-sample_17-sample_18-sample_19-sample_20	59.477318	<0.001000	Y	Bacteria(100)-Firmicutes(100)-Clostridia(100)-Clostridiales(100)-Lachnospiraceae(100)-Lactonifactor(100)-	Cat 18	0.000319987	0.000732496	0.000202852
Otu1081	Otu1081	18	sample_11-sample_12-sample_13-sample_14-sample_15-sample_16-sample_17-sample_18-sample_19-sample_20	57.857143	<0.001000	Y	Bacteria(100)-Actinobacteria(100)-Actinobacteria(100)-Coriobacteriales(100)-Coriobacteriaceae(100)-Olsenella(100)-	Cat 18	1.29658e-05	5.07586e-05	7.53426e-06
Otu0184	Otu0184		sample_41-sample_42-sample_43-sample_44-sample_45-sample_46-sample_47-sample_49-sample_50	57.494865	<0.001000	N
Otu0262	Otu0262		sample_11-sample_12-sample_13-sample_14-sample_15-sample_16-sample_17-sample_18-sample_19-sample_20	57.122707	<0.001000	N
Otu0937	Otu0937	18	sample_11-sample_12-sample_13-sample_14-sample_15-sample_16-sample_17-sample_18-sample_19-sample_20	56.984924	<0.001000	Y	Bacteria(100)-Firmicutes(100)-Clostridia(100)-Clostridiales(100)-Ruminococcaceae(100)-Clostridium_III(100)-	Cat 18	7.94169e-06	2.523e-05	1.05472e-06
Otu1162	Otu1162		sample_41-sample_42-sample_43-sample_44-sample_45-sample_46-sample_47-sample_49-sample_50	56.677021	<0.001000	N
Otu0186	Otu0186		sample_41-sample_42-sample_43-sample_44-sample_45-sample_46-sample_47-sample_49-sample_50	56.491035	<0.001000	N
Otu0408	Otu0408	18	sample_11-sample_12-sample_13-sample_14-sample_15-sample_16-sample_17-sample_18-sample_19-sample_20	56.462955	<0.001000	Y	Bacteria(100)-Bacteroidetes(100)-Bacteroidia(100)-Bacteroidales(100)-Porphyromonadaceae(100)-Barnesiella(100)-	Cat 18	0.000404683	0.000988844	0.000378468
Otu1184	Otu1184	8	sample_1-sample_10-sample_2-sample_3-sample_4-sample_5-sample_6-sample_7-sample_8-sample_9	55.644028	<0.001000	Y	Bacteria(100)-Firmicutes(100)-Clostridia(100)-Clostridiales(100)-Ruminococcaceae(100)-Acetivibrio(100)-	Cat 10	4.73703e-05	0	2.88551e-05
Otu1046	Otu1046		sample_41-sample_42-sample_43-sample_44-sample_45-sample_46-sample_47-sample_49-sample_50	55.555557	<0.001000	N
Otu0672	Otu0672		sample_1-sample_10-sample_2-sample_3-sample_4-sample_5-sample_6-sample_7-sample_8-sample_9	55.486427	<0.001000	N
Otu0245	Otu0245	24	sample_41-sample_42-sample_43-sample_44-sample_45-sample_46-sample_47-sample_49-sample_50	54.945053	<0.001000	Y	Bacteria(100)-Firmicutes(100)-Clostridia(100)-Clostridiales(100)-Ruminococcaceae(100)-Oscillibacter(100)-	Cat 15	0.000100611	4.6044e-05	0.000166511
Otu0178	Otu0178	18	sample_11-sample_12-sample_13-sample_14-sample_15-sample_16-sample_17-sample_18-sample_19-sample_20	54.906784	<0.001000	Y	Bacteria(100)-Firmicutes(100)-Clostridia(100)-Clostridiales(100)-Ruminococcaceae(100)-Ruminococcus(100)-	Cat 18	0.00349856	0.00908435	0.00398497
Otu0543	Otu0543		sample_41-sample_42-sample_43-sample_44-sample_45-sample_46-sample_47-sample_49-sample_50	54.892601	<0.001000	N
Otu0962	Otu0962	24	sample_41-sample_42-sample_43-sample_44-sample_45-sample_46-sample_47-sample_49-sample_50	54.704594	<0.001000	Y	Bacteria(100)-Firmicutes(100)-Clostridia(100)-Clostridiales(100)-Ruminococcaceae(100)-Clostridium_IV(100)-	Cat 15	4.01719e-05	3.49146e-05	0.00010459
Otu1133	Otu1133	24	sample_41-sample_42-sample_43-sample_44-sample_45-sample_46-sample_47-sample_49-sample_50	54.421772	<0.001000	Y	Bacteria(100)-Firmicutes(100)-Clostridia(100)-Clostridiales(100)-Ruminococcaceae(100)-Oscillibacter(100)-	Cat 15	6.55438e-06	0	2.75392e-05
Otu0049	Otu0049		sample_41-sample_42-sample_43-sample_44-sample_45-sample_46-sample_47-sample_49-sample_50	54.025829	<0.001000	N
Otu0943	Otu0943		sample_41-sample_42-sample_43-sample_44-sample_45-sample_46-sample_47-sample_49-sample_50	53.652348	<0.001000	N
Otu0686	Otu0686		sample_41-sample_42-sample_43-sample_44-sample_45-sample_46-sample_47-sample_49-sample_50	53.537285	<0.001000	N
Otu0828	Otu0828		sample_41-sample_42-sample_43-sample_44-sample_45-sample_46-sample_47-sample_49-sample_50	52.596981	<0.001000	N
Otu0963	Otu0963		sample_41-sample_42-sample_43-sample_44-sample_45-sample_46-sample_47-sample_49-sample_50	52.208839	<0.001000	N
Otu0352	Otu0352		sample_41-sample_42-sample_43-sample_44-sample_45-sample_46-sample_47-sample_49-sample_50	52.122517	<0.001000	N
Otu0426	Otu0426	24	sample_41-sample_42-sample_43-sample_44-sample_45-sample_46-sample_47-sample_49-sample_50	51.748253	<0.001000	Y	Bacteria(100)-Firmicutes(100)-Clostridia(100)-Clostridiales(100)-Ruminococcaceae(100)-Pseudoflavonifractor(100)-	Cat 15	0.000142159	5.78951e-05	0.000192578
Otu0134	Otu0134	18	sample_11-sample_12-sample_13-sample_14-sample_15-sample_16-sample_17-sample_18-sample_19-sample_20	51.669971	<0.001000	Y	Bacteria(100)-Firmicutes(100)-Clostridia(100)-Clostridiales(100)-Lachnospiraceae(100)-Syntrophococcus(91)-	Cat 13	0.000212939	0.000511794	0.000253438
Otu0420	Otu0420	24	sample_41-sample_42-sample_43-sample_44-sample_45-sample_46-sample_47-sample_49-sample_50	51.351349	<0.001000	Y	Bacteria(100)-Firmicutes(100)-Clostridia(100)-Clostridiales(100)-Lachnospiraceae(100)-Clostridium_XlVb(100)-	Cat 14	4.15567e-05	7.02038e-05	0.000116783
Otu0896	Otu0896		sample_11-sample_12-sample_13-sample_14-sample_15-sample_16-sample_17-sample_18-sample_19-sample_20	51.287025	<0.001000	N
Otu0976	Otu0976		sample_41-sample_42-sample_43-sample_44-sample_45-sample_46-sample_47-sample_49-sample_50	51.195503	<0.001000	N
Otu0892	Otu0892	24	sample_41-sample_42-sample_43-sample_44-sample_45-sample_46-sample_47-sample_49-sample_50	50.855045	<0.001000	Y	Bacteria(100)-Firmicutes(100)-Clostridia(100)-Clostridiales(100)-Clostridiales_Incertae_Sedis_XIII(100)-Anaerovorax(100)-	Cat 10	0.000189025	0	0.000248343
Otu0092	Otu0092		sample_41-sample_42-sample_43-sample_44-sample_45-sample_46-sample_47-sample_49-sample_50	49.833035	<0.001000	N
Otu0647	Otu0647		sample_41-sample_42-sample_43-sample_44-sample_45-sample_46-sample_47-sample_49-sample_50	49.689442	<0.001000	N
Otu0098	Otu0098	24	sample_41-sample_42-sample_43-sample_44-sample_45-sample_46-sample_47-sample_49-sample_50	49.353577	<0.001000	Y	Bacteria(100)-Firmicutes(100)-Clostridia(100)-Clostridiales(100)-Ruminococcaceae(100)-Sporobacter(100)-	Cat 15	0.00108272	0.000718583	0.00165811
Otu0813	Otu0813		sample_41-sample_42-sample_43-sample_44-sample_45-sample_46-sample_47-sample_49-sample_50	49.28862	<0.001000	N
Otu0529	Otu0529		sample_41-sample_42-sample_43-sample_44-sample_45-sample_46-sample_47-sample_49-sample_50	48.720066	<0.001000	N
Otu0135	Otu0135		sample_41-sample_42-sample_43-sample_44-sample_45-sample_46-sample_47-sample_49-sample_50	46.519527	<0.001000	N
Otu0821	Otu0821		sample_11-sample_12-sample_13-sample_14-sample_15-sample_16-sample_17-sample_18-sample_19-sample_20	45.715691	<0.001000	N
Otu0054	Otu0054		sample_41-sample_42-sample_43-sample_44-sample_45-sample_46-sample_47-sample_49-sample_50	45.393486	<0.001000	N
Otu0594	Otu0594		sample_11-sample_12-sample_13-sample_14-sample_15-sample_16-sample_17-sample_18-sample_19-sample_20	40	<0.001000	N
Otu1074	Otu1074		sample_41-sample_42-sample_43-sample_44-sample_45-sample_46-sample_47-sample_49-sample_50	38.647343	<0.001000	N
LEGEND
1	0	-1	Cat 9				THE RED TEXT ARE THE ONES THAT ARE UNIQUE		0.00349856	0.00908435	0.0051581
-1	0	1	Cat 10
1	0	0	Cat 13
0	1	0	Cat 14
0	0	1	Cat 15
-1	0	0	Cat 16
0	0	-1	Cat 18
Otu0834	24		94.370415	<0.001000	Bacteria(100)-Firmicutes(100)-Clostridia(100)-Clostridiales(100)-Lachnospiraceae(100)-Coprococcus(100)-	Cat 15
Otu0126	24		86.619255	<0.001000	Bacteria(100)-Firmicutes(100)-Clostridia(100)-Clostridiales(100)-Lachnospiraceae(100)-Clostridium_XlVa(100)-	Cat 15
Otu0274	24		83.018867	<0.001000	Bacteria(100)-Firmicutes(100)-Clostridia(100)-Clostridiales(100)-Lachnospiraceae(100)-Johnsonella(100)-	Cat 15
Otu0728	8		82.913383	<0.001000	Bacteria(100)-Firmicutes(100)-Clostridia(100)-Clostridiales(100)-Lachnospiraceae(100)-Lachnospiracea_incertae_sedis(100)-	Cat 16
Otu0499	24		81.720993	<0.001000	Bacteria(100)-Firmicutes(100)-Clostridia(100)-Clostridiales(100)-Lachnospiraceae(100)-Lachnospiracea_incertae_sedis(100)-	Cat 10
Otu0954	24		77.777779	<0.001000	Bacteria(100)-Proteobacteria(100)-Betaproteobacteria(100)-Burkholderiales(100)-Sutterellaceae(100)-Sutterella(100)-	Cat 15
Otu0638	8		76.736839	<0.001000	Bacteria(100)-Proteobacteria(100)-Alphaproteobacteria(100)-Rickettsiales(100)-Rickettsiaceae(100)-Orientia(100)-	Cat 16
Otu0143	24		74.694687	<0.001000	Bacteria(100)-Firmicutes(100)-Clostridia(100)-Clostridiales(100)-Lachnospiraceae(100)-unclassified-	Cat 15
Otu1145	8		74.306053	<0.001000	Bacteria(100)-Firmicutes(100)-Clostridia(100)-Clostridiales(100)-Ruminococcaceae(100)-Clostridium_III(100)-	Cat 16
Otu0979	24		72.618073	<0.001000	Bacteria(100)-Firmicutes(100)-Clostridia(100)-Clostridiales(100)-Ruminococcaceae(100)-Butyricicoccus(100)-	Cat 15
Otu0809	24		71.884445	<0.001000	Bacteria(100)-Firmicutes(100)-Clostridia(100)-Clostridiales(100)-Lachnospiraceae(100)-Lachnobacterium(100)-	Cat 10
Otu0371	24		71.350166	<0.001000	Bacteria(100)-Proteobacteria(100)-Alphaproteobacteria(100)-Rhizobiales(100)-Hyphomicrobiaceae(100)-Gemmiger(100)-	Cat 15
Otu0482	8		70.85199	<0.001000	Bacteria(100)-Firmicutes(100)-Clostridia(100)-Clostridiales(100)-Lachnospiraceae(100)-Lachnobacterium(53)-	Cat 15
Otu0599	24		69.720306	<0.001000	Bacteria(100)-Firmicutes(100)-Clostridia(100)-Clostridiales(100)-Lachnospiraceae(100)-Clostridium_XlVa(100)-	Cat 15
Otu0560	18		69.324326	<0.001000	Bacteria(100)-Firmicutes(100)-Clostridia(100)-Clostridiales(100)-Clostridiaceae_4(100)-Thermotalea(92)-	Cat 13
Otu0212	24		67.911713	<0.001000	Bacteria(100)-Firmicutes(100)-Clostridia(100)-Clostridiales(100)-Ruminococcaceae(100)-Faecalibacterium(100)-	Cat 15
Otu0435	24		66.458984	<0.001000	Bacteria(100)-Firmicutes(100)-Clostridia(100)-Clostridiales(100)-Lachnospiraceae(100)-Clostridium_XlVa(100)-	Cat 15

## Sheet: CorrOTUSoma
	Otu0914	Otu0177	Otu0630	Otu0874	Otu1008	Otu1166	Otu0134	Otu0319	Otu0557	Otu0420	Otu0018	Otu0126	Otu0143	Otu0207	Otu0212	Otu0222	Otu0274	Otu0371	Otu0426	Otu0435	Otu0486	Otu0599	Otu0616	Otu0705	Otu0726	Otu0733	Otu0834	Otu0954	Otu0962	Otu0979	Otu1039	Otu1094	Otu1104	Otu1133	Otu1137	Otu1180	Otu0595	Otu0638	Otu0728	Otu0829	Otu1145	Otu0128	Otu0269	Otu0299	Otu0761	Otu0875	Otu0959	Otu1102
XEDAR	0	0	-0.104593	0	0	0	0	0.559609	0.622832	0.540681	0.352618	0.331908	0.252329	0	0.331866	0.190316	0.425881	0.379117	0.301633	0.422433	0	0.354618	0.399398	0	-0.0483627	0.351801	0.26912	0.592986	0.304427	0.441843	0.11876	0	0.324443	0.355025	0.520238	0.461914	-0.442245	-0.664459	-0.594527	0	-0.545528	-0.150817	-0.325141	-0.362886	-0.312319	-0.344986	0	0
ASAH2	0	0	0.0951875	0	0	0	0	0.571429	0.362651	0.545788	0.406593	0.479927	0.37752	0.466422	0.506845	0.257789	0.667512	0.581754	0.383394	0.497369	0	0.429886	0.457529	0	0.23125	0.522347	0.538158	0.73508	0.460693	0.56927	0.212454	0	0.372635	0.517902	0.540012	0.538462	-0.207458	-0.538954	-0.389815	0	-0.39559	-0.403541	-0.514652	-0.458055	-0.484127	-0.649573	-0.393973	-0.449099
PTH	0	0	0.0336718	0	0	0	0	0.64652	0.42208	0.490842	0.261294	0.376431	0.257178	0.418193	0.411599	0.16799	0.652734	0.521742	0.397436	0.441119	0	0.22719	0.365777	0	0.135855	0.395761	0.402961	0.627353	0.403297	0.558722	0.0927961	0	0.328104	0.465734	0.382407	0.415751	-0.364853	-0.642518	-0.443561	0	-0.432467	-0.261905	-0.412088	-0.406616	-0.490232	-0.565324	0	0
NR1D1	0	0	-0.130154	0	0	0	0	0.654457	0.598453	0.534799	0.351648	0.359945	0.287111	0.443223	0.400776	0.161882	0.554824	0.514393	0.449328	0.516119	0	0.355789	0.536966	0	0.151974	0.338652	0.396053	0.703396	0.398412	0.503068	0.118437	0	0.290068	0.480855	0.485645	0.482906	-0.263695	-0.677039	-0.551699	0	-0.548462	-0.338828	-0.32967	-0.461729	-0.291209	-0.409035	0	0
GDF-11	0	0	-0.0271964	0	0	0	0	-0.566545	-0.556916	-0.614164	-0.321123	-0.536407	-0.27245	0	-0.286357	-0.328039	-0.495092	-0.505208	-0.208791	-0.413816	0	-0.389469	-0.221067	0	-0.0917763	-0.463419	-0.377632	-0.626165	-0.446344	-0.544172	-0.0927961	0	-0.27677	-0.372739	-0.507636	-0.480464	0.460523	0.554454	0.491478	0	0.425762	0.255189	0.459707	0.34844	0.382173	0.489621	0	0
AMNLS	0	0	0.0686386	0	0	0	0	0.675214	0.425276	0.518926	0.242979	0.443291	0.396457	0.45116	0.300273	0.173488	0.570218	0.470915	0.459096	0.546711	0	0.197796	0.358388	0	0.175329	0.440139	0.506579	0.725575	0.440543	0.579455	0.0897436	0	0.30553	0.450613	0.451436	0.474969	-0.404287	-0.466389	-0.510257	0	-0.339269	-0.468864	-0.450549	-0.51868	-0.382173	-0.554335	-0.505609	-0.546317
IGF-I sR	0	-0.579454	-0.462339	0	0	-0.671492	0	-0.0805861	0.13835	-0.39072	-0.459707	-0.742787	-0.335981	0	-0.4317	-0.441662	-0.567755	-0.600738	-0.153846	-0.459869	-0.665127	-0.43111	-0.219836	-0.493482	-0.5375	-0.573999	-0.468421	-0.519626	-0.544344	-0.634018	-0.424908	-0.526336	-0.452419	-0.480855	-0.547343	-0.537851	-0.025718	0.0140903	0	0	0	0.534799	0.680098	0.462341	0.311966	0.71978	0.545191	0.428921
G-CSF-R	0	0	-0.237645	0	0	0	0	0.687424	0.595897	0.528694	0.237485	0.211265	0.118509	0.459096	0.338	0.12584	0.562829	0.454993	0.334554	0.329276	0	0.199021	0.419351	0	0.125987	0.207338	0.300658	0.506556	0.340711	0.373936	0.025641	0	0.254196	0.347789	0.287721	0.407204	-0.336048	-0.77074	-0.562059	0	-0.617523	-0.17094	-0.25641	-0.35885	-0.366911	-0.336996	0	0
ABL1	0	0	-0.0718762	0	0	0	0	0.672772	0.577365	0.486569	0.311355	0.2363	0.263897	0	0.432628	0.267563	0.598544	0.44397	0.420024	0.359211	0	0.198409	0.416272	0	0.132566	0.332468	0.403619	0.545369	0.396275	0.370662	0.150794	0	0.295016	0.390884	0.378131	0.413919	-0.374111	-0.694652	-0.509609	0	-0.496164	-0.224664	-0.274115	-0.368648	-0.425519	-0.416972	0	0
SAA	0	0	-0.195585	0	0	0	0	0.634102	0.558759	0.572432	0.246375	0.29542	0.163128	0.443291	0.265678	0.131969	0.50379	0.425358	0.375515	0.343145	0	0.271323	0.371992	0	0.175849	0.187724	0.323734	0.55694	0.313588	0.408009	0.0192337	0	0.198872	0.453328	0.365053	0.3804	-0.384285	-0.729989	-0.535916	0	-0.508645	-0.187758	-0.229889	-0.319095	-0.304992	-0.314456	0	0
TNF-b	0	0	-0.0647534	0	0	0	0	0.643468	0.577046	0.499389	0.283883	0.230194	0.103849	0	0.372326	0.243739	0.519108	0.352727	0.330281	0.341118	0	0.173301	0.411961	0	0.0819079	0.280452	0.289474	0.49705	0.271104	0.370662	0.0732601	0	0.278935	0.386348	0.38424	0.338828	-0.480412	-0.686198	-0.529035	0	-0.558519	-0.192308	-0.263736	-0.290265	-0.326007	-0.330281	0	0
HPG-	0	0	-0.0773921	0	0	0	0	0.622195	0.468961	0.329415	0.188368	0.147786	0.273713	0	0.198408	0.0504048	0.31102	0.206401	0.350786	0.530673	0	0.184046	0.409868	0	-0.0386572	0.288862	0.220593	0.608237	0	0.473858	-0.0824302	0	0.340371	0.418922	0.50863	0.264692	-0.469511	-0.577791	-0.612013	0	-0.513004	-0.0714395	-0.177378	-0.236106	-0.204244	0	0	0
IL-20 Ra	0	0	-0.1642	0	0	0	0	0.681221	0.467275	0.518168	0.212824	0.256528	0.161931	0.507481	0.279639	0.0614116	0.54175	0.383769	0.464122	0.421675	0	0.175192	0.372665	0	0.114015	0.180839	0.356852	0.532858	0.437166	0.397156	-0.0140458	0	0.266956	0.380793	0.208677	0.32	-0.316599	-0.676541	-0.460213	0	-0.480554	-0.268702	-0.321221	-0.386525	-0.343206	-0.402443	0	0
HPLN1	0	0	0.245453	0.511954	0	0	0	-0.725385	-0.580969	-0.523279	-0.110823	-0.0812214	-0.045517	0	-0.123715	-0.0516267	-0.284229	-0.300415	-0.0879255	-0.471618	0	0	-0.106547	0	0.135218	-0.0552986	0	-0.419685	-0.167328	-0.341614	0.163639	0	-0.274648	-0.341792	-0.217504	-0.332163	0.472254	0.749719	0.662204	0	0.610911	0.06167	0.10777	0.261829	0.0561746	0.29339	0	0
CD48	0	0	0.0832335	0	0	0	0	-0.694351	-0.58681	-0.33313	-0.130992	-0.225073	-0.272533	0	-0.200294	-0.162542	-0.218055	-0.234304	-0.228702	-0.3353	0	-0.184687	-0.328006	0	0.18147	-0.414985	-0.163866	-0.476007	-0.331806	-0.290908	0.145649	0	-0.133169	-0.240879	-0.397495	-0.23542	0.504741	0.551804	0.61243	0.40543	0.519119	0.337405	0.134656	0	0.0439695	0.294046	0	0
COMMD7	0	0	0.0181309	0	0	0	0	0.394383	0.286925	-0.0824176	-0.0671551	-0.0122119	0.147221	-0.493284	-0.039892	0.0922419	0	0.0385795	-0.195971	0.164145	0	0	0	0	-0.16875	0.244804	-0.127961	0.159611	-0.130972	0.126585	-0.134921	0	0.0983385	0	0.394014	0.0665446	-0.481784	-0.252921	-0.450683	-0.562987	-0.28697	0.148962	-0.0757021	0	-0.0604396	0	0	0
Karyopherin-a2	0	0	-0.0349668	-0.533568	0	0	0	0.532357	0.440612	0.150794	0.100733	-0.039078	0.35675	0	0.194203	0.189371	0	0.0796085	0.229548	0.20625	0	0	0	0	-0.153618	0.0752965	0.203947	0.335459	0.172798	0	-0.0128205	0	0.118748	0.267646	0.368968	0.233822	-0.470125	-0.471321	-0.508314	0	-0.280936	0.019536	0.0335775	0	-0.162393	0	0	0
IL-18 BPa	0	0	-0.343245	0	-0.621161	0	0.595329	0.520531	0.585123	0.135247	-0.167608	-0.236336	-0.146632	0	-0.0371145	-0.0299374	0	-0.0419539	0.0485422	0.0481982	0	0	0	0	-0.540543	-0.152435	0	0.125569	-0.237557	0	-0.254923	0	-0.156809	0	-0.112112	-0.0497634	-0.339529	-0.463642	-0.538506	0	-0.555252	0.106854	0.196001	0	-0.105938	0	0	0
Aminoacylase-1	0	0	-0.163178	-0.646239	0	0	0	0.467033	0.295552	0.164835	0.0732601	-0.196611	0.0415394	0	0.0439122	0.0543678	0	-0.031231	0.0592186	0.224671	0	0	0	0	-0.0888158	-0.166598	0	0.133471	0	0	-0.047619	0	0.163898	0.242696	0.276726	0.161783	-0.426576	-0.551636	-0.455216	0	-0.361395	-0.040293	0.0659341	0	0.0512821	0	0	0
FGFR-3	0	0	-0.115944	0	0	0	0	0.419542	0.334156	0.181069	0.100153	0.0400061	0.19615	0	0.147708	0.0415521	0.387756	0.100766	0.175267	0.304534	0	0	0.130587	0	0.0473829	0.309101	0.174889	0.453623	0	0.197031	0.0870229	0	0.216999	0.244661	0.472655	0.261679	-0.300135	-0.485912	-0.496486	-0.424766	-0.310868	-0.209771	-0.203969	0	-0.485191	0	-0.407704	0
CHST2	0	0	0.0191052	-0.486372	0	0	0	0.448481	0.355675	0.287284	0.243016	-0.100458	0.0669009	0	0.347794	0.261188	0.323953	0.163528	0.0998321	0.233588	0	0	0.0708262	0	-0.063332	0.112416	0.159399	0.193701	0.116336	0	0.187147	0	0.218203	0.148589	0.273408	0.336437	-0.291515	-0.398112	-0.356522	0	-0.37855	-0.172493	-0.0146543	0	-0.206991	0	0	0
TXD12	0	0	-0.249948	-0.594436	0	0	0	0.663004	0.540301	0.395604	0.130647	-0.0989162	-0.0323763	0	0.107616	0.13317	0.231536	0.107778	0.111111	0.332237	0	0	0.141015	0	-0.160197	-0.0629289	0	0.236445	0	0	-0.119048	0	0.1874	0.147432	0.274893	0.300366	-0.517789	-0.619974	-0.623575	-0.430707	-0.642331	-0.0763126	0.0671551	0	-0.047619	0	0	0
ATP synthase beta chain	0	0	0.139867	0	0	0	0	0.393162	0.255932	0.392552	0.322955	0.317203	0.464875	0	0.327177	0.333537	0.386098	0.292714	0.327228	0.338487	0	0.377834	0.21922	0	0.200658	0.431409	0.55	0.638838	0.22073	0.335378	0.15873	0	0.185235	0.426419	0.609041	0.410867	-0.297643	-0.348735	-0.350963	0	-0.187738	-0.307692	-0.327228	0	-0.40293	-0.364469	-0.450873	-0.440539
Siglec-6	0	0	0.179367	0	0	0	0	0.376679	0.269352	0.357753	0.331502	0.246069	0.2865	0.506105	0.48458	0.267563	0.554208	0.444583	0.396215	0.168421	0	0.249236	0.319593	0	0.191776	0.427044	0.500658	0.432493	0.29858	0.267357	0.343712	0	0.106997	0.276719	0.265119	0.3663	-0.105272	-0.306464	-0.176777	0	-0.160247	-0.346154	-0.277167	-0.290877	-0.517094	-0.394994	0	-0.47325
MMP-3	0	0	-0.0537535	0	0	0	0	0.427721	0.151474	0.509235	0.243627	0.397557	0.0354361	0	0.393723	0.288682	0.676237	0.459656	0.390475	0.366997	0	0	0.46499	0	0.303665	0.171353	0.273397	0.458505	0.394809	0.491685	0.0867043	0	0.3996	0.395481	0.35375	0.383148	-0.34656	-0.489713	-0.38016	0	-0.396321	-0.292169	-0.441154	-0.451081	-0.330942	-0.494581	0	-0.371197
C5a	0	0	-0.119794	0	0	0	0	0.509158	0.293316	0.582418	0.181929	0.238132	0.134392	0.466422	0.209665	-0.0757483	0.474771	0.29945	0.465201	0.394408	0	0.131048	0.35223	0	0.0618421	0.238621	0.340461	0.569133	0.181957	0.44414	-0.0494505	0	0.198223	0.312254	0.318265	0.349206	-0.460523	-0.57418	-0.501191	0	-0.437831	-0.285714	-0.343712	-0.315372	-0.354701	-0.335165	-0.465716	-0.388872
sRANKL	0	0	0.146343	0	0	0	0	0.346764	0.326545	0.455433	0.347985	0.354755	0.266341	0	0.395519	0.284056	0.448293	0.455605	0.186203	0.233553	0	0.351502	0.230304	0	0.0743421	0.474331	0.392434	0.449524	0.189589	0.358659	0.253358	0	0.0930814	0.198088	0.40562	0.434066	-0.245178	-0.322668	-0.254481	0	-0.272219	-0.257021	-0.3663	-0.222291	-0.376679	-0.454212	0	-0.420667
RET	0	0	0.23707	0	0	0	0	0.147786	0.103395	0.386565	0.300153	0.474424	0.228231	0	0.335474	0.221509	0.425022	0.451763	0.100763	0.203681	0	0.422054	0.124735	0	0.151527	0.471201	0.381202	0.446095	0.211941	0.44937	0.24	0	0.165804	0.292685	0.35747	0.384122	-0.0538528	-0.193096	0	0	0	-0.27084	-0.426565	0	-0.425954	-0.575878	0	0
IGFBP-7	0	0	0.0984251	0	0	0	0	0.263736	0.372556	0.288156	0.266789	0.156617	0.113012	0	0.365832	0.339646	0.303583	0.353951	0.114164	0.0309211	0	0.255359	0.161952	0	-0.0657895	0.30155	0.250658	0.216247	0	0.103669	0.259463	0	-0.0516432	0	0.292608	0.31685	-0.261295	-0.216991	-0.207211	0	-0.329211	-0.125153	-0.210012	0	-0.227106	0	0	-0.359829
IL-17 RD	0	0	0.203388	0	0	0	0	0.301985	0.344863	0.463511	0.432672	0.523133	0.266117	0.577099	0.511795	0.510846	0.595031	0.570599	0.307176	0.256986	0	0.4487	0.316303	0	0.353068	0.511044	0.567937	0.522557	0.450603	0.421352	0.370076	0	0.214833	0.230291	0.470211	0.536183	-0.133774	-0.229037	0	0	-0.267943	-0.432977	-0.50626	-0.384075	-0.417099	-0.487328	-0.421933	-0.465291
DMP1	0	0	-0.159293	0	0	0	0	0.557387	0.426873	0.557998	0.302198	0.296749	0.21686	0.433455	0.278007	0.244349	0.485855	0.472139	0.415751	0.30329	0	0.427436	0.366393	0	0.188487	0.177874	0.380263	0.502991	0.312319	0.349201	0.0225885	0	0.102977	0.378031	0.262065	0.343712	-0.224947	-0.629132	-0.396291	0	-0.399613	-0.105006	-0.192308	-0.257809	-0.360806	0	0	0
Nucleoside diphosphate kinase A	0	0	0.0543928	0	0	0	0	0.503053	0.321113	0.562271	0.284493	0.491833	0.158827	0	0.297799	0.239462	0.616402	0.462341	0.392552	0.589474	0	0.143908	0.402724	0.484765	0.246711	0.287	0.273026	0.593292	0.307739	0.674394	0.0958486	0	0.442523	0.467246	0.484423	0.506716	-0.445436	-0.468503	-0.424782	0	-0.397601	-0.349817	-0.37851	-0.473977	-0.2442	-0.539072	-0.385932	-0.39193
PSA2	0	0	0.185279	0	0	0	0	0.259276	0.204744	0.210719	0.184456	0.291234	0.359358	0	0.475985	0.374943	0.433096	0.30357	0.421438	0.0844137	0	0.147343	0.215932	0	0.122589	0.353546	0.473079	0.41387	0.348198	0.339717	0.254085	0	0.249981	0.14523	0.440947	0.427852	-0.384746	-0.176914	-0.275328	0	-0.196879	-0.307833	-0.338678	-0.377394	-0.386624	-0.417468	-0.531983	-0.441964
CBX5	0	0	0.0178126	0	0	0	0	0.280916	0.282378	0.465344	0.295573	0.216674	0.169264	0	0.357901	0.293309	0.487852	0.41164	0.248855	0.12619	0	0.18193	0	0	0.154817	0.241059	0.353397	0.332194	0.162773	0.208311	0.344733	0	0.0683631	0.138402	0.367858	0.454351	-0.315399	-0.398877	-0.292451	0	-0.214623	-0.181679	-0.309008	-0.209495	-0.447328	-0.295878	-0.406002	-0.36575
CASA	0	0	-0.0148955	0	0	0	0	0.412761	0.582407	0.445428	0.280568	0.0876336	0.0846189	0.417036	0.282071	0.215366	0.377843	0.291534	0.117845	0.0832364	0	0.151279	0.149043	0	0.0225363	0.314511	0.305474	0.267973	0.170076	0.104958	0.199054	0	0.0671155	0	0.195509	0.396581	-0.285856	-0.429115	-0.324464	0	-0.404033	-0.135247	-0.121203	0	-0.415509	0	0	0
ARTS1	0	0	0.2257	0	0	0	0	0.252175	0.306622	0.341627	0.306823	0.334656	0.192455	0.438712	0.385837	0.260577	0.455136	0.36748	0.23111	0.215822	0	0.347575	0.159821	0	0.0787949	0.447482	0.42819	0.448206	0.123817	0.353438	0.283926	0	0.104075	0.166359	0.314342	0.387422	-0.167707	-0.239572	0	0	-0.209896	-0.238742	-0.400855	-0.235493	-0.481453	-0.381926	-0.39326	-0.49442
TNFSF15	0	0	0.0563354	0	0	0	0	0.392552	0.166468	0.327839	0.300977	0.566631	0.285889	0	0.349133	0.213806	0.578839	0.485612	0.407204	0.681579	0	0.297613	0.521571	0.60076	0.384211	0.264447	0.371382	0.64874	0.502519	0.691127	0.154457	0.470685	0.628377	0.506562	0.504582	0.478632	-0.108358	-0.334645	-0.228579	0	-0.323177	-0.369963	-0.643468	-0.705453	-0.120269	-0.703907	0	0
VEGF121	0	0	0.149302	0	0	0	0	-0.00732824	-0.0934869	0.421374	0.305038	0.334708	0.387107	0.608244	0.210193	0.0534678	0.197728	0.196938	0.408244	0.356523	0	0.491273	0.114879	0.476865	0.297953	0.226322	0.659906	0.562571	0.24645	0.428993	0.164886	0	0.375687	0.288904	0.28506	0.577099	0.0900404	-0.0521501	0	0	0	-0.465344	-0.39542	-0.41409	-0.254046	-0.385649	-0.519374	-0.403976
Hemoglobin	-0.570827	0	0.404061	0.584723	0	0	0	-0.628816	-0.517616	-0.21978	0	0.253091	-0.100794	0	-0.0624666	0.0623091	-0.214294	-0.175751	-0.115995	-0.205263	0	0.156155	-0.134241	0	0.202303	0.0683852	0	-0.162779	0	0	0.12149	0	-0.0330888	0	-0.277337	-0.229548	0.360738	0.592497	0.647534	0.506752	0.580645	-0.0689866	-0.313797	0	0.0525031	0	0	0
DR3	0	0	0.195555	0	0	0	0	-0.616606	-0.522728	-0.394383	-0.23138	-0.20058	-0.181429	0	-0.192038	-0.248015	-0.542508	-0.575018	-0.0537241	-0.319408	0	-0.132885	-0.389177	0	-0.1375	-0.31901	0	-0.431305	-0.107159	-0.277178	-0.10928	0	-0.120295	-0.338716	-0.406231	-0.366911	0.266438	0.707333	0.586666	0.478635	0.457275	0.0372405	0.190476	0.253522	0.392552	0.283272	0	0
MIA	0	0	-0.0181309	0	0	0	0	-0.496947	-0.376709	-0.504884	-0.327228	-0.472294	-0.340257	0	-0.270895	-0.374466	-0.435361	-0.575018	-0.120879	-0.457566	0	-0.360688	-0.237078	0	-0.264145	-0.292092	-0.306908	-0.559231	-0.395359	-0.54599	-0.123321	-0.581316	-0.428917	-0.548145	-0.570556	-0.54823	0.357309	0.602361	0.447446	0	0.352008	0.166056	0.37851	0.430498	0.177045	0.552503	0	0
WIF-1	0	0	0.0867695	0	0	0	0	-0.503663	-0.294274	-0.398657	-0.14652	-0.308045	-0.276115	0	-0.101122	-0.11179	-0.401493	-0.234539	-0.325397	-0.619737	0	0	-0.24262	0	-0.196382	-0.185149	-0.294408	-0.581806	-0.361166	-0.519073	0.0854701	0	-0.548902	-0.427931	-0.398901	-0.424908	0.338449	0.475548	0.444208	0	0.357372	0.242369	0.323565	0.458055	0.17094	0.437118	0	0
contactin-1	0	0	-0.029139	0	0	0	0	-0.503053	-0.417927	-0.594017	-0.343712	-0.415204	-0.171655	0	-0.201625	-0.192425	-0.361467	-0.489286	-0.181319	-0.567434	0	-0.274955	-0.30112	0	-0.0898027	-0.379756	-0.239145	-0.565964	-0.272935	-0.626379	-0.0555556	-0.561872	-0.441596	-0.386348	-0.486866	-0.51221	0.434805	0.571362	0.488888	0	0.500857	0.333944	0.395604	0.344153	0.150794	0.485348	0	0
IL-1b	0	0	-0.263546	0	0	0	0	-0.482295	-0.552123	-0.228938	-0.274115	-0.384979	-0.32132	0	-0.328104	-0.455101	-0.441519	-0.401717	-0.205739	-0.299342	0	-0.191673	-0.199515	0	-0.166447	-0.484516	-0.339145	-0.404769	-0.409403	-0.306278	-0.315018	0	-0.219561	-0.282011	-0.411118	-0.35348	0.279126	0.219104	0.214981	0	0.181033	0.312576	0.235043	0.363749	0.23199	0.405983	0	0
WISP-1	0	0	-0.0271964	0	0	0	0	-0.62149	-0.4224	-0.411477	-0.278388	-0.297359	-0.486866	-0.429792	-0.426134	-0.130116	-0.46184	-0.38702	-0.513431	-0.417105	0	-0.338642	-0.403956	0	-0.025329	-0.443049	-0.511842	-0.686761	-0.394138	-0.42668	-0.0903541	0	-0.182452	-0.393152	-0.458766	-0.417582	0.306215	0.501615	0.483708	0	0.354019	0.371184	0.309524	0.385795	0.362027	0.437729	0	0.394681
TSP4	0	0	-0.282325	0	0	0	0	-0.301587	-0.169663	-0.489621	-0.385226	-0.415509	-0.477092	0	-0.258216	-0.276115	-0.345456	-0.481325	-0.184982	-0.420724	0	-0.366199	0	0	-0.161842	-0.499066	-0.376316	-0.489129	-0.341627	-0.395034	-0.242979	0	-0.167608	-0.374251	-0.562615	-0.474969	0.261638	0.205014	0.198793	0	0	0.257631	0.208791	0	0.213675	0.413309	0	0
DKK1	0	0	0.112023	0	0	0	0	-0.492674	-0.322711	-0.349206	-0.0634921	-0.169745	-0.0623091	0	-0.0807118	-0.0800244	-0.205057	-0.218005	-0.117216	-0.42204	0	0	0	0	0.044079	-0.00800252	0	-0.30932	-0.22134	-0.402672	0.101343	0	-0.467263	-0.22455	-0.366524	-0.41514	0.599743	0.555863	0.518027	0	0.521642	0.195971	0.257021	0.337417	-0.0830281	0.398657	0	0
Carbonic anhydrase 9	0	0	-0.116574	0	0	0	0	-0.572126	-0.459374	-0.588002	-0.352007	-0.507176	-0.481136	-0.435048	-0.287792	-0.187261	-0.463758	-0.551526	-0.512288	-0.506492	0	-0.497323	-0.407097	-0.50831	-0.19197	-0.461307	-0.512907	-0.732419	-0.427023	-0.616834	-0.109907	0	-0.223151	-0.592465	-0.432259	-0.457029	0.226867	0.435457	0.366236	0	0.239067	0.357808	0.16425	0.402697	0.289116	0.477484	0	0
MATK	0	0	-0.0712396	0	0	0	0	-0.606014	-0.717423	-0.380705	-0.255228	-0.223969	-0.132885	0	-0.369908	-0.199175	-0.436351	-0.421683	-0.184705	-0.31518	0	-0.154954	-0.382462	0	0.0931063	-0.518242	-0.233259	-0.435728	-0.308244	-0.293956	-0.162723	0	-0.155108	-0.209083	-0.301818	-0.256755	0.310206	0.394237	0.41578	0	0.49188	0.233247	0.162113	0.302558	0.204549	0.346512	0	0
Factor B	0	0	-0.178747	0	0	0	0	-0.570905	-0.228649	-0.414288	-0.297054	-0.469313	-0.350695	0	-0.29738	-0.207729	-0.439739	-0.487523	-0.154786	-0.591209	0	-0.28051	-0.304861	0	-0.139166	-0.469674	-0.28228	-0.548225	-0.431908	-0.572632	-0.0552587	0	-0.406559	-0.418922	-0.510768	-0.42192	0.348103	0.380496	0.360731	0	0.301097	0.2882	0.487559	0.433932	0.128835	0.604488	0	0
Protein disulfide-isomerase	0	0	-0.267472	0	0	0	0	-0.315372	-0.316848	-0.362387	-0.410014	-0.377405	-0.504048	0	-0.52548	-0.329922	-0.447745	-0.518759	-0.381316	-0.26106	0	-0.468537	-0.272219	0	-0.11334	-0.609376	-0.586109	-0.603682	-0.443969	-0.378723	-0.369409	0	-0.139025	-0.321375	-0.4958	-0.402687	0.127238	0.216319	0.236062	0	0	0.263777	0.363303	0.330732	0.493055	0.368493	0	0.399022
Epithelial cell kinase	0	0	0.0126327	0	0	0	0	-0.521606	-0.231116	-0.586655	-0.385708	-0.430513	-0.17479	-0.411666	-0.381623	-0.171429	-0.581877	-0.6488	-0.334097	-0.601098	0	-0.29101	-0.584957	0	-0.207825	-0.308966	-0.332389	-0.59396	-0.441814	-0.476004	-0.119102	-0.520204	-0.22554	-0.472755	-0.31505	-0.380211	0.0358501	0.419026	0.33752	0	0.355188	0.456253	0.433043	0.502988	0.135288	0.539319	0	0.429118
EPHAA	0	0	-0.166118	0	0	0	0	-0.522363	-0.440999	-0.317509	-0.380705	-0.407328	-0.46128	0	-0.493933	-0.368108	-0.548442	-0.566225	-0.243016	-0.313041	0	-0.342369	-0.388928	0	-0.147391	-0.578634	-0.415031	-0.553573	-0.560916	-0.396003	-0.294001	0	-0.324443	-0.412117	-0.565755	-0.454892	0.1461	0.39776	0.326083	0	0.311826	0.348038	0.296138	0.295209	0.44726	0.571211	0	0
Notch 1	0	0	-0.132744	0	0	0	0	-0.470696	-0.236122	-0.34188	-0.230769	-0.486338	-0.390348	0	-0.13854	-0.396457	-0.320209	-0.331294	-0.169719	-0.444408	0	-0.314147	-0.294962	0	-0.278618	-0.497611	-0.421711	-0.55329	-0.33949	-0.377937	-0.0128205	0	-0.238425	-0.287304	-0.529627	-0.396215	0.330562	0.243762	0.319882	0	0.234001	0.515873	0.51221	0.389469	0.0641026	0.493284	0.567766	0.428616
PDK1	0	0	-0.0702681	0	0	0	0	-0.528469	-0.434129	-0.525721	-0.425889	-0.44229	-0.164045	0	-0.487438	-0.370246	-0.565378	-0.631453	-0.435659	-0.488397	0	-0.328588	-0.498555	0	-0.0876779	-0.41292	-0.318305	-0.501682	-0.579847	-0.434203	-0.225614	0	-0.296916	-0.230634	-0.435314	-0.425584	0.307977	0.42066	0.342598	0	0.494228	0.428942	0.446344	0.493648	0.12853	0.4784	0	0
Elastase	0	0	-0.0835829	0	0	0	0	-0.401344	-0.338894	-0.507636	-0.394014	-0.37941	-0.158924	0	-0.485805	-0.360636	-0.577961	-0.556374	-0.137447	-0.302487	0	-0.242035	-0.272344	0	-0.145484	-0.502647	-0.295904	-0.389561	-0.494883	-0.354874	-0.285889	0	-0.307264	-0.147522	-0.488998	-0.46854	0.260082	0.333439	0.311006	0	0.405895	0.299939	0.41967	0.270221	0.340257	0.488088	0	0
Formatted
	XEDAR	ASAH2	PTH	NR1D1	GDF-11	AMNLS	IGF-I sR	G-CSF-R	ABL1	SAA	TNF-b	HPG-	IL-20 Ra	HPLN1	CD48	COMMD7	Karyopherin-a2	IL-18 BPa	Aminoacylase-1	FGFR-3	CHST2	TXD12	ATP synthase beta chain	Siglec-6	MMP-3	C5a	sRANKL	RET	IGFBP-7	IL-17 RD	DMP1	Nucleoside diphosphate kinase A	PSA2	CBX5	CASA	ARTS1	TNFSF15	VEGF121	Hemoglobin	DR3	MIA	WIF-1	contactin-1	IL-1b	WISP-1	TSP4	DKK1	Carbonic anhydrase 9	MATK
Otu1102	0	-0.449099	0	0	0	-0.546317	0.428921	0	0	0	0	0	0	0	0	0	0	0	0	0	0	0	-0.440539	-0.47325	-0.371197	-0.388872	-0.420667	0	-0.359829	-0.465291	0	-0.39193	-0.441964	-0.36575	0	-0.49442	0	-0.403976	0	0	0	0	0	0	0.394681	0	0	0	0
Otu0959	0	-0.393973	0	0	0	-0.505609	0.545191	0	0	0	0	0	0	0	0	0	0	0	0	-0.407704	0	0	-0.450873	0	0	-0.465716	0	0	0	-0.421933	0	-0.385932	-0.531983	-0.406002	0	-0.39326	0	-0.519374	0	0	0	0	0	0	0	0	0	0	0
Otu0875	-0.344986	-0.649573	-0.565324	-0.409035	0.489621	-0.554335	0.71978	-0.336996	-0.416972	-0.314456	-0.330281	0	-0.402443	0.29339	0.294046	0	0	0	0	0	0	0	-0.364469	-0.394994	-0.494581	-0.335165	-0.454212	-0.575878	0	-0.487328	0	-0.539072	-0.417468	-0.295878	0	-0.381926	-0.703907	-0.385649	0	0.283272	0.552503	0.437118	0.485348	0.405983	0.437729	0.413309	0.398657	0.477484	0.346512
Otu0761	-0.312319	-0.484127	-0.490232	-0.291209	0.382173	-0.382173	0.311966	-0.366911	-0.425519	-0.304992	-0.326007	-0.204244	-0.343206	0.0561746	0.0439695	-0.0604396	-0.162393	-0.105938	0.0512821	-0.485191	-0.206991	-0.047619	-0.40293	-0.517094	-0.330942	-0.354701	-0.376679	-0.425954	-0.227106	-0.417099	-0.360806	-0.2442	-0.386624	-0.447328	-0.415509	-0.481453	-0.120269	-0.254046	0.0525031	0.392552	0.177045	0.17094	0.150794	0.23199	0.362027	0.213675	-0.0830281	0.289116	0.204549
Otu0299	-0.362886	-0.458055	-0.406616	-0.461729	0.34844	-0.51868	0.462341	-0.35885	-0.368648	-0.319095	-0.290265	-0.236106	-0.386525	0.261829	0	0	0	0	0	0	0	0	0	-0.290877	-0.451081	-0.315372	-0.222291	0	0	-0.384075	-0.257809	-0.473977	-0.377394	-0.209495	0	-0.235493	-0.705453	-0.41409	0	0.253522	0.430498	0.458055	0.344153	0.363749	0.385795	0	0.337417	0.402697	0.302558
Otu0269	-0.325141	-0.514652	-0.412088	-0.32967	0.459707	-0.450549	0.680098	-0.25641	-0.274115	-0.229889	-0.263736	-0.177378	-0.321221	0.10777	0.134656	-0.0757021	0.0335775	0.196001	0.0659341	-0.203969	-0.0146543	0.0671551	-0.327228	-0.277167	-0.441154	-0.343712	-0.3663	-0.426565	-0.210012	-0.50626	-0.192308	-0.37851	-0.338678	-0.309008	-0.121203	-0.400855	-0.643468	-0.39542	-0.313797	0.190476	0.37851	0.323565	0.395604	0.235043	0.309524	0.208791	0.257021	0.16425	0.162113
Otu0128	-0.150817	-0.403541	-0.261905	-0.338828	0.255189	-0.468864	0.534799	-0.17094	-0.224664	-0.187758	-0.192308	-0.0714395	-0.268702	0.06167	0.337405	0.148962	0.019536	0.106854	-0.040293	-0.209771	-0.172493	-0.0763126	-0.307692	-0.346154	-0.292169	-0.285714	-0.257021	-0.27084	-0.125153	-0.432977	-0.105006	-0.349817	-0.307833	-0.181679	-0.135247	-0.238742	-0.369963	-0.465344	-0.0689866	0.0372405	0.166056	0.242369	0.333944	0.312576	0.371184	0.257631	0.195971	0.357808	0.233247
Otu1145	-0.545528	-0.39559	-0.432467	-0.548462	0.425762	-0.339269	0	-0.617523	-0.496164	-0.508645	-0.558519	-0.513004	-0.480554	0.610911	0.519119	-0.28697	-0.280936	-0.555252	-0.361395	-0.310868	-0.37855	-0.642331	-0.187738	-0.160247	-0.396321	-0.437831	-0.272219	0	-0.329211	-0.267943	-0.399613	-0.397601	-0.196879	-0.214623	-0.404033	-0.209896	-0.323177	0	0.580645	0.457275	0.352008	0.357372	0.500857	0.181033	0.354019	0	0.521642	0.239067	0.49188
Otu0829	0	0	0	0	0	0	0	0	0	0	0	0	0	0	0.40543	-0.562987	0	0	0	-0.424766	0	-0.430707	0	0	0	0	0	0	0	0	0	0	0	0	0	0	0	0	0.506752	0.478635	0	0	0	0	0	0	0	0	0
Otu0728	-0.594527	-0.389815	-0.443561	-0.551699	0.491478	-0.510257	0	-0.562059	-0.509609	-0.535916	-0.529035	-0.612013	-0.460213	0.662204	0.61243	-0.450683	-0.508314	-0.538506	-0.455216	-0.496486	-0.356522	-0.623575	-0.350963	-0.176777	-0.38016	-0.501191	-0.254481	0	-0.207211	0	-0.396291	-0.424782	-0.275328	-0.292451	-0.324464	0	-0.228579	0	0.647534	0.586666	0.447446	0.444208	0.488888	0.214981	0.483708	0.198793	0.518027	0.366236	0.41578
Otu0638	-0.664459	-0.538954	-0.642518	-0.677039	0.554454	-0.466389	0.0140903	-0.77074	-0.694652	-0.729989	-0.686198	-0.577791	-0.676541	0.749719	0.551804	-0.252921	-0.471321	-0.463642	-0.551636	-0.485912	-0.398112	-0.619974	-0.348735	-0.306464	-0.489713	-0.57418	-0.322668	-0.193096	-0.216991	-0.229037	-0.629132	-0.468503	-0.176914	-0.398877	-0.429115	-0.239572	-0.334645	-0.0521501	0.592497	0.707333	0.602361	0.475548	0.571362	0.219104	0.501615	0.205014	0.555863	0.435457	0.394237
Otu0595	-0.442245	-0.207458	-0.364853	-0.263695	0.460523	-0.404287	-0.025718	-0.336048	-0.374111	-0.384285	-0.480412	-0.469511	-0.316599	0.472254	0.504741	-0.481784	-0.470125	-0.339529	-0.426576	-0.300135	-0.291515	-0.517789	-0.297643	-0.105272	-0.34656	-0.460523	-0.245178	-0.0538528	-0.261295	-0.133774	-0.224947	-0.445436	-0.384746	-0.315399	-0.285856	-0.167707	-0.108358	0.0900404	0.360738	0.266438	0.357309	0.338449	0.434805	0.279126	0.306215	0.261638	0.599743	0.226867	0.310206
Otu1180	0.461914	0.538462	0.415751	0.482906	-0.480464	0.474969	-0.537851	0.407204	0.413919	0.3804	0.338828	0.264692	0.32	-0.332163	-0.23542	0.0665446	0.233822	-0.0497634	0.161783	0.261679	0.336437	0.300366	0.410867	0.3663	0.383148	0.349206	0.434066	0.384122	0.31685	0.536183	0.343712	0.506716	0.427852	0.454351	0.396581	0.387422	0.478632	0.577099	-0.229548	-0.366911	-0.54823	-0.424908	-0.51221	-0.35348	-0.417582	-0.474969	-0.41514	-0.457029	-0.256755
Otu1137	0.520238	0.540012	0.382407	0.485645	-0.507636	0.451436	-0.547343	0.287721	0.378131	0.365053	0.38424	0.50863	0.208677	-0.217504	-0.397495	0.394014	0.368968	-0.112112	0.276726	0.472655	0.273408	0.274893	0.609041	0.265119	0.35375	0.318265	0.40562	0.35747	0.292608	0.470211	0.262065	0.484423	0.440947	0.367858	0.195509	0.314342	0.504582	0.28506	-0.277337	-0.406231	-0.570556	-0.398901	-0.486866	-0.411118	-0.458766	-0.562615	-0.366524	-0.432259	-0.301818
Otu1133	0.355025	0.517902	0.465734	0.480855	-0.372739	0.450613	-0.480855	0.347789	0.390884	0.453328	0.386348	0.418922	0.380793	-0.341792	-0.240879	0	0.267646	0	0.242696	0.244661	0.148589	0.147432	0.426419	0.276719	0.395481	0.312254	0.198088	0.292685	0	0.230291	0.378031	0.467246	0.14523	0.138402	0	0.166359	0.506562	0.288904	0	-0.338716	-0.548145	-0.427931	-0.386348	-0.282011	-0.393152	-0.374251	-0.22455	-0.592465	-0.209083
Otu1104	0.324443	0.372635	0.328104	0.290068	-0.27677	0.30553	-0.452419	0.254196	0.295016	0.198872	0.278935	0.340371	0.266956	-0.274648	-0.133169	0.0983385	0.118748	-0.156809	0.163898	0.216999	0.218203	0.1874	0.185235	0.106997	0.3996	0.198223	0.0930814	0.165804	-0.0516432	0.214833	0.102977	0.442523	0.249981	0.0683631	0.0671155	0.104075	0.628377	0.375687	-0.0330888	-0.120295	-0.428917	-0.548902	-0.441596	-0.219561	-0.182452	-0.167608	-0.467263	-0.223151	-0.155108
Otu1094	0	0	0	0	0	0	-0.526336	0	0	0	0	0	0	0	0	0	0	0	0	0	0	0	0	0	0	0	0	0	0	0	0	0	0	0	0	0	0.470685	0	0	0	-0.581316	0	-0.561872	0	0	0	0	0	0
Otu1039	0.11876	0.212454	0.0927961	0.118437	-0.0927961	0.0897436	-0.424908	0.025641	0.150794	0.0192337	0.0732601	-0.0824302	-0.0140458	0.163639	0.145649	-0.134921	-0.0128205	-0.254923	-0.047619	0.0870229	0.187147	-0.119048	0.15873	0.343712	0.0867043	-0.0494505	0.253358	0.24	0.259463	0.370076	0.0225885	0.0958486	0.254085	0.344733	0.199054	0.283926	0.154457	0.164886	0.12149	-0.10928	-0.123321	0.0854701	-0.0555556	-0.315018	-0.0903541	-0.242979	0.101343	-0.109907	-0.162723
Otu0979	0.441843	0.56927	0.558722	0.503068	-0.544172	0.579455	-0.634018	0.373936	0.370662	0.408009	0.370662	0.473858	0.397156	-0.341614	-0.290908	0.126585	0	0	0	0.197031	0	0	0.335378	0.267357	0.491685	0.44414	0.358659	0.44937	0.103669	0.421352	0.349201	0.674394	0.339717	0.208311	0.104958	0.353438	0.691127	0.428993	0	-0.277178	-0.54599	-0.519073	-0.626379	-0.306278	-0.42668	-0.395034	-0.402672	-0.616834	-0.293956
Otu0962	0.304427	0.460693	0.403297	0.398412	-0.446344	0.440543	-0.544344	0.340711	0.396275	0.313588	0.271104	0	0.437166	-0.167328	-0.331806	-0.130972	0.172798	-0.237557	0	0	0.116336	0	0.22073	0.29858	0.394809	0.181957	0.189589	0.211941	0	0.450603	0.312319	0.307739	0.348198	0.162773	0.170076	0.123817	0.502519	0.24645	0	-0.107159	-0.395359	-0.361166	-0.272935	-0.409403	-0.394138	-0.341627	-0.22134	-0.427023	-0.308244
Otu0954	0.592986	0.73508	0.627353	0.703396	-0.626165	0.725575	-0.519626	0.506556	0.545369	0.55694	0.49705	0.608237	0.532858	-0.419685	-0.476007	0.159611	0.335459	0.125569	0.133471	0.453623	0.193701	0.236445	0.638838	0.432493	0.458505	0.569133	0.449524	0.446095	0.216247	0.522557	0.502991	0.593292	0.41387	0.332194	0.267973	0.448206	0.64874	0.562571	-0.162779	-0.431305	-0.559231	-0.581806	-0.565964	-0.404769	-0.686761	-0.489129	-0.30932	-0.732419	-0.435728
Otu0834	0.26912	0.538158	0.402961	0.396053	-0.377632	0.506579	-0.468421	0.300658	0.403619	0.323734	0.289474	0.220593	0.356852	0	-0.163866	-0.127961	0.203947	0	0	0.174889	0.159399	0	0.55	0.500658	0.273397	0.340461	0.392434	0.381202	0.250658	0.567937	0.380263	0.273026	0.473079	0.353397	0.305474	0.42819	0.371382	0.659906	0	0	-0.306908	-0.294408	-0.239145	-0.339145	-0.511842	-0.376316	0	-0.512907	-0.233259
Otu0733	0.351801	0.522347	0.395761	0.338652	-0.463419	0.440139	-0.573999	0.207338	0.332468	0.187724	0.280452	0.288862	0.180839	-0.0552986	-0.414985	0.244804	0.0752965	-0.152435	-0.166598	0.309101	0.112416	-0.0629289	0.431409	0.427044	0.171353	0.238621	0.474331	0.471201	0.30155	0.511044	0.177874	0.287	0.353546	0.241059	0.314511	0.447482	0.264447	0.226322	0.0683852	-0.31901	-0.292092	-0.185149	-0.379756	-0.484516	-0.443049	-0.499066	-0.00800252	-0.461307	-0.518242
Otu0726	-0.0483627	0.23125	0.135855	0.151974	-0.0917763	0.175329	-0.5375	0.125987	0.132566	0.175849	0.0819079	-0.0386572	0.114015	0.135218	0.18147	-0.16875	-0.153618	-0.540543	-0.0888158	0.0473829	-0.063332	-0.160197	0.200658	0.191776	0.303665	0.0618421	0.0743421	0.151527	-0.0657895	0.353068	0.188487	0.246711	0.122589	0.154817	0.0225363	0.0787949	0.384211	0.297953	0.202303	-0.1375	-0.264145	-0.196382	-0.0898027	-0.166447	-0.025329	-0.161842	0.044079	-0.19197	0.0931063
Otu0705	0	0	0	0	0	0	-0.493482	0	0	0	0	0	0	0	0	0	0	0	0	0	0	0	0	0	0	0	0	0	0	0	0	0.484765	0	0	0	0	0.60076	0.476865	0	0	0	0	0	0	0	0	0	-0.50831	0
Otu0616	0.399398	0.457529	0.365777	0.536966	-0.221067	0.358388	-0.219836	0.419351	0.416272	0.371992	0.411961	0.409868	0.372665	-0.106547	-0.328006	0	0	0	0	0.130587	0.0708262	0.141015	0.21922	0.319593	0.46499	0.35223	0.230304	0.124735	0.161952	0.316303	0.366393	0.402724	0.215932	0	0.149043	0.159821	0.521571	0.114879	-0.134241	-0.389177	-0.237078	-0.24262	-0.30112	-0.199515	-0.403956	0	0	-0.407097	-0.382462
Otu0599	0.354618	0.429886	0.22719	0.355789	-0.389469	0.197796	-0.43111	0.199021	0.198409	0.271323	0.173301	0.184046	0.175192	0	-0.184687	0	0	0	0	0	0	0	0.377834	0.249236	0	0.131048	0.351502	0.422054	0.255359	0.4487	0.427436	0.143908	0.147343	0.18193	0.151279	0.347575	0.297613	0.491273	0.156155	-0.132885	-0.360688	0	-0.274955	-0.191673	-0.338642	-0.366199	0	-0.497323	-0.154954
Otu0486	0	0	0	0	0	0	-0.665127	0	0	0	0	0	0	0	0	0	0	0	0	0	0	0	0	0	0	0	0	0	0	0	0	0	0	0	0	0	0	0	0	0	0	0	0	0	0	0	0	0	0
Otu0435	0.422433	0.497369	0.441119	0.516119	-0.413816	0.546711	-0.459869	0.329276	0.359211	0.343145	0.341118	0.530673	0.421675	-0.471618	-0.3353	0.164145	0.20625	0.0481982	0.224671	0.304534	0.233588	0.332237	0.338487	0.168421	0.366997	0.394408	0.233553	0.203681	0.0309211	0.256986	0.30329	0.589474	0.0844137	0.12619	0.0832364	0.215822	0.681579	0.356523	-0.205263	-0.319408	-0.457566	-0.619737	-0.567434	-0.299342	-0.417105	-0.420724	-0.42204	-0.506492	-0.31518
Otu0426	0.301633	0.383394	0.397436	0.449328	-0.208791	0.459096	-0.153846	0.334554	0.420024	0.375515	0.330281	0.350786	0.464122	-0.0879255	-0.228702	-0.195971	0.229548	0.0485422	0.0592186	0.175267	0.0998321	0.111111	0.327228	0.396215	0.390475	0.465201	0.186203	0.100763	0.114164	0.307176	0.415751	0.392552	0.421438	0.248855	0.117845	0.23111	0.407204	0.408244	-0.115995	-0.0537241	-0.120879	-0.325397	-0.181319	-0.205739	-0.513431	-0.184982	-0.117216	-0.512288	-0.184705
Otu0371	0.379117	0.581754	0.521742	0.514393	-0.505208	0.470915	-0.600738	0.454993	0.44397	0.425358	0.352727	0.206401	0.383769	-0.300415	-0.234304	0.0385795	0.0796085	-0.0419539	-0.031231	0.100766	0.163528	0.107778	0.292714	0.444583	0.459656	0.29945	0.455605	0.451763	0.353951	0.570599	0.472139	0.462341	0.30357	0.41164	0.291534	0.36748	0.485612	0.196938	-0.175751	-0.575018	-0.575018	-0.234539	-0.489286	-0.401717	-0.38702	-0.481325	-0.218005	-0.551526	-0.421683
Otu0274	0.425881	0.667512	0.652734	0.554824	-0.495092	0.570218	-0.567755	0.562829	0.598544	0.50379	0.519108	0.31102	0.54175	-0.284229	-0.218055	0	0	0	0	0.387756	0.323953	0.231536	0.386098	0.554208	0.676237	0.474771	0.448293	0.425022	0.303583	0.595031	0.485855	0.616402	0.433096	0.487852	0.377843	0.455136	0.578839	0.197728	-0.214294	-0.542508	-0.435361	-0.401493	-0.361467	-0.441519	-0.46184	-0.345456	-0.205057	-0.463758	-0.436351
Otu0222	0.190316	0.257789	0.16799	0.161882	-0.328039	0.173488	-0.441662	0.12584	0.267563	0.131969	0.243739	0.0504048	0.0614116	-0.0516267	-0.162542	0.0922419	0.189371	-0.0299374	0.0543678	0.0415521	0.261188	0.13317	0.333537	0.267563	0.288682	-0.0757483	0.284056	0.221509	0.339646	0.510846	0.244349	0.239462	0.374943	0.293309	0.215366	0.260577	0.213806	0.0534678	0.0623091	-0.248015	-0.374466	-0.11179	-0.192425	-0.455101	-0.130116	-0.276115	-0.0800244	-0.187261	-0.199175
Otu0212	0.331866	0.506845	0.411599	0.400776	-0.286357	0.300273	-0.4317	0.338	0.432628	0.265678	0.372326	0.198408	0.279639	-0.123715	-0.200294	-0.039892	0.194203	-0.0371145	0.0439122	0.147708	0.347794	0.107616	0.327177	0.48458	0.393723	0.209665	0.395519	0.335474	0.365832	0.511795	0.278007	0.297799	0.475985	0.357901	0.282071	0.385837	0.349133	0.210193	-0.0624666	-0.192038	-0.270895	-0.101122	-0.201625	-0.328104	-0.426134	-0.258216	-0.0807118	-0.287792	-0.369908
Otu0207	0	0.466422	0.418193	0.443223	0	0.45116	0	0.459096	0	0.443291	0	0	0.507481	0	0	-0.493284	0	0	0	0	0	0	0	0.506105	0	0.466422	0	0	0	0.577099	0.433455	0	0	0	0.417036	0.438712	0	0.608244	0	0	0	0	0	0	-0.429792	0	0	-0.435048	0
Otu0143	0.252329	0.37752	0.257178	0.287111	-0.27245	0.396457	-0.335981	0.118509	0.263897	0.163128	0.103849	0.273713	0.161931	-0.045517	-0.272533	0.147221	0.35675	-0.146632	0.0415394	0.19615	0.0669009	-0.0323763	0.464875	0.2865	0.0354361	0.134392	0.266341	0.228231	0.113012	0.266117	0.21686	0.158827	0.359358	0.169264	0.0846189	0.192455	0.285889	0.387107	-0.100794	-0.181429	-0.340257	-0.276115	-0.171655	-0.32132	-0.486866	-0.477092	-0.0623091	-0.481136	-0.132885
Otu0126	0.331908	0.479927	0.376431	0.359945	-0.536407	0.443291	-0.742787	0.211265	0.2363	0.29542	0.230194	0.147786	0.256528	-0.0812214	-0.225073	-0.0122119	-0.039078	-0.236336	-0.196611	0.0400061	-0.100458	-0.0989162	0.317203	0.246069	0.397557	0.238132	0.354755	0.474424	0.156617	0.523133	0.296749	0.491833	0.291234	0.216674	0.0876336	0.334656	0.566631	0.334708	0.253091	-0.20058	-0.472294	-0.308045	-0.415204	-0.384979	-0.297359	-0.415509	-0.169745	-0.507176	-0.223969
Otu0018	0.352618	0.406593	0.261294	0.351648	-0.321123	0.242979	-0.459707	0.237485	0.311355	0.246375	0.283883	0.188368	0.212824	-0.110823	-0.130992	-0.0671551	0.100733	-0.167608	0.0732601	0.100153	0.243016	0.130647	0.322955	0.331502	0.243627	0.181929	0.347985	0.300153	0.266789	0.432672	0.302198	0.284493	0.184456	0.295573	0.280568	0.306823	0.300977	0.305038	0	-0.23138	-0.327228	-0.14652	-0.343712	-0.274115	-0.278388	-0.385226	-0.0634921	-0.352007	-0.255228
Otu0420	0.540681	0.545788	0.490842	0.534799	-0.614164	0.518926	-0.39072	0.528694	0.486569	0.572432	0.499389	0.329415	0.518168	-0.523279	-0.33313	-0.0824176	0.150794	0.135247	0.164835	0.181069	0.287284	0.395604	0.392552	0.357753	0.509235	0.582418	0.455433	0.386565	0.288156	0.463511	0.557998	0.562271	0.210719	0.465344	0.445428	0.341627	0.327839	0.421374	-0.21978	-0.394383	-0.504884	-0.398657	-0.594017	-0.228938	-0.411477	-0.489621	-0.349206	-0.588002	-0.380705
Otu0557	0.622832	0.362651	0.42208	0.598453	-0.556916	0.425276	0.13835	0.595897	0.577365	0.558759	0.577046	0.468961	0.467275	-0.580969	-0.58681	0.286925	0.440612	0.585123	0.295552	0.334156	0.355675	0.540301	0.255932	0.269352	0.151474	0.293316	0.326545	0.103395	0.372556	0.344863	0.426873	0.321113	0.204744	0.282378	0.582407	0.306622	0.166468	-0.0934869	-0.517616	-0.522728	-0.376709	-0.294274	-0.417927	-0.552123	-0.4224	-0.169663	-0.322711	-0.459374	-0.717423
Otu0319	0.559609	0.571429	0.64652	0.654457	-0.566545	0.675214	-0.0805861	0.687424	0.672772	0.634102	0.643468	0.622195	0.681221	-0.725385	-0.694351	0.394383	0.532357	0.520531	0.467033	0.419542	0.448481	0.663004	0.393162	0.376679	0.427721	0.509158	0.346764	0.147786	0.263736	0.301985	0.557387	0.503053	0.259276	0.280916	0.412761	0.252175	0.392552	-0.00732824	-0.628816	-0.616606	-0.496947	-0.503663	-0.503053	-0.482295	-0.62149	-0.301587	-0.492674	-0.572126	-0.606014
Otu0134	0	0	0	0	0	0	0	0	0	0	0	0	0	0	0	0	0	0.595329	0	0	0	0	0	0	0	0	0	0	0	0	0	0	0	0	0	0	0	0	0	0	0	0	0	0	0	0	0	0	0
Otu1166	0	0	0	0	0	0	-0.671492	0	0	0	0	0	0	0	0	0	0	0	0	0	0	0	0	0	0	0	0	0	0	0	0	0	0	0	0	0	0	0	0	0	0	0	0	0	0	0	0	0	0
Otu1008	0	0	0	0	0	0	0	0	0	0	0	0	0	0	0	0	0	-0.621161	0	0	0	0	0	0	0	0	0	0	0	0	0	0	0	0	0	0	0	0	0	0	0	0	0	0	0	0	0	0	0
Otu0874	0	0	0	0	0	0	0	0	0	0	0	0	0	0.511954	0	0	-0.533568	0	-0.646239	0	-0.486372	-0.594436	0	0	0	0	0	0	0	0	0	0	0	0	0	0	0	0	0.584723	0	0	0	0	0	0	0	0	0	0
Otu0630	-0.104593	0.0951875	0.0336718	-0.130154	-0.0271964	0.0686386	-0.462339	-0.237645	-0.0718762	-0.195585	-0.0647534	-0.0773921	-0.1642	0.245453	0.0832335	0.0181309	-0.0349668	-0.343245	-0.163178	-0.115944	0.0191052	-0.249948	0.139867	0.179367	-0.0537535	-0.119794	0.146343	0.23707	0.0984251	0.203388	-0.159293	0.0543928	0.185279	0.0178126	-0.0148955	0.2257	0.0563354	0.149302	0.404061	0.195555	-0.0181309	0.0867695	-0.029139	-0.263546	-0.0271964	-0.282325	0.112023	-0.116574	-0.0712396
Otu0177	0	0	0	0	0	0	-0.579454	0	0	0	0	0	0	0	0	0	0	0	0	0	0	0	0	0	0	0	0	0	0	0	0	0	0	0	0	0	0	0	0	0	0	0	0	0	0	0	0	0	0
Otu0914	0	0	0	0	0	0	0	0	0	0	0	0	0	0	0	0	0	0	0	0	0	0	0	0	0	0	0	0	0	0	0	0	0	0	0	0	0	0	-0.570827	0	0	0	0	0	0	0	0	0	0
[truncated: 12 more columns]

## Sheet: CorrOTULipids
	Otu0499	Otu0809	Otu1166	Otu0420	Otu0126	Otu0143	Otu0207	Otu0214	Otu0245	Otu0423	Otu0426	Otu0486	Otu0616	Otu0648	Otu0649	Otu0705	Otu0726	Otu0834	Otu0954	Otu0979	Otu1180	Otu0128	Otu0269	Otu0299	Otu0875	Otu0959	Otu1081	Otu1102
Lipid_17	-0.72977	-0.627849	0	0	0	0	0	0	-0.659133	-0.624015	-0.619048	-0.5317	0	0	-0.642518	-0.602101	-0.735855	-0.734869	-0.583391	0	-0.465201	0	0.564713	0.594614	0.45177	0.505299	0.601735	0
Lipid_19	-0.690918	0	0	0	0	0	0	0	0	0	-0.679487	-0.443195	-0.649655	0	0	-0.687254	-0.594079	-0.72829	-0.695078	-0.555448	-0.5116	0.427961	0.587912	0.769753	0.546398	0	0	0
Lipid_36	0	-0.580241	0	0	0	0	0	-0.65058	0	0	0	-0.305074	0	0	0	0	0	0	-0.392095	0	0	0	0	0	0.412698	0	0.635565	0
Lipid_44	0	0	0	0	0	0	0	0	0	0	0	0.262162	0	0	0	0	0	0	0.446355	0	0	-0.531136	-0.443223	0	0	0	0	0
Lipid_60	0	0	0	0.505495	0	0	0	0	0	0	0	0.489459	0	0	0	0	0.402632	0	0.463782	0	0.498779	-0.746032	-0.489011	0	-0.430403	-0.512412	0	0
Lipid_63	0	0.531994	0	0.521368	0	0	0	0	0	0	0	0.528347	0	0	0	0	0.420724	0.51875	0.535468	0	0.494505	-0.74359	-0.532357	0	-0.521978	-0.616317	0	0
Lipid_89	0	0	0	0.518315	0	0	0	0	0	0	0	0.458616	0	0	0	0	0	0.512171	0.588143	0	0.474969	-0.801587	-0.516484	0	-0.465201	-0.535296	0	0
SE 20:4_SE_NH4+	0	0	0	0.443834	0	0	0	0	0	0	0	0.506891	0	0	0	0	0	0.477303	0.559231	0.616922	0.362637	0	-0.474969	0	-0.453602	-0.598999	0	0
	Lipid_17	Lipid_19	Lipid_36	Lipid_44	Lipid_60	Lipid_63	Lipid_89	SE 20:4_SE_NH4+	Taxonomy	Categories	Order
Otu1102	0	0	0	0	0	0	0	0	Bacteria(100)-Firmicutes(100)-Clostridia(100)-Clostridiales(100)-Gracilibacteraceae(100)-Lutispora(100)-	Cat 18	28	18
Otu1081	0.601735	0	0.635565	0	0	0	0	0	Bacteria(100)-Actinobacteria(100)-Actinobacteria(100)-Coriobacteriales(100)-Coriobacteriaceae(100)-Olsenella(100)-	Cat 18	27	18
Otu0959	0.505299	0	0	0	-0.512412	-0.616317	-0.535296	-0.598999	Bacteria(100)-Actinobacteria(100)-Actinobacteria(100)-Coriobacteriales(100)-Coriobacteriaceae(100)-Adlercreutzia(100)-	Cat 18	26	18
Otu0875	0.45177	0.546398	0.412698	0	-0.430403	-0.521978	-0.465201	-0.453602	Bacteria(100)-Bacteroidetes(100)-Bacteroidia(100)-Bacteroidales(100)-Porphyromonadaceae(100)-Barnesiella(100)-	Cat 18	25	18
Otu0299	0.594614	0.769753	0	0	0	0	0	0	Bacteria(100)-Firmicutes(100)-Clostridia(100)-Clostridiales(100)-Lachnospiraceae(100)-Clostridium_XlVa(100)-	Cat 18	24	18
Otu0269	0.564713	0.587912	0	-0.443223	-0.489011	-0.532357	-0.516484	-0.474969	Bacteria(100)-Firmicutes(100)-Clostridia(100)-Clostridiales(100)-Ruminococcaceae(100)-Papillibacter(100)-	Cat 18	23	18
Otu0128	0	0.427961	0	-0.531136	-0.746032	-0.74359	-0.801587	0	Bacteria(100)-Bacteroidetes(100)-Bacteroidia(100)-Bacteroidales(100)-Porphyromonadaceae(100)-Barnesiella(100)-	Cat 18	22	18
Otu1180	-0.465201	-0.5116	0	0	0.498779	0.494505	0.474969	0.362637	Bacteria(100)-Proteobacteria(100)-Deltaproteobacteria(100)-Bdellovibrionales(100)-Bdellovibrionaceae(100)-Vampirovibrio(100)-	Cat 15	21	15
Otu0979	0	-0.555448	0	0	0	0	0	0.616922	Bacteria(100)-Firmicutes(100)-Clostridia(100)-Clostridiales(100)-Ruminococcaceae(100)-Butyricicoccus(100)-	Cat 15	20	15
Otu0954	-0.583391	-0.695078	-0.392095	0.446355	0.463782	0.535468	0.588143	0.559231	Bacteria(100)-Proteobacteria(100)-Betaproteobacteria(100)-Burkholderiales(100)-Sutterellaceae(100)-Sutterella(100)-	Cat 15	19	15
Otu0834	-0.734869	-0.72829	0	0	0	0.51875	0.512171	0.477303	Bacteria(100)-Firmicutes(100)-Clostridia(100)-Clostridiales(100)-Lachnospiraceae(100)-Coprococcus(100)-	Cat 15	18	15
Otu0726	-0.735855	-0.594079	0	0	0.402632	0.420724	0	0	Bacteria(100)-Firmicutes(100)-Clostridia(100)-Clostridiales(100)-Ruminococcaceae(100)-Clostridium_III(100)-	Cat 15	17	15
Otu0705	-0.602101	-0.687254	0	0	0	0	0	0	Bacteria(100)-Proteobacteria(100)-Alphaproteobacteria(100)-Rhodospirillales(100)-Rhodospirillaceae(100)-Dongia(100)-	Cat 15	16	15
Otu0649	-0.642518	0	0	0	0	0	0	0	Bacteria(100)-Firmicutes(100)-Clostridia(100)-Clostridiales(100)-Ruminococcaceae(100)-Acetivibrio(100)-	Cat 15	15	15
Otu0648	0	0	0	0	0	0	0	0	Bacteria(100)-Firmicutes(100)-Clostridia(100)-Clostridiales(100)-Lachnospiraceae(100)-Clostridium_XlVa(100)-	Cat 15	14	15
Otu0616	0	-0.649655	0	0	0	0	0	0	Bacteria(100)-Firmicutes(100)-Clostridia(100)-Clostridiales(100)-Lachnospiraceae(100)-Lactonifactor(100)-	Cat 15	13	15
Otu0486	-0.5317	-0.443195	-0.305074	0.262162	0.489459	0.528347	0.458616	0.506891	Bacteria(100)-Firmicutes(100)-Clostridia(100)-Clostridiales(100)-Ruminococcaceae(100)-Ruminococcus(100)-	Cat 15	12	15
Otu0426	-0.619048	-0.679487	0	0	0	0	0	0	Bacteria(100)-Firmicutes(100)-Clostridia(100)-Clostridiales(100)-Ruminococcaceae(100)-Pseudoflavonifractor(100)-	Cat 15	11	15
Otu0423	-0.624015	0	0	0	0	0	0	0	Bacteria(100)-Firmicutes(100)-Clostridia(100)-Clostridiales(100)-Clostridiaceae_1(100)-Anaerosporobacter(100)-	Cat 15	10	15
Otu0245	-0.659133	0	0	0	0	0	0	0	Bacteria(100)-Firmicutes(100)-Clostridia(100)-Clostridiales(100)-Ruminococcaceae(100)-Oscillibacter(100)-	Cat 15	9	15
Otu0214	0	0	-0.65058	0	0	0	0	0	Bacteria(100)-Firmicutes(100)-Clostridia(100)-Clostridiales(100)-Ruminococcaceae(100)-Flavonifractor(57)-	Cat 15	8	15
Otu0207	0	0	0	0	0	0	0	0	Bacteria(100)-Firmicutes(100)-Clostridia(100)-Clostridiales(100)-Ruminococcaceae(100)-Hydrogenoanaerobacterium(100)-	Cat 15	7	15
Otu0143	0	0	0	0	0	0	0	0	Bacteria(100)-Firmicutes(100)-Clostridia(100)-Clostridiales(100)-Lachnospiraceae(100)-unclassified-	Cat 15	6	15
Otu0126	0	0	0	0	0	0	0	0	Bacteria(100)-Firmicutes(100)-Clostridia(100)-Clostridiales(100)-Lachnospiraceae(100)-Clostridium_XlVa(100)-	Cat 15	5	15
Otu0420	0	0	0	0	0.505495	0.521368	0.518315	0.443834	Bacteria(100)-Firmicutes(100)-Clostridia(100)-Clostridiales(100)-Lachnospiraceae(100)-Clostridium_XlVb(100)-	Cat 14	4	14
Otu1166	0	0	0	0	0	0	0	0	Bacteria(100)-Firmicutes(100)-Clostridia(100)-Clostridiales(100)-Lachnospiraceae(100)-Parasporobacterium(100)-	Cat 10	3	10
Otu0809	-0.627849	0	-0.580241	0	0	0.531994	0	0	Bacteria(100)-Firmicutes(100)-Clostridia(100)-Clostridiales(100)-Lachnospiraceae(100)-Lachnobacterium(100)-	Cat 10	2	10
Otu0499	-0.72977	-0.690918	0	0	0	0	0	0	Bacteria(100)-Firmicutes(100)-Clostridia(100)-Clostridiales(100)-Lachnospiraceae(100)-Lachnospiracea_incertae_sedis(100)-	Cat 10	1	10

## Sheet: CorrOTUsPhysiology
			Order
Otu1102	Bacteria(100)-Firmicutes(100)-Clostridia(100)-Clostridiales(100)-Gracilibacteraceae(100)-Lutispora(100)-	Cat 18	60		body weight (g)
Otu1081	Bacteria(100)-Actinobacteria(100)-Actinobacteria(100)-Coriobacteriales(100)-Coriobacteriaceae(100)-Olsenella(100)-	Cat 18	59		lean mass
Otu0959	Bacteria(100)-Actinobacteria(100)-Actinobacteria(100)-Coriobacteriales(100)-Coriobacteriaceae(100)-Adlercreutzia(100)-	Cat 18	58		fat mass
Otu0937	Bacteria(100)-Firmicutes(100)-Clostridia(100)-Clostridiales(100)-Ruminococcaceae(100)-Clostridium_III(100)-	Cat 18	57		Gastrocnemius muscle mass (g)
Otu0922	Bacteria(100)-Firmicutes(100)-Clostridia(100)-Clostridiales(100)-Ruminococcaceae(100)-Sporobacter(100)-	Cat 18	56		Sciatic response amplitude (mV)
Otu0875	Bacteria(100)-Bacteroidetes(100)-Bacteroidia(100)-Bacteroidales(100)-Porphyromonadaceae(100)-Barnesiella(100)-	Cat 18	55		Triceps muscle mass (g)
Otu0761	Bacteria(100)-Firmicutes(100)-Clostridia(100)-Clostridiales(100)-Lachnospiraceae(100)-Anaerostipes(100)-	Cat 18	54		Radial response amplitude (mV)
Otu0575	Bacteria(100)-Firmicutes(100)-Clostridia(100)-Clostridiales(100)-Lachnospiraceae(100)-Butyrivibrio(100)-	Cat 18	53		Heart muscle mass
Otu0299	Bacteria(100)-Firmicutes(100)-Clostridia(100)-Clostridiales(100)-Lachnospiraceae(100)-Clostridium_XlVa(100)-	Cat 18	52		B12 total (pmol/L)
Otu0269	Bacteria(100)-Firmicutes(100)-Clostridia(100)-Clostridiales(100)-Ruminococcaceae(100)-Papillibacter(100)-	Cat 18	51		folate level (nmol/L)
Otu0178	Bacteria(100)-Firmicutes(100)-Clostridia(100)-Clostridiales(100)-Ruminococcaceae(100)-Ruminococcus(100)-	Cat 18	50
Otu0128	Bacteria(100)-Bacteroidetes(100)-Bacteroidia(100)-Bacteroidales(100)-Porphyromonadaceae(100)-Barnesiella(100)-	Cat 18	49
Otu1145	Bacteria(100)-Firmicutes(100)-Clostridia(100)-Clostridiales(100)-Ruminococcaceae(100)-Clostridium_III(100)-	Cat 16	48
Otu0829	Bacteria(100)-Firmicutes(100)-Clostridia(100)-Clostridiales(100)-Lachnospiraceae(100)-Roseburia(100)-	Cat 16	47
Otu0638	Bacteria(100)-Proteobacteria(100)-Alphaproteobacteria(100)-Rickettsiales(100)-Rickettsiaceae(100)-Orientia(100)-	Cat 16	46
Otu0595	Bacteria(100)-Firmicutes(100)-Clostridia(100)-Clostridiales(100)-Lachnospiraceae(100)-Acetitomaculum(100)-	Cat 16	45
Otu1180	Bacteria(100)-Proteobacteria(100)-Deltaproteobacteria(100)-Bdellovibrionales(100)-Bdellovibrionaceae(100)-Vampirovibrio(100)-	Cat 15	44
Otu1137	Bacteria(100)-Firmicutes(100)-Clostridia(100)-Clostridiales(100)-Ruminococcaceae(100)-Papillibacter(100)-	Cat 15	43
Otu1134	Bacteria(100)-Firmicutes(100)-Clostridia(100)-Clostridiales(100)-Ruminococcaceae(100)-Ruminococcus(100)-	Cat 15	42
Otu1133	Bacteria(100)-Firmicutes(100)-Clostridia(100)-Clostridiales(100)-Ruminococcaceae(100)-Oscillibacter(100)-	Cat 15	41
Otu1104	Bacteria(100)-Proteobacteria(100)-Alphaproteobacteria(100)-Rhodospirillales(100)-Rhodospirillaceae(100)-Insolitispirillum(100)-	Cat 15	40
Otu1094	Bacteria(100)-Firmicutes(100)-Clostridia(100)-Clostridiales(100)-Lachnospiraceae(100)-Syntrophococcus(100)-	Cat 15	39
Otu1004	Bacteria(100)-Elusimicrobia(100)-Elusimicrobia(100)-Elusimicrobiales(100)-Elusimicrobiaceae(100)-Elusimicrobium(100)-	Cat 15	38
Otu0979	Bacteria(100)-Firmicutes(100)-Clostridia(100)-Clostridiales(100)-Ruminococcaceae(100)-Butyricicoccus(100)-	Cat 15	37
Otu0962	Bacteria(100)-Firmicutes(100)-Clostridia(100)-Clostridiales(100)-Ruminococcaceae(100)-Clostridium_IV(100)-	Cat 15	36
Otu0954	Bacteria(100)-Proteobacteria(100)-Betaproteobacteria(100)-Burkholderiales(100)-Sutterellaceae(100)-Sutterella(100)-	Cat 15	35
Otu0907	Bacteria(100)-Firmicutes(100)-Clostridia(100)-Clostridiales(100)-Ruminococcaceae(100)-Flavonifractor(100)-	Cat 15	34
Otu0834	Bacteria(100)-Firmicutes(100)-Clostridia(100)-Clostridiales(100)-Lachnospiraceae(100)-Coprococcus(100)-	Cat 15	33
Otu0733	Bacteria(100)-Firmicutes(100)-Clostridia(100)-Clostridiales(100)-Lachnospiraceae(100)-Parasporobacterium(100)-	Cat 15	32
Otu0726	Bacteria(100)-Firmicutes(100)-Clostridia(100)-Clostridiales(100)-Ruminococcaceae(100)-Clostridium_III(100)-	Cat 15	31
Otu0705	Bacteria(100)-Proteobacteria(100)-Alphaproteobacteria(100)-Rhodospirillales(100)-Rhodospirillaceae(100)-Dongia(100)-	Cat 15	30
Otu0648	Bacteria(100)-Firmicutes(100)-Clostridia(100)-Clostridiales(100)-Lachnospiraceae(100)-Clostridium_XlVa(100)-	Cat 15	29
Otu0616	Bacteria(100)-Firmicutes(100)-Clostridia(100)-Clostridiales(100)-Lachnospiraceae(100)-Lactonifactor(100)-	Cat 15	28
Otu0599	Bacteria(100)-Firmicutes(100)-Clostridia(100)-Clostridiales(100)-Lachnospiraceae(100)-Clostridium_XlVa(100)-	Cat 15	27
Otu0558	Bacteria(100)-Firmicutes(100)-Clostridia(100)-Clostridiales(100)-Lachnospiraceae(100)-Clostridium_XlVa(100)-	Cat 15	26
Otu0538	Bacteria(100)-Firmicutes(100)-Clostridia(100)-Clostridiales(100)-Lachnospiraceae(100)-Marvinbryantia(100)-	Cat 15	25
Otu0513	Bacteria(100)-Tenericutes(100)-Mollicutes(100)-Anaeroplasmatales(100)-Anaeroplasmataceae(100)-Anaeroplasma(100)-	Cat 15	24
Otu0435	Bacteria(100)-Firmicutes(100)-Clostridia(100)-Clostridiales(100)-Lachnospiraceae(100)-Clostridium_XlVa(100)-	Cat 15	23
Otu0426	Bacteria(100)-Firmicutes(100)-Clostridia(100)-Clostridiales(100)-Ruminococcaceae(100)-Pseudoflavonifractor(100)-	Cat 15	22
Otu0423	Bacteria(100)-Firmicutes(100)-Clostridia(100)-Clostridiales(100)-Clostridiaceae_1(100)-Anaerosporobacter(100)-	Cat 15	21
Otu0371	Bacteria(100)-Proteobacteria(100)-Alphaproteobacteria(100)-Rhizobiales(100)-Hyphomicrobiaceae(100)-Gemmiger(100)-	Cat 15	20
Otu0274	Bacteria(100)-Firmicutes(100)-Clostridia(100)-Clostridiales(100)-Lachnospiraceae(100)-Johnsonella(100)-	Cat 15	19
Otu0245	Bacteria(100)-Firmicutes(100)-Clostridia(100)-Clostridiales(100)-Ruminococcaceae(100)-Oscillibacter(100)-	Cat 15	18
Otu0222	Bacteria(100)-Firmicutes(100)-Clostridia(100)-Clostridiales(100)-Ruminococcaceae(100)-Sporobacter(100)-	Cat 15	17
Otu0214	Bacteria(100)-Firmicutes(100)-Clostridia(100)-Clostridiales(100)-Ruminococcaceae(100)-Flavonifractor(57)-	Cat 15	16
Otu0207	Bacteria(100)-Firmicutes(100)-Clostridia(100)-Clostridiales(100)-Ruminococcaceae(100)-Hydrogenoanaerobacterium(100)-	Cat 15	15
Otu0143	Bacteria(100)-Firmicutes(100)-Clostridia(100)-Clostridiales(100)-Lachnospiraceae(100)-unclassified-	Cat 15	14
Otu0126	Bacteria(100)-Firmicutes(100)-Clostridia(100)-Clostridiales(100)-Lachnospiraceae(100)-Clostridium_XlVa(100)-	Cat 15	13
Otu0098	Bacteria(100)-Firmicutes(100)-Clostridia(100)-Clostridiales(100)-Ruminococcaceae(100)-Sporobacter(100)-	Cat 15	12
Otu0055	Bacteria(100)-Firmicutes(100)-Clostridia(100)-Clostridiales(100)-Clostridiales_Incertae_Sedis_XII(100)-Acidaminobacter(100)-	Cat 15	11
Otu0022	Bacteria(100)-Firmicutes(100)-Clostridia(100)-Clostridiales(100)-Lachnospiraceae(100)-Clostridium_XlVa(81)-	Cat 15	10
Otu0018	Bacteria(100)-Firmicutes(100)-Clostridia(100)-Clostridiales(100)-Ruminococcaceae(100)-Pseudoflavonifractor(62)-	Cat 15	9
Otu0005	Bacteria(100)-Firmicutes(100)-Clostridia(100)-Clostridiales(100)-unclassified-unclassified-	Cat 15	8
Otu0420	Bacteria(100)-Firmicutes(100)-Clostridia(100)-Clostridiales(100)-Lachnospiraceae(100)-Clostridium_XlVb(100)-	Cat 14	7
Otu0557	Bacteria(100)-Firmicutes(100)-Clostridia(100)-Clostridiales(100)-Ruminococcaceae(100)-Clostridium_IV(100)-	Cat 13	6
Otu0319	Bacteria(100)-Firmicutes(100)-Clostridia(100)-Clostridiales(100)-Ruminococcaceae(100)-Ruminococcus(100)-	Cat 13	5
Otu0809	Bacteria(100)-Firmicutes(100)-Clostridia(100)-Clostridiales(100)-Lachnospiraceae(100)-Lachnobacterium(100)-	Cat 10	4
Otu0570	Bacteria(100)-Firmicutes(100)-Clostridia(100)-Clostridiales(100)-Ruminococcaceae(100)-Clostridium_IV(100)-	Cat 10	3
Otu0496	Bacteria(100)-Firmicutes(100)-Clostridia(100)-Clostridiales(100)-Lachnospiraceae(100)-Dorea(100)-	Cat 10	2
Otu0177	Bacteria(100)-Firmicutes(100)-Negativicutes(100)-Selenomonadales(100)-Veillonellaceae(100)-Anaerosinus(100)-	Cat 10	1

## Sheet: Sheet9
Bacteria(100)	Bacteroidetes(100)	Bacteroidia(100)	Bacteroidales(100)	Porphyromonadaceae(100)	Barnesiella(100)
Bacteria(100)	Firmicutes(100)	Clostridia(94)	Clostridiales(94)	Lachnospiraceae(89)	Robinsoniella(89)
Bacteria(100)	Firmicutes(100)	Clostridia(100)	Clostridiales(100)	Ruminococcaceae(100)	Clostridium-IV(100)
Bacteria(100)	Firmicutes(100)	Erysipelotrichia(100)	Erysipelotrichales(100)	Erysipelotrichaceae(100)	Bulleidia(100)
Bacteria(100)	Firmicutes(100)	Clostridia(100)	Clostridiales(100)	unclassified	unclassified
Bacteria(100)	Firmicutes(100)	Clostridia(100)	Clostridiales(100)	Lachnospiraceae(100)	Robinsoniella(100)
Bacteria(100)	Bacteroidetes(100)	Bacteroidia(100)	Bacteroidales(100)	Porphyromonadaceae(100)	Tannerella(100)
Bacteria(100)	Firmicutes(100)	Clostridia(54)	Clostridiales(54)	unclassified	unclassified
Bacteria(100)	Firmicutes(100)	Clostridia(100)	Clostridiales(100)	Ruminococcaceae(68)	Saccharofermentans(68)
Bacteria(100)	Firmicutes(100)	Clostridia(100)	Clostridiales(100)	Ruminococcaceae(100)	Flavonifractor(87)
Bacteria(100)	Firmicutes(100)	Clostridia(100)	Clostridiales(100)	Lachnospiraceae(100)	Roseburia(100)
Bacteria(100)	Firmicutes(100)	Clostridia(100)	Clostridiales(100)	Clostridiales_Incertae_Sedis_XIII(97)	Anaerovorax(97)
Bacteria(100)	Firmicutes(100)	Clostridia(100)	Clostridiales(100)	Ruminococcaceae(100)	Sporobacter(100)
Bacteria(100)	Firmicutes(100)	Clostridia(100)	Clostridiales(100)	Ruminococcaceae(100)	Clostridium-IV(65)
Bacteria(100)	Bacteroidetes(100)	Bacteroidia(100)	Bacteroidales(100)	Porphyromonadaceae(100)	Barnesiella(100)
Bacteria(100)	Firmicutes(100)	Clostridia(100)	Clostridiales(100)	Lachnospiraceae(100)	Clostridium-XlVa(95)
Bacteria(100)	Bacteroidetes(100)	Bacteroidia(100)	Bacteroidales(100)	Porphyromonadaceae(100)	Barnesiella(100)
Bacteria(100)	Firmicutes(100)	Clostridia(100)	Clostridiales(100)	Ruminococcaceae(100)	Pseudoflavonifractor(62)
Bacteria(100)	Firmicutes(100)	Clostridia(100)	Clostridiales(100)	Ruminococcaceae(100)	Pseudoflavonifractor(71)
Bacteria(100)	Bacteroidetes(100)	Bacteroidia(100)	Bacteroidales(100)	Porphyromonadaceae(100)	Parabacteroides(100)
Bacteria(100)	Firmicutes(100)	Clostridia(100)	Clostridiales(100)	Clostridiales_Incertae_Sedis_XII(100)	Guggenheimella(100)
Bacteria(100)	Firmicutes(100)	Clostridia(100)	Clostridiales(100)	Lachnospiraceae(100)	Clostridium-XlVa(81)
Bacteria(100)	Firmicutes(100)	Clostridia(100)	Clostridiales(100)	Ruminococcaceae(95)	Acetivibrio(94)
Bacteria(100)	Firmicutes(100)	Clostridia(100)	Clostridiales(100)	Clostridiales_Incertae_Sedis_XIII(62)	Anaerovorax(62)
Bacteria(100)	Firmicutes(100)	Clostridia(100)	Clostridiales(100)	Lachnospiraceae(100)	Johnsonella(89)
Bacteria(100)	Firmicutes(100)	Erysipelotrichia(100)	Erysipelotrichales(100)	Erysipelotrichaceae(100)	Holdemania(100)
Bacteria(100)	Firmicutes(100)	Clostridia(100)	Clostridiales(100)	Lachnospiraceae(100)	Dorea(65)
Bacteria(100)	Bacteroidetes(100)	Bacteroidia(100)	Bacteroidales(100)	Porphyromonadaceae(100)	Barnesiella(100)
Bacteria(100)	Firmicutes(100)	Clostridia(100)	Clostridiales(100)	Ruminococcaceae(100)	Flavonifractor(80)
Bacteria(100)	Firmicutes(93)	Erysipelotrichia(93)	Erysipelotrichales(93)	Erysipelotrichaceae(93)	Holdemania(93)
Bacteria(100)	Firmicutes(100)	Clostridia(100)	Clostridiales(100)	Lachnospiraceae(79)	Robinsoniella(79)
Bacteria(100)	Firmicutes(100)	Clostridia(100)	Clostridiales(100)	Lachnospiraceae(100)	Clostridium-XlVa(92)
Bacteria(100)	Firmicutes(100)	Clostridia(100)	Clostridiales(100)	Lachnospiraceae(100)	unclassified
Bacteria(100)	Firmicutes(83)	Clostridia(83)	Clostridiales(83)	unclassified	unclassified
Bacteria(100)	Firmicutes(100)	Clostridia(100)	Clostridiales(100)	Lachnospiraceae(100)	Syntrophococcus(100)
Bacteria(100)	Firmicutes(100)	Clostridia(100)	Clostridiales(100)	Lachnospiraceae(100)	Clostridium-XlVa(100)
Bacteria(100)	Firmicutes(100)	Clostridia(100)	Clostridiales(100)	Ruminococcaceae(100)	Clostridium-IV(100)
Bacteria(100)	Firmicutes(100)	Clostridia(96)	Clostridiales(96)	Lachnospiraceae(72)	Robinsoniella(72)
Bacteria(100)	Firmicutes(100)	Erysipelotrichia(100)	Erysipelotrichales(100)	Erysipelotrichaceae(100)	Bulleidia(100)
Bacteria(100)	Firmicutes(100)	Clostridia(94)	Clostridiales(94)	Clostridiaceae_4(94)	Caminicella(94)
Bacteria(100)	Firmicutes(100)	Clostridia(100)	Clostridiales(100)	Lachnospiraceae(100)	Syntrophococcus(96)
Bacteria(100)	Proteobacteria(82)	Alphaproteobacteria(82)	Rickettsiales(82)	Rickettsiaceae(82)	Orientia(82)
Bacteria(100)	Firmicutes(100)	Clostridia(100)	Clostridiales(100)	Lachnospiraceae(100)	Clostridium-XlVa(99)
Bacteria(100)	Bacteroidetes(100)	Bacteroidia(100)	Bacteroidales(100)	Porphyromonadaceae(100)	Barnesiella(100)
Bacteria(100)	Firmicutes(100)	Clostridia(100)	Clostridiales(100)	Lachnospiraceae(99)	Robinsoniella(99)
Bacteria(100)	Firmicutes(100)	Clostridia(95)	Clostridiales(95)	Gracilibacteraceae(56)	Lutispora(56)
Bacteria(100)	Firmicutes(100)	Clostridia(100)	Clostridiales(100)	Lachnospiraceae(100)	Lachnospiracea-incertae-sedis(83)
Bacteria(100)	Firmicutes(100)	Clostridia(100)	Clostridiales(100)	Clostridiales_Incertae_Sedis_XIII(100)	Anaerovorax(100)
Bacteria(100)	Firmicutes(100)	Clostridia(100)	Clostridiales(100)	Lachnospiraceae(100)	Clostridium-XlVa(85)
Bacteria(100)	Firmicutes(100)	Clostridia(100)	Clostridiales(100)	Ruminococcaceae(100)	Butyricicoccus(100)
Bacteria(100)	Firmicutes(100)	Clostridia(100)	Clostridiales(100)	Lachnospiraceae(100)	Clostridium-XlVa(100)
Bacteria(100)	Bacteroidetes(100)	Bacteroidia(100)	Bacteroidales(100)	Porphyromonadaceae(100)	Barnesiella(100)
Bacteria(100)	Firmicutes(100)	Clostridia(93)	Clostridiales(93)	unclassified	unclassified
Bacteria(100)	Firmicutes(100)	Clostridia(100)	Clostridiales(100)	Ruminococcaceae(100)	Oscillibacter(100)
Bacteria(100)	Firmicutes(100)	Clostridia(100)	Clostridiales(100)	Clostridiales_Incertae_Sedis_XII(100)	Acidaminobacter(100)
Bacteria(100)	Firmicutes(100)	Erysipelotrichia(95)	Erysipelotrichales(95)	Erysipelotrichaceae(95)	Holdemania(93)
Bacteria(100)	Firmicutes(100)	Clostridia(100)	Clostridiales(100)	Lachnospiraceae(100)	Johnsonella(100)
Bacteria(100)	Firmicutes(100)	Clostridia(100)	Clostridiales(100)	Ruminococcaceae(100)	Clostridium-IV(100)
Bacteria(100)	Bacteroidetes(100)	Bacteroidia(100)	Bacteroidales(100)	Prevotellaceae(100)	Prevotella(100)
Bacteria(100)	Firmicutes(100)	Clostridia(100)	Clostridiales(100)	Lachnospiraceae(97)	Lachnospiracea-incertae-sedis(97)
Bacteria(100)	Firmicutes(100)	Clostridia(100)	Clostridiales(100)	Lachnospiraceae(100)	Parasporobacterium(61)
Bacteria(100)	Firmicutes(100)	Clostridia(100)	Clostridiales(100)	Ruminococcaceae(100)	Clostridium-IV(100)
Bacteria(100)	Firmicutes(100)	Clostridia(56)	Clostridiales(56)	unclassified	unclassified
Bacteria(100)	Bacteroidetes(100)	Bacteroidia(100)	Bacteroidales(100)	Porphyromonadaceae(100)	Barnesiella(100)
Bacteria(100)	Firmicutes(100)	Clostridia(100)	Clostridiales(100)	Ruminococcaceae(100)	Sporobacter(59)
Bacteria(100)	Firmicutes(100)	Clostridia(100)	Clostridiales(100)	Lachnospiraceae(100)	Dorea(76)
Bacteria(100)	Firmicutes(100)	Clostridia(100)	Clostridiales(100)	Lachnospiraceae(100)	Lachnospiracea-incertae-sedis(79)
Bacteria(100)	Firmicutes(100)	Clostridia(100)	Clostridiales(100)	Lachnospiraceae(100)	Roseburia(63)
Bacteria(100)	Firmicutes(100)	Clostridia(100)	Clostridiales(100)	Lachnospiraceae(100)	Lachnospiracea-incertae-sedis(61)
Bacteria(100)	Firmicutes(100)	Clostridia(100)	Clostridiales(100)	Ruminococcaceae(100)	Acetivibrio(93)
Bacteria(100)	Firmicutes(100)	Clostridia(100)	Clostridiales(100)	Lachnospiraceae(100)	Clostridium-XlVb(100)
Bacteria(100)	Firmicutes(100)	Clostridia(100)	Clostridiales(100)	Ruminococcaceae(100)	Anaerotruncus(100)
Bacteria(100)	Firmicutes(100)	Clostridia(100)	Clostridiales(100)	Lachnospiraceae(100)	Dorea(100)
Bacteria(100)	Firmicutes(100)	Erysipelotrichia(100)	Erysipelotrichales(100)	Erysipelotrichaceae(100)	Bulleidia(100)
Bacteria(100)	Firmicutes(100)	Clostridia(100)	Clostridiales(100)	Lachnospiraceae(100)	Lachnospiracea-incertae-sedis(100)
Bacteria(100)	Bacteroidetes(100)	Bacteroidia(100)	Bacteroidales(100)	Bacteroidaceae(100)	Bacteroides(100)
Bacteria(100)	Firmicutes(100)	Clostridia(100)	Clostridiales(100)	Lachnospiraceae(100)	Acetitomaculum(93)
Bacteria(100)	Firmicutes(100)	Clostridia(100)	Clostridiales(100)	Ruminococcaceae(100)	Sporobacter(64)
Bacteria(100)	Bacteroidetes(100)	Bacteroidia(100)	Bacteroidales(100)	Porphyromonadaceae(100)	Barnesiella(100)
Bacteria(100)	Firmicutes(100)	Clostridia(100)	Clostridiales(100)	Ruminococcaceae(100)	Sporobacter(100)
Bacteria(100)	Firmicutes(100)	Clostridia(100)	Clostridiales(100)	Lachnospiraceae(100)	Dorea(99)
Bacteria(100)	Firmicutes(100)	Clostridia(100)	Clostridiales(100)	Lachnospiraceae(51)	unclassified
Bacteria(100)	Firmicutes(100)	Clostridia(100)	Clostridiales(100)	Lachnospiraceae(100)	Clostridium-XlVa(100)
Bacteria(100)	Firmicutes(100)	Clostridia(100)	Clostridiales(100)	Lachnospiraceae(100)	Johnsonella(100)
Bacteria(100)	Bacteroidetes(100)	Bacteroidia(100)	Bacteroidales(100)	Bacteroidaceae(100)	Bacteroides(100)
Bacteria(100)	Firmicutes(100)	Clostridia(100)	Clostridiales(100)	Lachnospiraceae(100)	Clostridium-XlVa(97)
Bacteria(100)	Firmicutes(100)	Clostridia(100)	Clostridiales(100)	Lachnospiraceae(100)	unclassified
Bacteria(100)	Firmicutes(100)	Clostridia(100)	Clostridiales(100)	Lachnospiraceae(100)	Lactonifactor(100)
Bacteria(100)	Firmicutes(100)	Clostridia(100)	Clostridiales(100)	Lachnospiraceae(100)	Blautia(87)
Bacteria(100)	Firmicutes(100)	Clostridia(100)	Clostridiales(100)	Lachnospiraceae(100)	Dorea(79)
Bacteria(100)	Bacteroidetes(100)	Bacteroidia(100)	Bacteroidales(100)	Porphyromonadaceae(100)	Barnesiella(100)
Bacteria(100)	Firmicutes(52)	Clostridia(52)	Clostridiales(52)	Ruminococcaceae(52)	Faecalibacterium(52)
Bacteria(100)	Firmicutes(100)	Clostridia(100)	Clostridiales(100)	Ruminococcaceae(100)	Flavonifractor(97)
Bacteria(100)	Firmicutes(100)	Clostridia(100)	Clostridiales(100)	Clostridiales_Incertae_Sedis_XIII(94)	Anaerovorax(94)

[truncated: 3 more sheets: CorrOTUandOTU, Order in Correlation Plot, StatOTUsRightOrder]
