# Supplementary material for: Aging and sarcopenia associate with specific interactions between gut microbes, serum biomarkers and host physiology in rats
Source: Aging (Albany NY). 2017 Jul 17;9(7):1698–714. doi: 10.18632/aging.101262 (PMC5559170; doi:10.18632/aging.101262)
Supplement: Supplementary file 3 [file aging-09-1698-s003.xlsx]

## Sheet: Stat_Diff_PiCr_Data
This sheet contains the data of the statistically different PiCrust Data (normalized) when considering any of the following comparisons:
Age 8 vs Age 18, Age 8 vs Age 24 and Age 18 vs Age 24
KO ID	Name	KEGG_Description	Protein	EC	KEGG_Pathways	KEGG_Pathways_1	KEGG_Pathways_2	KEGG_Pathways_3	Age 8	Age 8	Age 8	Age 8	Age 8	Age 8	Age 8	Age 8	Age 8	Age 8	Age 18	Age 18	Age 18	Age 18	Age 18	Age 18	Age 18	Age 18	Age 18	Age 18	Age 20	Age 20	Age 20	Age 20	Age 20	Age 20	Age 20	Age 20	Age 20	Age 20	Age 22	Age 22	Age 22	Age 22	Age 22	Age 22	Age 22	Age 22	Age 22	Age 22	Age 24
K05597	glutamin-(asparagin-)ase [EC:3.5.1.38]	glutamin-(asparagin-)ase [EC:3.5.1.38]	glutamin-(asparagin-)ase	EC:3.5.1.38	Metabolism; Amino Acid Metabolism; Arginine and proline metabolism|Metabolism; Metabolism of Other Amino Acids; D-Glutamine and D-glutamate metabolism|Metabolism; Amino Acid Metabolism; Alanine, aspartate and glutamate metabolism|Metabolism; Energy Metabolism; Nitrogen metabolism	Metabolism	Amino Acid Metabolism	Arginine and proline metabolism	1.27503e-08	0	0	0	1.05707e-08	0	0	0	0	0	0	0	1.09115e-08	4.67992e-08	0	0	8.50386e-09	2.57344e-08	0	0	0	1.78886e-08	0	0	0	0	0	7.78177e-09	0	0	0	0	0	0	0	0	0	1.00284e-08	1.15533e-08	2.35782e-08	4.46168e-08
K13017	UDP-3-keto-D-GlcNAcA aminotransferase [EC:2.6.1.-]	UDP-3-keto-D-GlcNAcA aminotransferase [EC:2.6.1.-]	UDP-3-keto-D-GlcNAcA aminotransferase	EC:2.6.1.-	Metabolism; Glycan Biosynthesis and Metabolism; Lipopolysaccharide biosynthesis proteins|Metabolism; Amino Acid Metabolism; Amino acid related enzymes	Metabolism	Glycan Biosynthesis and Metabolism	Lipopolysaccharide biosynthesis proteins	0	0	0	0	0	0	0	0	0	0	0	0	0	0	0	0	8.50386e-09	0	0	0	0	0	0	0	1.49586e-08	0	0	7.78177e-09	0	9.60589e-09	0	0	0	0	0	0	0	0	0	0	0
K01828	None	None	None	0	Unclassified; Metabolism; Others	Unclassified	Metabolism	Others	0	0	0	0	0	0	0	0	0	0	0	0	0	0	2.1035e-08	0	8.50386e-09	0	0	0	0	0	1.41466e-08	0	0	0	0	0	0	9.60589e-09	0	0	0	0	0	0	0	0	0	0	0
K14067	malate-CoA ligase subunit beta [EC:6.2.1.9]	malate-CoA ligase subunit beta [EC:6.2.1.9]	malate-CoA ligase subunit beta	EC:6.2.1.9	Metabolism; Carbohydrate Metabolism; Glyoxylate and dicarboxylate metabolism|Metabolism; Energy Metabolism; Methane metabolism	Metabolism	Carbohydrate Metabolism	Glyoxylate and dicarboxylate metabolism	0	0	0	0	0	0	0	0	0	0	0	0	0	0	0	0	0	0	0	0	0	0	0	0	0	0	0	0	0	0	8.86264e-09	0	0	0	0	0	0	0	0	0	1.48723e-08
K12428	fatty acid CoA ligase FadD32	fatty acid CoA ligase FadD32	fatty acid CoA ligase FadD32	0	Metabolism; Lipid Metabolism; Lipid biosynthesis proteins	Metabolism	Lipid Metabolism	Lipid biosynthesis proteins	0	0	0	0	0	0	0	0	0	0	0	0	0	0	2.1035e-08	0	0	0	0	0	0	0	1.41466e-08	0	0	0	0	0	0	0	0	0	0	0	0	0	0	0	0	0	0
K05927	quinone-reactive Ni/Fe-hydrogenase small subunit [EC:1.12.5.1]	quinone-reactive Ni/Fe-hydrogenase small subunit [EC:1.12.5.1]	quinone-reactive Ni/Fe-hydrogenase small subunit	EC:1.12.5.1	Unclassified; Metabolism; Energy metabolism	Unclassified	Metabolism	Energy metabolism	0	0	0	0	0	0	0	0	0	0	0	0	0	0	2.41903e-07	1.53477e-08	2.55116e-08	0	1.23177e-07	1.14942e-07	0	1.96774e-07	1.41466e-08	9.09542e-07	9.57353e-07	1.05641e-06	2.90517e-06	6.53669e-07	0	0	0	6.00113e-09	0	0	1.37165e-08	0	0	0	0	0	0
K05922	quinone-reactive Ni/Fe-hydrogenase large subunit [EC:1.12.5.1]	quinone-reactive Ni/Fe-hydrogenase large subunit [EC:1.12.5.1]	quinone-reactive Ni/Fe-hydrogenase large subunit	EC:1.12.5.1	Unclassified; Metabolism; Energy metabolism	Unclassified	Metabolism	Energy metabolism	0	0	0	0	0	0	0	0	0	0	0	0	0	0	1.2621e-07	0	1.70077e-08	0	6.71874e-08	5.7471e-08	0	1.07331e-07	0	4.54771e-07	4.78677e-07	5.23358e-07	1.45258e-06	3.26834e-07	0	0	0	0	0	0	0	0	0	0	0	0	0
K01347	IgA-specific serine endopeptidase [EC:3.4.21.72]	IgA-specific serine endopeptidase [EC:3.4.21.72]	IgA-specific serine endopeptidase	EC:3.4.21.72	Environmental Information Processing; Membrane Transport; Secretion system|Metabolism; Enzyme Families; Peptidases	Environmental Information Processing	Membrane Transport	Secretion system	0	0	0	0	0	0	0	0	0	0	0	0	1.09115e-08	0	0	0	0	1.28672e-08	0	0	0	0	0	0	0	0	0	0	7.24216e-09	9.60589e-09	8.86264e-09	0	1.67492e-08	0	0	0	0	0	0	0	1.48723e-08
K04335	minor curlin subunit	minor curlin subunit	minor curlin subunit	0	Environmental Information Processing; Membrane Transport; Secretion system	Environmental Information Processing	Membrane Transport	Secretion system	0	0	0	0	0	0	0	0	0	0	0	0	0	0	0	0	0	0	0	0	0	0	0	0	0	0	0	0	0	0	0	0	0	0	0	0	0	0	0	0	0
K04338	curli production assembly/transport component CsgF	curli production assembly/transport component CsgF	curli production assembly/transport component CsgF	0	Environmental Information Processing; Membrane Transport; Secretion system	Environmental Information Processing	Membrane Transport	Secretion system	0	0	0	0	0	0	0	0	0	0	0	0	0	0	0	0	0	0	0	0	0	0	0	0	0	0	0	0	0	0	0	0	0	0	0	0	0	0	0	0	0
K13075	N-acyl homoserine lactone hydrolase [EC:3.1.1.81]	N-acyl homoserine lactone hydrolase [EC:3.1.1.81]	N-acyl homoserine lactone hydrolase	EC:3.1.1.81	Unclassified; Metabolism; Lipid metabolism	Unclassified	Metabolism	Lipid metabolism	0	0	0	0	0	0	0	0	0	0	0	0	0	0	0	0	0	0	0	0	0	0	0	0	0	0	0	0	0	0	8.86264e-09	0	0	0	0	0	0	0	0	0	1.48723e-08
K08692	malate-CoA ligase subunit alpha [EC:6.2.1.9]	malate-CoA ligase subunit alpha [EC:6.2.1.9]	malate-CoA ligase subunit alpha	EC:6.2.1.9	Metabolism; Carbohydrate Metabolism; Glyoxylate and dicarboxylate metabolism|Metabolism; Energy Metabolism; Methane metabolism	Metabolism	Carbohydrate Metabolism	Glyoxylate and dicarboxylate metabolism	0	0	0	0	0	0	0	0	0	0	0	0	0	0	0	0	0	0	0	0	0	0	0	0	0	0	0	0	0	0	8.86264e-09	0	0	0	0	0	0	0	0	0	1.48723e-08
K08693	3-nucleotidase [EC:3.1.3.6]	3'-nucleotidase [EC:3.1.3.6]	3'-nucleotidase	EC:3.1.3.6	Metabolism; Nucleotide Metabolism; Pyrimidine metabolism|Metabolism; Nucleotide Metabolism; Purine metabolism	Metabolism	Nucleotide Metabolism	Pyrimidine metabolism	0	0	0	0	0	0	0	0	0	0	0	0	0	0	4.207e-08	0	0	1.28672e-08	1.11979e-08	1.14942e-08	0	0	0	0	1.49586e-08	0	0	0	7.24216e-09	9.60589e-09	8.86264e-09	0	0	0	0	0	1.64863e-08	0	0	1.17891e-08	1.48723e-08
K08690	cis-2,3-dihydrobiphenyl-2,3-diol dehydrogenase [EC:1.3.1.56]	cis-2,3-dihydrobiphenyl-2,3-diol dehydrogenase [EC:1.3.1.56]	cis-2,3-dihydrobiphenyl-2,3-diol dehydrogenase	EC:1.3.1.56	Metabolism; Xenobiotics Biodegradation and Metabolism; Dioxin degradation	Metabolism	Xenobiotics Biodegradation and Metabolism	Dioxin degradation	1.27503e-08	0	0	0	0	0	0	0	0	0	0	0	1.09115e-08	4.67992e-08	0	0	8.50386e-09	2.57344e-08	0	0	0	0	0	0	0	0	0	0	0	0	0	0	0	0	0	0	0	1.00284e-08	1.15533e-08	2.35782e-08	2.97445e-08
K11740	bacteriophage N4 adsorption protein B	bacteriophage N4 adsorption protein B	bacteriophage N4 adsorption protein B	0	Unclassified; Poorly Characterized; General function prediction only	Unclassified	Poorly Characterized	General function prediction only	1.27503e-08	0	0	0	0	0	0	0	0	0	0	0	1.09115e-08	4.67992e-08	0	0	8.50386e-09	2.57344e-08	0	0	0	0	1.41466e-08	0	0	0	0	0	0	0	0	0	0	0	0	0	0	1.00284e-08	1.15533e-08	2.35782e-08	2.97445e-08
K09929	hypothetical protein	hypothetical protein	hypothetical protein	0	Unclassified; Poorly Characterized; Function unknown	Unclassified	Poorly Characterized	Function unknown	0	0	0	0	1.05707e-08	0	0	0	0	0	0	0	0	2.33996e-08	0	0	8.50386e-09	1.28672e-08	0	0	0	0	0	0	0	0	0	0	7.24216e-09	0	0	0	0	0	1.37165e-08	0	0	0	1.15533e-08	1.17891e-08	1.48723e-08
K00752	hyaluronan synthase [EC:2.4.1.212]	hyaluronan synthase [EC:2.4.1.212]	hyaluronan synthase	EC:2.4.1.212	Unclassified; Metabolism; Others	Unclassified	Metabolism	Others	0	0	0	2.34669e-08	0	0	0	0	3.17175e-08	3.68427e-08	0	0	0	0	2.1035e-08	0	0	0	0	0	0	0	0	0	0	0	3.82259e-08	0	1.44843e-08	1.92118e-08	0	0	0	0	0	0	4.9459e-08	0	0	0	5.9489e-08
K01668	tyrosine phenol-lyase [EC:4.1.99.2]	tyrosine phenol-lyase [EC:4.1.99.2]	tyrosine phenol-lyase	EC:4.1.99.2	Metabolism; Amino Acid Metabolism; Tyrosine metabolism|Metabolism; Energy Metabolism; Nitrogen metabolism	Metabolism	Amino Acid Metabolism	Tyrosine metabolism	0	0	0	0	0	0	0	0	0	0	0	0	0	0	0	0	0	1.28672e-08	0	0	0	0	0	0	0	0	0	0	0	0	0	0	0	0	0	0	0	0	0	1.17891e-08	0
K02319	DNA polymerase I [EC:2.7.7.7]	DNA polymerase I [EC:2.7.7.7]	DNA polymerase I	EC:2.7.7.7	Metabolism; Nucleotide Metabolism; Pyrimidine metabolism|Metabolism; Nucleotide Metabolism; Purine metabolism|Genetic Information Processing; Replication and Repair; DNA replication proteins	Metabolism	Nucleotide Metabolism	Pyrimidine metabolism	0	0	0	0	0	0	2.32067e-08	2.15452e-08	0	0	0	0	0	0	0	0	0	0	0	0	0	0	2.82933e-08	0	0	0	0	0	0	9.60589e-09	0	1.20023e-08	0	0	0	0	1.64863e-08	0	0	0	2.97445e-08
K11176	IMP cyclohydrolase [EC:3.5.4.10]	IMP cyclohydrolase [EC:3.5.4.10]	IMP cyclohydrolase	EC:3.5.4.10	Metabolism; Nucleotide Metabolism; Purine metabolism	Metabolism	Nucleotide Metabolism	Purine metabolism	0	0	0	2.34669e-08	0	0	0	0	3.17175e-08	3.68427e-08	0	0	0	0	2.1035e-08	0	0	0	0	0	0	0	0	0	0	0	3.82259e-08	0	1.44843e-08	1.92118e-08	0	0	0	0	0	0	4.9459e-08	0	0	0	5.9489e-08
K00320	coenzyme F420-dependent N5,N10-methenyltetrahydromethanopterin reductase [EC:1.5.99.11]	coenzyme F420-dependent N5,N10-methenyltetrahydromethanopterin reductase [EC:1.5.99.11]	coenzyme F420-dependent N5,N10-methenyltetrahydromethanopterin reductase	EC:1.5.99.11	Metabolism; Energy Metabolism; Methane metabolism	Metabolism	Energy Metabolism	Methane metabolism	0	0	0	0	0	0	0	1.07726e-08	0	0	0	0	0	0	0	0	0	0	0	0	0	0	0	0	0	0	0	0	0	0	0	0	0	0	0	0	0	0	0	0	0
K06945	None	None	None	0	Unclassified; Poorly Characterized; General function prediction only	Unclassified	Poorly Characterized	General function prediction only	1.27503e-08	0	0	0	0	0	0	0	0	0	0	0	1.09115e-08	4.67992e-08	0	0	8.50386e-09	2.57344e-08	0	0	0	0	0	0	0	0	0	0	0	0	0	0	0	0	0	0	0	1.00284e-08	1.15533e-08	2.35782e-08	2.97445e-08
K01044	carboxylesterase [EC:3.1.1.1]	carboxylesterase [EC:3.1.1.1]	carboxylesterase	EC:3.1.1.1	Metabolism; Biosynthesis of Other Secondary Metabolites; Tropane, piperidine and pyridine alkaloid biosynthesis|Metabolism; Xenobiotics Biodegradation and Metabolism; Drug metabolism - other enzymes	Metabolism	Biosynthesis of Other Secondary Metabolites	Tropane, piperidine and pyridine alkaloid biosynthesis	0	0	0	0	0	0	0	0	0	0	0	0	0	0	0	0	0	0	0	0	0	0	0	0	0	0	0	0	7.24216e-09	0	0	0	0	0	0	0	0	0	1.15533e-08	0	1.48723e-08
K00810	None	None	None	0	Unclassified; Metabolism; Metabolism of cofactors and vitamins	Unclassified	Metabolism	Metabolism of cofactors and vitamins	0	0	0	0	0	0	0	0	0	0	0	1.94043e-08	0	0	1.05175e-08	0	8.50386e-09	1.28672e-08	0	0	0	0	0	1.5159e-08	0	0	0	7.78177e-09	0	0	0	0	0	0	0	0	0	0	0	0	1.48723e-08
K03231	elongation factor EF-1 alpha subunit [EC:3.6.5.3]; elongation factor 1-alpha	elongation factor EF-1 alpha subunit [EC:3.6.5.3]; elongation factor 1-alpha	elongation factor EF-1 alpha subunit	EC:3.6.5.3	Genetic Information Processing; Translation; Translation factors|Genetic Information Processing; Translation; RNA transport	Genetic Information Processing	Translation	Translation factors	0	0	0	0	0	0	2.32067e-08	2.15452e-08	0	0	0	0	0	0	0	0	0	0	0	0	0	0	2.82933e-08	0	0	0	0	0	0	9.60589e-09	0	1.20023e-08	0	0	0	0	1.64863e-08	0	0	0	2.97445e-08
K03932	polyhydroxybutyrate depolymerase	polyhydroxybutyrate depolymerase	polyhydroxybutyrate depolymerase	0	Unclassified; Metabolism; Biosynthesis and biodegradation of secondary metabolites	Unclassified	Metabolism	Biosynthesis and biodegradation of secondary metabolites	0	1.68604e-08	0	1.17334e-08	0	0	0	0	0	0	0	1.94043e-08	0	2.33996e-08	3.15525e-08	0	1.70077e-08	1.28672e-08	0	0	0	0	1.41466e-08	1.5159e-08	1.49586e-08	0	0	7.78177e-09	0	1.92118e-08	0	0	1.67492e-08	0	1.37165e-08	0	0	2.00568e-08	1.15533e-08	2.35782e-08	2.97445e-08
K11159	carotenoid cleavage dioxygenase	carotenoid cleavage dioxygenase	carotenoid cleavage dioxygenase	0	Unclassified; Metabolism; Biosynthesis and biodegradation of secondary metabolites	Unclassified	Metabolism	Biosynthesis and biodegradation of secondary metabolites	0	0	0	0	0	0	0	0	0	0	0	0	0	0	0	0	0	0	0	0	0	0	0	0	0	0	0	0	0	0	0	0	0	0	0	0	0	0	0	0	0
K05345	putative cyclase [EC:4.6.1.-]	putative cyclase [EC:4.6.1.-]	putative cyclase	EC:4.6.1.-	Unclassified; Metabolism; Others	Unclassified	Metabolism	Others	2.55007e-08	5.05811e-08	2.07403e-08	1.17334e-08	0	0	5.80167e-08	9.69533e-08	4.75763e-08	3.68427e-08	0	0	0	2.33996e-08	1.05175e-08	0	0	1.28672e-08	0	1.14942e-08	0	1.78886e-08	2.82933e-08	3.03181e-08	0	9.69181e-09	1.91129e-08	7.78177e-09	7.24216e-09	0	1.77253e-08	0	0	2.84464e-08	0	0	0	0	1.15533e-08	1.17891e-08	0
K00466	tryptophan 2-monooxygenase [EC:1.13.12.3]	tryptophan 2-monooxygenase [EC:1.13.12.3]	tryptophan 2-monooxygenase	EC:1.13.12.3	Metabolism; Amino Acid Metabolism; Tryptophan metabolism	Metabolism	Amino Acid Metabolism	Tryptophan metabolism	0	0	0	0	0	0	0	0	0	0	0	0	0	0	0	0	0	0	0	0	0	0	0	0	0	0	0	0	0	0	0	0	0	0	0	0	0	0	0	0	1.48723e-08
K00469	inositol oxygenase [EC:1.13.99.1]	inositol oxygenase [EC:1.13.99.1]	inositol oxygenase	EC:1.13.99.1	Metabolism; Carbohydrate Metabolism; Inositol phosphate metabolism|Metabolism; Carbohydrate Metabolism; Ascorbate and aldarate metabolism	Metabolism	Carbohydrate Metabolism	Inositol phosphate metabolism	0	0	0	0	0	0	0	0	0	0	0	0	0	2.33996e-08	0	0	0	0	0	0	0	0	0	0	0	0	0	0	0	0	0	0	0	0	0	0	0	1.00284e-08	0	1.17891e-08	1.48723e-08
K02352	drp35	drp35	drp35	0	Metabolism; Biosynthesis of Other Secondary Metabolites; beta-Lactam resistance	Metabolism	Biosynthesis of Other Secondary Metabolites	beta-Lactam resistance	0	0	2.07403e-08	0	0	0	0	0	0	0	0	0	0	0	0	0	8.50386e-09	0	0	0	0	0	0	0	0	0	0	0	0	9.60589e-09	0	0	0	0	0	0	0	0	0	0	0
K13573	proteasome accessory factor C	proteasome accessory factor C	proteasome accessory factor C	0	Unclassified; Genetic Information Processing; Protein folding and associated processing	Unclassified	Genetic Information Processing	Protein folding and associated processing	0	0	0	0	0	0	0	0	0	0	0	0	0	0	2.1035e-08	0	0	0	0	0	0	0	1.41466e-08	0	0	0	0	0	0	0	0	0	0	0	0	0	0	1.00284e-08	0	0	0
K07326	hemolysin activation/secretion protein	hemolysin activation/secretion protein	hemolysin activation/secretion protein	0	Human Diseases; Infectious Diseases; Pertussis	Human Diseases	Infectious Diseases	Pertussis	0	0	0	0	0	0	0	0	0	0	0	0	0	0	0	0	8.50386e-09	0	0	0	0	0	0	0	1.49586e-08	0	0	0	0	9.60589e-09	0	0	0	0	0	0	0	0	0	0	0
K10843	DNA excision repair protein ERCC-3 [EC:3.6.4.12]; DNA excision repair protein ERCC-3 [EC:3.6.1.-]	DNA excision repair protein ERCC-3 [EC:3.6.4.12]; DNA excision repair protein ERCC-3 [EC:3.6.1.-]	DNA excision repair protein ERCC-3	EC:3.6.4.12	Genetic Information Processing; Replication and Repair; Nucleotide excision repair|Genetic Information Processing; Transcription; Transcription machinery|Genetic Information Processing; Transcription; Basal transcription factors|Genetic Information Processing; Replication and Repair; DNA repair and recombination proteins	Genetic Information Processing	Replication and Repair	Nucleotide excision repair	0	1.68604e-08	0	1.17334e-08	0	0	0	0	0	0	0	1.94043e-08	0	0	3.15525e-08	0	8.50386e-09	1.28672e-08	0	0	0	0	1.41466e-08	1.5159e-08	0	0	0	7.78177e-09	0	9.60589e-09	0	0	0	0	0	0	0	1.00284e-08	0	0	0
K08354	thiosulfate reductase cytochrome b subunit	thiosulfate reductase cytochrome b subunit	thiosulfate reductase cytochrome b subunit	0	Unclassified; Cellular Processes and Signaling; Electron transfer carriers	Unclassified	Cellular Processes and Signaling	Electron transfer carriers	0	0	0	0	0	0	0	0	0	0	0	0	0	0	0	0	0	0	0	0	1.18371e-08	0	0	0	0	0	0	2.33453e-08	0	3.84236e-08	0	0	0	0	0	0	0	0	0	0	0
K06986	None	None	None	0	Unclassified; Poorly Characterized; General function prediction only	Unclassified	Poorly Characterized	General function prediction only	0	1.68604e-08	0	0	0	0	0	0	0	0	0	1.94043e-08	0	0	3.15525e-08	0	8.50386e-09	1.28672e-08	0	0	0	0	1.41466e-08	1.5159e-08	0	9.69181e-09	0	7.78177e-09	0	9.60589e-09	0	0	0	0	0	0	0	1.00284e-08	0	0	1.48723e-08
K02442	membrane protein GlpM	membrane protein GlpM	membrane protein GlpM	0	Unclassified; Poorly Characterized; General function prediction only	Unclassified	Poorly Characterized	General function prediction only	0	0	0	0	0	0	0	0	0	0	0	0	0	0	0	0	0	0	0	0	0	0	0	0	0	0	0	0	0	0	0	0	0	0	0	0	0	0	0	0	1.48723e-08
K08299	carnitinyl-CoA dehydratase [EC:4.2.1.-]	carnitinyl-CoA dehydratase [EC:4.2.1.-]	carnitinyl-CoA dehydratase	EC:4.2.1.-	Unclassified; Metabolism; Others	Unclassified	Metabolism	Others	0	0	0	0	0	0	0	0	0	0	0	0	0	0	0	0	0	0	0	0	0	0	0	0	0	0	0	1.55635e-08	7.24216e-09	1.92118e-08	8.86264e-09	0	0	0	0	0	0	0	0	0	2.97445e-08
K02182	crotonobetaine/carnitine-CoA ligase [EC:6.2.1.-]	crotonobetaine/carnitine-CoA ligase [EC:6.2.1.-]	crotonobetaine/carnitine-CoA ligase	EC:6.2.1.-	Unclassified; Metabolism; Others	Unclassified	Metabolism	Others	0	0	0	0	0	0	0	0	0	0	0	0	0	0	0	0	8.50386e-09	0	0	0	0	0	0	0	1.49586e-08	0	0	1.55635e-08	7.24216e-09	3.84236e-08	0	0	0	0	0	0	0	0	0	0	0
K10984	PTS system, galactosamine-specific IIB component [EC:2.7.1.69]	PTS system, galactosamine-specific IIB component [EC:2.7.1.69]	PTS system, galactosamine-specific IIB component	EC:2.7.1.69	Environmental Information Processing; Membrane Transport; Phosphotransferase system (PTS)|Environmental Information Processing; Membrane Transport; Transporters|Metabolism; Carbohydrate Metabolism; Galactose metabolism	Environmental Information Processing	Membrane Transport	Phosphotransferase system (PTS)	7.6502e-08	0	0	0	3.17121e-08	0	0	0	1.58588e-08	0	0	0	0	0	0	0	0	0	0	0	0	0	0	0	0	0	0	0	0	0	0	0	0	0	0	0	0	0	0	0	1.48723e-08
K07465	putative RecB family exonuclease	putative RecB family exonuclease	putative RecB family exonuclease	0	Unclassified; Genetic Information Processing; Replication, recombination and repair proteins	Unclassified	Genetic Information Processing	Replication, recombination and repair proteins	0	1.68604e-08	0	1.17334e-08	0	0	0	0	0	0	0	1.94043e-08	0	0	3.15525e-08	0	8.50386e-09	1.28672e-08	0	0	0	0	1.41466e-08	1.5159e-08	0	0	0	7.78177e-09	0	9.60589e-09	0	0	0	0	0	0	0	1.00284e-08	0	0	0
K07466	replication factor A1	replication factor A1	replication factor A1	0	Genetic Information Processing; Replication and Repair; DNA repair and recombination proteins|Genetic Information Processing; Replication and Repair; Mismatch repair|Genetic Information Processing; Transcription; Transcription factors|Genetic Information Processing; Replication and Repair; Nucleotide excision repair|Genetic Information Processing; Replication and Repair; DNA replication|Genetic I…	Genetic Information Processing	Replication and Repair	DNA repair and recombination proteins	0	0	0	0	0	0	2.32067e-08	2.15452e-08	0	0	0	0	0	0	0	0	0	0	0	0	0	0	2.82933e-08	0	0	0	0	0	0	9.60589e-09	0	1.20023e-08	0	0	0	0	1.64863e-08	0	0	0	2.97445e-08
K07463	archaea-specific RecJ-like exonuclease	archaea-specific RecJ-like exonuclease	archaea-specific RecJ-like exonuclease	0	Unclassified; Genetic Information Processing; Replication, recombination and repair proteins	Unclassified	Genetic Information Processing	Replication, recombination and repair proteins	0	0	0	0	0	0	2.32067e-08	2.15452e-08	0	0	0	0	0	0	0	0	0	0	0	0	0	0	2.82933e-08	0	0	0	0	0	0	9.60589e-09	0	1.20023e-08	0	0	0	0	1.64863e-08	0	0	0	2.97445e-08
K10673	streptomycin 3"-kinase [EC:2.7.1.87]	streptomycin 3"-kinase [EC:2.7.1.87]	streptomycin 3"-kinase	EC:2.7.1.87	Unclassified; Metabolism; Others	Unclassified	Metabolism	Others	0	0	0	0	0	0	0	0	0	0	0	0	0	0	0	0	0	0	0	0	0	0	0	0	0	0	0	0	0	0	8.86264e-09	0	0	0	0	0	0	0	0	0	1.48723e-08
K08721	multidrug resistance outer membrane protein OprJ	multidrug resistance outer membrane protein OprJ	multidrug resistance outer membrane protein OprJ	0	Unclassified; Cellular Processes and Signaling; Pores ion channels	Unclassified	Cellular Processes and Signaling	Pores ion channels	1.27503e-08	0	0	0	0	0	0	0	0	0	0	0	1.09115e-08	4.67992e-08	0	0	1.70077e-08	2.57344e-08	0	0	0	1.78886e-08	0	0	1.49586e-08	9.69181e-09	0	7.78177e-09	0	9.60589e-09	0	0	0	0	0	0	0	1.00284e-08	1.15533e-08	2.35782e-08	2.97445e-08
K00446	catechol 2,3-dioxygenase [EC:1.13.11.2]	catechol 2,3-dioxygenase [EC:1.13.11.2]	catechol 2,3-dioxygenase	EC:1.13.11.2	Metabolism; Xenobiotics Biodegradation and Metabolism; Xylene degradation|Metabolism; Xenobiotics Biodegradation and Metabolism; Chlorocyclohexane and chlorobenzene degradation|Metabolism; Xenobiotics Biodegradation and Metabolism; Styrene degradation|Metabolism; Xenobiotics Biodegradation and Metabolism; Benzoate degradation	Metabolism	Xenobiotics Biodegradation and Metabolism	Xylene degradation	0	0	0	0	0	1.08042e-08	0	0	0	0	0	0	0	0	0	0	8.50386e-09	0	0	0	0	0	0	0	0	0	0	0	0	0	0	0	0	0	0	0	0	0	0	0	0
K03396	S-(hydroxymethyl)glutathione synthase [EC:4.4.1.22]	S-(hydroxymethyl)glutathione synthase [EC:4.4.1.22]	S-(hydroxymethyl)glutathione synthase	EC:4.4.1.22	Metabolism; Energy Metabolism; Methane metabolism	Metabolism	Energy Metabolism	Methane metabolism	0	0	0	0	0	0	0	0	0	0	0	0	0	0	0	0	0	0	0	0	0	0	0	0	0	0	0	0	0	0	8.86264e-09	0	0	0	0	0	0	0	0	0	1.48723e-08
K12136	hydrogenase-4 component A [EC:1.-.-.-]	hydrogenase-4 component A [EC:1.-.-.-]	hydrogenase-4 component A	EC:1.-.-.-	Unclassified; Metabolism; Energy metabolism	Unclassified	Metabolism	Energy metabolism	0	0	0	0	0	0	0	0	0	0	0	0	0	0	0	0	0	1.28672e-08	0	0	0	0	0	0	0	0	0	1.55635e-08	0	2.88177e-08	0	0	0	0	0	0	0	0	0	0	0
K12139	hydrogenase-4 component D [EC:1.-.-.-]	hydrogenase-4 component D [EC:1.-.-.-]	hydrogenase-4 component D	EC:1.-.-.-	Unclassified; Metabolism; Energy metabolism	Unclassified	Metabolism	Energy metabolism	0	0	0	0	0	1.08042e-08	0	0	0	0	0	1.94043e-08	0	0	1.05175e-08	0	8.50386e-09	1.28672e-08	0	0	0	1.78886e-08	1.41466e-08	0	0	0	0	1.55635e-08	0	1.92118e-08	0	6.00113e-09	0	0	0	0	0	0	0	1.17891e-08	1.48723e-08
K11444	two-component system, chemotaxis family, response regulator WspR [EC:2.7.7.65]	two-component system, chemotaxis family, response regulator WspR [EC:2.7.7.65]	two-component system, chemotaxis family, response regulator WspR	EC:2.7.7.65	Environmental Information Processing; Signal Transduction; Two-component system	Environmental Information Processing	Signal Transduction	Two-component system	0	0	0	0	0	0	0	0	0	0	0	0	0	0	0	0	0	0	0	0	0	0	0	0	0	0	0	0	0	0	0	0	0	0	0	0	0	0	0	0	1.48723e-08
K11442	putative uridylyltransferase [EC:2.7.7.-]	putative uridylyltransferase [EC:2.7.7.-]	putative uridylyltransferase	EC:2.7.7.-	Unclassified; Metabolism; Carbohydrate metabolism	Unclassified	Metabolism	Carbohydrate metabolism	0	0	2.07403e-08	0	0	0	0	0	0	0	0	0	0	0	0	0	8.50386e-09	0	0	0	0	0	0	0	0	0	0	0	0	1.92118e-08	0	0	0	0	0	0	0	0	0	0	0
K10240	cellobiose transport system substrate-binding protein	cellobiose transport system substrate-binding protein	cellobiose transport system substrate-binding protein	0	Environmental Information Processing; Membrane Transport; ABC transporters|Environmental Information Processing; Membrane Transport; Transporters	Environmental Information Processing	Membrane Transport	ABC transporters	0	0	0	0	0	0	0	0	0	0	0	0	0	0	0	0	0	0	0	0	0	0	0	0	0	0	0	0	0	0	0	0	0	0	0	0	0	0	0	0	0
K10241	cellobiose transport system permease protein	cellobiose transport system permease protein	cellobiose transport system permease protein	0	Environmental Information Processing; Membrane Transport; ABC transporters|Environmental Information Processing; Membrane Transport; Transporters	Environmental Information Processing	Membrane Transport	ABC transporters	0	0	0	0	0	0	0	0	0	0	0	0	0	0	0	0	0	0	0	0	0	0	0	0	0	0	0	0	0	0	0	0	0	0	0	0	0	0	0	0	0
K04110	benzoate-CoA ligase [EC:6.2.1.25]	benzoate-CoA ligase [EC:6.2.1.25]	benzoate-CoA ligase	EC:6.2.1.25	Metabolism; Xenobiotics Biodegradation and Metabolism; Aminobenzoate degradation|Metabolism; Xenobiotics Biodegradation and Metabolism; Benzoate degradation	Metabolism	Xenobiotics Biodegradation and Metabolism	Aminobenzoate degradation	1.27503e-08	0	0	0	0	0	0	0	0	0	0	0	1.09115e-08	4.67992e-08	0	0	1.70077e-08	2.57344e-08	0	0	0	1.78886e-08	0	0	1.49586e-08	0	0	7.78177e-09	0	9.60589e-09	0	0	0	0	0	0	0	1.00284e-08	1.15533e-08	2.35782e-08	2.97445e-08
K09934	hypothetical protein	hypothetical protein	hypothetical protein	0	Unclassified; Poorly Characterized; Function unknown	Unclassified	Poorly Characterized	Function unknown	0	0	0	0	0	0	0	0	0	0	0	0	0	0	0	0	0	0	0	0	0	0	0	0	0	0	0	0	0	0	0	0	0	0	0	0	0	0	0	0	1.48723e-08
K06216	putative ribose uptake protein	putative ribose uptake protein	putative ribose uptake protein	0	Unclassified; Cellular Processes and Signaling; Other ion-coupled transporters	Unclassified	Cellular Processes and Signaling	Other ion-coupled transporters	0	0	0	0	0	0	0	0	0	0	0	0	0	0	4.207e-08	0	0	1.28672e-08	1.11979e-08	1.14942e-08	0	0	0	0	1.49586e-08	0	0	0	7.24216e-09	9.60589e-09	0	0	0	0	0	0	1.64863e-08	0	0	0	0
K01707	5-dehydro-4-deoxyglucarate dehydratase [EC:4.2.1.41]	5-dehydro-4-deoxyglucarate dehydratase [EC:4.2.1.41]	5-dehydro-4-deoxyglucarate dehydratase	EC:4.2.1.41	Metabolism; Carbohydrate Metabolism; Ascorbate and aldarate metabolism	Metabolism	Carbohydrate Metabolism	Ascorbate and aldarate metabolism	1.27503e-08	0	0	0	0	1.08042e-08	0	0	0	0	0	0	1.09115e-08	7.01987e-08	0	0	1.70077e-08	2.57344e-08	0	0	0	1.78886e-08	0	0	0	0	0	0	0	0	0	0	0	0	0	0	1.64863e-08	1.00284e-08	1.15533e-08	2.35782e-08	4.46168e-08
K14166	copper transport protein	copper transport protein	copper transport protein	0	Unclassified; Cellular Processes and Signaling; Other transporters	Unclassified	Cellular Processes and Signaling	Other transporters	0	0	2.07403e-08	0	0	0	0	0	0	0	0	0	0	0	0	0	8.50386e-09	0	0	0	0	0	0	0	0	0	0	0	0	9.60589e-09	8.86264e-09	0	0	0	0	0	0	0	0	1.17891e-08	1.48723e-08
K06860	None	None	None	0	Unclassified; Poorly Characterized; General function prediction only	Unclassified	Poorly Characterized	General function prediction only	0	1.68604e-08	0	1.17334e-08	0	0	0	0	0	0	0	1.94043e-08	0	0	3.15525e-08	0	8.50386e-09	1.28672e-08	0	0	0	0	1.41466e-08	1.5159e-08	0	0	0	7.78177e-09	0	9.60589e-09	0	0	0	0	0	2.99643e-08	0	2.00568e-08	0	0	0
K13686	arabinofuranosyltransferase [EC:2.4.2.-]	arabinofuranosyltransferase [EC:2.4.2.-]	arabinofuranosyltransferase	EC:2.4.2.-	Metabolism; Glycan Biosynthesis and Metabolism; Glycosyltransferases	Metabolism	Glycan Biosynthesis and Metabolism	Glycosyltransferases	0	1.68604e-08	0	0	0	0	0	0	0	0	0	1.94043e-08	0	0	3.15525e-08	0	8.50386e-09	1.28672e-08	0	0	0	0	1.41466e-08	1.5159e-08	0	0	0	7.78177e-09	0	9.60589e-09	0	0	0	0	0	0	0	1.00284e-08	0	0	0
K14159	ribonuclease HI / DNA polymerase III subunit epsilon [EC:3.1.26.4 2.7.7.7]	ribonuclease HI / DNA polymerase III subunit epsilon [EC:3.1.26.4 2.7.7.7]	ribonuclease HI / DNA polymerase III subunit epsilon	EC:3.1.26.4	Metabolism; Nucleotide Metabolism; Pyrimidine metabolism|Genetic Information Processing; Replication and Repair; DNA repair and recombination proteins|Metabolism; Nucleotide Metabolism; Purine metabolism|Genetic Information Processing; Replication and Repair; Mismatch repair|Genetic Information Processing; Replication and Repair; Homologous recombination|Genetic Information Processing; Replicatio…	Metabolism	Nucleotide Metabolism	Pyrimidine metabolism	0	0	0	0	0	0	0	0	0	0	0	0	0	2.33996e-08	0	0	0	0	0	0	0	0	0	0	0	0	0	0	0	0	0	0	0	0	0	0	0	0	0	0	0
K13531	methylated-DNA-[protein]-cysteine S-methyltransferase [EC:2.1.1.63]	methylated-DNA-[protein]-cysteine S-methyltransferase [EC:2.1.1.63]	methylated-DNA-[protein]-cysteine S-methyltransferase	EC:2.1.1.63	Genetic Information Processing; Replication and Repair; DNA repair and recombination proteins	Genetic Information Processing	Replication and Repair	DNA repair and recombination proteins	0	0	0	0	0	0	0	0	0	0	0	0	1.09115e-08	0	4.207e-08	0	0	1.28672e-08	1.11979e-08	1.14942e-08	0	0	0	0	1.49586e-08	0	0	0	7.24216e-09	9.60589e-09	0	0	0	0	0	0	1.64863e-08	0	0	1.17891e-08	0
K13530	AraC family transcriptional regulator, regulatory protein of adaptative response / methylphosphotriester-DNA alkyltransferase methyltransferase [EC:2.1.1.-]	AraC family transcriptional regulator, regulatory protein of adaptative response / methylphosphotriester-DNA alkyltransferase methyltransferase [EC:2.1.1.-]	AraC family transcriptional regulator, regulatory protein of adaptative response / methylphosphotriester-DNA alkyltransferase methyltransferase	EC:2.1.1.-	Genetic Information Processing; Transcription; Transcription factors|Genetic Information Processing; Replication and Repair; DNA repair and recombination proteins	Genetic Information Processing	Transcription	Transcription factors	0	0	0	0	0	0	0	0	0	0	0	0	0	0	4.207e-08	0	0	1.28672e-08	1.11979e-08	1.14942e-08	0	0	0	0	1.49586e-08	0	0	0	7.24216e-09	9.60589e-09	0	0	0	0	0	0	1.64863e-08	0	0	1.17891e-08	0
K14060	putative DNA-invertase from lambdoid prophage Rac	putative DNA-invertase from lambdoid prophage Rac	putative DNA-invertase from lambdoid prophage Rac	0	Unclassified; Genetic Information Processing; Replication, recombination and repair proteins	Unclassified	Genetic Information Processing	Replication, recombination and repair proteins	0	0	0	0	0	0	0	0	0	0	0	0	0	0	0	0	0	0	0	0	0	0	0	0	0	0	0	0	0	0	0	0	0	0	0	0	0	0	0	0	1.48723e-08
K00693	glycogen(starch) synthase [EC:2.4.1.11]	glycogen(starch) synthase [EC:2.4.1.11]	glycogen(starch) synthase	EC:2.4.1.11	Metabolism; Glycan Biosynthesis and Metabolism; Glycosyltransferases|Metabolism; Carbohydrate Metabolism; Starch and sucrose metabolism|Organismal Systems; Endocrine System; Insulin signaling pathway	Metabolism	Glycan Biosynthesis and Metabolism	Glycosyltransferases	2.55007e-08	5.05811e-08	2.07403e-08	1.17334e-08	0	0	5.80167e-08	9.69533e-08	4.75763e-08	3.68427e-08	0	0	0	0	1.05175e-08	0	0	1.28672e-08	0	1.14942e-08	0	1.78886e-08	2.82933e-08	3.03181e-08	0	9.69181e-09	1.91129e-08	7.78177e-09	0	0	1.77253e-08	0	0	2.84464e-08	0	0	0	0	1.15533e-08	1.17891e-08	0
K10228	sorbitol/mannitol transport system permease protein	sorbitol/mannitol transport system permease protein	sorbitol/mannitol transport system permease protein	0	Environmental Information Processing; Membrane Transport; ABC transporters|Environmental Information Processing; Membrane Transport; Transporters	Environmental Information Processing	Membrane Transport	ABC transporters	1.27503e-08	0	0	0	0	0	0	0	0	0	0	0	1.09115e-08	4.67992e-08	0	0	8.50386e-09	2.57344e-08	0	0	0	1.78886e-08	0	0	0	0	0	7.78177e-09	0	0	1.77253e-08	0	0	0	0	0	1.64863e-08	1.00284e-08	2.31067e-08	2.35782e-08	5.9489e-08
K10229	sorbitol/mannitol transport system permease protein	sorbitol/mannitol transport system permease protein	sorbitol/mannitol transport system permease protein	0	Environmental Information Processing; Membrane Transport; ABC transporters|Environmental Information Processing; Membrane Transport; Transporters	Environmental Information Processing	Membrane Transport	ABC transporters	1.27503e-08	0	0	0	0	0	0	0	0	0	0	0	1.09115e-08	4.67992e-08	0	0	8.50386e-09	2.57344e-08	0	0	0	1.78886e-08	0	0	0	0	0	7.78177e-09	0	0	1.77253e-08	0	0	0	0	0	0	1.00284e-08	2.31067e-08	2.35782e-08	5.9489e-08
K10227	sorbitol/mannitol transport system substrate-binding protein	sorbitol/mannitol transport system substrate-binding protein	sorbitol/mannitol transport system substrate-binding protein	0	Environmental Information Processing; Membrane Transport; ABC transporters|Environmental Information Processing; Membrane Transport; Transporters	Environmental Information Processing	Membrane Transport	ABC transporters	1.27503e-08	0	0	0	0	0	0	0	0	0	0	0	1.09115e-08	4.67992e-08	0	0	8.50386e-09	2.57344e-08	0	0	0	1.78886e-08	0	0	0	0	0	7.78177e-09	7.24216e-09	9.60589e-09	1.77253e-08	0	0	0	0	0	1.64863e-08	1.00284e-08	2.31067e-08	2.35782e-08	7.43613e-08
K08164	MFS transporter, DHA1 family, chloramphenicol resistance protein	MFS transporter, DHA1 family, chloramphenicol resistance protein	MFS transporter, DHA1 family, chloramphenicol resistance protein	0	Environmental Information Processing; Membrane Transport; Transporters	Environmental Information Processing	Membrane Transport	Transporters	0	0	0	0	0	0	0	0	0	0	0	0	0	0	0	0	0	0	0	0	0	0	0	0	0	0	0	0	0	0	8.86264e-09	0	0	0	0	0	0	0	0	1.17891e-08	1.48723e-08
K02497	HemX protein	HemX protein	HemX protein	0	Unclassified; Cellular Processes and Signaling; Membrane and intracellular structural molecules	Unclassified	Cellular Processes and Signaling	Membrane and intracellular structural molecules	0	0	2.07403e-08	0	0	0	0	0	0	0	0	0	0	0	0	0	8.50386e-09	0	0	0	0	0	0	0	0	0	0	0	0	1.92118e-08	0	0	0	0	0	0	0	0	0	0	0
K02234	cobalamin biosynthesis protein CobW	cobalamin biosynthesis protein CobW	cobalamin biosynthesis protein CobW	0	Metabolism; Metabolism of Cofactors and Vitamins; Porphyrin and chlorophyll metabolism	Metabolism	Metabolism of Cofactors and Vitamins	Porphyrin and chlorophyll metabolism	1.27503e-08	0	0	0	0	0	0	0	0	0	0	0	1.09115e-08	4.67992e-08	0	0	8.50386e-09	2.57344e-08	0	0	0	1.78886e-08	1.41466e-08	0	0	0	0	0	0	0	1.77253e-08	6.00113e-09	0	0	0	0	1.64863e-08	1.00284e-08	1.15533e-08	3.53673e-08	7.43613e-08
K11898	type VI secretion system protein ImpE	type VI secretion system protein ImpE	type VI secretion system protein ImpE	0	Environmental Information Processing; Membrane Transport; Secretion system	Environmental Information Processing	Membrane Transport	Secretion system	1.27503e-08	0	0	0	0	0	0	0	0	0	0	0	1.09115e-08	4.67992e-08	0	0	8.50386e-09	2.57344e-08	0	0	0	0	0	0	0	0	0	0	0	0	0	0	0	0	0	0	0	1.00284e-08	1.15533e-08	2.35782e-08	2.97445e-08
K11897	type VI secretion system protein ImpF	type VI secretion system protein ImpF	type VI secretion system protein ImpF	0	Environmental Information Processing; Membrane Transport; Secretion system	Environmental Information Processing	Membrane Transport	Secretion system	1.27503e-08	0	0	0	0	0	0	0	0	0	0	0	1.09115e-08	4.67992e-08	0	0	8.50386e-09	2.57344e-08	0	0	0	0	0	0	0	0	0	7.78177e-09	0	0	8.86264e-09	0	0	0	0	0	0	1.00284e-08	1.15533e-08	2.35782e-08	4.46168e-08
K04337	curli production assembly/transport component CsgE	curli production assembly/transport component CsgE	curli production assembly/transport component CsgE	0	Environmental Information Processing; Membrane Transport; Secretion system	Environmental Information Processing	Membrane Transport	Secretion system	0	0	0	0	0	0	0	0	0	0	0	0	0	0	0	0	0	0	0	0	0	0	0	0	0	0	0	0	0	0	0	0	0	0	0	0	0	0	0	0	0
K10208	dehydrosqualene synthase [EC:2.5.1.-]	dehydrosqualene synthase [EC:2.5.1.-]	dehydrosqualene synthase	EC:2.5.1.-	Metabolism; Metabolism of Terpenoids and Polyketides; Prenyltransferases|Metabolism; Metabolism of Terpenoids and Polyketides; Carotenoid biosynthesis	Metabolism	Metabolism of Terpenoids and Polyketides	Prenyltransferases	0	0	2.07403e-08	0	0	0	0	0	0	0	0	0	0	0	0	0	8.50386e-09	0	0	0	0	0	0	0	0	0	0	0	0	9.60589e-09	0	0	0	0	0	0	0	0	0	0	0
K10209	dehydrosqualene desaturase [EC:1.14.99.-]	dehydrosqualene desaturase [EC:1.14.99.-]	dehydrosqualene desaturase	EC:1.14.99.-	Metabolism; Metabolism of Terpenoids and Polyketides; Carotenoid biosynthesis	Metabolism	Metabolism of Terpenoids and Polyketides	Carotenoid biosynthesis	0	0	2.07403e-08	0	0	0	0	0	0	0	0	0	0	0	0	0	8.50386e-09	0	0	0	0	0	0	0	0	0	0	0	0	9.60589e-09	0	0	0	0	0	0	0	0	0	0	0
K00217	maleylacetate reductase [EC:1.3.1.32]	maleylacetate reductase [EC:1.3.1.32]	maleylacetate reductase	EC:1.3.1.32	Metabolism; Xenobiotics Biodegradation and Metabolism; Toluene degradation|Metabolism; Xenobiotics Biodegradation and Metabolism; Chlorocyclohexane and chlorobenzene degradation|Metabolism; Xenobiotics Biodegradation and Metabolism; Fluorobenzoate degradation|Metabolism; Xenobiotics Biodegradation and Metabolism; Benzoate degradation	Metabolism	Xenobiotics Biodegradation and Metabolism	Toluene degradation	0	0	0	0	0	0	0	0	0	0	0	0	0	0	0	0	0	0	0	0	0	0	0	0	0	0	0	0	0	9.60589e-09	0	0	0	0	0	0	0	0	0	0	1.48723e-08
K13472	sulfotransferase	sulfotransferase	sulfotransferase	0	Organismal Systems; Environmental Adaptation; Plant-pathogen interaction	Organismal Systems	Environmental Adaptation	Plant-pathogen interaction	0	0	0	0	0	0	0	0	0	0	0	0	0	0	0	0	0	0	0	0	0	0	0	0	0	0	0	0	0	0	0	0	0	0	0	0	0	0	0	0	0
K06026	None	None	None	0	Unclassified; Metabolism; Others	Unclassified	Metabolism	Others	2.55007e-08	5.05811e-08	2.07403e-08	1.17334e-08	0	0	5.80167e-08	9.69533e-08	4.75763e-08	3.68427e-08	0	0	0	0	1.05175e-08	0	0	1.28672e-08	0	1.14942e-08	0	1.78886e-08	2.82933e-08	3.03181e-08	0	9.69181e-09	1.91129e-08	7.78177e-09	0	0	1.77253e-08	0	0	2.84464e-08	0	0	0	0	1.15533e-08	1.17891e-08	0
K09744	hypothetical protein	hypothetical protein	hypothetical protein	0	Unclassified; Poorly Characterized; Function unknown	Unclassified	Poorly Characterized	Function unknown	0	0	0	2.34669e-08	0	0	0	0	3.17175e-08	3.68427e-08	0	0	0	0	2.1035e-08	0	0	0	0	0	0	0	0	0	0	0	3.82259e-08	0	1.44843e-08	1.92118e-08	0	0	0	0	0	0	4.9459e-08	0	0	0	5.9489e-08
K06351	inhibitor of KinA	inhibitor of KinA	inhibitor of KinA	0	Unclassified; Cellular Processes and Signaling; Sporulation	Unclassified	Cellular Processes and Signaling	Sporulation	0	0	0	0	0	0	0	0	0	0	0	0	0	2.33996e-08	0	0	0	0	0	0	0	0	0	0	0	0	0	0	0	0	0	0	0	0	0	0	0	1.00284e-08	0	1.17891e-08	1.48723e-08
K14338	cytochrome P450 / NADPH-cytochrome P450 reductase [EC:1.14.14.1 1.6.2.4]	cytochrome P450 / NADPH-cytochrome P450 reductase [EC:1.14.14.1 1.6.2.4]	cytochrome P450 / NADPH-cytochrome P450 reductase	EC:1.14.14.1	Metabolism; Xenobiotics Biodegradation and Metabolism; Aminobenzoate degradation|Metabolism; Amino Acid Metabolism; Tryptophan metabolism|Metabolism; Lipid Metabolism; Fatty acid metabolism	Metabolism	Xenobiotics Biodegradation and Metabolism	Aminobenzoate degradation	0	0	0	0	0	0	0	0	0	0	0	0	0	0	0	0	0	0	0	0	0	0	0	0	0	0	0	0	7.24216e-09	9.60589e-09	0	0	0	0	0	0	0	0	0	0	1.48723e-08
K14339	alpha-1,6-mannosyltransferase [EC:2.4.1.-]	alpha-1,6-mannosyltransferase [EC:2.4.1.-]	alpha-1,6-mannosyltransferase	EC:2.4.1.-	Metabolism; Glycan Biosynthesis and Metabolism; Glycosyltransferases	Metabolism	Glycan Biosynthesis and Metabolism	Glycosyltransferases	0	1.68604e-08	0	0	0	0	0	0	0	0	0	1.94043e-08	0	0	3.15525e-08	0	8.50386e-09	1.28672e-08	0	0	0	0	1.41466e-08	1.5159e-08	0	0	0	7.78177e-09	0	9.60589e-09	0	0	0	0	0	0	0	1.00284e-08	0	0	0
K14335	alpha-1,6-mannosyltransferase [EC:2.4.1.-]	alpha-1,6-mannosyltransferase [EC:2.4.1.-]	alpha-1,6-mannosyltransferase	EC:2.4.1.-	Metabolism; Glycan Biosynthesis and Metabolism; Glycosyltransferases	Metabolism	Glycan Biosynthesis and Metabolism	Glycosyltransferases	0	0	0	0	0	0	0	0	0	0	0	0	1.09115e-08	2.33996e-08	1.05175e-08	0	0	0	0	0	0	0	0	0	0	0	0	0	0	0	0	0	0	0	1.37165e-08	0	0	0	0	2.35782e-08	1.48723e-08
K14337	alpha-1,6-mannosyltransferase [EC:2.4.1.-]	alpha-1,6-mannosyltransferase [EC:2.4.1.-]	alpha-1,6-mannosyltransferase	EC:2.4.1.-	Metabolism; Glycan Biosynthesis and Metabolism; Glycosyltransferases	Metabolism	Glycan Biosynthesis and Metabolism	Glycosyltransferases	0	1.68604e-08	0	0	0	0	0	0	0	0	0	1.94043e-08	0	0	3.15525e-08	0	8.50386e-09	1.28672e-08	0	0	0	0	1.41466e-08	1.5159e-08	0	0	0	7.78177e-09	0	9.60589e-09	0	0	0	0	0	0	0	1.00284e-08	0	0	0
K14333	2,3-dihydroxybenzoate decarboxylase [EC:4.1.1.46]	2,3-dihydroxybenzoate decarboxylase [EC:4.1.1.46]	2,3-dihydroxybenzoate decarboxylase	EC:4.1.1.46	Metabolism; Xenobiotics Biodegradation and Metabolism; Aminobenzoate degradation|Metabolism; Xenobiotics Biodegradation and Metabolism; Benzoate degradation	Metabolism	Xenobiotics Biodegradation and Metabolism	Aminobenzoate degradation	0	0	0	0	0	0	0	0	0	0	0	0	0	0	0	0	8.50386e-09	0	0	0	0	0	0	0	1.49586e-08	0	0	0	0	9.60589e-09	8.86264e-09	0	0	0	0	0	0	0	0	0	1.48723e-08
K08280	lipopolysaccharide O-acetyltransferase [EC:2.3.1.-]	lipopolysaccharide O-acetyltransferase [EC:2.3.1.-]	lipopolysaccharide O-acetyltransferase	EC:2.3.1.-	Metabolism; Glycan Biosynthesis and Metabolism; Lipopolysaccharide biosynthesis proteins	Metabolism	Glycan Biosynthesis and Metabolism	Lipopolysaccharide biosynthesis proteins	0	0	0	0	0	0	0	0	0	0	0	0	0	2.33996e-08	0	0	0	0	0	0	0	0	0	0	0	0	0	0	0	0	0	0	0	0	0	0	0	1.00284e-08	0	1.17891e-08	1.48723e-08
K12993	alpha-1,2-rhamnosyltransferase [EC:2.4.1.-]	alpha-1,2-rhamnosyltransferase [EC:2.4.1.-]	alpha-1,2-rhamnosyltransferase	EC:2.4.1.-	Metabolism; Glycan Biosynthesis and Metabolism; Glycosyltransferases|Metabolism; Glycan Biosynthesis and Metabolism; Lipopolysaccharide biosynthesis proteins	Metabolism	Glycan Biosynthesis and Metabolism	Glycosyltransferases	0	0	0	0	0	0	0	0	0	0	0	0	0	0	0	0	0	0	0	0	0	0	0	0	0	0	0	0	0	0	0	0	0	0	0	0	0	0	0	0	1.48723e-08
K12991	rhamnosyltransferase [EC:2.4.1.-]	rhamnosyltransferase [EC:2.4.1.-]	rhamnosyltransferase	EC:2.4.1.-	Metabolism; Glycan Biosynthesis and Metabolism; Glycosyltransferases|Metabolism; Glycan Biosynthesis and Metabolism; Lipopolysaccharide biosynthesis proteins	Metabolism	Glycan Biosynthesis and Metabolism	Glycosyltransferases	0	0	0	0	0	0	0	0	0	0	0	0	0	0	0	0	0	0	0	0	0	0	0	0	0	0	0	0	0	0	0	0	0	0	0	0	0	0	0	0	1.48723e-08
K12994	alpha-1,3-rhamnosyltransferase [EC:2.4.1.-]	alpha-1,3-rhamnosyltransferase [EC:2.4.1.-]	alpha-1,3-rhamnosyltransferase	EC:2.4.1.-	Metabolism; Glycan Biosynthesis and Metabolism; Glycosyltransferases|Metabolism; Glycan Biosynthesis and Metabolism; Lipopolysaccharide biosynthesis proteins	Metabolism	Glycan Biosynthesis and Metabolism	Glycosyltransferases	1.27503e-08	0	0	0	0	0	0	0	0	0	0	0	1.09115e-08	4.67992e-08	0	0	8.50386e-09	2.57344e-08	0	0	0	1.78886e-08	0	0	0	0	0	0	7.24216e-09	0	0	0	0	0	0	0	0	1.00284e-08	1.15533e-08	2.35782e-08	4.46168e-08
K01906	6-carboxyhexanoate--CoA ligase [EC:6.2.1.14]	6-carboxyhexanoate--CoA ligase [EC:6.2.1.14]	6-carboxyhexanoate--CoA ligase	EC:6.2.1.14	Metabolism; Metabolism of Cofactors and Vitamins; Biotin metabolism	Metabolism	Metabolism of Cofactors and Vitamins	Biotin metabolism	0	0	0	0	0	0	0	0	0	0	0	0	0	0	0	0	8.50386e-09	0	0	0	0	0	0	0	1.49586e-08	0	0	0	0	9.60589e-09	0	0	0	0	0	0	0	0	0	0	0
K06597	chemosensory pili system protein ChpB (putative protein-glutamate methylesterase)	chemosensory pili system protein ChpB (putative protein-glutamate methylesterase)	chemosensory pili system protein ChpB (putative protein-glutamate methylesterase)	0	Cellular Processes; Cell Motility; Bacterial motility proteins|Environmental Information Processing; Signal Transduction; Two-component system	Cellular Processes	Cell Motility	Bacterial motility proteins	0	0	0	0	1.05707e-08	0	0	0	0	0	0	0	0	2.33996e-08	0	0	8.50386e-09	0	0	0	0	0	0	0	0	0	0	0	0	0	0	0	0	0	1.37165e-08	0	0	0	1.15533e-08	1.17891e-08	0
K14585	trans-o-hydroxybenzylidenepyruvate hydratase-aldolase [EC:4.1.2.45]	trans-o-hydroxybenzylidenepyruvate hydratase-aldolase [EC:4.1.2.45]	trans-o-hydroxybenzylidenepyruvate hydratase-aldolase	EC:4.1.2.45	Metabolism; Xenobiotics Biodegradation and Metabolism; Naphthalene degradation	Metabolism	Xenobiotics Biodegradation and Metabolism	Naphthalene degradation	1.27503e-08	0	0	0	0	0	0	0	0	0	0	0	1.09115e-08	4.67992e-08	0	0	8.50386e-09	2.57344e-08	0	0	0	0	0	0	0	0	0	0	0	0	0	0	0	0	0	0	0	1.00284e-08	1.15533e-08	2.35782e-08	2.97445e-08
K14582	cis-1,2-dihydro-1,2-dihydroxynaphthalene/dibenzothiophene dihydrodiol dehydrogenase [EC:1.3.1.29 1.3.1.60]	cis-1,2-dihydro-1,2-dihydroxynaphthalene/dibenzothiophene dihydrodiol dehydrogenase [EC:1.3.1.29 1.3.1.60]	cis-1,2-dihydro-1,2-dihydroxynaphthalene/dibenzothiophene dihydrodiol dehydrogenase	EC:1.3.1.29	Metabolism; Xenobiotics Biodegradation and Metabolism; Polycyclic aromatic hydrocarbon degradation|Metabolism; Xenobiotics Biodegradation and Metabolism; Naphthalene degradation	Metabolism	Xenobiotics Biodegradation and Metabolism	Polycyclic aromatic hydrocarbon degradation	0	0	0	0	0	1.08042e-08	0	0	0	0	0	0	0	0	0	0	8.50386e-09	0	0	0	0	0	0	0	0	0	0	0	0	0	0	0	0	0	0	0	0	0	0	0	0
K10019	octopine/nopaline transport system permease protein	octopine/nopaline transport system permease protein	octopine/nopaline transport system permease protein	0	Environmental Information Processing; Membrane Transport; ABC transporters|Environmental Information Processing; Membrane Transport; Transporters	Environmental Information Processing	Membrane Transport	ABC transporters	0	0	0	0	0	0	0	0	0	0	0	0	0	0	0	0	0	0	0	0	0	0	0	0	0	0	0	0	0	0	8.86264e-09	0	0	0	0	0	0	0	0	0	1.48723e-08
K01461	N-acyl-D-glutamate deacylase [EC:3.5.1.82]	N-acyl-D-glutamate deacylase [EC:3.5.1.82]	N-acyl-D-glutamate deacylase	EC:3.5.1.82	Unclassified; Metabolism; Others	Unclassified	Metabolism	Others	0	0	0	0	0	0	0	0	0	0	0	0	0	0	0	0	8.50386e-09	0	0	0	0	0	0	0	1.49586e-08	0	0	0	0	9.60589e-09	8.86264e-09	0	0	0	0	0	0	0	0	0	1.48723e-08
K05549	benzoate 1,2-dioxygenase alpha subunit [EC:1.14.12.10]	benzoate 1,2-dioxygenase alpha subunit [EC:1.14.12.10]	benzoate 1,2-dioxygenase alpha subunit	EC:1.14.12.10	Metabolism; Xenobiotics Biodegradation and Metabolism; Fluorobenzoate degradation|Metabolism; Xenobiotics Biodegradation and Metabolism; Benzoate degradation	Metabolism	Xenobiotics Biodegradation and Metabolism	Fluorobenzoate degradation	0	0	0	0	0	0	0	0	0	0	0	0	0	0	0	0	0	0	0	0	0	1.78886e-08	0	0	0	9.69181e-09	0	0	0	0	0	0	0	0	0	0	1.64863e-08	0	0	0	1.48723e-08
K05548	MFS transporter, AAHS family, benzoate transport protein	MFS transporter, AAHS family, benzoate transport protein	MFS transporter, AAHS family, benzoate transport protein	0	Environmental Information Processing; Membrane Transport; Transporters	Environmental Information Processing	Membrane Transport	Transporters	0	0	0	0	0	0	0	0	0	0	0	0	0	0	0	0	0	0	0	0	0	0	0	0	0	0	0	0	0	0	0	0	0	0	0	0	0	0	0	0	0
K11629	two-component system, OmpR family, bacitracin resistance sensor histidine kinase BceS [EC:2.7.13.3]	two-component system, OmpR family, bacitracin resistance sensor histidine kinase BceS [EC:2.7.13.3]	two-component system, OmpR family, bacitracin resistance sensor histidine kinase BceS	EC:2.7.13.3	Metabolism; Enzyme Families; Protein kinases|Environmental Information Processing; Signal Transduction; Two-component system	Metabolism	Enzyme Families	Protein kinases	0	0	2.07403e-08	0	0	0	0	0	0	0	0	0	0	0	0	0	8.50386e-09	0	0	0	0	0	0	0	0	0	0	0	0	1.92118e-08	0	0	0	0	0	0	0	0	0	0	0
K09925	hypothetical protein	hypothetical protein	hypothetical protein	0	Unclassified; Poorly Characterized; Function unknown	Unclassified	Poorly Characterized	Function unknown	1.27503e-08	0	0	0	0	0	0	0	0	0	0	0	1.09115e-08	4.67992e-08	0	0	8.50386e-09	2.57344e-08	0	0	0	0	0	0	0	0	0	0	0	0	0	0	0	0	0	0	0	1.00284e-08	1.15533e-08	2.35782e-08	2.97445e-08
K10716	voltage-gated potassium channel	voltage-gated potassium channel	voltage-gated potassium channel	0	Unclassified; Cellular Processes and Signaling; Pores ion channels	Unclassified	Cellular Processes and Signaling	Pores ion channels	0	0	0	0	0	0	0	0	0	0	0	0	0	0	0	0	8.50386e-09	0	0	0	0	1.78886e-08	0	0	1.49586e-08	0	0	1.55635e-08	0	2.88177e-08	0	0	0	0	1.37165e-08	0	0	0	0	0	0
K10715	two-component system, sensor histidine kinase [EC:2.7.13.3]; two-component system, sensor histidine kinase RpfC [EC:2.7.13.3]	two-component system, sensor histidine kinase [EC:2.7.13.3]; two-component system, sensor histidine kinase RpfC [EC:2.7.13.3]	two-component system, sensor histidine kinase	EC:2.7.13.3	Metabolism; Enzyme Families; Protein kinases|Environmental Information Processing; Signal Transduction; Two-component system	Metabolism	Enzyme Families	Protein kinases	0	0	0	0	1.05707e-08	0	0	0	0	0	0	0	0	2.33996e-08	0	0	8.50386e-09	0	0	0	0	0	0	0	0	0	0	0	0	0	0	0	0	0	1.37165e-08	0	0	0	1.15533e-08	1.17891e-08	0
K07785	MFS transporter, NRE family, putaive nickel resistance protein	MFS transporter, NRE family, putaive nickel resistance protein	MFS transporter, NRE family, putaive nickel resistance protein	0	Environmental Information Processing; Membrane Transport; Transporters|Environmental Information Processing; Signal Transduction; Two-component system	Environmental Information Processing	Membrane Transport	Transporters	0	0	0	0	0	0	0	0	0	0	0	0	0	0	0	0	0	0	0	0	0	0	0	0	0	0	0	0	0	0	8.86264e-09	0	0	0	0	0	0	0	0	0	1.48723e-08
K14661	nodulation protein F [EC:2.3.1.-]	nodulation protein F [EC:2.3.1.-]	nodulation protein F	EC:2.3.1.-	None	None	0	0	0	0	0	0	0	0	0	0	0	0	0	0	0	0	0	0	0	0	0	0	0	0	0	0	0	0	0	0	0	0	8.86264e-09	0	0	0	0	0	0	0	0	0	1.48723e-08
K00785	beta-galactosamide-alpha-2,3-sialyltransferase [EC:2.4.99.-]	beta-galactosamide-alpha-2,3-sialyltransferase [EC:2.4.99.-]	beta-galactosamide-alpha-2,3-sialyltransferase	EC:2.4.99.-	Metabolism; Glycan Biosynthesis and Metabolism; Glycosyltransferases	Metabolism	Glycan Biosynthesis and Metabolism	Glycosyltransferases	0	0	0	0	0	0	0	0	0	0	0	0	0	0	0	0	0	1.28672e-08	0	0	0	0	0	0	0	0	0	0	0	0	0	0	0	0	0	0	0	0	0	0	0
K00035	D-galactose 1-dehydrogenase [EC:1.1.1.48]	D-galactose 1-dehydrogenase [EC:1.1.1.48]	D-galactose 1-dehydrogenase	EC:1.1.1.48	Metabolism; Carbohydrate Metabolism; Galactose metabolism	Metabolism	Carbohydrate Metabolism	Galactose metabolism	0	0	0	0	1.05707e-08	0	0	1.07726e-08	0	0	0	0	0	2.33996e-08	0	0	1.70077e-08	0	0	0	0	0	0	0	0	0	0	0	0	0	0	0	0	0	1.37165e-08	0	0	0	1.15533e-08	2.35782e-08	1.48723e-08
K00256	isoquinoline 1-oxidoreductase [EC:1.3.99.16]	isoquinoline 1-oxidoreductase [EC:1.3.99.16]	isoquinoline 1-oxidoreductase	EC:1.3.99.16	Unclassified; Metabolism; Energy metabolism	Unclassified	Metabolism	Energy metabolism	1.27503e-08	0	0	0	0	0	0	0	0	0	0	0	1.09115e-08	4.67992e-08	0	0	8.50386e-09	2.57344e-08	0	0	0	0	0	0	0	0	0	0	7.24216e-09	9.60589e-09	0	0	0	0	0	0	0	1.00284e-08	1.15533e-08	2.35782e-08	4.46168e-08
K02250	competence protein ComK	competence protein ComK	competence protein ComK	0	Environmental Information Processing; Membrane Transport; Secretion system	Environmental Information Processing	Membrane Transport	Secretion system	0	0	2.07403e-08	0	0	0	0	0	0	0	0	0	0	0	0	0	8.50386e-09	0	0	0	0	0	0	0	0	0	0	7.78177e-09	0	1.92118e-08	0	0	0	0	0	0	0	0	0	0	0
K03124	transcription initiation factor TFIIB	transcription initiation factor TFIIB	transcription initiation factor TFIIB	0	Genetic Information Processing; Transcription; Transcription machinery|Genetic Information Processing; Transcription; Basal transcription factors	Genetic Information Processing	Transcription	Transcription machinery	0	0	0	0	0	0	2.32067e-08	2.15452e-08	0	0	0	0	0	0	0	0	0	0	0	0	0	0	2.82933e-08	0	0	0	0	0	0	9.60589e-09	0	1.20023e-08	0	0	0	0	1.64863e-08	0	0	0	2.97445e-08
K11387	arabinosyltransferase C [EC:2.4.2.-]	arabinosyltransferase C [EC:2.4.2.-]	arabinosyltransferase C	EC:2.4.2.-	Metabolism; Glycan Biosynthesis and Metabolism; Glycosyltransferases	Metabolism	Glycan Biosynthesis and Metabolism	Glycosyltransferases	0	1.68604e-08	0	0	0	0	0	0	0	0	0	1.94043e-08	0	0	3.15525e-08	0	8.50386e-09	1.28672e-08	0	0	0	0	1.41466e-08	1.5159e-08	0	0	0	7.78177e-09	0	9.60589e-09	0	0	0	0	0	0	0	1.00284e-08	0	0	0
K11383	two-component system, NtrC family, sensor histidine kinase KinB [EC:2.7.13.3]	two-component system, NtrC family, sensor histidine kinase KinB [EC:2.7.13.3]	two-component system, NtrC family, sensor histidine kinase KinB	EC:2.7.13.3	Metabolism; Enzyme Families; Protein kinases|Environmental Information Processing; Signal Transduction; Two-component system	Metabolism	Enzyme Families	Protein kinases	0	0	0	0	0	0	0	0	0	0	0	0	0	0	0	0	0	0	0	0	0	0	0	0	0	0	0	0	0	0	0	0	0	0	0	0	0	0	0	0	1.48723e-08
K11949	4-(2-carboxyphenyl)-2-oxobut-3-enoate aldolase [EC:4.1.2.34]	4-(2-carboxyphenyl)-2-oxobut-3-enoate aldolase [EC:4.1.2.34]	4-(2-carboxyphenyl)-2-oxobut-3-enoate aldolase	EC:4.1.2.34	Metabolism; Xenobiotics Biodegradation and Metabolism; Polycyclic aromatic hydrocarbon degradation	Metabolism	Xenobiotics Biodegradation and Metabolism	Polycyclic aromatic hydrocarbon degradation	1.27503e-08	0	0	0	0	0	0	0	0	0	0	0	1.09115e-08	4.67992e-08	0	0	8.50386e-09	2.57344e-08	0	0	0	0	0	0	0	0	0	0	0	0	0	0	0	0	0	0	0	1.00284e-08	1.15533e-08	2.35782e-08	2.97445e-08
K07044	None	None	None	0	Unclassified; Poorly Characterized; General function prediction only	Unclassified	Poorly Characterized	General function prediction only	0	0	0	0	1.05707e-08	0	0	0	0	0	0	0	0	4.67992e-08	0	0	0	0	0	0	0	0	0	0	0	0	0	0	0	0	0	0	0	0	0	0	0	0	0	0	0
K05784	benzoate 1,2-dioxygenase electron transfer component	benzoate 1,2-dioxygenase electron transfer component	benzoate 1,2-dioxygenase electron transfer component	0	Metabolism; Xenobiotics Biodegradation and Metabolism; Fluorobenzoate degradation|Metabolism; Xenobiotics Biodegradation and Metabolism; Benzoate degradation	Metabolism	Xenobiotics Biodegradation and Metabolism	Fluorobenzoate degradation	0	0	0	0	0	0	0	0	0	0	0	0	0	0	0	0	0	0	0	0	0	1.78886e-08	0	0	0	9.69181e-09	0	0	0	0	0	0	0	0	0	0	1.64863e-08	0	0	0	1.48723e-08
K03339	6-phospho-5-dehydro-2-deoxy-D-gluconate aldolase [EC:4.1.2.29]	6-phospho-5-dehydro-2-deoxy-D-gluconate aldolase [EC:4.1.2.29]	6-phospho-5-dehydro-2-deoxy-D-gluconate aldolase	EC:4.1.2.29	Metabolism; Carbohydrate Metabolism; Inositol phosphate metabolism	Metabolism	Carbohydrate Metabolism	Inositol phosphate metabolism	0	0	0	0	0	0	0	0	0	0	0	0	0	0	0	0	0	0	1.11979e-08	0	1.18371e-08	0	0	1.5159e-08	0	9.69181e-09	0	7.78177e-09	7.24216e-09	1.92118e-08	0	1.80034e-08	1.67492e-08	0	0	0	0	1.00284e-08	0	1.17891e-08	0
K03333	cholesterol oxidase [EC:1.1.3.6]	cholesterol oxidase [EC:1.1.3.6]	cholesterol oxidase	EC:1.1.3.6	Metabolism; Lipid Metabolism; Steroid biosynthesis	Metabolism	Lipid Metabolism	Steroid biosynthesis	0	0	0	0	0	0	0	0	0	0	0	1.94043e-08	0	0	1.05175e-08	0	0	1.28672e-08	0	0	0	0	0	1.5159e-08	0	9.69181e-09	0	7.78177e-09	0	0	0	0	0	0	0	0	0	0	0	0	1.48723e-08
K10552	fructose transport system substrate-binding protein	fructose transport system substrate-binding protein	fructose transport system substrate-binding protein	0	Environmental Information Processing; Membrane Transport; ABC transporters|Environmental Information Processing; Membrane Transport; Transporters	Environmental Information Processing	Membrane Transport	ABC transporters	0	0	0	0	0	0	0	0	0	0	0	0	0	0	0	0	0	0	0	0	0	0	0	0	0	0	0	0	0	0	8.86264e-09	0	0	0	0	0	0	0	1.15533e-08	0	1.48723e-08
K10553	fructose transport system permease protein	fructose transport system permease protein	fructose transport system permease protein	0	Environmental Information Processing; Membrane Transport; ABC transporters|Environmental Information Processing; Membrane Transport; Transporters	Environmental Information Processing	Membrane Transport	ABC transporters	0	0	0	0	0	0	0	0	0	0	0	0	0	0	0	0	0	0	0	0	0	0	0	0	0	0	0	0	0	0	8.86264e-09	0	0	0	0	0	0	0	1.15533e-08	0	1.48723e-08
K10554	fructose transport system ATP-binding protein	fructose transport system ATP-binding protein	fructose transport system ATP-binding protein	0	Environmental Information Processing; Membrane Transport; ABC transporters|Environmental Information Processing; Membrane Transport; Transporters	Environmental Information Processing	Membrane Transport	ABC transporters	0	0	0	0	0	0	0	0	0	0	0	0	0	0	0	0	0	0	0	0	0	0	0	0	0	0	0	0	0	0	8.86264e-09	0	0	0	0	0	0	0	1.15533e-08	0	1.48723e-08
K07231	putative iron-regulated protein	putative iron-regulated protein	putative iron-regulated protein	0	Unclassified; Cellular Processes and Signaling; Inorganic ion transport and metabolism	Unclassified	Cellular Processes and Signaling	Inorganic ion transport and metabolism	1.27503e-08	0	0	0	0	0	0	0	0	0	0	0	1.09115e-08	4.67992e-08	0	0	1.70077e-08	2.57344e-08	0	0	0	1.78886e-08	0	0	1.49586e-08	9.69181e-09	0	7.78177e-09	0	9.60589e-09	1.77253e-08	0	0	0	0	0	1.64863e-08	1.00284e-08	1.15533e-08	2.35782e-08	5.9489e-08
K07230	None	None	None	0	Unclassified; Cellular Processes and Signaling; Inorganic ion transport and metabolism	Unclassified	Cellular Processes and Signaling	Inorganic ion transport and metabolism	0	0	0	0	0	0	0	0	0	0	0	0	1.09115e-08	0	0	0	8.50386e-09	1.28672e-08	0	0	0	1.78886e-08	1.41466e-08	0	1.49586e-08	0	0	1.55635e-08	7.24216e-09	2.88177e-08	0	6.00113e-09	0	0	1.37165e-08	0	0	0	0	0	1.48723e-08
K00011	aldehyde reductase [EC:1.1.1.21]	aldehyde reductase [EC:1.1.1.21]	aldehyde reductase	EC:1.1.1.21	Metabolism; Carbohydrate Metabolism; Fructose and mannose metabolism|Metabolism; Carbohydrate Metabolism; Pyruvate metabolism|Metabolism; Carbohydrate Metabolism; Pentose and glucuronate interconversions|Metabolism; Lipid Metabolism; Glycerolipid metabolism|Metabolism; Carbohydrate Metabolism; Galactose metabolism	Metabolism	Carbohydrate Metabolism	Fructose and mannose metabolism	1.27503e-08	0	0	2.34669e-08	0	1.08042e-08	1.16033e-08	1.07726e-08	1.58588e-08	5.5264e-08	0	0	1.09115e-08	0	0	0	0	1.28672e-08	0	3.44826e-08	0	0	0	0	0	9.69181e-09	1.91129e-08	0	7.24216e-09	0	1.77253e-08	0	0	0	0	0	0	1.00284e-08	1.0398e-07	8.25237e-08	0
K08253	non-specific protein-tyrosine kinase [EC:2.7.10.2]	non-specific protein-tyrosine kinase [EC:2.7.10.2]	non-specific protein-tyrosine kinase	EC:2.7.10.2	Unclassified; Cellular Processes and Signaling; Signal transduction mechanisms	Unclassified	Cellular Processes and Signaling	Signal transduction mechanisms	0	0	0	0	0	0	0	0	0	0	0	0	0	0	0	0	0	0	0	0	0	0	0	0	0	0	0	0	0	0	0	0	0	0	0	0	0	0	0	0	0
K08255	CoA-disulfide reductase [EC:1.8.1.14]	CoA-disulfide reductase [EC:1.8.1.14]	CoA-disulfide reductase	EC:1.8.1.14	Unclassified; Metabolism; Others	Unclassified	Metabolism	Others	0	0	2.07403e-08	0	0	0	0	0	0	0	0	0	0	0	0	0	8.50386e-09	0	0	0	0	0	0	0	0	0	0	0	0	1.92118e-08	0	0	0	0	0	0	0	0	0	0	0
K01274	D-alanyl-D-alanine dipeptidase [EC:3.4.13.-]	D-alanyl-D-alanine dipeptidase [EC:3.4.13.-]	D-alanyl-D-alanine dipeptidase	EC:3.4.13.-	Unclassified; Cellular Processes and Signaling; Membrane and intracellular structural molecules	Unclassified	Cellular Processes and Signaling	Membrane and intracellular structural molecules	0	0	0	0	0	0	0	0	0	0	0	0	0	0	0	0	8.50386e-09	0	0	0	0	0	1.41466e-08	1.5159e-08	1.49586e-08	0	0	0	0	9.60589e-09	0	0	0	0	0	0	0	0	0	0	1.48723e-08
K12541	ATP-binding cassette, subfamily C, bacterial LapB	ATP-binding cassette, subfamily C, bacterial LapB	ATP-binding cassette, subfamily C, bacterial LapB	0	Environmental Information Processing; Membrane Transport; Secretion system	Environmental Information Processing	Membrane Transport	Secretion system	0	0	0	0	0	0	0	0	0	0	0	0	0	0	0	0	0	0	0	0	0	0	0	0	0	0	0	0	0	0	0	0	0	0	0	0	0	0	0	0	1.48723e-08
K12543	outer membrane protein LapE	outer membrane protein LapE	outer membrane protein LapE	0	Environmental Information Processing; Membrane Transport; Secretion system	Environmental Information Processing	Membrane Transport	Secretion system	0	0	0	0	0	0	0	0	0	0	0	0	0	0	0	0	0	0	0	0	0	0	0	0	0	0	0	0	0	0	0	0	0	0	0	0	0	0	0	0	1.48723e-08
K12542	membrane fusion protein LapC	membrane fusion protein LapC	membrane fusion protein LapC	0	Environmental Information Processing; Membrane Transport; Secretion system	Environmental Information Processing	Membrane Transport	Secretion system	0	0	0	0	0	0	0	0	0	0	0	0	0	0	0	0	0	0	0	0	0	0	0	0	0	0	0	0	0	0	0	0	0	0	0	0	0	0	0	0	1.48723e-08
K12549	surface adhesion protein	surface adhesion protein	surface adhesion protein	0	Unclassified; Cellular Processes and Signaling; Cell motility and secretion	Unclassified	Cellular Processes and Signaling	Cell motility and secretion	0	0	0	0	0	0	0	0	0	0	0	0	0	0	0	0	0	0	0	0	0	0	0	0	0	0	0	0	0	0	0	0	0	0	0	0	0	0	0	0	1.48723e-08
K11016	hemolysin	hemolysin	hemolysin	0	Environmental Information Processing; Membrane Transport; Secretion system|Environmental Information Processing; Signaling Molecules and Interaction; Bacterial toxins|Environmental Information Processing; Membrane Transport; Bacterial secretion system	Environmental Information Processing	Membrane Transport	Secretion system	0	0	0	0	0	0	0	0	0	0	0	0	0	0	0	0	0	0	0	0	0	1.78886e-08	0	0	0	0	0	1.55635e-08	0	1.92118e-08	0	0	0	0	0	0	0	0	0	0	1.48723e-08
K11017	hemolysin activation/secretion protein??	hemolysin activation/secretion protein??	hemolysin activation/secretion protein??	0	Environmental Information Processing; Membrane Transport; Secretion system|Environmental Information Processing; Signaling Molecules and Interaction; Bacterial toxins|Environmental Information Processing; Membrane Transport; Bacterial secretion system	Environmental Information Processing	Membrane Transport	Secretion system	0	0	0	0	0	0	0	0	0	0	0	0	0	0	0	0	0	0	0	0	0	1.78886e-08	0	0	0	0	0	1.55635e-08	0	1.92118e-08	0	0	0	0	0	0	0	0	0	0	1.48723e-08
K11014	cytolethal distending toxin subunit B	cytolethal distending toxin subunit B	cytolethal distending toxin subunit B	0	Environmental Information Processing; Signaling Molecules and Interaction; Bacterial toxins	Environmental Information Processing	Signaling Molecules and Interaction	Bacterial toxins	0	0	0	0	0	0	0	0	0	0	0	0	0	0	1.2621e-07	0	1.70077e-08	0	6.71874e-08	5.7471e-08	0	1.07331e-07	0	4.54771e-07	4.78677e-07	5.23358e-07	1.45258e-06	3.26834e-07	0	0	0	0	0	0	1.37165e-08	0	0	0	0	0	0
K11015	cytolethal distending toxin subunit C	cytolethal distending toxin subunit C	cytolethal distending toxin subunit C	0	Environmental Information Processing; Signaling Molecules and Interaction; Bacterial toxins	Environmental Information Processing	Signaling Molecules and Interaction	Bacterial toxins	0	0	0	0	0	0	0	0	0	0	0	0	0	0	1.2621e-07	0	1.70077e-08	0	6.71874e-08	5.7471e-08	0	1.07331e-07	0	4.54771e-07	4.78677e-07	5.23358e-07	1.45258e-06	3.26834e-07	0	0	0	0	0	0	0	0	0	0	0	0	0
K11013	cytolethal distending toxin subunit A	cytolethal distending toxin subunit A	cytolethal distending toxin subunit A	0	Environmental Information Processing; Signaling Molecules and Interaction; Bacterial toxins	Environmental Information Processing	Signaling Molecules and Interaction	Bacterial toxins	0	0	0	0	0	0	0	0	0	0	0	0	0	0	1.2621e-07	0	1.70077e-08	0	6.71874e-08	5.7471e-08	0	1.07331e-07	0	4.54771e-07	4.78677e-07	5.23358e-07	1.45258e-06	3.26834e-07	0	0	0	0	0	0	0	0	0	0	0	0	0
K06882	None	None	None	0	Unclassified; Poorly Characterized; General function prediction only	Unclassified	Poorly Characterized	General function prediction only	0	0	0	0	0	0	0	0	0	0	0	0	0	0	1.2621e-07	0	1.70077e-08	0	6.71874e-08	5.7471e-08	0	1.07331e-07	0	4.54771e-07	4.78677e-07	5.23358e-07	1.45258e-06	3.26834e-07	0	0	0	0	0	0	0	0	0	0	0	0	0
K06887	None	None	None	0	Unclassified; Poorly Characterized; General function prediction only	Unclassified	Poorly Characterized	General function prediction only	0	0	0	0	0	0	0	0	0	0	0	0	0	0	0	0	0	0	0	0	1.18371e-08	1.78886e-08	1.41466e-08	0	0	0	0	5.44724e-08	7.24216e-09	7.68471e-08	0	0	0	0	0	0	0	0	0	0	0
K00485	dimethylaniline monooxygenase (N-oxide forming) [EC:1.14.13.8]	dimethylaniline monooxygenase (N-oxide forming) [EC:1.14.13.8]	dimethylaniline monooxygenase (N-oxide forming)	EC:1.14.13.8	Metabolism; Xenobiotics Biodegradation and Metabolism; Drug metabolism - cytochrome P450|Metabolism; Energy Metabolism; Methane metabolism	Metabolism	Xenobiotics Biodegradation and Metabolism	Drug metabolism - cytochrome P450	0	0	0	0	0	0	0	0	0	0	0	0	0	0	0	0	0	0	0	0	0	0	0	0	0	0	0	0	0	0	1.77253e-08	0	0	0	0	0	0	0	1.15533e-08	1.17891e-08	2.97445e-08
K07681	two-component system, NarL family, vancomycin resistance sensor histidine kinase VraS [EC:2.7.13.3]	two-component system, NarL family, vancomycin resistance sensor histidine kinase VraS [EC:2.7.13.3]	two-component system, NarL family, vancomycin resistance sensor histidine kinase VraS	EC:2.7.13.3	Metabolism; Enzyme Families; Protein kinases|Environmental Information Processing; Signal Transduction; Two-component system	Metabolism	Enzyme Families	Protein kinases	0	0	2.07403e-08	0	0	0	0	0	0	0	0	0	0	0	0	0	8.50386e-09	0	0	0	0	0	0	0	0	0	0	0	0	1.92118e-08	0	0	0	0	0	0	0	0	0	0	0
K04016	formate-dependent nitrite reductase, possible assembly protein; cytochrome c-type protein NrfE	formate-dependent nitrite reductase, possible assembly protein; cytochrome c-type protein NrfE	formate-dependent nitrite reductase, possible assembly protein; cytochrome c-type protein NrfE	0	Metabolism; Energy Metabolism; Nitrogen metabolism	Metabolism	Energy Metabolism	Nitrogen metabolism	0	0	0	0	0	0	0	0	0	0	0	0	1.09115e-08	0	0	0	0	1.28672e-08	0	0	0	0	0	0	0	0	0	0	0	0	0	0	0	0	0	0	0	0	0	0	1.48723e-08
K07064	None	None	None	0	Unclassified; Poorly Characterized; General function prediction only	Unclassified	Poorly Characterized	General function prediction only	0	0	0	0	0	0	2.32067e-08	2.15452e-08	0	0	0	0	0	0	0	0	0	0	0	0	0	0	2.82933e-08	0	0	0	0	0	0	9.60589e-09	0	1.20023e-08	0	0	0	0	1.64863e-08	0	0	0	2.97445e-08
K01121	2,3-cyclic-nucleotide 3-phosphodiesterase [EC:3.1.4.37]	2',3'-cyclic-nucleotide 3'-phosphodiesterase [EC:3.1.4.37]	2',3'-cyclic-nucleotide 3'-phosphodiesterase	EC:3.1.4.37	Unclassified; Metabolism; Nucleotide metabolism	Unclassified	Metabolism	Nucleotide metabolism	0	0	0	0	0	0	0	0	0	0	0	0	0	0	1.2621e-07	0	1.70077e-08	0	6.71874e-08	5.7471e-08	0	1.07331e-07	0	4.54771e-07	4.78677e-07	5.23358e-07	1.45258e-06	3.26834e-07	0	0	0	0	0	0	0	0	0	0	0	0	0
K13623	S-adenosylmethionine-diacylgycerolhomoserine-N-methlytransferase	S-adenosylmethionine-diacylgycerolhomoserine-N-methlytransferase	S-adenosylmethionine-diacylgycerolhomoserine-N-methlytransferase	0	Metabolism; Lipid Metabolism; Glycerophospholipid metabolism	Metabolism	Lipid Metabolism	Glycerophospholipid metabolism	0	0	0	0	0	0	0	0	0	0	0	0	0	0	0	0	0	0	0	0	0	0	0	0	0	0	0	0	0	0	8.86264e-09	0	0	0	0	0	0	0	0	0	1.48723e-08
K12976	lipid A 3-O-deacylase [EC:3.1.-.-]	lipid A 3-O-deacylase [EC:3.1.-.-]	lipid A 3-O-deacylase	EC:3.1.-.-	Metabolism; Glycan Biosynthesis and Metabolism; Lipopolysaccharide biosynthesis proteins	Metabolism	Glycan Biosynthesis and Metabolism	Lipopolysaccharide biosynthesis proteins	0	0	0	0	0	0	0	0	0	0	0	0	0	0	0	0	8.50386e-09	0	0	0	0	1.78886e-08	0	0	1.49586e-08	9.69181e-09	0	0	0	9.60589e-09	0	0	0	0	0	0	0	0	0	0	1.48723e-08
K14750	ethylbenzene dioxygenase ferredoxin component	ethylbenzene dioxygenase ferredoxin component	ethylbenzene dioxygenase ferredoxin component	0	None	None	0	0	1.27503e-08	0	0	0	0	0	0	0	0	0	0	0	1.09115e-08	4.67992e-08	0	0	8.50386e-09	2.57344e-08	0	0	0	0	0	0	0	0	0	0	0	0	0	0	0	0	0	0	0	1.00284e-08	1.15533e-08	2.35782e-08	2.97445e-08
K14751	2,3-dihydroxyethylbenzene 1,2-dioxygenase [EC:1.13.11.-]	2,3-dihydroxyethylbenzene 1,2-dioxygenase [EC:1.13.11.-]	2,3-dihydroxyethylbenzene 1,2-dioxygenase	EC:1.13.11.-	None	None	0	0	1.27503e-08	0	0	0	0	0	0	0	0	0	0	0	1.09115e-08	4.67992e-08	0	0	8.50386e-09	2.57344e-08	0	0	0	0	0	0	0	0	0	0	0	0	0	0	0	0	0	0	0	1.00284e-08	1.15533e-08	2.35782e-08	2.97445e-08
K00154	coniferyl-aldehyde dehydrogenase [EC:1.2.1.68]	coniferyl-aldehyde dehydrogenase [EC:1.2.1.68]	coniferyl-aldehyde dehydrogenase	EC:1.2.1.68	Unclassified; Metabolism; Energy metabolism	Unclassified	Metabolism	Energy metabolism	1.27503e-08	0	0	0	2.11414e-08	0	0	0	0	0	0	0	1.09115e-08	7.01987e-08	0	0	1.70077e-08	2.57344e-08	0	0	0	1.78886e-08	1.41466e-08	0	0	0	0	0	7.24216e-09	0	1.77253e-08	6.00113e-09	0	0	1.37165e-08	0	0	1.00284e-08	2.31067e-08	4.71564e-08	5.9489e-08
K10533	limonene-1,2-epoxide hydrolase [EC:3.3.2.8]	limonene-1,2-epoxide hydrolase [EC:3.3.2.8]	limonene-1,2-epoxide hydrolase	EC:3.3.2.8	Metabolism; Metabolism of Terpenoids and Polyketides; Limonene and pinene degradation	Metabolism	Metabolism of Terpenoids and Polyketides	Limonene and pinene degradation	0	0	0	0	0	0	0	1.07726e-08	0	0	0	0	0	0	0	0	0	0	0	0	0	0	0	0	0	0	0	0	0	0	0	0	0	0	1.37165e-08	0	0	0	0	0	0
K00293	saccharopine dehydrogenase (NADP+, L-glutamate forming) [EC:1.5.1.10]	saccharopine dehydrogenase (NADP+, L-glutamate forming) [EC:1.5.1.10]	saccharopine dehydrogenase (NADP+, L-glutamate forming)	EC:1.5.1.10	Metabolism; Amino Acid Metabolism; Lysine degradation|Metabolism; Amino Acid Metabolism; Lysine biosynthesis	Metabolism	Amino Acid Metabolism	Lysine degradation	2.55007e-08	5.05811e-08	2.07403e-08	1.17334e-08	0	0	5.80167e-08	9.69533e-08	4.75763e-08	3.68427e-08	0	0	0	0	1.05175e-08	0	0	1.28672e-08	0	1.14942e-08	0	1.78886e-08	2.82933e-08	3.03181e-08	0	9.69181e-09	1.91129e-08	7.78177e-09	0	0	1.77253e-08	0	0	2.84464e-08	0	0	0	0	2.31067e-08	1.17891e-08	0
K03921	acyl-[acyl-carrier-protein] desaturase [EC:1.14.19.2]	acyl-[acyl-carrier-protein] desaturase [EC:1.14.19.2]	acyl-[acyl-carrier-protein] desaturase	EC:1.14.19.2	Metabolism; Lipid Metabolism; Fatty acid biosynthesis|Metabolism; Lipid Metabolism; Lipid biosynthesis proteins|Metabolism; Lipid Metabolism; Biosynthesis of unsaturated fatty acids	Metabolism	Lipid Metabolism	Fatty acid biosynthesis	0	0	0	0	0	0	0	0	0	0	0	0	0	2.33996e-08	0	0	0	0	0	0	0	0	0	0	0	0	0	0	0	0	0	0	0	0	0	0	0	1.00284e-08	0	1.17891e-08	1.48723e-08
K05523	molecular chaperone HchA (Hsp31)	molecular chaperone HchA (Hsp31)	molecular chaperone HchA (Hsp31)	0	Unclassified; Genetic Information Processing; Protein folding and associated processing	Unclassified	Genetic Information Processing	Protein folding and associated processing	0	0	0	0	0	0	0	0	0	0	0	0	0	0	0	0	0	1.28672e-08	0	0	0	0	0	0	0	0	0	0	0	0	0	0	0	0	0	0	0	0	0	0	1.48723e-08
K03379	cyclohexanone monooxygenase [EC:1.14.13.22]	cyclohexanone monooxygenase [EC:1.14.13.22]	cyclohexanone monooxygenase	EC:1.14.13.22	Metabolism; Xenobiotics Biodegradation and Metabolism; Caprolactam degradation	Metabolism	Xenobiotics Biodegradation and Metabolism	Caprolactam degradation	0	0	0	0	0	0	0	1.07726e-08	0	0	0	0	0	0	0	0	0	0	0	0	0	0	0	0	0	0	0	0	0	9.60589e-09	0	0	0	0	1.37165e-08	0	0	0	0	0	0
K11930	periplasmic protein TorT	periplasmic protein TorT	periplasmic protein TorT	0	Unclassified; Metabolism; Carbohydrate metabolism	Unclassified	Metabolism	Carbohydrate metabolism	0	0	0	0	0	0	0	0	0	0	0	0	0	0	0	0	0	0	0	0	0	0	0	0	0	0	0	0	0	0	8.86264e-09	0	0	0	0	0	0	0	0	0	1.48723e-08
K11935	biofilm PGA synthesis protein PgaA	biofilm PGA synthesis protein PgaA	biofilm PGA synthesis protein PgaA	0	Unclassified; Cellular Processes and Signaling; Membrane and intracellular structural molecules	Unclassified	Cellular Processes and Signaling	Membrane and intracellular structural molecules	0	0	0	0	0	0	0	0	0	0	0	0	0	0	0	0	0	0	0	0	0	0	0	0	0	0	0	0	0	0	0	0	0	0	0	0	0	0	0	0	0
K11937	biofilm PGA synthesis protein PgaD	biofilm PGA synthesis protein PgaD	biofilm PGA synthesis protein PgaD	0	Unclassified; Cellular Processes and Signaling; Membrane and intracellular structural molecules	Unclassified	Cellular Processes and Signaling	Membrane and intracellular structural molecules	0	0	0	0	0	0	0	0	0	0	0	0	0	0	0	0	0	0	0	0	0	1.78886e-08	0	0	0	0	0	0	0	0	0	0	0	0	0	0	0	0	0	0	1.48723e-08
K11936	biofilm PGA synthesis N-glycosyltransferase PgaC [EC:2.4.-.-]	biofilm PGA synthesis N-glycosyltransferase PgaC [EC:2.4.-.-]	biofilm PGA synthesis N-glycosyltransferase PgaC	EC:2.4.-.-	Unclassified; Cellular Processes and Signaling; Membrane and intracellular structural molecules	Unclassified	Cellular Processes and Signaling	Membrane and intracellular structural molecules	0	0	0	0	0	0	0	0	0	0	0	0	0	0	0	0	0	0	0	0	0	1.78886e-08	0	0	0	0	0	0	0	9.60589e-09	0	0	0	0	0	0	0	0	0	0	1.48723e-08
K02480	two-component system, NarL family, sensor kinase [EC:2.7.13.3]	two-component system, NarL family, sensor kinase [EC:2.7.13.3]	two-component system, NarL family, sensor kinase	EC:2.7.13.3	Metabolism; Enzyme Families; Protein kinases|Environmental Information Processing; Signal Transduction; Two-component system	Metabolism	Enzyme Families	Protein kinases	1.27503e-08	0	0	0	0	0	0	0	0	0	0	0	1.09115e-08	4.67992e-08	0	0	8.50386e-09	2.57344e-08	0	0	0	1.78886e-08	1.41466e-08	0	0	0	0	0	0	0	0	6.00113e-09	0	0	0	0	0	1.00284e-08	1.15533e-08	2.35782e-08	2.97445e-08
K02487	type IV pili sensor histidine kinase and response regulator	type IV pili sensor histidine kinase and response regulator	type IV pili sensor histidine kinase and response regulator	0	Cellular Processes; Cell Motility; Bacterial motility proteins|Environmental Information Processing; Signal Transduction; Two-component system	Cellular Processes	Cell Motility	Bacterial motility proteins	0	0	0	0	0	2.16084e-08	0	0	0	0	0	0	0	0	1.05175e-08	0	1.70077e-08	1.28672e-08	0	0	1.18371e-08	1.78886e-08	1.41466e-08	0	1.49586e-08	9.69181e-09	0	3.11271e-08	7.24216e-09	4.80295e-08	0	6.00113e-09	0	0	0	0	1.64863e-08	0	0	0	1.48723e-08
K08605	coccolysin [EC:3.4.24.30]	coccolysin [EC:3.4.24.30]	coccolysin	EC:3.4.24.30	Metabolism; Enzyme Families; Peptidases	Metabolism	Enzyme Families	Peptidases	0	0	0	0	0	0	0	0	0	0	0	0	0	0	4.207e-08	0	0	1.28672e-08	1.11979e-08	1.14942e-08	0	0	0	0	1.49586e-08	0	0	0	7.24216e-09	9.60589e-09	0	0	0	0	0	0	1.64863e-08	0	0	0	0
K09950	hypothetical protein	hypothetical protein	hypothetical protein	0	Unclassified; Poorly Characterized; Function unknown	Unclassified	Poorly Characterized	Function unknown	0	0	0	0	1.05707e-08	0	0	1.07726e-08	1.58588e-08	0	0	0	0	2.33996e-08	0	0	8.50386e-09	1.28672e-08	0	0	0	1.78886e-08	0	0	0	9.69181e-09	0	7.78177e-09	7.24216e-09	0	0	0	0	0	1.37165e-08	0	1.64863e-08	0	1.15533e-08	1.17891e-08	2.97445e-08
K14189	uncharacterized oxidoreductase [EC:1.-.-.-]	uncharacterized oxidoreductase [EC:1.-.-.-]	uncharacterized oxidoreductase	EC:1.-.-.-	Unclassified; Cellular Processes and Signaling; Membrane and intracellular structural molecules	Unclassified	Cellular Processes and Signaling	Membrane and intracellular structural molecules	0	0	0	0	0	0	0	0	0	0	0	0	0	2.33996e-08	1.05175e-08	0	0	0	0	0	0	0	0	0	0	0	0	0	0	9.60589e-09	0	0	0	0	1.37165e-08	0	0	1.00284e-08	1.15533e-08	1.17891e-08	1.48723e-08
K02763	PTS system, D-glucosamine-specific IIA component [EC:2.7.1.69]	PTS system, D-glucosamine-specific IIA component [EC:2.7.1.69]	PTS system, D-glucosamine-specific IIA component	EC:2.7.1.69	Metabolism; Carbohydrate Metabolism; Amino sugar and nucleotide sugar metabolism|Environmental Information Processing; Membrane Transport; Phosphotransferase system (PTS)|Environmental Information Processing; Membrane Transport; Transporters	Metabolism	Carbohydrate Metabolism	Amino sugar and nucleotide sugar metabolism	7.6502e-08	0	0	0	3.17121e-08	0	0	0	1.58588e-08	0	0	0	0	0	0	0	0	0	0	0	0	0	0	0	0	0	0	0	0	9.60589e-09	0	0	0	0	0	0	0	0	0	0	1.48723e-08
K00947	None	None	None	0	Unclassified; Metabolism; Others	Unclassified	Metabolism	Others	0	0	0	0	0	0	0	0	0	0	0	0	0	0	0	0	0	0	0	1.14942e-08	0	0	0	0	0	0	0	0	7.24216e-09	0	0	0	0	0	0	0	0	0	0	0	1.48723e-08
K07647	two-component system, OmpR family, sensor histidine kinase TorS [EC:2.7.13.3]	two-component system, OmpR family, sensor histidine kinase TorS [EC:2.7.13.3]	two-component system, OmpR family, sensor histidine kinase TorS	EC:2.7.13.3	Metabolism; Enzyme Families; Protein kinases|Environmental Information Processing; Signal Transduction; Two-component system	Metabolism	Enzyme Families	Protein kinases	0	0	0	0	0	0	0	0	0	0	0	0	0	0	0	0	0	0	0	0	0	0	0	0	0	0	0	0	0	0	8.86264e-09	0	0	0	0	0	0	0	0	0	1.48723e-08
K07020	None	None	None	0	Unclassified; Poorly Characterized; General function prediction only	Unclassified	Poorly Characterized	General function prediction only	0	0	0	0	0	0	0	0	0	0	0	0	0	0	0	0	0	0	0	0	0	0	0	0	0	0	0	0	0	0	8.86264e-09	0	0	0	0	0	0	0	0	1.17891e-08	2.97445e-08
K01170	tRNA-intron endonuclease, archaea type [EC:3.1.27.9]; tRNA-intron endonuclease [EC:3.1.27.9]	tRNA-intron endonuclease, archaea type [EC:3.1.27.9]; tRNA-intron endonuclease [EC:3.1.27.9]	tRNA-intron endonuclease, archaea type	EC:3.1.27.9	Unclassified; Genetic Information Processing; Translation proteins	Unclassified	Genetic Information Processing	Translation proteins	0	0	0	0	0	0	2.32067e-08	2.15452e-08	0	0	0	0	0	0	0	0	0	0	0	0	0	0	2.82933e-08	0	0	0	0	0	0	9.60589e-09	0	1.20023e-08	0	0	0	0	1.64863e-08	0	0	0	2.97445e-08
K14578	naphthalene 1,2-dioxygenase system ferredoxin subunit	naphthalene 1,2-dioxygenase system ferredoxin subunit	naphthalene 1,2-dioxygenase system ferredoxin subunit	0	Metabolism; Xenobiotics Biodegradation and Metabolism; Ethylbenzene degradation|Metabolism; Xenobiotics Biodegradation and Metabolism; Polycyclic aromatic hydrocarbon degradation|Metabolism; Xenobiotics Biodegradation and Metabolism; Naphthalene degradation	Metabolism	Xenobiotics Biodegradation and Metabolism	Ethylbenzene degradation	0	0	0	0	0	0	0	0	0	0	0	0	0	0	0	0	8.50386e-09	0	0	0	0	0	0	0	1.49586e-08	0	0	7.78177e-09	0	9.60589e-09	0	0	0	0	0	0	0	0	0	0	0
K14579	naphthalene 1,2-dioxygenase subunit alpha [EC:1.14.12.12]	naphthalene 1,2-dioxygenase subunit alpha [EC:1.14.12.12]	naphthalene 1,2-dioxygenase subunit alpha	EC:1.14.12.12	Metabolism; Xenobiotics Biodegradation and Metabolism; Ethylbenzene degradation|Metabolism; Xenobiotics Biodegradation and Metabolism; Polycyclic aromatic hydrocarbon degradation|Metabolism; Xenobiotics Biodegradation and Metabolism; Naphthalene degradation	Metabolism	Xenobiotics Biodegradation and Metabolism	Ethylbenzene degradation	1.27503e-08	0	0	0	0	0	0	0	0	0	0	0	1.09115e-08	4.67992e-08	0	0	8.50386e-09	2.57344e-08	0	0	0	0	0	0	0	0	0	0	0	0	0	0	0	0	0	0	0	1.00284e-08	1.15533e-08	2.35782e-08	2.97445e-08
K11919	type VI secretion system lysozyme-related protein	type VI secretion system lysozyme-related protein	type VI secretion system lysozyme-related protein	0	Environmental Information Processing; Membrane Transport; Secretion system	Environmental Information Processing	Membrane Transport	Secretion system	0	0	0	0	0	0	0	0	0	0	0	0	0	0	0	0	0	0	0	0	0	0	0	0	0	0	0	0	0	0	0	0	0	0	0	0	0	0	0	0	1.48723e-08
K11918	type VI secretion system protein	type VI secretion system protein	type VI secretion system protein	0	Environmental Information Processing; Membrane Transport; Secretion system	Environmental Information Processing	Membrane Transport	Secretion system	0	0	0	0	0	0	0	0	0	0	0	0	0	0	0	0	0	0	0	0	0	0	0	0	0	0	0	0	0	0	0	0	0	0	0	0	0	0	0	0	1.48723e-08
K12062	conjugal transfer pilin signal peptidase TrbI	conjugal transfer pilin signal peptidase TrbI	conjugal transfer pilin signal peptidase TrbI	0	Environmental Information Processing; Membrane Transport; Secretion system	Environmental Information Processing	Membrane Transport	Secretion system	1.27503e-08	0	0	0	0	1.08042e-08	0	0	0	0	0	0	1.09115e-08	4.67992e-08	0	0	1.70077e-08	2.57344e-08	0	0	0	0	0	0	0	0	0	0	0	0	0	0	0	0	0	0	0	1.00284e-08	1.15533e-08	2.35782e-08	2.97445e-08
K12064	conjugal transfer pilus assembly protein TraV	conjugal transfer pilus assembly protein TraV	conjugal transfer pilus assembly protein TraV	0	Environmental Information Processing; Membrane Transport; Secretion system	Environmental Information Processing	Membrane Transport	Secretion system	1.27503e-08	0	0	0	0	1.08042e-08	0	0	0	0	0	0	1.09115e-08	4.67992e-08	0	0	1.70077e-08	2.57344e-08	0	0	0	0	0	0	0	0	0	0	0	0	0	0	0	0	0	0	0	1.00284e-08	1.15533e-08	2.35782e-08	2.97445e-08
K12065	conjugal transfer pilus assembly protein TraB	conjugal transfer pilus assembly protein TraB	conjugal transfer pilus assembly protein TraB	0	Environmental Information Processing; Membrane Transport; Secretion system	Environmental Information Processing	Membrane Transport	Secretion system	1.27503e-08	0	0	0	0	1.08042e-08	0	0	0	0	0	0	1.09115e-08	4.67992e-08	0	0	1.70077e-08	2.57344e-08	0	0	0	0	0	0	0	0	0	0	0	0	0	0	0	0	0	0	0	1.00284e-08	1.15533e-08	2.35782e-08	2.97445e-08
K07256	taurine dehydrogenase large subunit [EC:1.4.2.-]	taurine dehydrogenase large subunit [EC:1.4.2.-]	taurine dehydrogenase large subunit	EC:1.4.2.-	Metabolism; Metabolism of Other Amino Acids; Taurine and hypotaurine metabolism|Metabolism; Energy Metabolism; Nitrogen metabolism	Metabolism	Metabolism of Other Amino Acids	Taurine and hypotaurine metabolism	1.27503e-08	0	0	0	0	0	0	0	0	0	0	0	1.09115e-08	4.67992e-08	0	0	8.50386e-09	2.57344e-08	0	0	0	0	0	0	0	0	0	0	0	0	8.86264e-09	0	0	0	0	0	0	1.00284e-08	1.15533e-08	2.35782e-08	4.46168e-08
K01617	4-oxalocrotonate decarboxylase [EC:4.1.1.77]	4-oxalocrotonate decarboxylase [EC:4.1.1.77]	4-oxalocrotonate decarboxylase	EC:4.1.1.77	Metabolism; Xenobiotics Biodegradation and Metabolism; Xylene degradation|Metabolism; Xenobiotics Biodegradation and Metabolism; Dioxin degradation|Metabolism; Xenobiotics Biodegradation and Metabolism; Benzoate degradation	Metabolism	Xenobiotics Biodegradation and Metabolism	Xylene degradation	1.27503e-08	0	0	0	0	1.08042e-08	0	0	0	0	0	0	1.09115e-08	4.67992e-08	0	0	1.70077e-08	2.57344e-08	0	0	0	0	0	0	0	0	0	7.78177e-09	0	0	8.86264e-09	0	0	0	0	0	0	1.00284e-08	1.15533e-08	2.35782e-08	5.9489e-08
K05281	2-hydroxyisoflavone reductase [EC:1.3.1.45]	2'-hydroxyisoflavone reductase [EC:1.3.1.45]	2'-hydroxyisoflavone reductase	EC:1.3.1.45	Metabolism; Biosynthesis of Other Secondary Metabolites; Isoflavonoid biosynthesis	Metabolism	Biosynthesis of Other Secondary Metabolites	Isoflavonoid biosynthesis	0	0	0	0	1.05707e-08	0	0	0	0	0	0	0	0	2.33996e-08	0	0	8.50386e-09	0	0	0	0	0	0	0	0	0	0	0	0	0	0	0	0	0	1.37165e-08	0	0	0	1.15533e-08	1.17891e-08	0
K09709	hypothetical protein; mesaconyl-C4 CoA hydratase	hypothetical protein; mesaconyl-C4 CoA hydratase	hypothetical protein; mesaconyl-C4 CoA hydratase	0	Metabolism; Energy Metabolism; Carbon fixation pathways in prokaryotes	Metabolism	Energy Metabolism	Carbon fixation pathways in prokaryotes	1.27503e-08	0	0	0	0	0	0	0	0	0	0	0	1.09115e-08	4.67992e-08	0	0	1.70077e-08	2.57344e-08	0	0	0	1.78886e-08	1.41466e-08	0	1.49586e-08	0	0	7.78177e-09	0	9.60589e-09	0	6.00113e-09	0	0	0	0	0	1.00284e-08	1.15533e-08	2.35782e-08	2.97445e-08
K05915	None	None	None	0	Metabolism; Xenobiotics Biodegradation and Metabolism; Bisphenol degradation|Metabolism; Xenobiotics Biodegradation and Metabolism; Naphthalene degradation	Metabolism	Xenobiotics Biodegradation and Metabolism	Bisphenol degradation	0	0	0	0	0	0	0	0	0	0	0	0	0	0	0	0	0	0	0	0	0	0	0	0	0	0	0	0	0	0	8.86264e-09	0	0	0	0	0	0	0	0	0	1.48723e-08
K09146	hypothetical protein	hypothetical protein	hypothetical protein	0	Unclassified; Poorly Characterized; Function unknown	Unclassified	Poorly Characterized	Function unknown	0	1.68604e-08	0	0	0	0	0	0	0	0	0	1.94043e-08	0	0	3.15525e-08	0	8.50386e-09	1.28672e-08	0	0	0	0	1.41466e-08	1.5159e-08	0	0	0	7.78177e-09	0	9.60589e-09	0	0	0	0	0	0	0	1.00284e-08	0	0	0
K05709	small terminal subunit of phenylpropionate dioxygenase [EC:1.14.12.19]	small terminal subunit of phenylpropionate dioxygenase [EC:1.14.12.19]	small terminal subunit of phenylpropionate dioxygenase	EC:1.14.12.19	Metabolism; Amino Acid Metabolism; Phenylalanine metabolism	Metabolism	Amino Acid Metabolism	Phenylalanine metabolism	0	0	0	0	0	0	0	0	0	0	0	0	0	0	0	0	8.50386e-09	0	0	1.14942e-08	0	1.78886e-08	0	1.5159e-08	1.49586e-08	9.69181e-09	0	7.78177e-09	0	9.60589e-09	0	0	0	0	1.37165e-08	0	0	0	0	0	0
K05708	large terminal subunit of phenylpropionate dioxygenase [EC:1.14.12.19]	large terminal subunit of phenylpropionate dioxygenase [EC:1.14.12.19]	large terminal subunit of phenylpropionate dioxygenase	EC:1.14.12.19	Metabolism; Amino Acid Metabolism; Phenylalanine metabolism	Metabolism	Amino Acid Metabolism	Phenylalanine metabolism	0	0	0	0	0	0	0	0	0	0	0	0	0	0	0	0	1.70077e-08	0	0	1.14942e-08	0	1.78886e-08	0	1.5159e-08	1.49586e-08	9.69181e-09	0	7.78177e-09	0	9.60589e-09	0	0	0	0	1.37165e-08	0	0	0	0	0	0
K05877	methyl-accepting chemotaxis protein IV, peptide sensor receptor	methyl-accepting chemotaxis protein IV, peptide sensor receptor	methyl-accepting chemotaxis protein IV, peptide sensor receptor	0	Cellular Processes; Cell Motility; Bacterial motility proteins|Cellular Processes; Cell Motility; Bacterial chemotaxis|Environmental Information Processing; Signal Transduction; Two-component system	Cellular Processes	Cell Motility	Bacterial motility proteins	0	0	0	0	0	0	0	0	0	0	0	0	0	0	0	0	0	0	0	0	1.18371e-08	0	0	0	0	0	0	2.33453e-08	0	3.84236e-08	0	0	0	0	0	0	0	0	0	0	0
K08085	type IV fimbrial biogenesis protein FimU	type IV fimbrial biogenesis protein FimU	type IV fimbrial biogenesis protein FimU	0	Environmental Information Processing; Membrane Transport; Secretion system	Environmental Information Processing	Membrane Transport	Secretion system	0	0	0	0	0	0	0	0	0	0	0	0	0	0	0	0	0	0	0	0	0	0	0	0	0	0	0	0	0	0	0	0	0	0	0	0	0	0	0	0	1.48723e-08
K10211	4,4-diaponeurosporenoate glycosyltransferase [EC:2.4.1.-]	4,4'-diaponeurosporenoate glycosyltransferase [EC:2.4.1.-]	4,4'-diaponeurosporenoate glycosyltransferase	EC:2.4.1.-	Metabolism; Metabolism of Terpenoids and Polyketides; Carotenoid biosynthesis	Metabolism	Metabolism of Terpenoids and Polyketides	Carotenoid biosynthesis	0	0	2.07403e-08	0	0	0	0	0	0	0	0	0	0	0	0	0	8.50386e-09	0	0	0	0	0	0	0	0	0	0	0	0	9.60589e-09	0	0	0	0	0	0	0	0	0	0	0
K00186	2-oxoisovalerate ferredoxin oxidoreductase, alpha subunit [EC:1.2.7.7]	2-oxoisovalerate ferredoxin oxidoreductase, alpha subunit [EC:1.2.7.7]	2-oxoisovalerate ferredoxin oxidoreductase, alpha subunit	EC:1.2.7.7	Metabolism; Amino Acid Metabolism; Valine, leucine and isoleucine degradation	Metabolism	Amino Acid Metabolism	Valine, leucine and isoleucine degradation	0	0	0	2.34669e-08	0	0	0	0	3.17175e-08	3.68427e-08	0	0	0	0	2.1035e-08	0	0	0	0	0	0	0	0	0	0	0	3.82259e-08	0	1.44843e-08	1.92118e-08	0	0	0	0	0	0	4.9459e-08	0	0	0	5.9489e-08
K00187	2-oxoisovalerate ferredoxin oxidoreductase, beta subunit [EC:1.2.7.7]	2-oxoisovalerate ferredoxin oxidoreductase, beta subunit [EC:1.2.7.7]	2-oxoisovalerate ferredoxin oxidoreductase, beta subunit	EC:1.2.7.7	Metabolism; Amino Acid Metabolism; Valine, leucine and isoleucine degradation	Metabolism	Amino Acid Metabolism	Valine, leucine and isoleucine degradation	0	0	0	2.34669e-08	0	0	0	0	3.17175e-08	3.68427e-08	0	0	0	0	2.1035e-08	0	0	0	0	0	0	0	0	0	0	0	3.82259e-08	0	1.44843e-08	1.92118e-08	0	0	0	0	0	0	4.9459e-08	0	0	0	5.9489e-08
K00188	2-oxoisovalerate ferredoxin oxidoreductase, delta subunit [EC:1.2.7.7]	2-oxoisovalerate ferredoxin oxidoreductase, delta subunit [EC:1.2.7.7]	2-oxoisovalerate ferredoxin oxidoreductase, delta subunit	EC:1.2.7.7	Metabolism; Amino Acid Metabolism; Valine, leucine and isoleucine degradation	Metabolism	Amino Acid Metabolism	Valine, leucine and isoleucine degradation	0	0	0	2.34669e-08	0	0	0	0	3.17175e-08	3.68427e-08	0	0	0	0	2.1035e-08	0	0	0	0	0	0	0	0	0	0	0	3.82259e-08	0	1.44843e-08	1.92118e-08	0	0	0	0	0	0	4.9459e-08	0	0	0	5.9489e-08
K14949	serine/threonine-protein kinase PknG [EC:2.7.11.1]	serine/threonine-protein kinase PknG [EC:2.7.11.1]	serine/threonine-protein kinase PknG	EC:2.7.11.1	None	None	0	0	0	1.68604e-08	0	0	0	0	0	0	0	0	0	1.94043e-08	0	0	3.15525e-08	0	8.50386e-09	1.28672e-08	0	0	0	0	1.41466e-08	1.5159e-08	0	0	0	7.78177e-09	0	9.60589e-09	0	0	0	0	0	0	0	1.00284e-08	0	0	0
K08985	putative lipoprotein	putative lipoprotein	putative lipoprotein	0	Unclassified; Poorly Characterized; Function unknown	Unclassified	Poorly Characterized	Function unknown	0	0	0	0	0	0	0	0	0	0	0	0	0	0	0	0	0	0	0	0	0	0	0	0	0	0	0	0	0	0	0	0	0	0	0	0	0	0	0	0	1.48723e-08
K08989	putative membrane protein	putative membrane protein	putative membrane protein	0	Unclassified; Poorly Characterized; Function unknown	Unclassified	Poorly Characterized	Function unknown	0	0	0	1.17334e-08	0	0	0	0	0	0	0	0	1.09115e-08	2.33996e-08	1.05175e-08	0	8.50386e-09	0	0	0	0	0	0	1.5159e-08	0	0	0	0	0	9.60589e-09	0	0	0	0	2.7433e-08	0	0	1.00284e-08	1.15533e-08	3.53673e-08	1.48723e-08
K00510	heme oxygenase [EC:1.14.99.3]	heme oxygenase [EC:1.14.99.3]	heme oxygenase	EC:1.14.99.3	Organismal Systems; Digestive System; Mineral absorption|Metabolism; Metabolism of Cofactors and Vitamins; Porphyrin and chlorophyll metabolism	Organismal Systems	Digestive System	Mineral absorption	0	0	0	0	0	0	0	0	0	0	0	1.94043e-08	0	0	1.05175e-08	0	8.50386e-09	1.28672e-08	0	0	0	0	0	1.5159e-08	0	0	0	7.78177e-09	0	9.60589e-09	0	0	0	0	0	0	0	0	0	0	0
K05971	None	None	None	0	Unclassified; Metabolism; Others	Unclassified	Metabolism	Others	2.55007e-08	0	0	4.69338e-08	0	2.16084e-08	2.32067e-08	2.15452e-08	3.17175e-08	1.10528e-07	0	0	2.18231e-08	0	0	0	0	2.57344e-08	0	6.89652e-08	0	0	0	0	0	1.93836e-08	3.82259e-08	0	1.44843e-08	0	3.54505e-08	0	0	0	0	0	0	2.00568e-08	2.0796e-07	1.65047e-07	0
K02448	nitric-oxide reductase NorD protein [EC:1.7.99.7]; nitric oxide reductase NorD protein	nitric-oxide reductase NorD protein [EC:1.7.99.7]; nitric oxide reductase NorD protein	nitric-oxide reductase NorD protein	EC:1.7.99.7	Metabolism; Energy Metabolism; Nitrogen metabolism	Metabolism	Energy Metabolism	Nitrogen metabolism	0	0	0	0	0	0	0	0	0	0	0	0	0	0	0	0	0	0	0	0	0	0	0	0	0	0	0	0	0	0	8.86264e-09	0	0	0	0	0	0	0	0	0	1.48723e-08
K13007	Fuc2NAc and GlcNAc transferase [EC:2.4.1.-]	Fuc2NAc and GlcNAc transferase [EC:2.4.1.-]	Fuc2NAc and GlcNAc transferase	EC:2.4.1.-	Metabolism; Glycan Biosynthesis and Metabolism; Glycosyltransferases|Metabolism; Glycan Biosynthesis and Metabolism; Lipopolysaccharide biosynthesis proteins	Metabolism	Glycan Biosynthesis and Metabolism	Glycosyltransferases	0	0	0	0	0	0	0	0	0	0	0	0	0	0	0	0	0	0	0	0	0	1.78886e-08	0	0	0	0	0	0	0	0	0	0	0	0	0	0	0	0	0	0	1.48723e-08
K10814	hydrogen cyanide synthase HcnA [EC:1.4.99.5]	hydrogen cyanide synthase HcnA [EC:1.4.99.5]	hydrogen cyanide synthase HcnA	EC:1.4.99.5	Metabolism; Metabolism of Other Amino Acids; Cyanoamino acid metabolism|Environmental Information Processing; Signaling Molecules and Interaction; Bacterial toxins	Metabolism	Metabolism of Other Amino Acids	Cyanoamino acid metabolism	0	0	0	0	0	0	0	0	0	0	0	0	0	0	0	0	0	0	0	0	0	0	0	0	0	0	0	0	0	0	0	0	0	0	0	0	0	0	0	0	1.48723e-08
K10816	hydrogen cyanide synthase HcnC [EC:1.4.99.5]	hydrogen cyanide synthase HcnC [EC:1.4.99.5]	hydrogen cyanide synthase HcnC	EC:1.4.99.5	Metabolism; Metabolism of Other Amino Acids; Cyanoamino acid metabolism|Environmental Information Processing; Signaling Molecules and Interaction; Bacterial toxins	Metabolism	Metabolism of Other Amino Acids	Cyanoamino acid metabolism	0	0	0	0	0	0	0	0	0	0	0	0	0	0	0	0	0	0	0	0	0	0	0	0	0	0	0	0	0	0	0	0	0	0	0	0	0	0	0	0	1.48723e-08
K06214	curli production assembly/transport component CsgG	curli production assembly/transport component CsgG	curli production assembly/transport component CsgG	0	Environmental Information Processing; Membrane Transport; Secretion system	Environmental Information Processing	Membrane Transport	Secretion system	0	0	0	0	0	0	0	0	0	0	0	0	1.09115e-08	2.33996e-08	1.05175e-08	0	0	0	0	0	0	0	0	1.5159e-08	0	0	0	0	0	9.60589e-09	0	0	0	0	2.7433e-08	0	0	1.00284e-08	1.15533e-08	0	0
K02305	nitric-oxide reductase, cytochrome c-containing subunit II [EC:1.7.99.7]; nitric oxide reductase, cytochrome c-containing subunit II	nitric-oxide reductase, cytochrome c-containing subunit II [EC:1.7.99.7]; nitric oxide reductase, cytochrome c-containing subunit II	nitric-oxide reductase, cytochrome c-containing subunit II	EC:1.7.99.7	Metabolism; Energy Metabolism; Nitrogen metabolism	Metabolism	Energy Metabolism	Nitrogen metabolism	0	0	0	0	0	1.08042e-08	0	0	0	0	0	0	0	0	0	0	0	0	0	0	0	0	0	0	0	0	0	0	0	0	8.86264e-09	0	0	0	0	0	0	0	0	0	1.48723e-08
K12437	polyketide synthase 13	polyketide synthase 13	polyketide synthase 13	0	Metabolism; Lipid Metabolism; Lipid biosynthesis proteins	Metabolism	Lipid Metabolism	Lipid biosynthesis proteins	0	0	0	0	0	0	0	0	0	0	0	0	0	0	2.1035e-08	0	0	0	0	0	0	0	1.41466e-08	0	0	0	0	0	0	0	0	0	0	0	0	0	0	0	0	0	0
K00539	None	None	None	0	Metabolism; Xenobiotics Biodegradation and Metabolism; Chloroalkane and chloroalkene degradation|Metabolism; Xenobiotics Biodegradation and Metabolism; Chlorocyclohexane and chlorobenzene degradation|Metabolism; Xenobiotics Biodegradation and Metabolism; Bisphenol degradation|Metabolism; Xenobiotics Biodegradation and Metabolism; 1,1,1-Trichloro-2,2-bis(4-chlorophenyl)ethane (DDT) degradation	Metabolism	Xenobiotics Biodegradation and Metabolism	Chloroalkane and chloroalkene degradation	0	0	0	0	0	0	0	0	0	0	0	0	0	0	0	0	8.50386e-09	0	0	0	0	0	0	0	1.49586e-08	0	0	0	0	9.60589e-09	0	0	0	0	0	0	0	0	0	0	0
K14268	5-aminovalerate aminotransferase [EC:2.6.1.48]	5-aminovalerate aminotransferase [EC:2.6.1.48]	5-aminovalerate aminotransferase	EC:2.6.1.48	Metabolism; Amino Acid Metabolism; Lysine degradation|Metabolism; Amino Acid Metabolism; Amino acid related enzymes	Metabolism	Amino Acid Metabolism	Lysine degradation	0	0	0	0	0	0	0	0	0	0	0	0	0	0	0	0	0	0	0	0	0	0	0	0	0	0	0	0	0	0	0	0	0	0	0	0	0	0	0	0	1.48723e-08
K14269	glutarate semialdehyde dehydrogenase [EC:1.2.1.20]	glutarate semialdehyde dehydrogenase [EC:1.2.1.20]	glutarate semialdehyde dehydrogenase	EC:1.2.1.20	Metabolism; Amino Acid Metabolism; Lysine degradation	Metabolism	Amino Acid Metabolism	Lysine degradation	0	0	0	0	0	0	0	0	0	0	0	0	0	0	0	0	0	0	0	0	0	0	0	0	0	0	0	0	0	0	8.86264e-09	0	0	0	0	0	0	0	0	1.17891e-08	2.97445e-08
K01483	ureidoglycolate hydrolase [EC:3.5.3.19]	ureidoglycolate hydrolase [EC:3.5.3.19]	ureidoglycolate hydrolase	EC:3.5.3.19	Metabolism; Nucleotide Metabolism; Purine metabolism	Metabolism	Nucleotide Metabolism	Purine metabolism	1.27503e-08	0	0	0	1.05707e-08	0	0	0	0	0	0	0	1.09115e-08	4.67992e-08	0	0	1.70077e-08	2.57344e-08	0	0	0	3.57771e-08	1.41466e-08	0	1.49586e-08	9.69181e-09	0	7.78177e-09	0	9.60589e-09	1.77253e-08	6.00113e-09	0	0	0	0	1.64863e-08	1.00284e-08	1.15533e-08	3.53673e-08	7.43613e-08
K08685	quinohemoprotein amine dehydrogenase [EC:1.4.98.1]; amine dehydrogenase [EC:1.4.99.3]	quinohemoprotein amine dehydrogenase [EC:1.4.98.1]; amine dehydrogenase [EC:1.4.99.3]	quinohemoprotein amine dehydrogenase	EC:1.4.98.1	Metabolism; Energy Metabolism; Methane metabolism	Metabolism	Energy Metabolism	Methane metabolism	0	0	0	0	0	0	0	0	0	0	0	0	0	0	0	0	8.50386e-09	0	0	0	0	0	0	0	1.49586e-08	0	0	7.78177e-09	0	9.60589e-09	0	0	0	0	0	0	0	0	0	0	0
K08687	N-carbamoylsarcosine amidase [EC:3.5.1.59]	N-carbamoylsarcosine amidase [EC:3.5.1.59]	N-carbamoylsarcosine amidase	EC:3.5.1.59	Metabolism; Amino Acid Metabolism; Arginine and proline metabolism	Metabolism	Amino Acid Metabolism	Arginine and proline metabolism	0	0	0	0	0	0	0	0	0	0	0	0	0	0	0	0	0	0	0	0	0	0	0	0	0	0	0	0	0	0	8.86264e-09	0	0	0	0	0	0	0	0	0	1.48723e-08
K08686	2-chlorobenzoate 1,2-dioxygenase [EC:1.14.12.13]	2-chlorobenzoate 1,2-dioxygenase [EC:1.14.12.13]	2-chlorobenzoate 1,2-dioxygenase	EC:1.14.12.13	Metabolism; Xenobiotics Biodegradation and Metabolism; Fluorobenzoate degradation	Metabolism	Xenobiotics Biodegradation and Metabolism	Fluorobenzoate degradation	0	0	0	0	0	0	0	0	0	0	0	0	0	0	0	0	0	0	0	0	0	0	0	0	0	0	0	0	0	0	0	0	0	0	0	0	0	0	0	0	0
K04940	opine dehydrogenase [EC:1.5.1.28]	opine dehydrogenase [EC:1.5.1.28]	opine dehydrogenase	EC:1.5.1.28	Unclassified; Metabolism; Others	Unclassified	Metabolism	Others	0	0	0	0	0	0	0	0	0	0	0	0	0	0	0	0	0	0	0	0	0	0	0	0	0	0	0	0	0	0	8.86264e-09	0	0	0	0	0	0	0	0	0	1.48723e-08
K03418	N,N-dimethylformamidase [EC:3.5.1.56]	N,N-dimethylformamidase [EC:3.5.1.56]	N,N-dimethylformamidase	EC:3.5.1.56	Metabolism; Carbohydrate Metabolism; Glyoxylate and dicarboxylate metabolism	Metabolism	Carbohydrate Metabolism	Glyoxylate and dicarboxylate metabolism	0	0	0	0	0	0	0	0	0	0	0	0	0	0	0	0	0	0	0	0	0	0	0	0	0	0	0	0	0	0	8.86264e-09	0	0	0	0	0	0	0	0	0	1.48723e-08
K13540	precorrin-2 C20-methyltransferase / precorrin-3B C17-methyltransferase [EC:2.1.1.130 2.1.1.131]	precorrin-2 C20-methyltransferase / precorrin-3B C17-methyltransferase [EC:2.1.1.130 2.1.1.131]	precorrin-2 C20-methyltransferase / precorrin-3B C17-methyltransferase	EC:2.1.1.130	Metabolism; Metabolism of Cofactors and Vitamins; Porphyrin and chlorophyll metabolism	Metabolism	Metabolism of Cofactors and Vitamins	Porphyrin and chlorophyll metabolism	0	1.68604e-08	0	0	0	0	0	0	0	0	0	1.94043e-08	0	0	3.15525e-08	0	0	1.28672e-08	0	0	0	0	1.41466e-08	1.5159e-08	0	0	0	7.78177e-09	0	0	0	0	0	0	0	0	0	1.00284e-08	0	0	0
K12145	hydrogenase-4 component J [EC:1.-.-.-]	hydrogenase-4 component J [EC:1.-.-.-]	hydrogenase-4 component J	EC:1.-.-.-	Unclassified; Metabolism; Energy metabolism	Unclassified	Metabolism	Energy metabolism	0	0	0	0	0	0	0	0	0	0	0	0	0	0	0	0	0	1.28672e-08	0	0	0	0	0	0	0	0	0	1.55635e-08	0	1.92118e-08	0	0	0	0	0	0	0	0	0	0	0
K12144	hydrogenase-4 component I [EC:1.-.-.-]	hydrogenase-4 component I [EC:1.-.-.-]	hydrogenase-4 component I	EC:1.-.-.-	Unclassified; Metabolism; Energy metabolism	Unclassified	Metabolism	Energy metabolism	0	0	0	0	0	0	0	0	0	0	0	0	0	0	0	0	0	1.28672e-08	0	0	0	0	0	0	0	0	0	1.55635e-08	0	1.92118e-08	0	0	0	0	0	0	0	0	0	0	0
K12142	hydrogenase-4 component G [EC:1.-.-.-]	hydrogenase-4 component G [EC:1.-.-.-]	hydrogenase-4 component G	EC:1.-.-.-	Unclassified; Metabolism; Energy metabolism	Unclassified	Metabolism	Energy metabolism	0	0	0	0	0	0	0	0	0	0	0	0	0	0	0	0	0	1.28672e-08	0	0	0	0	0	0	0	0	0	1.55635e-08	0	1.92118e-08	0	0	0	0	0	0	0	0	0	0	0
K10815	hydrogen cyanide synthase HcnB [EC:1.4.99.5]	hydrogen cyanide synthase HcnB [EC:1.4.99.5]	hydrogen cyanide synthase HcnB	EC:1.4.99.5	Metabolism; Metabolism of Other Amino Acids; Cyanoamino acid metabolism|Environmental Information Processing; Signaling Molecules and Interaction; Bacterial toxins	Metabolism	Metabolism of Other Amino Acids	Cyanoamino acid metabolism	0	0	0	0	0	0	0	0	0	0	0	0	0	0	0	0	0	0	0	0	0	0	0	0	0	0	0	0	0	0	0	0	0	0	0	0	0	0	0	0	1.48723e-08
K01415	endothelin-converting enzyme [EC:3.4.24.71]	endothelin-converting enzyme [EC:3.4.24.71]	endothelin-converting enzyme	EC:3.4.24.71	Metabolism; Enzyme Families; Peptidases	Metabolism	Enzyme Families	Peptidases	0	0	0	0	0	0	0	0	0	0	0	0	0	0	0	0	0	0	0	1.14942e-08	0	0	0	0	0	0	0	0	0	0	0	0	0	0	0	0	0	0	0	0	0
K10210	4,4-diaponeurosporene oxidase [EC:1.-.-.-]	4,4'-diaponeurosporene oxidase [EC:1.-.-.-]	4,4'-diaponeurosporene oxidase	EC:1.-.-.-	Metabolism; Metabolism of Terpenoids and Polyketides; Carotenoid biosynthesis	Metabolism	Metabolism of Terpenoids and Polyketides	Carotenoid biosynthesis	0	0	2.07403e-08	0	0	0	0	0	0	0	0	0	0	0	0	0	8.50386e-09	0	0	0	0	0	0	0	0	0	0	0	0	9.60589e-09	0	0	0	0	0	0	0	0	0	0	0
K03202	type IV secretion system protein VirB7	type IV secretion system protein VirB7	type IV secretion system protein VirB7	0	Environmental Information Processing; Membrane Transport; Secretion system|Environmental Information Processing; Membrane Transport; Bacterial secretion system	Environmental Information Processing	Membrane Transport	Secretion system	0	0	0	0	0	0	0	0	0	0	0	0	0	0	0	0	0	0	0	0	0	0	0	0	0	0	0	0	0	0	8.86264e-09	0	0	0	0	0	0	0	0	0	1.48723e-08
K03208	colanic acid biosynthesis glycosyl transferase WcaI	colanic acid biosynthesis glycosyl transferase WcaI	colanic acid biosynthesis glycosyl transferase WcaI	0	Unclassified; Cellular Processes and Signaling; Membrane and intracellular structural molecules	Unclassified	Cellular Processes and Signaling	Membrane and intracellular structural molecules	0	0	0	0	0	0	0	0	0	0	0	0	0	2.33996e-08	0	0	0	0	0	0	0	0	0	0	0	0	0	0	0	0	0	0	0	0	0	0	0	1.00284e-08	0	1.17891e-08	1.48723e-08
K09461	anthraniloyl-CoA monooxygenase [EC:1.14.13.40]	anthraniloyl-CoA monooxygenase [EC:1.14.13.40]	anthraniloyl-CoA monooxygenase	EC:1.14.13.40	Metabolism; Xenobiotics Biodegradation and Metabolism; Aminobenzoate degradation	Metabolism	Xenobiotics Biodegradation and Metabolism	Aminobenzoate degradation	1.27503e-08	0	0	0	0	0	0	0	0	0	0	0	1.09115e-08	4.67992e-08	0	0	1.70077e-08	2.57344e-08	0	0	0	1.78886e-08	0	0	1.49586e-08	0	0	7.78177e-09	0	9.60589e-09	8.86264e-09	0	0	0	0	0	0	1.00284e-08	1.15533e-08	2.35782e-08	4.46168e-08
K00477	phytanoyl-CoA hydroxylase [EC:1.14.11.18]	phytanoyl-CoA hydroxylase [EC:1.14.11.18]	phytanoyl-CoA hydroxylase	EC:1.14.11.18	Cellular Processes; Transport and Catabolism; Peroxisome	Cellular Processes	Transport and Catabolism	Peroxisome	0	0	0	0	0	0	0	0	0	0	0	0	0	0	0	0	8.50386e-09	0	0	0	0	0	0	0	1.49586e-08	0	0	0	0	9.60589e-09	0	0	0	0	0	0	0	0	0	0	0
K00470	None	None	None	0	Unclassified; Metabolism; Others	Unclassified	Metabolism	Others	0	0	0	0	0	0	0	1.07726e-08	0	0	0	0	0	0	0	0	0	0	0	0	0	0	0	0	0	0	0	0	0	0	0	0	0	0	0	0	0	0	1.15533e-08	0	0
K00471	gamma-butyrobetaine dioxygenase [EC:1.14.11.1]	gamma-butyrobetaine dioxygenase [EC:1.14.11.1]	gamma-butyrobetaine dioxygenase	EC:1.14.11.1	Metabolism; Amino Acid Metabolism; Lysine degradation	Metabolism	Amino Acid Metabolism	Lysine degradation	0	0	0	0	0	0	0	0	0	0	0	0	0	0	0	0	0	0	0	0	0	0	0	0	0	0	0	0	0	0	0	0	0	0	0	0	1.64863e-08	0	1.15533e-08	0	1.48723e-08
K00479	Rieske 2Fe-2S family protein	Rieske 2Fe-2S family protein	Rieske 2Fe-2S family protein	0	Unclassified; Poorly Characterized; General function prediction only	Unclassified	Poorly Characterized	General function prediction only	0	0	0	0	0	0	0	0	0	0	0	0	0	0	0	0	0	0	0	0	0	1.78886e-08	0	0	0	0	0	0	0	0	1.77253e-08	0	0	0	0	0	1.64863e-08	0	0	1.17891e-08	4.46168e-08
K09926	hypothetical protein	hypothetical protein	hypothetical protein	0	Unclassified; Poorly Characterized; Function unknown	Unclassified	Poorly Characterized	Function unknown	1.27503e-08	0	0	0	1.05707e-08	0	0	0	0	0	0	0	1.09115e-08	7.01987e-08	0	0	2.55116e-08	2.57344e-08	0	0	0	1.78886e-08	0	0	1.49586e-08	9.69181e-09	0	7.78177e-09	0	9.60589e-09	0	0	1.67492e-08	0	1.37165e-08	0	0	1.00284e-08	2.31067e-08	4.71564e-08	5.9489e-08
K03692	glucosylglycerol-phosphate synthase [EC:2.4.1.213]	glucosylglycerol-phosphate synthase [EC:2.4.1.213]	glucosylglycerol-phosphate synthase	EC:2.4.1.213	Unclassified; Metabolism; Carbohydrate metabolism	Unclassified	Metabolism	Carbohydrate metabolism	0	0	0	0	0	0	0	0	0	0	0	0	0	2.33996e-08	0	0	0	0	0	0	0	0	0	0	0	0	0	0	0	0	0	0	0	0	0	0	0	1.00284e-08	0	1.17891e-08	1.48723e-08
K07338	hypothetical protein	hypothetical protein	hypothetical protein	0	Unclassified; Cellular Processes and Signaling; Cell motility and secretion	Unclassified	Cellular Processes and Signaling	Cell motility and secretion	1.27503e-08	0	0	0	0	0	0	0	0	0	0	0	1.09115e-08	4.67992e-08	0	0	1.70077e-08	2.57344e-08	0	0	0	1.78886e-08	0	0	1.49586e-08	9.69181e-09	0	7.78177e-09	0	9.60589e-09	1.77253e-08	0	0	0	0	0	1.64863e-08	1.00284e-08	1.15533e-08	2.35782e-08	5.9489e-08
K05991	None	None	None	0	Unclassified; Metabolism; Others	Unclassified	Metabolism	Others	0	0	0	0	0	0	0	0	0	0	0	1.94043e-08	0	0	1.05175e-08	0	0	1.28672e-08	0	0	0	0	0	1.5159e-08	0	0	0	7.78177e-09	0	0	0	0	0	0	0	0	0	0	0	0	0
K00317	trimethylamine dehydrogenase [EC:1.5.8.2]	trimethylamine dehydrogenase [EC:1.5.8.2]	trimethylamine dehydrogenase	EC:1.5.8.2	Metabolism; Energy Metabolism; Methane metabolism	Metabolism	Energy Metabolism	Methane metabolism	0	0	0	0	0	0	0	0	0	0	0	0	0	0	0	0	0	0	1.11979e-08	1.14942e-08	1.18371e-08	0	0	1.5159e-08	0	9.69181e-09	0	0	7.24216e-09	1.92118e-08	0	1.80034e-08	1.67492e-08	0	0	0	0	1.00284e-08	0	1.17891e-08	0
K00316	spermidine dehydrogenase [EC:1.5.99.6]	spermidine dehydrogenase [EC:1.5.99.6]	spermidine dehydrogenase	EC:1.5.99.6	Metabolism; Metabolism of Other Amino Acids; beta-Alanine metabolism|Metabolism; Amino Acid Metabolism; Arginine and proline metabolism	Metabolism	Metabolism of Other Amino Acids	beta-Alanine metabolism	0	0	0	0	0	0	0	0	0	0	0	0	0	0	0	0	0	0	0	0	0	0	0	0	0	0	0	0	0	0	8.86264e-09	0	0	0	0	0	0	0	0	0	1.48723e-08
K00314	sarcosine dehydrogenase [EC:1.5.99.1]	sarcosine dehydrogenase [EC:1.5.99.1]	sarcosine dehydrogenase	EC:1.5.99.1	Metabolism; Amino Acid Metabolism; Glycine, serine and threonine metabolism	Metabolism	Amino Acid Metabolism	Glycine, serine and threonine metabolism	0	0	0	0	0	0	0	0	0	0	0	0	0	0	0	0	0	0	0	0	0	0	0	0	0	0	0	0	0	0	3.54505e-08	0	0	0	0	0	0	0	1.15533e-08	2.35782e-08	5.9489e-08
K00300	None	None	None	0	Unclassified; Metabolism; Others	Unclassified	Metabolism	Others	1.27503e-08	0	0	2.34669e-08	0	1.08042e-08	1.16033e-08	1.07726e-08	1.58588e-08	5.5264e-08	0	0	1.09115e-08	0	0	0	0	1.28672e-08	0	3.44826e-08	0	0	0	0	0	9.69181e-09	1.91129e-08	0	7.24216e-09	0	1.77253e-08	0	0	0	0	0	0	1.00284e-08	1.0398e-07	8.25237e-08	0
K02641	ferredoxin--NADP+ reductase [EC:1.18.1.2]	ferredoxin--NADP+ reductase [EC:1.18.1.2]	ferredoxin--NADP+ reductase	EC:1.18.1.2	Metabolism; Energy Metabolism; Photosynthesis proteins|Metabolism; Energy Metabolism; Photosynthesis	Metabolism	Energy Metabolism	Photosynthesis proteins	1.27503e-08	0	0	2.34669e-08	0	1.08042e-08	1.16033e-08	1.07726e-08	1.58588e-08	5.5264e-08	0	0	1.09115e-08	0	0	0	0	1.28672e-08	0	3.44826e-08	0	0	0	0	0	9.69181e-09	1.91129e-08	0	7.24216e-09	0	1.77253e-08	0	0	0	0	0	0	1.00284e-08	1.0398e-07	8.25237e-08	0
K09990	hypothetical protein	hypothetical protein	hypothetical protein	0	Unclassified; Poorly Characterized; Function unknown	Unclassified	Poorly Characterized	Function unknown	1.27503e-08	0	0	0	1.05707e-08	0	0	0	0	0	0	0	1.09115e-08	7.01987e-08	0	0	1.70077e-08	2.57344e-08	0	0	0	1.78886e-08	0	0	1.49586e-08	9.69181e-09	0	7.78177e-09	7.24216e-09	1.92118e-08	1.77253e-08	0	1.67492e-08	0	1.37165e-08	0	0	1.00284e-08	1.15533e-08	4.71564e-08	7.43613e-08
K09994	PhnO protein [EC:2.3.1.-]	PhnO protein [EC:2.3.1.-]	PhnO protein	EC:2.3.1.-	Unclassified; Poorly Characterized; General function prediction only	Unclassified	Poorly Characterized	General function prediction only	7.6502e-08	0	0	0	3.17121e-08	0	0	0	1.58588e-08	0	0	0	0	0	1.05175e-08	0	0	0	0	0	1.18371e-08	0	0	0	0	0	0	0	7.24216e-09	0	8.86264e-09	6.00113e-09	0	0	0	0	0	0	0	0	2.97445e-08
K01504	glucosamine-6-phosphate isomerase [EC:3.5.99.6]	glucosamine-6-phosphate isomerase [EC:3.5.99.6]	glucosamine-6-phosphate isomerase	EC:3.5.99.6	Unclassified; Metabolism; Carbohydrate metabolism	Unclassified	Metabolism	Carbohydrate metabolism	0	0	0	0	0	0	0	0	0	0	0	0	0	2.33996e-08	0	0	0	0	0	0	0	1.78886e-08	0	0	0	0	0	0	0	0	8.86264e-09	0	0	0	0	0	0	0	0	2.35782e-08	2.97445e-08
K12107	cag pathogenicity island protein 22	cag pathogenicity island protein 22	cag pathogenicity island protein 22	0	Environmental Information Processing; Membrane Transport; Secretion system	Environmental Information Processing	Membrane Transport	Secretion system	0	0	0	0	0	0	0	0	0	0	0	0	0	0	0	0	0	1.28672e-08	0	0	0	0	0	0	0	0	0	0	0	0	0	0	0	0	0	0	0	0	0	0	0
K00663	aminoglycoside N6-acetyltransferase [EC:2.3.1.82]	aminoglycoside N6'-acetyltransferase [EC:2.3.1.82]	aminoglycoside N6'-acetyltransferase	EC:2.3.1.82	Unclassified; Metabolism; Others	Unclassified	Metabolism	Others	0	0	0	2.34669e-08	0	0	0	0	3.17175e-08	3.68427e-08	0	0	1.09115e-08	0	2.1035e-08	0	0	0	0	0	0	0	0	0	0	0	3.82259e-08	0	1.44843e-08	1.92118e-08	8.86264e-09	0	0	0	0	0	4.9459e-08	0	0	1.17891e-08	7.43613e-08
K06992	None	None	None	0	Unclassified; Poorly Characterized; General function prediction only	Unclassified	Poorly Characterized	General function prediction only	0	0	0	0	0	0	0	0	0	0	0	0	0	0	1.2621e-07	1.53477e-08	1.70077e-08	0	6.71874e-08	5.7471e-08	0	1.07331e-07	1.41466e-08	4.54771e-07	4.78677e-07	5.3305e-07	1.45258e-06	3.26834e-07	0	0	0	6.00113e-09	0	0	0	0	0	0	0	0	1.48723e-08
K00594	xylitol oxidase [EC:1.1.3.41]	xylitol oxidase [EC:1.1.3.41]	xylitol oxidase	EC:1.1.3.41	Unclassified; Metabolism; Others	Unclassified	Metabolism	Others	0	0	0	0	0	0	0	0	0	0	0	0	0	0	0	0	0	0	0	0	0	0	0	0	0	0	0	0	0	0	0	0	0	0	0	0	0	0	0	0	0
K04102	4,5-dihydroxyphthalate decarboxylase [EC:4.1.1.55]	4,5-dihydroxyphthalate decarboxylase [EC:4.1.1.55]	4,5-dihydroxyphthalate decarboxylase	EC:4.1.1.55	Metabolism; Xenobiotics Biodegradation and Metabolism; Polycyclic aromatic hydrocarbon degradation	Metabolism	Xenobiotics Biodegradation and Metabolism	Polycyclic aromatic hydrocarbon degradation	1.27503e-08	0	0	0	0	0	0	0	0	0	0	0	1.09115e-08	4.67992e-08	0	0	1.70077e-08	2.57344e-08	0	0	0	1.78886e-08	0	0	1.49586e-08	0	0	7.78177e-09	0	9.60589e-09	0	0	0	0	0	0	0	1.00284e-08	1.15533e-08	2.35782e-08	2.97445e-08
K13772	Rrf2 family transcriptional regulator, iron-responsive regulator	Rrf2 family transcriptional regulator, iron-responsive regulator	Rrf2 family transcriptional regulator, iron-responsive regulator	0	Genetic Information Processing; Transcription; Transcription factors	Genetic Information Processing	Transcription	Transcription factors	0	0	0	0	0	0	0	0	0	0	0	0	0	0	0	0	0	0	0	0	0	0	0	0	0	0	0	0	0	0	8.86264e-09	0	0	0	0	0	0	0	0	0	1.48723e-08
K13774	citronellol/citronellal dehydrogenase	citronellol/citronellal dehydrogenase	citronellol/citronellal dehydrogenase	0	Metabolism; Metabolism of Terpenoids and Polyketides; Geraniol degradation	Metabolism	Metabolism of Terpenoids and Polyketides	Geraniol degradation	0	0	0	0	0	0	0	0	0	0	0	0	0	0	0	0	0	0	0	0	0	0	0	0	0	0	0	0	0	0	0	0	0	0	0	0	0	0	0	0	1.48723e-08
K13777	geranyl-CoA carboxylase alpha subunit [EC:6.4.1.5]	geranyl-CoA carboxylase alpha subunit [EC:6.4.1.5]	geranyl-CoA carboxylase alpha subunit	EC:6.4.1.5	Metabolism; Metabolism of Terpenoids and Polyketides; Geraniol degradation	Metabolism	Metabolism of Terpenoids and Polyketides	Geraniol degradation	0	0	0	0	0	0	0	0	0	0	0	0	0	0	0	0	0	0	0	0	0	0	0	0	0	0	0	0	7.24216e-09	0	0	0	0	0	0	0	0	0	0	0	1.48723e-08
K13776	citronellyl-CoA synthetase [EC:6.2.1.-]	citronellyl-CoA synthetase [EC:6.2.1.-]	citronellyl-CoA synthetase	EC:6.2.1.-	Metabolism; Lipid Metabolism; Lipid biosynthesis proteins|Metabolism; Metabolism of Terpenoids and Polyketides; Geraniol degradation	Metabolism	Lipid Metabolism	Lipid biosynthesis proteins	0	0	0	0	0	0	0	0	0	0	0	0	0	0	0	0	0	0	0	0	0	0	0	0	0	0	0	0	0	0	0	0	0	0	0	0	0	0	0	0	1.48723e-08
K13779	isohexenylglutaconyl-CoA hydratase [EC:4.2.1.57]	isohexenylglutaconyl-CoA hydratase [EC:4.2.1.57]	isohexenylglutaconyl-CoA hydratase	EC:4.2.1.57	Metabolism; Metabolism of Terpenoids and Polyketides; Geraniol degradation	Metabolism	Metabolism of Terpenoids and Polyketides	Geraniol degradation	0	0	0	0	0	0	0	0	0	0	0	0	0	0	0	0	0	0	0	0	0	0	0	0	0	0	0	0	0	0	0	0	0	0	0	0	0	0	0	0	1.48723e-08
K13778	geranyl-CoA carboxylase beta subunit [EC:6.4.1.5]	geranyl-CoA carboxylase beta subunit [EC:6.4.1.5]	geranyl-CoA carboxylase beta subunit	EC:6.4.1.5	Metabolism; Metabolism of Terpenoids and Polyketides; Geraniol degradation	Metabolism	Metabolism of Terpenoids and Polyketides	Geraniol degradation	0	0	0	0	0	0	0	0	0	0	0	0	0	0	0	0	0	0	0	0	0	0	0	0	0	0	0	0	7.24216e-09	0	0	0	0	0	0	0	0	0	0	0	1.48723e-08
K02623	LysR family transcriptional regulator, pca operon transcriptional activator	LysR family transcriptional regulator, pca operon transcriptional activator	LysR family transcriptional regulator, pca operon transcriptional activator	0	Genetic Information Processing; Transcription; Transcription factors	Genetic Information Processing	Transcription	Transcription factors	0	0	0	0	0	0	0	0	0	0	0	0	0	0	0	0	0	0	0	0	0	0	0	0	0	0	0	0	0	0	8.86264e-09	0	0	0	0	0	0	0	0	0	1.48723e-08
K08286	protein-serine/threonine kinase [EC:2.7.11.-]	protein-serine/threonine kinase [EC:2.7.11.-]	protein-serine/threonine kinase	EC:2.7.11.-	Unclassified; Cellular Processes and Signaling; Signal transduction mechanisms	Unclassified	Cellular Processes and Signaling	Signal transduction mechanisms	0	0	0	0	0	0	0	0	0	0	0	0	0	0	0	0	0	0	0	0	0	0	0	0	0	0	0	0	0	0	0	0	0	0	0	0	0	0	0	0	1.48723e-08
K11731	citronellyl-CoA dehydrogenase [EC:1.3.99.-]	citronellyl-CoA dehydrogenase [EC:1.3.99.-]	citronellyl-CoA dehydrogenase	EC:1.3.99.-	Metabolism; Metabolism of Terpenoids and Polyketides; Geraniol degradation	Metabolism	Metabolism of Terpenoids and Polyketides	Geraniol degradation	0	0	0	0	0	0	0	0	0	0	0	0	0	0	0	0	0	0	0	0	0	0	0	0	0	0	0	0	7.24216e-09	0	0	0	0	0	0	0	0	0	0	0	1.48723e-08
K07476	toprim domain protein	toprim domain protein	toprim domain protein	0	Unclassified; Genetic Information Processing; Replication, recombination and repair proteins	Unclassified	Genetic Information Processing	Replication, recombination and repair proteins	0	0	2.07403e-08	0	0	0	0	0	0	0	0	0	0	0	0	0	8.50386e-09	0	0	0	0	0	0	0	0	0	0	0	0	1.92118e-08	0	0	0	0	0	0	0	0	0	0	0
K00122	formate dehydrogenase [EC:1.2.1.2]	formate dehydrogenase [EC:1.2.1.2]	formate dehydrogenase	EC:1.2.1.2	Metabolism; Carbohydrate Metabolism; Glyoxylate and dicarboxylate metabolism|Metabolism; Energy Metabolism; Methane metabolism	Metabolism	Carbohydrate Metabolism	Glyoxylate and dicarboxylate metabolism	0	0	0	0	0	0	0	0	0	0	0	0	0	0	0	0	0	0	0	0	0	0	0	0	0	0	0	0	0	0	8.86264e-09	0	0	0	0	0	0	0	0	1.17891e-08	2.97445e-08
K00126	formate dehydrogenase, delta subunit [EC:1.2.1.2]	formate dehydrogenase, delta subunit [EC:1.2.1.2]	formate dehydrogenase, delta subunit	EC:1.2.1.2	Metabolism; Carbohydrate Metabolism; Glyoxylate and dicarboxylate metabolism|Metabolism; Energy Metabolism; Methane metabolism	Metabolism	Carbohydrate Metabolism	Glyoxylate and dicarboxylate metabolism	1.27503e-08	0	0	0	0	0	0	0	0	0	0	0	1.09115e-08	4.67992e-08	0	0	1.70077e-08	2.57344e-08	0	0	0	1.78886e-08	0	0	1.49586e-08	0	0	7.78177e-09	0	9.60589e-09	8.86264e-09	0	0	0	0	0	0	1.00284e-08	1.15533e-08	2.35782e-08	5.9489e-08
K14347	solute carrier family 10 (sodium/bile acid cotransporter), member 7	solute carrier family 10 (sodium/bile acid cotransporter), member 7	solute carrier family 10 (sodium/bile acid cotransporter), member 7	0	None	None	0	0	0	0	0	0	0	0	0	0	0	0	0	0	0	0	0	0	0	0	0	0	0	0	0	0	0	0	0	0	0	0	0	0	0	0	0	0	0	0	0	0	0
K08977	putative membrane protein	putative membrane protein	putative membrane protein	0	Unclassified; Poorly Characterized; Function unknown	Unclassified	Poorly Characterized	Function unknown	2.55007e-08	5.05811e-08	2.07403e-08	1.17334e-08	0	0	5.80167e-08	9.69533e-08	4.75763e-08	3.68427e-08	0	0	0	0	1.05175e-08	0	0	1.28672e-08	0	1.14942e-08	0	1.78886e-08	2.82933e-08	3.03181e-08	0	9.69181e-09	1.91129e-08	7.78177e-09	0	0	1.77253e-08	0	0	2.84464e-08	0	0	0	0	1.15533e-08	1.17891e-08	0
K13525	transitional endoplasmic reticulum ATPase	transitional endoplasmic reticulum ATPase	transitional endoplasmic reticulum ATPase	0	Genetic Information Processing; Folding, Sorting and Degradation; Protein processing in endoplasmic reticulum	Genetic Information Processing	Folding, Sorting and Degradation	Protein processing in endoplasmic reticulum	0	0	0	0	0	0	2.32067e-08	2.15452e-08	0	0	0	0	0	0	0	0	0	0	0	0	0	0	2.82933e-08	0	0	0	0	0	0	9.60589e-09	0	1.20023e-08	0	0	0	0	1.64863e-08	0	0	0	2.97445e-08
K03384	None	None	None	0	Metabolism; Xenobiotics Biodegradation and Metabolism; Chlorocyclohexane and chlorobenzene degradation|Metabolism; Xenobiotics Biodegradation and Metabolism; Toluene degradation|Metabolism; Xenobiotics Biodegradation and Metabolism; Naphthalene degradation|Metabolism; Xenobiotics Biodegradation and Metabolism; Polycyclic aromatic hydrocarbon degradation|Metabolism; Xenobiotics Biodegradation and …	Metabolism	Xenobiotics Biodegradation and Metabolism	Chlorocyclohexane and chlorobenzene degradation	0	0	0	0	0	0	0	0	0	0	0	0	0	0	0	0	8.50386e-09	0	0	0	0	0	0	0	1.49586e-08	0	0	0	0	9.60589e-09	0	0	0	0	0	0	0	0	0	0	0
K03381	catechol 1,2-dioxygenase [EC:1.13.11.1]	catechol 1,2-dioxygenase [EC:1.13.11.1]	catechol 1,2-dioxygenase	EC:1.13.11.1	Metabolism; Xenobiotics Biodegradation and Metabolism; Toluene degradation|Metabolism; Xenobiotics Biodegradation and Metabolism; Chlorocyclohexane and chlorobenzene degradation|Metabolism; Xenobiotics Biodegradation and Metabolism; Fluorobenzoate degradation|Metabolism; Xenobiotics Biodegradation and Metabolism; Benzoate degradation	Metabolism	Xenobiotics Biodegradation and Metabolism	Toluene degradation	0	0	0	0	0	1.08042e-08	0	0	0	0	0	0	0	0	0	0	8.50386e-09	0	0	0	0	1.78886e-08	0	0	1.49586e-08	9.69181e-09	0	7.78177e-09	0	9.60589e-09	0	0	0	0	0	0	1.64863e-08	0	0	0	1.48723e-08
K11695	peptidoglycan pentaglycine glycine transferase (the fourth and fifth glycine) [EC:2.3.2.-]	peptidoglycan pentaglycine glycine transferase (the fourth and fifth glycine) [EC:2.3.2.-]	peptidoglycan pentaglycine glycine transferase (the fourth and fifth glycine)	EC:2.3.2.-	Metabolism; Glycan Biosynthesis and Metabolism; Peptidoglycan biosynthesis	Metabolism	Glycan Biosynthesis and Metabolism	Peptidoglycan biosynthesis	0	0	2.07403e-08	0	0	0	0	0	0	0	0	0	0	0	0	0	8.50386e-09	0	0	0	0	0	0	0	0	0	0	0	0	1.92118e-08	0	0	0	0	0	0	0	0	0	0	0
K11693	peptidoglycan pentaglycine glycine transferase (the first glycine) [EC:2.3.2.-]	peptidoglycan pentaglycine glycine transferase (the first glycine) [EC:2.3.2.-]	peptidoglycan pentaglycine glycine transferase (the first glycine)	EC:2.3.2.-	Metabolism; Glycan Biosynthesis and Metabolism; Peptidoglycan biosynthesis	Metabolism	Glycan Biosynthesis and Metabolism	Peptidoglycan biosynthesis	0	0	2.07403e-08	0	0	0	0	0	0	0	0	0	0	0	0	0	8.50386e-09	0	0	1.14942e-08	1.18371e-08	0	0	0	0	0	0	7.78177e-09	7.24216e-09	2.88177e-08	0	1.20023e-08	0	0	0	0	0	0	1.15533e-08	0	0
K03433	proteasome beta subunit [EC:3.4.25.1]	proteasome beta subunit [EC:3.4.25.1]	proteasome beta subunit	EC:3.4.25.1	Metabolism; Enzyme Families; Peptidases|Genetic Information Processing; Folding, Sorting and Degradation; Proteasome	Metabolism	Enzyme Families	Peptidases	0	0	0	1.17334e-08	0	0	2.32067e-08	2.15452e-08	0	0	0	0	0	0	0	0	0	0	0	0	0	0	2.82933e-08	0	0	0	0	0	0	9.60589e-09	0	1.20023e-08	0	0	0	0	1.64863e-08	1.00284e-08	0	0	2.97445e-08
K13832	3-dehydroquinate dehydratase / shikimate dehydrogenase [EC:4.2.1.10 1.1.1.25]	3-dehydroquinate dehydratase / shikimate dehydrogenase [EC:4.2.1.10 1.1.1.25]	3-dehydroquinate dehydratase / shikimate dehydrogenase	EC:4.2.1.10	Metabolism; Amino Acid Metabolism; Phenylalanine, tyrosine and tryptophan biosynthesis	Metabolism	Amino Acid Metabolism	Phenylalanine, tyrosine and tryptophan biosynthesis	0	0	0	0	0	0	0	0	0	0	0	0	0	0	0	0	0	0	0	1.14942e-08	0	0	0	0	0	0	0	0	0	0	0	0	0	0	0	0	0	0	0	0	0
K03432	proteasome alpha subunit [EC:3.4.25.1]	proteasome alpha subunit [EC:3.4.25.1]	proteasome alpha subunit	EC:3.4.25.1	Metabolism; Enzyme Families; Peptidases|Genetic Information Processing; Folding, Sorting and Degradation; Proteasome	Metabolism	Enzyme Families	Peptidases	0	0	0	0	0	0	0	0	0	0	0	0	0	0	0	0	0	0	0	0	0	0	0	0	0	0	0	0	0	0	0	0	0	0	0	0	0	0	0	0	0
K11474	GntR family transcriptional regulator, glc operon transcriptional activator	GntR family transcriptional regulator, glc operon transcriptional activator	GntR family transcriptional regulator, glc operon transcriptional activator	0	Genetic Information Processing; Transcription; Transcription factors	Genetic Information Processing	Transcription	Transcription factors	0	0	0	0	0	0	0	0	0	0	0	0	0	0	0	0	8.50386e-09	0	0	0	0	0	0	0	1.49586e-08	0	0	0	0	9.60589e-09	0	0	0	0	0	0	0	0	0	0	0
K11476	GntR family transcriptional regulator, gluconate operon transcriptional repressor	GntR family transcriptional regulator, gluconate operon transcriptional repressor	GntR family transcriptional regulator, gluconate operon transcriptional repressor	0	Genetic Information Processing; Transcription; Transcription factors	Genetic Information Processing	Transcription	Transcription factors	0	0	2.07403e-08	0	0	0	0	0	0	0	0	0	0	0	0	0	8.50386e-09	0	0	0	0	0	0	0	0	0	0	0	0	1.92118e-08	0	0	0	0	0	0	0	0	0	0	0
K00607	None	None	None	0	Unclassified; Metabolism; Others	Unclassified	Metabolism	Others	0	0	0	0	0	0	0	0	0	0	0	0	0	2.33996e-08	0	0	0	0	0	0	0	0	0	0	0	0	0	0	0	0	8.86264e-09	0	0	0	0	0	0	1.00284e-08	0	2.35782e-08	2.97445e-08
K09650	rhomboid-like protein [EC:3.4.21.105]	rhomboid-like protein [EC:3.4.21.105]	rhomboid-like protein	EC:3.4.21.105	Metabolism; Enzyme Families; Peptidases	Metabolism	Enzyme Families	Peptidases	0	0	0	0	0	0	0	0	0	0	0	0	0	2.33996e-08	0	0	0	0	0	0	0	0	0	0	0	0	0	0	0	0	0	0	0	0	0	0	0	1.00284e-08	0	1.17891e-08	1.48723e-08
K07807	hypothetical protein NreA	hypothetical protein NreA	hypothetical protein NreA	0	Unclassified; Poorly Characterized; Function unknown	Unclassified	Poorly Characterized	Function unknown	0	0	0	2.34669e-08	0	0	0	0	3.17175e-08	3.68427e-08	0	0	0	0	2.1035e-08	0	0	0	0	0	0	0	0	0	0	0	3.82259e-08	0	1.44843e-08	1.92118e-08	8.86264e-09	0	0	0	0	0	4.9459e-08	0	0	0	7.43613e-08
K10253	DOPA 4,5-dioxygenase [EC:1.14.99.-]	DOPA 4,5-dioxygenase [EC:1.14.99.-]	DOPA 4,5-dioxygenase	EC:1.14.99.-	Unclassified; Metabolism; Biosynthesis and biodegradation of secondary metabolites	Unclassified	Metabolism	Biosynthesis and biodegradation of secondary metabolites	0	0	0	0	0	0	0	0	0	0	0	0	0	0	0	0	0	0	0	0	0	0	0	0	0	0	0	0	0	0	0	0	0	0	0	0	0	0	0	0	1.48723e-08
K01959	pyruvate carboxylase subunit A [EC:6.4.1.1]	pyruvate carboxylase subunit A [EC:6.4.1.1]	pyruvate carboxylase subunit A	EC:6.4.1.1	Metabolism; Carbohydrate Metabolism; Citrate cycle (TCA cycle)|Metabolism; Energy Metabolism; Carbon fixation pathways in prokaryotes|Metabolism; Carbohydrate Metabolism; Pyruvate metabolism	Metabolism	Carbohydrate Metabolism	Citrate cycle (TCA cycle)	0	0	0	0	0	0	0	0	0	0	0	0	0	0	1.2621e-07	1.53477e-08	1.70077e-08	0	6.71874e-08	5.7471e-08	0	1.07331e-07	0	4.54771e-07	4.78677e-07	5.3305e-07	1.45258e-06	3.26834e-07	0	0	0	6.00113e-09	0	0	0	0	0	0	0	0	1.48723e-08
K00141	benzaldehyde dehydrogenase (NAD) [EC:1.2.1.28]	benzaldehyde dehydrogenase (NAD) [EC:1.2.1.28]	benzaldehyde dehydrogenase (NAD)	EC:1.2.1.28	Metabolism; Xenobiotics Biodegradation and Metabolism; Toluene degradation|Metabolism; Xenobiotics Biodegradation and Metabolism; Xylene degradation|Metabolism; Xenobiotics Biodegradation and Metabolism; Aminobenzoate degradation	Metabolism	Xenobiotics Biodegradation and Metabolism	Toluene degradation	0	0	0	0	0	0	0	0	0	0	0	0	0	0	0	0	8.50386e-09	0	0	0	0	1.78886e-08	0	0	1.49586e-08	9.69181e-09	0	0	0	9.60589e-09	0	0	0	0	0	0	0	0	0	0	0
K04712	sphingolipid delta-4 desaturase [EC:1.14.-.-]	sphingolipid delta-4 desaturase [EC:1.14.-.-]	sphingolipid delta-4 desaturase	EC:1.14.-.-	Metabolism; Lipid Metabolism; Lipid biosynthesis proteins|Metabolism; Lipid Metabolism; Sphingolipid metabolism	Metabolism	Lipid Metabolism	Lipid biosynthesis proteins	0	0	0	0	0	0	0	0	0	0	0	0	0	2.33996e-08	0	0	0	0	0	0	0	0	0	0	0	0	0	0	0	0	0	0	0	0	0	0	0	1.00284e-08	0	1.17891e-08	1.48723e-08
K13815	two-component system, response regulator RpfG	two-component system, response regulator RpfG	two-component system, response regulator RpfG	0	Environmental Information Processing; Signal Transduction; Two-component system	Environmental Information Processing	Signal Transduction	Two-component system	0	0	0	0	1.05707e-08	0	0	0	0	0	0	0	0	2.33996e-08	0	0	8.50386e-09	0	0	0	0	0	0	0	0	0	0	0	0	0	0	0	0	0	1.37165e-08	0	0	0	1.15533e-08	1.17891e-08	0
K02803	PTS system, N-acetylglucosamine-specific IIB component [EC:2.7.1.69]	PTS system, N-acetylglucosamine-specific IIB component [EC:2.7.1.69]	PTS system, N-acetylglucosamine-specific IIB component	EC:2.7.1.69	Metabolism; Carbohydrate Metabolism; Amino sugar and nucleotide sugar metabolism|Environmental Information Processing; Membrane Transport; Phosphotransferase system (PTS)|Environmental Information Processing; Membrane Transport; Transporters	Metabolism	Carbohydrate Metabolism	Amino sugar and nucleotide sugar metabolism	0	0	0	0	0	0	0	0	0	0	0	0	0	0	0	0	0	0	0	0	0	0	0	0	0	0	0	0	0	0	0	0	0	0	0	0	0	0	0	0	0
K10233	alpha-glucoside transport system permease protein	alpha-glucoside transport system permease protein	alpha-glucoside transport system permease protein	0	Environmental Information Processing; Membrane Transport; ABC transporters|Environmental Information Processing; Membrane Transport; Transporters	Environmental Information Processing	Membrane Transport	ABC transporters	0	0	0	0	0	0	0	0	0	0	0	0	0	0	0	0	0	0	0	0	0	0	0	0	0	0	0	0	0	0	8.86264e-09	0	0	0	0	0	0	0	1.15533e-08	0	1.48723e-08
K10232	alpha-glucoside transport system substrate-binding protein	alpha-glucoside transport system substrate-binding protein	alpha-glucoside transport system substrate-binding protein	0	Environmental Information Processing; Membrane Transport; ABC transporters|Environmental Information Processing; Membrane Transport; Transporters	Environmental Information Processing	Membrane Transport	ABC transporters	0	0	0	0	0	0	0	0	0	0	0	0	0	0	0	0	0	0	0	0	0	0	0	0	0	0	0	0	0	0	8.86264e-09	0	0	0	0	0	0	0	1.15533e-08	0	1.48723e-08
K10235	alpha-glucoside transport system ATP-binding protein	alpha-glucoside transport system ATP-binding protein	alpha-glucoside transport system ATP-binding protein	0	Environmental Information Processing; Membrane Transport; ABC transporters|Environmental Information Processing; Membrane Transport; Transporters	Environmental Information Processing	Membrane Transport	ABC transporters	0	0	0	0	0	0	0	0	0	0	0	0	0	0	0	0	0	0	0	0	0	0	0	0	0	0	0	0	0	0	8.86264e-09	0	0	0	0	0	0	0	0	0	1.48723e-08
K10234	alpha-glucoside transport system permease protein	alpha-glucoside transport system permease protein	alpha-glucoside transport system permease protein	0	Environmental Information Processing; Membrane Transport; ABC transporters|Environmental Information Processing; Membrane Transport; Transporters	Environmental Information Processing	Membrane Transport	ABC transporters	0	0	0	0	0	0	0	0	0	0	0	0	0	0	0	0	0	0	0	0	0	0	0	0	0	0	0	0	0	0	8.86264e-09	0	0	0	0	0	0	0	1.15533e-08	0	1.48723e-08
K01970	None	None	None	0	Unclassified; Metabolism; Others	Unclassified	Metabolism	Others	2.55007e-08	5.05811e-08	2.07403e-08	1.17334e-08	0	0	5.80167e-08	9.69533e-08	4.75763e-08	3.68427e-08	0	0	0	0	1.05175e-08	0	0	1.28672e-08	0	1.14942e-08	0	1.78886e-08	2.82933e-08	3.03181e-08	0	9.69181e-09	1.91129e-08	7.78177e-09	0	0	1.77253e-08	0	0	2.84464e-08	0	0	0	0	1.15533e-08	1.17891e-08	0
K13786	cob(II)yrinic acid a,c-diamide reductase [EC:1.16.8.1]	cob(II)yrinic acid a,c-diamide reductase [EC:1.16.8.1]	cob(II)yrinic acid a,c-diamide reductase	EC:1.16.8.1	Metabolism; Metabolism of Cofactors and Vitamins; Porphyrin and chlorophyll metabolism	Metabolism	Metabolism of Cofactors and Vitamins	Porphyrin and chlorophyll metabolism	0	0	0	0	0	0	0	0	0	0	0	0	0	0	0	0	0	0	0	0	0	0	0	0	0	0	0	0	0	0	8.86264e-09	0	0	0	0	0	0	0	0	0	1.48723e-08
K01283	peptidyl-dipeptidase A [EC:3.4.15.1]	peptidyl-dipeptidase A [EC:3.4.15.1]	peptidyl-dipeptidase A	EC:3.4.15.1	Metabolism; Enzyme Families; Peptidases|Human Diseases; Infectious Diseases; Chagas disease (American trypanosomiasis)|Organismal Systems; Endocrine System; Renin-angiotensin system|Environmental Information Processing; Signaling Molecules and Interaction; Cellular antigens|Human Diseases; Cardiovascular Diseases; Hypertrophic cardiomyopathy (HCM)	Metabolism	Enzyme Families	Peptidases	0	0	0	0	1.05707e-08	0	0	0	0	0	0	0	0	2.33996e-08	0	0	1.70077e-08	0	0	0	0	0	0	0	0	0	0	0	0	0	0	0	0	0	1.37165e-08	0	0	0	1.15533e-08	1.17891e-08	0
K14048	urease subunit gamma/beta [EC:3.5.1.5]	urease subunit gamma/beta [EC:3.5.1.5]	urease subunit gamma/beta	EC:3.5.1.5	Metabolism; Xenobiotics Biodegradation and Metabolism; Atrazine degradation|Human Diseases; Infectious Diseases; Epithelial cell signaling in Helicobacter pylori infection|Metabolism; Nucleotide Metabolism; Purine metabolism|Metabolism; Amino Acid Metabolism; Arginine and proline metabolism	Metabolism	Xenobiotics Biodegradation and Metabolism	Atrazine degradation	0	0	0	0	0	0	0	0	0	0	0	0	0	0	1.2621e-07	0	1.70077e-08	0	6.71874e-08	5.7471e-08	0	1.07331e-07	0	4.54771e-07	4.78677e-07	5.23358e-07	1.45258e-06	3.26834e-07	0	0	0	0	0	0	0	0	0	0	0	0	0
K14136	phosphoribose diphosphate:decaprenyl-phosphate phosphoribosyltransferase	phosphoribose diphosphate:decaprenyl-phosphate phosphoribosyltransferase	phosphoribose diphosphate:decaprenyl-phosphate phosphoribosyltransferase	0	Metabolism; Metabolism of Terpenoids and Polyketides; Prenyltransferases	Metabolism	Metabolism of Terpenoids and Polyketides	Prenyltransferases	0	1.68604e-08	0	0	0	0	0	0	0	0	0	1.94043e-08	0	0	3.15525e-08	0	8.50386e-09	1.28672e-08	0	0	0	0	1.41466e-08	1.5159e-08	0	0	0	7.78177e-09	0	9.60589e-09	0	0	0	0	0	0	0	1.00284e-08	0	0	0
K03532	trimethylamine-N-oxide reductase (cytochrome c) 1, cytochrome c-type subunit TorC	trimethylamine-N-oxide reductase (cytochrome c) 1, cytochrome c-type subunit TorC	trimethylamine-N-oxide reductase (cytochrome c) 1, cytochrome c-type subunit TorC	0	Environmental Information Processing; Signal Transduction; Two-component system	Environmental Information Processing	Signal Transduction	Two-component system	0	0	0	0	0	0	0	0	0	0	0	0	0	0	1.2621e-07	0	1.70077e-08	0	6.71874e-08	5.7471e-08	0	1.07331e-07	0	4.54771e-07	4.78677e-07	5.23358e-07	1.45258e-06	3.26834e-07	0	0	0	0	0	0	1.37165e-08	0	0	0	0	0	0
K02225	cobalamin biosynthetic protein CobC	cobalamin biosynthetic protein CobC	cobalamin biosynthetic protein CobC	0	Metabolism; Metabolism of Cofactors and Vitamins; Porphyrin and chlorophyll metabolism	Metabolism	Metabolism of Cofactors and Vitamins	Porphyrin and chlorophyll metabolism	0	0	0	0	0	0	0	0	0	0	0	0	0	0	0	0	0	0	0	0	0	1.78886e-08	1.41466e-08	0	0	0	0	0	0	0	8.86264e-09	0	0	0	0	0	1.64863e-08	0	0	1.17891e-08	2.97445e-08
K03285	general bacterial porin, GBP family	general bacterial porin, GBP family	general bacterial porin, GBP family	0	Unclassified; Cellular Processes and Signaling; Pores ion channels	Unclassified	Cellular Processes and Signaling	Pores ion channels	0	0	0	0	0	0	0	0	0	0	0	0	1.09115e-08	0	0	0	0	1.28672e-08	0	0	0	0	0	0	0	0	0	0	0	0	0	0	0	0	0	0	0	0	0	0	1.48723e-08
K12683	serum resistance protein	serum resistance protein	serum resistance protein	0	Environmental Information Processing; Membrane Transport; Secretion system|Human Diseases; Infectious Diseases; Pertussis	Environmental Information Processing	Membrane Transport	Secretion system	0	0	0	0	0	0	0	0	0	0	0	0	0	0	0	0	8.50386e-09	0	0	0	0	0	0	0	1.49586e-08	0	0	0	0	9.60589e-09	0	0	0	0	0	0	0	0	0	0	0
K06347	kinase-associated protein B	kinase-associated protein B	kinase-associated protein B	0	Environmental Information Processing; Signal Transduction; Two-component system	Environmental Information Processing	Signal Transduction	Two-component system	0	0	2.07403e-08	0	0	0	0	0	0	0	0	0	0	0	0	0	8.50386e-09	0	0	0	0	0	0	0	0	0	0	0	0	1.92118e-08	0	0	0	0	0	0	0	0	0	0	0
K11337	3-hydroxyethyl bacteriochlorophyllide a dehydrogenase [EC:1.-.-.-]	3-hydroxyethyl bacteriochlorophyllide a dehydrogenase [EC:1.-.-.-]	3-hydroxyethyl bacteriochlorophyllide a dehydrogenase	EC:1.-.-.-	Metabolism; Metabolism of Cofactors and Vitamins; Porphyrin and chlorophyll metabolism	Metabolism	Metabolism of Cofactors and Vitamins	Porphyrin and chlorophyll metabolism	0	0	0	2.34669e-08	0	0	0	0	3.17175e-08	3.68427e-08	0	0	1.09115e-08	0	2.1035e-08	0	0	0	0	0	0	0	0	0	0	0	3.82259e-08	0	1.44843e-08	1.92118e-08	0	0	0	0	1.37165e-08	0	4.9459e-08	1.00284e-08	0	0	5.9489e-08
K01564	None	None	None	0	Metabolism; Xenobiotics Biodegradation and Metabolism; Chloroalkane and chloroalkene degradation|Metabolism; Xenobiotics Biodegradation and Metabolism; Atrazine degradation	Metabolism	Xenobiotics Biodegradation and Metabolism	Chloroalkane and chloroalkene degradation	0	0	0	0	0	0	0	0	0	0	0	0	0	0	1.2621e-07	1.53477e-08	1.70077e-08	0	6.71874e-08	5.7471e-08	0	1.07331e-07	0	4.54771e-07	4.78677e-07	5.3305e-07	1.45258e-06	3.26834e-07	0	0	0	6.00113e-09	0	0	0	0	0	0	0	0	1.48723e-08
K05556	hydroxylacyl-CoA dehydrogenase [EC:1.1.1.-]; ketoreductase RED1 [EC:1.1.1.-]	hydroxylacyl-CoA dehydrogenase [EC:1.1.1.-]; ketoreductase RED1 [EC:1.1.1.-]	hydroxylacyl-CoA dehydrogenase	EC:1.1.1.-	Metabolism; Metabolism of Terpenoids and Polyketides; Biosynthesis of type II polyketide products	Metabolism	Metabolism of Terpenoids and Polyketides	Biosynthesis of type II polyketide products	0	0	0	0	0	0	0	0	0	0	0	0	0	0	2.1035e-08	0	0	0	0	0	0	0	1.41466e-08	0	0	0	0	0	0	0	0	0	0	0	0	0	0	0	0	0	0
K05550	benzoate 1,2-dioxygenase beta subunit [EC:1.14.12.10]	benzoate 1,2-dioxygenase beta subunit [EC:1.14.12.10]	benzoate 1,2-dioxygenase beta subunit	EC:1.14.12.10	Metabolism; Xenobiotics Biodegradation and Metabolism; Fluorobenzoate degradation|Metabolism; Xenobiotics Biodegradation and Metabolism; Benzoate degradation	Metabolism	Xenobiotics Biodegradation and Metabolism	Fluorobenzoate degradation	0	0	0	0	0	0	0	0	0	0	0	0	0	0	0	0	8.50386e-09	0	0	0	0	1.78886e-08	0	0	1.49586e-08	9.69181e-09	0	0	0	9.60589e-09	0	0	0	0	0	0	0	0	0	0	0
K12306	MFS transporter, FLVCR family, MFS-domain-containing protein 7	MFS transporter, FLVCR family, MFS-domain-containing protein 7	MFS transporter, FLVCR family, MFS-domain-containing protein 7	0	Environmental Information Processing; Membrane Transport; Transporters	Environmental Information Processing	Membrane Transport	Transporters	0	0	0	0	0	0	0	0	0	0	0	0	0	0	1.05175e-08	0	0	0	0	0	1.18371e-08	0	0	0	0	0	0	0	7.24216e-09	0	8.86264e-09	6.00113e-09	0	0	0	0	0	0	0	0	2.97445e-08
K06139	pyrroloquinoline quinone biosynthesis protein E	pyrroloquinoline quinone biosynthesis protein E	pyrroloquinoline quinone biosynthesis protein E	0	Unclassified; Poorly Characterized; General function prediction only	Unclassified	Poorly Characterized	General function prediction only	0	0	0	0	0	0	0	0	0	0	0	0	0	0	0	0	0	0	0	0	0	0	0	0	0	0	0	0	7.24216e-09	0	0	0	0	0	0	0	0	0	0	0	1.48723e-08
K06135	pyrroloquinoline quinone biosynthesis protein A	pyrroloquinoline quinone biosynthesis protein A	pyrroloquinoline quinone biosynthesis protein A	0	Unclassified; Poorly Characterized; General function prediction only	Unclassified	Poorly Characterized	General function prediction only	0	0	0	0	0	0	0	0	0	0	0	0	0	0	0	0	0	0	0	0	0	0	0	0	0	0	0	0	0	0	0	0	0	0	0	0	0	0	0	0	0
K06136	pyrroloquinoline quinone biosynthesis protein B	pyrroloquinoline quinone biosynthesis protein B	pyrroloquinoline quinone biosynthesis protein B	0	Unclassified; Poorly Characterized; General function prediction only	Unclassified	Poorly Characterized	General function prediction only	0	0	0	0	0	0	0	0	0	0	0	0	0	0	0	0	0	0	0	0	0	0	0	0	0	0	0	7.78177e-09	7.24216e-09	0	0	0	0	0	0	0	0	0	0	0	1.48723e-08
K09977	hypothetical protein	hypothetical protein	hypothetical protein	0	Unclassified; Poorly Characterized; Function unknown	Unclassified	Poorly Characterized	Function unknown	0	0	0	0	0	0	0	0	0	0	0	0	0	0	0	0	0	0	0	0	0	0	0	0	0	0	0	0	0	0	0	0	0	0	0	0	0	0	0	0	1.48723e-08
K11437	protein arginine N-methyltransferase 6 [EC:2.1.1.-]	protein arginine N-methyltransferase 6 [EC:2.1.1.-]	protein arginine N-methyltransferase 6	EC:2.1.1.-	Genetic Information Processing; Replication and Repair; Chromosome	Genetic Information Processing	Replication and Repair	Chromosome	1.27503e-08	0	0	2.34669e-08	0	1.08042e-08	1.16033e-08	1.07726e-08	1.58588e-08	5.5264e-08	0	0	1.09115e-08	0	0	0	0	1.28672e-08	0	3.44826e-08	0	0	0	0	0	9.69181e-09	1.91129e-08	0	7.24216e-09	0	1.77253e-08	0	0	0	0	0	0	1.00284e-08	1.0398e-07	8.25237e-08	0
K01917	glutathionylspermidine synthase [EC:6.3.1.8]	glutathionylspermidine synthase [EC:6.3.1.8]	glutathionylspermidine synthase	EC:6.3.1.8	Metabolism; Metabolism of Other Amino Acids; Glutathione metabolism	Metabolism	Metabolism of Other Amino Acids	Glutathione metabolism	0	0	0	0	0	0	0	0	0	0	0	0	0	0	1.2621e-07	0	1.70077e-08	0	6.71874e-08	5.7471e-08	0	1.07331e-07	0	4.54771e-07	4.78677e-07	5.23358e-07	1.45258e-06	3.26834e-07	0	0	0	0	0	0	0	0	0	0	0	1.17891e-08	0
K07772	two-component system, OmpR family, torCAD operon response regulator TorR	two-component system, OmpR family, torCAD operon response regulator TorR	two-component system, OmpR family, torCAD operon response regulator TorR	0	Environmental Information Processing; Signal Transduction; Two-component system	Environmental Information Processing	Signal Transduction	Two-component system	0	0	0	0	0	0	0	0	0	0	0	0	0	0	0	0	0	0	0	0	0	0	0	0	0	0	0	0	0	0	8.86264e-09	0	0	0	0	0	0	0	0	0	1.48723e-08
K00207	dihydropyrimidine dehydrogenase (NADP+) [EC:1.3.1.2]	dihydropyrimidine dehydrogenase (NADP+) [EC:1.3.1.2]	dihydropyrimidine dehydrogenase (NADP+)	EC:1.3.1.2	Metabolism; Metabolism of Other Amino Acids; beta-Alanine metabolism|Metabolism; Nucleotide Metabolism; Pyrimidine metabolism|Metabolism; Metabolism of Cofactors and Vitamins; Pantothenate and CoA biosynthesis|Metabolism; Xenobiotics Biodegradation and Metabolism; Drug metabolism - other enzymes	Metabolism	Metabolism of Other Amino Acids	beta-Alanine metabolism	1.27503e-08	0	0	0	0	0	0	0	0	0	0	0	1.09115e-08	4.67992e-08	0	0	8.50386e-09	2.57344e-08	0	0	0	1.78886e-08	1.41466e-08	0	0	0	0	0	0	0	1.77253e-08	6.00113e-09	0	0	0	0	0	1.00284e-08	1.15533e-08	2.35782e-08	5.9489e-08
K13714	bifunctional autolysin [EC:3.5.1.28 3.2.1.96]	bifunctional autolysin [EC:3.5.1.28 3.2.1.96]	bifunctional autolysin	EC:3.5.1.28	Unclassified; Cellular Processes and Signaling; Membrane and intracellular structural molecules	Unclassified	Cellular Processes and Signaling	Membrane and intracellular structural molecules	0	0	2.07403e-08	0	1.05707e-08	0	0	0	1.58588e-08	0	0	0	0	0	0	0	8.50386e-09	0	0	0	0	0	0	0	0	0	0	7.78177e-09	7.24216e-09	3.84236e-08	0	6.00113e-09	0	0	0	0	0	0	1.15533e-08	0	0
K12518	outer membrane usher protein PapC	outer membrane usher protein PapC	outer membrane usher protein PapC	0	Environmental Information Processing; Membrane Transport; Secretion system	Environmental Information Processing	Membrane Transport	Secretion system	0	0	0	0	0	0	0	0	0	0	0	0	0	0	0	0	0	0	0	0	1.18371e-08	0	0	0	0	0	0	2.33453e-08	0	3.84236e-08	0	0	0	0	0	0	0	0	0	0	0
K12519	chaperone protein PapD	chaperone protein PapD	chaperone protein PapD	0	Environmental Information Processing; Membrane Transport; Secretion system	Environmental Information Processing	Membrane Transport	Secretion system	0	0	0	0	0	0	0	0	0	0	0	0	0	0	0	0	0	0	0	0	1.18371e-08	0	0	0	0	0	0	2.33453e-08	0	3.84236e-08	0	0	0	0	0	0	0	0	0	0	0
K12517	major pilin subunit PapA	major pilin subunit PapA	major pilin subunit PapA	0	Environmental Information Processing; Membrane Transport; Secretion system	Environmental Information Processing	Membrane Transport	Secretion system	0	0	0	0	0	0	0	0	0	0	0	0	0	0	0	0	0	0	0	0	1.18371e-08	0	0	0	0	0	0	2.33453e-08	0	3.84236e-08	0	0	0	0	0	0	0	0	0	0	0
K09804	hypothetical protein	hypothetical protein	hypothetical protein	0	Unclassified; Poorly Characterized; Function unknown	Unclassified	Poorly Characterized	Function unknown	0	0	0	0	0	0	0	0	0	0	0	0	0	0	1.2621e-07	0	1.70077e-08	0	6.71874e-08	6.89652e-08	0	1.07331e-07	0	4.54771e-07	4.78677e-07	5.23358e-07	1.45258e-06	3.26834e-07	0	0	0	0	0	0	0	0	0	0	0	0	0
K12989	mannosyltransferase [EC:2.4.1.-]	mannosyltransferase [EC:2.4.1.-]	mannosyltransferase	EC:2.4.1.-	Metabolism; Glycan Biosynthesis and Metabolism; Glycosyltransferases|Metabolism; Glycan Biosynthesis and Metabolism; Lipopolysaccharide biosynthesis proteins	Metabolism	Glycan Biosynthesis and Metabolism	Glycosyltransferases	0	0	0	0	0	0	0	0	0	0	0	0	0	0	0	0	0	0	0	0	0	0	0	0	0	0	0	0	0	0	8.86264e-09	0	0	0	0	0	0	0	0	0	1.48723e-08
K12988	alpha-1,3-rhamnosyltransferase [EC:2.4.1.-]	alpha-1,3-rhamnosyltransferase [EC:2.4.1.-]	alpha-1,3-rhamnosyltransferase	EC:2.4.1.-	Metabolism; Glycan Biosynthesis and Metabolism; Glycosyltransferases|Metabolism; Glycan Biosynthesis and Metabolism; Lipopolysaccharide biosynthesis proteins	Metabolism	Glycan Biosynthesis and Metabolism	Glycosyltransferases	0	0	0	0	0	0	0	0	0	0	0	0	0	0	0	0	0	0	0	0	0	0	0	0	0	0	0	0	0	0	0	0	0	0	0	0	0	0	0	0	1.48723e-08
K06118	UDP-sulfoquinovose synthase [EC:3.13.1.1]	UDP-sulfoquinovose synthase [EC:3.13.1.1]	UDP-sulfoquinovose synthase	EC:3.13.1.1	Metabolism; Carbohydrate Metabolism; Amino sugar and nucleotide sugar metabolism|Metabolism; Lipid Metabolism; Glycerolipid metabolism	Metabolism	Carbohydrate Metabolism	Amino sugar and nucleotide sugar metabolism	0	0	0	0	0	0	0	0	0	0	0	0	0	0	2.1035e-08	0	0	0	0	0	0	0	1.41466e-08	0	0	0	0	0	0	9.60589e-09	0	0	0	0	1.37165e-08	0	0	1.00284e-08	0	0	0
K11632	bacitracin transport system permease protein	bacitracin transport system permease protein	bacitracin transport system permease protein	0	Human Diseases; Infectious Diseases; Staphylococcus aureus infection|Environmental Information Processing; Membrane Transport; ABC transporters|Environmental Information Processing; Membrane Transport; Transporters|Environmental Information Processing; Signal Transduction; Two-component system	Human Diseases	Infectious Diseases	Staphylococcus aureus infection	0	0	2.07403e-08	0	0	0	0	0	0	0	0	0	0	0	0	0	8.50386e-09	0	0	0	0	0	0	0	0	0	0	0	0	9.60589e-09	0	0	0	0	0	0	0	0	0	0	0
K11630	two-component system, OmpR family, bacitracin resistance response regulator BceR	two-component system, OmpR family, bacitracin resistance response regulator BceR	two-component system, OmpR family, bacitracin resistance response regulator BceR	0	Environmental Information Processing; Signal Transduction; Two-component system	Environmental Information Processing	Signal Transduction	Two-component system	0	0	2.07403e-08	0	0	0	0	0	0	0	0	0	0	0	0	0	8.50386e-09	0	0	0	0	0	0	0	0	0	0	0	0	1.92118e-08	0	0	0	0	0	0	0	0	0	0	0
K11631	bacitracin transport system ATP-binding protein	bacitracin transport system ATP-binding protein	bacitracin transport system ATP-binding protein	0	Human Diseases; Infectious Diseases; Staphylococcus aureus infection|Environmental Information Processing; Membrane Transport; ABC transporters|Environmental Information Processing; Membrane Transport; Transporters|Environmental Information Processing; Signal Transduction; Two-component system	Human Diseases	Infectious Diseases	Staphylococcus aureus infection	0	0	2.07403e-08	0	0	0	0	0	0	0	0	0	0	0	0	0	8.50386e-09	0	0	0	0	0	0	0	0	0	0	0	0	9.60589e-09	0	0	0	0	0	0	0	0	0	0	0
K09814	hemin transport system ATP-binding protein [EC:3.6.3.-]	hemin transport system ATP-binding protein [EC:3.6.3.-]	hemin transport system ATP-binding protein	EC:3.6.3.-	Environmental Information Processing; Membrane Transport; ABC transporters|Environmental Information Processing; Membrane Transport; Transporters	Environmental Information Processing	Membrane Transport	ABC transporters	0	0	2.07403e-08	0	0	0	0	0	0	0	0	0	0	0	0	0	8.50386e-09	0	0	0	0	0	0	0	0	0	0	0	0	1.92118e-08	0	0	0	0	0	0	0	0	0	0	0
K09813	hemin transport system permease protein	hemin transport system permease protein	hemin transport system permease protein	0	Environmental Information Processing; Membrane Transport; ABC transporters|Environmental Information Processing; Membrane Transport; Transporters	Environmental Information Processing	Membrane Transport	ABC transporters	0	0	2.07403e-08	0	0	0	0	0	0	0	0	0	0	0	0	0	8.50386e-09	0	0	0	0	0	0	0	0	0	0	0	0	1.92118e-08	0	0	0	0	0	0	0	0	0	0	0
K01249	DNA glycosylase [EC:3.2.2.-]	DNA glycosylase [EC:3.2.2.-]	DNA glycosylase	EC:3.2.2.-	Unclassified; Genetic Information Processing; Replication, recombination and repair proteins	Unclassified	Genetic Information Processing	Replication, recombination and repair proteins	0	0	0	0	0	0	0	0	0	0	0	0	0	0	1.05175e-08	0	0	0	0	0	1.18371e-08	0	0	0	0	0	0	0	7.24216e-09	0	8.86264e-09	6.00113e-09	0	0	0	0	0	0	0	0	2.97445e-08
K00220	cyclohexadienyl dehydrogenase [EC:1.3.1.43]; cyclohexadieny/prephenate dehydrogenase [EC:1.3.1.43 1.3.1.12]	cyclohexadienyl dehydrogenase [EC:1.3.1.43]; cyclohexadieny/prephenate dehydrogenase [EC:1.3.1.43 1.3.1.12]	cyclohexadienyl dehydrogenase	EC:1.3.1.43	Metabolism; Amino Acid Metabolism; Phenylalanine, tyrosine and tryptophan biosynthesis|Metabolism; Biosynthesis of Other Secondary Metabolites; Novobiocin biosynthesis	Metabolism	Amino Acid Metabolism	Phenylalanine, tyrosine and tryptophan biosynthesis	0	0	0	0	0	0	0	0	0	0	0	0	0	0	0	0	8.50386e-09	0	0	0	0	1.78886e-08	1.41466e-08	0	0	0	0	0	0	0	1.77253e-08	6.00113e-09	0	0	0	0	0	0	0	2.35782e-08	2.97445e-08
K12538	outer membrane protein HasF	outer membrane protein HasF	outer membrane protein HasF	0	Environmental Information Processing; Membrane Transport; Secretion system	Environmental Information Processing	Membrane Transport	Secretion system	0	0	0	0	0	0	0	0	0	0	0	0	0	0	0	0	0	0	0	0	0	1.78886e-08	0	0	0	0	0	1.55635e-08	0	1.92118e-08	0	0	0	0	0	0	0	0	0	0	1.48723e-08
K12536	ATP-binding cassette, subfamily C, bacterial HasD	ATP-binding cassette, subfamily C, bacterial HasD	ATP-binding cassette, subfamily C, bacterial HasD	0	Environmental Information Processing; Membrane Transport; Secretion system	Environmental Information Processing	Membrane Transport	Secretion system	0	0	0	0	0	0	0	0	0	0	0	0	1.09115e-08	0	1.05175e-08	0	0	0	0	0	0	1.78886e-08	0	0	0	0	0	0	0	0	0	0	0	0	1.37165e-08	0	0	0	0	0	1.48723e-08
K12537	protease secretion protein HasE	protease secretion protein HasE	protease secretion protein HasE	0	Environmental Information Processing; Membrane Transport; Secretion system	Environmental Information Processing	Membrane Transport	Secretion system	0	0	0	0	0	0	0	0	0	0	0	0	0	0	0	0	0	0	0	0	0	1.78886e-08	0	0	0	0	0	0	0	0	0	0	0	0	0	0	0	0	0	0	1.48723e-08
K10975	allantoin permease	allantoin permease	allantoin permease	0	Unclassified; Cellular Processes and Signaling; Other ion-coupled transporters	Unclassified	Cellular Processes and Signaling	Other ion-coupled transporters	0	0	0	0	0	0	0	0	0	0	0	0	0	0	5.25875e-08	0	0	1.28672e-08	1.11979e-08	1.14942e-08	1.18371e-08	1.78886e-08	0	0	1.49586e-08	9.69181e-09	0	0	1.44843e-08	9.60589e-09	8.86264e-09	6.00113e-09	0	0	0	0	1.64863e-08	0	0	0	2.97445e-08
K00315	dimethylglycine dehydrogenase [EC:1.5.99.2]	dimethylglycine dehydrogenase [EC:1.5.99.2]	dimethylglycine dehydrogenase	EC:1.5.99.2	Metabolism; Amino Acid Metabolism; Glycine, serine and threonine metabolism	Metabolism	Amino Acid Metabolism	Glycine, serine and threonine metabolism	0	0	0	0	0	0	0	0	0	0	0	0	0	0	0	0	0	0	0	0	0	0	0	0	0	0	0	0	0	0	1.77253e-08	0	0	0	0	0	0	0	0	1.17891e-08	2.97445e-08
K09860	hypothetical protein	hypothetical protein	hypothetical protein	0	Unclassified; Poorly Characterized; Function unknown	Unclassified	Poorly Characterized	Function unknown	0	0	0	0	0	0	0	0	0	0	0	0	0	0	1.2621e-07	0	1.70077e-08	0	6.71874e-08	5.7471e-08	0	1.07331e-07	0	4.54771e-07	4.78677e-07	5.23358e-07	1.45258e-06	3.26834e-07	0	0	0	0	0	0	0	0	0	0	0	0	0
K10020	octopine/nopaline transport system permease protein	octopine/nopaline transport system permease protein	octopine/nopaline transport system permease protein	0	Environmental Information Processing; Membrane Transport; ABC transporters|Environmental Information Processing; Membrane Transport; Transporters	Environmental Information Processing	Membrane Transport	ABC transporters	0	0	0	0	0	0	0	0	0	0	0	0	0	0	0	0	0	0	0	0	0	0	0	0	0	0	0	0	0	0	8.86264e-09	0	0	0	0	0	0	0	0	0	1.48723e-08
K10022	arginine/ornithine transport system substrate-binding protein	arginine/ornithine transport system substrate-binding protein	arginine/ornithine transport system substrate-binding protein	0	Environmental Information Processing; Membrane Transport; ABC transporters|Environmental Information Processing; Membrane Transport; Transporters	Environmental Information Processing	Membrane Transport	ABC transporters	0	0	0	0	0	0	0	0	1.58588e-08	0	0	0	0	0	0	0	0	0	0	0	0	1.78886e-08	0	0	0	9.69181e-09	0	0	0	0	0	0	0	0	0	0	1.64863e-08	0	0	0	1.48723e-08
K10023	arginine/ornithine transport system permease protein	arginine/ornithine transport system permease protein	arginine/ornithine transport system permease protein	0	Environmental Information Processing; Membrane Transport; ABC transporters|Environmental Information Processing; Membrane Transport; Transporters	Environmental Information Processing	Membrane Transport	ABC transporters	0	0	0	0	0	0	0	0	0	0	0	0	0	0	0	0	0	0	0	0	0	1.78886e-08	0	0	0	0	0	0	0	0	0	0	0	0	0	0	0	0	0	0	1.48723e-08
K10024	arginine/ornithine transport system permease protein	arginine/ornithine transport system permease protein	arginine/ornithine transport system permease protein	0	Environmental Information Processing; Membrane Transport; ABC transporters|Environmental Information Processing; Membrane Transport; Transporters	Environmental Information Processing	Membrane Transport	ABC transporters	0	0	0	0	0	0	0	0	0	0	0	0	0	0	0	0	0	0	0	0	0	0	0	0	0	0	0	0	0	0	0	0	0	0	0	0	0	0	0	0	1.48723e-08
K10025	arginine/ornithine transport system ATP-binding protein [EC:3.6.3.-]	arginine/ornithine transport system ATP-binding protein [EC:3.6.3.-]	arginine/ornithine transport system ATP-binding protein	EC:3.6.3.-	Environmental Information Processing; Membrane Transport; ABC transporters|Environmental Information Processing; Membrane Transport; Transporters	Environmental Information Processing	Membrane Transport	ABC transporters	0	0	0	0	0	0	0	0	0	0	0	0	0	0	0	0	0	0	0	0	0	0	0	0	0	0	0	0	0	0	0	0	0	0	0	0	0	0	0	0	1.48723e-08
K01477	allantoicase [EC:3.5.3.4]	allantoicase [EC:3.5.3.4]	allantoicase	EC:3.5.3.4	Metabolism; Nucleotide Metabolism; Purine metabolism	Metabolism	Nucleotide Metabolism	Purine metabolism	0	0	0	0	0	0	0	0	0	0	0	0	0	0	0	0	0	0	0	0	0	0	0	0	0	0	0	0	0	0	0	0	0	0	0	0	0	0	0	0	1.48723e-08
K03302	anaerobic C4-dicarboxylate transporter, Dcu family	anaerobic C4-dicarboxylate transporter, Dcu family	anaerobic C4-dicarboxylate transporter, Dcu family	0	Unclassified; Cellular Processes and Signaling; Other ion-coupled transporters	Unclassified	Cellular Processes and Signaling	Other ion-coupled transporters	0	0	2.07403e-08	0	0	0	0	0	0	0	0	0	0	0	0	0	8.50386e-09	0	0	0	0	0	0	0	0	0	0	0	0	9.60589e-09	0	0	0	0	0	0	0	0	0	0	0
K10565	chemotaxis protein MotD	chemotaxis protein MotD	chemotaxis protein MotD	0	Cellular Processes; Cell Motility; Flagellar assembly	Cellular Processes	Cell Motility	Flagellar assembly	0	0	0	0	0	0	0	0	0	0	0	0	0	0	0	0	0	0	0	0	0	0	0	0	0	0	0	0	0	0	8.86264e-09	0	0	0	0	0	0	0	0	0	2.97445e-08
K10564	chemotaxis protein MotC	chemotaxis protein MotC	chemotaxis protein MotC	0	Cellular Processes; Cell Motility; Flagellar assembly	Cellular Processes	Cell Motility	Flagellar assembly	0	0	0	0	0	0	0	0	0	0	0	0	0	0	0	0	0	0	0	0	0	0	0	0	0	0	0	0	0	0	8.86264e-09	0	0	0	0	0	0	0	0	0	1.48723e-08
K07228	TrkA domain protein	TrkA domain protein	TrkA domain protein	0	Unclassified; Cellular Processes and Signaling; Inorganic ion transport and metabolism	Unclassified	Cellular Processes and Signaling	Inorganic ion transport and metabolism	0	0	0	0	0	0	0	0	0	0	0	0	0	2.33996e-08	0	0	0	0	0	0	0	0	0	0	0	0	0	0	0	0	0	0	0	0	0	0	0	1.00284e-08	0	1.17891e-08	1.48723e-08
K00028	malate dehydrogenase (decarboxylating) [EC:1.1.1.39]	malate dehydrogenase (decarboxylating) [EC:1.1.1.39]	malate dehydrogenase (decarboxylating)	EC:1.1.1.39	Metabolism; Energy Metabolism; Carbon fixation in photosynthetic organisms|Metabolism; Carbohydrate Metabolism; Pyruvate metabolism	Metabolism	Energy Metabolism	Carbon fixation in photosynthetic organisms	0	0	0	0	0	0	0	0	0	0	0	0	0	0	4.207e-08	0	0	1.28672e-08	1.11979e-08	1.14942e-08	0	0	0	0	1.49586e-08	0	0	0	7.24216e-09	9.60589e-09	8.86264e-09	0	0	0	0	0	1.64863e-08	0	0	1.17891e-08	1.48723e-08
K12552	penicillin-binding protein 1 [EC:3.4.-.-]	penicillin-binding protein 1 [EC:3.4.-.-]	penicillin-binding protein 1	EC:3.4.-.-	Metabolism; Glycan Biosynthesis and Metabolism; Peptidoglycan biosynthesis	Metabolism	Glycan Biosynthesis and Metabolism	Peptidoglycan biosynthesis	0	0	2.07403e-08	0	0	0	0	0	0	0	0	0	0	0	0	0	8.50386e-09	0	0	0	0	0	0	0	0	0	0	0	0	1.92118e-08	0	0	0	0	0	0	0	0	0	0	0
K12553	penicillin-binding protein 3 [EC:3.4.-.-]	penicillin-binding protein 3 [EC:3.4.-.-]	penicillin-binding protein 3	EC:3.4.-.-	Metabolism; Glycan Biosynthesis and Metabolism; Peptidoglycan biosynthesis	Metabolism	Glycan Biosynthesis and Metabolism	Peptidoglycan biosynthesis	0	0	2.07403e-08	0	0	0	0	0	0	0	0	0	0	0	0	0	8.50386e-09	0	0	0	0	0	0	0	0	0	0	0	0	1.92118e-08	0	0	0	0	0	0	0	0	0	0	0
K12551	transglycosylase [EC:2.4.1.-]	transglycosylase [EC:2.4.1.-]	transglycosylase	EC:2.4.1.-	Metabolism; Glycan Biosynthesis and Metabolism; Glycosyltransferases|Metabolism; Glycan Biosynthesis and Metabolism; Peptidoglycan biosynthesis	Metabolism	Glycan Biosynthesis and Metabolism	Glycosyltransferases	0	0	2.07403e-08	0	0	0	0	0	0	0	0	0	0	0	0	0	8.50386e-09	0	0	0	0	0	0	0	0	0	0	0	0	1.92118e-08	0	0	0	0	0	0	0	0	0	0	0
K10954	zona occludens toxin	zona occludens toxin	zona occludens toxin	0	Human Diseases; Infectious Diseases; Vibrio cholerae infection|Environmental Information Processing; Signaling Molecules and Interaction; Bacterial toxins	Human Diseases	Infectious Diseases	Vibrio cholerae infection	1.27503e-08	0	0	0	0	0	0	0	0	0	0	0	1.09115e-08	4.67992e-08	0	0	8.50386e-09	2.57344e-08	0	0	0	0	0	0	0	0	0	0	0	0	0	0	0	0	0	0	0	1.00284e-08	1.15533e-08	2.35782e-08	2.97445e-08
K00499	choline monooxygenase [EC:1.14.15.7]	choline monooxygenase [EC:1.14.15.7]	choline monooxygenase	EC:1.14.15.7	Metabolism; Amino Acid Metabolism; Glycine, serine and threonine metabolism	Metabolism	Amino Acid Metabolism	Glycine, serine and threonine metabolism	1.27503e-08	0	0	0	0	0	0	0	0	0	0	0	1.09115e-08	4.67992e-08	0	0	8.50386e-09	2.57344e-08	0	0	0	0	0	0	0	0	0	0	0	0	0	0	0	0	0	0	0	1.00284e-08	1.15533e-08	2.35782e-08	2.97445e-08
K00496	alkane 1-monooxygenase [EC:1.14.15.3]	alkane 1-monooxygenase [EC:1.14.15.3]	alkane 1-monooxygenase	EC:1.14.15.3	Metabolism; Lipid Metabolism; Fatty acid metabolism	Metabolism	Lipid Metabolism	Fatty acid metabolism	0	0	0	0	0	0	0	0	0	0	0	0	0	2.33996e-08	0	0	0	0	0	0	0	0	0	0	0	0	0	0	0	0	0	0	0	0	0	0	0	0	0	0	0
K00491	nitric-oxide synthase, bacterial [EC:1.14.13.39]	nitric-oxide synthase, bacterial [EC:1.14.13.39]	nitric-oxide synthase, bacterial	EC:1.14.13.39	Metabolism; Amino Acid Metabolism; Arginine and proline metabolism	Metabolism	Amino Acid Metabolism	Arginine and proline metabolism	0	0	2.07403e-08	0	0	0	0	0	0	0	0	0	0	0	0	0	8.50386e-09	0	0	0	0	0	0	0	0	0	0	0	0	1.92118e-08	0	0	0	0	0	0	0	0	0	0	0
K00493	unspecific monooxygenase [EC:1.14.14.1]	unspecific monooxygenase [EC:1.14.14.1]	unspecific monooxygenase	EC:1.14.14.1	Metabolism; Xenobiotics Biodegradation and Metabolism; Aminobenzoate degradation|Metabolism; Amino Acid Metabolism; Tryptophan metabolism|Metabolism; Lipid Metabolism; Fatty acid metabolism	Metabolism	Xenobiotics Biodegradation and Metabolism	Aminobenzoate degradation	1.27503e-08	0	0	0	0	0	0	0	0	0	0	0	1.09115e-08	4.67992e-08	0	0	1.70077e-08	2.57344e-08	0	0	0	0	0	0	0	0	0	0	0	0	8.86264e-09	0	0	0	0	0	0	1.00284e-08	1.15533e-08	3.53673e-08	4.46168e-08
K07055	; tRNA wybutosine-synthesizing protein 2 [EC:2.1.1.-]	; tRNA wybutosine-synthesizing protein 2 [EC:2.1.1.-]	; tRNA wybutosine-synthesizing protein 2	EC:2.1.1.-	Unclassified; Poorly Characterized; General function prediction only	Unclassified	Poorly Characterized	General function prediction only	0	0	0	0	0	0	2.32067e-08	2.15452e-08	0	0	0	0	0	0	0	0	0	0	0	0	0	0	2.82933e-08	0	0	0	0	0	0	9.60589e-09	0	1.20023e-08	0	0	0	0	1.64863e-08	0	0	0	2.97445e-08
K07059	None	None	None	0	Unclassified; Poorly Characterized; General function prediction only	Unclassified	Poorly Characterized	General function prediction only	0	0	0	0	0	0	0	0	0	0	0	0	0	0	0	0	0	0	0	0	0	0	0	0	0	0	0	0	0	0	0	0	0	0	0	0	0	0	0	0	0
K01454	None	None	None	0	Unclassified; Metabolism; Others	Unclassified	Metabolism	Others	0	0	0	0	0	0	0	0	0	0	0	0	0	0	0	0	0	0	0	0	0	0	0	0	0	0	0	0	0	0	8.86264e-09	0	0	0	0	0	0	0	0	0	1.48723e-08
K04756	alkyl hydroperoxide reductase subunit D	alkyl hydroperoxide reductase subunit D	alkyl hydroperoxide reductase subunit D	0	Unclassified; Poorly Characterized; Function unknown	Unclassified	Poorly Characterized	Function unknown	0	1.68604e-08	0	1.17334e-08	0	0	0	0	0	0	0	1.94043e-08	0	0	3.15525e-08	0	1.70077e-08	1.28672e-08	0	1.14942e-08	0	1.78886e-08	1.41466e-08	1.5159e-08	1.49586e-08	9.69181e-09	0	7.78177e-09	0	1.92118e-08	0	0	0	0	1.37165e-08	0	0	1.00284e-08	1.15533e-08	1.17891e-08	0
K10810	transcriptional regulator TenI	transcriptional regulator TenI	transcriptional regulator TenI	0	Genetic Information Processing; Transcription; Transcription factors	Genetic Information Processing	Transcription	Transcription factors	0	0	2.07403e-08	0	0	0	0	0	0	0	0	0	0	0	0	0	8.50386e-09	0	0	0	0	0	0	0	0	0	0	0	0	1.92118e-08	0	0	0	0	0	0	0	0	0	0	0
K10725	archaeal cell division control protein 6	archaeal cell division control protein 6	archaeal cell division control protein 6	0	Genetic Information Processing; Replication and Repair; DNA replication proteins	Genetic Information Processing	Replication and Repair	DNA replication proteins	0	0	0	0	0	0	2.32067e-08	2.15452e-08	0	0	0	0	0	0	0	0	0	0	0	0	0	0	2.82933e-08	0	0	0	0	0	0	9.60589e-09	0	1.20023e-08	0	0	0	0	1.64863e-08	0	0	0	2.97445e-08
K08295	2-aminobenzoate-CoA ligase [EC:6.2.1.32]	2-aminobenzoate-CoA ligase [EC:6.2.1.32]	2-aminobenzoate-CoA ligase	EC:6.2.1.32	Metabolism; Xenobiotics Biodegradation and Metabolism; Aminobenzoate degradation	Metabolism	Xenobiotics Biodegradation and Metabolism	Aminobenzoate degradation	1.27503e-08	0	0	0	0	0	0	0	0	0	0	0	1.09115e-08	4.67992e-08	0	0	1.70077e-08	2.57344e-08	0	0	0	1.78886e-08	0	0	1.49586e-08	0	0	7.78177e-09	0	9.60589e-09	8.86264e-09	0	0	0	0	0	0	1.00284e-08	1.15533e-08	2.35782e-08	4.46168e-08
K14584	2-hydroxychromene-2-carboxylate isomerase [EC:5.99.1.4]	2-hydroxychromene-2-carboxylate isomerase [EC:5.99.1.4]	2-hydroxychromene-2-carboxylate isomerase	EC:5.99.1.4	Metabolism; Xenobiotics Biodegradation and Metabolism; Naphthalene degradation	Metabolism	Xenobiotics Biodegradation and Metabolism	Naphthalene degradation	1.27503e-08	0	0	0	0	0	0	0	0	0	0	0	1.09115e-08	4.67992e-08	0	0	8.50386e-09	2.57344e-08	0	0	0	0	0	0	0	0	0	0	0	0	0	0	0	0	0	0	0	1.00284e-08	1.15533e-08	2.35782e-08	2.97445e-08
K09190	hypothetical protein	hypothetical protein	hypothetical protein	0	Unclassified; Poorly Characterized; Function unknown	Unclassified	Poorly Characterized	Function unknown	0	0	0	0	1.05707e-08	0	0	0	0	0	0	0	0	2.33996e-08	0	0	8.50386e-09	0	0	0	0	0	0	0	0	0	0	0	0	0	0	0	0	0	1.37165e-08	0	0	0	1.15533e-08	1.17891e-08	1.48723e-08
K14749	ethylbenzene dioxygenase beta subunit [EC:1.14.12.-]	ethylbenzene dioxygenase beta subunit [EC:1.14.12.-]	ethylbenzene dioxygenase beta subunit	EC:1.14.12.-	None	None	0	0	1.27503e-08	0	0	0	0	0	0	0	0	0	0	0	1.09115e-08	4.67992e-08	0	0	8.50386e-09	2.57344e-08	0	0	0	0	0	0	0	0	0	0	0	0	0	0	0	0	0	0	0	1.00284e-08	1.15533e-08	2.35782e-08	2.97445e-08
K14743	membrane-anchored mycosin MYCP [EC:3.4.21.-]	membrane-anchored mycosin MYCP [EC:3.4.21.-]	membrane-anchored mycosin MYCP	EC:3.4.21.-	None	None	0	0	0	0	0	0	0	0	0	0	0	0	0	1.94043e-08	0	0	1.05175e-08	0	0	1.28672e-08	0	0	0	0	0	1.5159e-08	0	0	0	7.78177e-09	0	0	0	0	0	0	0	0	0	0	0	0	0
K02164	nitric-oxide reductase NorE protein [EC:1.7.99.7]; nitric oxide reductase NorE protein	nitric-oxide reductase NorE protein [EC:1.7.99.7]; nitric oxide reductase NorE protein	nitric-oxide reductase NorE protein	EC:1.7.99.7	Metabolism; Energy Metabolism; Nitrogen metabolism	Metabolism	Energy Metabolism	Nitrogen metabolism	0	0	0	0	0	0	0	0	0	0	0	0	0	0	0	0	0	0	0	0	0	0	0	0	0	0	0	0	0	0	8.86264e-09	0	0	0	0	0	0	0	0	0	1.48723e-08
K07268	opacity associated protein	opacity associated protein	opacity associated protein	0	Unclassified; Cellular Processes and Signaling; Membrane and intracellular structural molecules	Unclassified	Cellular Processes and Signaling	Membrane and intracellular structural molecules	0	0	0	0	0	0	0	0	0	0	0	0	1.09115e-08	0	0	0	0	1.28672e-08	0	0	0	0	0	0	0	0	0	0	0	0	0	0	0	0	0	0	0	0	0	0	1.48723e-08
K04478	monofunctional glycosyltransferase [EC:2.4.1.-]	monofunctional glycosyltransferase [EC:2.4.1.-]	monofunctional glycosyltransferase	EC:2.4.1.-	Metabolism; Glycan Biosynthesis and Metabolism; Glycosyltransferases|Metabolism; Glycan Biosynthesis and Metabolism; Peptidoglycan biosynthesis	Metabolism	Glycan Biosynthesis and Metabolism	Glycosyltransferases	0	0	2.07403e-08	0	0	0	0	0	0	0	0	0	0	0	0	0	8.50386e-09	0	0	0	0	0	0	0	0	0	0	0	0	1.92118e-08	0	0	0	0	0	0	0	0	0	0	0
K08261	D-sorbitol dehydrogenase (acceptor) [EC:1.1.99.21]	D-sorbitol dehydrogenase (acceptor) [EC:1.1.99.21]	D-sorbitol dehydrogenase (acceptor)	EC:1.1.99.21	Metabolism; Carbohydrate Metabolism; Fructose and mannose metabolism	Metabolism	Carbohydrate Metabolism	Fructose and mannose metabolism	0	0	0	0	0	0	0	0	0	0	0	0	0	0	0	0	0	0	0	0	0	0	0	0	0	0	0	0	0	0	8.86264e-09	0	0	0	0	0	0	0	1.15533e-08	0	1.48723e-08
K02572	ferredoxin-type protein NapF	ferredoxin-type protein NapF	ferredoxin-type protein NapF	0	Metabolism; Energy Metabolism; Nitrogen metabolism	Metabolism	Energy Metabolism	Nitrogen metabolism	0	0	0	0	1.05707e-08	0	0	0	0	0	0	0	1.09115e-08	2.33996e-08	0	0	1.70077e-08	1.28672e-08	0	0	0	0	0	0	0	0	0	0	7.24216e-09	0	0	0	0	0	1.37165e-08	0	0	0	1.15533e-08	1.17891e-08	1.48723e-08
K01143	exodeoxyribonuclease (lambda-induced) [EC:3.1.11.3]	exodeoxyribonuclease (lambda-induced) [EC:3.1.11.3]	exodeoxyribonuclease (lambda-induced)	EC:3.1.11.3	Unclassified; Genetic Information Processing; Replication, recombination and repair proteins	Unclassified	Genetic Information Processing	Replication, recombination and repair proteins	1.27503e-08	0	0	0	0	0	0	0	0	0	0	0	1.09115e-08	4.67992e-08	0	0	8.50386e-09	2.57344e-08	0	0	0	0	0	0	0	0	0	0	0	0	8.86264e-09	0	1.67492e-08	0	0	0	0	1.00284e-08	1.15533e-08	2.35782e-08	2.97445e-08
K13238	3,2-trans-enoyl-CoA isomerase, mitochondrial [EC:5.3.3.8]	3,2-trans-enoyl-CoA isomerase, mitochondrial [EC:5.3.3.8]	3,2-trans-enoyl-CoA isomerase, mitochondrial	EC:5.3.3.8	Metabolism; Lipid Metabolism; Fatty acid metabolism	Metabolism	Lipid Metabolism	Fatty acid metabolism	0	0	0	0	0	0	0	0	0	0	0	0	0	2.33996e-08	0	0	0	0	0	0	0	0	0	0	0	0	0	0	0	0	0	0	0	0	0	0	0	1.00284e-08	0	1.17891e-08	1.48723e-08
K13797	DNA-directed RNA polymerase subunit beta-beta [EC:2.7.7.6]	DNA-directed RNA polymerase subunit beta-beta' [EC:2.7.7.6]	DNA-directed RNA polymerase subunit beta-beta'	EC:2.7.7.6	Metabolism; Nucleotide Metabolism; Pyrimidine metabolism|Genetic Information Processing; Transcription; Transcription machinery|Genetic Information Processing; Replication and Repair; DNA repair and recombination proteins|Metabolism; Nucleotide Metabolism; Purine metabolism|Genetic Information Processing; Transcription; RNA polymerase	Metabolism	Nucleotide Metabolism	Pyrimidine metabolism	0	0	0	0	0	0	0	0	0	0	0	0	0	0	1.2621e-07	0	1.70077e-08	0	6.71874e-08	5.7471e-08	0	1.07331e-07	0	4.54771e-07	4.78677e-07	5.23358e-07	1.45258e-06	3.26834e-07	0	0	0	0	0	0	0	0	0	0	0	0	0
K09944	hypothetical protein	hypothetical protein	hypothetical protein	0	Unclassified; Poorly Characterized; Function unknown	Unclassified	Poorly Characterized	Function unknown	0	0	0	0	0	0	0	0	0	0	0	0	0	0	1.2621e-07	0	1.70077e-08	0	6.71874e-08	5.7471e-08	0	1.07331e-07	0	4.54771e-07	4.78677e-07	5.23358e-07	1.45258e-06	3.26834e-07	0	0	0	0	0	0	0	0	0	0	0	0	0
K09947	hypothetical protein	hypothetical protein	hypothetical protein	0	Unclassified; Poorly Characterized; Function unknown	Unclassified	Poorly Characterized	Function unknown	1.27503e-08	0	0	0	0	0	0	0	0	0	0	0	1.09115e-08	4.67992e-08	0	0	1.70077e-08	2.57344e-08	0	0	0	1.78886e-08	0	0	1.49586e-08	9.69181e-09	0	7.78177e-09	0	9.60589e-09	1.77253e-08	0	0	0	0	0	1.64863e-08	1.00284e-08	1.15533e-08	2.35782e-08	5.9489e-08
K10851	nitrogen regulatory protein A	nitrogen regulatory protein A	nitrogen regulatory protein A	0	Environmental Information Processing; Signal Transduction; Two-component system	Environmental Information Processing	Signal Transduction	Two-component system	0	0	2.07403e-08	0	0	0	0	0	0	0	0	0	0	0	0	0	8.50386e-09	0	0	0	0	0	0	0	0	0	0	0	0	1.92118e-08	0	0	0	0	0	0	0	0	0	0	0
K10850	MFS transporter, NNP family, putative nitrate transporter	MFS transporter, NNP family, putative nitrate transporter	MFS transporter, NNP family, putative nitrate transporter	0	Environmental Information Processing; Membrane Transport; Transporters|Environmental Information Processing; Signal Transduction; Two-component system	Environmental Information Processing	Membrane Transport	Transporters	0	0	2.07403e-08	0	0	0	0	0	0	0	0	0	0	0	0	0	8.50386e-09	0	0	0	0	0	0	0	0	0	0	0	0	1.92118e-08	0	0	0	0	0	0	0	0	0	0	0
K14974	6-hydroxynicotinate 3-monooxygenase [EC:1.14.13.114]	6-hydroxynicotinate 3-monooxygenase [EC:1.14.13.114]	6-hydroxynicotinate 3-monooxygenase	EC:1.14.13.114	None	None	0	0	1.27503e-08	0	0	0	0	0	0	0	0	0	0	0	1.09115e-08	4.67992e-08	0	0	1.70077e-08	2.57344e-08	0	0	0	1.78886e-08	0	0	1.49586e-08	0	0	7.78177e-09	0	9.60589e-09	0	0	0	0	0	0	0	1.00284e-08	1.15533e-08	2.35782e-08	2.97445e-08
K00590	site-specific DNA-methyltransferase (cytosine-N4-specific) [EC:2.1.1.113]	site-specific DNA-methyltransferase (cytosine-N4-specific) [EC:2.1.1.113]	site-specific DNA-methyltransferase (cytosine-N4-specific)	EC:2.1.1.113	Unclassified; Genetic Information Processing; Replication, recombination and repair proteins	Unclassified	Genetic Information Processing	Replication, recombination and repair proteins	1.27503e-08	0	0	2.34669e-08	0	1.08042e-08	1.16033e-08	1.07726e-08	1.58588e-08	5.5264e-08	0	0	1.09115e-08	0	0	0	0	1.28672e-08	0	3.44826e-08	0	0	0	0	0	9.69181e-09	1.91129e-08	0	7.24216e-09	0	1.77253e-08	0	0	0	0	0	0	1.00284e-08	1.0398e-07	8.25237e-08	0
K07653	two-component system, OmpR family, sensor histidine kinase MprB [EC:2.7.13.3]	two-component system, OmpR family, sensor histidine kinase MprB [EC:2.7.13.3]	two-component system, OmpR family, sensor histidine kinase MprB	EC:2.7.13.3	Metabolism; Enzyme Families; Protein kinases|Environmental Information Processing; Signal Transduction; Two-component system	Metabolism	Enzyme Families	Protein kinases	0	1.68604e-08	0	0	0	0	0	0	0	0	0	1.94043e-08	0	0	3.15525e-08	0	0	1.28672e-08	0	0	0	0	1.41466e-08	1.5159e-08	0	0	0	7.78177e-09	0	0	0	0	0	0	0	0	0	1.00284e-08	0	0	0
K00561	23S rRNA (adenine2085-N6)-dimethyltransferase [EC:2.1.1.184]; rRNA (adenine-N6-)-methyltransferase [EC:2.1.1.48]	23S rRNA (adenine2085-N6)-dimethyltransferase [EC:2.1.1.184]; rRNA (adenine-N6-)-methyltransferase [EC:2.1.1.48]	23S rRNA (adenine2085-N6)-dimethyltransferase	EC:2.1.1.184	Unclassified; Genetic Information Processing; Translation proteins	Unclassified	Genetic Information Processing	Translation proteins	0	0	0	0	0	0	1.16033e-08	0	0	0	0	0	0	0	4.207e-08	0	8.50386e-09	1.28672e-08	1.11979e-08	1.14942e-08	0	0	1.41466e-08	1.5159e-08	1.49586e-08	9.69181e-09	0	0	7.24216e-09	2.88177e-08	0	0	0	0	0	0	1.64863e-08	0	1.15533e-08	0	0
K01167	ribonuclease T1 [EC:3.1.27.3]	ribonuclease T1 [EC:3.1.27.3]	ribonuclease T1	EC:3.1.27.3	Unclassified; Genetic Information Processing; Translation proteins	Unclassified	Genetic Information Processing	Translation proteins	1.27503e-08	0	0	0	0	0	0	0	0	0	0	0	1.09115e-08	4.67992e-08	0	0	8.50386e-09	2.57344e-08	0	0	0	0	0	0	0	0	0	7.78177e-09	0	0	0	0	0	0	0	0	0	1.00284e-08	1.15533e-08	2.35782e-08	2.97445e-08
K12255	guanidinobutyrase [EC:3.5.3.7]	guanidinobutyrase [EC:3.5.3.7]	guanidinobutyrase	EC:3.5.3.7	Metabolism; Amino Acid Metabolism; Arginine and proline metabolism	Metabolism	Amino Acid Metabolism	Arginine and proline metabolism	0	0	0	0	0	0	0	0	0	0	0	0	0	0	0	0	0	0	0	0	0	0	0	0	0	0	0	0	0	0	0	0	0	0	0	0	0	0	0	0	1.48723e-08
K12254	4-guanidinobutyraldehyde dehydrogenase / NAD-dependent aldehyde dehydrogenase [EC:1.2.1.54 1.2.1.-]	4-guanidinobutyraldehyde dehydrogenase / NAD-dependent aldehyde dehydrogenase [EC:1.2.1.54 1.2.1.-]	4-guanidinobutyraldehyde dehydrogenase / NAD-dependent aldehyde dehydrogenase	EC:1.2.1.54	Metabolism; Amino Acid Metabolism; Arginine and proline metabolism	Metabolism	Amino Acid Metabolism	Arginine and proline metabolism	0	0	0	0	0	0	0	0	1.58588e-08	0	0	0	0	0	0	0	0	0	0	0	0	1.78886e-08	0	0	0	9.69181e-09	0	0	0	0	0	0	0	0	0	0	1.64863e-08	0	0	0	1.48723e-08
K12252	arginine:pyruvate transaminase [EC:2.6.1.84]	arginine:pyruvate transaminase [EC:2.6.1.84]	arginine:pyruvate transaminase	EC:2.6.1.84	Metabolism; Amino Acid Metabolism; Amino acid related enzymes|Metabolism; Amino Acid Metabolism; Arginine and proline metabolism	Metabolism	Amino Acid Metabolism	Amino acid related enzymes	0	0	0	0	0	0	0	0	0	0	0	0	0	0	0	0	0	0	0	0	0	0	0	0	0	0	0	0	0	0	8.86264e-09	0	0	0	0	0	0	0	0	1.17891e-08	2.97445e-08
K12070	conjugal transfer pilus assembly protein TraI	conjugal transfer pilus assembly protein TraI	conjugal transfer pilus assembly protein TraI	0	Environmental Information Processing; Membrane Transport; Secretion system	Environmental Information Processing	Membrane Transport	Secretion system	1.27503e-08	0	0	0	0	0	0	0	0	0	0	0	1.09115e-08	4.67992e-08	0	0	8.50386e-09	2.57344e-08	0	0	0	0	0	0	0	0	0	0	0	0	0	0	0	0	0	0	0	1.00284e-08	1.15533e-08	2.35782e-08	2.97445e-08
K02829	cytochrome aa3-600 menaquinol oxidase subunit IV [EC:1.10.3.12]; quinol oxidase polypeptide IV [EC:1.9.3.-]	cytochrome aa3-600 menaquinol oxidase subunit IV [EC:1.10.3.12]; quinol oxidase polypeptide IV [EC:1.9.3.-]	cytochrome aa3-600 menaquinol oxidase subunit IV	EC:1.10.3.12	Metabolism; Energy Metabolism; Oxidative phosphorylation	Metabolism	Energy Metabolism	Oxidative phosphorylation	0	0	2.07403e-08	0	0	0	0	0	0	0	0	0	0	0	0	0	8.50386e-09	0	0	0	0	0	0	0	0	0	0	0	0	1.92118e-08	0	0	0	0	0	0	0	0	0	0	0
K02827	quinol oxidase polypeptide I [EC:1.9.3.-]; cytochrome aa3-600 menaquinol oxidase subunit I [EC:1.10.3.12]	quinol oxidase polypeptide I [EC:1.9.3.-]; cytochrome aa3-600 menaquinol oxidase subunit I [EC:1.10.3.12]	quinol oxidase polypeptide I	EC:1.9.3.-	Metabolism; Energy Metabolism; Oxidative phosphorylation	Metabolism	Energy Metabolism	Oxidative phosphorylation	0	0	2.07403e-08	0	0	0	0	0	0	0	0	0	0	0	0	0	8.50386e-09	0	0	0	0	0	0	0	0	0	0	0	0	1.92118e-08	0	0	0	0	0	0	0	0	0	0	0
K02826	cytochrome aa3-600 menaquinol oxidase subunit II [EC:1.10.3.12]; quinol oxidase polypeptide II [EC:1.9.3.-]	cytochrome aa3-600 menaquinol oxidase subunit II [EC:1.10.3.12]; quinol oxidase polypeptide II [EC:1.9.3.-]	cytochrome aa3-600 menaquinol oxidase subunit II	EC:1.10.3.12	Metabolism; Energy Metabolism; Oxidative phosphorylation	Metabolism	Energy Metabolism	Oxidative phosphorylation	0	0	2.07403e-08	0	0	0	0	0	0	0	0	0	0	0	0	0	8.50386e-09	0	0	0	0	0	0	0	0	0	0	0	0	1.92118e-08	0	0	0	0	0	0	0	0	0	0	0
K01406	serralysin [EC:3.4.24.40]	serralysin [EC:3.4.24.40]	serralysin	EC:3.4.24.40	Metabolism; Enzyme Families; Peptidases	Metabolism	Enzyme Families	Peptidases	0	0	0	0	0	0	0	0	1.58588e-08	0	0	0	0	0	0	0	0	0	0	0	0	1.78886e-08	0	0	0	9.69181e-09	0	1.55635e-08	0	1.92118e-08	0	0	0	0	0	0	1.64863e-08	0	0	0	1.48723e-08
[truncated: 8 more columns]

## Sheet: Inc_Dec_Stat_Diff_PiCr_Data
This sheet contains the direction of change for the different PiCrust Measurements									1	Increase
Value of 1 means it increased in cond 2 as compared to cond 1: Age 8 vs Age 18, Age 8 vs Age 24 and Age 18 vs Age 24									-1	Decrease
KO ID	Name	KEGG_Description	Protein	EC	KEGG_Pathways	KEGG_Pathways_1	KEGG_Pathways_2	KEGG_Pathways_3	Comparison Age8 - Age 18	Comparison Age8 - Age 24	Comparison Age18 - Age 24
K05597	'glutamin-(asparagin-)ase [EC:3.5.1.38]'	glutamin-(asparagin-)ase [EC:3.5.1.38]	glutamin-(asparagin-)ase	EC:3.5.1.38	Metabolism; Amino Acid Metabolism; Arginine and proline metabolism|Metabolism; Metabolism of Other Amino Acids; D-Glutamine and D-glutamate metabolism|Metabolism; Amino Acid Metabolism; Alanine, aspartate and glutamate metabolism|Metabolism; Energy Metabolism; Nitrogen metabolism	Metabolism	Amino Acid Metabolism	Arginine and proline metabolism	1	1	1
K13017	'UDP-3-keto-D-GlcNAcA aminotransferase [EC:2.6.1.-]'	UDP-3-keto-D-GlcNAcA aminotransferase [EC:2.6.1.-]	UDP-3-keto-D-GlcNAcA aminotransferase	EC:2.6.1.-	Metabolism; Glycan Biosynthesis and Metabolism; Lipopolysaccharide biosynthesis proteins|Metabolism; Amino Acid Metabolism; Amino acid related enzymes	Metabolism	Glycan Biosynthesis and Metabolism	Lipopolysaccharide biosynthesis proteins	1	0	-1
K01828	'None'	None	None	0	Unclassified; Metabolism; Others	Unclassified	Metabolism	Others	1	0	-1
K14067	'malate-CoA ligase subunit beta [EC:6.2.1.9]'	malate-CoA ligase subunit beta [EC:6.2.1.9]	malate-CoA ligase subunit beta	EC:6.2.1.9	Metabolism; Carbohydrate Metabolism; Glyoxylate and dicarboxylate metabolism|Metabolism; Energy Metabolism; Methane metabolism	Metabolism	Carbohydrate Metabolism	Glyoxylate and dicarboxylate metabolism	0	1	1
K12428	'fatty acid CoA ligase FadD32'	fatty acid CoA ligase FadD32	fatty acid CoA ligase FadD32	0	Metabolism; Lipid Metabolism; Lipid biosynthesis proteins	Metabolism	Lipid Metabolism	Lipid biosynthesis proteins	1	0	-1
K05927	'quinone-reactive Ni/Fe-hydrogenase small subunit [EC:1.12.5.1]'	quinone-reactive Ni/Fe-hydrogenase small subunit [EC:1.12.5.1]	quinone-reactive Ni/Fe-hydrogenase small subunit	EC:1.12.5.1	Unclassified; Metabolism; Energy metabolism	Unclassified	Metabolism	Energy metabolism	1	1	1
K05922	'quinone-reactive Ni/Fe-hydrogenase large subunit [EC:1.12.5.1]'	quinone-reactive Ni/Fe-hydrogenase large subunit [EC:1.12.5.1]	quinone-reactive Ni/Fe-hydrogenase large subunit	EC:1.12.5.1	Unclassified; Metabolism; Energy metabolism	Unclassified	Metabolism	Energy metabolism	1	1	1
K01347	'IgA-specific serine endopeptidase [EC:3.4.21.72]'	IgA-specific serine endopeptidase [EC:3.4.21.72]	IgA-specific serine endopeptidase	EC:3.4.21.72	Environmental Information Processing; Membrane Transport; Secretion system|Metabolism; Enzyme Families; Peptidases	Environmental Information Processing	Membrane Transport	Secretion system	1	1	1
K04335	'minor curlin subunit'	minor curlin subunit	minor curlin subunit	0	Environmental Information Processing; Membrane Transport; Secretion system	Environmental Information Processing	Membrane Transport	Secretion system	0	1	1
K04338	'curli production assembly/transport component CsgF'	curli production assembly/transport component CsgF	curli production assembly/transport component CsgF	0	Environmental Information Processing; Membrane Transport; Secretion system	Environmental Information Processing	Membrane Transport	Secretion system	0	1	1
K13075	'N-acyl homoserine lactone hydrolase [EC:3.1.1.81]'	N-acyl homoserine lactone hydrolase [EC:3.1.1.81]	N-acyl homoserine lactone hydrolase	EC:3.1.1.81	Unclassified; Metabolism; Lipid metabolism	Unclassified	Metabolism	Lipid metabolism	0	1	1
K08692	'malate-CoA ligase subunit alpha [EC:6.2.1.9]'	malate-CoA ligase subunit alpha [EC:6.2.1.9]	malate-CoA ligase subunit alpha	EC:6.2.1.9	Metabolism; Carbohydrate Metabolism; Glyoxylate and dicarboxylate metabolism|Metabolism; Energy Metabolism; Methane metabolism	Metabolism	Carbohydrate Metabolism	Glyoxylate and dicarboxylate metabolism	0	1	1
K08693	'3''-nucleotidase [EC:3.1.3.6]'	3'-nucleotidase [EC:3.1.3.6]	3'-nucleotidase	EC:3.1.3.6	Metabolism; Nucleotide Metabolism; Pyrimidine metabolism|Metabolism; Nucleotide Metabolism; Purine metabolism	Metabolism	Nucleotide Metabolism	Pyrimidine metabolism	1	1	1
K08690	'cis-2,3-dihydrobiphenyl-2,3-diol dehydrogenase [EC:1.3.1.56]'	cis-2,3-dihydrobiphenyl-2,3-diol dehydrogenase [EC:1.3.1.56]	cis-2,3-dihydrobiphenyl-2,3-diol dehydrogenase	EC:1.3.1.56	Metabolism; Xenobiotics Biodegradation and Metabolism; Dioxin degradation	Metabolism	Xenobiotics Biodegradation and Metabolism	Dioxin degradation	1	1	1
K11740	'bacteriophage N4 adsorption protein B'	bacteriophage N4 adsorption protein B	bacteriophage N4 adsorption protein B	0	Unclassified; Poorly Characterized; General function prediction only	Unclassified	Poorly Characterized	General function prediction only	1	1	1
K09929	'hypothetical protein'	hypothetical protein	hypothetical protein	0	Unclassified; Poorly Characterized; Function unknown	Unclassified	Poorly Characterized	Function unknown	1	1	1
K00752	'hyaluronan synthase [EC:2.4.1.212]'	hyaluronan synthase [EC:2.4.1.212]	hyaluronan synthase	EC:2.4.1.212	Unclassified; Metabolism; Others	Unclassified	Metabolism	Others	-1	1	1
K01668	'tyrosine phenol-lyase [EC:4.1.99.2]'	tyrosine phenol-lyase [EC:4.1.99.2]	tyrosine phenol-lyase	EC:4.1.99.2	Metabolism; Amino Acid Metabolism; Tyrosine metabolism|Metabolism; Energy Metabolism; Nitrogen metabolism	Metabolism	Amino Acid Metabolism	Tyrosine metabolism	1	0	-1
K02319	'DNA polymerase I [EC:2.7.7.7]'	DNA polymerase I [EC:2.7.7.7]	DNA polymerase I	EC:2.7.7.7	Metabolism; Nucleotide Metabolism; Pyrimidine metabolism|Metabolism; Nucleotide Metabolism; Purine metabolism|Genetic Information Processing; Replication and Repair; DNA replication proteins	Metabolism	Nucleotide Metabolism	Pyrimidine metabolism	-1	-1	1
K11176	'IMP cyclohydrolase [EC:3.5.4.10]'	IMP cyclohydrolase [EC:3.5.4.10]	IMP cyclohydrolase	EC:3.5.4.10	Metabolism; Nucleotide Metabolism; Purine metabolism	Metabolism	Nucleotide Metabolism	Purine metabolism	-1	1	1
K00320	'coenzyme F420-dependent N5,N10-methenyltetrahydromethanopterin reductase [EC:1.5.99.11]'	coenzyme F420-dependent N5,N10-methenyltetrahydromethanopterin reductase [EC:1.5.99.11]	coenzyme F420-dependent N5,N10-methenyltetrahydromethanopterin reductase	EC:1.5.99.11	Metabolism; Energy Metabolism; Methane metabolism	Metabolism	Energy Metabolism	Methane metabolism	-1	-1	0
K06945	'None'	None	None	0	Unclassified; Poorly Characterized; General function prediction only	Unclassified	Poorly Characterized	General function prediction only	1	1	1
K01044	'carboxylesterase [EC:3.1.1.1]'	carboxylesterase [EC:3.1.1.1]	carboxylesterase	EC:3.1.1.1	Metabolism; Biosynthesis of Other Secondary Metabolites; Tropane, piperidine and pyridine alkaloid biosynthesis|Metabolism; Xenobiotics Biodegradation and Metabolism; Drug metabolism - other enzymes	Metabolism	Biosynthesis of Other Secondary Metabolites	Tropane, piperidine and pyridine alkaloid biosynthesis	0	1	1
K00810	'None'	None	None	0	Unclassified; Metabolism; Metabolism of cofactors and vitamins	Unclassified	Metabolism	Metabolism of cofactors and vitamins	1	1	-1
K03231	'elongation factor EF-1 alpha subunit [EC:3.6.5.3]; elongation factor 1-alpha'	elongation factor EF-1 alpha subunit [EC:3.6.5.3]; elongation factor 1-alpha	elongation factor EF-1 alpha subunit	EC:3.6.5.3	Genetic Information Processing; Translation; Translation factors|Genetic Information Processing; Translation; RNA transport	Genetic Information Processing	Translation	Translation factors	-1	-1	1
K03932	'polyhydroxybutyrate depolymerase'	polyhydroxybutyrate depolymerase	polyhydroxybutyrate depolymerase	0	Unclassified; Metabolism; Biosynthesis and biodegradation of secondary metabolites	Unclassified	Metabolism	Biosynthesis and biodegradation of secondary metabolites	1	1	-1
K11159	'carotenoid cleavage dioxygenase'	carotenoid cleavage dioxygenase	carotenoid cleavage dioxygenase	0	Unclassified; Metabolism; Biosynthesis and biodegradation of secondary metabolites	Unclassified	Metabolism	Biosynthesis and biodegradation of secondary metabolites	0	1	1
K05345	'putative cyclase [EC:4.6.1.-]'	putative cyclase [EC:4.6.1.-]	putative cyclase	EC:4.6.1.-	Unclassified; Metabolism; Others	Unclassified	Metabolism	Others	-1	-1	1
K00466	'tryptophan 2-monooxygenase [EC:1.13.12.3]'	tryptophan 2-monooxygenase [EC:1.13.12.3]	tryptophan 2-monooxygenase	EC:1.13.12.3	Metabolism; Amino Acid Metabolism; Tryptophan metabolism	Metabolism	Amino Acid Metabolism	Tryptophan metabolism	0	1	1
K00469	'inositol oxygenase [EC:1.13.99.1]'	inositol oxygenase [EC:1.13.99.1]	inositol oxygenase	EC:1.13.99.1	Metabolism; Carbohydrate Metabolism; Inositol phosphate metabolism|Metabolism; Carbohydrate Metabolism; Ascorbate and aldarate metabolism	Metabolism	Carbohydrate Metabolism	Inositol phosphate metabolism	1	1	-1
K02352	'drp35'	drp35	drp35	0	Metabolism; Biosynthesis of Other Secondary Metabolites; beta-Lactam resistance	Metabolism	Biosynthesis of Other Secondary Metabolites	beta-Lactam resistance	-1	1	1
K13573	'proteasome accessory factor C'	proteasome accessory factor C	proteasome accessory factor C	0	Unclassified; Genetic Information Processing; Protein folding and associated processing	Unclassified	Genetic Information Processing	Protein folding and associated processing	1	1	1
K07326	'hemolysin activation/secretion protein'	hemolysin activation/secretion protein	hemolysin activation/secretion protein	0	Human Diseases; Infectious Diseases; Pertussis	Human Diseases	Infectious Diseases	Pertussis	1	0	-1
K10843	'DNA excision repair protein ERCC-3 [EC:3.6.4.12]; DNA excision repair protein ERCC-3 [EC:3.6.1.-]'	DNA excision repair protein ERCC-3 [EC:3.6.4.12]; DNA excision repair protein ERCC-3 [EC:3.6.1.-]	DNA excision repair protein ERCC-3	EC:3.6.4.12	Genetic Information Processing; Replication and Repair; Nucleotide excision repair|Genetic Information Processing; Transcription; Transcription machinery|Genetic Information Processing; Transcription; Basal transcription factors|Genetic Information Processing; Replication and Repair; DNA repair and recombination proteins	Genetic Information Processing	Replication and Repair	Nucleotide excision repair	1	1	-1
K08354	'thiosulfate reductase cytochrome b subunit'	thiosulfate reductase cytochrome b subunit	thiosulfate reductase cytochrome b subunit	0	Unclassified; Cellular Processes and Signaling; Electron transfer carriers	Unclassified	Cellular Processes and Signaling	Electron transfer carriers	0	1	1
K06986	'None'	None	None	0	Unclassified; Poorly Characterized; General function prediction only	Unclassified	Poorly Characterized	General function prediction only	1	1	1
K02442	'membrane protein GlpM'	membrane protein GlpM	membrane protein GlpM	0	Unclassified; Poorly Characterized; General function prediction only	Unclassified	Poorly Characterized	General function prediction only	0	1	1
K08299	'carnitinyl-CoA dehydratase [EC:4.2.1.-]'	carnitinyl-CoA dehydratase [EC:4.2.1.-]	carnitinyl-CoA dehydratase	EC:4.2.1.-	Unclassified; Metabolism; Others	Unclassified	Metabolism	Others	0	1	1
K02182	'crotonobetaine/carnitine-CoA ligase [EC:6.2.1.-]'	crotonobetaine/carnitine-CoA ligase [EC:6.2.1.-]	crotonobetaine/carnitine-CoA ligase	EC:6.2.1.-	Unclassified; Metabolism; Others	Unclassified	Metabolism	Others	1	1	1
K10984	'PTS system, galactosamine-specific IIB component [EC:2.7.1.69]'	PTS system, galactosamine-specific IIB component [EC:2.7.1.69]	PTS system, galactosamine-specific IIB component	EC:2.7.1.69	Environmental Information Processing; Membrane Transport; Phosphotransferase system (PTS)|Environmental Information Processing; Membrane Transport; Transporters|Metabolism; Carbohydrate Metabolism; Galactose metabolism	Environmental Information Processing	Membrane Transport	Phosphotransferase system (PTS)	-1	1	1
K07465	'putative RecB family exonuclease'	putative RecB family exonuclease	putative RecB family exonuclease	0	Unclassified; Genetic Information Processing; Replication, recombination and repair proteins	Unclassified	Genetic Information Processing	Replication, recombination and repair proteins	1	1	-1
K07466	'replication factor A1'	replication factor A1	replication factor A1	0	Genetic Information Processing; Replication and Repair; DNA repair and recombination proteins|Genetic Information Processing; Replication and Repair; Mismatch repair|Genetic Information Processing; Transcription; Transcription factors|Genetic Information Processing; Replication and Repair; Nucleotide excision repair|Genetic Information Processing; Replication and Repair; DNA replication|Genetic I…	Genetic Information Processing	Replication and Repair	DNA repair and recombination proteins	-1	-1	1
K07463	'archaea-specific RecJ-like exonuclease'	archaea-specific RecJ-like exonuclease	archaea-specific RecJ-like exonuclease	0	Unclassified; Genetic Information Processing; Replication, recombination and repair proteins	Unclassified	Genetic Information Processing	Replication, recombination and repair proteins	-1	-1	1
K10673	'streptomycin 3"-kinase [EC:2.7.1.87]'	streptomycin 3"-kinase [EC:2.7.1.87]	streptomycin 3"-kinase	EC:2.7.1.87	Unclassified; Metabolism; Others	Unclassified	Metabolism	Others	0	1	1
K08721	'multidrug resistance outer membrane protein OprJ'	multidrug resistance outer membrane protein OprJ	multidrug resistance outer membrane protein OprJ	0	Unclassified; Cellular Processes and Signaling; Pores ion channels	Unclassified	Cellular Processes and Signaling	Pores ion channels	1	1	1
K00446	'catechol 2,3-dioxygenase [EC:1.13.11.2]'	catechol 2,3-dioxygenase [EC:1.13.11.2]	catechol 2,3-dioxygenase	EC:1.13.11.2	Metabolism; Xenobiotics Biodegradation and Metabolism; Xylene degradation|Metabolism; Xenobiotics Biodegradation and Metabolism; Chlorocyclohexane and chlorobenzene degradation|Metabolism; Xenobiotics Biodegradation and Metabolism; Styrene degradation|Metabolism; Xenobiotics Biodegradation and Metabolism; Benzoate degradation	Metabolism	Xenobiotics Biodegradation and Metabolism	Xylene degradation	-1	-1	-1
K03396	'S-(hydroxymethyl)glutathione synthase [EC:4.4.1.22]'	S-(hydroxymethyl)glutathione synthase [EC:4.4.1.22]	S-(hydroxymethyl)glutathione synthase	EC:4.4.1.22	Metabolism; Energy Metabolism; Methane metabolism	Metabolism	Energy Metabolism	Methane metabolism	0	1	1
K12136	'hydrogenase-4 component A [EC:1.-.-.-]'	hydrogenase-4 component A [EC:1.-.-.-]	hydrogenase-4 component A	EC:1.-.-.-	Unclassified; Metabolism; Energy metabolism	Unclassified	Metabolism	Energy metabolism	1	0	-1
K12139	'hydrogenase-4 component D [EC:1.-.-.-]'	hydrogenase-4 component D [EC:1.-.-.-]	hydrogenase-4 component D	EC:1.-.-.-	Unclassified; Metabolism; Energy metabolism	Unclassified	Metabolism	Energy metabolism	1	1	-1
K11444	'two-component system, chemotaxis family, response regulator WspR [EC:2.7.7.65]'	two-component system, chemotaxis family, response regulator WspR [EC:2.7.7.65]	two-component system, chemotaxis family, response regulator WspR	EC:2.7.7.65	Environmental Information Processing; Signal Transduction; Two-component system	Environmental Information Processing	Signal Transduction	Two-component system	0	1	1
K11442	'putative uridylyltransferase [EC:2.7.7.-]'	putative uridylyltransferase [EC:2.7.7.-]	putative uridylyltransferase	EC:2.7.7.-	Unclassified; Metabolism; Carbohydrate metabolism	Unclassified	Metabolism	Carbohydrate metabolism	-1	1	1
K10240	'cellobiose transport system substrate-binding protein'	cellobiose transport system substrate-binding protein	cellobiose transport system substrate-binding protein	0	Environmental Information Processing; Membrane Transport; ABC transporters|Environmental Information Processing; Membrane Transport; Transporters	Environmental Information Processing	Membrane Transport	ABC transporters	0	1	1
K10241	'cellobiose transport system permease protein'	cellobiose transport system permease protein	cellobiose transport system permease protein	0	Environmental Information Processing; Membrane Transport; ABC transporters|Environmental Information Processing; Membrane Transport; Transporters	Environmental Information Processing	Membrane Transport	ABC transporters	0	1	1
K04110	'benzoate-CoA ligase [EC:6.2.1.25]'	benzoate-CoA ligase [EC:6.2.1.25]	benzoate-CoA ligase	EC:6.2.1.25	Metabolism; Xenobiotics Biodegradation and Metabolism; Aminobenzoate degradation|Metabolism; Xenobiotics Biodegradation and Metabolism; Benzoate degradation	Metabolism	Xenobiotics Biodegradation and Metabolism	Aminobenzoate degradation	1	1	1
K09934	'hypothetical protein'	hypothetical protein	hypothetical protein	0	Unclassified; Poorly Characterized; Function unknown	Unclassified	Poorly Characterized	Function unknown	0	1	1
K06216	'putative ribose uptake protein'	putative ribose uptake protein	putative ribose uptake protein	0	Unclassified; Cellular Processes and Signaling; Other ion-coupled transporters	Unclassified	Cellular Processes and Signaling	Other ion-coupled transporters	1	1	-1
K01707	'5-dehydro-4-deoxyglucarate dehydratase [EC:4.2.1.41]'	5-dehydro-4-deoxyglucarate dehydratase [EC:4.2.1.41]	5-dehydro-4-deoxyglucarate dehydratase	EC:4.2.1.41	Metabolism; Carbohydrate Metabolism; Ascorbate and aldarate metabolism	Metabolism	Carbohydrate Metabolism	Ascorbate and aldarate metabolism	1	1	1
K14166	'copper transport protein'	copper transport protein	copper transport protein	0	Unclassified; Cellular Processes and Signaling; Other transporters	Unclassified	Cellular Processes and Signaling	Other transporters	-1	1	1
K06860	'None'	None	None	0	Unclassified; Poorly Characterized; General function prediction only	Unclassified	Poorly Characterized	General function prediction only	1	1	1
K13686	'arabinofuranosyltransferase [EC:2.4.2.-]'	arabinofuranosyltransferase [EC:2.4.2.-]	arabinofuranosyltransferase	EC:2.4.2.-	Metabolism; Glycan Biosynthesis and Metabolism; Glycosyltransferases	Metabolism	Glycan Biosynthesis and Metabolism	Glycosyltransferases	1	0	-1
K14159	'ribonuclease HI / DNA polymerase III subunit epsilon [EC:3.1.26.4 2.7.7.7]'	ribonuclease HI / DNA polymerase III subunit epsilon [EC:3.1.26.4 2.7.7.7]	ribonuclease HI / DNA polymerase III subunit epsilon	EC:3.1.26.4	Metabolism; Nucleotide Metabolism; Pyrimidine metabolism|Genetic Information Processing; Replication and Repair; DNA repair and recombination proteins|Metabolism; Nucleotide Metabolism; Purine metabolism|Genetic Information Processing; Replication and Repair; Mismatch repair|Genetic Information Processing; Replication and Repair; Homologous recombination|Genetic Information Processing; Replicatio…	Metabolism	Nucleotide Metabolism	Pyrimidine metabolism	1	0	-1
K13531	'methylated-DNA-[protein]-cysteine S-methyltransferase [EC:2.1.1.63]'	methylated-DNA-[protein]-cysteine S-methyltransferase [EC:2.1.1.63]	methylated-DNA-[protein]-cysteine S-methyltransferase	EC:2.1.1.63	Genetic Information Processing; Replication and Repair; DNA repair and recombination proteins	Genetic Information Processing	Replication and Repair	DNA repair and recombination proteins	1	1	-1
K13530	'AraC family transcriptional regulator, regulatory protein of adaptative response / methylphosphotriester-DNA alkyltransferase methyltransferase [EC:2.1.1.-]'	AraC family transcriptional regulator, regulatory protein of adaptative response / methylphosphotriester-DNA alkyltransferase methyltransferase [EC:2.1.1.-]	AraC family transcriptional regulator, regulatory protein of adaptative response / methylphosphotriester-DNA alkyltransferase methyltransferase	EC:2.1.1.-	Genetic Information Processing; Transcription; Transcription factors|Genetic Information Processing; Replication and Repair; DNA repair and recombination proteins	Genetic Information Processing	Transcription	Transcription factors	1	1	-1
K14060	'putative DNA-invertase from lambdoid prophage Rac'	putative DNA-invertase from lambdoid prophage Rac	putative DNA-invertase from lambdoid prophage Rac	0	Unclassified; Genetic Information Processing; Replication, recombination and repair proteins	Unclassified	Genetic Information Processing	Replication, recombination and repair proteins	0	1	1
K00693	'glycogen(starch) synthase [EC:2.4.1.11]'	glycogen(starch) synthase [EC:2.4.1.11]	glycogen(starch) synthase	EC:2.4.1.11	Metabolism; Glycan Biosynthesis and Metabolism; Glycosyltransferases|Metabolism; Carbohydrate Metabolism; Starch and sucrose metabolism|Organismal Systems; Endocrine System; Insulin signaling pathway	Metabolism	Glycan Biosynthesis and Metabolism	Glycosyltransferases	-1	-1	1
K10228	'sorbitol/mannitol transport system permease protein'	sorbitol/mannitol transport system permease protein	sorbitol/mannitol transport system permease protein	0	Environmental Information Processing; Membrane Transport; ABC transporters|Environmental Information Processing; Membrane Transport; Transporters	Environmental Information Processing	Membrane Transport	ABC transporters	1	1	1
K10229	'sorbitol/mannitol transport system permease protein'	sorbitol/mannitol transport system permease protein	sorbitol/mannitol transport system permease protein	0	Environmental Information Processing; Membrane Transport; ABC transporters|Environmental Information Processing; Membrane Transport; Transporters	Environmental Information Processing	Membrane Transport	ABC transporters	1	1	1
K10227	'sorbitol/mannitol transport system substrate-binding protein'	sorbitol/mannitol transport system substrate-binding protein	sorbitol/mannitol transport system substrate-binding protein	0	Environmental Information Processing; Membrane Transport; ABC transporters|Environmental Information Processing; Membrane Transport; Transporters	Environmental Information Processing	Membrane Transport	ABC transporters	1	1	1
K08164	'MFS transporter, DHA1 family, chloramphenicol resistance protein'	MFS transporter, DHA1 family, chloramphenicol resistance protein	MFS transporter, DHA1 family, chloramphenicol resistance protein	0	Environmental Information Processing; Membrane Transport; Transporters	Environmental Information Processing	Membrane Transport	Transporters	0	1	1
K02497	'HemX protein'	HemX protein	HemX protein	0	Unclassified; Cellular Processes and Signaling; Membrane and intracellular structural molecules	Unclassified	Cellular Processes and Signaling	Membrane and intracellular structural molecules	-1	1	1
K02234	'cobalamin biosynthesis protein CobW'	cobalamin biosynthesis protein CobW	cobalamin biosynthesis protein CobW	0	Metabolism; Metabolism of Cofactors and Vitamins; Porphyrin and chlorophyll metabolism	Metabolism	Metabolism of Cofactors and Vitamins	Porphyrin and chlorophyll metabolism	1	1	1
K11898	'type VI secretion system protein ImpE'	type VI secretion system protein ImpE	type VI secretion system protein ImpE	0	Environmental Information Processing; Membrane Transport; Secretion system	Environmental Information Processing	Membrane Transport	Secretion system	1	1	1
K11897	'type VI secretion system protein ImpF'	type VI secretion system protein ImpF	type VI secretion system protein ImpF	0	Environmental Information Processing; Membrane Transport; Secretion system	Environmental Information Processing	Membrane Transport	Secretion system	1	1	1
K04337	'curli production assembly/transport component CsgE'	curli production assembly/transport component CsgE	curli production assembly/transport component CsgE	0	Environmental Information Processing; Membrane Transport; Secretion system	Environmental Information Processing	Membrane Transport	Secretion system	0	1	1
K10208	'dehydrosqualene synthase [EC:2.5.1.-]'	dehydrosqualene synthase [EC:2.5.1.-]	dehydrosqualene synthase	EC:2.5.1.-	Metabolism; Metabolism of Terpenoids and Polyketides; Prenyltransferases|Metabolism; Metabolism of Terpenoids and Polyketides; Carotenoid biosynthesis	Metabolism	Metabolism of Terpenoids and Polyketides	Prenyltransferases	-1	1	1
K10209	'dehydrosqualene desaturase [EC:1.14.99.-]'	dehydrosqualene desaturase [EC:1.14.99.-]	dehydrosqualene desaturase	EC:1.14.99.-	Metabolism; Metabolism of Terpenoids and Polyketides; Carotenoid biosynthesis	Metabolism	Metabolism of Terpenoids and Polyketides	Carotenoid biosynthesis	-1	1	1
K00217	'maleylacetate reductase [EC:1.3.1.32]'	maleylacetate reductase [EC:1.3.1.32]	maleylacetate reductase	EC:1.3.1.32	Metabolism; Xenobiotics Biodegradation and Metabolism; Toluene degradation|Metabolism; Xenobiotics Biodegradation and Metabolism; Chlorocyclohexane and chlorobenzene degradation|Metabolism; Xenobiotics Biodegradation and Metabolism; Fluorobenzoate degradation|Metabolism; Xenobiotics Biodegradation and Metabolism; Benzoate degradation	Metabolism	Xenobiotics Biodegradation and Metabolism	Toluene degradation	0	1	1
K13472	'sulfotransferase'	sulfotransferase	sulfotransferase	0	Organismal Systems; Environmental Adaptation; Plant-pathogen interaction	Organismal Systems	Environmental Adaptation	Plant-pathogen interaction	0	1	1
K06026	'None'	None	None	0	Unclassified; Metabolism; Others	Unclassified	Metabolism	Others	-1	-1	1
K09744	'hypothetical protein'	hypothetical protein	hypothetical protein	0	Unclassified; Poorly Characterized; Function unknown	Unclassified	Poorly Characterized	Function unknown	-1	1	1
K06351	'inhibitor of KinA'	inhibitor of KinA	inhibitor of KinA	0	Unclassified; Cellular Processes and Signaling; Sporulation	Unclassified	Cellular Processes and Signaling	Sporulation	1	1	-1
K14338	'cytochrome P450 / NADPH-cytochrome P450 reductase [EC:1.14.14.1 1.6.2.4]'	cytochrome P450 / NADPH-cytochrome P450 reductase [EC:1.14.14.1 1.6.2.4]	cytochrome P450 / NADPH-cytochrome P450 reductase	EC:1.14.14.1	Metabolism; Xenobiotics Biodegradation and Metabolism; Aminobenzoate degradation|Metabolism; Amino Acid Metabolism; Tryptophan metabolism|Metabolism; Lipid Metabolism; Fatty acid metabolism	Metabolism	Xenobiotics Biodegradation and Metabolism	Aminobenzoate degradation	0	1	1
K14339	'alpha-1,6-mannosyltransferase [EC:2.4.1.-]'	alpha-1,6-mannosyltransferase [EC:2.4.1.-]	alpha-1,6-mannosyltransferase	EC:2.4.1.-	Metabolism; Glycan Biosynthesis and Metabolism; Glycosyltransferases	Metabolism	Glycan Biosynthesis and Metabolism	Glycosyltransferases	1	0	-1
K14335	'alpha-1,6-mannosyltransferase [EC:2.4.1.-]'	alpha-1,6-mannosyltransferase [EC:2.4.1.-]	alpha-1,6-mannosyltransferase	EC:2.4.1.-	Metabolism; Glycan Biosynthesis and Metabolism; Glycosyltransferases	Metabolism	Glycan Biosynthesis and Metabolism	Glycosyltransferases	1	1	1
K14337	'alpha-1,6-mannosyltransferase [EC:2.4.1.-]'	alpha-1,6-mannosyltransferase [EC:2.4.1.-]	alpha-1,6-mannosyltransferase	EC:2.4.1.-	Metabolism; Glycan Biosynthesis and Metabolism; Glycosyltransferases	Metabolism	Glycan Biosynthesis and Metabolism	Glycosyltransferases	1	0	-1
K14333	'2,3-dihydroxybenzoate decarboxylase [EC:4.1.1.46]'	2,3-dihydroxybenzoate decarboxylase [EC:4.1.1.46]	2,3-dihydroxybenzoate decarboxylase	EC:4.1.1.46	Metabolism; Xenobiotics Biodegradation and Metabolism; Aminobenzoate degradation|Metabolism; Xenobiotics Biodegradation and Metabolism; Benzoate degradation	Metabolism	Xenobiotics Biodegradation and Metabolism	Aminobenzoate degradation	1	1	1
K08280	'lipopolysaccharide O-acetyltransferase [EC:2.3.1.-]'	lipopolysaccharide O-acetyltransferase [EC:2.3.1.-]	lipopolysaccharide O-acetyltransferase	EC:2.3.1.-	Metabolism; Glycan Biosynthesis and Metabolism; Lipopolysaccharide biosynthesis proteins	Metabolism	Glycan Biosynthesis and Metabolism	Lipopolysaccharide biosynthesis proteins	1	1	-1
K12993	'alpha-1,2-rhamnosyltransferase [EC:2.4.1.-]'	alpha-1,2-rhamnosyltransferase [EC:2.4.1.-]	alpha-1,2-rhamnosyltransferase	EC:2.4.1.-	Metabolism; Glycan Biosynthesis and Metabolism; Glycosyltransferases|Metabolism; Glycan Biosynthesis and Metabolism; Lipopolysaccharide biosynthesis proteins	Metabolism	Glycan Biosynthesis and Metabolism	Glycosyltransferases	0	1	1
K12991	'rhamnosyltransferase [EC:2.4.1.-]'	rhamnosyltransferase [EC:2.4.1.-]	rhamnosyltransferase	EC:2.4.1.-	Metabolism; Glycan Biosynthesis and Metabolism; Glycosyltransferases|Metabolism; Glycan Biosynthesis and Metabolism; Lipopolysaccharide biosynthesis proteins	Metabolism	Glycan Biosynthesis and Metabolism	Glycosyltransferases	0	1	1
K12994	'alpha-1,3-rhamnosyltransferase [EC:2.4.1.-]'	alpha-1,3-rhamnosyltransferase [EC:2.4.1.-]	alpha-1,3-rhamnosyltransferase	EC:2.4.1.-	Metabolism; Glycan Biosynthesis and Metabolism; Glycosyltransferases|Metabolism; Glycan Biosynthesis and Metabolism; Lipopolysaccharide biosynthesis proteins	Metabolism	Glycan Biosynthesis and Metabolism	Glycosyltransferases	1	1	1
K01906	'6-carboxyhexanoate--CoA ligase [EC:6.2.1.14]'	6-carboxyhexanoate--CoA ligase [EC:6.2.1.14]	6-carboxyhexanoate--CoA ligase	EC:6.2.1.14	Metabolism; Metabolism of Cofactors and Vitamins; Biotin metabolism	Metabolism	Metabolism of Cofactors and Vitamins	Biotin metabolism	1	0	-1
K06597	'chemosensory pili system protein ChpB (putative protein-glutamate methylesterase)'	chemosensory pili system protein ChpB (putative protein-glutamate methylesterase)	chemosensory pili system protein ChpB (putative protein-glutamate methylesterase)	0	Cellular Processes; Cell Motility; Bacterial motility proteins|Environmental Information Processing; Signal Transduction; Two-component system	Cellular Processes	Cell Motility	Bacterial motility proteins	1	1	-1
K14585	'trans-o-hydroxybenzylidenepyruvate hydratase-aldolase [EC:4.1.2.45]'	trans-o-hydroxybenzylidenepyruvate hydratase-aldolase [EC:4.1.2.45]	trans-o-hydroxybenzylidenepyruvate hydratase-aldolase	EC:4.1.2.45	Metabolism; Xenobiotics Biodegradation and Metabolism; Naphthalene degradation	Metabolism	Xenobiotics Biodegradation and Metabolism	Naphthalene degradation	1	1	1
K14582	'cis-1,2-dihydro-1,2-dihydroxynaphthalene/dibenzothiophene dihydrodiol dehydrogenase [EC:1.3.1.29 1.3.1.60]'	cis-1,2-dihydro-1,2-dihydroxynaphthalene/dibenzothiophene dihydrodiol dehydrogenase [EC:1.3.1.29 1.3.1.60]	cis-1,2-dihydro-1,2-dihydroxynaphthalene/dibenzothiophene dihydrodiol dehydrogenase	EC:1.3.1.29	Metabolism; Xenobiotics Biodegradation and Metabolism; Polycyclic aromatic hydrocarbon degradation|Metabolism; Xenobiotics Biodegradation and Metabolism; Naphthalene degradation	Metabolism	Xenobiotics Biodegradation and Metabolism	Polycyclic aromatic hydrocarbon degradation	-1	-1	-1
K10019	'octopine/nopaline transport system permease protein'	octopine/nopaline transport system permease protein	octopine/nopaline transport system permease protein	0	Environmental Information Processing; Membrane Transport; ABC transporters|Environmental Information Processing; Membrane Transport; Transporters	Environmental Information Processing	Membrane Transport	ABC transporters	0	1	1
K01461	'N-acyl-D-glutamate deacylase [EC:3.5.1.82]'	N-acyl-D-glutamate deacylase [EC:3.5.1.82]	N-acyl-D-glutamate deacylase	EC:3.5.1.82	Unclassified; Metabolism; Others	Unclassified	Metabolism	Others	1	1	1
K05549	'benzoate 1,2-dioxygenase alpha subunit [EC:1.14.12.10]'	benzoate 1,2-dioxygenase alpha subunit [EC:1.14.12.10]	benzoate 1,2-dioxygenase alpha subunit	EC:1.14.12.10	Metabolism; Xenobiotics Biodegradation and Metabolism; Fluorobenzoate degradation|Metabolism; Xenobiotics Biodegradation and Metabolism; Benzoate degradation	Metabolism	Xenobiotics Biodegradation and Metabolism	Fluorobenzoate degradation	0	1	1
K05548	'MFS transporter, AAHS family, benzoate transport protein'	MFS transporter, AAHS family, benzoate transport protein	MFS transporter, AAHS family, benzoate transport protein	0	Environmental Information Processing; Membrane Transport; Transporters	Environmental Information Processing	Membrane Transport	Transporters	0	1	1
K11629	'two-component system, OmpR family, bacitracin resistance sensor histidine kinase BceS [EC:2.7.13.3]'	two-component system, OmpR family, bacitracin resistance sensor histidine kinase BceS [EC:2.7.13.3]	two-component system, OmpR family, bacitracin resistance sensor histidine kinase BceS	EC:2.7.13.3	Metabolism; Enzyme Families; Protein kinases|Environmental Information Processing; Signal Transduction; Two-component system	Metabolism	Enzyme Families	Protein kinases	-1	1	1
K09925	'hypothetical protein'	hypothetical protein	hypothetical protein	0	Unclassified; Poorly Characterized; Function unknown	Unclassified	Poorly Characterized	Function unknown	1	1	1
K10716	'voltage-gated potassium channel'	voltage-gated potassium channel	voltage-gated potassium channel	0	Unclassified; Cellular Processes and Signaling; Pores ion channels	Unclassified	Cellular Processes and Signaling	Pores ion channels	1	0	-1
K10715	'two-component system, sensor histidine kinase [EC:2.7.13.3]; two-component system, sensor histidine kinase RpfC [EC:2.7.13.3]'	two-component system, sensor histidine kinase [EC:2.7.13.3]; two-component system, sensor histidine kinase RpfC [EC:2.7.13.3]	two-component system, sensor histidine kinase	EC:2.7.13.3	Metabolism; Enzyme Families; Protein kinases|Environmental Information Processing; Signal Transduction; Two-component system	Metabolism	Enzyme Families	Protein kinases	1	1	-1
K07785	'MFS transporter, NRE family, putaive nickel resistance protein'	MFS transporter, NRE family, putaive nickel resistance protein	MFS transporter, NRE family, putaive nickel resistance protein	0	Environmental Information Processing; Membrane Transport; Transporters|Environmental Information Processing; Signal Transduction; Two-component system	Environmental Information Processing	Membrane Transport	Transporters	0	1	1
K14661	'nodulation protein F [EC:2.3.1.-]'	nodulation protein F [EC:2.3.1.-]	nodulation protein F	EC:2.3.1.-	None	None	0	0	0	1	1
K00785	'beta-galactosamide-alpha-2,3-sialyltransferase [EC:2.4.99.-]'	beta-galactosamide-alpha-2,3-sialyltransferase [EC:2.4.99.-]	beta-galactosamide-alpha-2,3-sialyltransferase	EC:2.4.99.-	Metabolism; Glycan Biosynthesis and Metabolism; Glycosyltransferases	Metabolism	Glycan Biosynthesis and Metabolism	Glycosyltransferases	1	0	-1
K00035	'D-galactose 1-dehydrogenase [EC:1.1.1.48]'	D-galactose 1-dehydrogenase [EC:1.1.1.48]	D-galactose 1-dehydrogenase	EC:1.1.1.48	Metabolism; Carbohydrate Metabolism; Galactose metabolism	Metabolism	Carbohydrate Metabolism	Galactose metabolism	1	1	-1
K00256	'isoquinoline 1-oxidoreductase [EC:1.3.99.16]'	isoquinoline 1-oxidoreductase [EC:1.3.99.16]	isoquinoline 1-oxidoreductase	EC:1.3.99.16	Unclassified; Metabolism; Energy metabolism	Unclassified	Metabolism	Energy metabolism	1	1	1
K02250	'competence protein ComK'	competence protein ComK	competence protein ComK	0	Environmental Information Processing; Membrane Transport; Secretion system	Environmental Information Processing	Membrane Transport	Secretion system	-1	1	1
K03124	'transcription initiation factor TFIIB'	transcription initiation factor TFIIB	transcription initiation factor TFIIB	0	Genetic Information Processing; Transcription; Transcription machinery|Genetic Information Processing; Transcription; Basal transcription factors	Genetic Information Processing	Transcription	Transcription machinery	-1	-1	1
K11387	'arabinosyltransferase C [EC:2.4.2.-]'	arabinosyltransferase C [EC:2.4.2.-]	arabinosyltransferase C	EC:2.4.2.-	Metabolism; Glycan Biosynthesis and Metabolism; Glycosyltransferases	Metabolism	Glycan Biosynthesis and Metabolism	Glycosyltransferases	1	0	-1
K11383	'two-component system, NtrC family, sensor histidine kinase KinB [EC:2.7.13.3]'	two-component system, NtrC family, sensor histidine kinase KinB [EC:2.7.13.3]	two-component system, NtrC family, sensor histidine kinase KinB	EC:2.7.13.3	Metabolism; Enzyme Families; Protein kinases|Environmental Information Processing; Signal Transduction; Two-component system	Metabolism	Enzyme Families	Protein kinases	0	1	1
K11949	'4-(2-carboxyphenyl)-2-oxobut-3-enoate aldolase [EC:4.1.2.34]'	4-(2-carboxyphenyl)-2-oxobut-3-enoate aldolase [EC:4.1.2.34]	4-(2-carboxyphenyl)-2-oxobut-3-enoate aldolase	EC:4.1.2.34	Metabolism; Xenobiotics Biodegradation and Metabolism; Polycyclic aromatic hydrocarbon degradation	Metabolism	Xenobiotics Biodegradation and Metabolism	Polycyclic aromatic hydrocarbon degradation	1	1	1
K07044	'None'	None	None	0	Unclassified; Poorly Characterized; General function prediction only	Unclassified	Poorly Characterized	General function prediction only	1	-1	-1
K05784	'benzoate 1,2-dioxygenase electron transfer component'	benzoate 1,2-dioxygenase electron transfer component	benzoate 1,2-dioxygenase electron transfer component	0	Metabolism; Xenobiotics Biodegradation and Metabolism; Fluorobenzoate degradation|Metabolism; Xenobiotics Biodegradation and Metabolism; Benzoate degradation	Metabolism	Xenobiotics Biodegradation and Metabolism	Fluorobenzoate degradation	0	1	1
K03339	'6-phospho-5-dehydro-2-deoxy-D-gluconate aldolase [EC:4.1.2.29]'	6-phospho-5-dehydro-2-deoxy-D-gluconate aldolase [EC:4.1.2.29]	6-phospho-5-dehydro-2-deoxy-D-gluconate aldolase	EC:4.1.2.29	Metabolism; Carbohydrate Metabolism; Inositol phosphate metabolism	Metabolism	Carbohydrate Metabolism	Inositol phosphate metabolism	1	1	1
K03333	'cholesterol oxidase [EC:1.1.3.6]'	cholesterol oxidase [EC:1.1.3.6]	cholesterol oxidase	EC:1.1.3.6	Metabolism; Lipid Metabolism; Steroid biosynthesis	Metabolism	Lipid Metabolism	Steroid biosynthesis	1	1	1
K10552	'fructose transport system substrate-binding protein'	fructose transport system substrate-binding protein	fructose transport system substrate-binding protein	0	Environmental Information Processing; Membrane Transport; ABC transporters|Environmental Information Processing; Membrane Transport; Transporters	Environmental Information Processing	Membrane Transport	ABC transporters	0	1	1
K10553	'fructose transport system permease protein'	fructose transport system permease protein	fructose transport system permease protein	0	Environmental Information Processing; Membrane Transport; ABC transporters|Environmental Information Processing; Membrane Transport; Transporters	Environmental Information Processing	Membrane Transport	ABC transporters	0	1	1
K10554	'fructose transport system ATP-binding protein'	fructose transport system ATP-binding protein	fructose transport system ATP-binding protein	0	Environmental Information Processing; Membrane Transport; ABC transporters|Environmental Information Processing; Membrane Transport; Transporters	Environmental Information Processing	Membrane Transport	ABC transporters	0	1	1
K07231	'putative iron-regulated protein'	putative iron-regulated protein	putative iron-regulated protein	0	Unclassified; Cellular Processes and Signaling; Inorganic ion transport and metabolism	Unclassified	Cellular Processes and Signaling	Inorganic ion transport and metabolism	1	1	1
K07230	'None'	None	None	0	Unclassified; Cellular Processes and Signaling; Inorganic ion transport and metabolism	Unclassified	Cellular Processes and Signaling	Inorganic ion transport and metabolism	1	1	1
K00011	'aldehyde reductase [EC:1.1.1.21]'	aldehyde reductase [EC:1.1.1.21]	aldehyde reductase	EC:1.1.1.21	Metabolism; Carbohydrate Metabolism; Fructose and mannose metabolism|Metabolism; Carbohydrate Metabolism; Pyruvate metabolism|Metabolism; Carbohydrate Metabolism; Pentose and glucuronate interconversions|Metabolism; Lipid Metabolism; Glycerolipid metabolism|Metabolism; Carbohydrate Metabolism; Galactose metabolism	Metabolism	Carbohydrate Metabolism	Fructose and mannose metabolism	-1	-1	1
K08253	'non-specific protein-tyrosine kinase [EC:2.7.10.2]'	non-specific protein-tyrosine kinase [EC:2.7.10.2]	non-specific protein-tyrosine kinase	EC:2.7.10.2	Unclassified; Cellular Processes and Signaling; Signal transduction mechanisms	Unclassified	Cellular Processes and Signaling	Signal transduction mechanisms	0	1	1
K08255	'CoA-disulfide reductase [EC:1.8.1.14]'	CoA-disulfide reductase [EC:1.8.1.14]	CoA-disulfide reductase	EC:1.8.1.14	Unclassified; Metabolism; Others	Unclassified	Metabolism	Others	-1	1	1
K01274	'D-alanyl-D-alanine dipeptidase [EC:3.4.13.-]'	D-alanyl-D-alanine dipeptidase [EC:3.4.13.-]	D-alanyl-D-alanine dipeptidase	EC:3.4.13.-	Unclassified; Cellular Processes and Signaling; Membrane and intracellular structural molecules	Unclassified	Cellular Processes and Signaling	Membrane and intracellular structural molecules	1	1	1
K12541	'ATP-binding cassette, subfamily C, bacterial LapB'	ATP-binding cassette, subfamily C, bacterial LapB	ATP-binding cassette, subfamily C, bacterial LapB	0	Environmental Information Processing; Membrane Transport; Secretion system	Environmental Information Processing	Membrane Transport	Secretion system	0	1	1
K12543	'outer membrane protein LapE'	outer membrane protein LapE	outer membrane protein LapE	0	Environmental Information Processing; Membrane Transport; Secretion system	Environmental Information Processing	Membrane Transport	Secretion system	0	1	1
K12542	'membrane fusion protein LapC'	membrane fusion protein LapC	membrane fusion protein LapC	0	Environmental Information Processing; Membrane Transport; Secretion system	Environmental Information Processing	Membrane Transport	Secretion system	0	1	1
K12549	'surface adhesion protein'	surface adhesion protein	surface adhesion protein	0	Unclassified; Cellular Processes and Signaling; Cell motility and secretion	Unclassified	Cellular Processes and Signaling	Cell motility and secretion	0	1	1
K11016	'hemolysin'	hemolysin	hemolysin	0	Environmental Information Processing; Membrane Transport; Secretion system|Environmental Information Processing; Signaling Molecules and Interaction; Bacterial toxins|Environmental Information Processing; Membrane Transport; Bacterial secretion system	Environmental Information Processing	Membrane Transport	Secretion system	0	1	1
K11017	'hemolysin activation/secretion protein??'	hemolysin activation/secretion protein??	hemolysin activation/secretion protein??	0	Environmental Information Processing; Membrane Transport; Secretion system|Environmental Information Processing; Signaling Molecules and Interaction; Bacterial toxins|Environmental Information Processing; Membrane Transport; Bacterial secretion system	Environmental Information Processing	Membrane Transport	Secretion system	0	1	1
K11014	'cytolethal distending toxin subunit B'	cytolethal distending toxin subunit B	cytolethal distending toxin subunit B	0	Environmental Information Processing; Signaling Molecules and Interaction; Bacterial toxins	Environmental Information Processing	Signaling Molecules and Interaction	Bacterial toxins	1	1	1
K11015	'cytolethal distending toxin subunit C'	cytolethal distending toxin subunit C	cytolethal distending toxin subunit C	0	Environmental Information Processing; Signaling Molecules and Interaction; Bacterial toxins	Environmental Information Processing	Signaling Molecules and Interaction	Bacterial toxins	1	1	1
K11013	'cytolethal distending toxin subunit A'	cytolethal distending toxin subunit A	cytolethal distending toxin subunit A	0	Environmental Information Processing; Signaling Molecules and Interaction; Bacterial toxins	Environmental Information Processing	Signaling Molecules and Interaction	Bacterial toxins	1	1	1
K06882	'None'	None	None	0	Unclassified; Poorly Characterized; General function prediction only	Unclassified	Poorly Characterized	General function prediction only	1	1	1
K06887	'None'	None	None	0	Unclassified; Poorly Characterized; General function prediction only	Unclassified	Poorly Characterized	General function prediction only	0	1	1
K00485	'dimethylaniline monooxygenase (N-oxide forming) [EC:1.14.13.8]'	dimethylaniline monooxygenase (N-oxide forming) [EC:1.14.13.8]	dimethylaniline monooxygenase (N-oxide forming)	EC:1.14.13.8	Metabolism; Xenobiotics Biodegradation and Metabolism; Drug metabolism - cytochrome P450|Metabolism; Energy Metabolism; Methane metabolism	Metabolism	Xenobiotics Biodegradation and Metabolism	Drug metabolism - cytochrome P450	0	1	1
K07681	'two-component system, NarL family, vancomycin resistance sensor histidine kinase VraS [EC:2.7.13.3]'	two-component system, NarL family, vancomycin resistance sensor histidine kinase VraS [EC:2.7.13.3]	two-component system, NarL family, vancomycin resistance sensor histidine kinase VraS	EC:2.7.13.3	Metabolism; Enzyme Families; Protein kinases|Environmental Information Processing; Signal Transduction; Two-component system	Metabolism	Enzyme Families	Protein kinases	-1	1	1
K04016	'formate-dependent nitrite reductase, possible assembly protein; cytochrome c-type protein NrfE'	formate-dependent nitrite reductase, possible assembly protein; cytochrome c-type protein NrfE	formate-dependent nitrite reductase, possible assembly protein; cytochrome c-type protein NrfE	0	Metabolism; Energy Metabolism; Nitrogen metabolism	Metabolism	Energy Metabolism	Nitrogen metabolism	1	1	1
K07064	'None'	None	None	0	Unclassified; Poorly Characterized; General function prediction only	Unclassified	Poorly Characterized	General function prediction only	-1	1	1
K01121	'2'',3''-cyclic-nucleotide 3''-phosphodiesterase [EC:3.1.4.37]'	2',3'-cyclic-nucleotide 3'-phosphodiesterase [EC:3.1.4.37]	2',3'-cyclic-nucleotide 3'-phosphodiesterase	EC:3.1.4.37	Unclassified; Metabolism; Nucleotide metabolism	Unclassified	Metabolism	Nucleotide metabolism	1	1	1
K13623	'S-adenosylmethionine-diacylgycerolhomoserine-N-methlytransferase'	S-adenosylmethionine-diacylgycerolhomoserine-N-methlytransferase	S-adenosylmethionine-diacylgycerolhomoserine-N-methlytransferase	0	Metabolism; Lipid Metabolism; Glycerophospholipid metabolism	Metabolism	Lipid Metabolism	Glycerophospholipid metabolism	0	1	1
K12976	'lipid A 3-O-deacylase [EC:3.1.-.-]'	lipid A 3-O-deacylase [EC:3.1.-.-]	lipid A 3-O-deacylase	EC:3.1.-.-	Metabolism; Glycan Biosynthesis and Metabolism; Lipopolysaccharide biosynthesis proteins	Metabolism	Glycan Biosynthesis and Metabolism	Lipopolysaccharide biosynthesis proteins	1	1	1
K14750	'ethylbenzene dioxygenase ferredoxin component'	ethylbenzene dioxygenase ferredoxin component	ethylbenzene dioxygenase ferredoxin component	0	None	None	0	0	1	1	1
K14751	'2,3-dihydroxyethylbenzene 1,2-dioxygenase [EC:1.13.11.-]'	2,3-dihydroxyethylbenzene 1,2-dioxygenase [EC:1.13.11.-]	2,3-dihydroxyethylbenzene 1,2-dioxygenase	EC:1.13.11.-	None	None	0	0	1	1	1
K00154	'coniferyl-aldehyde dehydrogenase [EC:1.2.1.68]'	coniferyl-aldehyde dehydrogenase [EC:1.2.1.68]	coniferyl-aldehyde dehydrogenase	EC:1.2.1.68	Unclassified; Metabolism; Energy metabolism	Unclassified	Metabolism	Energy metabolism	1	1	1
K10533	'limonene-1,2-epoxide hydrolase [EC:3.3.2.8]'	limonene-1,2-epoxide hydrolase [EC:3.3.2.8]	limonene-1,2-epoxide hydrolase	EC:3.3.2.8	Metabolism; Metabolism of Terpenoids and Polyketides; Limonene and pinene degradation	Metabolism	Metabolism of Terpenoids and Polyketides	Limonene and pinene degradation	-1	-1	0
K00293	'saccharopine dehydrogenase (NADP+, L-glutamate forming) [EC:1.5.1.10]'	saccharopine dehydrogenase (NADP+, L-glutamate forming) [EC:1.5.1.10]	saccharopine dehydrogenase (NADP+, L-glutamate forming)	EC:1.5.1.10	Metabolism; Amino Acid Metabolism; Lysine degradation|Metabolism; Amino Acid Metabolism; Lysine biosynthesis	Metabolism	Amino Acid Metabolism	Lysine degradation	-1	-1	1
K03921	'acyl-[acyl-carrier-protein] desaturase [EC:1.14.19.2]'	acyl-[acyl-carrier-protein] desaturase [EC:1.14.19.2]	acyl-[acyl-carrier-protein] desaturase	EC:1.14.19.2	Metabolism; Lipid Metabolism; Fatty acid biosynthesis|Metabolism; Lipid Metabolism; Lipid biosynthesis proteins|Metabolism; Lipid Metabolism; Biosynthesis of unsaturated fatty acids	Metabolism	Lipid Metabolism	Fatty acid biosynthesis	1	1	-1
K05523	'molecular chaperone HchA (Hsp31)'	molecular chaperone HchA (Hsp31)	molecular chaperone HchA (Hsp31)	0	Unclassified; Genetic Information Processing; Protein folding and associated processing	Unclassified	Genetic Information Processing	Protein folding and associated processing	1	1	1
K03379	'cyclohexanone monooxygenase [EC:1.14.13.22]'	cyclohexanone monooxygenase [EC:1.14.13.22]	cyclohexanone monooxygenase	EC:1.14.13.22	Metabolism; Xenobiotics Biodegradation and Metabolism; Caprolactam degradation	Metabolism	Xenobiotics Biodegradation and Metabolism	Caprolactam degradation	-1	-1	0
K11930	'periplasmic protein TorT'	periplasmic protein TorT	periplasmic protein TorT	0	Unclassified; Metabolism; Carbohydrate metabolism	Unclassified	Metabolism	Carbohydrate metabolism	0	1	1
K11935	'biofilm PGA synthesis protein PgaA'	biofilm PGA synthesis protein PgaA	biofilm PGA synthesis protein PgaA	0	Unclassified; Cellular Processes and Signaling; Membrane and intracellular structural molecules	Unclassified	Cellular Processes and Signaling	Membrane and intracellular structural molecules	0	1	1
K11937	'biofilm PGA synthesis protein PgaD'	biofilm PGA synthesis protein PgaD	biofilm PGA synthesis protein PgaD	0	Unclassified; Cellular Processes and Signaling; Membrane and intracellular structural molecules	Unclassified	Cellular Processes and Signaling	Membrane and intracellular structural molecules	0	1	1
K11936	'biofilm PGA synthesis N-glycosyltransferase PgaC [EC:2.4.-.-]'	biofilm PGA synthesis N-glycosyltransferase PgaC [EC:2.4.-.-]	biofilm PGA synthesis N-glycosyltransferase PgaC	EC:2.4.-.-	Unclassified; Cellular Processes and Signaling; Membrane and intracellular structural molecules	Unclassified	Cellular Processes and Signaling	Membrane and intracellular structural molecules	0	1	1
K02480	'two-component system, NarL family, sensor kinase [EC:2.7.13.3]'	two-component system, NarL family, sensor kinase [EC:2.7.13.3]	two-component system, NarL family, sensor kinase	EC:2.7.13.3	Metabolism; Enzyme Families; Protein kinases|Environmental Information Processing; Signal Transduction; Two-component system	Metabolism	Enzyme Families	Protein kinases	1	1	1
K02487	'type IV pili sensor histidine kinase and response regulator'	type IV pili sensor histidine kinase and response regulator	type IV pili sensor histidine kinase and response regulator	0	Cellular Processes; Cell Motility; Bacterial motility proteins|Environmental Information Processing; Signal Transduction; Two-component system	Cellular Processes	Cell Motility	Bacterial motility proteins	1	1	1
K08605	'coccolysin [EC:3.4.24.30]'	coccolysin [EC:3.4.24.30]	coccolysin	EC:3.4.24.30	Metabolism; Enzyme Families; Peptidases	Metabolism	Enzyme Families	Peptidases	1	1	-1
K09950	'hypothetical protein'	hypothetical protein	hypothetical protein	0	Unclassified; Poorly Characterized; Function unknown	Unclassified	Poorly Characterized	Function unknown	1	1	1
K14189	'uncharacterized oxidoreductase [EC:1.-.-.-]'	uncharacterized oxidoreductase [EC:1.-.-.-]	uncharacterized oxidoreductase	EC:1.-.-.-	Unclassified; Cellular Processes and Signaling; Membrane and intracellular structural molecules	Unclassified	Cellular Processes and Signaling	Membrane and intracellular structural molecules	1	1	1
K02763	'PTS system, D-glucosamine-specific IIA component [EC:2.7.1.69]'	PTS system, D-glucosamine-specific IIA component [EC:2.7.1.69]	PTS system, D-glucosamine-specific IIA component	EC:2.7.1.69	Metabolism; Carbohydrate Metabolism; Amino sugar and nucleotide sugar metabolism|Environmental Information Processing; Membrane Transport; Phosphotransferase system (PTS)|Environmental Information Processing; Membrane Transport; Transporters	Metabolism	Carbohydrate Metabolism	Amino sugar and nucleotide sugar metabolism	-1	1	1
K00947	'None'	None	None	0	Unclassified; Metabolism; Others	Unclassified	Metabolism	Others	1	1	1
K07647	'two-component system, OmpR family, sensor histidine kinase TorS [EC:2.7.13.3]'	two-component system, OmpR family, sensor histidine kinase TorS [EC:2.7.13.3]	two-component system, OmpR family, sensor histidine kinase TorS	EC:2.7.13.3	Metabolism; Enzyme Families; Protein kinases|Environmental Information Processing; Signal Transduction; Two-component system	Metabolism	Enzyme Families	Protein kinases	0	1	1
K07020	'None'	None	None	0	Unclassified; Poorly Characterized; General function prediction only	Unclassified	Poorly Characterized	General function prediction only	0	1	1
K01170	'tRNA-intron endonuclease, archaea type [EC:3.1.27.9]; tRNA-intron endonuclease [EC:3.1.27.9]'	tRNA-intron endonuclease, archaea type [EC:3.1.27.9]; tRNA-intron endonuclease [EC:3.1.27.9]	tRNA-intron endonuclease, archaea type	EC:3.1.27.9	Unclassified; Genetic Information Processing; Translation proteins	Unclassified	Genetic Information Processing	Translation proteins	-1	-1	1
K14578	'naphthalene 1,2-dioxygenase system ferredoxin subunit'	naphthalene 1,2-dioxygenase system ferredoxin subunit	naphthalene 1,2-dioxygenase system ferredoxin subunit	0	Metabolism; Xenobiotics Biodegradation and Metabolism; Ethylbenzene degradation|Metabolism; Xenobiotics Biodegradation and Metabolism; Polycyclic aromatic hydrocarbon degradation|Metabolism; Xenobiotics Biodegradation and Metabolism; Naphthalene degradation	Metabolism	Xenobiotics Biodegradation and Metabolism	Ethylbenzene degradation	1	0	-1
K14579	'naphthalene 1,2-dioxygenase subunit alpha [EC:1.14.12.12]'	naphthalene 1,2-dioxygenase subunit alpha [EC:1.14.12.12]	naphthalene 1,2-dioxygenase subunit alpha	EC:1.14.12.12	Metabolism; Xenobiotics Biodegradation and Metabolism; Ethylbenzene degradation|Metabolism; Xenobiotics Biodegradation and Metabolism; Polycyclic aromatic hydrocarbon degradation|Metabolism; Xenobiotics Biodegradation and Metabolism; Naphthalene degradation	Metabolism	Xenobiotics Biodegradation and Metabolism	Ethylbenzene degradation	1	1	1
K11919	'type VI secretion system lysozyme-related protein'	type VI secretion system lysozyme-related protein	type VI secretion system lysozyme-related protein	0	Environmental Information Processing; Membrane Transport; Secretion system	Environmental Information Processing	Membrane Transport	Secretion system	0	1	1
K11918	'type VI secretion system protein'	type VI secretion system protein	type VI secretion system protein	0	Environmental Information Processing; Membrane Transport; Secretion system	Environmental Information Processing	Membrane Transport	Secretion system	0	1	1
K12062	'conjugal transfer pilin signal peptidase TrbI'	conjugal transfer pilin signal peptidase TrbI	conjugal transfer pilin signal peptidase TrbI	0	Environmental Information Processing; Membrane Transport; Secretion system	Environmental Information Processing	Membrane Transport	Secretion system	1	1	1
K12064	'conjugal transfer pilus assembly protein TraV'	conjugal transfer pilus assembly protein TraV	conjugal transfer pilus assembly protein TraV	0	Environmental Information Processing; Membrane Transport; Secretion system	Environmental Information Processing	Membrane Transport	Secretion system	1	1	1
K12065	'conjugal transfer pilus assembly protein TraB'	conjugal transfer pilus assembly protein TraB	conjugal transfer pilus assembly protein TraB	0	Environmental Information Processing; Membrane Transport; Secretion system	Environmental Information Processing	Membrane Transport	Secretion system	1	1	1
K07256	'taurine dehydrogenase large subunit [EC:1.4.2.-]'	taurine dehydrogenase large subunit [EC:1.4.2.-]	taurine dehydrogenase large subunit	EC:1.4.2.-	Metabolism; Metabolism of Other Amino Acids; Taurine and hypotaurine metabolism|Metabolism; Energy Metabolism; Nitrogen metabolism	Metabolism	Metabolism of Other Amino Acids	Taurine and hypotaurine metabolism	1	1	1
K01617	'4-oxalocrotonate decarboxylase [EC:4.1.1.77]'	4-oxalocrotonate decarboxylase [EC:4.1.1.77]	4-oxalocrotonate decarboxylase	EC:4.1.1.77	Metabolism; Xenobiotics Biodegradation and Metabolism; Xylene degradation|Metabolism; Xenobiotics Biodegradation and Metabolism; Dioxin degradation|Metabolism; Xenobiotics Biodegradation and Metabolism; Benzoate degradation	Metabolism	Xenobiotics Biodegradation and Metabolism	Xylene degradation	1	1	1
K05281	'2''-hydroxyisoflavone reductase [EC:1.3.1.45]'	2'-hydroxyisoflavone reductase [EC:1.3.1.45]	2'-hydroxyisoflavone reductase	EC:1.3.1.45	Metabolism; Biosynthesis of Other Secondary Metabolites; Isoflavonoid biosynthesis	Metabolism	Biosynthesis of Other Secondary Metabolites	Isoflavonoid biosynthesis	1	1	-1
K09709	'hypothetical protein; mesaconyl-C4 CoA hydratase'	hypothetical protein; mesaconyl-C4 CoA hydratase	hypothetical protein; mesaconyl-C4 CoA hydratase	0	Metabolism; Energy Metabolism; Carbon fixation pathways in prokaryotes	Metabolism	Energy Metabolism	Carbon fixation pathways in prokaryotes	1	1	1
K05915	'None'	None	None	0	Metabolism; Xenobiotics Biodegradation and Metabolism; Bisphenol degradation|Metabolism; Xenobiotics Biodegradation and Metabolism; Naphthalene degradation	Metabolism	Xenobiotics Biodegradation and Metabolism	Bisphenol degradation	0	1	1
K09146	'hypothetical protein'	hypothetical protein	hypothetical protein	0	Unclassified; Poorly Characterized; Function unknown	Unclassified	Poorly Characterized	Function unknown	1	0	-1
K05709	'small terminal subunit of phenylpropionate dioxygenase [EC:1.14.12.19]'	small terminal subunit of phenylpropionate dioxygenase [EC:1.14.12.19]	small terminal subunit of phenylpropionate dioxygenase	EC:1.14.12.19	Metabolism; Amino Acid Metabolism; Phenylalanine metabolism	Metabolism	Amino Acid Metabolism	Phenylalanine metabolism	1	1	-1
K05708	'large terminal subunit of phenylpropionate dioxygenase [EC:1.14.12.19]'	large terminal subunit of phenylpropionate dioxygenase [EC:1.14.12.19]	large terminal subunit of phenylpropionate dioxygenase	EC:1.14.12.19	Metabolism; Amino Acid Metabolism; Phenylalanine metabolism	Metabolism	Amino Acid Metabolism	Phenylalanine metabolism	1	1	-1
K05877	'methyl-accepting chemotaxis protein IV, peptide sensor receptor'	methyl-accepting chemotaxis protein IV, peptide sensor receptor	methyl-accepting chemotaxis protein IV, peptide sensor receptor	0	Cellular Processes; Cell Motility; Bacterial motility proteins|Cellular Processes; Cell Motility; Bacterial chemotaxis|Environmental Information Processing; Signal Transduction; Two-component system	Cellular Processes	Cell Motility	Bacterial motility proteins	0	1	1
K08085	'type IV fimbrial biogenesis protein FimU'	type IV fimbrial biogenesis protein FimU	type IV fimbrial biogenesis protein FimU	0	Environmental Information Processing; Membrane Transport; Secretion system	Environmental Information Processing	Membrane Transport	Secretion system	0	1	1
K10211	'4,4''-diaponeurosporenoate glycosyltransferase [EC:2.4.1.-]'	4,4'-diaponeurosporenoate glycosyltransferase [EC:2.4.1.-]	4,4'-diaponeurosporenoate glycosyltransferase	EC:2.4.1.-	Metabolism; Metabolism of Terpenoids and Polyketides; Carotenoid biosynthesis	Metabolism	Metabolism of Terpenoids and Polyketides	Carotenoid biosynthesis	-1	1	1
K00186	'2-oxoisovalerate ferredoxin oxidoreductase, alpha subunit [EC:1.2.7.7]'	2-oxoisovalerate ferredoxin oxidoreductase, alpha subunit [EC:1.2.7.7]	2-oxoisovalerate ferredoxin oxidoreductase, alpha subunit	EC:1.2.7.7	Metabolism; Amino Acid Metabolism; Valine, leucine and isoleucine degradation	Metabolism	Amino Acid Metabolism	Valine, leucine and isoleucine degradation	-1	1	1
K00187	'2-oxoisovalerate ferredoxin oxidoreductase, beta subunit [EC:1.2.7.7]'	2-oxoisovalerate ferredoxin oxidoreductase, beta subunit [EC:1.2.7.7]	2-oxoisovalerate ferredoxin oxidoreductase, beta subunit	EC:1.2.7.7	Metabolism; Amino Acid Metabolism; Valine, leucine and isoleucine degradation	Metabolism	Amino Acid Metabolism	Valine, leucine and isoleucine degradation	-1	1	1
K00188	'2-oxoisovalerate ferredoxin oxidoreductase, delta subunit [EC:1.2.7.7]'	2-oxoisovalerate ferredoxin oxidoreductase, delta subunit [EC:1.2.7.7]	2-oxoisovalerate ferredoxin oxidoreductase, delta subunit	EC:1.2.7.7	Metabolism; Amino Acid Metabolism; Valine, leucine and isoleucine degradation	Metabolism	Amino Acid Metabolism	Valine, leucine and isoleucine degradation	-1	1	1
K14949	'serine/threonine-protein kinase PknG [EC:2.7.11.1]'	serine/threonine-protein kinase PknG [EC:2.7.11.1]	serine/threonine-protein kinase PknG	EC:2.7.11.1	None	None	0	0	1	0	-1
K08985	'putative lipoprotein'	putative lipoprotein	putative lipoprotein	0	Unclassified; Poorly Characterized; Function unknown	Unclassified	Poorly Characterized	Function unknown	0	1	1
K08989	'putative membrane protein'	putative membrane protein	putative membrane protein	0	Unclassified; Poorly Characterized; Function unknown	Unclassified	Poorly Characterized	Function unknown	1	1	1
K00510	'heme oxygenase [EC:1.14.99.3]'	heme oxygenase [EC:1.14.99.3]	heme oxygenase	EC:1.14.99.3	Organismal Systems; Digestive System; Mineral absorption|Metabolism; Metabolism of Cofactors and Vitamins; Porphyrin and chlorophyll metabolism	Organismal Systems	Digestive System	Mineral absorption	1	0	-1
K05971	'None'	None	None	0	Unclassified; Metabolism; Others	Unclassified	Metabolism	Others	-1	-1	1
K02448	'nitric-oxide reductase NorD protein [EC:1.7.99.7]; nitric oxide reductase NorD protein'	nitric-oxide reductase NorD protein [EC:1.7.99.7]; nitric oxide reductase NorD protein	nitric-oxide reductase NorD protein	EC:1.7.99.7	Metabolism; Energy Metabolism; Nitrogen metabolism	Metabolism	Energy Metabolism	Nitrogen metabolism	0	1	1
K13007	'Fuc2NAc and GlcNAc transferase [EC:2.4.1.-]'	Fuc2NAc and GlcNAc transferase [EC:2.4.1.-]	Fuc2NAc and GlcNAc transferase	EC:2.4.1.-	Metabolism; Glycan Biosynthesis and Metabolism; Glycosyltransferases|Metabolism; Glycan Biosynthesis and Metabolism; Lipopolysaccharide biosynthesis proteins	Metabolism	Glycan Biosynthesis and Metabolism	Glycosyltransferases	0	1	1
K10814	'hydrogen cyanide synthase HcnA [EC:1.4.99.5]'	hydrogen cyanide synthase HcnA [EC:1.4.99.5]	hydrogen cyanide synthase HcnA	EC:1.4.99.5	Metabolism; Metabolism of Other Amino Acids; Cyanoamino acid metabolism|Environmental Information Processing; Signaling Molecules and Interaction; Bacterial toxins	Metabolism	Metabolism of Other Amino Acids	Cyanoamino acid metabolism	0	1	1
K10816	'hydrogen cyanide synthase HcnC [EC:1.4.99.5]'	hydrogen cyanide synthase HcnC [EC:1.4.99.5]	hydrogen cyanide synthase HcnC	EC:1.4.99.5	Metabolism; Metabolism of Other Amino Acids; Cyanoamino acid metabolism|Environmental Information Processing; Signaling Molecules and Interaction; Bacterial toxins	Metabolism	Metabolism of Other Amino Acids	Cyanoamino acid metabolism	0	1	1
K06214	'curli production assembly/transport component CsgG'	curli production assembly/transport component CsgG	curli production assembly/transport component CsgG	0	Environmental Information Processing; Membrane Transport; Secretion system	Environmental Information Processing	Membrane Transport	Secretion system	1	1	-1
K02305	'nitric-oxide reductase, cytochrome c-containing subunit II [EC:1.7.99.7]; nitric oxide reductase, cytochrome c-containing subunit II'	nitric-oxide reductase, cytochrome c-containing subunit II [EC:1.7.99.7]; nitric oxide reductase, cytochrome c-containing subunit II	nitric-oxide reductase, cytochrome c-containing subunit II	EC:1.7.99.7	Metabolism; Energy Metabolism; Nitrogen metabolism	Metabolism	Energy Metabolism	Nitrogen metabolism	-1	1	1
K12437	'polyketide synthase 13'	polyketide synthase 13	polyketide synthase 13	0	Metabolism; Lipid Metabolism; Lipid biosynthesis proteins	Metabolism	Lipid Metabolism	Lipid biosynthesis proteins	1	0	-1
K00539	'None'	None	None	0	Metabolism; Xenobiotics Biodegradation and Metabolism; Chloroalkane and chloroalkene degradation|Metabolism; Xenobiotics Biodegradation and Metabolism; Chlorocyclohexane and chlorobenzene degradation|Metabolism; Xenobiotics Biodegradation and Metabolism; Bisphenol degradation|Metabolism; Xenobiotics Biodegradation and Metabolism; 1,1,1-Trichloro-2,2-bis(4-chlorophenyl)ethane (DDT) degradation	Metabolism	Xenobiotics Biodegradation and Metabolism	Chloroalkane and chloroalkene degradation	1	0	-1
K14268	'5-aminovalerate aminotransferase [EC:2.6.1.48]'	5-aminovalerate aminotransferase [EC:2.6.1.48]	5-aminovalerate aminotransferase	EC:2.6.1.48	Metabolism; Amino Acid Metabolism; Lysine degradation|Metabolism; Amino Acid Metabolism; Amino acid related enzymes	Metabolism	Amino Acid Metabolism	Lysine degradation	0	1	1
K14269	'glutarate semialdehyde dehydrogenase [EC:1.2.1.20]'	glutarate semialdehyde dehydrogenase [EC:1.2.1.20]	glutarate semialdehyde dehydrogenase	EC:1.2.1.20	Metabolism; Amino Acid Metabolism; Lysine degradation	Metabolism	Amino Acid Metabolism	Lysine degradation	0	1	1
K01483	'ureidoglycolate hydrolase [EC:3.5.3.19]'	ureidoglycolate hydrolase [EC:3.5.3.19]	ureidoglycolate hydrolase	EC:3.5.3.19	Metabolism; Nucleotide Metabolism; Purine metabolism	Metabolism	Nucleotide Metabolism	Purine metabolism	1	1	1
K08685	'quinohemoprotein amine dehydrogenase [EC:1.4.98.1]; amine dehydrogenase [EC:1.4.99.3]'	quinohemoprotein amine dehydrogenase [EC:1.4.98.1]; amine dehydrogenase [EC:1.4.99.3]	quinohemoprotein amine dehydrogenase	EC:1.4.98.1	Metabolism; Energy Metabolism; Methane metabolism	Metabolism	Energy Metabolism	Methane metabolism	1	0	-1
K08687	'N-carbamoylsarcosine amidase [EC:3.5.1.59]'	N-carbamoylsarcosine amidase [EC:3.5.1.59]	N-carbamoylsarcosine amidase	EC:3.5.1.59	Metabolism; Amino Acid Metabolism; Arginine and proline metabolism	Metabolism	Amino Acid Metabolism	Arginine and proline metabolism	0	1	1
K08686	'2-chlorobenzoate 1,2-dioxygenase [EC:1.14.12.13]'	2-chlorobenzoate 1,2-dioxygenase [EC:1.14.12.13]	2-chlorobenzoate 1,2-dioxygenase	EC:1.14.12.13	Metabolism; Xenobiotics Biodegradation and Metabolism; Fluorobenzoate degradation	Metabolism	Xenobiotics Biodegradation and Metabolism	Fluorobenzoate degradation	0	1	1
K04940	'opine dehydrogenase [EC:1.5.1.28]'	opine dehydrogenase [EC:1.5.1.28]	opine dehydrogenase	EC:1.5.1.28	Unclassified; Metabolism; Others	Unclassified	Metabolism	Others	0	1	1
K03418	'N,N-dimethylformamidase [EC:3.5.1.56]'	N,N-dimethylformamidase [EC:3.5.1.56]	N,N-dimethylformamidase	EC:3.5.1.56	Metabolism; Carbohydrate Metabolism; Glyoxylate and dicarboxylate metabolism	Metabolism	Carbohydrate Metabolism	Glyoxylate and dicarboxylate metabolism	0	1	1
K13540	'precorrin-2 C20-methyltransferase / precorrin-3B C17-methyltransferase [EC:2.1.1.130 2.1.1.131]'	precorrin-2 C20-methyltransferase / precorrin-3B C17-methyltransferase [EC:2.1.1.130 2.1.1.131]	precorrin-2 C20-methyltransferase / precorrin-3B C17-methyltransferase	EC:2.1.1.130	Metabolism; Metabolism of Cofactors and Vitamins; Porphyrin and chlorophyll metabolism	Metabolism	Metabolism of Cofactors and Vitamins	Porphyrin and chlorophyll metabolism	1	0	-1
K12145	'hydrogenase-4 component J [EC:1.-.-.-]'	hydrogenase-4 component J [EC:1.-.-.-]	hydrogenase-4 component J	EC:1.-.-.-	Unclassified; Metabolism; Energy metabolism	Unclassified	Metabolism	Energy metabolism	1	0	-1
K12144	'hydrogenase-4 component I [EC:1.-.-.-]'	hydrogenase-4 component I [EC:1.-.-.-]	hydrogenase-4 component I	EC:1.-.-.-	Unclassified; Metabolism; Energy metabolism	Unclassified	Metabolism	Energy metabolism	1	0	-1
K12142	'hydrogenase-4 component G [EC:1.-.-.-]'	hydrogenase-4 component G [EC:1.-.-.-]	hydrogenase-4 component G	EC:1.-.-.-	Unclassified; Metabolism; Energy metabolism	Unclassified	Metabolism	Energy metabolism	1	0	-1
K10815	'hydrogen cyanide synthase HcnB [EC:1.4.99.5]'	hydrogen cyanide synthase HcnB [EC:1.4.99.5]	hydrogen cyanide synthase HcnB	EC:1.4.99.5	Metabolism; Metabolism of Other Amino Acids; Cyanoamino acid metabolism|Environmental Information Processing; Signaling Molecules and Interaction; Bacterial toxins	Metabolism	Metabolism of Other Amino Acids	Cyanoamino acid metabolism	0	1	1
K01415	'endothelin-converting enzyme [EC:3.4.24.71]'	endothelin-converting enzyme [EC:3.4.24.71]	endothelin-converting enzyme	EC:3.4.24.71	Metabolism; Enzyme Families; Peptidases	Metabolism	Enzyme Families	Peptidases	1	0	-1
K10210	'4,4''-diaponeurosporene oxidase [EC:1.-.-.-]'	4,4'-diaponeurosporene oxidase [EC:1.-.-.-]	4,4'-diaponeurosporene oxidase	EC:1.-.-.-	Metabolism; Metabolism of Terpenoids and Polyketides; Carotenoid biosynthesis	Metabolism	Metabolism of Terpenoids and Polyketides	Carotenoid biosynthesis	-1	1	1
K03202	'type IV secretion system protein VirB7'	type IV secretion system protein VirB7	type IV secretion system protein VirB7	0	Environmental Information Processing; Membrane Transport; Secretion system|Environmental Information Processing; Membrane Transport; Bacterial secretion system	Environmental Information Processing	Membrane Transport	Secretion system	0	1	1
K03208	'colanic acid biosynthesis glycosyl transferase WcaI'	colanic acid biosynthesis glycosyl transferase WcaI	colanic acid biosynthesis glycosyl transferase WcaI	0	Unclassified; Cellular Processes and Signaling; Membrane and intracellular structural molecules	Unclassified	Cellular Processes and Signaling	Membrane and intracellular structural molecules	1	1	-1
K09461	'anthraniloyl-CoA monooxygenase [EC:1.14.13.40]'	anthraniloyl-CoA monooxygenase [EC:1.14.13.40]	anthraniloyl-CoA monooxygenase	EC:1.14.13.40	Metabolism; Xenobiotics Biodegradation and Metabolism; Aminobenzoate degradation	Metabolism	Xenobiotics Biodegradation and Metabolism	Aminobenzoate degradation	1	1	1
K00477	'phytanoyl-CoA hydroxylase [EC:1.14.11.18]'	phytanoyl-CoA hydroxylase [EC:1.14.11.18]	phytanoyl-CoA hydroxylase	EC:1.14.11.18	Cellular Processes; Transport and Catabolism; Peroxisome	Cellular Processes	Transport and Catabolism	Peroxisome	1	0	-1
K00470	'None'	None	None	0	Unclassified; Metabolism; Others	Unclassified	Metabolism	Others	-1	-1	0
K00471	'gamma-butyrobetaine dioxygenase [EC:1.14.11.1]'	gamma-butyrobetaine dioxygenase [EC:1.14.11.1]	gamma-butyrobetaine dioxygenase	EC:1.14.11.1	Metabolism; Amino Acid Metabolism; Lysine degradation	Metabolism	Amino Acid Metabolism	Lysine degradation	0	1	1
K00479	'Rieske 2Fe-2S family protein'	Rieske 2Fe-2S family protein	Rieske 2Fe-2S family protein	0	Unclassified; Poorly Characterized; General function prediction only	Unclassified	Poorly Characterized	General function prediction only	0	1	1
K09926	'hypothetical protein'	hypothetical protein	hypothetical protein	0	Unclassified; Poorly Characterized; Function unknown	Unclassified	Poorly Characterized	Function unknown	1	1	1
K03692	'glucosylglycerol-phosphate synthase [EC:2.4.1.213]'	glucosylglycerol-phosphate synthase [EC:2.4.1.213]	glucosylglycerol-phosphate synthase	EC:2.4.1.213	Unclassified; Metabolism; Carbohydrate metabolism	Unclassified	Metabolism	Carbohydrate metabolism	1	1	-1
K07338	'hypothetical protein'	hypothetical protein	hypothetical protein	0	Unclassified; Cellular Processes and Signaling; Cell motility and secretion	Unclassified	Cellular Processes and Signaling	Cell motility and secretion	1	1	1
K05991	'None'	None	None	0	Unclassified; Metabolism; Others	Unclassified	Metabolism	Others	1	0	-1
K00317	'trimethylamine dehydrogenase [EC:1.5.8.2]'	trimethylamine dehydrogenase [EC:1.5.8.2]	trimethylamine dehydrogenase	EC:1.5.8.2	Metabolism; Energy Metabolism; Methane metabolism	Metabolism	Energy Metabolism	Methane metabolism	1	1	1
K00316	'spermidine dehydrogenase [EC:1.5.99.6]'	spermidine dehydrogenase [EC:1.5.99.6]	spermidine dehydrogenase	EC:1.5.99.6	Metabolism; Metabolism of Other Amino Acids; beta-Alanine metabolism|Metabolism; Amino Acid Metabolism; Arginine and proline metabolism	Metabolism	Metabolism of Other Amino Acids	beta-Alanine metabolism	0	1	1
K00314	'sarcosine dehydrogenase [EC:1.5.99.1]'	sarcosine dehydrogenase [EC:1.5.99.1]	sarcosine dehydrogenase	EC:1.5.99.1	Metabolism; Amino Acid Metabolism; Glycine, serine and threonine metabolism	Metabolism	Amino Acid Metabolism	Glycine, serine and threonine metabolism	0	1	1
K00300	'None'	None	None	0	Unclassified; Metabolism; Others	Unclassified	Metabolism	Others	-1	-1	1
K02641	'ferredoxin--NADP+ reductase [EC:1.18.1.2]'	ferredoxin--NADP+ reductase [EC:1.18.1.2]	ferredoxin--NADP+ reductase	EC:1.18.1.2	Metabolism; Energy Metabolism; Photosynthesis proteins|Metabolism; Energy Metabolism; Photosynthesis	Metabolism	Energy Metabolism	Photosynthesis proteins	-1	-1	1
K09990	'hypothetical protein'	hypothetical protein	hypothetical protein	0	Unclassified; Poorly Characterized; Function unknown	Unclassified	Poorly Characterized	Function unknown	1	1	1
K09994	'PhnO protein [EC:2.3.1.-]'	PhnO protein [EC:2.3.1.-]	PhnO protein	EC:2.3.1.-	Unclassified; Poorly Characterized; General function prediction only	Unclassified	Poorly Characterized	General function prediction only	-1	1	1
K01504	'glucosamine-6-phosphate isomerase [EC:3.5.99.6]'	glucosamine-6-phosphate isomerase [EC:3.5.99.6]	glucosamine-6-phosphate isomerase	EC:3.5.99.6	Unclassified; Metabolism; Carbohydrate metabolism	Unclassified	Metabolism	Carbohydrate metabolism	1	1	1
K12107	'cag pathogenicity island protein 22'	cag pathogenicity island protein 22	cag pathogenicity island protein 22	0	Environmental Information Processing; Membrane Transport; Secretion system	Environmental Information Processing	Membrane Transport	Secretion system	1	0	-1
K00663	'aminoglycoside N6''-acetyltransferase [EC:2.3.1.82]'	aminoglycoside N6'-acetyltransferase [EC:2.3.1.82]	aminoglycoside N6'-acetyltransferase	EC:2.3.1.82	Unclassified; Metabolism; Others	Unclassified	Metabolism	Others	-1	1	1
K06992	'None'	None	None	0	Unclassified; Poorly Characterized; General function prediction only	Unclassified	Poorly Characterized	General function prediction only	1	1	1
K00594	'xylitol oxidase [EC:1.1.3.41]'	xylitol oxidase [EC:1.1.3.41]	xylitol oxidase	EC:1.1.3.41	Unclassified; Metabolism; Others	Unclassified	Metabolism	Others	0	1	1
K04102	'4,5-dihydroxyphthalate decarboxylase [EC:4.1.1.55]'	4,5-dihydroxyphthalate decarboxylase [EC:4.1.1.55]	4,5-dihydroxyphthalate decarboxylase	EC:4.1.1.55	Metabolism; Xenobiotics Biodegradation and Metabolism; Polycyclic aromatic hydrocarbon degradation	Metabolism	Xenobiotics Biodegradation and Metabolism	Polycyclic aromatic hydrocarbon degradation	1	1	1
K13772	'Rrf2 family transcriptional regulator, iron-responsive regulator'	Rrf2 family transcriptional regulator, iron-responsive regulator	Rrf2 family transcriptional regulator, iron-responsive regulator	0	Genetic Information Processing; Transcription; Transcription factors	Genetic Information Processing	Transcription	Transcription factors	0	1	1
K13774	'citronellol/citronellal dehydrogenase'	citronellol/citronellal dehydrogenase	citronellol/citronellal dehydrogenase	0	Metabolism; Metabolism of Terpenoids and Polyketides; Geraniol degradation	Metabolism	Metabolism of Terpenoids and Polyketides	Geraniol degradation	0	1	1
K13777	'geranyl-CoA carboxylase alpha subunit [EC:6.4.1.5]'	geranyl-CoA carboxylase alpha subunit [EC:6.4.1.5]	geranyl-CoA carboxylase alpha subunit	EC:6.4.1.5	Metabolism; Metabolism of Terpenoids and Polyketides; Geraniol degradation	Metabolism	Metabolism of Terpenoids and Polyketides	Geraniol degradation	0	1	1
K13776	'citronellyl-CoA synthetase [EC:6.2.1.-]'	citronellyl-CoA synthetase [EC:6.2.1.-]	citronellyl-CoA synthetase	EC:6.2.1.-	Metabolism; Lipid Metabolism; Lipid biosynthesis proteins|Metabolism; Metabolism of Terpenoids and Polyketides; Geraniol degradation	Metabolism	Lipid Metabolism	Lipid biosynthesis proteins	0	1	1
K13779	'isohexenylglutaconyl-CoA hydratase [EC:4.2.1.57]'	isohexenylglutaconyl-CoA hydratase [EC:4.2.1.57]	isohexenylglutaconyl-CoA hydratase	EC:4.2.1.57	Metabolism; Metabolism of Terpenoids and Polyketides; Geraniol degradation	Metabolism	Metabolism of Terpenoids and Polyketides	Geraniol degradation	0	1	1
K13778	'geranyl-CoA carboxylase beta subunit [EC:6.4.1.5]'	geranyl-CoA carboxylase beta subunit [EC:6.4.1.5]	geranyl-CoA carboxylase beta subunit	EC:6.4.1.5	Metabolism; Metabolism of Terpenoids and Polyketides; Geraniol degradation	Metabolism	Metabolism of Terpenoids and Polyketides	Geraniol degradation	0	1	1
K02623	'LysR family transcriptional regulator, pca operon transcriptional activator'	LysR family transcriptional regulator, pca operon transcriptional activator	LysR family transcriptional regulator, pca operon transcriptional activator	0	Genetic Information Processing; Transcription; Transcription factors	Genetic Information Processing	Transcription	Transcription factors	0	1	1
K08286	'protein-serine/threonine kinase [EC:2.7.11.-]'	protein-serine/threonine kinase [EC:2.7.11.-]	protein-serine/threonine kinase	EC:2.7.11.-	Unclassified; Cellular Processes and Signaling; Signal transduction mechanisms	Unclassified	Cellular Processes and Signaling	Signal transduction mechanisms	0	1	1
K11731	'citronellyl-CoA dehydrogenase [EC:1.3.99.-]'	citronellyl-CoA dehydrogenase [EC:1.3.99.-]	citronellyl-CoA dehydrogenase	EC:1.3.99.-	Metabolism; Metabolism of Terpenoids and Polyketides; Geraniol degradation	Metabolism	Metabolism of Terpenoids and Polyketides	Geraniol degradation	0	1	1
K07476	'toprim domain protein'	toprim domain protein	toprim domain protein	0	Unclassified; Genetic Information Processing; Replication, recombination and repair proteins	Unclassified	Genetic Information Processing	Replication, recombination and repair proteins	-1	1	1
K00122	'formate dehydrogenase [EC:1.2.1.2]'	formate dehydrogenase [EC:1.2.1.2]	formate dehydrogenase	EC:1.2.1.2	Metabolism; Carbohydrate Metabolism; Glyoxylate and dicarboxylate metabolism|Metabolism; Energy Metabolism; Methane metabolism	Metabolism	Carbohydrate Metabolism	Glyoxylate and dicarboxylate metabolism	0	1	1
K00126	'formate dehydrogenase, delta subunit [EC:1.2.1.2]'	formate dehydrogenase, delta subunit [EC:1.2.1.2]	formate dehydrogenase, delta subunit	EC:1.2.1.2	Metabolism; Carbohydrate Metabolism; Glyoxylate and dicarboxylate metabolism|Metabolism; Energy Metabolism; Methane metabolism	Metabolism	Carbohydrate Metabolism	Glyoxylate and dicarboxylate metabolism	1	1	1
K14347	'solute carrier family 10 (sodium/bile acid cotransporter), member 7'	solute carrier family 10 (sodium/bile acid cotransporter), member 7	solute carrier family 10 (sodium/bile acid cotransporter), member 7	0	None	None	0	0	0	1	1
K08977	'putative membrane protein'	putative membrane protein	putative membrane protein	0	Unclassified; Poorly Characterized; Function unknown	Unclassified	Poorly Characterized	Function unknown	-1	-1	1
K13525	'transitional endoplasmic reticulum ATPase'	transitional endoplasmic reticulum ATPase	transitional endoplasmic reticulum ATPase	0	Genetic Information Processing; Folding, Sorting and Degradation; Protein processing in endoplasmic reticulum	Genetic Information Processing	Folding, Sorting and Degradation	Protein processing in endoplasmic reticulum	-1	-1	1
K03384	'None'	None	None	0	Metabolism; Xenobiotics Biodegradation and Metabolism; Chlorocyclohexane and chlorobenzene degradation|Metabolism; Xenobiotics Biodegradation and Metabolism; Toluene degradation|Metabolism; Xenobiotics Biodegradation and Metabolism; Naphthalene degradation|Metabolism; Xenobiotics Biodegradation and Metabolism; Polycyclic aromatic hydrocarbon degradation|Metabolism; Xenobiotics Biodegradation and …	Metabolism	Xenobiotics Biodegradation and Metabolism	Chlorocyclohexane and chlorobenzene degradation	1	0	-1
K03381	'catechol 1,2-dioxygenase [EC:1.13.11.1]'	catechol 1,2-dioxygenase [EC:1.13.11.1]	catechol 1,2-dioxygenase	EC:1.13.11.1	Metabolism; Xenobiotics Biodegradation and Metabolism; Toluene degradation|Metabolism; Xenobiotics Biodegradation and Metabolism; Chlorocyclohexane and chlorobenzene degradation|Metabolism; Xenobiotics Biodegradation and Metabolism; Fluorobenzoate degradation|Metabolism; Xenobiotics Biodegradation and Metabolism; Benzoate degradation	Metabolism	Xenobiotics Biodegradation and Metabolism	Toluene degradation	-1	1	1
K11695	'peptidoglycan pentaglycine glycine transferase (the fourth and fifth glycine) [EC:2.3.2.-]'	peptidoglycan pentaglycine glycine transferase (the fourth and fifth glycine) [EC:2.3.2.-]	peptidoglycan pentaglycine glycine transferase (the fourth and fifth glycine)	EC:2.3.2.-	Metabolism; Glycan Biosynthesis and Metabolism; Peptidoglycan biosynthesis	Metabolism	Glycan Biosynthesis and Metabolism	Peptidoglycan biosynthesis	-1	1	1
K11693	'peptidoglycan pentaglycine glycine transferase (the first glycine) [EC:2.3.2.-]'	peptidoglycan pentaglycine glycine transferase (the first glycine) [EC:2.3.2.-]	peptidoglycan pentaglycine glycine transferase (the first glycine)	EC:2.3.2.-	Metabolism; Glycan Biosynthesis and Metabolism; Peptidoglycan biosynthesis	Metabolism	Glycan Biosynthesis and Metabolism	Peptidoglycan biosynthesis	-1	1	1
K03433	'proteasome beta subunit [EC:3.4.25.1]'	proteasome beta subunit [EC:3.4.25.1]	proteasome beta subunit	EC:3.4.25.1	Metabolism; Enzyme Families; Peptidases|Genetic Information Processing; Folding, Sorting and Degradation; Proteasome	Metabolism	Enzyme Families	Peptidases	-1	1	1
K13832	'3-dehydroquinate dehydratase / shikimate dehydrogenase [EC:4.2.1.10 1.1.1.25]'	3-dehydroquinate dehydratase / shikimate dehydrogenase [EC:4.2.1.10 1.1.1.25]	3-dehydroquinate dehydratase / shikimate dehydrogenase	EC:4.2.1.10	Metabolism; Amino Acid Metabolism; Phenylalanine, tyrosine and tryptophan biosynthesis	Metabolism	Amino Acid Metabolism	Phenylalanine, tyrosine and tryptophan biosynthesis	1	0	-1
K03432	'proteasome alpha subunit [EC:3.4.25.1]'	proteasome alpha subunit [EC:3.4.25.1]	proteasome alpha subunit	EC:3.4.25.1	Metabolism; Enzyme Families; Peptidases|Genetic Information Processing; Folding, Sorting and Degradation; Proteasome	Metabolism	Enzyme Families	Peptidases	0	1	1
K11474	'GntR family transcriptional regulator, glc operon transcriptional activator'	GntR family transcriptional regulator, glc operon transcriptional activator	GntR family transcriptional regulator, glc operon transcriptional activator	0	Genetic Information Processing; Transcription; Transcription factors	Genetic Information Processing	Transcription	Transcription factors	1	0	-1
K11476	'GntR family transcriptional regulator, gluconate operon transcriptional repressor'	GntR family transcriptional regulator, gluconate operon transcriptional repressor	GntR family transcriptional regulator, gluconate operon transcriptional repressor	0	Genetic Information Processing; Transcription; Transcription factors	Genetic Information Processing	Transcription	Transcription factors	-1	1	1
K00607	'None'	None	None	0	Unclassified; Metabolism; Others	Unclassified	Metabolism	Others	1	1	1
K09650	'rhomboid-like protein [EC:3.4.21.105]'	rhomboid-like protein [EC:3.4.21.105]	rhomboid-like protein	EC:3.4.21.105	Metabolism; Enzyme Families; Peptidases	Metabolism	Enzyme Families	Peptidases	1	1	-1
K07807	'hypothetical protein NreA'	hypothetical protein NreA	hypothetical protein NreA	0	Unclassified; Poorly Characterized; Function unknown	Unclassified	Poorly Characterized	Function unknown	-1	1	1
K10253	'DOPA 4,5-dioxygenase [EC:1.14.99.-]'	DOPA 4,5-dioxygenase [EC:1.14.99.-]	DOPA 4,5-dioxygenase	EC:1.14.99.-	Unclassified; Metabolism; Biosynthesis and biodegradation of secondary metabolites	Unclassified	Metabolism	Biosynthesis and biodegradation of secondary metabolites	0	1	1
K01959	'pyruvate carboxylase subunit A [EC:6.4.1.1]'	pyruvate carboxylase subunit A [EC:6.4.1.1]	pyruvate carboxylase subunit A	EC:6.4.1.1	Metabolism; Carbohydrate Metabolism; Citrate cycle (TCA cycle)|Metabolism; Energy Metabolism; Carbon fixation pathways in prokaryotes|Metabolism; Carbohydrate Metabolism; Pyruvate metabolism	Metabolism	Carbohydrate Metabolism	Citrate cycle (TCA cycle)	1	1	1
K00141	'benzaldehyde dehydrogenase (NAD) [EC:1.2.1.28]'	benzaldehyde dehydrogenase (NAD) [EC:1.2.1.28]	benzaldehyde dehydrogenase (NAD)	EC:1.2.1.28	Metabolism; Xenobiotics Biodegradation and Metabolism; Toluene degradation|Metabolism; Xenobiotics Biodegradation and Metabolism; Xylene degradation|Metabolism; Xenobiotics Biodegradation and Metabolism; Aminobenzoate degradation	Metabolism	Xenobiotics Biodegradation and Metabolism	Toluene degradation	1	1	1
K04712	'sphingolipid delta-4 desaturase [EC:1.14.-.-]'	sphingolipid delta-4 desaturase [EC:1.14.-.-]	sphingolipid delta-4 desaturase	EC:1.14.-.-	Metabolism; Lipid Metabolism; Lipid biosynthesis proteins|Metabolism; Lipid Metabolism; Sphingolipid metabolism	Metabolism	Lipid Metabolism	Lipid biosynthesis proteins	1	1	-1
K13815	'two-component system, response regulator RpfG'	two-component system, response regulator RpfG	two-component system, response regulator RpfG	0	Environmental Information Processing; Signal Transduction; Two-component system	Environmental Information Processing	Signal Transduction	Two-component system	1	1	-1
K02803	'PTS system, N-acetylglucosamine-specific IIB component [EC:2.7.1.69]'	PTS system, N-acetylglucosamine-specific IIB component [EC:2.7.1.69]	PTS system, N-acetylglucosamine-specific IIB component	EC:2.7.1.69	Metabolism; Carbohydrate Metabolism; Amino sugar and nucleotide sugar metabolism|Environmental Information Processing; Membrane Transport; Phosphotransferase system (PTS)|Environmental Information Processing; Membrane Transport; Transporters	Metabolism	Carbohydrate Metabolism	Amino sugar and nucleotide sugar metabolism	0	1	1
K10233	'alpha-glucoside transport system permease protein'	alpha-glucoside transport system permease protein	alpha-glucoside transport system permease protein	0	Environmental Information Processing; Membrane Transport; ABC transporters|Environmental Information Processing; Membrane Transport; Transporters	Environmental Information Processing	Membrane Transport	ABC transporters	0	1	1
K10232	'alpha-glucoside transport system substrate-binding protein'	alpha-glucoside transport system substrate-binding protein	alpha-glucoside transport system substrate-binding protein	0	Environmental Information Processing; Membrane Transport; ABC transporters|Environmental Information Processing; Membrane Transport; Transporters	Environmental Information Processing	Membrane Transport	ABC transporters	0	1	1
K10235	'alpha-glucoside transport system ATP-binding protein'	alpha-glucoside transport system ATP-binding protein	alpha-glucoside transport system ATP-binding protein	0	Environmental Information Processing; Membrane Transport; ABC transporters|Environmental Information Processing; Membrane Transport; Transporters	Environmental Information Processing	Membrane Transport	ABC transporters	0	1	1
K10234	'alpha-glucoside transport system permease protein'	alpha-glucoside transport system permease protein	alpha-glucoside transport system permease protein	0	Environmental Information Processing; Membrane Transport; ABC transporters|Environmental Information Processing; Membrane Transport; Transporters	Environmental Information Processing	Membrane Transport	ABC transporters	0	1	1
K01970	'None'	None	None	0	Unclassified; Metabolism; Others	Unclassified	Metabolism	Others	-1	-1	1
K13786	'cob(II)yrinic acid a,c-diamide reductase [EC:1.16.8.1]'	cob(II)yrinic acid a,c-diamide reductase [EC:1.16.8.1]	cob(II)yrinic acid a,c-diamide reductase	EC:1.16.8.1	Metabolism; Metabolism of Cofactors and Vitamins; Porphyrin and chlorophyll metabolism	Metabolism	Metabolism of Cofactors and Vitamins	Porphyrin and chlorophyll metabolism	0	1	1
K01283	'peptidyl-dipeptidase A [EC:3.4.15.1]'	peptidyl-dipeptidase A [EC:3.4.15.1]	peptidyl-dipeptidase A	EC:3.4.15.1	Metabolism; Enzyme Families; Peptidases|Human Diseases; Infectious Diseases; Chagas disease (American trypanosomiasis)|Organismal Systems; Endocrine System; Renin-angiotensin system|Environmental Information Processing; Signaling Molecules and Interaction; Cellular antigens|Human Diseases; Cardiovascular Diseases; Hypertrophic cardiomyopathy (HCM)	Metabolism	Enzyme Families	Peptidases	1	1	-1
K14048	'urease subunit gamma/beta [EC:3.5.1.5]'	urease subunit gamma/beta [EC:3.5.1.5]	urease subunit gamma/beta	EC:3.5.1.5	Metabolism; Xenobiotics Biodegradation and Metabolism; Atrazine degradation|Human Diseases; Infectious Diseases; Epithelial cell signaling in Helicobacter pylori infection|Metabolism; Nucleotide Metabolism; Purine metabolism|Metabolism; Amino Acid Metabolism; Arginine and proline metabolism	Metabolism	Xenobiotics Biodegradation and Metabolism	Atrazine degradation	1	1	1
K14136	'phosphoribose diphosphate:decaprenyl-phosphate phosphoribosyltransferase'	phosphoribose diphosphate:decaprenyl-phosphate phosphoribosyltransferase	phosphoribose diphosphate:decaprenyl-phosphate phosphoribosyltransferase	0	Metabolism; Metabolism of Terpenoids and Polyketides; Prenyltransferases	Metabolism	Metabolism of Terpenoids and Polyketides	Prenyltransferases	1	0	-1
K03532	'trimethylamine-N-oxide reductase (cytochrome c) 1, cytochrome c-type subunit TorC'	trimethylamine-N-oxide reductase (cytochrome c) 1, cytochrome c-type subunit TorC	trimethylamine-N-oxide reductase (cytochrome c) 1, cytochrome c-type subunit TorC	0	Environmental Information Processing; Signal Transduction; Two-component system	Environmental Information Processing	Signal Transduction	Two-component system	1	1	1
K02225	'cobalamin biosynthetic protein CobC'	cobalamin biosynthetic protein CobC	cobalamin biosynthetic protein CobC	0	Metabolism; Metabolism of Cofactors and Vitamins; Porphyrin and chlorophyll metabolism	Metabolism	Metabolism of Cofactors and Vitamins	Porphyrin and chlorophyll metabolism	0	1	1
K03285	'general bacterial porin, GBP family'	general bacterial porin, GBP family	general bacterial porin, GBP family	0	Unclassified; Cellular Processes and Signaling; Pores ion channels	Unclassified	Cellular Processes and Signaling	Pores ion channels	1	1	1
K12683	'serum resistance protein'	serum resistance protein	serum resistance protein	0	Environmental Information Processing; Membrane Transport; Secretion system|Human Diseases; Infectious Diseases; Pertussis	Environmental Information Processing	Membrane Transport	Secretion system	1	0	-1
K06347	'kinase-associated protein B'	kinase-associated protein B	kinase-associated protein B	0	Environmental Information Processing; Signal Transduction; Two-component system	Environmental Information Processing	Signal Transduction	Two-component system	-1	1	1
K11337	'3-hydroxyethyl bacteriochlorophyllide a dehydrogenase [EC:1.-.-.-]'	3-hydroxyethyl bacteriochlorophyllide a dehydrogenase [EC:1.-.-.-]	3-hydroxyethyl bacteriochlorophyllide a dehydrogenase	EC:1.-.-.-	Metabolism; Metabolism of Cofactors and Vitamins; Porphyrin and chlorophyll metabolism	Metabolism	Metabolism of Cofactors and Vitamins	Porphyrin and chlorophyll metabolism	-1	1	1
K01564	'None'	None	None	0	Metabolism; Xenobiotics Biodegradation and Metabolism; Chloroalkane and chloroalkene degradation|Metabolism; Xenobiotics Biodegradation and Metabolism; Atrazine degradation	Metabolism	Xenobiotics Biodegradation and Metabolism	Chloroalkane and chloroalkene degradation	1	1	1
K05556	'hydroxylacyl-CoA dehydrogenase [EC:1.1.1.-]; ketoreductase RED1 [EC:1.1.1.-]'	hydroxylacyl-CoA dehydrogenase [EC:1.1.1.-]; ketoreductase RED1 [EC:1.1.1.-]	hydroxylacyl-CoA dehydrogenase	EC:1.1.1.-	Metabolism; Metabolism of Terpenoids and Polyketides; Biosynthesis of type II polyketide products	Metabolism	Metabolism of Terpenoids and Polyketides	Biosynthesis of type II polyketide products	1	0	-1
K05550	'benzoate 1,2-dioxygenase beta subunit [EC:1.14.12.10]'	benzoate 1,2-dioxygenase beta subunit [EC:1.14.12.10]	benzoate 1,2-dioxygenase beta subunit	EC:1.14.12.10	Metabolism; Xenobiotics Biodegradation and Metabolism; Fluorobenzoate degradation|Metabolism; Xenobiotics Biodegradation and Metabolism; Benzoate degradation	Metabolism	Xenobiotics Biodegradation and Metabolism	Fluorobenzoate degradation	1	1	1
K12306	'MFS transporter, FLVCR family, MFS-domain-containing protein 7'	MFS transporter, FLVCR family, MFS-domain-containing protein 7	MFS transporter, FLVCR family, MFS-domain-containing protein 7	0	Environmental Information Processing; Membrane Transport; Transporters	Environmental Information Processing	Membrane Transport	Transporters	1	1	1
K06139	'pyrroloquinoline quinone biosynthesis protein E'	pyrroloquinoline quinone biosynthesis protein E	pyrroloquinoline quinone biosynthesis protein E	0	Unclassified; Poorly Characterized; General function prediction only	Unclassified	Poorly Characterized	General function prediction only	0	1	1
K06135	'pyrroloquinoline quinone biosynthesis protein A'	pyrroloquinoline quinone biosynthesis protein A	pyrroloquinoline quinone biosynthesis protein A	0	Unclassified; Poorly Characterized; General function prediction only	Unclassified	Poorly Characterized	General function prediction only	0	1	1
K06136	'pyrroloquinoline quinone biosynthesis protein B'	pyrroloquinoline quinone biosynthesis protein B	pyrroloquinoline quinone biosynthesis protein B	0	Unclassified; Poorly Characterized; General function prediction only	Unclassified	Poorly Characterized	General function prediction only	0	1	1
K09977	'hypothetical protein'	hypothetical protein	hypothetical protein	0	Unclassified; Poorly Characterized; Function unknown	Unclassified	Poorly Characterized	Function unknown	0	1	1
K11437	'protein arginine N-methyltransferase 6 [EC:2.1.1.-]'	protein arginine N-methyltransferase 6 [EC:2.1.1.-]	protein arginine N-methyltransferase 6	EC:2.1.1.-	Genetic Information Processing; Replication and Repair; Chromosome	Genetic Information Processing	Replication and Repair	Chromosome	-1	-1	1
K01917	'glutathionylspermidine synthase [EC:6.3.1.8]'	glutathionylspermidine synthase [EC:6.3.1.8]	glutathionylspermidine synthase	EC:6.3.1.8	Metabolism; Metabolism of Other Amino Acids; Glutathione metabolism	Metabolism	Metabolism of Other Amino Acids	Glutathione metabolism	1	1	1
K07772	'two-component system, OmpR family, torCAD operon response regulator TorR'	two-component system, OmpR family, torCAD operon response regulator TorR	two-component system, OmpR family, torCAD operon response regulator TorR	0	Environmental Information Processing; Signal Transduction; Two-component system	Environmental Information Processing	Signal Transduction	Two-component system	0	1	1
K00207	'dihydropyrimidine dehydrogenase (NADP+) [EC:1.3.1.2]'	dihydropyrimidine dehydrogenase (NADP+) [EC:1.3.1.2]	dihydropyrimidine dehydrogenase (NADP+)	EC:1.3.1.2	Metabolism; Metabolism of Other Amino Acids; beta-Alanine metabolism|Metabolism; Nucleotide Metabolism; Pyrimidine metabolism|Metabolism; Metabolism of Cofactors and Vitamins; Pantothenate and CoA biosynthesis|Metabolism; Xenobiotics Biodegradation and Metabolism; Drug metabolism - other enzymes	Metabolism	Metabolism of Other Amino Acids	beta-Alanine metabolism	1	1	1
K13714	'bifunctional autolysin [EC:3.5.1.28 3.2.1.96]'	bifunctional autolysin [EC:3.5.1.28 3.2.1.96]	bifunctional autolysin	EC:3.5.1.28	Unclassified; Cellular Processes and Signaling; Membrane and intracellular structural molecules	Unclassified	Cellular Processes and Signaling	Membrane and intracellular structural molecules	-1	1	1
K12518	'outer membrane usher protein PapC'	outer membrane usher protein PapC	outer membrane usher protein PapC	0	Environmental Information Processing; Membrane Transport; Secretion system	Environmental Information Processing	Membrane Transport	Secretion system	0	1	1
K12519	'chaperone protein PapD'	chaperone protein PapD	chaperone protein PapD	0	Environmental Information Processing; Membrane Transport; Secretion system	Environmental Information Processing	Membrane Transport	Secretion system	0	1	1
K12517	'major pilin subunit PapA'	major pilin subunit PapA	major pilin subunit PapA	0	Environmental Information Processing; Membrane Transport; Secretion system	Environmental Information Processing	Membrane Transport	Secretion system	0	1	1
K09804	'hypothetical protein'	hypothetical protein	hypothetical protein	0	Unclassified; Poorly Characterized; Function unknown	Unclassified	Poorly Characterized	Function unknown	1	1	1
K12989	'mannosyltransferase [EC:2.4.1.-]'	mannosyltransferase [EC:2.4.1.-]	mannosyltransferase	EC:2.4.1.-	Metabolism; Glycan Biosynthesis and Metabolism; Glycosyltransferases|Metabolism; Glycan Biosynthesis and Metabolism; Lipopolysaccharide biosynthesis proteins	Metabolism	Glycan Biosynthesis and Metabolism	Glycosyltransferases	0	1	1
K12988	'alpha-1,3-rhamnosyltransferase [EC:2.4.1.-]'	alpha-1,3-rhamnosyltransferase [EC:2.4.1.-]	alpha-1,3-rhamnosyltransferase	EC:2.4.1.-	Metabolism; Glycan Biosynthesis and Metabolism; Glycosyltransferases|Metabolism; Glycan Biosynthesis and Metabolism; Lipopolysaccharide biosynthesis proteins	Metabolism	Glycan Biosynthesis and Metabolism	Glycosyltransferases	0	1	1
K06118	'UDP-sulfoquinovose synthase [EC:3.13.1.1]'	UDP-sulfoquinovose synthase [EC:3.13.1.1]	UDP-sulfoquinovose synthase	EC:3.13.1.1	Metabolism; Carbohydrate Metabolism; Amino sugar and nucleotide sugar metabolism|Metabolism; Lipid Metabolism; Glycerolipid metabolism	Metabolism	Carbohydrate Metabolism	Amino sugar and nucleotide sugar metabolism	1	0	-1
K11632	'bacitracin transport system permease protein'	bacitracin transport system permease protein	bacitracin transport system permease protein	0	Human Diseases; Infectious Diseases; Staphylococcus aureus infection|Environmental Information Processing; Membrane Transport; ABC transporters|Environmental Information Processing; Membrane Transport; Transporters|Environmental Information Processing; Signal Transduction; Two-component system	Human Diseases	Infectious Diseases	Staphylococcus aureus infection	-1	1	1
K11630	'two-component system, OmpR family, bacitracin resistance response regulator BceR'	two-component system, OmpR family, bacitracin resistance response regulator BceR	two-component system, OmpR family, bacitracin resistance response regulator BceR	0	Environmental Information Processing; Signal Transduction; Two-component system	Environmental Information Processing	Signal Transduction	Two-component system	-1	1	1
K11631	'bacitracin transport system ATP-binding protein'	bacitracin transport system ATP-binding protein	bacitracin transport system ATP-binding protein	0	Human Diseases; Infectious Diseases; Staphylococcus aureus infection|Environmental Information Processing; Membrane Transport; ABC transporters|Environmental Information Processing; Membrane Transport; Transporters|Environmental Information Processing; Signal Transduction; Two-component system	Human Diseases	Infectious Diseases	Staphylococcus aureus infection	-1	1	1
K09814	'hemin transport system ATP-binding protein [EC:3.6.3.-]'	hemin transport system ATP-binding protein [EC:3.6.3.-]	hemin transport system ATP-binding protein	EC:3.6.3.-	Environmental Information Processing; Membrane Transport; ABC transporters|Environmental Information Processing; Membrane Transport; Transporters	Environmental Information Processing	Membrane Transport	ABC transporters	-1	1	1
K09813	'hemin transport system permease protein'	hemin transport system permease protein	hemin transport system permease protein	0	Environmental Information Processing; Membrane Transport; ABC transporters|Environmental Information Processing; Membrane Transport; Transporters	Environmental Information Processing	Membrane Transport	ABC transporters	-1	1	1
K01249	'DNA glycosylase [EC:3.2.2.-]'	DNA glycosylase [EC:3.2.2.-]	DNA glycosylase	EC:3.2.2.-	Unclassified; Genetic Information Processing; Replication, recombination and repair proteins	Unclassified	Genetic Information Processing	Replication, recombination and repair proteins	1	1	1
K00220	'cyclohexadienyl dehydrogenase [EC:1.3.1.43]; cyclohexadieny/prephenate dehydrogenase [EC:1.3.1.43 1.3.1.12]'	cyclohexadienyl dehydrogenase [EC:1.3.1.43]; cyclohexadieny/prephenate dehydrogenase [EC:1.3.1.43 1.3.1.12]	cyclohexadienyl dehydrogenase	EC:1.3.1.43	Metabolism; Amino Acid Metabolism; Phenylalanine, tyrosine and tryptophan biosynthesis|Metabolism; Biosynthesis of Other Secondary Metabolites; Novobiocin biosynthesis	Metabolism	Amino Acid Metabolism	Phenylalanine, tyrosine and tryptophan biosynthesis	1	1	1
K12538	'outer membrane protein HasF'	outer membrane protein HasF	outer membrane protein HasF	0	Environmental Information Processing; Membrane Transport; Secretion system	Environmental Information Processing	Membrane Transport	Secretion system	0	1	1
K12536	'ATP-binding cassette, subfamily C, bacterial HasD'	ATP-binding cassette, subfamily C, bacterial HasD	ATP-binding cassette, subfamily C, bacterial HasD	0	Environmental Information Processing; Membrane Transport; Secretion system	Environmental Information Processing	Membrane Transport	Secretion system	1	1	1
K12537	'protease secretion protein HasE'	protease secretion protein HasE	protease secretion protein HasE	0	Environmental Information Processing; Membrane Transport; Secretion system	Environmental Information Processing	Membrane Transport	Secretion system	0	1	1
K10975	'allantoin permease'	allantoin permease	allantoin permease	0	Unclassified; Cellular Processes and Signaling; Other ion-coupled transporters	Unclassified	Cellular Processes and Signaling	Other ion-coupled transporters	1	1	1
K00315	'dimethylglycine dehydrogenase [EC:1.5.99.2]'	dimethylglycine dehydrogenase [EC:1.5.99.2]	dimethylglycine dehydrogenase	EC:1.5.99.2	Metabolism; Amino Acid Metabolism; Glycine, serine and threonine metabolism	Metabolism	Amino Acid Metabolism	Glycine, serine and threonine metabolism	0	1	1
K09860	'hypothetical protein'	hypothetical protein	hypothetical protein	0	Unclassified; Poorly Characterized; Function unknown	Unclassified	Poorly Characterized	Function unknown	1	1	1
K10020	'octopine/nopaline transport system permease protein'	octopine/nopaline transport system permease protein	octopine/nopaline transport system permease protein	0	Environmental Information Processing; Membrane Transport; ABC transporters|Environmental Information Processing; Membrane Transport; Transporters	Environmental Information Processing	Membrane Transport	ABC transporters	0	1	1
K10022	'arginine/ornithine transport system substrate-binding protein'	arginine/ornithine transport system substrate-binding protein	arginine/ornithine transport system substrate-binding protein	0	Environmental Information Processing; Membrane Transport; ABC transporters|Environmental Information Processing; Membrane Transport; Transporters	Environmental Information Processing	Membrane Transport	ABC transporters	-1	1	1
K10023	'arginine/ornithine transport system permease protein'	arginine/ornithine transport system permease protein	arginine/ornithine transport system permease protein	0	Environmental Information Processing; Membrane Transport; ABC transporters|Environmental Information Processing; Membrane Transport; Transporters	Environmental Information Processing	Membrane Transport	ABC transporters	0	1	1
K10024	'arginine/ornithine transport system permease protein'	arginine/ornithine transport system permease protein	arginine/ornithine transport system permease protein	0	Environmental Information Processing; Membrane Transport; ABC transporters|Environmental Information Processing; Membrane Transport; Transporters	Environmental Information Processing	Membrane Transport	ABC transporters	0	1	1
K10025	'arginine/ornithine transport system ATP-binding protein [EC:3.6.3.-]'	arginine/ornithine transport system ATP-binding protein [EC:3.6.3.-]	arginine/ornithine transport system ATP-binding protein	EC:3.6.3.-	Environmental Information Processing; Membrane Transport; ABC transporters|Environmental Information Processing; Membrane Transport; Transporters	Environmental Information Processing	Membrane Transport	ABC transporters	0	1	1
K01477	'allantoicase [EC:3.5.3.4]'	allantoicase [EC:3.5.3.4]	allantoicase	EC:3.5.3.4	Metabolism; Nucleotide Metabolism; Purine metabolism	Metabolism	Nucleotide Metabolism	Purine metabolism	0	1	1
K03302	'anaerobic C4-dicarboxylate transporter, Dcu family'	anaerobic C4-dicarboxylate transporter, Dcu family	anaerobic C4-dicarboxylate transporter, Dcu family	0	Unclassified; Cellular Processes and Signaling; Other ion-coupled transporters	Unclassified	Cellular Processes and Signaling	Other ion-coupled transporters	-1	1	1
K10565	'chemotaxis protein MotD'	chemotaxis protein MotD	chemotaxis protein MotD	0	Cellular Processes; Cell Motility; Flagellar assembly	Cellular Processes	Cell Motility	Flagellar assembly	0	1	1
K10564	'chemotaxis protein MotC'	chemotaxis protein MotC	chemotaxis protein MotC	0	Cellular Processes; Cell Motility; Flagellar assembly	Cellular Processes	Cell Motility	Flagellar assembly	0	1	1
K07228	'TrkA domain protein'	TrkA domain protein	TrkA domain protein	0	Unclassified; Cellular Processes and Signaling; Inorganic ion transport and metabolism	Unclassified	Cellular Processes and Signaling	Inorganic ion transport and metabolism	1	1	-1
K00028	'malate dehydrogenase (decarboxylating) [EC:1.1.1.39]'	malate dehydrogenase (decarboxylating) [EC:1.1.1.39]	malate dehydrogenase (decarboxylating)	EC:1.1.1.39	Metabolism; Energy Metabolism; Carbon fixation in photosynthetic organisms|Metabolism; Carbohydrate Metabolism; Pyruvate metabolism	Metabolism	Energy Metabolism	Carbon fixation in photosynthetic organisms	1	1	1
K12552	'penicillin-binding protein 1 [EC:3.4.-.-]'	penicillin-binding protein 1 [EC:3.4.-.-]	penicillin-binding protein 1	EC:3.4.-.-	Metabolism; Glycan Biosynthesis and Metabolism; Peptidoglycan biosynthesis	Metabolism	Glycan Biosynthesis and Metabolism	Peptidoglycan biosynthesis	-1	1	1
K12553	'penicillin-binding protein 3 [EC:3.4.-.-]'	penicillin-binding protein 3 [EC:3.4.-.-]	penicillin-binding protein 3	EC:3.4.-.-	Metabolism; Glycan Biosynthesis and Metabolism; Peptidoglycan biosynthesis	Metabolism	Glycan Biosynthesis and Metabolism	Peptidoglycan biosynthesis	-1	1	1
K12551	'transglycosylase [EC:2.4.1.-]'	transglycosylase [EC:2.4.1.-]	transglycosylase	EC:2.4.1.-	Metabolism; Glycan Biosynthesis and Metabolism; Glycosyltransferases|Metabolism; Glycan Biosynthesis and Metabolism; Peptidoglycan biosynthesis	Metabolism	Glycan Biosynthesis and Metabolism	Glycosyltransferases	-1	1	1
K10954	'zona occludens toxin'	zona occludens toxin	zona occludens toxin	0	Human Diseases; Infectious Diseases; Vibrio cholerae infection|Environmental Information Processing; Signaling Molecules and Interaction; Bacterial toxins	Human Diseases	Infectious Diseases	Vibrio cholerae infection	1	1	1
K00499	'choline monooxygenase [EC:1.14.15.7]'	choline monooxygenase [EC:1.14.15.7]	choline monooxygenase	EC:1.14.15.7	Metabolism; Amino Acid Metabolism; Glycine, serine and threonine metabolism	Metabolism	Amino Acid Metabolism	Glycine, serine and threonine metabolism	1	1	1
K00496	'alkane 1-monooxygenase [EC:1.14.15.3]'	alkane 1-monooxygenase [EC:1.14.15.3]	alkane 1-monooxygenase	EC:1.14.15.3	Metabolism; Lipid Metabolism; Fatty acid metabolism	Metabolism	Lipid Metabolism	Fatty acid metabolism	1	0	-1
K00491	'nitric-oxide synthase, bacterial [EC:1.14.13.39]'	nitric-oxide synthase, bacterial [EC:1.14.13.39]	nitric-oxide synthase, bacterial	EC:1.14.13.39	Metabolism; Amino Acid Metabolism; Arginine and proline metabolism	Metabolism	Amino Acid Metabolism	Arginine and proline metabolism	-1	1	1
K00493	'unspecific monooxygenase [EC:1.14.14.1]'	unspecific monooxygenase [EC:1.14.14.1]	unspecific monooxygenase	EC:1.14.14.1	Metabolism; Xenobiotics Biodegradation and Metabolism; Aminobenzoate degradation|Metabolism; Amino Acid Metabolism; Tryptophan metabolism|Metabolism; Lipid Metabolism; Fatty acid metabolism	Metabolism	Xenobiotics Biodegradation and Metabolism	Aminobenzoate degradation	1	1	1
K07055	'; tRNA wybutosine-synthesizing protein 2 [EC:2.1.1.-]'	; tRNA wybutosine-synthesizing protein 2 [EC:2.1.1.-]	; tRNA wybutosine-synthesizing protein 2	EC:2.1.1.-	Unclassified; Poorly Characterized; General function prediction only	Unclassified	Poorly Characterized	General function prediction only	-1	-1	1
K07059	'None'	None	None	0	Unclassified; Poorly Characterized; General function prediction only	Unclassified	Poorly Characterized	General function prediction only	0	1	1
K01454	'None'	None	None	0	Unclassified; Metabolism; Others	Unclassified	Metabolism	Others	0	1	1
K04756	'alkyl hydroperoxide reductase subunit D'	alkyl hydroperoxide reductase subunit D	alkyl hydroperoxide reductase subunit D	0	Unclassified; Poorly Characterized; Function unknown	Unclassified	Poorly Characterized	Function unknown	1	1	-1
K10810	'transcriptional regulator TenI'	transcriptional regulator TenI	transcriptional regulator TenI	0	Genetic Information Processing; Transcription; Transcription factors	Genetic Information Processing	Transcription	Transcription factors	-1	1	1
K10725	'archaeal cell division control protein 6'	archaeal cell division control protein 6	archaeal cell division control protein 6	0	Genetic Information Processing; Replication and Repair; DNA replication proteins	Genetic Information Processing	Replication and Repair	DNA replication proteins	-1	-1	1
K08295	'2-aminobenzoate-CoA ligase [EC:6.2.1.32]'	2-aminobenzoate-CoA ligase [EC:6.2.1.32]	2-aminobenzoate-CoA ligase	EC:6.2.1.32	Metabolism; Xenobiotics Biodegradation and Metabolism; Aminobenzoate degradation	Metabolism	Xenobiotics Biodegradation and Metabolism	Aminobenzoate degradation	1	1	1
K14584	'2-hydroxychromene-2-carboxylate isomerase [EC:5.99.1.4]'	2-hydroxychromene-2-carboxylate isomerase [EC:5.99.1.4]	2-hydroxychromene-2-carboxylate isomerase	EC:5.99.1.4	Metabolism; Xenobiotics Biodegradation and Metabolism; Naphthalene degradation	Metabolism	Xenobiotics Biodegradation and Metabolism	Naphthalene degradation	1	1	1
K09190	'hypothetical protein'	hypothetical protein	hypothetical protein	0	Unclassified; Poorly Characterized; Function unknown	Unclassified	Poorly Characterized	Function unknown	1	1	1
K14749	'ethylbenzene dioxygenase beta subunit [EC:1.14.12.-]'	ethylbenzene dioxygenase beta subunit [EC:1.14.12.-]	ethylbenzene dioxygenase beta subunit	EC:1.14.12.-	None	None	0	0	1	1	1
K14743	'membrane-anchored mycosin MYCP [EC:3.4.21.-]'	membrane-anchored mycosin MYCP [EC:3.4.21.-]	membrane-anchored mycosin MYCP	EC:3.4.21.-	None	None	0	0	1	0	-1
K02164	'nitric-oxide reductase NorE protein [EC:1.7.99.7]; nitric oxide reductase NorE protein'	nitric-oxide reductase NorE protein [EC:1.7.99.7]; nitric oxide reductase NorE protein	nitric-oxide reductase NorE protein	EC:1.7.99.7	Metabolism; Energy Metabolism; Nitrogen metabolism	Metabolism	Energy Metabolism	Nitrogen metabolism	0	1	1
K07268	'opacity associated protein'	opacity associated protein	opacity associated protein	0	Unclassified; Cellular Processes and Signaling; Membrane and intracellular structural molecules	Unclassified	Cellular Processes and Signaling	Membrane and intracellular structural molecules	1	1	1
K04478	'monofunctional glycosyltransferase [EC:2.4.1.-]'	monofunctional glycosyltransferase [EC:2.4.1.-]	monofunctional glycosyltransferase	EC:2.4.1.-	Metabolism; Glycan Biosynthesis and Metabolism; Glycosyltransferases|Metabolism; Glycan Biosynthesis and Metabolism; Peptidoglycan biosynthesis	Metabolism	Glycan Biosynthesis and Metabolism	Glycosyltransferases	-1	1	1
K08261	'D-sorbitol dehydrogenase (acceptor) [EC:1.1.99.21]'	D-sorbitol dehydrogenase (acceptor) [EC:1.1.99.21]	D-sorbitol dehydrogenase (acceptor)	EC:1.1.99.21	Metabolism; Carbohydrate Metabolism; Fructose and mannose metabolism	Metabolism	Carbohydrate Metabolism	Fructose and mannose metabolism	0	1	1
K02572	'ferredoxin-type protein NapF'	ferredoxin-type protein NapF	ferredoxin-type protein NapF	0	Metabolism; Energy Metabolism; Nitrogen metabolism	Metabolism	Energy Metabolism	Nitrogen metabolism	1	1	1
K01143	'exodeoxyribonuclease (lambda-induced) [EC:3.1.11.3]'	exodeoxyribonuclease (lambda-induced) [EC:3.1.11.3]	exodeoxyribonuclease (lambda-induced)	EC:3.1.11.3	Unclassified; Genetic Information Processing; Replication, recombination and repair proteins	Unclassified	Genetic Information Processing	Replication, recombination and repair proteins	1	1	1
K13238	'3,2-trans-enoyl-CoA isomerase, mitochondrial [EC:5.3.3.8]'	3,2-trans-enoyl-CoA isomerase, mitochondrial [EC:5.3.3.8]	3,2-trans-enoyl-CoA isomerase, mitochondrial	EC:5.3.3.8	Metabolism; Lipid Metabolism; Fatty acid metabolism	Metabolism	Lipid Metabolism	Fatty acid metabolism	1	1	-1
K13797	'DNA-directed RNA polymerase subunit beta-beta'' [EC:2.7.7.6]'	DNA-directed RNA polymerase subunit beta-beta' [EC:2.7.7.6]	DNA-directed RNA polymerase subunit beta-beta'	EC:2.7.7.6	Metabolism; Nucleotide Metabolism; Pyrimidine metabolism|Genetic Information Processing; Transcription; Transcription machinery|Genetic Information Processing; Replication and Repair; DNA repair and recombination proteins|Metabolism; Nucleotide Metabolism; Purine metabolism|Genetic Information Processing; Transcription; RNA polymerase	Metabolism	Nucleotide Metabolism	Pyrimidine metabolism	1	1	1
K09944	'hypothetical protein'	hypothetical protein	hypothetical protein	0	Unclassified; Poorly Characterized; Function unknown	Unclassified	Poorly Characterized	Function unknown	1	1	1
K09947	'hypothetical protein'	hypothetical protein	hypothetical protein	0	Unclassified; Poorly Characterized; Function unknown	Unclassified	Poorly Characterized	Function unknown	1	1	1
K10851	'nitrogen regulatory protein A'	nitrogen regulatory protein A	nitrogen regulatory protein A	0	Environmental Information Processing; Signal Transduction; Two-component system	Environmental Information Processing	Signal Transduction	Two-component system	-1	1	1
K10850	'MFS transporter, NNP family, putative nitrate transporter'	MFS transporter, NNP family, putative nitrate transporter	MFS transporter, NNP family, putative nitrate transporter	0	Environmental Information Processing; Membrane Transport; Transporters|Environmental Information Processing; Signal Transduction; Two-component system	Environmental Information Processing	Membrane Transport	Transporters	-1	1	1
K14974	'6-hydroxynicotinate 3-monooxygenase [EC:1.14.13.114]'	6-hydroxynicotinate 3-monooxygenase [EC:1.14.13.114]	6-hydroxynicotinate 3-monooxygenase	EC:1.14.13.114	None	None	0	0	1	1	1
K00590	'site-specific DNA-methyltransferase (cytosine-N4-specific) [EC:2.1.1.113]'	site-specific DNA-methyltransferase (cytosine-N4-specific) [EC:2.1.1.113]	site-specific DNA-methyltransferase (cytosine-N4-specific)	EC:2.1.1.113	Unclassified; Genetic Information Processing; Replication, recombination and repair proteins	Unclassified	Genetic Information Processing	Replication, recombination and repair proteins	-1	-1	1
K07653	'two-component system, OmpR family, sensor histidine kinase MprB [EC:2.7.13.3]'	two-component system, OmpR family, sensor histidine kinase MprB [EC:2.7.13.3]	two-component system, OmpR family, sensor histidine kinase MprB	EC:2.7.13.3	Metabolism; Enzyme Families; Protein kinases|Environmental Information Processing; Signal Transduction; Two-component system	Metabolism	Enzyme Families	Protein kinases	1	0	-1
K00561	'23S rRNA (adenine2085-N6)-dimethyltransferase [EC:2.1.1.184]; rRNA (adenine-N6-)-methyltransferase [EC:2.1.1.48]'	23S rRNA (adenine2085-N6)-dimethyltransferase [EC:2.1.1.184]; rRNA (adenine-N6-)-methyltransferase [EC:2.1.1.48]	23S rRNA (adenine2085-N6)-dimethyltransferase	EC:2.1.1.184	Unclassified; Genetic Information Processing; Translation proteins	Unclassified	Genetic Information Processing	Translation proteins	1	1	1
K01167	'ribonuclease T1 [EC:3.1.27.3]'	ribonuclease T1 [EC:3.1.27.3]	ribonuclease T1	EC:3.1.27.3	Unclassified; Genetic Information Processing; Translation proteins	Unclassified	Genetic Information Processing	Translation proteins	1	1	1
K12255	'guanidinobutyrase [EC:3.5.3.7]'	guanidinobutyrase [EC:3.5.3.7]	guanidinobutyrase	EC:3.5.3.7	Metabolism; Amino Acid Metabolism; Arginine and proline metabolism	Metabolism	Amino Acid Metabolism	Arginine and proline metabolism	0	1	1
K12254	'4-guanidinobutyraldehyde dehydrogenase / NAD-dependent aldehyde dehydrogenase [EC:1.2.1.54 1.2.1.-]'	4-guanidinobutyraldehyde dehydrogenase / NAD-dependent aldehyde dehydrogenase [EC:1.2.1.54 1.2.1.-]	4-guanidinobutyraldehyde dehydrogenase / NAD-dependent aldehyde dehydrogenase	EC:1.2.1.54	Metabolism; Amino Acid Metabolism; Arginine and proline metabolism	Metabolism	Amino Acid Metabolism	Arginine and proline metabolism	-1	1	1
K12252	'arginine:pyruvate transaminase [EC:2.6.1.84]'	arginine:pyruvate transaminase [EC:2.6.1.84]	arginine:pyruvate transaminase	EC:2.6.1.84	Metabolism; Amino Acid Metabolism; Amino acid related enzymes|Metabolism; Amino Acid Metabolism; Arginine and proline metabolism	Metabolism	Amino Acid Metabolism	Amino acid related enzymes	0	1	1
K12070	'conjugal transfer pilus assembly protein TraI'	conjugal transfer pilus assembly protein TraI	conjugal transfer pilus assembly protein TraI	0	Environmental Information Processing; Membrane Transport; Secretion system	Environmental Information Processing	Membrane Transport	Secretion system	1	1	1
K02829	'cytochrome aa3-600 menaquinol oxidase subunit IV [EC:1.10.3.12]; quinol oxidase polypeptide IV [EC:1.9.3.-]'	cytochrome aa3-600 menaquinol oxidase subunit IV [EC:1.10.3.12]; quinol oxidase polypeptide IV [EC:1.9.3.-]	cytochrome aa3-600 menaquinol oxidase subunit IV	EC:1.10.3.12	Metabolism; Energy Metabolism; Oxidative phosphorylation	Metabolism	Energy Metabolism	Oxidative phosphorylation	-1	1	1
K02827	'quinol oxidase polypeptide I [EC:1.9.3.-]; cytochrome aa3-600 menaquinol oxidase subunit I [EC:1.10.3.12]'	quinol oxidase polypeptide I [EC:1.9.3.-]; cytochrome aa3-600 menaquinol oxidase subunit I [EC:1.10.3.12]	quinol oxidase polypeptide I	EC:1.9.3.-	Metabolism; Energy Metabolism; Oxidative phosphorylation	Metabolism	Energy Metabolism	Oxidative phosphorylation	-1	1	1
K02826	'cytochrome aa3-600 menaquinol oxidase subunit II [EC:1.10.3.12]; quinol oxidase polypeptide II [EC:1.9.3.-]'	cytochrome aa3-600 menaquinol oxidase subunit II [EC:1.10.3.12]; quinol oxidase polypeptide II [EC:1.9.3.-]	cytochrome aa3-600 menaquinol oxidase subunit II	EC:1.10.3.12	Metabolism; Energy Metabolism; Oxidative phosphorylation	Metabolism	Energy Metabolism	Oxidative phosphorylation	-1	1	1
K01406	'serralysin [EC:3.4.24.40]'	serralysin [EC:3.4.24.40]	serralysin	EC:3.4.24.40	Metabolism; Enzyme Families; Peptidases	Metabolism	Enzyme Families	Peptidases	-1	1	1

## Sheet: Cat 1
This sheet contains the data of the statistically different PiCrust Data (normalized) belonging to Category 1
KO ID	Name	KEGG_Description	Protein	EC	KEGG_Pathways	KEGG_Pathways_1	KEGG_Pathways_2	KEGG_Pathways_3	Comparison Age8 - Age 18	Comparison Age8 - Age 24	Comparison Age18 - Age 24	Age 8	Age 8	Age 8	Age 8	Age 8	Age 8	Age 8	Age 8	Age 8	Age 8	Age 18	Age 18	Age 18	Age 18	Age 18	Age 18	Age 18	Age 18	Age 18	Age 18	Age 20	Age 20	Age 20	Age 20	Age 20	Age 20	Age 20	Age 20	Age 20	Age 20	Age 22	Age 22	Age 22	Age 22	Age 22	Age 22	Age 22	Age 22
K05597	glutamin-(asparagin-)ase [EC:3.5.1.38]	glutamin-(asparagin-)ase [EC:3.5.1.38]	glutamin-(asparagin-)ase	EC:3.5.1.38	Metabolism; Amino Acid Metabolism; Arginine and proline metabolism|Metabolism; Metabolism of Other Amino Acids; D-Glutamine and D-glutamate metabolism|Metabolism; Amino Acid Metabolism; Alanine, aspartate and glutamate metabolism|Metabolism; Energy Metabolism; Nitrogen metabolism	Metabolism	Amino Acid Metabolism	Arginine and proline metabolism	1	1	1	1.27503e-08	0	0	0	1.05707e-08	0	0	0	0	0	0	0	1.09115e-08	4.67992e-08	0	0	8.50386e-09	2.57344e-08	0	0	0	1.78886e-08	0	0	0	0	0	7.78177e-09	0	0	0	0	0	0	0	0	0	1.00284e-08
K05927	quinone-reactive Ni/Fe-hydrogenase small subunit [EC:1.12.5.1]	quinone-reactive Ni/Fe-hydrogenase small subunit [EC:1.12.5.1]	quinone-reactive Ni/Fe-hydrogenase small subunit	EC:1.12.5.1	Unclassified; Metabolism; Energy metabolism	Unclassified	Metabolism	Energy metabolism	1	1	1	0	0	0	0	0	0	0	0	0	0	0	0	0	0	2.41903e-07	1.53477e-08	2.55116e-08	0	1.23177e-07	1.14942e-07	0	1.96774e-07	1.41466e-08	9.09542e-07	9.57353e-07	1.05641e-06	2.90517e-06	6.53669e-07	0	0	0	6.00113e-09	0	0	1.37165e-08	0	0	0
K05922	quinone-reactive Ni/Fe-hydrogenase large subunit [EC:1.12.5.1]	quinone-reactive Ni/Fe-hydrogenase large subunit [EC:1.12.5.1]	quinone-reactive Ni/Fe-hydrogenase large subunit	EC:1.12.5.1	Unclassified; Metabolism; Energy metabolism	Unclassified	Metabolism	Energy metabolism	1	1	1	0	0	0	0	0	0	0	0	0	0	0	0	0	0	1.2621e-07	0	1.70077e-08	0	6.71874e-08	5.7471e-08	0	1.07331e-07	0	4.54771e-07	4.78677e-07	5.23358e-07	1.45258e-06	3.26834e-07	0	0	0	0	0	0	0	0	0	0
K01347	IgA-specific serine endopeptidase [EC:3.4.21.72]	IgA-specific serine endopeptidase [EC:3.4.21.72]	IgA-specific serine endopeptidase	EC:3.4.21.72	Environmental Information Processing; Membrane Transport; Secretion system|Metabolism; Enzyme Families; Peptidases	Environmental Information Processing	Membrane Transport	Secretion system	1	1	1	0	0	0	0	0	0	0	0	0	0	0	0	1.09115e-08	0	0	0	0	1.28672e-08	0	0	0	0	0	0	0	0	0	0	7.24216e-09	9.60589e-09	8.86264e-09	0	1.67492e-08	0	0	0	0	0
K08693	3-nucleotidase [EC:3.1.3.6]	3'-nucleotidase [EC:3.1.3.6]	3'-nucleotidase	EC:3.1.3.6	Metabolism; Nucleotide Metabolism; Pyrimidine metabolism|Metabolism; Nucleotide Metabolism; Purine metabolism	Metabolism	Nucleotide Metabolism	Pyrimidine metabolism	1	1	1	0	0	0	0	0	0	0	0	0	0	0	0	0	0	4.207e-08	0	0	1.28672e-08	1.11979e-08	1.14942e-08	0	0	0	0	1.49586e-08	0	0	0	7.24216e-09	9.60589e-09	8.86264e-09	0	0	0	0	0	1.64863e-08	0
K08690	cis-2,3-dihydrobiphenyl-2,3-diol dehydrogenase [EC:1.3.1.56]	cis-2,3-dihydrobiphenyl-2,3-diol dehydrogenase [EC:1.3.1.56]	cis-2,3-dihydrobiphenyl-2,3-diol dehydrogenase	EC:1.3.1.56	Metabolism; Xenobiotics Biodegradation and Metabolism; Dioxin degradation	Metabolism	Xenobiotics Biodegradation and Metabolism	Dioxin degradation	1	1	1	1.27503e-08	0	0	0	0	0	0	0	0	0	0	0	1.09115e-08	4.67992e-08	0	0	8.50386e-09	2.57344e-08	0	0	0	0	0	0	0	0	0	0	0	0	0	0	0	0	0	0	0	1.00284e-08
K11740	bacteriophage N4 adsorption protein B	bacteriophage N4 adsorption protein B	bacteriophage N4 adsorption protein B	0	Unclassified; Poorly Characterized; General function prediction only	Unclassified	Poorly Characterized	General function prediction only	1	1	1	1.27503e-08	0	0	0	0	0	0	0	0	0	0	0	1.09115e-08	4.67992e-08	0	0	8.50386e-09	2.57344e-08	0	0	0	0	1.41466e-08	0	0	0	0	0	0	0	0	0	0	0	0	0	0	1.00284e-08
K09929	hypothetical protein	hypothetical protein	hypothetical protein	0	Unclassified; Poorly Characterized; Function unknown	Unclassified	Poorly Characterized	Function unknown	1	1	1	0	0	0	0	1.05707e-08	0	0	0	0	0	0	0	0	2.33996e-08	0	0	8.50386e-09	1.28672e-08	0	0	0	0	0	0	0	0	0	0	7.24216e-09	0	0	0	0	0	1.37165e-08	0	0	0
K06945	None	None	None	0	Unclassified; Poorly Characterized; General function prediction only	Unclassified	Poorly Characterized	General function prediction only	1	1	1	1.27503e-08	0	0	0	0	0	0	0	0	0	0	0	1.09115e-08	4.67992e-08	0	0	8.50386e-09	2.57344e-08	0	0	0	0	0	0	0	0	0	0	0	0	0	0	0	0	0	0	0	1.00284e-08
K13573	proteasome accessory factor C	proteasome accessory factor C	proteasome accessory factor C	0	Unclassified; Genetic Information Processing; Protein folding and associated processing	Unclassified	Genetic Information Processing	Protein folding and associated processing	1	1	1	0	0	0	0	0	0	0	0	0	0	0	0	0	0	2.1035e-08	0	0	0	0	0	0	0	1.41466e-08	0	0	0	0	0	0	0	0	0	0	0	0	0	0	1.00284e-08
K06986	None	None	None	0	Unclassified; Poorly Characterized; General function prediction only	Unclassified	Poorly Characterized	General function prediction only	1	1	1	0	1.68604e-08	0	0	0	0	0	0	0	0	0	1.94043e-08	0	0	3.15525e-08	0	8.50386e-09	1.28672e-08	0	0	0	0	1.41466e-08	1.5159e-08	0	9.69181e-09	0	7.78177e-09	0	9.60589e-09	0	0	0	0	0	0	0	1.00284e-08
K02182	crotonobetaine/carnitine-CoA ligase [EC:6.2.1.-]	crotonobetaine/carnitine-CoA ligase [EC:6.2.1.-]	crotonobetaine/carnitine-CoA ligase	EC:6.2.1.-	Unclassified; Metabolism; Others	Unclassified	Metabolism	Others	1	1	1	0	0	0	0	0	0	0	0	0	0	0	0	0	0	0	0	8.50386e-09	0	0	0	0	0	0	0	1.49586e-08	0	0	1.55635e-08	7.24216e-09	3.84236e-08	0	0	0	0	0	0	0	0
K08721	multidrug resistance outer membrane protein OprJ	multidrug resistance outer membrane protein OprJ	multidrug resistance outer membrane protein OprJ	0	Unclassified; Cellular Processes and Signaling; Pores ion channels	Unclassified	Cellular Processes and Signaling	Pores ion channels	1	1	1	1.27503e-08	0	0	0	0	0	0	0	0	0	0	0	1.09115e-08	4.67992e-08	0	0	1.70077e-08	2.57344e-08	0	0	0	1.78886e-08	0	0	1.49586e-08	9.69181e-09	0	7.78177e-09	0	9.60589e-09	0	0	0	0	0	0	0	1.00284e-08
K04110	benzoate-CoA ligase [EC:6.2.1.25]	benzoate-CoA ligase [EC:6.2.1.25]	benzoate-CoA ligase	EC:6.2.1.25	Metabolism; Xenobiotics Biodegradation and Metabolism; Aminobenzoate degradation|Metabolism; Xenobiotics Biodegradation and Metabolism; Benzoate degradation	Metabolism	Xenobiotics Biodegradation and Metabolism	Aminobenzoate degradation	1	1	1	1.27503e-08	0	0	0	0	0	0	0	0	0	0	0	1.09115e-08	4.67992e-08	0	0	1.70077e-08	2.57344e-08	0	0	0	1.78886e-08	0	0	1.49586e-08	0	0	7.78177e-09	0	9.60589e-09	0	0	0	0	0	0	0	1.00284e-08
K01707	5-dehydro-4-deoxyglucarate dehydratase [EC:4.2.1.41]	5-dehydro-4-deoxyglucarate dehydratase [EC:4.2.1.41]	5-dehydro-4-deoxyglucarate dehydratase	EC:4.2.1.41	Metabolism; Carbohydrate Metabolism; Ascorbate and aldarate metabolism	Metabolism	Carbohydrate Metabolism	Ascorbate and aldarate metabolism	1	1	1	1.27503e-08	0	0	0	0	1.08042e-08	0	0	0	0	0	0	1.09115e-08	7.01987e-08	0	0	1.70077e-08	2.57344e-08	0	0	0	1.78886e-08	0	0	0	0	0	0	0	0	0	0	0	0	0	0	1.64863e-08	1.00284e-08
K06860	None	None	None	0	Unclassified; Poorly Characterized; General function prediction only	Unclassified	Poorly Characterized	General function prediction only	1	1	1	0	1.68604e-08	0	1.17334e-08	0	0	0	0	0	0	0	1.94043e-08	0	0	3.15525e-08	0	8.50386e-09	1.28672e-08	0	0	0	0	1.41466e-08	1.5159e-08	0	0	0	7.78177e-09	0	9.60589e-09	0	0	0	0	0	2.99643e-08	0	2.00568e-08
K10228	sorbitol/mannitol transport system permease protein	sorbitol/mannitol transport system permease protein	sorbitol/mannitol transport system permease protein	0	Environmental Information Processing; Membrane Transport; ABC transporters|Environmental Information Processing; Membrane Transport; Transporters	Environmental Information Processing	Membrane Transport	ABC transporters	1	1	1	1.27503e-08	0	0	0	0	0	0	0	0	0	0	0	1.09115e-08	4.67992e-08	0	0	8.50386e-09	2.57344e-08	0	0	0	1.78886e-08	0	0	0	0	0	7.78177e-09	0	0	1.77253e-08	0	0	0	0	0	1.64863e-08	1.00284e-08
K10229	sorbitol/mannitol transport system permease protein	sorbitol/mannitol transport system permease protein	sorbitol/mannitol transport system permease protein	0	Environmental Information Processing; Membrane Transport; ABC transporters|Environmental Information Processing; Membrane Transport; Transporters	Environmental Information Processing	Membrane Transport	ABC transporters	1	1	1	1.27503e-08	0	0	0	0	0	0	0	0	0	0	0	1.09115e-08	4.67992e-08	0	0	8.50386e-09	2.57344e-08	0	0	0	1.78886e-08	0	0	0	0	0	7.78177e-09	0	0	1.77253e-08	0	0	0	0	0	0	1.00284e-08
K10227	sorbitol/mannitol transport system substrate-binding protein	sorbitol/mannitol transport system substrate-binding protein	sorbitol/mannitol transport system substrate-binding protein	0	Environmental Information Processing; Membrane Transport; ABC transporters|Environmental Information Processing; Membrane Transport; Transporters	Environmental Information Processing	Membrane Transport	ABC transporters	1	1	1	1.27503e-08	0	0	0	0	0	0	0	0	0	0	0	1.09115e-08	4.67992e-08	0	0	8.50386e-09	2.57344e-08	0	0	0	1.78886e-08	0	0	0	0	0	7.78177e-09	7.24216e-09	9.60589e-09	1.77253e-08	0	0	0	0	0	1.64863e-08	1.00284e-08
K02234	cobalamin biosynthesis protein CobW	cobalamin biosynthesis protein CobW	cobalamin biosynthesis protein CobW	0	Metabolism; Metabolism of Cofactors and Vitamins; Porphyrin and chlorophyll metabolism	Metabolism	Metabolism of Cofactors and Vitamins	Porphyrin and chlorophyll metabolism	1	1	1	1.27503e-08	0	0	0	0	0	0	0	0	0	0	0	1.09115e-08	4.67992e-08	0	0	8.50386e-09	2.57344e-08	0	0	0	1.78886e-08	1.41466e-08	0	0	0	0	0	0	0	1.77253e-08	6.00113e-09	0	0	0	0	1.64863e-08	1.00284e-08
K11898	type VI secretion system protein ImpE	type VI secretion system protein ImpE	type VI secretion system protein ImpE	0	Environmental Information Processing; Membrane Transport; Secretion system	Environmental Information Processing	Membrane Transport	Secretion system	1	1	1	1.27503e-08	0	0	0	0	0	0	0	0	0	0	0	1.09115e-08	4.67992e-08	0	0	8.50386e-09	2.57344e-08	0	0	0	0	0	0	0	0	0	0	0	0	0	0	0	0	0	0	0	1.00284e-08
K11897	type VI secretion system protein ImpF	type VI secretion system protein ImpF	type VI secretion system protein ImpF	0	Environmental Information Processing; Membrane Transport; Secretion system	Environmental Information Processing	Membrane Transport	Secretion system	1	1	1	1.27503e-08	0	0	0	0	0	0	0	0	0	0	0	1.09115e-08	4.67992e-08	0	0	8.50386e-09	2.57344e-08	0	0	0	0	0	0	0	0	0	7.78177e-09	0	0	8.86264e-09	0	0	0	0	0	0	1.00284e-08
K14335	alpha-1,6-mannosyltransferase [EC:2.4.1.-]	alpha-1,6-mannosyltransferase [EC:2.4.1.-]	alpha-1,6-mannosyltransferase	EC:2.4.1.-	Metabolism; Glycan Biosynthesis and Metabolism; Glycosyltransferases	Metabolism	Glycan Biosynthesis and Metabolism	Glycosyltransferases	1	1	1	0	0	0	0	0	0	0	0	0	0	0	0	1.09115e-08	2.33996e-08	1.05175e-08	0	0	0	0	0	0	0	0	0	0	0	0	0	0	0	0	0	0	0	1.37165e-08	0	0	0
K14333	2,3-dihydroxybenzoate decarboxylase [EC:4.1.1.46]	2,3-dihydroxybenzoate decarboxylase [EC:4.1.1.46]	2,3-dihydroxybenzoate decarboxylase	EC:4.1.1.46	Metabolism; Xenobiotics Biodegradation and Metabolism; Aminobenzoate degradation|Metabolism; Xenobiotics Biodegradation and Metabolism; Benzoate degradation	Metabolism	Xenobiotics Biodegradation and Metabolism	Aminobenzoate degradation	1	1	1	0	0	0	0	0	0	0	0	0	0	0	0	0	0	0	0	8.50386e-09	0	0	0	0	0	0	0	1.49586e-08	0	0	0	0	9.60589e-09	8.86264e-09	0	0	0	0	0	0	0
K12994	alpha-1,3-rhamnosyltransferase [EC:2.4.1.-]	alpha-1,3-rhamnosyltransferase [EC:2.4.1.-]	alpha-1,3-rhamnosyltransferase	EC:2.4.1.-	Metabolism; Glycan Biosynthesis and Metabolism; Glycosyltransferases|Metabolism; Glycan Biosynthesis and Metabolism; Lipopolysaccharide biosynthesis proteins	Metabolism	Glycan Biosynthesis and Metabolism	Glycosyltransferases	1	1	1	1.27503e-08	0	0	0	0	0	0	0	0	0	0	0	1.09115e-08	4.67992e-08	0	0	8.50386e-09	2.57344e-08	0	0	0	1.78886e-08	0	0	0	0	0	0	7.24216e-09	0	0	0	0	0	0	0	0	1.00284e-08
K14585	trans-o-hydroxybenzylidenepyruvate hydratase-aldolase [EC:4.1.2.45]	trans-o-hydroxybenzylidenepyruvate hydratase-aldolase [EC:4.1.2.45]	trans-o-hydroxybenzylidenepyruvate hydratase-aldolase	EC:4.1.2.45	Metabolism; Xenobiotics Biodegradation and Metabolism; Naphthalene degradation	Metabolism	Xenobiotics Biodegradation and Metabolism	Naphthalene degradation	1	1	1	1.27503e-08	0	0	0	0	0	0	0	0	0	0	0	1.09115e-08	4.67992e-08	0	0	8.50386e-09	2.57344e-08	0	0	0	0	0	0	0	0	0	0	0	0	0	0	0	0	0	0	0	1.00284e-08
K01461	N-acyl-D-glutamate deacylase [EC:3.5.1.82]	N-acyl-D-glutamate deacylase [EC:3.5.1.82]	N-acyl-D-glutamate deacylase	EC:3.5.1.82	Unclassified; Metabolism; Others	Unclassified	Metabolism	Others	1	1	1	0	0	0	0	0	0	0	0	0	0	0	0	0	0	0	0	8.50386e-09	0	0	0	0	0	0	0	1.49586e-08	0	0	0	0	9.60589e-09	8.86264e-09	0	0	0	0	0	0	0
K09925	hypothetical protein	hypothetical protein	hypothetical protein	0	Unclassified; Poorly Characterized; Function unknown	Unclassified	Poorly Characterized	Function unknown	1	1	1	1.27503e-08	0	0	0	0	0	0	0	0	0	0	0	1.09115e-08	4.67992e-08	0	0	8.50386e-09	2.57344e-08	0	0	0	0	0	0	0	0	0	0	0	0	0	0	0	0	0	0	0	1.00284e-08
K00256	isoquinoline 1-oxidoreductase [EC:1.3.99.16]	isoquinoline 1-oxidoreductase [EC:1.3.99.16]	isoquinoline 1-oxidoreductase	EC:1.3.99.16	Unclassified; Metabolism; Energy metabolism	Unclassified	Metabolism	Energy metabolism	1	1	1	1.27503e-08	0	0	0	0	0	0	0	0	0	0	0	1.09115e-08	4.67992e-08	0	0	8.50386e-09	2.57344e-08	0	0	0	0	0	0	0	0	0	0	7.24216e-09	9.60589e-09	0	0	0	0	0	0	0	1.00284e-08
K11949	4-(2-carboxyphenyl)-2-oxobut-3-enoate aldolase [EC:4.1.2.34]	4-(2-carboxyphenyl)-2-oxobut-3-enoate aldolase [EC:4.1.2.34]	4-(2-carboxyphenyl)-2-oxobut-3-enoate aldolase	EC:4.1.2.34	Metabolism; Xenobiotics Biodegradation and Metabolism; Polycyclic aromatic hydrocarbon degradation	Metabolism	Xenobiotics Biodegradation and Metabolism	Polycyclic aromatic hydrocarbon degradation	1	1	1	1.27503e-08	0	0	0	0	0	0	0	0	0	0	0	1.09115e-08	4.67992e-08	0	0	8.50386e-09	2.57344e-08	0	0	0	0	0	0	0	0	0	0	0	0	0	0	0	0	0	0	0	1.00284e-08
K03339	6-phospho-5-dehydro-2-deoxy-D-gluconate aldolase [EC:4.1.2.29]	6-phospho-5-dehydro-2-deoxy-D-gluconate aldolase [EC:4.1.2.29]	6-phospho-5-dehydro-2-deoxy-D-gluconate aldolase	EC:4.1.2.29	Metabolism; Carbohydrate Metabolism; Inositol phosphate metabolism	Metabolism	Carbohydrate Metabolism	Inositol phosphate metabolism	1	1	1	0	0	0	0	0	0	0	0	0	0	0	0	0	0	0	0	0	0	1.11979e-08	0	1.18371e-08	0	0	1.5159e-08	0	9.69181e-09	0	7.78177e-09	7.24216e-09	1.92118e-08	0	1.80034e-08	1.67492e-08	0	0	0	0	1.00284e-08
K03333	cholesterol oxidase [EC:1.1.3.6]	cholesterol oxidase [EC:1.1.3.6]	cholesterol oxidase	EC:1.1.3.6	Metabolism; Lipid Metabolism; Steroid biosynthesis	Metabolism	Lipid Metabolism	Steroid biosynthesis	1	1	1	0	0	0	0	0	0	0	0	0	0	0	1.94043e-08	0	0	1.05175e-08	0	0	1.28672e-08	0	0	0	0	0	1.5159e-08	0	9.69181e-09	0	7.78177e-09	0	0	0	0	0	0	0	0	0	0
K07231	putative iron-regulated protein	putative iron-regulated protein	putative iron-regulated protein	0	Unclassified; Cellular Processes and Signaling; Inorganic ion transport and metabolism	Unclassified	Cellular Processes and Signaling	Inorganic ion transport and metabolism	1	1	1	1.27503e-08	0	0	0	0	0	0	0	0	0	0	0	1.09115e-08	4.67992e-08	0	0	1.70077e-08	2.57344e-08	0	0	0	1.78886e-08	0	0	1.49586e-08	9.69181e-09	0	7.78177e-09	0	9.60589e-09	1.77253e-08	0	0	0	0	0	1.64863e-08	1.00284e-08
K07230	None	None	None	0	Unclassified; Cellular Processes and Signaling; Inorganic ion transport and metabolism	Unclassified	Cellular Processes and Signaling	Inorganic ion transport and metabolism	1	1	1	0	0	0	0	0	0	0	0	0	0	0	0	1.09115e-08	0	0	0	8.50386e-09	1.28672e-08	0	0	0	1.78886e-08	1.41466e-08	0	1.49586e-08	0	0	1.55635e-08	7.24216e-09	2.88177e-08	0	6.00113e-09	0	0	1.37165e-08	0	0	0
K01274	D-alanyl-D-alanine dipeptidase [EC:3.4.13.-]	D-alanyl-D-alanine dipeptidase [EC:3.4.13.-]	D-alanyl-D-alanine dipeptidase	EC:3.4.13.-	Unclassified; Cellular Processes and Signaling; Membrane and intracellular structural molecules	Unclassified	Cellular Processes and Signaling	Membrane and intracellular structural molecules	1	1	1	0	0	0	0	0	0	0	0	0	0	0	0	0	0	0	0	8.50386e-09	0	0	0	0	0	1.41466e-08	1.5159e-08	1.49586e-08	0	0	0	0	9.60589e-09	0	0	0	0	0	0	0	0
K11014	cytolethal distending toxin subunit B	cytolethal distending toxin subunit B	cytolethal distending toxin subunit B	0	Environmental Information Processing; Signaling Molecules and Interaction; Bacterial toxins	Environmental Information Processing	Signaling Molecules and Interaction	Bacterial toxins	1	1	1	0	0	0	0	0	0	0	0	0	0	0	0	0	0	1.2621e-07	0	1.70077e-08	0	6.71874e-08	5.7471e-08	0	1.07331e-07	0	4.54771e-07	4.78677e-07	5.23358e-07	1.45258e-06	3.26834e-07	0	0	0	0	0	0	1.37165e-08	0	0	0
K11015	cytolethal distending toxin subunit C	cytolethal distending toxin subunit C	cytolethal distending toxin subunit C	0	Environmental Information Processing; Signaling Molecules and Interaction; Bacterial toxins	Environmental Information Processing	Signaling Molecules and Interaction	Bacterial toxins	1	1	1	0	0	0	0	0	0	0	0	0	0	0	0	0	0	1.2621e-07	0	1.70077e-08	0	6.71874e-08	5.7471e-08	0	1.07331e-07	0	4.54771e-07	4.78677e-07	5.23358e-07	1.45258e-06	3.26834e-07	0	0	0	0	0	0	0	0	0	0
K11013	cytolethal distending toxin subunit A	cytolethal distending toxin subunit A	cytolethal distending toxin subunit A	0	Environmental Information Processing; Signaling Molecules and Interaction; Bacterial toxins	Environmental Information Processing	Signaling Molecules and Interaction	Bacterial toxins	1	1	1	0	0	0	0	0	0	0	0	0	0	0	0	0	0	1.2621e-07	0	1.70077e-08	0	6.71874e-08	5.7471e-08	0	1.07331e-07	0	4.54771e-07	4.78677e-07	5.23358e-07	1.45258e-06	3.26834e-07	0	0	0	0	0	0	0	0	0	0
K06882	None	None	None	0	Unclassified; Poorly Characterized; General function prediction only	Unclassified	Poorly Characterized	General function prediction only	1	1	1	0	0	0	0	0	0	0	0	0	0	0	0	0	0	1.2621e-07	0	1.70077e-08	0	6.71874e-08	5.7471e-08	0	1.07331e-07	0	4.54771e-07	4.78677e-07	5.23358e-07	1.45258e-06	3.26834e-07	0	0	0	0	0	0	0	0	0	0
K04016	formate-dependent nitrite reductase, possible assembly protein; cytochrome c-type protein NrfE	formate-dependent nitrite reductase, possible assembly protein; cytochrome c-type protein NrfE	formate-dependent nitrite reductase, possible assembly protein; cytochrome c-type protein NrfE	0	Metabolism; Energy Metabolism; Nitrogen metabolism	Metabolism	Energy Metabolism	Nitrogen metabolism	1	1	1	0	0	0	0	0	0	0	0	0	0	0	0	1.09115e-08	0	0	0	0	1.28672e-08	0	0	0	0	0	0	0	0	0	0	0	0	0	0	0	0	0	0	0	0
K01121	2,3-cyclic-nucleotide 3-phosphodiesterase [EC:3.1.4.37]	2',3'-cyclic-nucleotide 3'-phosphodiesterase [EC:3.1.4.37]	2',3'-cyclic-nucleotide 3'-phosphodiesterase	EC:3.1.4.37	Unclassified; Metabolism; Nucleotide metabolism	Unclassified	Metabolism	Nucleotide metabolism	1	1	1	0	0	0	0	0	0	0	0	0	0	0	0	0	0	1.2621e-07	0	1.70077e-08	0	6.71874e-08	5.7471e-08	0	1.07331e-07	0	4.54771e-07	4.78677e-07	5.23358e-07	1.45258e-06	3.26834e-07	0	0	0	0	0	0	0	0	0	0
K12976	lipid A 3-O-deacylase [EC:3.1.-.-]	lipid A 3-O-deacylase [EC:3.1.-.-]	lipid A 3-O-deacylase	EC:3.1.-.-	Metabolism; Glycan Biosynthesis and Metabolism; Lipopolysaccharide biosynthesis proteins	Metabolism	Glycan Biosynthesis and Metabolism	Lipopolysaccharide biosynthesis proteins	1	1	1	0	0	0	0	0	0	0	0	0	0	0	0	0	0	0	0	8.50386e-09	0	0	0	0	1.78886e-08	0	0	1.49586e-08	9.69181e-09	0	0	0	9.60589e-09	0	0	0	0	0	0	0	0
K14750	ethylbenzene dioxygenase ferredoxin component	ethylbenzene dioxygenase ferredoxin component	ethylbenzene dioxygenase ferredoxin component	0	None	None	0	0	1	1	1	1.27503e-08	0	0	0	0	0	0	0	0	0	0	0	1.09115e-08	4.67992e-08	0	0	8.50386e-09	2.57344e-08	0	0	0	0	0	0	0	0	0	0	0	0	0	0	0	0	0	0	0	1.00284e-08
K14751	2,3-dihydroxyethylbenzene 1,2-dioxygenase [EC:1.13.11.-]	2,3-dihydroxyethylbenzene 1,2-dioxygenase [EC:1.13.11.-]	2,3-dihydroxyethylbenzene 1,2-dioxygenase	EC:1.13.11.-	None	None	0	0	1	1	1	1.27503e-08	0	0	0	0	0	0	0	0	0	0	0	1.09115e-08	4.67992e-08	0	0	8.50386e-09	2.57344e-08	0	0	0	0	0	0	0	0	0	0	0	0	0	0	0	0	0	0	0	1.00284e-08
K00154	coniferyl-aldehyde dehydrogenase [EC:1.2.1.68]	coniferyl-aldehyde dehydrogenase [EC:1.2.1.68]	coniferyl-aldehyde dehydrogenase	EC:1.2.1.68	Unclassified; Metabolism; Energy metabolism	Unclassified	Metabolism	Energy metabolism	1	1	1	1.27503e-08	0	0	0	2.11414e-08	0	0	0	0	0	0	0	1.09115e-08	7.01987e-08	0	0	1.70077e-08	2.57344e-08	0	0	0	1.78886e-08	1.41466e-08	0	0	0	0	0	7.24216e-09	0	1.77253e-08	6.00113e-09	0	0	1.37165e-08	0	0	1.00284e-08
K05523	molecular chaperone HchA (Hsp31)	molecular chaperone HchA (Hsp31)	molecular chaperone HchA (Hsp31)	0	Unclassified; Genetic Information Processing; Protein folding and associated processing	Unclassified	Genetic Information Processing	Protein folding and associated processing	1	1	1	0	0	0	0	0	0	0	0	0	0	0	0	0	0	0	0	0	1.28672e-08	0	0	0	0	0	0	0	0	0	0	0	0	0	0	0	0	0	0	0	0
K02480	two-component system, NarL family, sensor kinase [EC:2.7.13.3]	two-component system, NarL family, sensor kinase [EC:2.7.13.3]	two-component system, NarL family, sensor kinase	EC:2.7.13.3	Metabolism; Enzyme Families; Protein kinases|Environmental Information Processing; Signal Transduction; Two-component system	Metabolism	Enzyme Families	Protein kinases	1	1	1	1.27503e-08	0	0	0	0	0	0	0	0	0	0	0	1.09115e-08	4.67992e-08	0	0	8.50386e-09	2.57344e-08	0	0	0	1.78886e-08	1.41466e-08	0	0	0	0	0	0	0	0	6.00113e-09	0	0	0	0	0	1.00284e-08
K02487	type IV pili sensor histidine kinase and response regulator	type IV pili sensor histidine kinase and response regulator	type IV pili sensor histidine kinase and response regulator	0	Cellular Processes; Cell Motility; Bacterial motility proteins|Environmental Information Processing; Signal Transduction; Two-component system	Cellular Processes	Cell Motility	Bacterial motility proteins	1	1	1	0	0	0	0	0	2.16084e-08	0	0	0	0	0	0	0	0	1.05175e-08	0	1.70077e-08	1.28672e-08	0	0	1.18371e-08	1.78886e-08	1.41466e-08	0	1.49586e-08	9.69181e-09	0	3.11271e-08	7.24216e-09	4.80295e-08	0	6.00113e-09	0	0	0	0	1.64863e-08	0
K09950	hypothetical protein	hypothetical protein	hypothetical protein	0	Unclassified; Poorly Characterized; Function unknown	Unclassified	Poorly Characterized	Function unknown	1	1	1	0	0	0	0	1.05707e-08	0	0	1.07726e-08	1.58588e-08	0	0	0	0	2.33996e-08	0	0	8.50386e-09	1.28672e-08	0	0	0	1.78886e-08	0	0	0	9.69181e-09	0	7.78177e-09	7.24216e-09	0	0	0	0	0	1.37165e-08	0	1.64863e-08	0
K14189	uncharacterized oxidoreductase [EC:1.-.-.-]	uncharacterized oxidoreductase [EC:1.-.-.-]	uncharacterized oxidoreductase	EC:1.-.-.-	Unclassified; Cellular Processes and Signaling; Membrane and intracellular structural molecules	Unclassified	Cellular Processes and Signaling	Membrane and intracellular structural molecules	1	1	1	0	0	0	0	0	0	0	0	0	0	0	0	0	2.33996e-08	1.05175e-08	0	0	0	0	0	0	0	0	0	0	0	0	0	0	9.60589e-09	0	0	0	0	1.37165e-08	0	0	1.00284e-08
K00947	None	None	None	0	Unclassified; Metabolism; Others	Unclassified	Metabolism	Others	1	1	1	0	0	0	0	0	0	0	0	0	0	0	0	0	0	0	0	0	0	0	1.14942e-08	0	0	0	0	0	0	0	0	7.24216e-09	0	0	0	0	0	0	0	0	0
K14579	naphthalene 1,2-dioxygenase subunit alpha [EC:1.14.12.12]	naphthalene 1,2-dioxygenase subunit alpha [EC:1.14.12.12]	naphthalene 1,2-dioxygenase subunit alpha	EC:1.14.12.12	Metabolism; Xenobiotics Biodegradation and Metabolism; Ethylbenzene degradation|Metabolism; Xenobiotics Biodegradation and Metabolism; Polycyclic aromatic hydrocarbon degradation|Metabolism; Xenobiotics Biodegradation and Metabolism; Naphthalene degradation	Metabolism	Xenobiotics Biodegradation and Metabolism	Ethylbenzene degradation	1	1	1	1.27503e-08	0	0	0	0	0	0	0	0	0	0	0	1.09115e-08	4.67992e-08	0	0	8.50386e-09	2.57344e-08	0	0	0	0	0	0	0	0	0	0	0	0	0	0	0	0	0	0	0	1.00284e-08
K12062	conjugal transfer pilin signal peptidase TrbI	conjugal transfer pilin signal peptidase TrbI	conjugal transfer pilin signal peptidase TrbI	0	Environmental Information Processing; Membrane Transport; Secretion system	Environmental Information Processing	Membrane Transport	Secretion system	1	1	1	1.27503e-08	0	0	0	0	1.08042e-08	0	0	0	0	0	0	1.09115e-08	4.67992e-08	0	0	1.70077e-08	2.57344e-08	0	0	0	0	0	0	0	0	0	0	0	0	0	0	0	0	0	0	0	1.00284e-08
K12064	conjugal transfer pilus assembly protein TraV	conjugal transfer pilus assembly protein TraV	conjugal transfer pilus assembly protein TraV	0	Environmental Information Processing; Membrane Transport; Secretion system	Environmental Information Processing	Membrane Transport	Secretion system	1	1	1	1.27503e-08	0	0	0	0	1.08042e-08	0	0	0	0	0	0	1.09115e-08	4.67992e-08	0	0	1.70077e-08	2.57344e-08	0	0	0	0	0	0	0	0	0	0	0	0	0	0	0	0	0	0	0	1.00284e-08
K12065	conjugal transfer pilus assembly protein TraB	conjugal transfer pilus assembly protein TraB	conjugal transfer pilus assembly protein TraB	0	Environmental Information Processing; Membrane Transport; Secretion system	Environmental Information Processing	Membrane Transport	Secretion system	1	1	1	1.27503e-08	0	0	0	0	1.08042e-08	0	0	0	0	0	0	1.09115e-08	4.67992e-08	0	0	1.70077e-08	2.57344e-08	0	0	0	0	0	0	0	0	0	0	0	0	0	0	0	0	0	0	0	1.00284e-08
K07256	taurine dehydrogenase large subunit [EC:1.4.2.-]	taurine dehydrogenase large subunit [EC:1.4.2.-]	taurine dehydrogenase large subunit	EC:1.4.2.-	Metabolism; Metabolism of Other Amino Acids; Taurine and hypotaurine metabolism|Metabolism; Energy Metabolism; Nitrogen metabolism	Metabolism	Metabolism of Other Amino Acids	Taurine and hypotaurine metabolism	1	1	1	1.27503e-08	0	0	0	0	0	0	0	0	0	0	0	1.09115e-08	4.67992e-08	0	0	8.50386e-09	2.57344e-08	0	0	0	0	0	0	0	0	0	0	0	0	8.86264e-09	0	0	0	0	0	0	1.00284e-08
K01617	4-oxalocrotonate decarboxylase [EC:4.1.1.77]	4-oxalocrotonate decarboxylase [EC:4.1.1.77]	4-oxalocrotonate decarboxylase	EC:4.1.1.77	Metabolism; Xenobiotics Biodegradation and Metabolism; Xylene degradation|Metabolism; Xenobiotics Biodegradation and Metabolism; Dioxin degradation|Metabolism; Xenobiotics Biodegradation and Metabolism; Benzoate degradation	Metabolism	Xenobiotics Biodegradation and Metabolism	Xylene degradation	1	1	1	1.27503e-08	0	0	0	0	1.08042e-08	0	0	0	0	0	0	1.09115e-08	4.67992e-08	0	0	1.70077e-08	2.57344e-08	0	0	0	0	0	0	0	0	0	7.78177e-09	0	0	8.86264e-09	0	0	0	0	0	0	1.00284e-08
K09709	hypothetical protein; mesaconyl-C4 CoA hydratase	hypothetical protein; mesaconyl-C4 CoA hydratase	hypothetical protein; mesaconyl-C4 CoA hydratase	0	Metabolism; Energy Metabolism; Carbon fixation pathways in prokaryotes	Metabolism	Energy Metabolism	Carbon fixation pathways in prokaryotes	1	1	1	1.27503e-08	0	0	0	0	0	0	0	0	0	0	0	1.09115e-08	4.67992e-08	0	0	1.70077e-08	2.57344e-08	0	0	0	1.78886e-08	1.41466e-08	0	1.49586e-08	0	0	7.78177e-09	0	9.60589e-09	0	6.00113e-09	0	0	0	0	0	1.00284e-08
K08989	putative membrane protein	putative membrane protein	putative membrane protein	0	Unclassified; Poorly Characterized; Function unknown	Unclassified	Poorly Characterized	Function unknown	1	1	1	0	0	0	1.17334e-08	0	0	0	0	0	0	0	0	1.09115e-08	2.33996e-08	1.05175e-08	0	8.50386e-09	0	0	0	0	0	0	1.5159e-08	0	0	0	0	0	9.60589e-09	0	0	0	0	2.7433e-08	0	0	1.00284e-08
K01483	ureidoglycolate hydrolase [EC:3.5.3.19]	ureidoglycolate hydrolase [EC:3.5.3.19]	ureidoglycolate hydrolase	EC:3.5.3.19	Metabolism; Nucleotide Metabolism; Purine metabolism	Metabolism	Nucleotide Metabolism	Purine metabolism	1	1	1	1.27503e-08	0	0	0	1.05707e-08	0	0	0	0	0	0	0	1.09115e-08	4.67992e-08	0	0	1.70077e-08	2.57344e-08	0	0	0	3.57771e-08	1.41466e-08	0	1.49586e-08	9.69181e-09	0	7.78177e-09	0	9.60589e-09	1.77253e-08	6.00113e-09	0	0	0	0	1.64863e-08	1.00284e-08
K09461	anthraniloyl-CoA monooxygenase [EC:1.14.13.40]	anthraniloyl-CoA monooxygenase [EC:1.14.13.40]	anthraniloyl-CoA monooxygenase	EC:1.14.13.40	Metabolism; Xenobiotics Biodegradation and Metabolism; Aminobenzoate degradation	Metabolism	Xenobiotics Biodegradation and Metabolism	Aminobenzoate degradation	1	1	1	1.27503e-08	0	0	0	0	0	0	0	0	0	0	0	1.09115e-08	4.67992e-08	0	0	1.70077e-08	2.57344e-08	0	0	0	1.78886e-08	0	0	1.49586e-08	0	0	7.78177e-09	0	9.60589e-09	8.86264e-09	0	0	0	0	0	0	1.00284e-08
K09926	hypothetical protein	hypothetical protein	hypothetical protein	0	Unclassified; Poorly Characterized; Function unknown	Unclassified	Poorly Characterized	Function unknown	1	1	1	1.27503e-08	0	0	0	1.05707e-08	0	0	0	0	0	0	0	1.09115e-08	7.01987e-08	0	0	2.55116e-08	2.57344e-08	0	0	0	1.78886e-08	0	0	1.49586e-08	9.69181e-09	0	7.78177e-09	0	9.60589e-09	0	0	1.67492e-08	0	1.37165e-08	0	0	1.00284e-08
K07338	hypothetical protein	hypothetical protein	hypothetical protein	0	Unclassified; Cellular Processes and Signaling; Cell motility and secretion	Unclassified	Cellular Processes and Signaling	Cell motility and secretion	1	1	1	1.27503e-08	0	0	0	0	0	0	0	0	0	0	0	1.09115e-08	4.67992e-08	0	0	1.70077e-08	2.57344e-08	0	0	0	1.78886e-08	0	0	1.49586e-08	9.69181e-09	0	7.78177e-09	0	9.60589e-09	1.77253e-08	0	0	0	0	0	1.64863e-08	1.00284e-08
K00317	trimethylamine dehydrogenase [EC:1.5.8.2]	trimethylamine dehydrogenase [EC:1.5.8.2]	trimethylamine dehydrogenase	EC:1.5.8.2	Metabolism; Energy Metabolism; Methane metabolism	Metabolism	Energy Metabolism	Methane metabolism	1	1	1	0	0	0	0	0	0	0	0	0	0	0	0	0	0	0	0	0	0	1.11979e-08	1.14942e-08	1.18371e-08	0	0	1.5159e-08	0	9.69181e-09	0	0	7.24216e-09	1.92118e-08	0	1.80034e-08	1.67492e-08	0	0	0	0	1.00284e-08
K09990	hypothetical protein	hypothetical protein	hypothetical protein	0	Unclassified; Poorly Characterized; Function unknown	Unclassified	Poorly Characterized	Function unknown	1	1	1	1.27503e-08	0	0	0	1.05707e-08	0	0	0	0	0	0	0	1.09115e-08	7.01987e-08	0	0	1.70077e-08	2.57344e-08	0	0	0	1.78886e-08	0	0	1.49586e-08	9.69181e-09	0	7.78177e-09	7.24216e-09	1.92118e-08	1.77253e-08	0	1.67492e-08	0	1.37165e-08	0	0	1.00284e-08
K01504	glucosamine-6-phosphate isomerase [EC:3.5.99.6]	glucosamine-6-phosphate isomerase [EC:3.5.99.6]	glucosamine-6-phosphate isomerase	EC:3.5.99.6	Unclassified; Metabolism; Carbohydrate metabolism	Unclassified	Metabolism	Carbohydrate metabolism	1	1	1	0	0	0	0	0	0	0	0	0	0	0	0	0	2.33996e-08	0	0	0	0	0	0	0	1.78886e-08	0	0	0	0	0	0	0	0	8.86264e-09	0	0	0	0	0	0	0
K06992	None	None	None	0	Unclassified; Poorly Characterized; General function prediction only	Unclassified	Poorly Characterized	General function prediction only	1	1	1	0	0	0	0	0	0	0	0	0	0	0	0	0	0	1.2621e-07	1.53477e-08	1.70077e-08	0	6.71874e-08	5.7471e-08	0	1.07331e-07	1.41466e-08	4.54771e-07	4.78677e-07	5.3305e-07	1.45258e-06	3.26834e-07	0	0	0	6.00113e-09	0	0	0	0	0	0
K04102	4,5-dihydroxyphthalate decarboxylase [EC:4.1.1.55]	4,5-dihydroxyphthalate decarboxylase [EC:4.1.1.55]	4,5-dihydroxyphthalate decarboxylase	EC:4.1.1.55	Metabolism; Xenobiotics Biodegradation and Metabolism; Polycyclic aromatic hydrocarbon degradation	Metabolism	Xenobiotics Biodegradation and Metabolism	Polycyclic aromatic hydrocarbon degradation	1	1	1	1.27503e-08	0	0	0	0	0	0	0	0	0	0	0	1.09115e-08	4.67992e-08	0	0	1.70077e-08	2.57344e-08	0	0	0	1.78886e-08	0	0	1.49586e-08	0	0	7.78177e-09	0	9.60589e-09	0	0	0	0	0	0	0	1.00284e-08
K00126	formate dehydrogenase, delta subunit [EC:1.2.1.2]	formate dehydrogenase, delta subunit [EC:1.2.1.2]	formate dehydrogenase, delta subunit	EC:1.2.1.2	Metabolism; Carbohydrate Metabolism; Glyoxylate and dicarboxylate metabolism|Metabolism; Energy Metabolism; Methane metabolism	Metabolism	Carbohydrate Metabolism	Glyoxylate and dicarboxylate metabolism	1	1	1	1.27503e-08	0	0	0	0	0	0	0	0	0	0	0	1.09115e-08	4.67992e-08	0	0	1.70077e-08	2.57344e-08	0	0	0	1.78886e-08	0	0	1.49586e-08	0	0	7.78177e-09	0	9.60589e-09	8.86264e-09	0	0	0	0	0	0	1.00284e-08
K00607	None	None	None	0	Unclassified; Metabolism; Others	Unclassified	Metabolism	Others	1	1	1	0	0	0	0	0	0	0	0	0	0	0	0	0	2.33996e-08	0	0	0	0	0	0	0	0	0	0	0	0	0	0	0	0	8.86264e-09	0	0	0	0	0	0	1.00284e-08
K01959	pyruvate carboxylase subunit A [EC:6.4.1.1]	pyruvate carboxylase subunit A [EC:6.4.1.1]	pyruvate carboxylase subunit A	EC:6.4.1.1	Metabolism; Carbohydrate Metabolism; Citrate cycle (TCA cycle)|Metabolism; Energy Metabolism; Carbon fixation pathways in prokaryotes|Metabolism; Carbohydrate Metabolism; Pyruvate metabolism	Metabolism	Carbohydrate Metabolism	Citrate cycle (TCA cycle)	1	1	1	0	0	0	0	0	0	0	0	0	0	0	0	0	0	1.2621e-07	1.53477e-08	1.70077e-08	0	6.71874e-08	5.7471e-08	0	1.07331e-07	0	4.54771e-07	4.78677e-07	5.3305e-07	1.45258e-06	3.26834e-07	0	0	0	6.00113e-09	0	0	0	0	0	0
K00141	benzaldehyde dehydrogenase (NAD) [EC:1.2.1.28]	benzaldehyde dehydrogenase (NAD) [EC:1.2.1.28]	benzaldehyde dehydrogenase (NAD)	EC:1.2.1.28	Metabolism; Xenobiotics Biodegradation and Metabolism; Toluene degradation|Metabolism; Xenobiotics Biodegradation and Metabolism; Xylene degradation|Metabolism; Xenobiotics Biodegradation and Metabolism; Aminobenzoate degradation	Metabolism	Xenobiotics Biodegradation and Metabolism	Toluene degradation	1	1	1	0	0	0	0	0	0	0	0	0	0	0	0	0	0	0	0	8.50386e-09	0	0	0	0	1.78886e-08	0	0	1.49586e-08	9.69181e-09	0	0	0	9.60589e-09	0	0	0	0	0	0	0	0
K14048	urease subunit gamma/beta [EC:3.5.1.5]	urease subunit gamma/beta [EC:3.5.1.5]	urease subunit gamma/beta	EC:3.5.1.5	Metabolism; Xenobiotics Biodegradation and Metabolism; Atrazine degradation|Human Diseases; Infectious Diseases; Epithelial cell signaling in Helicobacter pylori infection|Metabolism; Nucleotide Metabolism; Purine metabolism|Metabolism; Amino Acid Metabolism; Arginine and proline metabolism	Metabolism	Xenobiotics Biodegradation and Metabolism	Atrazine degradation	1	1	1	0	0	0	0	0	0	0	0	0	0	0	0	0	0	1.2621e-07	0	1.70077e-08	0	6.71874e-08	5.7471e-08	0	1.07331e-07	0	4.54771e-07	4.78677e-07	5.23358e-07	1.45258e-06	3.26834e-07	0	0	0	0	0	0	0	0	0	0
K03532	trimethylamine-N-oxide reductase (cytochrome c) 1, cytochrome c-type subunit TorC	trimethylamine-N-oxide reductase (cytochrome c) 1, cytochrome c-type subunit TorC	trimethylamine-N-oxide reductase (cytochrome c) 1, cytochrome c-type subunit TorC	0	Environmental Information Processing; Signal Transduction; Two-component system	Environmental Information Processing	Signal Transduction	Two-component system	1	1	1	0	0	0	0	0	0	0	0	0	0	0	0	0	0	1.2621e-07	0	1.70077e-08	0	6.71874e-08	5.7471e-08	0	1.07331e-07	0	4.54771e-07	4.78677e-07	5.23358e-07	1.45258e-06	3.26834e-07	0	0	0	0	0	0	1.37165e-08	0	0	0
K03285	general bacterial porin, GBP family	general bacterial porin, GBP family	general bacterial porin, GBP family	0	Unclassified; Cellular Processes and Signaling; Pores ion channels	Unclassified	Cellular Processes and Signaling	Pores ion channels	1	1	1	0	0	0	0	0	0	0	0	0	0	0	0	1.09115e-08	0	0	0	0	1.28672e-08	0	0	0	0	0	0	0	0	0	0	0	0	0	0	0	0	0	0	0	0
K01564	None	None	None	0	Metabolism; Xenobiotics Biodegradation and Metabolism; Chloroalkane and chloroalkene degradation|Metabolism; Xenobiotics Biodegradation and Metabolism; Atrazine degradation	Metabolism	Xenobiotics Biodegradation and Metabolism	Chloroalkane and chloroalkene degradation	1	1	1	0	0	0	0	0	0	0	0	0	0	0	0	0	0	1.2621e-07	1.53477e-08	1.70077e-08	0	6.71874e-08	5.7471e-08	0	1.07331e-07	0	4.54771e-07	4.78677e-07	5.3305e-07	1.45258e-06	3.26834e-07	0	0	0	6.00113e-09	0	0	0	0	0	0
K05550	benzoate 1,2-dioxygenase beta subunit [EC:1.14.12.10]	benzoate 1,2-dioxygenase beta subunit [EC:1.14.12.10]	benzoate 1,2-dioxygenase beta subunit	EC:1.14.12.10	Metabolism; Xenobiotics Biodegradation and Metabolism; Fluorobenzoate degradation|Metabolism; Xenobiotics Biodegradation and Metabolism; Benzoate degradation	Metabolism	Xenobiotics Biodegradation and Metabolism	Fluorobenzoate degradation	1	1	1	0	0	0	0	0	0	0	0	0	0	0	0	0	0	0	0	8.50386e-09	0	0	0	0	1.78886e-08	0	0	1.49586e-08	9.69181e-09	0	0	0	9.60589e-09	0	0	0	0	0	0	0	0
K12306	MFS transporter, FLVCR family, MFS-domain-containing protein 7	MFS transporter, FLVCR family, MFS-domain-containing protein 7	MFS transporter, FLVCR family, MFS-domain-containing protein 7	0	Environmental Information Processing; Membrane Transport; Transporters	Environmental Information Processing	Membrane Transport	Transporters	1	1	1	0	0	0	0	0	0	0	0	0	0	0	0	0	0	1.05175e-08	0	0	0	0	0	1.18371e-08	0	0	0	0	0	0	0	7.24216e-09	0	8.86264e-09	6.00113e-09	0	0	0	0	0	0
K01917	glutathionylspermidine synthase [EC:6.3.1.8]	glutathionylspermidine synthase [EC:6.3.1.8]	glutathionylspermidine synthase	EC:6.3.1.8	Metabolism; Metabolism of Other Amino Acids; Glutathione metabolism	Metabolism	Metabolism of Other Amino Acids	Glutathione metabolism	1	1	1	0	0	0	0	0	0	0	0	0	0	0	0	0	0	1.2621e-07	0	1.70077e-08	0	6.71874e-08	5.7471e-08	0	1.07331e-07	0	4.54771e-07	4.78677e-07	5.23358e-07	1.45258e-06	3.26834e-07	0	0	0	0	0	0	0	0	0	0
K00207	dihydropyrimidine dehydrogenase (NADP+) [EC:1.3.1.2]	dihydropyrimidine dehydrogenase (NADP+) [EC:1.3.1.2]	dihydropyrimidine dehydrogenase (NADP+)	EC:1.3.1.2	Metabolism; Metabolism of Other Amino Acids; beta-Alanine metabolism|Metabolism; Nucleotide Metabolism; Pyrimidine metabolism|Metabolism; Metabolism of Cofactors and Vitamins; Pantothenate and CoA biosynthesis|Metabolism; Xenobiotics Biodegradation and Metabolism; Drug metabolism - other enzymes	Metabolism	Metabolism of Other Amino Acids	beta-Alanine metabolism	1	1	1	1.27503e-08	0	0	0	0	0	0	0	0	0	0	0	1.09115e-08	4.67992e-08	0	0	8.50386e-09	2.57344e-08	0	0	0	1.78886e-08	1.41466e-08	0	0	0	0	0	0	0	1.77253e-08	6.00113e-09	0	0	0	0	0	1.00284e-08
K09804	hypothetical protein	hypothetical protein	hypothetical protein	0	Unclassified; Poorly Characterized; Function unknown	Unclassified	Poorly Characterized	Function unknown	1	1	1	0	0	0	0	0	0	0	0	0	0	0	0	0	0	1.2621e-07	0	1.70077e-08	0	6.71874e-08	6.89652e-08	0	1.07331e-07	0	4.54771e-07	4.78677e-07	5.23358e-07	1.45258e-06	3.26834e-07	0	0	0	0	0	0	0	0	0	0
K01249	DNA glycosylase [EC:3.2.2.-]	DNA glycosylase [EC:3.2.2.-]	DNA glycosylase	EC:3.2.2.-	Unclassified; Genetic Information Processing; Replication, recombination and repair proteins	Unclassified	Genetic Information Processing	Replication, recombination and repair proteins	1	1	1	0	0	0	0	0	0	0	0	0	0	0	0	0	0	1.05175e-08	0	0	0	0	0	1.18371e-08	0	0	0	0	0	0	0	7.24216e-09	0	8.86264e-09	6.00113e-09	0	0	0	0	0	0
K00220	cyclohexadienyl dehydrogenase [EC:1.3.1.43]; cyclohexadieny/prephenate dehydrogenase [EC:1.3.1.43 1.3.1.12]	cyclohexadienyl dehydrogenase [EC:1.3.1.43]; cyclohexadieny/prephenate dehydrogenase [EC:1.3.1.43 1.3.1.12]	cyclohexadienyl dehydrogenase	EC:1.3.1.43	Metabolism; Amino Acid Metabolism; Phenylalanine, tyrosine and tryptophan biosynthesis|Metabolism; Biosynthesis of Other Secondary Metabolites; Novobiocin biosynthesis	Metabolism	Amino Acid Metabolism	Phenylalanine, tyrosine and tryptophan biosynthesis	1	1	1	0	0	0	0	0	0	0	0	0	0	0	0	0	0	0	0	8.50386e-09	0	0	0	0	1.78886e-08	1.41466e-08	0	0	0	0	0	0	0	1.77253e-08	6.00113e-09	0	0	0	0	0	0
K12536	ATP-binding cassette, subfamily C, bacterial HasD	ATP-binding cassette, subfamily C, bacterial HasD	ATP-binding cassette, subfamily C, bacterial HasD	0	Environmental Information Processing; Membrane Transport; Secretion system	Environmental Information Processing	Membrane Transport	Secretion system	1	1	1	0	0	0	0	0	0	0	0	0	0	0	0	1.09115e-08	0	1.05175e-08	0	0	0	0	0	0	1.78886e-08	0	0	0	0	0	0	0	0	0	0	0	0	1.37165e-08	0	0	0
K10975	allantoin permease	allantoin permease	allantoin permease	0	Unclassified; Cellular Processes and Signaling; Other ion-coupled transporters	Unclassified	Cellular Processes and Signaling	Other ion-coupled transporters	1	1	1	0	0	0	0	0	0	0	0	0	0	0	0	0	0	5.25875e-08	0	0	1.28672e-08	1.11979e-08	1.14942e-08	1.18371e-08	1.78886e-08	0	0	1.49586e-08	9.69181e-09	0	0	1.44843e-08	9.60589e-09	8.86264e-09	6.00113e-09	0	0	0	0	1.64863e-08	0
K09860	hypothetical protein	hypothetical protein	hypothetical protein	0	Unclassified; Poorly Characterized; Function unknown	Unclassified	Poorly Characterized	Function unknown	1	1	1	0	0	0	0	0	0	0	0	0	0	0	0	0	0	1.2621e-07	0	1.70077e-08	0	6.71874e-08	5.7471e-08	0	1.07331e-07	0	4.54771e-07	4.78677e-07	5.23358e-07	1.45258e-06	3.26834e-07	0	0	0	0	0	0	0	0	0	0
K00028	malate dehydrogenase (decarboxylating) [EC:1.1.1.39]	malate dehydrogenase (decarboxylating) [EC:1.1.1.39]	malate dehydrogenase (decarboxylating)	EC:1.1.1.39	Metabolism; Energy Metabolism; Carbon fixation in photosynthetic organisms|Metabolism; Carbohydrate Metabolism; Pyruvate metabolism	Metabolism	Energy Metabolism	Carbon fixation in photosynthetic organisms	1	1	1	0	0	0	0	0	0	0	0	0	0	0	0	0	0	4.207e-08	0	0	1.28672e-08	1.11979e-08	1.14942e-08	0	0	0	0	1.49586e-08	0	0	0	7.24216e-09	9.60589e-09	8.86264e-09	0	0	0	0	0	1.64863e-08	0
K10954	zona occludens toxin	zona occludens toxin	zona occludens toxin	0	Human Diseases; Infectious Diseases; Vibrio cholerae infection|Environmental Information Processing; Signaling Molecules and Interaction; Bacterial toxins	Human Diseases	Infectious Diseases	Vibrio cholerae infection	1	1	1	1.27503e-08	0	0	0	0	0	0	0	0	0	0	0	1.09115e-08	4.67992e-08	0	0	8.50386e-09	2.57344e-08	0	0	0	0	0	0	0	0	0	0	0	0	0	0	0	0	0	0	0	1.00284e-08
K00499	choline monooxygenase [EC:1.14.15.7]	choline monooxygenase [EC:1.14.15.7]	choline monooxygenase	EC:1.14.15.7	Metabolism; Amino Acid Metabolism; Glycine, serine and threonine metabolism	Metabolism	Amino Acid Metabolism	Glycine, serine and threonine metabolism	1	1	1	1.27503e-08	0	0	0	0	0	0	0	0	0	0	0	1.09115e-08	4.67992e-08	0	0	8.50386e-09	2.57344e-08	0	0	0	0	0	0	0	0	0	0	0	0	0	0	0	0	0	0	0	1.00284e-08
K00493	unspecific monooxygenase [EC:1.14.14.1]	unspecific monooxygenase [EC:1.14.14.1]	unspecific monooxygenase	EC:1.14.14.1	Metabolism; Xenobiotics Biodegradation and Metabolism; Aminobenzoate degradation|Metabolism; Amino Acid Metabolism; Tryptophan metabolism|Metabolism; Lipid Metabolism; Fatty acid metabolism	Metabolism	Xenobiotics Biodegradation and Metabolism	Aminobenzoate degradation	1	1	1	1.27503e-08	0	0	0	0	0	0	0	0	0	0	0	1.09115e-08	4.67992e-08	0	0	1.70077e-08	2.57344e-08	0	0	0	0	0	0	0	0	0	0	0	0	8.86264e-09	0	0	0	0	0	0	1.00284e-08
K08295	2-aminobenzoate-CoA ligase [EC:6.2.1.32]	2-aminobenzoate-CoA ligase [EC:6.2.1.32]	2-aminobenzoate-CoA ligase	EC:6.2.1.32	Metabolism; Xenobiotics Biodegradation and Metabolism; Aminobenzoate degradation	Metabolism	Xenobiotics Biodegradation and Metabolism	Aminobenzoate degradation	1	1	1	1.27503e-08	0	0	0	0	0	0	0	0	0	0	0	1.09115e-08	4.67992e-08	0	0	1.70077e-08	2.57344e-08	0	0	0	1.78886e-08	0	0	1.49586e-08	0	0	7.78177e-09	0	9.60589e-09	8.86264e-09	0	0	0	0	0	0	1.00284e-08
K14584	2-hydroxychromene-2-carboxylate isomerase [EC:5.99.1.4]	2-hydroxychromene-2-carboxylate isomerase [EC:5.99.1.4]	2-hydroxychromene-2-carboxylate isomerase	EC:5.99.1.4	Metabolism; Xenobiotics Biodegradation and Metabolism; Naphthalene degradation	Metabolism	Xenobiotics Biodegradation and Metabolism	Naphthalene degradation	1	1	1	1.27503e-08	0	0	0	0	0	0	0	0	0	0	0	1.09115e-08	4.67992e-08	0	0	8.50386e-09	2.57344e-08	0	0	0	0	0	0	0	0	0	0	0	0	0	0	0	0	0	0	0	1.00284e-08
K09190	hypothetical protein	hypothetical protein	hypothetical protein	0	Unclassified; Poorly Characterized; Function unknown	Unclassified	Poorly Characterized	Function unknown	1	1	1	0	0	0	0	1.05707e-08	0	0	0	0	0	0	0	0	2.33996e-08	0	0	8.50386e-09	0	0	0	0	0	0	0	0	0	0	0	0	0	0	0	0	0	1.37165e-08	0	0	0
K14749	ethylbenzene dioxygenase beta subunit [EC:1.14.12.-]	ethylbenzene dioxygenase beta subunit [EC:1.14.12.-]	ethylbenzene dioxygenase beta subunit	EC:1.14.12.-	None	None	0	0	1	1	1	1.27503e-08	0	0	0	0	0	0	0	0	0	0	0	1.09115e-08	4.67992e-08	0	0	8.50386e-09	2.57344e-08	0	0	0	0	0	0	0	0	0	0	0	0	0	0	0	0	0	0	0	1.00284e-08
K07268	opacity associated protein	opacity associated protein	opacity associated protein	0	Unclassified; Cellular Processes and Signaling; Membrane and intracellular structural molecules	Unclassified	Cellular Processes and Signaling	Membrane and intracellular structural molecules	1	1	1	0	0	0	0	0	0	0	0	0	0	0	0	1.09115e-08	0	0	0	0	1.28672e-08	0	0	0	0	0	0	0	0	0	0	0	0	0	0	0	0	0	0	0	0
K02572	ferredoxin-type protein NapF	ferredoxin-type protein NapF	ferredoxin-type protein NapF	0	Metabolism; Energy Metabolism; Nitrogen metabolism	Metabolism	Energy Metabolism	Nitrogen metabolism	1	1	1	0	0	0	0	1.05707e-08	0	0	0	0	0	0	0	1.09115e-08	2.33996e-08	0	0	1.70077e-08	1.28672e-08	0	0	0	0	0	0	0	0	0	0	7.24216e-09	0	0	0	0	0	1.37165e-08	0	0	0
K01143	exodeoxyribonuclease (lambda-induced) [EC:3.1.11.3]	exodeoxyribonuclease (lambda-induced) [EC:3.1.11.3]	exodeoxyribonuclease (lambda-induced)	EC:3.1.11.3	Unclassified; Genetic Information Processing; Replication, recombination and repair proteins	Unclassified	Genetic Information Processing	Replication, recombination and repair proteins	1	1	1	1.27503e-08	0	0	0	0	0	0	0	0	0	0	0	1.09115e-08	4.67992e-08	0	0	8.50386e-09	2.57344e-08	0	0	0	0	0	0	0	0	0	0	0	0	8.86264e-09	0	1.67492e-08	0	0	0	0	1.00284e-08
K13797	DNA-directed RNA polymerase subunit beta-beta [EC:2.7.7.6]	DNA-directed RNA polymerase subunit beta-beta' [EC:2.7.7.6]	DNA-directed RNA polymerase subunit beta-beta'	EC:2.7.7.6	Metabolism; Nucleotide Metabolism; Pyrimidine metabolism|Genetic Information Processing; Transcription; Transcription machinery|Genetic Information Processing; Replication and Repair; DNA repair and recombination proteins|Metabolism; Nucleotide Metabolism; Purine metabolism|Genetic Information Processing; Transcription; RNA polymerase	Metabolism	Nucleotide Metabolism	Pyrimidine metabolism	1	1	1	0	0	0	0	0	0	0	0	0	0	0	0	0	0	1.2621e-07	0	1.70077e-08	0	6.71874e-08	5.7471e-08	0	1.07331e-07	0	4.54771e-07	4.78677e-07	5.23358e-07	1.45258e-06	3.26834e-07	0	0	0	0	0	0	0	0	0	0
K09944	hypothetical protein	hypothetical protein	hypothetical protein	0	Unclassified; Poorly Characterized; Function unknown	Unclassified	Poorly Characterized	Function unknown	1	1	1	0	0	0	0	0	0	0	0	0	0	0	0	0	0	1.2621e-07	0	1.70077e-08	0	6.71874e-08	5.7471e-08	0	1.07331e-07	0	4.54771e-07	4.78677e-07	5.23358e-07	1.45258e-06	3.26834e-07	0	0	0	0	0	0	0	0	0	0
K09947	hypothetical protein	hypothetical protein	hypothetical protein	0	Unclassified; Poorly Characterized; Function unknown	Unclassified	Poorly Characterized	Function unknown	1	1	1	1.27503e-08	0	0	0	0	0	0	0	0	0	0	0	1.09115e-08	4.67992e-08	0	0	1.70077e-08	2.57344e-08	0	0	0	1.78886e-08	0	0	1.49586e-08	9.69181e-09	0	7.78177e-09	0	9.60589e-09	1.77253e-08	0	0	0	0	0	1.64863e-08	1.00284e-08
K14974	6-hydroxynicotinate 3-monooxygenase [EC:1.14.13.114]	6-hydroxynicotinate 3-monooxygenase [EC:1.14.13.114]	6-hydroxynicotinate 3-monooxygenase	EC:1.14.13.114	None	None	0	0	1	1	1	1.27503e-08	0	0	0	0	0	0	0	0	0	0	0	1.09115e-08	4.67992e-08	0	0	1.70077e-08	2.57344e-08	0	0	0	1.78886e-08	0	0	1.49586e-08	0	0	7.78177e-09	0	9.60589e-09	0	0	0	0	0	0	0	1.00284e-08
K00561	23S rRNA (adenine2085-N6)-dimethyltransferase [EC:2.1.1.184]; rRNA (adenine-N6-)-methyltransferase [EC:2.1.1.48]	23S rRNA (adenine2085-N6)-dimethyltransferase [EC:2.1.1.184]; rRNA (adenine-N6-)-methyltransferase [EC:2.1.1.48]	23S rRNA (adenine2085-N6)-dimethyltransferase	EC:2.1.1.184	Unclassified; Genetic Information Processing; Translation proteins	Unclassified	Genetic Information Processing	Translation proteins	1	1	1	0	0	0	0	0	0	1.16033e-08	0	0	0	0	0	0	0	4.207e-08	0	8.50386e-09	1.28672e-08	1.11979e-08	1.14942e-08	0	0	1.41466e-08	1.5159e-08	1.49586e-08	9.69181e-09	0	0	7.24216e-09	2.88177e-08	0	0	0	0	0	0	1.64863e-08	0
K01167	ribonuclease T1 [EC:3.1.27.3]	ribonuclease T1 [EC:3.1.27.3]	ribonuclease T1	EC:3.1.27.3	Unclassified; Genetic Information Processing; Translation proteins	Unclassified	Genetic Information Processing	Translation proteins	1	1	1	1.27503e-08	0	0	0	0	0	0	0	0	0	0	0	1.09115e-08	4.67992e-08	0	0	8.50386e-09	2.57344e-08	0	0	0	0	0	0	0	0	0	7.78177e-09	0	0	0	0	0	0	0	0	0	1.00284e-08
K12070	conjugal transfer pilus assembly protein TraI	conjugal transfer pilus assembly protein TraI	conjugal transfer pilus assembly protein TraI	0	Environmental Information Processing; Membrane Transport; Secretion system	Environmental Information Processing	Membrane Transport	Secretion system	1	1	1	1.27503e-08	0	0	0	0	0	0	0	0	0	0	0	1.09115e-08	4.67992e-08	0	0	8.50386e-09	2.57344e-08	0	0	0	0	0	0	0	0	0	0	0	0	0	0	0	0	0	0	0	1.00284e-08
							Enzyme Families	1
							Nucleotide Metabolism	4
							Metabolism of Terpenoids and Polyketides	0
							Metabolism of Cofactors and Vitamins	1
							ABC transporters	3
							Secretion system	9
							Carbohydrate Metabolism	5
							Amino Acid Metabolism	3
							Lipid Metabolism	1
							Energy Metabolism	9
							Cell Motility	1
							Metabolism of Other Amino Acids	0
							Transcription	0
							Signal Transduction	1
							Glycan Biosynthesis and Metabolism	3
							Cellular Processes and Signaling	9
							Xenobiotics Biodegradation and Metabolism	16
							Genetic Information Processing	6
							Metabolism of Other Amino Acids	3
							Signaling Molecules and Interaction	3
							Others	26
[truncated: 11 more columns]

## Sheet: Cat 2
This sheet contains the data of the statistically different PiCrust Data (normalized) belonging to Category 2
KO ID	Name	KEGG_Description	Protein	EC	KEGG_Pathways	KEGG_Pathways_1	KEGG_Pathways_2	KEGG_Pathways_3	Comparison Age8 - Age 18	Comparison Age8 - Age 24	Comparison Age18 - Age 24	Age 8	Age 8	Age 8	Age 8	Age 8	Age 8	Age 8	Age 8	Age 8	Age 8	Age 18	Age 18	Age 18	Age 18	Age 18	Age 18	Age 18	Age 18	Age 18	Age 18	Age 20	Age 20	Age 20	Age 20	Age 20	Age 20	Age 20	Age 20	Age 20	Age 20	Age 22	Age 22	Age 22	Age 22	Age 22	Age 22	Age 22	Age 22
K00752	hyaluronan synthase [EC:2.4.1.212]	hyaluronan synthase [EC:2.4.1.212]	hyaluronan synthase	EC:2.4.1.212	Unclassified; Metabolism; Others	Unclassified	Metabolism	Others	-1	1	1	0	0	0	2.34669e-08	0	0	0	0	3.17175e-08	3.68427e-08	0	0	0	0	2.1035e-08	0	0	0	0	0	0	0	0	0	0	0	3.82259e-08	0	1.44843e-08	1.92118e-08	0	0	0	0	0	0	4.9459e-08	0
K11176	IMP cyclohydrolase [EC:3.5.4.10]	IMP cyclohydrolase [EC:3.5.4.10]	IMP cyclohydrolase	EC:3.5.4.10	Metabolism; Nucleotide Metabolism; Purine metabolism	Metabolism	Nucleotide Metabolism	Purine metabolism	-1	1	1	0	0	0	2.34669e-08	0	0	0	0	3.17175e-08	3.68427e-08	0	0	0	0	2.1035e-08	0	0	0	0	0	0	0	0	0	0	0	3.82259e-08	0	1.44843e-08	1.92118e-08	0	0	0	0	0	0	4.9459e-08	0
K02352	drp35	drp35	drp35	0	Metabolism; Biosynthesis of Other Secondary Metabolites; beta-Lactam resistance	Metabolism	Biosynthesis of Other Secondary Metabolites	beta-Lactam resistance	-1	1	1	0	0	2.07403e-08	0	0	0	0	0	0	0	0	0	0	0	0	0	8.50386e-09	0	0	0	0	0	0	0	0	0	0	0	0	9.60589e-09	0	0	0	0	0	0	0	0
K10984	PTS system, galactosamine-specific IIB component [EC:2.7.1.69]	PTS system, galactosamine-specific IIB component [EC:2.7.1.69]	PTS system, galactosamine-specific IIB component	EC:2.7.1.69	Environmental Information Processing; Membrane Transport; Phosphotransferase system (PTS)|Environmental Information Processing; Membrane Transport; Transporters|Metabolism; Carbohydrate Metabolism; Galactose metabolism	Environmental Information Processing	Membrane Transport	Phosphotransferase system (PTS)	-1	1	1	7.6502e-08	0	0	0	3.17121e-08	0	0	0	1.58588e-08	0	0	0	0	0	0	0	0	0	0	0	0	0	0	0	0	0	0	0	0	0	0	0	0	0	0	0	0	0
K11442	putative uridylyltransferase [EC:2.7.7.-]	putative uridylyltransferase [EC:2.7.7.-]	putative uridylyltransferase	EC:2.7.7.-	Unclassified; Metabolism; Carbohydrate metabolism	Unclassified	Metabolism	Carbohydrate metabolism	-1	1	1	0	0	2.07403e-08	0	0	0	0	0	0	0	0	0	0	0	0	0	8.50386e-09	0	0	0	0	0	0	0	0	0	0	0	0	1.92118e-08	0	0	0	0	0	0	0	0
K14166	copper transport protein	copper transport protein	copper transport protein	0	Unclassified; Cellular Processes and Signaling; Other transporters	Unclassified	Cellular Processes and Signaling	Other transporters	-1	1	1	0	0	2.07403e-08	0	0	0	0	0	0	0	0	0	0	0	0	0	8.50386e-09	0	0	0	0	0	0	0	0	0	0	0	0	9.60589e-09	8.86264e-09	0	0	0	0	0	0	0
K02497	HemX protein	HemX protein	HemX protein	0	Unclassified; Cellular Processes and Signaling; Membrane and intracellular structural molecules	Unclassified	Cellular Processes and Signaling	Membrane and intracellular structural molecules	-1	1	1	0	0	2.07403e-08	0	0	0	0	0	0	0	0	0	0	0	0	0	8.50386e-09	0	0	0	0	0	0	0	0	0	0	0	0	1.92118e-08	0	0	0	0	0	0	0	0
K10208	dehydrosqualene synthase [EC:2.5.1.-]	dehydrosqualene synthase [EC:2.5.1.-]	dehydrosqualene synthase	EC:2.5.1.-	Metabolism; Metabolism of Terpenoids and Polyketides; Prenyltransferases|Metabolism; Metabolism of Terpenoids and Polyketides; Carotenoid biosynthesis	Metabolism	Metabolism of Terpenoids and Polyketides	Prenyltransferases	-1	1	1	0	0	2.07403e-08	0	0	0	0	0	0	0	0	0	0	0	0	0	8.50386e-09	0	0	0	0	0	0	0	0	0	0	0	0	9.60589e-09	0	0	0	0	0	0	0	0
K10209	dehydrosqualene desaturase [EC:1.14.99.-]	dehydrosqualene desaturase [EC:1.14.99.-]	dehydrosqualene desaturase	EC:1.14.99.-	Metabolism; Metabolism of Terpenoids and Polyketides; Carotenoid biosynthesis	Metabolism	Metabolism of Terpenoids and Polyketides	Carotenoid biosynthesis	-1	1	1	0	0	2.07403e-08	0	0	0	0	0	0	0	0	0	0	0	0	0	8.50386e-09	0	0	0	0	0	0	0	0	0	0	0	0	9.60589e-09	0	0	0	0	0	0	0	0
K09744	hypothetical protein	hypothetical protein	hypothetical protein	0	Unclassified; Poorly Characterized; Function unknown	Unclassified	Poorly Characterized	Function unknown	-1	1	1	0	0	0	2.34669e-08	0	0	0	0	3.17175e-08	3.68427e-08	0	0	0	0	2.1035e-08	0	0	0	0	0	0	0	0	0	0	0	3.82259e-08	0	1.44843e-08	1.92118e-08	0	0	0	0	0	0	4.9459e-08	0
K11629	two-component system, OmpR family, bacitracin resistance sensor histidine kinase BceS [EC:2.7.13.3]	two-component system, OmpR family, bacitracin resistance sensor histidine kinase BceS [EC:2.7.13.3]	two-component system, OmpR family, bacitracin resistance sensor histidine kinase BceS	EC:2.7.13.3	Metabolism; Enzyme Families; Protein kinases|Environmental Information Processing; Signal Transduction; Two-component system	Metabolism	Enzyme Families	Protein kinases	-1	1	1	0	0	2.07403e-08	0	0	0	0	0	0	0	0	0	0	0	0	0	8.50386e-09	0	0	0	0	0	0	0	0	0	0	0	0	1.92118e-08	0	0	0	0	0	0	0	0
K02250	competence protein ComK	competence protein ComK	competence protein ComK	0	Environmental Information Processing; Membrane Transport; Secretion system	Environmental Information Processing	Membrane Transport	Secretion system	-1	1	1	0	0	2.07403e-08	0	0	0	0	0	0	0	0	0	0	0	0	0	8.50386e-09	0	0	0	0	0	0	0	0	0	0	7.78177e-09	0	1.92118e-08	0	0	0	0	0	0	0	0
K08255	CoA-disulfide reductase [EC:1.8.1.14]	CoA-disulfide reductase [EC:1.8.1.14]	CoA-disulfide reductase	EC:1.8.1.14	Unclassified; Metabolism; Others	Unclassified	Metabolism	Others	-1	1	1	0	0	2.07403e-08	0	0	0	0	0	0	0	0	0	0	0	0	0	8.50386e-09	0	0	0	0	0	0	0	0	0	0	0	0	1.92118e-08	0	0	0	0	0	0	0	0
K07681	two-component system, NarL family, vancomycin resistance sensor histidine kinase VraS [EC:2.7.13.3]	two-component system, NarL family, vancomycin resistance sensor histidine kinase VraS [EC:2.7.13.3]	two-component system, NarL family, vancomycin resistance sensor histidine kinase VraS	EC:2.7.13.3	Metabolism; Enzyme Families; Protein kinases|Environmental Information Processing; Signal Transduction; Two-component system	Metabolism	Enzyme Families	Protein kinases	-1	1	1	0	0	2.07403e-08	0	0	0	0	0	0	0	0	0	0	0	0	0	8.50386e-09	0	0	0	0	0	0	0	0	0	0	0	0	1.92118e-08	0	0	0	0	0	0	0	0
K07064	None	None	None	0	Unclassified; Poorly Characterized; General function prediction only	Unclassified	Poorly Characterized	General function prediction only	-1	1	1	0	0	0	0	0	0	2.32067e-08	2.15452e-08	0	0	0	0	0	0	0	0	0	0	0	0	0	0	2.82933e-08	0	0	0	0	0	0	9.60589e-09	0	1.20023e-08	0	0	0	0	1.64863e-08	0
K02763	PTS system, D-glucosamine-specific IIA component [EC:2.7.1.69]	PTS system, D-glucosamine-specific IIA component [EC:2.7.1.69]	PTS system, D-glucosamine-specific IIA component	EC:2.7.1.69	Metabolism; Carbohydrate Metabolism; Amino sugar and nucleotide sugar metabolism|Environmental Information Processing; Membrane Transport; Phosphotransferase system (PTS)|Environmental Information Processing; Membrane Transport; Transporters	Metabolism	Carbohydrate Metabolism	Amino sugar and nucleotide sugar metabolism	-1	1	1	7.6502e-08	0	0	0	3.17121e-08	0	0	0	1.58588e-08	0	0	0	0	0	0	0	0	0	0	0	0	0	0	0	0	0	0	0	0	9.60589e-09	0	0	0	0	0	0	0	0
K10211	4,4-diaponeurosporenoate glycosyltransferase [EC:2.4.1.-]	4,4'-diaponeurosporenoate glycosyltransferase [EC:2.4.1.-]	4,4'-diaponeurosporenoate glycosyltransferase	EC:2.4.1.-	Metabolism; Metabolism of Terpenoids and Polyketides; Carotenoid biosynthesis	Metabolism	Metabolism of Terpenoids and Polyketides	Carotenoid biosynthesis	-1	1	1	0	0	2.07403e-08	0	0	0	0	0	0	0	0	0	0	0	0	0	8.50386e-09	0	0	0	0	0	0	0	0	0	0	0	0	9.60589e-09	0	0	0	0	0	0	0	0
K00186	2-oxoisovalerate ferredoxin oxidoreductase, alpha subunit [EC:1.2.7.7]	2-oxoisovalerate ferredoxin oxidoreductase, alpha subunit [EC:1.2.7.7]	2-oxoisovalerate ferredoxin oxidoreductase, alpha subunit	EC:1.2.7.7	Metabolism; Amino Acid Metabolism; Valine, leucine and isoleucine degradation	Metabolism	Amino Acid Metabolism	Valine, leucine and isoleucine degradation	-1	1	1	0	0	0	2.34669e-08	0	0	0	0	3.17175e-08	3.68427e-08	0	0	0	0	2.1035e-08	0	0	0	0	0	0	0	0	0	0	0	3.82259e-08	0	1.44843e-08	1.92118e-08	0	0	0	0	0	0	4.9459e-08	0
K00187	2-oxoisovalerate ferredoxin oxidoreductase, beta subunit [EC:1.2.7.7]	2-oxoisovalerate ferredoxin oxidoreductase, beta subunit [EC:1.2.7.7]	2-oxoisovalerate ferredoxin oxidoreductase, beta subunit	EC:1.2.7.7	Metabolism; Amino Acid Metabolism; Valine, leucine and isoleucine degradation	Metabolism	Amino Acid Metabolism	Valine, leucine and isoleucine degradation	-1	1	1	0	0	0	2.34669e-08	0	0	0	0	3.17175e-08	3.68427e-08	0	0	0	0	2.1035e-08	0	0	0	0	0	0	0	0	0	0	0	3.82259e-08	0	1.44843e-08	1.92118e-08	0	0	0	0	0	0	4.9459e-08	0
K00188	2-oxoisovalerate ferredoxin oxidoreductase, delta subunit [EC:1.2.7.7]	2-oxoisovalerate ferredoxin oxidoreductase, delta subunit [EC:1.2.7.7]	2-oxoisovalerate ferredoxin oxidoreductase, delta subunit	EC:1.2.7.7	Metabolism; Amino Acid Metabolism; Valine, leucine and isoleucine degradation	Metabolism	Amino Acid Metabolism	Valine, leucine and isoleucine degradation	-1	1	1	0	0	0	2.34669e-08	0	0	0	0	3.17175e-08	3.68427e-08	0	0	0	0	2.1035e-08	0	0	0	0	0	0	0	0	0	0	0	3.82259e-08	0	1.44843e-08	1.92118e-08	0	0	0	0	0	0	4.9459e-08	0
K02305	nitric-oxide reductase, cytochrome c-containing subunit II [EC:1.7.99.7]; nitric oxide reductase, cytochrome c-containing subunit II	nitric-oxide reductase, cytochrome c-containing subunit II [EC:1.7.99.7]; nitric oxide reductase, cytochrome c-containing subunit II	nitric-oxide reductase, cytochrome c-containing subunit II	EC:1.7.99.7	Metabolism; Energy Metabolism; Nitrogen metabolism	Metabolism	Energy Metabolism	Nitrogen metabolism	-1	1	1	0	0	0	0	0	1.08042e-08	0	0	0	0	0	0	0	0	0	0	0	0	0	0	0	0	0	0	0	0	0	0	0	0	8.86264e-09	0	0	0	0	0	0	0
K10210	4,4-diaponeurosporene oxidase [EC:1.-.-.-]	4,4'-diaponeurosporene oxidase [EC:1.-.-.-]	4,4'-diaponeurosporene oxidase	EC:1.-.-.-	Metabolism; Metabolism of Terpenoids and Polyketides; Carotenoid biosynthesis	Metabolism	Metabolism of Terpenoids and Polyketides	Carotenoid biosynthesis	-1	1	1	0	0	2.07403e-08	0	0	0	0	0	0	0	0	0	0	0	0	0	8.50386e-09	0	0	0	0	0	0	0	0	0	0	0	0	9.60589e-09	0	0	0	0	0	0	0	0
K09994	PhnO protein [EC:2.3.1.-]	PhnO protein [EC:2.3.1.-]	PhnO protein	EC:2.3.1.-	Unclassified; Poorly Characterized; General function prediction only	Unclassified	Poorly Characterized	General function prediction only	-1	1	1	7.6502e-08	0	0	0	3.17121e-08	0	0	0	1.58588e-08	0	0	0	0	0	1.05175e-08	0	0	0	0	0	1.18371e-08	0	0	0	0	0	0	0	7.24216e-09	0	8.86264e-09	6.00113e-09	0	0	0	0	0	0
K00663	aminoglycoside N6-acetyltransferase [EC:2.3.1.82]	aminoglycoside N6'-acetyltransferase [EC:2.3.1.82]	aminoglycoside N6'-acetyltransferase	EC:2.3.1.82	Unclassified; Metabolism; Others	Unclassified	Metabolism	Others	-1	1	1	0	0	0	2.34669e-08	0	0	0	0	3.17175e-08	3.68427e-08	0	0	1.09115e-08	0	2.1035e-08	0	0	0	0	0	0	0	0	0	0	0	3.82259e-08	0	1.44843e-08	1.92118e-08	8.86264e-09	0	0	0	0	0	4.9459e-08	0
K07476	toprim domain protein	toprim domain protein	toprim domain protein	0	Unclassified; Genetic Information Processing; Replication, recombination and repair proteins	Unclassified	Genetic Information Processing	Replication, recombination and repair proteins	-1	1	1	0	0	2.07403e-08	0	0	0	0	0	0	0	0	0	0	0	0	0	8.50386e-09	0	0	0	0	0	0	0	0	0	0	0	0	1.92118e-08	0	0	0	0	0	0	0	0
K03381	catechol 1,2-dioxygenase [EC:1.13.11.1]	catechol 1,2-dioxygenase [EC:1.13.11.1]	catechol 1,2-dioxygenase	EC:1.13.11.1	Metabolism; Xenobiotics Biodegradation and Metabolism; Toluene degradation|Metabolism; Xenobiotics Biodegradation and Metabolism; Chlorocyclohexane and chlorobenzene degradation|Metabolism; Xenobiotics Biodegradation and Metabolism; Fluorobenzoate degradation|Metabolism; Xenobiotics Biodegradation and Metabolism; Benzoate degradation	Metabolism	Xenobiotics Biodegradation and Metabolism	Toluene degradation	-1	1	1	0	0	0	0	0	1.08042e-08	0	0	0	0	0	0	0	0	0	0	8.50386e-09	0	0	0	0	1.78886e-08	0	0	1.49586e-08	9.69181e-09	0	7.78177e-09	0	9.60589e-09	0	0	0	0	0	0	1.64863e-08	0
K11695	peptidoglycan pentaglycine glycine transferase (the fourth and fifth glycine) [EC:2.3.2.-]	peptidoglycan pentaglycine glycine transferase (the fourth and fifth glycine) [EC:2.3.2.-]	peptidoglycan pentaglycine glycine transferase (the fourth and fifth glycine)	EC:2.3.2.-	Metabolism; Glycan Biosynthesis and Metabolism; Peptidoglycan biosynthesis	Metabolism	Glycan Biosynthesis and Metabolism	Peptidoglycan biosynthesis	-1	1	1	0	0	2.07403e-08	0	0	0	0	0	0	0	0	0	0	0	0	0	8.50386e-09	0	0	0	0	0	0	0	0	0	0	0	0	1.92118e-08	0	0	0	0	0	0	0	0
K11693	peptidoglycan pentaglycine glycine transferase (the first glycine) [EC:2.3.2.-]	peptidoglycan pentaglycine glycine transferase (the first glycine) [EC:2.3.2.-]	peptidoglycan pentaglycine glycine transferase (the first glycine)	EC:2.3.2.-	Metabolism; Glycan Biosynthesis and Metabolism; Peptidoglycan biosynthesis	Metabolism	Glycan Biosynthesis and Metabolism	Peptidoglycan biosynthesis	-1	1	1	0	0	2.07403e-08	0	0	0	0	0	0	0	0	0	0	0	0	0	8.50386e-09	0	0	1.14942e-08	1.18371e-08	0	0	0	0	0	0	7.78177e-09	7.24216e-09	2.88177e-08	0	1.20023e-08	0	0	0	0	0	0
K03433	proteasome beta subunit [EC:3.4.25.1]	proteasome beta subunit [EC:3.4.25.1]	proteasome beta subunit	EC:3.4.25.1	Metabolism; Enzyme Families; Peptidases|Genetic Information Processing; Folding, Sorting and Degradation; Proteasome	Metabolism	Enzyme Families	Peptidases	-1	1	1	0	0	0	1.17334e-08	0	0	2.32067e-08	2.15452e-08	0	0	0	0	0	0	0	0	0	0	0	0	0	0	2.82933e-08	0	0	0	0	0	0	9.60589e-09	0	1.20023e-08	0	0	0	0	1.64863e-08	1.00284e-08
K11476	GntR family transcriptional regulator, gluconate operon transcriptional repressor	GntR family transcriptional regulator, gluconate operon transcriptional repressor	GntR family transcriptional regulator, gluconate operon transcriptional repressor	0	Genetic Information Processing; Transcription; Transcription factors	Genetic Information Processing	Transcription	Transcription factors	-1	1	1	0	0	2.07403e-08	0	0	0	0	0	0	0	0	0	0	0	0	0	8.50386e-09	0	0	0	0	0	0	0	0	0	0	0	0	1.92118e-08	0	0	0	0	0	0	0	0
K07807	hypothetical protein NreA	hypothetical protein NreA	hypothetical protein NreA	0	Unclassified; Poorly Characterized; Function unknown	Unclassified	Poorly Characterized	Function unknown	-1	1	1	0	0	0	2.34669e-08	0	0	0	0	3.17175e-08	3.68427e-08	0	0	0	0	2.1035e-08	0	0	0	0	0	0	0	0	0	0	0	3.82259e-08	0	1.44843e-08	1.92118e-08	8.86264e-09	0	0	0	0	0	4.9459e-08	0
K06347	kinase-associated protein B	kinase-associated protein B	kinase-associated protein B	0	Environmental Information Processing; Signal Transduction; Two-component system	Environmental Information Processing	Signal Transduction	Two-component system	-1	1	1	0	0	2.07403e-08	0	0	0	0	0	0	0	0	0	0	0	0	0	8.50386e-09	0	0	0	0	0	0	0	0	0	0	0	0	1.92118e-08	0	0	0	0	0	0	0	0
K11337	3-hydroxyethyl bacteriochlorophyllide a dehydrogenase [EC:1.-.-.-]	3-hydroxyethyl bacteriochlorophyllide a dehydrogenase [EC:1.-.-.-]	3-hydroxyethyl bacteriochlorophyllide a dehydrogenase	EC:1.-.-.-	Metabolism; Metabolism of Cofactors and Vitamins; Porphyrin and chlorophyll metabolism	Metabolism	Metabolism of Cofactors and Vitamins	Porphyrin and chlorophyll metabolism	-1	1	1	0	0	0	2.34669e-08	0	0	0	0	3.17175e-08	3.68427e-08	0	0	1.09115e-08	0	2.1035e-08	0	0	0	0	0	0	0	0	0	0	0	3.82259e-08	0	1.44843e-08	1.92118e-08	0	0	0	0	1.37165e-08	0	4.9459e-08	1.00284e-08
K13714	bifunctional autolysin [EC:3.5.1.28 3.2.1.96]	bifunctional autolysin [EC:3.5.1.28 3.2.1.96]	bifunctional autolysin	EC:3.5.1.28	Unclassified; Cellular Processes and Signaling; Membrane and intracellular structural molecules	Unclassified	Cellular Processes and Signaling	Membrane and intracellular structural molecules	-1	1	1	0	0	2.07403e-08	0	1.05707e-08	0	0	0	1.58588e-08	0	0	0	0	0	0	0	8.50386e-09	0	0	0	0	0	0	0	0	0	0	7.78177e-09	7.24216e-09	3.84236e-08	0	6.00113e-09	0	0	0	0	0	0
K11632	bacitracin transport system permease protein	bacitracin transport system permease protein	bacitracin transport system permease protein	0	Human Diseases; Infectious Diseases; Staphylococcus aureus infection|Environmental Information Processing; Membrane Transport; ABC transporters|Environmental Information Processing; Membrane Transport; Transporters|Environmental Information Processing; Signal Transduction; Two-component system	Human Diseases	Infectious Diseases	Staphylococcus aureus infection	-1	1	1	0	0	2.07403e-08	0	0	0	0	0	0	0	0	0	0	0	0	0	8.50386e-09	0	0	0	0	0	0	0	0	0	0	0	0	9.60589e-09	0	0	0	0	0	0	0	0
K11630	two-component system, OmpR family, bacitracin resistance response regulator BceR	two-component system, OmpR family, bacitracin resistance response regulator BceR	two-component system, OmpR family, bacitracin resistance response regulator BceR	0	Environmental Information Processing; Signal Transduction; Two-component system	Environmental Information Processing	Signal Transduction	Two-component system	-1	1	1	0	0	2.07403e-08	0	0	0	0	0	0	0	0	0	0	0	0	0	8.50386e-09	0	0	0	0	0	0	0	0	0	0	0	0	1.92118e-08	0	0	0	0	0	0	0	0
K11631	bacitracin transport system ATP-binding protein	bacitracin transport system ATP-binding protein	bacitracin transport system ATP-binding protein	0	Human Diseases; Infectious Diseases; Staphylococcus aureus infection|Environmental Information Processing; Membrane Transport; ABC transporters|Environmental Information Processing; Membrane Transport; Transporters|Environmental Information Processing; Signal Transduction; Two-component system	Human Diseases	Infectious Diseases	Staphylococcus aureus infection	-1	1	1	0	0	2.07403e-08	0	0	0	0	0	0	0	0	0	0	0	0	0	8.50386e-09	0	0	0	0	0	0	0	0	0	0	0	0	9.60589e-09	0	0	0	0	0	0	0	0
K09814	hemin transport system ATP-binding protein [EC:3.6.3.-]	hemin transport system ATP-binding protein [EC:3.6.3.-]	hemin transport system ATP-binding protein	EC:3.6.3.-	Environmental Information Processing; Membrane Transport; ABC transporters|Environmental Information Processing; Membrane Transport; Transporters	Environmental Information Processing	Membrane Transport	ABC transporters	-1	1	1	0	0	2.07403e-08	0	0	0	0	0	0	0	0	0	0	0	0	0	8.50386e-09	0	0	0	0	0	0	0	0	0	0	0	0	1.92118e-08	0	0	0	0	0	0	0	0
K09813	hemin transport system permease protein	hemin transport system permease protein	hemin transport system permease protein	0	Environmental Information Processing; Membrane Transport; ABC transporters|Environmental Information Processing; Membrane Transport; Transporters	Environmental Information Processing	Membrane Transport	ABC transporters	-1	1	1	0	0	2.07403e-08	0	0	0	0	0	0	0	0	0	0	0	0	0	8.50386e-09	0	0	0	0	0	0	0	0	0	0	0	0	1.92118e-08	0	0	0	0	0	0	0	0
K10022	arginine/ornithine transport system substrate-binding protein	arginine/ornithine transport system substrate-binding protein	arginine/ornithine transport system substrate-binding protein	0	Environmental Information Processing; Membrane Transport; ABC transporters|Environmental Information Processing; Membrane Transport; Transporters	Environmental Information Processing	Membrane Transport	ABC transporters	-1	1	1	0	0	0	0	0	0	0	0	1.58588e-08	0	0	0	0	0	0	0	0	0	0	0	0	1.78886e-08	0	0	0	9.69181e-09	0	0	0	0	0	0	0	0	0	0	1.64863e-08	0
K03302	anaerobic C4-dicarboxylate transporter, Dcu family	anaerobic C4-dicarboxylate transporter, Dcu family	anaerobic C4-dicarboxylate transporter, Dcu family	0	Unclassified; Cellular Processes and Signaling; Other ion-coupled transporters	Unclassified	Cellular Processes and Signaling	Other ion-coupled transporters	-1	1	1	0	0	2.07403e-08	0	0	0	0	0	0	0	0	0	0	0	0	0	8.50386e-09	0	0	0	0	0	0	0	0	0	0	0	0	9.60589e-09	0	0	0	0	0	0	0	0
K12552	penicillin-binding protein 1 [EC:3.4.-.-]	penicillin-binding protein 1 [EC:3.4.-.-]	penicillin-binding protein 1	EC:3.4.-.-	Metabolism; Glycan Biosynthesis and Metabolism; Peptidoglycan biosynthesis	Metabolism	Glycan Biosynthesis and Metabolism	Peptidoglycan biosynthesis	-1	1	1	0	0	2.07403e-08	0	0	0	0	0	0	0	0	0	0	0	0	0	8.50386e-09	0	0	0	0	0	0	0	0	0	0	0	0	1.92118e-08	0	0	0	0	0	0	0	0
K12553	penicillin-binding protein 3 [EC:3.4.-.-]	penicillin-binding protein 3 [EC:3.4.-.-]	penicillin-binding protein 3	EC:3.4.-.-	Metabolism; Glycan Biosynthesis and Metabolism; Peptidoglycan biosynthesis	Metabolism	Glycan Biosynthesis and Metabolism	Peptidoglycan biosynthesis	-1	1	1	0	0	2.07403e-08	0	0	0	0	0	0	0	0	0	0	0	0	0	8.50386e-09	0	0	0	0	0	0	0	0	0	0	0	0	1.92118e-08	0	0	0	0	0	0	0	0
K12551	transglycosylase [EC:2.4.1.-]	transglycosylase [EC:2.4.1.-]	transglycosylase	EC:2.4.1.-	Metabolism; Glycan Biosynthesis and Metabolism; Glycosyltransferases|Metabolism; Glycan Biosynthesis and Metabolism; Peptidoglycan biosynthesis	Metabolism	Glycan Biosynthesis and Metabolism	Glycosyltransferases	-1	1	1	0	0	2.07403e-08	0	0	0	0	0	0	0	0	0	0	0	0	0	8.50386e-09	0	0	0	0	0	0	0	0	0	0	0	0	1.92118e-08	0	0	0	0	0	0	0	0
K00491	nitric-oxide synthase, bacterial [EC:1.14.13.39]	nitric-oxide synthase, bacterial [EC:1.14.13.39]	nitric-oxide synthase, bacterial	EC:1.14.13.39	Metabolism; Amino Acid Metabolism; Arginine and proline metabolism	Metabolism	Amino Acid Metabolism	Arginine and proline metabolism	-1	1	1	0	0	2.07403e-08	0	0	0	0	0	0	0	0	0	0	0	0	0	8.50386e-09	0	0	0	0	0	0	0	0	0	0	0	0	1.92118e-08	0	0	0	0	0	0	0	0
K10810	transcriptional regulator TenI	transcriptional regulator TenI	transcriptional regulator TenI	0	Genetic Information Processing; Transcription; Transcription factors	Genetic Information Processing	Transcription	Transcription factors	-1	1	1	0	0	2.07403e-08	0	0	0	0	0	0	0	0	0	0	0	0	0	8.50386e-09	0	0	0	0	0	0	0	0	0	0	0	0	1.92118e-08	0	0	0	0	0	0	0	0
K04478	monofunctional glycosyltransferase [EC:2.4.1.-]	monofunctional glycosyltransferase [EC:2.4.1.-]	monofunctional glycosyltransferase	EC:2.4.1.-	Metabolism; Glycan Biosynthesis and Metabolism; Glycosyltransferases|Metabolism; Glycan Biosynthesis and Metabolism; Peptidoglycan biosynthesis	Metabolism	Glycan Biosynthesis and Metabolism	Glycosyltransferases	-1	1	1	0	0	2.07403e-08	0	0	0	0	0	0	0	0	0	0	0	0	0	8.50386e-09	0	0	0	0	0	0	0	0	0	0	0	0	1.92118e-08	0	0	0	0	0	0	0	0
K10851	nitrogen regulatory protein A	nitrogen regulatory protein A	nitrogen regulatory protein A	0	Environmental Information Processing; Signal Transduction; Two-component system	Environmental Information Processing	Signal Transduction	Two-component system	-1	1	1	0	0	2.07403e-08	0	0	0	0	0	0	0	0	0	0	0	0	0	8.50386e-09	0	0	0	0	0	0	0	0	0	0	0	0	1.92118e-08	0	0	0	0	0	0	0	0
K10850	MFS transporter, NNP family, putative nitrate transporter	MFS transporter, NNP family, putative nitrate transporter	MFS transporter, NNP family, putative nitrate transporter	0	Environmental Information Processing; Membrane Transport; Transporters|Environmental Information Processing; Signal Transduction; Two-component system	Environmental Information Processing	Membrane Transport	Transporters	-1	1	1	0	0	2.07403e-08	0	0	0	0	0	0	0	0	0	0	0	0	0	8.50386e-09	0	0	0	0	0	0	0	0	0	0	0	0	1.92118e-08	0	0	0	0	0	0	0	0
K12254	4-guanidinobutyraldehyde dehydrogenase / NAD-dependent aldehyde dehydrogenase [EC:1.2.1.54 1.2.1.-]	4-guanidinobutyraldehyde dehydrogenase / NAD-dependent aldehyde dehydrogenase [EC:1.2.1.54 1.2.1.-]	4-guanidinobutyraldehyde dehydrogenase / NAD-dependent aldehyde dehydrogenase	EC:1.2.1.54	Metabolism; Amino Acid Metabolism; Arginine and proline metabolism	Metabolism	Amino Acid Metabolism	Arginine and proline metabolism	-1	1	1	0	0	0	0	0	0	0	0	1.58588e-08	0	0	0	0	0	0	0	0	0	0	0	0	1.78886e-08	0	0	0	9.69181e-09	0	0	0	0	0	0	0	0	0	0	1.64863e-08	0
K02829	cytochrome aa3-600 menaquinol oxidase subunit IV [EC:1.10.3.12]; quinol oxidase polypeptide IV [EC:1.9.3.-]	cytochrome aa3-600 menaquinol oxidase subunit IV [EC:1.10.3.12]; quinol oxidase polypeptide IV [EC:1.9.3.-]	cytochrome aa3-600 menaquinol oxidase subunit IV	EC:1.10.3.12	Metabolism; Energy Metabolism; Oxidative phosphorylation	Metabolism	Energy Metabolism	Oxidative phosphorylation	-1	1	1	0	0	2.07403e-08	0	0	0	0	0	0	0	0	0	0	0	0	0	8.50386e-09	0	0	0	0	0	0	0	0	0	0	0	0	1.92118e-08	0	0	0	0	0	0	0	0
K02827	quinol oxidase polypeptide I [EC:1.9.3.-]; cytochrome aa3-600 menaquinol oxidase subunit I [EC:1.10.3.12]	quinol oxidase polypeptide I [EC:1.9.3.-]; cytochrome aa3-600 menaquinol oxidase subunit I [EC:1.10.3.12]	quinol oxidase polypeptide I	EC:1.9.3.-	Metabolism; Energy Metabolism; Oxidative phosphorylation	Metabolism	Energy Metabolism	Oxidative phosphorylation	-1	1	1	0	0	2.07403e-08	0	0	0	0	0	0	0	0	0	0	0	0	0	8.50386e-09	0	0	0	0	0	0	0	0	0	0	0	0	1.92118e-08	0	0	0	0	0	0	0	0
K02826	cytochrome aa3-600 menaquinol oxidase subunit II [EC:1.10.3.12]; quinol oxidase polypeptide II [EC:1.9.3.-]	cytochrome aa3-600 menaquinol oxidase subunit II [EC:1.10.3.12]; quinol oxidase polypeptide II [EC:1.9.3.-]	cytochrome aa3-600 menaquinol oxidase subunit II	EC:1.10.3.12	Metabolism; Energy Metabolism; Oxidative phosphorylation	Metabolism	Energy Metabolism	Oxidative phosphorylation	-1	1	1	0	0	2.07403e-08	0	0	0	0	0	0	0	0	0	0	0	0	0	8.50386e-09	0	0	0	0	0	0	0	0	0	0	0	0	1.92118e-08	0	0	0	0	0	0	0	0
K01406	serralysin [EC:3.4.24.40]	serralysin [EC:3.4.24.40]	serralysin	EC:3.4.24.40	Metabolism; Enzyme Families; Peptidases	Metabolism	Enzyme Families	Peptidases	-1	1	1	0	0	0	0	0	0	0	0	1.58588e-08	0	0	0	0	0	0	0	0	0	0	0	0	1.78886e-08	0	0	0	9.69181e-09	0	1.55635e-08	0	1.92118e-08	0	0	0	0	0	0	1.64863e-08	0
							Enzyme Families	4
							Nucleotide Metabolism	1
							Metabolism of Terpenoids and Polyketides	4
							Metabolism of Cofactors and Vitamins	1
							ABC transporters	3
							Secretion system	3
							Carbohydrate Metabolism	1
							Amino Acid Metabolism	5
							Lipid Metabolism	0
							Energy Metabolism	4
							Cell Motility	0
							Metabolism of Other Amino Acids	0
							Transcription	0
							Signal Transduction	3
							Glycan Biosynthesis and Metabolism	6
							Cellular Processes and Signaling	4
							Xenobiotics Biodegradation and Metabolism	1
							Genetic Information Processing	1
							Metabolism of Other Amino Acids	0
							Signaling Molecules and Interaction	0
							Others	13
[truncated: 11 more columns]

## Sheet: Cat 3
This sheet contains the data of the statistically different PiCrust Data (normalized) belonging to Category 3
KO ID	Name	KEGG_Description	Protein	EC	KEGG_Pathways	KEGG_Pathways_1	KEGG_Pathways_2	KEGG_Pathways_3	Comparison Age8 - Age 18	Comparison Age8 - Age 24	Comparison Age18 - Age 24	Age 8	Age 8	Age 8	Age 8	Age 8	Age 8	Age 8	Age 8	Age 8	Age 8	Age 18	Age 18	Age 18	Age 18	Age 18	Age 18	Age 18	Age 18	Age 18	Age 18	Age 20	Age 20	Age 20	Age 20	Age 20	Age 20	Age 20	Age 20	Age 20	Age 20	Age 22	Age 22	Age 22	Age 22	Age 22	Age 22	Age 22	Age 22
K02319	DNA polymerase I [EC:2.7.7.7]	DNA polymerase I [EC:2.7.7.7]	DNA polymerase I	EC:2.7.7.7	Metabolism; Nucleotide Metabolism; Pyrimidine metabolism|Metabolism; Nucleotide Metabolism; Purine metabolism|Genetic Information Processing; Replication and Repair; DNA replication proteins	Metabolism	Nucleotide Metabolism	Pyrimidine metabolism	-1	-1	1	0	0	0	0	0	0	2.32067e-08	2.15452e-08	0	0	0	0	0	0	0	0	0	0	0	0	0	0	2.82933e-08	0	0	0	0	0	0	9.60589e-09	0	1.20023e-08	0	0	0	0	1.64863e-08	0
K03231	elongation factor EF-1 alpha subunit [EC:3.6.5.3]; elongation factor 1-alpha	elongation factor EF-1 alpha subunit [EC:3.6.5.3]; elongation factor 1-alpha	elongation factor EF-1 alpha subunit	EC:3.6.5.3	Genetic Information Processing; Translation; Translation factors|Genetic Information Processing; Translation; RNA transport	Genetic Information Processing	Translation	Translation factors	-1	-1	1	0	0	0	0	0	0	2.32067e-08	2.15452e-08	0	0	0	0	0	0	0	0	0	0	0	0	0	0	2.82933e-08	0	0	0	0	0	0	9.60589e-09	0	1.20023e-08	0	0	0	0	1.64863e-08	0
K05345	putative cyclase [EC:4.6.1.-]	putative cyclase [EC:4.6.1.-]	putative cyclase	EC:4.6.1.-	Unclassified; Metabolism; Others	Unclassified	Metabolism	Others	-1	-1	1	2.55007e-08	5.05811e-08	2.07403e-08	1.17334e-08	0	0	5.80167e-08	9.69533e-08	4.75763e-08	3.68427e-08	0	0	0	2.33996e-08	1.05175e-08	0	0	1.28672e-08	0	1.14942e-08	0	1.78886e-08	2.82933e-08	3.03181e-08	0	9.69181e-09	1.91129e-08	7.78177e-09	7.24216e-09	0	1.77253e-08	0	0	2.84464e-08	0	0	0	0
K07466	replication factor A1	replication factor A1	replication factor A1	0	Genetic Information Processing; Replication and Repair; DNA repair and recombination proteins|Genetic Information Processing; Replication and Repair; Mismatch repair|Genetic Information Processing; Transcription; Transcription factors|Genetic Information Processing; Replication and Repair; Nucleotide excision repair|Genetic Information Processing; Replication and Repair; DNA replication|Genetic I…	Genetic Information Processing	Replication and Repair	DNA repair and recombination proteins	-1	-1	1	0	0	0	0	0	0	2.32067e-08	2.15452e-08	0	0	0	0	0	0	0	0	0	0	0	0	0	0	2.82933e-08	0	0	0	0	0	0	9.60589e-09	0	1.20023e-08	0	0	0	0	1.64863e-08	0
K07463	archaea-specific RecJ-like exonuclease	archaea-specific RecJ-like exonuclease	archaea-specific RecJ-like exonuclease	0	Unclassified; Genetic Information Processing; Replication, recombination and repair proteins	Unclassified	Genetic Information Processing	Replication, recombination and repair proteins	-1	-1	1	0	0	0	0	0	0	2.32067e-08	2.15452e-08	0	0	0	0	0	0	0	0	0	0	0	0	0	0	2.82933e-08	0	0	0	0	0	0	9.60589e-09	0	1.20023e-08	0	0	0	0	1.64863e-08	0
K00693	glycogen(starch) synthase [EC:2.4.1.11]	glycogen(starch) synthase [EC:2.4.1.11]	glycogen(starch) synthase	EC:2.4.1.11	Metabolism; Glycan Biosynthesis and Metabolism; Glycosyltransferases|Metabolism; Carbohydrate Metabolism; Starch and sucrose metabolism|Organismal Systems; Endocrine System; Insulin signaling pathway	Metabolism	Glycan Biosynthesis and Metabolism	Glycosyltransferases	-1	-1	1	2.55007e-08	5.05811e-08	2.07403e-08	1.17334e-08	0	0	5.80167e-08	9.69533e-08	4.75763e-08	3.68427e-08	0	0	0	0	1.05175e-08	0	0	1.28672e-08	0	1.14942e-08	0	1.78886e-08	2.82933e-08	3.03181e-08	0	9.69181e-09	1.91129e-08	7.78177e-09	0	0	1.77253e-08	0	0	2.84464e-08	0	0	0	0
K06026	None	None	None	0	Unclassified; Metabolism; Others	Unclassified	Metabolism	Others	-1	-1	1	2.55007e-08	5.05811e-08	2.07403e-08	1.17334e-08	0	0	5.80167e-08	9.69533e-08	4.75763e-08	3.68427e-08	0	0	0	0	1.05175e-08	0	0	1.28672e-08	0	1.14942e-08	0	1.78886e-08	2.82933e-08	3.03181e-08	0	9.69181e-09	1.91129e-08	7.78177e-09	0	0	1.77253e-08	0	0	2.84464e-08	0	0	0	0
K03124	transcription initiation factor TFIIB	transcription initiation factor TFIIB	transcription initiation factor TFIIB	0	Genetic Information Processing; Transcription; Transcription machinery|Genetic Information Processing; Transcription; Basal transcription factors	Genetic Information Processing	Transcription	Transcription machinery	-1	-1	1	0	0	0	0	0	0	2.32067e-08	2.15452e-08	0	0	0	0	0	0	0	0	0	0	0	0	0	0	2.82933e-08	0	0	0	0	0	0	9.60589e-09	0	1.20023e-08	0	0	0	0	1.64863e-08	0
K00011	aldehyde reductase [EC:1.1.1.21]	aldehyde reductase [EC:1.1.1.21]	aldehyde reductase	EC:1.1.1.21	Metabolism; Carbohydrate Metabolism; Fructose and mannose metabolism|Metabolism; Carbohydrate Metabolism; Pyruvate metabolism|Metabolism; Carbohydrate Metabolism; Pentose and glucuronate interconversions|Metabolism; Lipid Metabolism; Glycerolipid metabolism|Metabolism; Carbohydrate Metabolism; Galactose metabolism	Metabolism	Carbohydrate Metabolism	Fructose and mannose metabolism	-1	-1	1	1.27503e-08	0	0	2.34669e-08	0	1.08042e-08	1.16033e-08	1.07726e-08	1.58588e-08	5.5264e-08	0	0	1.09115e-08	0	0	0	0	1.28672e-08	0	3.44826e-08	0	0	0	0	0	9.69181e-09	1.91129e-08	0	7.24216e-09	0	1.77253e-08	0	0	0	0	0	0	1.00284e-08
K00293	saccharopine dehydrogenase (NADP+, L-glutamate forming) [EC:1.5.1.10]	saccharopine dehydrogenase (NADP+, L-glutamate forming) [EC:1.5.1.10]	saccharopine dehydrogenase (NADP+, L-glutamate forming)	EC:1.5.1.10	Metabolism; Amino Acid Metabolism; Lysine degradation|Metabolism; Amino Acid Metabolism; Lysine biosynthesis	Metabolism	Amino Acid Metabolism	Lysine degradation	-1	-1	1	2.55007e-08	5.05811e-08	2.07403e-08	1.17334e-08	0	0	5.80167e-08	9.69533e-08	4.75763e-08	3.68427e-08	0	0	0	0	1.05175e-08	0	0	1.28672e-08	0	1.14942e-08	0	1.78886e-08	2.82933e-08	3.03181e-08	0	9.69181e-09	1.91129e-08	7.78177e-09	0	0	1.77253e-08	0	0	2.84464e-08	0	0	0	0
K01170	tRNA-intron endonuclease, archaea type [EC:3.1.27.9]; tRNA-intron endonuclease [EC:3.1.27.9]	tRNA-intron endonuclease, archaea type [EC:3.1.27.9]; tRNA-intron endonuclease [EC:3.1.27.9]	tRNA-intron endonuclease, archaea type	EC:3.1.27.9	Unclassified; Genetic Information Processing; Translation proteins	Unclassified	Genetic Information Processing	Translation proteins	-1	-1	1	0	0	0	0	0	0	2.32067e-08	2.15452e-08	0	0	0	0	0	0	0	0	0	0	0	0	0	0	2.82933e-08	0	0	0	0	0	0	9.60589e-09	0	1.20023e-08	0	0	0	0	1.64863e-08	0
K05971	None	None	None	0	Unclassified; Metabolism; Others	Unclassified	Metabolism	Others	-1	-1	1	2.55007e-08	0	0	4.69338e-08	0	2.16084e-08	2.32067e-08	2.15452e-08	3.17175e-08	1.10528e-07	0	0	2.18231e-08	0	0	0	0	2.57344e-08	0	6.89652e-08	0	0	0	0	0	1.93836e-08	3.82259e-08	0	1.44843e-08	0	3.54505e-08	0	0	0	0	0	0	2.00568e-08
K00300	None	None	None	0	Unclassified; Metabolism; Others	Unclassified	Metabolism	Others	-1	-1	1	1.27503e-08	0	0	2.34669e-08	0	1.08042e-08	1.16033e-08	1.07726e-08	1.58588e-08	5.5264e-08	0	0	1.09115e-08	0	0	0	0	1.28672e-08	0	3.44826e-08	0	0	0	0	0	9.69181e-09	1.91129e-08	0	7.24216e-09	0	1.77253e-08	0	0	0	0	0	0	1.00284e-08
K02641	ferredoxin--NADP+ reductase [EC:1.18.1.2]	ferredoxin--NADP+ reductase [EC:1.18.1.2]	ferredoxin--NADP+ reductase	EC:1.18.1.2	Metabolism; Energy Metabolism; Photosynthesis proteins|Metabolism; Energy Metabolism; Photosynthesis	Metabolism	Energy Metabolism	Photosynthesis proteins	-1	-1	1	1.27503e-08	0	0	2.34669e-08	0	1.08042e-08	1.16033e-08	1.07726e-08	1.58588e-08	5.5264e-08	0	0	1.09115e-08	0	0	0	0	1.28672e-08	0	3.44826e-08	0	0	0	0	0	9.69181e-09	1.91129e-08	0	7.24216e-09	0	1.77253e-08	0	0	0	0	0	0	1.00284e-08
K08977	putative membrane protein	putative membrane protein	putative membrane protein	0	Unclassified; Poorly Characterized; Function unknown	Unclassified	Poorly Characterized	Function unknown	-1	-1	1	2.55007e-08	5.05811e-08	2.07403e-08	1.17334e-08	0	0	5.80167e-08	9.69533e-08	4.75763e-08	3.68427e-08	0	0	0	0	1.05175e-08	0	0	1.28672e-08	0	1.14942e-08	0	1.78886e-08	2.82933e-08	3.03181e-08	0	9.69181e-09	1.91129e-08	7.78177e-09	0	0	1.77253e-08	0	0	2.84464e-08	0	0	0	0
K13525	transitional endoplasmic reticulum ATPase	transitional endoplasmic reticulum ATPase	transitional endoplasmic reticulum ATPase	0	Genetic Information Processing; Folding, Sorting and Degradation; Protein processing in endoplasmic reticulum	Genetic Information Processing	Folding, Sorting and Degradation	Protein processing in endoplasmic reticulum	-1	-1	1	0	0	0	0	0	0	2.32067e-08	2.15452e-08	0	0	0	0	0	0	0	0	0	0	0	0	0	0	2.82933e-08	0	0	0	0	0	0	9.60589e-09	0	1.20023e-08	0	0	0	0	1.64863e-08	0
K01970	None	None	None	0	Unclassified; Metabolism; Others	Unclassified	Metabolism	Others	-1	-1	1	2.55007e-08	5.05811e-08	2.07403e-08	1.17334e-08	0	0	5.80167e-08	9.69533e-08	4.75763e-08	3.68427e-08	0	0	0	0	1.05175e-08	0	0	1.28672e-08	0	1.14942e-08	0	1.78886e-08	2.82933e-08	3.03181e-08	0	9.69181e-09	1.91129e-08	7.78177e-09	0	0	1.77253e-08	0	0	2.84464e-08	0	0	0	0
K11437	protein arginine N-methyltransferase 6 [EC:2.1.1.-]	protein arginine N-methyltransferase 6 [EC:2.1.1.-]	protein arginine N-methyltransferase 6	EC:2.1.1.-	Genetic Information Processing; Replication and Repair; Chromosome	Genetic Information Processing	Replication and Repair	Chromosome	-1	-1	1	1.27503e-08	0	0	2.34669e-08	0	1.08042e-08	1.16033e-08	1.07726e-08	1.58588e-08	5.5264e-08	0	0	1.09115e-08	0	0	0	0	1.28672e-08	0	3.44826e-08	0	0	0	0	0	9.69181e-09	1.91129e-08	0	7.24216e-09	0	1.77253e-08	0	0	0	0	0	0	1.00284e-08
K07055	; tRNA wybutosine-synthesizing protein 2 [EC:2.1.1.-]	; tRNA wybutosine-synthesizing protein 2 [EC:2.1.1.-]	; tRNA wybutosine-synthesizing protein 2	EC:2.1.1.-	Unclassified; Poorly Characterized; General function prediction only	Unclassified	Poorly Characterized	General function prediction only	-1	-1	1	0	0	0	0	0	0	2.32067e-08	2.15452e-08	0	0	0	0	0	0	0	0	0	0	0	0	0	0	2.82933e-08	0	0	0	0	0	0	9.60589e-09	0	1.20023e-08	0	0	0	0	1.64863e-08	0
K10725	archaeal cell division control protein 6	archaeal cell division control protein 6	archaeal cell division control protein 6	0	Genetic Information Processing; Replication and Repair; DNA replication proteins	Genetic Information Processing	Replication and Repair	DNA replication proteins	-1	-1	1	0	0	0	0	0	0	2.32067e-08	2.15452e-08	0	0	0	0	0	0	0	0	0	0	0	0	0	0	2.82933e-08	0	0	0	0	0	0	9.60589e-09	0	1.20023e-08	0	0	0	0	1.64863e-08	0
K00590	site-specific DNA-methyltransferase (cytosine-N4-specific) [EC:2.1.1.113]	site-specific DNA-methyltransferase (cytosine-N4-specific) [EC:2.1.1.113]	site-specific DNA-methyltransferase (cytosine-N4-specific)	EC:2.1.1.113	Unclassified; Genetic Information Processing; Replication, recombination and repair proteins	Unclassified	Genetic Information Processing	Replication, recombination and repair proteins	-1	-1	1	1.27503e-08	0	0	2.34669e-08	0	1.08042e-08	1.16033e-08	1.07726e-08	1.58588e-08	5.5264e-08	0	0	1.09115e-08	0	0	0	0	1.28672e-08	0	3.44826e-08	0	0	0	0	0	9.69181e-09	1.91129e-08	0	7.24216e-09	0	1.77253e-08	0	0	0	0	0	0	1.00284e-08
							Enzyme Families	0
							Nucleotide Metabolism	1
							Metabolism of Terpenoids and Polyketides	0
							Metabolism of Cofactors and Vitamins	0
							ABC transporters	0
							Secretion system	0
							Carbohydrate Metabolism	1
							Amino Acid Metabolism	1
							Lipid Metabolism	0
							Energy Metabolism	1
							Cell Motility	0
							Metabolism of Other Amino Acids	0
							Transcription	1
							Signal Transduction	0
							Glycan Biosynthesis and Metabolism	1
							Cellular Processes and Signaling	0
							Xenobiotics Biodegradation and Metabolism	0
							Genetic Information Processing	1
							Metabolism of Other Amino Acids	0
							Signaling Molecules and Interaction	0
							Others	14
[truncated: 11 more columns]

## Sheet: Cat 4
This sheet contains the data of the statistically different PiCrust Data (normalized) belonging to Category 4
KO ID	Name	KEGG_Description	Protein	EC	KEGG_Pathways	KEGG_Pathways_1	KEGG_Pathways_2	KEGG_Pathways_3	Comparison Age8 - Age 18	Comparison Age8 - Age 24	Comparison Age18 - Age 24	Age 8	Age 8	Age 8	Age 8	Age 8	Age 8	Age 8	Age 8	Age 8	Age 8	Age 18	Age 18	Age 18	Age 18	Age 18	Age 18	Age 18	Age 18	Age 18	Age 18	Age 20	Age 20	Age 20	Age 20	Age 20	Age 20	Age 20	Age 20	Age 20	Age 20	Age 22	Age 22	Age 22	Age 22	Age 22	Age 22	Age 22	Age 22
K00810	None	None	None	0	Unclassified; Metabolism; Metabolism of cofactors and vitamins	Unclassified	Metabolism	Metabolism of cofactors and vitamins	1	1	-1	0	0	0	0	0	0	0	0	0	0	0	1.94043e-08	0	0	1.05175e-08	0	8.50386e-09	1.28672e-08	0	0	0	0	0	1.5159e-08	0	0	0	7.78177e-09	0	0	0	0	0	0	0	0	0	0
K03932	polyhydroxybutyrate depolymerase	polyhydroxybutyrate depolymerase	polyhydroxybutyrate depolymerase	0	Unclassified; Metabolism; Biosynthesis and biodegradation of secondary metabolites	Unclassified	Metabolism	Biosynthesis and biodegradation of secondary metabolites	1	1	-1	0	1.68604e-08	0	1.17334e-08	0	0	0	0	0	0	0	1.94043e-08	0	2.33996e-08	3.15525e-08	0	1.70077e-08	1.28672e-08	0	0	0	0	1.41466e-08	1.5159e-08	1.49586e-08	0	0	7.78177e-09	0	1.92118e-08	0	0	1.67492e-08	0	1.37165e-08	0	0	2.00568e-08
K00469	inositol oxygenase [EC:1.13.99.1]	inositol oxygenase [EC:1.13.99.1]	inositol oxygenase	EC:1.13.99.1	Metabolism; Carbohydrate Metabolism; Inositol phosphate metabolism|Metabolism; Carbohydrate Metabolism; Ascorbate and aldarate metabolism	Metabolism	Carbohydrate Metabolism	Inositol phosphate metabolism	1	1	-1	0	0	0	0	0	0	0	0	0	0	0	0	0	2.33996e-08	0	0	0	0	0	0	0	0	0	0	0	0	0	0	0	0	0	0	0	0	0	0	0	1.00284e-08
K10843	DNA excision repair protein ERCC-3 [EC:3.6.4.12]; DNA excision repair protein ERCC-3 [EC:3.6.1.-]	DNA excision repair protein ERCC-3 [EC:3.6.4.12]; DNA excision repair protein ERCC-3 [EC:3.6.1.-]	DNA excision repair protein ERCC-3	EC:3.6.4.12	Genetic Information Processing; Replication and Repair; Nucleotide excision repair|Genetic Information Processing; Transcription; Transcription machinery|Genetic Information Processing; Transcription; Basal transcription factors|Genetic Information Processing; Replication and Repair; DNA repair and recombination proteins	Genetic Information Processing	Replication and Repair	Nucleotide excision repair	1	1	-1	0	1.68604e-08	0	1.17334e-08	0	0	0	0	0	0	0	1.94043e-08	0	0	3.15525e-08	0	8.50386e-09	1.28672e-08	0	0	0	0	1.41466e-08	1.5159e-08	0	0	0	7.78177e-09	0	9.60589e-09	0	0	0	0	0	0	0	1.00284e-08
K07465	putative RecB family exonuclease	putative RecB family exonuclease	putative RecB family exonuclease	0	Unclassified; Genetic Information Processing; Replication, recombination and repair proteins	Unclassified	Genetic Information Processing	Replication, recombination and repair proteins	1	1	-1	0	1.68604e-08	0	1.17334e-08	0	0	0	0	0	0	0	1.94043e-08	0	0	3.15525e-08	0	8.50386e-09	1.28672e-08	0	0	0	0	1.41466e-08	1.5159e-08	0	0	0	7.78177e-09	0	9.60589e-09	0	0	0	0	0	0	0	1.00284e-08
K12139	hydrogenase-4 component D [EC:1.-.-.-]	hydrogenase-4 component D [EC:1.-.-.-]	hydrogenase-4 component D	EC:1.-.-.-	Unclassified; Metabolism; Energy metabolism	Unclassified	Metabolism	Energy metabolism	1	1	-1	0	0	0	0	0	1.08042e-08	0	0	0	0	0	1.94043e-08	0	0	1.05175e-08	0	8.50386e-09	1.28672e-08	0	0	0	1.78886e-08	1.41466e-08	0	0	0	0	1.55635e-08	0	1.92118e-08	0	6.00113e-09	0	0	0	0	0	0
K06216	putative ribose uptake protein	putative ribose uptake protein	putative ribose uptake protein	0	Unclassified; Cellular Processes and Signaling; Other ion-coupled transporters	Unclassified	Cellular Processes and Signaling	Other ion-coupled transporters	1	1	-1	0	0	0	0	0	0	0	0	0	0	0	0	0	0	4.207e-08	0	0	1.28672e-08	1.11979e-08	1.14942e-08	0	0	0	0	1.49586e-08	0	0	0	7.24216e-09	9.60589e-09	0	0	0	0	0	0	1.64863e-08	0
K13531	methylated-DNA-[protein]-cysteine S-methyltransferase [EC:2.1.1.63]	methylated-DNA-[protein]-cysteine S-methyltransferase [EC:2.1.1.63]	methylated-DNA-[protein]-cysteine S-methyltransferase	EC:2.1.1.63	Genetic Information Processing; Replication and Repair; DNA repair and recombination proteins	Genetic Information Processing	Replication and Repair	DNA repair and recombination proteins	1	1	-1	0	0	0	0	0	0	0	0	0	0	0	0	1.09115e-08	0	4.207e-08	0	0	1.28672e-08	1.11979e-08	1.14942e-08	0	0	0	0	1.49586e-08	0	0	0	7.24216e-09	9.60589e-09	0	0	0	0	0	0	1.64863e-08	0
K13530	AraC family transcriptional regulator, regulatory protein of adaptative response / methylphosphotriester-DNA alkyltransferase methyltransferase [EC:2.1.1.-]	AraC family transcriptional regulator, regulatory protein of adaptative response / methylphosphotriester-DNA alkyltransferase methyltransferase [EC:2.1.1.-]	AraC family transcriptional regulator, regulatory protein of adaptative response / methylphosphotriester-DNA alkyltransferase methyltransferase	EC:2.1.1.-	Genetic Information Processing; Transcription; Transcription factors|Genetic Information Processing; Replication and Repair; DNA repair and recombination proteins	Genetic Information Processing	Transcription	Transcription factors	1	1	-1	0	0	0	0	0	0	0	0	0	0	0	0	0	0	4.207e-08	0	0	1.28672e-08	1.11979e-08	1.14942e-08	0	0	0	0	1.49586e-08	0	0	0	7.24216e-09	9.60589e-09	0	0	0	0	0	0	1.64863e-08	0
K06351	inhibitor of KinA	inhibitor of KinA	inhibitor of KinA	0	Unclassified; Cellular Processes and Signaling; Sporulation	Unclassified	Cellular Processes and Signaling	Sporulation	1	1	-1	0	0	0	0	0	0	0	0	0	0	0	0	0	2.33996e-08	0	0	0	0	0	0	0	0	0	0	0	0	0	0	0	0	0	0	0	0	0	0	0	1.00284e-08
K08280	lipopolysaccharide O-acetyltransferase [EC:2.3.1.-]	lipopolysaccharide O-acetyltransferase [EC:2.3.1.-]	lipopolysaccharide O-acetyltransferase	EC:2.3.1.-	Metabolism; Glycan Biosynthesis and Metabolism; Lipopolysaccharide biosynthesis proteins	Metabolism	Glycan Biosynthesis and Metabolism	Lipopolysaccharide biosynthesis proteins	1	1	-1	0	0	0	0	0	0	0	0	0	0	0	0	0	2.33996e-08	0	0	0	0	0	0	0	0	0	0	0	0	0	0	0	0	0	0	0	0	0	0	0	1.00284e-08
K06597	chemosensory pili system protein ChpB (putative protein-glutamate methylesterase)	chemosensory pili system protein ChpB (putative protein-glutamate methylesterase)	chemosensory pili system protein ChpB (putative protein-glutamate methylesterase)	0	Cellular Processes; Cell Motility; Bacterial motility proteins|Environmental Information Processing; Signal Transduction; Two-component system	Cellular Processes	Cell Motility	Bacterial motility proteins	1	1	-1	0	0	0	0	1.05707e-08	0	0	0	0	0	0	0	0	2.33996e-08	0	0	8.50386e-09	0	0	0	0	0	0	0	0	0	0	0	0	0	0	0	0	0	1.37165e-08	0	0	0
K10715	two-component system, sensor histidine kinase [EC:2.7.13.3]; two-component system, sensor histidine kinase RpfC [EC:2.7.13.3]	two-component system, sensor histidine kinase [EC:2.7.13.3]; two-component system, sensor histidine kinase RpfC [EC:2.7.13.3]	two-component system, sensor histidine kinase	EC:2.7.13.3	Metabolism; Enzyme Families; Protein kinases|Environmental Information Processing; Signal Transduction; Two-component system	Metabolism	Enzyme Families	Protein kinases	1	1	-1	0	0	0	0	1.05707e-08	0	0	0	0	0	0	0	0	2.33996e-08	0	0	8.50386e-09	0	0	0	0	0	0	0	0	0	0	0	0	0	0	0	0	0	1.37165e-08	0	0	0
K00035	D-galactose 1-dehydrogenase [EC:1.1.1.48]	D-galactose 1-dehydrogenase [EC:1.1.1.48]	D-galactose 1-dehydrogenase	EC:1.1.1.48	Metabolism; Carbohydrate Metabolism; Galactose metabolism	Metabolism	Carbohydrate Metabolism	Galactose metabolism	1	1	-1	0	0	0	0	1.05707e-08	0	0	1.07726e-08	0	0	0	0	0	2.33996e-08	0	0	1.70077e-08	0	0	0	0	0	0	0	0	0	0	0	0	0	0	0	0	0	1.37165e-08	0	0	0
K03921	acyl-[acyl-carrier-protein] desaturase [EC:1.14.19.2]	acyl-[acyl-carrier-protein] desaturase [EC:1.14.19.2]	acyl-[acyl-carrier-protein] desaturase	EC:1.14.19.2	Metabolism; Lipid Metabolism; Fatty acid biosynthesis|Metabolism; Lipid Metabolism; Lipid biosynthesis proteins|Metabolism; Lipid Metabolism; Biosynthesis of unsaturated fatty acids	Metabolism	Lipid Metabolism	Fatty acid biosynthesis	1	1	-1	0	0	0	0	0	0	0	0	0	0	0	0	0	2.33996e-08	0	0	0	0	0	0	0	0	0	0	0	0	0	0	0	0	0	0	0	0	0	0	0	1.00284e-08
K08605	coccolysin [EC:3.4.24.30]	coccolysin [EC:3.4.24.30]	coccolysin	EC:3.4.24.30	Metabolism; Enzyme Families; Peptidases	Metabolism	Enzyme Families	Peptidases	1	1	-1	0	0	0	0	0	0	0	0	0	0	0	0	0	0	4.207e-08	0	0	1.28672e-08	1.11979e-08	1.14942e-08	0	0	0	0	1.49586e-08	0	0	0	7.24216e-09	9.60589e-09	0	0	0	0	0	0	1.64863e-08	0
K05281	2-hydroxyisoflavone reductase [EC:1.3.1.45]	2'-hydroxyisoflavone reductase [EC:1.3.1.45]	2'-hydroxyisoflavone reductase	EC:1.3.1.45	Metabolism; Biosynthesis of Other Secondary Metabolites; Isoflavonoid biosynthesis	Metabolism	Biosynthesis of Other Secondary Metabolites	Isoflavonoid biosynthesis	1	1	-1	0	0	0	0	1.05707e-08	0	0	0	0	0	0	0	0	2.33996e-08	0	0	8.50386e-09	0	0	0	0	0	0	0	0	0	0	0	0	0	0	0	0	0	1.37165e-08	0	0	0
K05709	small terminal subunit of phenylpropionate dioxygenase [EC:1.14.12.19]	small terminal subunit of phenylpropionate dioxygenase [EC:1.14.12.19]	small terminal subunit of phenylpropionate dioxygenase	EC:1.14.12.19	Metabolism; Amino Acid Metabolism; Phenylalanine metabolism	Metabolism	Amino Acid Metabolism	Phenylalanine metabolism	1	1	-1	0	0	0	0	0	0	0	0	0	0	0	0	0	0	0	0	8.50386e-09	0	0	1.14942e-08	0	1.78886e-08	0	1.5159e-08	1.49586e-08	9.69181e-09	0	7.78177e-09	0	9.60589e-09	0	0	0	0	1.37165e-08	0	0	0
K05708	large terminal subunit of phenylpropionate dioxygenase [EC:1.14.12.19]	large terminal subunit of phenylpropionate dioxygenase [EC:1.14.12.19]	large terminal subunit of phenylpropionate dioxygenase	EC:1.14.12.19	Metabolism; Amino Acid Metabolism; Phenylalanine metabolism	Metabolism	Amino Acid Metabolism	Phenylalanine metabolism	1	1	-1	0	0	0	0	0	0	0	0	0	0	0	0	0	0	0	0	1.70077e-08	0	0	1.14942e-08	0	1.78886e-08	0	1.5159e-08	1.49586e-08	9.69181e-09	0	7.78177e-09	0	9.60589e-09	0	0	0	0	1.37165e-08	0	0	0
K06214	curli production assembly/transport component CsgG	curli production assembly/transport component CsgG	curli production assembly/transport component CsgG	0	Environmental Information Processing; Membrane Transport; Secretion system	Environmental Information Processing	Membrane Transport	Secretion system	1	1	-1	0	0	0	0	0	0	0	0	0	0	0	0	1.09115e-08	2.33996e-08	1.05175e-08	0	0	0	0	0	0	0	0	1.5159e-08	0	0	0	0	0	9.60589e-09	0	0	0	0	2.7433e-08	0	0	1.00284e-08
K03208	colanic acid biosynthesis glycosyl transferase WcaI	colanic acid biosynthesis glycosyl transferase WcaI	colanic acid biosynthesis glycosyl transferase WcaI	0	Unclassified; Cellular Processes and Signaling; Membrane and intracellular structural molecules	Unclassified	Cellular Processes and Signaling	Membrane and intracellular structural molecules	1	1	-1	0	0	0	0	0	0	0	0	0	0	0	0	0	2.33996e-08	0	0	0	0	0	0	0	0	0	0	0	0	0	0	0	0	0	0	0	0	0	0	0	1.00284e-08
K03692	glucosylglycerol-phosphate synthase [EC:2.4.1.213]	glucosylglycerol-phosphate synthase [EC:2.4.1.213]	glucosylglycerol-phosphate synthase	EC:2.4.1.213	Unclassified; Metabolism; Carbohydrate metabolism	Unclassified	Metabolism	Carbohydrate metabolism	1	1	-1	0	0	0	0	0	0	0	0	0	0	0	0	0	2.33996e-08	0	0	0	0	0	0	0	0	0	0	0	0	0	0	0	0	0	0	0	0	0	0	0	1.00284e-08
K09650	rhomboid-like protein [EC:3.4.21.105]	rhomboid-like protein [EC:3.4.21.105]	rhomboid-like protein	EC:3.4.21.105	Metabolism; Enzyme Families; Peptidases	Metabolism	Enzyme Families	Peptidases	1	1	-1	0	0	0	0	0	0	0	0	0	0	0	0	0	2.33996e-08	0	0	0	0	0	0	0	0	0	0	0	0	0	0	0	0	0	0	0	0	0	0	0	1.00284e-08
K04712	sphingolipid delta-4 desaturase [EC:1.14.-.-]	sphingolipid delta-4 desaturase [EC:1.14.-.-]	sphingolipid delta-4 desaturase	EC:1.14.-.-	Metabolism; Lipid Metabolism; Lipid biosynthesis proteins|Metabolism; Lipid Metabolism; Sphingolipid metabolism	Metabolism	Lipid Metabolism	Lipid biosynthesis proteins	1	1	-1	0	0	0	0	0	0	0	0	0	0	0	0	0	2.33996e-08	0	0	0	0	0	0	0	0	0	0	0	0	0	0	0	0	0	0	0	0	0	0	0	1.00284e-08
K13815	two-component system, response regulator RpfG	two-component system, response regulator RpfG	two-component system, response regulator RpfG	0	Environmental Information Processing; Signal Transduction; Two-component system	Environmental Information Processing	Signal Transduction	Two-component system	1	1	-1	0	0	0	0	1.05707e-08	0	0	0	0	0	0	0	0	2.33996e-08	0	0	8.50386e-09	0	0	0	0	0	0	0	0	0	0	0	0	0	0	0	0	0	1.37165e-08	0	0	0
K01283	peptidyl-dipeptidase A [EC:3.4.15.1]	peptidyl-dipeptidase A [EC:3.4.15.1]	peptidyl-dipeptidase A	EC:3.4.15.1	Metabolism; Enzyme Families; Peptidases|Human Diseases; Infectious Diseases; Chagas disease (American trypanosomiasis)|Organismal Systems; Endocrine System; Renin-angiotensin system|Environmental Information Processing; Signaling Molecules and Interaction; Cellular antigens|Human Diseases; Cardiovascular Diseases; Hypertrophic cardiomyopathy (HCM)	Metabolism	Enzyme Families	Peptidases	1	1	-1	0	0	0	0	1.05707e-08	0	0	0	0	0	0	0	0	2.33996e-08	0	0	1.70077e-08	0	0	0	0	0	0	0	0	0	0	0	0	0	0	0	0	0	1.37165e-08	0	0	0
K07228	TrkA domain protein	TrkA domain protein	TrkA domain protein	0	Unclassified; Cellular Processes and Signaling; Inorganic ion transport and metabolism	Unclassified	Cellular Processes and Signaling	Inorganic ion transport and metabolism	1	1	-1	0	0	0	0	0	0	0	0	0	0	0	0	0	2.33996e-08	0	0	0	0	0	0	0	0	0	0	0	0	0	0	0	0	0	0	0	0	0	0	0	1.00284e-08
K04756	alkyl hydroperoxide reductase subunit D	alkyl hydroperoxide reductase subunit D	alkyl hydroperoxide reductase subunit D	0	Unclassified; Poorly Characterized; Function unknown	Unclassified	Poorly Characterized	Function unknown	1	1	-1	0	1.68604e-08	0	1.17334e-08	0	0	0	0	0	0	0	1.94043e-08	0	0	3.15525e-08	0	1.70077e-08	1.28672e-08	0	1.14942e-08	0	1.78886e-08	1.41466e-08	1.5159e-08	1.49586e-08	9.69181e-09	0	7.78177e-09	0	1.92118e-08	0	0	0	0	1.37165e-08	0	0	1.00284e-08
K13238	3,2-trans-enoyl-CoA isomerase, mitochondrial [EC:5.3.3.8]	3,2-trans-enoyl-CoA isomerase, mitochondrial [EC:5.3.3.8]	3,2-trans-enoyl-CoA isomerase, mitochondrial	EC:5.3.3.8	Metabolism; Lipid Metabolism; Fatty acid metabolism	Metabolism	Lipid Metabolism	Fatty acid metabolism	1	1	-1	0	0	0	0	0	0	0	0	0	0	0	0	0	2.33996e-08	0	0	0	0	0	0	0	0	0	0	0	0	0	0	0	0	0	0	0	0	0	0	0	1.00284e-08
							Enzyme Families	4
							Nucleotide Metabolism	0
							Metabolism of Terpenoids and Polyketides	0
							Metabolism of Cofactors and Vitamins	0
							ABC transporters	0
							Secretion system	0
							Carbohydrate Metabolism	3
							Amino Acid Metabolism	2
							Lipid Metabolism	3
							Energy Metabolism	0
							Cell Motility	0
							Metabolism of Other Amino Acids	0
							Transcription	0
							Signal Transduction	0
							Glycan Biosynthesis and Metabolism	1
							Cellular Processes and Signaling	4
							Xenobiotics Biodegradation and Metabolism	0
							Genetic Information Processing	1
							Metabolism of Other Amino Acids	0
							Signaling Molecules and Interaction	0
							Others	11
[truncated: 11 more columns]

## Sheet: Cat 5
This sheet contains the data of the statistically different PiCrust Data (normalized) belonging to Category 5
KO ID	Name	KEGG_Description	Protein	EC	KEGG_Pathways	KEGG_Pathways_1	KEGG_Pathways_2	KEGG_Pathways_3	Comparison Age8 - Age 18	Comparison Age8 - Age 24	Comparison Age18 - Age 24	Age 8	Age 8	Age 8	Age 8	Age 8	Age 8	Age 8	Age 8	Age 8	Age 8	Age 18	Age 18	Age 18	Age 18	Age 18	Age 18	Age 18	Age 18	Age 18	Age 18	Age 20	Age 20	Age 20	Age 20	Age 20	Age 20	Age 20	Age 20	Age 20	Age 20	Age 22	Age 22	Age 22	Age 22	Age 22	Age 22	Age 22	Age 22
K07044	None	None	None	0	Unclassified; Poorly Characterized; General function prediction only	Unclassified	Poorly Characterized	General function prediction only	1	-1	-1	0	0	0	0	1.05707e-08	0	0	0	0	0	0	0	0	4.67992e-08	0	0	0	0	0	0	0	0	0	0	0	0	0	0	0	0	0	0	0	0	0	0	0	0
							Enzyme Families	0
							Nucleotide Metabolism	0
							Metabolism of Terpenoids and Polyketides	0
							Metabolism of Cofactors and Vitamins	0
							ABC transporters	0
							Secretion system	0
							Carbohydrate Metabolism	0
							Amino Acid Metabolism	0
							Lipid Metabolism	0
							Energy Metabolism	0
							Cell Motility	0
							Metabolism of Other Amino Acids	0
							Transcription	0
							Signal Transduction	0
							Glycan Biosynthesis and Metabolism	0
							Cellular Processes and Signaling	0
							Xenobiotics Biodegradation and Metabolism	0
							Genetic Information Processing	0
							Metabolism of Other Amino Acids	0
							Signaling Molecules and Interaction	0
							Others	1
[truncated: 11 more columns]

## Sheet: Cat 6
This sheet contains the data of the statistically different PiCrust Data (normalized) belonging to Category 6
KO ID	Name	KEGG_Description	Protein	EC	KEGG_Pathways	KEGG_Pathways_1	KEGG_Pathways_2	KEGG_Pathways_3	Comparison Age8 - Age 18	Comparison Age8 - Age 24	Comparison Age18 - Age 24	Age 8	Age 8	Age 8	Age 8	Age 8	Age 8	Age 8	Age 8	Age 8	Age 8	Age 18	Age 18	Age 18	Age 18	Age 18	Age 18	Age 18	Age 18	Age 18	Age 18	Age 20	Age 20	Age 20	Age 20	Age 20	Age 20	Age 20	Age 20	Age 20	Age 20	Age 22	Age 22	Age 22	Age 22	Age 22	Age 22	Age 22	Age 22
K00446	catechol 2,3-dioxygenase [EC:1.13.11.2]	catechol 2,3-dioxygenase [EC:1.13.11.2]	catechol 2,3-dioxygenase	EC:1.13.11.2	Metabolism; Xenobiotics Biodegradation and Metabolism; Xylene degradation|Metabolism; Xenobiotics Biodegradation and Metabolism; Chlorocyclohexane and chlorobenzene degradation|Metabolism; Xenobiotics Biodegradation and Metabolism; Styrene degradation|Metabolism; Xenobiotics Biodegradation and Metabolism; Benzoate degradation	Metabolism	Xenobiotics Biodegradation and Metabolism	Xylene degradation	-1	-1	-1	0	0	0	0	0	1.08042e-08	0	0	0	0	0	0	0	0	0	0	8.50386e-09	0	0	0	0	0	0	0	0	0	0	0	0	0	0	0	0	0	0	0	0	0
K14582	cis-1,2-dihydro-1,2-dihydroxynaphthalene/dibenzothiophene dihydrodiol dehydrogenase [EC:1.3.1.29 1.3.1.60]	cis-1,2-dihydro-1,2-dihydroxynaphthalene/dibenzothiophene dihydrodiol dehydrogenase [EC:1.3.1.29 1.3.1.60]	cis-1,2-dihydro-1,2-dihydroxynaphthalene/dibenzothiophene dihydrodiol dehydrogenase	EC:1.3.1.29	Metabolism; Xenobiotics Biodegradation and Metabolism; Polycyclic aromatic hydrocarbon degradation|Metabolism; Xenobiotics Biodegradation and Metabolism; Naphthalene degradation	Metabolism	Xenobiotics Biodegradation and Metabolism	Polycyclic aromatic hydrocarbon degradation	-1	-1	-1	0	0	0	0	0	1.08042e-08	0	0	0	0	0	0	0	0	0	0	8.50386e-09	0	0	0	0	0	0	0	0	0	0	0	0	0	0	0	0	0	0	0	0	0
							Enzyme Families	0
							Nucleotide Metabolism	0
							Metabolism of Terpenoids and Polyketides	0
							Metabolism of Cofactors and Vitamins	0
							ABC transporters	0
							Secretion system	0
							Carbohydrate Metabolism	0
							Amino Acid Metabolism	0
							Lipid Metabolism	0
							Energy Metabolism	0
							Cell Motility	0
							Metabolism of Other Amino Acids	0
							Transcription	0
							Signal Transduction	0
							Glycan Biosynthesis and Metabolism	0
							Cellular Processes and Signaling	0
							Xenobiotics Biodegradation and Metabolism	2
							Genetic Information Processing	0
							Metabolism of Other Amino Acids	0
							Signaling Molecules and Interaction	0
							Others	0
[truncated: 11 more columns]

## Sheet: Cat 7
This sheet contains the data of the statistically different PiCrust Data (normalized) belonging to Category 7
KO ID	Name	KEGG_Description	Protein	EC	KEGG_Pathways	KEGG_Pathways_1	KEGG_Pathways_2	KEGG_Pathways_3	Comparison Age8 - Age 18	Comparison Age8 - Age 24	Comparison Age18 - Age 24	Age 8	Age 8	Age 8	Age 8	Age 8	Age 8	Age 8	Age 8	Age 8	Age 8	Age 18	Age 18	Age 18	Age 18	Age 18	Age 18	Age 18	Age 18	Age 18	Age 18	Age 20	Age 20	Age 20	Age 20	Age 20	Age 20	Age 20	Age 20	Age 20	Age 20	Age 22	Age 22	Age 22	Age 22	Age 22	Age 22	Age 22	Age 22
K14067	malate-CoA ligase subunit beta [EC:6.2.1.9]	malate-CoA ligase subunit beta [EC:6.2.1.9]	malate-CoA ligase subunit beta	EC:6.2.1.9	Metabolism; Carbohydrate Metabolism; Glyoxylate and dicarboxylate metabolism|Metabolism; Energy Metabolism; Methane metabolism	Metabolism	Carbohydrate Metabolism	Glyoxylate and dicarboxylate metabolism	0	1	1	0	0	0	0	0	0	0	0	0	0	0	0	0	0	0	0	0	0	0	0	0	0	0	0	0	0	0	0	0	0	8.86264e-09	0	0	0	0	0	0	0
K04335	minor curlin subunit	minor curlin subunit	minor curlin subunit	0	Environmental Information Processing; Membrane Transport; Secretion system	Environmental Information Processing	Membrane Transport	Secretion system	0	1	1	0	0	0	0	0	0	0	0	0	0	0	0	0	0	0	0	0	0	0	0	0	0	0	0	0	0	0	0	0	0	0	0	0	0	0	0	0	0
K04338	curli production assembly/transport component CsgF	curli production assembly/transport component CsgF	curli production assembly/transport component CsgF	0	Environmental Information Processing; Membrane Transport; Secretion system	Environmental Information Processing	Membrane Transport	Secretion system	0	1	1	0	0	0	0	0	0	0	0	0	0	0	0	0	0	0	0	0	0	0	0	0	0	0	0	0	0	0	0	0	0	0	0	0	0	0	0	0	0
K13075	N-acyl homoserine lactone hydrolase [EC:3.1.1.81]	N-acyl homoserine lactone hydrolase [EC:3.1.1.81]	N-acyl homoserine lactone hydrolase	EC:3.1.1.81	Unclassified; Metabolism; Lipid metabolism	Unclassified	Metabolism	Lipid metabolism	0	1	1	0	0	0	0	0	0	0	0	0	0	0	0	0	0	0	0	0	0	0	0	0	0	0	0	0	0	0	0	0	0	8.86264e-09	0	0	0	0	0	0	0
K08692	malate-CoA ligase subunit alpha [EC:6.2.1.9]	malate-CoA ligase subunit alpha [EC:6.2.1.9]	malate-CoA ligase subunit alpha	EC:6.2.1.9	Metabolism; Carbohydrate Metabolism; Glyoxylate and dicarboxylate metabolism|Metabolism; Energy Metabolism; Methane metabolism	Metabolism	Carbohydrate Metabolism	Glyoxylate and dicarboxylate metabolism	0	1	1	0	0	0	0	0	0	0	0	0	0	0	0	0	0	0	0	0	0	0	0	0	0	0	0	0	0	0	0	0	0	8.86264e-09	0	0	0	0	0	0	0
K01044	carboxylesterase [EC:3.1.1.1]	carboxylesterase [EC:3.1.1.1]	carboxylesterase	EC:3.1.1.1	Metabolism; Biosynthesis of Other Secondary Metabolites; Tropane, piperidine and pyridine alkaloid biosynthesis|Metabolism; Xenobiotics Biodegradation and Metabolism; Drug metabolism - other enzymes	Metabolism	Biosynthesis of Other Secondary Metabolites	Tropane, piperidine and pyridine alkaloid biosynthesis	0	1	1	0	0	0	0	0	0	0	0	0	0	0	0	0	0	0	0	0	0	0	0	0	0	0	0	0	0	0	0	7.24216e-09	0	0	0	0	0	0	0	0	0
K11159	carotenoid cleavage dioxygenase	carotenoid cleavage dioxygenase	carotenoid cleavage dioxygenase	0	Unclassified; Metabolism; Biosynthesis and biodegradation of secondary metabolites	Unclassified	Metabolism	Biosynthesis and biodegradation of secondary metabolites	0	1	1	0	0	0	0	0	0	0	0	0	0	0	0	0	0	0	0	0	0	0	0	0	0	0	0	0	0	0	0	0	0	0	0	0	0	0	0	0	0
K00466	tryptophan 2-monooxygenase [EC:1.13.12.3]	tryptophan 2-monooxygenase [EC:1.13.12.3]	tryptophan 2-monooxygenase	EC:1.13.12.3	Metabolism; Amino Acid Metabolism; Tryptophan metabolism	Metabolism	Amino Acid Metabolism	Tryptophan metabolism	0	1	1	0	0	0	0	0	0	0	0	0	0	0	0	0	0	0	0	0	0	0	0	0	0	0	0	0	0	0	0	0	0	0	0	0	0	0	0	0	0
K08354	thiosulfate reductase cytochrome b subunit	thiosulfate reductase cytochrome b subunit	thiosulfate reductase cytochrome b subunit	0	Unclassified; Cellular Processes and Signaling; Electron transfer carriers	Unclassified	Cellular Processes and Signaling	Electron transfer carriers	0	1	1	0	0	0	0	0	0	0	0	0	0	0	0	0	0	0	0	0	0	0	0	1.18371e-08	0	0	0	0	0	0	2.33453e-08	0	3.84236e-08	0	0	0	0	0	0	0	0
K02442	membrane protein GlpM	membrane protein GlpM	membrane protein GlpM	0	Unclassified; Poorly Characterized; General function prediction only	Unclassified	Poorly Characterized	General function prediction only	0	1	1	0	0	0	0	0	0	0	0	0	0	0	0	0	0	0	0	0	0	0	0	0	0	0	0	0	0	0	0	0	0	0	0	0	0	0	0	0	0
K08299	carnitinyl-CoA dehydratase [EC:4.2.1.-]	carnitinyl-CoA dehydratase [EC:4.2.1.-]	carnitinyl-CoA dehydratase	EC:4.2.1.-	Unclassified; Metabolism; Others	Unclassified	Metabolism	Others	0	1	1	0	0	0	0	0	0	0	0	0	0	0	0	0	0	0	0	0	0	0	0	0	0	0	0	0	0	0	1.55635e-08	7.24216e-09	1.92118e-08	8.86264e-09	0	0	0	0	0	0	0
K10673	streptomycin 3"-kinase [EC:2.7.1.87]	streptomycin 3"-kinase [EC:2.7.1.87]	streptomycin 3"-kinase	EC:2.7.1.87	Unclassified; Metabolism; Others	Unclassified	Metabolism	Others	0	1	1	0	0	0	0	0	0	0	0	0	0	0	0	0	0	0	0	0	0	0	0	0	0	0	0	0	0	0	0	0	0	8.86264e-09	0	0	0	0	0	0	0
K03396	S-(hydroxymethyl)glutathione synthase [EC:4.4.1.22]	S-(hydroxymethyl)glutathione synthase [EC:4.4.1.22]	S-(hydroxymethyl)glutathione synthase	EC:4.4.1.22	Metabolism; Energy Metabolism; Methane metabolism	Metabolism	Energy Metabolism	Methane metabolism	0	1	1	0	0	0	0	0	0	0	0	0	0	0	0	0	0	0	0	0	0	0	0	0	0	0	0	0	0	0	0	0	0	8.86264e-09	0	0	0	0	0	0	0
[truncated: 145 more rows]
[truncated: 11 more columns]

## Sheet: Cat 9
This sheet contains the data of the statistically different PiCrust Data (normalized) belonging to Category 9
[truncated: 61 more rows]
[truncated: 11 more columns]

[truncated: 9 more sheets: Cat 12, KO_Information, Raw_Data_Manhattan, KO_Classification_Into_Pathways, Sectors Imp Correlations, SearchSpace, VitaminTyrptophan, MFC_Metadata_Correlation, AminoAcidPart]
