# Supplementary material for: Aging and sarcopenia associate with specific interactions between gut microbes, serum biomarkers and host physiology in rats
Source: Aging (Albany NY). 2017 Jul 17;9(7):1698–714. doi: 10.18632/aging.101262 (PMC5559170; doi:10.18632/aging.101262)
Supplement: Supplementary file 4 [file aging-09-1698-s004.xlsx]

## Sheet: Sheet1
Sample	age (months)	body weight (g)	lean mass	fat mass	Gastrocnemius muscle mass (mg)	Sciatic response amplitude (mV)	Triceps muscle mass (mg)	Radial response amplitude (mV)	Heart muscle mass (mg)	B12 total (pmol/L)	folate level (nmol/L)				Sample	age (months)	body weight (g)	lean mass (g/g) as %	fat mass (g/g) as %	Gastrocnemius muscle mass (mg/g)	Sciatic response amplitude (mV)	Triceps muscle mass (mg/g)	Radial response amplitude (mV)	Heart muscle mass (mg/g)	B12 total (pmol/L)	folate level (nmol/L)
1	8	540.78	395.03	53.18	2430	82.2	1968.5	49.2	1545	1195	173.5				1	8	540.78	73.0482	9.83394	4.49351	82.2	3.64011	49.2	2.85698	1195	173.5
2	8	482.8	359.38	50.745	2440.7	45.4	1982		1348	1060	162.5				2	8	482.8	74.4366	10.5106	5.0553	45.4	4.10522		2.79205	1060	162.5
3	8	558.47	404.12	74.08	2566.5	83.8	2085.5	77.4	1390	835	147.5				3	8	558.47	72.362	13.2648	4.59559	83.8	3.73431	77.4	2.48894	835	147.5
4	8	430.45	307.68	57.12	2553	60.3	2156.5	63.9	1506	885	130.5				4	8	430.45	71.4787	13.2698	5.931	60.3	5.00987	63.9	3.49866	885	130.5
5	8	526.76	382.05	67.76	2227	78.9	1801	75.5	1222	805	156.5				5	8	526.76	72.5283	12.8635	4.22773	78.9	3.41901	75.5	2.31984	805	156.5
6	8	595.61	440.03	83.67	2253	56.8	1915.5	64.3	1186	1300	189				6	8	595.61	73.8789	14.0478	3.78268	56.8	3.21603	64.3	1.99124	1300	189
7	8	483.57	369.09	47.75	2689	81.5	2138.5	70.2	1431	1175	206				7	8	483.57	76.3261	9.87448	5.56073	81.5	4.42232	70.2	2.95924	1175	206
8	8	579.74	398.95	100.35	2219.5	54.8	1617.5	84.4	1294	1090	212.5				8	8	579.74	68.8153	17.3095	3.82844	54.8	2.79004	84.4	2.23204	1090	212.5
9	8	464.06	343.62	47.19	2470.5	47.7	1785	47.6	1471	1070	136				9	8	464.06	74.0465	10.1689	5.32367	47.7	3.84649	47.6	3.16985	1070	136
10	8	524.97	370.66	74.73	2921	67.2	2415.5	91.4	1468	1325	176.5				10	8	524.97	70.6059	14.2351	5.56413	67.2	4.60122	91.4	2.79635	1325	176.5
11	18	528.02	362.16	82.79	1837	57.3	2182	59.3	1502	745	188.5				11	18	528.02	68.5883	15.6793	3.47903	57.3	4.13242	59.3	2.84459	745	188.5
12	18	545.37	402.565	56.56	2377	57.2	2357.5	57.9	1393	870	214.5				12	18	545.37	73.815	10.3709	4.35851	57.2	4.32275	57.9	2.55423	870	214.5
13	18	502.79	380.2	44.55	2005.5	57.7	1912	80.9	1378	990	150.5				13	18	502.79	75.6181	8.86056	3.98874	57.7	3.80278	80.9	2.74071	990	150.5
14	18	589.4	428.06	76.94	1731.5	57.9	2276.5	64	1405	980	141.5				14	18	589.4	72.6264	13.054	2.93773	57.9	3.8624	64	2.38378	980	141.5
15	18	601.95	412.06	95.74	2377	72.8	2236	94.3	1701	1125	151.5				15	18	601.95	68.4542	15.905	3.94883	72.8	3.71459	94.3	2.82582	1125	151.5
16	18	569.75	398.17	82.62	2183.5	80.1	1999.5	79.6	1444	920	186				16	18	569.75	69.885	14.5011	3.83238	80.1	3.50943	79.6	2.53444	920	186
17	18	510.01	356.23	77.31	2321.5	79.9	2004.5	75.7	1378	1095	190.5				17	18	510.01	69.8477	15.1585	4.55187	79.9	3.93032	75.7	2.70191	1095	190.5
18	18	579.1	403.64	89.16	2666.5	35.3	2326	61.1	2017	1265	159.5				18	18	579.1	69.7013	15.3963	4.60456	35.3	4.01658	61.1	3.48299	1265	159.5
19	18	594.85	427.28	72.85	2485.5	65.5	2304	70.2	1533	935	178.5				19	18	594.85	71.8299	12.2468	4.17836	65.5	3.87325	70.2	2.57712	935	178.5
20	18	533.78	382.99	64.44	1751	38.9	2172	66.6	1488	725	146.5				20	18	533.78	71.7505	12.0724	3.28038	38.9	4.06909	66.6	2.78767	725	146.5
21	20	524.38	344.385	108.925	2145.5	86.8	1930	72.8	1425	800	180				21	20	524.38	65.6747	20.7721	4.0915	86.8	3.68054	72.8	2.71749	800	180
22	20	572.84	413.085	73.17	2324.5	51.3	2410	47.6	1642	885	198.5				22	20	572.84	72.1118	12.7732	4.05785	51.3	4.20711	47.6	2.86642	885	198.5
23	20	551.78	341.46	139.16	1650	60.6	2214.5	59.3	1608	855	137.5				23	20	551.78	61.8834	25.2202	2.99032	60.6	4.01337	59.3	2.9142	855	137.5
24	20	511.77	364.24	74.13	1410.5	40.1	1989.5	74.4	1292	820	240.5				24	20	511.77	71.1726	14.485	2.75612	40.1	3.88749	74.4	2.52457	820	240.5
25	20	612.08	434.17	86.38	2029.5	55.1	2403.5	57.6	1442	755	165.5				25	20	612.08	70.9335	14.1125	3.31574	55.1	3.92677	57.6	2.3559	755	165.5
26	20	623.47	429.67	107.95	2369.5	75.3	2282	92.9	1573	735	186				26	20	623.47	68.9159	17.3144	3.8005	75.3	3.66016	92.9	2.52298	735	186
27	20	576.83	381.57	110.87	1638.75	31.2	2092.5	51.9	1230	705	179.5				27	20	576.83	66.1495	19.2206	2.84096	31.2	3.62759	51.9	2.13234	705	179.5
28	20	540.93	341.77	121.98	2057.5	34	2141.5	63.6	1752	680	175				28	20	540.93	63.1819	22.5501	3.80363	34	3.95892	63.6	3.23887	680	175
29	20	587	424.99	75.81	2559.5	43.1	2605	67.4	1737	695	206				29	20	587	72.4003	12.9148	4.36031	43.1	4.43782	67.4	2.95911	695	206
30	20	570.21	410.25	85.87	2097.5	52.5	2211	74	1805	635	217				30	20	570.21	71.9472	15.0594	3.67847	52.5	3.87752	74	3.1655	635	217
31	22	478.45	315.47	91.61	1367.45	27.8	1963.2	63.4	1398	695	170.5				31	22	478.45	65.9358	19.1472	2.85808	27.8	4.10325	63.4	2.92194	695	170.5
32	22	526.95	351.48	93.09	1496	32.5	2013.35	81.2	1330	850	178				32	22	526.95	66.7008	17.6658	2.83898	32.5	3.82076	81.2	2.52396	850	178
33	22	602.67	426.2	88.21	1697.5	26.1	2166.5	107	1494	810	226.5				33	22	602.67	70.7186	14.6365	2.81663	26.1	3.59484	107	2.47897	810	226.5
34	22	538.81	397.11	63.69	1334.5	29	2283.5	64.2	1820	750	212				34	22	538.81	73.7013	11.8205	2.47675	29	4.23804	64.2	3.37781	750	212
35	22	510.22	353.3	76.32	1963.5	52	2207	103	1446	810	189.5				35	22	510.22	69.2446	14.9583	3.84834	52	4.32559	103	2.83407	810	189.5
36	22	565.38	398.9	75.81	1881	37.3	2398	89.4	1713	1040	222.5				36	22	565.38	70.5543	13.4087	3.32697	37.3	4.2414	89.4	3.02982	1040	222.5
37	22	527.13	362.44	80.4	2074.5	46.1	2220.5	64.7	1846	1150	224.5				37	22	527.13	68.7572	15.2524	3.93546	46.1	4.21243	64.7	3.50198	1150	224.5
38	22	592.53	402.96	97.14	2061	45.2	2263.5	84.6	1550	925	243.5				38	22	592.53	68.0067	16.3941	3.4783	45.2	3.82006	84.6	2.6159	925	243.5
39	22	541.58	378.07	86.12	1388	29.7	2146	78.9	1477	830	214.5				39	22	541.58	69.8087	15.9016	2.56287	29.7	3.96248	78.9	2.72721	830	214.5
40	22	653.37	447.54	112.6	1598.5	23.4	2282.5	78.3	1719	740	202				40	22	653.37	68.4972	17.2337	2.44655	23.4	3.49343	78.3	2.63097	740	202
41	24	646.92	437.065	118.5	1397.5	33.8	2300.5	72.8	1924	870	163				41	24	646.92	67.5609	18.3176	2.16024	33.8	3.55608	72.8	2.97409	870	163
42	24	576.76	379.275	112.815	1024	12.6	2012.5	47.6	1475	775	132				42	24	576.76	65.7596	19.5601	1.77544	12.6	3.48932	47.6	2.55739	775	132
43	24	583.16	401.09	90.6	1227	38.5	2348	91.5	1624	780	277				43	24	583.16	68.7787	15.536	2.10405	38.5	4.02634	91.5	2.78483	780	277
44	24	651.32	417.53	139.69	1618	44.4	2419	71.8	1769	805	253				44	24	651.32	64.1052	21.4472	2.48419	44.4	3.714	71.8	2.71602	805	253
45	24	632.17	422.68	117.68	1553	29.5	2454.5	68.6	1709	780	180				45	24	632.17	66.8618	18.6152	2.45662	29.5	3.88266	68.6	2.70339	780	180
46	24	703.57	452.74	165.32	1019	9.5	2240.5	68.2	1587						46	24	703.57	64.349	23.4973	1.44833	9.5	3.18447	68.2	2.25564
47	24	559.75	377.88	104.77	1507.5	18.6	2223.5	36	1992	955	209				47	24	559.75	67.5087	18.7173	2.69317	18.6	3.97231	36	3.55873	955	209
49	24	634.23	430.67	108.01	1251	21	2147.5	63.7	2302	1535	208				49	24	634.23	67.9044	17.0301	1.97247	21	3.386	63.7	3.6296	1535	208
50	24	571.02	380.03	110.87	1686	14.9	2552	56.1	2039	800	222				50	24	571.02	66.5528	19.4161	2.95261	14.9	4.4692	56.1	3.5708	800	222
Data Selected For Analysis
Sample	age (months)	body weight (g)	lean mass (g/g) as %	fat mass (g/g) as %	Gastrocnemius muscle mass (mg/g)	Sciatic response amplitude (mV)	Triceps muscle mass (mg/g)	Radial response amplitude (mV)	Heart muscle mass (mg/g)	B12 total (pmol/L)	folate level (nmol/L)					8m-18m	8m-24m	18m-24m
1	8	540.78	73.0482	9.83394	4.49351	82.2	3.64011	49.2	2.85698	1195	173.5				body weight (g)	0.121225	0.00205677	0.0342794	P Values after 2 Sample Kolmogorov Test
2	8	482.8	74.4366	10.5106	5.0553	45.4	4.10522		2.79205	1060	162.5				lean mass (g/g) as %	0.121225	4.5706e-05	0.000182824
3	8	558.47	72.362	13.2648	4.59559	83.8	3.73431	77.4	2.48894	835	147.5				fat mass (g/g) as %	0.427355	0.00018282	0.000182824
4	8	430.45	71.4787	13.2698	5.931	60.3	5.00987	63.9	3.49866	885	130.5				Gastrocnemius muscle mass (mg/g)	0.0257481	4.5706e-05	9.14142e-05
5	8	526.76	72.5283	12.8635	4.22773	78.9	3.41901	75.5	2.31984	805	156.5				Sciatic response amplitude (mV)	0.520523	4.5706e-05	0.000319941
6	8	595.61	73.8789	14.0478	3.78268	56.8	3.21603	64.3	1.99124	1300	189				Triceps muscle mass (mg/g)	0.677585	0.89675	0.408245
7	8	483.57	76.3261	9.87448	5.56073	81.5	4.42232	70.2	2.95924	1175	206				Radial response amplitude (mV)	0.921323	0.439243	0.359934
8	8	579.74	68.8153	17.3095	3.82844	54.8	2.79004	84.4	2.23204	1090	212.5				Heart muscle mass (mg/g)	0.909722	0.236985	0.121989
9	8	464.06	74.0465	10.1689	5.32367	47.7	3.84649	47.6	3.16985	1070	136				B12 total (pmol/L)	0.241322	0.00226244	0.0918346
10	8	524.97	70.6059	14.2351	5.56413	67.2	4.60122	91.4	2.79635	1325	176.5				folate level (nmol/L)	0.850107	0.0675991	0.101102
11	18	528.02	68.5883	15.6793	3.47903	57.3	4.13242	59.3	2.84459	745	188.5
12	18	545.37	73.815	10.3709	4.35851	57.2	4.32275	57.9	2.55423	870	214.5
13	18	502.79	75.6181	8.86056	3.98874	57.7	3.80278	80.9	2.74071	990	150.5
14	18	589.4	72.6264	13.054	2.93773	57.9	3.8624	64	2.38378	980	141.5
15	18	601.95	68.4542	15.905	3.94883	72.8	3.71459	94.3	2.82582	1125	151.5
16	18	569.75	69.885	14.5011	3.83238	80.1	3.50943	79.6	2.53444	920	186
17	18	510.01	69.8477	15.1585	4.55187	79.9	3.93032	75.7	2.70191	1095	190.5
18	18	579.1	69.7013	15.3963	4.60456	35.3	4.01658	61.1	3.48299	1265	159.5
19	18	594.85	71.8299	12.2468	4.17836	65.5	3.87325	70.2	2.57712	935	178.5
20	18	533.78	71.7505	12.0724	3.28038	38.9	4.06909	66.6	2.78767	725	146.5				Notes:
41	24	646.92	67.5609	18.3176	2.16024	33.8	3.55608	72.8	2.97409	870	163				We did not consider sample 46
42	24	576.76	65.7596	19.5601	1.77544	12.6	3.48932	47.6	2.55739	775	132				For the missing value of Radial response amplitude for sample 2 and irregular measurement of B12 for sample 49, we used NaN
43	24	583.16	68.7787	15.536	2.10405	38.5	4.02634	91.5	2.78483	780	277
44	24	651.32	64.1052	21.4472	2.48419	44.4	3.714	71.8	2.71602	805	253
45	24	632.17	66.8618	18.6152	2.45662	29.5	3.88266	68.6	2.70339	780	180
47	24	559.75	67.5087	18.7173	2.69317	18.6	3.97231	36	3.55873	955	209
49	24	634.23	67.9044	17.0301	1.97247	21	3.386	63.7	3.6296	1535	208
50	24	571.02	66.5528	19.4161	2.95261	14.9	4.4692	56.1	3.5708	800	222
	M8	518.721	72.7526	12.5378	4.83628	65.86	3.87846	69.3222	2.71052	1074	169.05
	S8	52.8215	2.12319	2.43186	0.760854	14.8661	0.671883	14.7916	0.456743	183.966	27.8283
	M18	555.502	71.2116	13.3245	3.91604	60.26	3.92336	70.96	2.74333	965	170.75
	S18	36.1977	2.3394	2.41976	0.548576	15.1788	0.22825	11.6067	0.298912	167.099	24.1813
	M24	606.916	66.879	18.58	2.32485	26.6625	3.81199	63.5125	3.06186	912.5	205.5
	S24	37.6881	1.44299	1.75814	0.391767	11.6307	0.352388	17.0262	0.449647	258.94	47.0835

## Sheet: Sheet2
Hey,
Here are the corresponding ages for rat samples :
- ID 1 to 10 = 8 months old
- ID 11 to 20 = 18 months old
- ID 21 to 30 = 20 months old
- ID 31 to 40 = 22 months old
- ID 41 to 50 = 24 months old
Thanks!!
Alice

## Sheet: ReducedSetAnalysis
Sample	age (months)	body weight (g)	lean mass	fat mass	Gastrocnemius muscle mass (g)	Sciatic response amplitude (mV)	Triceps muscle mass (g)	Radial response amplitude (mV)	Heart muscle mass	B12 total (pmol/L)	folate level (nmol/L)											Comparison of averages			Overlaid with statistically significance
1	8	540.78	395.03	53.18	2430	82.2	1968.5	49.2	1545	1195	173.5					M8	STD8	M18	STD18	M24	STD24	8m-18m	8m-24m	18m-24m	8m-18m	8m-24m	18m-24m
2	8	482.8	359.38	50.745	2440.7	45.4	1982		1348	1060	162.5			1	body weight (g)	518.721	52.8215	555.502	36.1977	606.916	37.6881	1	1	1		1	1
3	8	558.47	404.12	74.08	2566.5	83.8	2085.5	77.4	1390	835	147.5			2	lean mass	72.7526	2.12319	71.2116	2.3394	66.879	1.44299	-1	-1	-1		-1	-1
4	8	430.45	307.68	57.12	2553	60.3	2156.5	63.9	1506	885	130.5			3	fat mass	12.5378	2.43186	13.3245	2.41976	18.58	1.75814	1	1	1		1	1
5	8	526.76	382.05	67.76	2227	78.9	1801	75.5	1222	805	156.5			4	Gastrocnemius muscle mass (g)	4.83628	0.760854	3.91604	0.548576	2.32485	0.391767	-1	-1	-1	-1	-1	-1
6	8	595.61	440.03	83.67	2253	56.8	1915.5	64.3	1186	1300	189			5	Sciatic response amplitude (mV)	65.86	14.8661	60.26	15.1788	26.6625	11.6307	-1	-1	-1		-1	-1
7	8	483.57	369.09	47.75	2689	81.5	2138.5	70.2	1431	1175	206			6	Triceps muscle mass (g)	3.87846	0.671883	3.92336	0.22825	3.81199	0.352388	1	-1	-1
8	8	579.74	398.95	100.35	2219.5	54.8	1617.5	84.4	1294	1090	212.5			7	Radial response amplitude (mV)	69.3222	14.7916	70.96	11.6067	63.5125	17.0262	1	-1	-1
9	8	464.06	343.62	47.19	2470.5	47.7	1785	47.6	1471	1070	136			8	Heart muscle mass	2.71052	0.456743	2.74333	0.298912	3.06186	0.449647	1	1	1
10	8	524.97	370.66	74.73	2921	67.2	2415.5	91.4	1468	1325	176.5			9	B12 total (pmol/L)	1074	183.966	965	167.099	912.5	258.94	-1	-1	-1		-1
11	18	528.02	362.16	82.79	1837	57.3	2182	59.3	1502	745	188.5			10	folate level (nmol/L)	169.05	27.8283	170.75	24.1813	205.5	47.0835	1	1	1
12	18	545.37	402.565	56.56	2377	57.2	2357.5	57.9	1393	870	214.5
13	18	502.79	380.2	44.55	2005.5	57.7	1912	80.9	1378	990	150.5
14	18	589.4	428.06	76.94	1731.5	57.9	2276.5	64	1405	980	141.5					8m-18m	8m-24m	18m-24m
15	18	601.95	412.06	95.74	2377	72.8	2236	94.3	1701	1125	151.5				body weight (g)	0.121225	0.00205677	0.0342794	P Values after 2 Sample Kolmogorov Test
16	18	569.75	398.17	82.62	2183.5	80.1	1999.5	79.6	1444	920	186				lean mass (g/g) as %	0.121225	4.5706e-05	0.000182824
17	18	510.01	356.23	77.31	2321.5	79.9	2004.5	75.7	1378	1095	190.5				fat mass (g/g) as %	0.427355	0.00018282	0.000182824
18	18	579.1	403.64	89.16	2666.5	35.3	2326	61.1	2017	1265	159.5				Gastrocnemius muscle mass (mg/g)	0.0257481	4.5706e-05	9.14142e-05
19	18	594.85	427.28	72.85	2485.5	65.5	2304	70.2	1533	935	178.5				Sciatic response amplitude (mV)	0.520523	4.5706e-05	0.000319941
20	18	533.78	382.99	64.44	1751	38.9	2172	66.6	1488	725	146.5				Triceps muscle mass (mg/g)	0.677585	0.89675	0.408245
21	24	646.92	437.065	118.5	1397.5	33.8	2300.5	72.8	1924	870	163				Radial response amplitude (mV)	0.921323	0.439243	0.359934
22	24	576.76	379.275	112.815	1024	12.6	2012.5	47.6	1475	775	132				Heart muscle mass (mg/g)	0.909722	0.236985	0.121989
23	24	583.16	401.09	90.6	1227	38.5	2348	91.5	1624	780	277				B12 total (pmol/L)	0.241322	0.00226244	0.0918346
24	24	651.32	417.53	139.69	1618	44.4	2419	71.8	1769	805	253				folate level (nmol/L)	0.850107	0.0675991	0.101102
25	24	632.17	422.68	117.68	1553	29.5	2454.5	68.6	1709	780	180
26	24	559.75	377.88	104.77	1507.5	18.6	2223.5	36	1992	955	209
27	24	634.23	430.67	108.01	1251	21	2147.5	63.7	2302	1535	208
28	24	571.02	380.03	110.87	1686	14.9	2552	56.1	2039	800	222
	M8	518.721	377.061	65.6575	2477.02	65.86	1986.55	69.3222	1386.1	1074	169.05
	STD8	52.8215	36.3216	17.6332	220.71	14.8661	226.668	14.7916	121.324	183.966	27.8283
	M18	555.502	395.335	74.296	2173.6	60.26	2177	70.96	1523.9	965	170.75
	STD18	36.1977	24.7469	15.4089	326.692	15.1788	154.858	11.6067	199.051	167.099	24.1813
	M24	601.201	401.308	112.062	1409.5	25.6429	2308.14	62.1857	1844.29	918.571	211.571
	STD24	37.6881	24.4596	13.9557	225.922	11.6307	175.333	17.0262	262.859	258.94	47.0835
