# Supplementary material for: Aging and sarcopenia associate with specific interactions between gut microbes, serum biomarkers and host physiology in rats
Source: Aging (Albany NY). 2017 Jul 17;9(7):1698–714. doi: 10.18632/aging.101262 (PMC5559170; doi:10.18632/aging.101262)
Supplement: Supplementary file 5 [file aging-09-1698-s005.xlsx]

## Sheet: ANOVA_20131126
		ANOVA				Pair-Wise t-tests						t-test significance
						Pr > t			log2(mean group1/mean group 2)			annotation at p<0.00225
SeqId	Full_Name	Rank	F Value	Pr > F	q	8m-18m	8m-24m	18m-24m	8m/18m	8m/24m	18m/24m	pair1	pair2	pair3	SomaId	Target	UniProt	EntrezGeneID	EntrezGeneSymbol
3212-30_3	Neutral ceramidase	1	46.49	8.3e-09	7.04e-06	0.00121	7.56e-09	5.89e-05	-0.179	-0.435	-0.256	8m-18m	8m-24m	18m-24m	SL010375	ASAH2	Q9NR71	56624	ASAH2
5236-2_3	NR1D1/nuclear receptor subfamily 1, group D, member 1	2	38.4	4.68e-08	1.33e-05	0.000211	4.83e-08	0.00111	-0.244	-0.472	-0.228	8m-18m	8m-24m	18m-24m	SL007145	NR1D1	P20393	9572	NR1D1
3726-62_4	Parathyroid hormone	3	37.55	5.7e-08	1.33e-05	0.000671	1.27e-08	0.000772	-0.286	-0.555	-0.269	8m-18m	8m-24m	18m-24m	SL003970	PTH	P01270	5741	PTH
3083-71_1	X-linked ectodysplasin-A2 receptor	4	37.13	6.29e-08	1.33e-05	0.000291	2.75e-08	0.0013	-0.458	-0.924	-0.466	8m-18m	8m-24m	18m-24m	SL005233	XEDAR	Q9HAV5	60401	EDA2R
2765-4_3	Growth-differentiation factor 11	5	28.72	5.58e-07	9.47e-05	0.000854	3.9e-06	0.000954	0.35	0.692	0.342	8m-18m	8m-24m	18m-24m	SL004345	GDF-11	O95390	10220	GDF11
4322-28_3	Amnionless	6	27.97	6.94e-07	9.81e-05	0.00276	1.7e-07	0.00174	-0.191	-0.407	-0.216	8m-24m	18m-24m		SL013489	AMNLS	Q9BXJ7	81693	AMN
3341-33_4	c-abl oncogene 1, non-receptor tyrosine kinase	7	27.34	8.34e-07	0.000101	0.000166	1.46e-06	0.00724	-0.399	-0.748	-0.349	8m-18m	8m-24m		SL006892	ABL1	P00519	25	ABL1
4703-87_2	Tumor necrosis factor ligand superfamily member 1/TNF-beta/Lymphotoxin-alpha	8	26.31	1.14e-06	0.000121	0.000202	1.6e-06	0.0183	-0.446	-0.718	-0.272	8m-18m	8m-24m		SL000597	TNF-b	P01374	4049	LTA
2719-3_4	Granulocyte colony-stimulating factor receptor	9	23.68	2.6e-06	0.000245	0.000149	6.23e-06	0.0155	-0.271	-0.48	-0.209	8m-18m	8m-24m		SL004591	G-CSF-R	Q99062	1441	CSF3R
2851-63_3	Complement C5a	10	21.33	5.76e-06	0.000457	0.00279	2.91e-07	0.0161	-0.141	-0.247	-0.106	8m-24m			SL000320	C5a	P01031	727	C5
3196-6_2	Hyaluronan and proteoglycan link protein 1	11	21.25	5.93e-06	0.000457	0.000166	0.000197	0.597	0.427	0.452	0.025	8m-18m	8m-24m		SL008023	HPLN1	P10915	1404	HAPLN1
4336-2_1	Serum amyloid A	12	19.76	1.01e-05	0.000716	0.000177	1.91e-05	0.0301	-0.284	-0.497	-0.213	8m-18m	8m-24m		SL000572	SAA	P0DJI8	6288	SAA1
5076-53_2	EPH receptor A10	13	18.82	1.44e-05	0.00094	0.00476	1.61e-05	0.00756	0.148	0.269	0.121	8m-24m			SL014294	EPHAA	Q5JZY3	284656	EPHA10
5085-18_3	Interleukin-20 receptor subunit alpha	14	18.61	1.56e-05	0.000944	0.00116	3.19e-05	0.0176	-0.173	-0.312	-0.139	8m-18m	8m-24m		SL005181	IL-20 Ra	Q9UHF4	53832	IL20RA
3057-55_1	WNT1-inducible-signaling pathway protein 1	15	17.42	2.48e-05	0.0014	0.00303	6.01e-05	0.0162	0.337	0.534	0.197	8m-24m			SL004689	WISP-1	O95388	8840	WISP1
3292-75_1	CD48	16	16.61	3.44e-05	0.00183	0.000111	0.000199	0.158	0.077	0.105	0.028	8m-18m	8m-24m		SL010450	CD48	P09326	962	CD48
5308-89_2	Neutrophil elastase	17	15.15	6.35e-05	0.00317	0.00439	1.63e-05	0.0585	0.121	0.191	0.069	8m-24m			SL000401	Elastase	P08246	1991	ELANE
2974-61_2	Contactin-1	18	14.85	7.23e-05	0.00341	0.00685	0.00012	0.0146	0.217	0.413	0.196	8m-24m			SL004855	contactin-1	Q12860	1272	CNTN1
4252-33_4	Nucleoside diphosphate kinase A	19	13.49	0.000133	0.00593	0.0142	0.000407	0.00773	-0.231	-0.532	-0.302	8m-24m			SL003687	Nucleoside diphosphate kinase A	P15531	4830	NME1
3376-49_2	Interleukin-17 receptor D	20	12.07	0.00026	0.011	0.0762	0.000175	0.00499	-0.052	-0.131	-0.079	8m-24m			SL010613	IL-17 RD	Q8NFM7	54756	IL17RD
2687-2_1	Melanoma Inhibitory Activity	21	11.88	0.000285	0.0115	0.0133	0.000157	0.0403	0.368	0.657	0.289	8m-24m			SL001947	MIA	Q16674	8190	MIA
4695-49_2	alpha-S1-casein	22	10.76	0.000502	0.0187	0.00342	0.000333	0.117	-0.215	-0.351	-0.137	8m-24m			SL001868	CASA	P47710	1446	CSN1S1
3823-9_1	Megakaryocyte-associated tyrosine-protein kinase	23	10.74	0.000508	0.0187	0.00249	0.000533	0.197	0.135	0.193	0.058	8m-24m			SL010505	MATK	P42679	4145	MATK
4995-16_1	15-hydroxyprostaglandin dehydrogenase [NAD+]	24	10.57	0.000555	0.0196	0.000362	0.00209	0.182	-0.197	-0.287	-0.09	8m-18m	8m-24m		SL003930	HPG-	P15428	3248	HPGD
4278-14_3	Protein disulfide-isomerase	25	10.49	0.00058	0.0197	0.0678	0.000249	0.0134	0.135	0.309	0.174	8m-24m			SL004901	Protein disulfide-isomerase	P07237	5034	P4HB
4232-19_2	Insulin-like growth factor I receptor	26	10.2	0.000673	0.022	0.427	0.00224	0.000829	-0.072	0.304	0.376	8m-24m	18m-24m		SL003304	IGF-I sR	P08069	3480	IGF1R
5227-60_3	Pyruvate dehydrogenase kinase, isozyme 1	27	10.09	0.000714	0.0224	0.0726	0.000112	0.0245	0.05	0.124	0.073	8m-24m			SL006921	PDK1	Q15118	5163	PDK1
5073-30_2	Death receptor 3 (DR3)/TNFRSF25	28	9.96	0.000768	0.0225	0.00059	0.00268	0.32	1.003	1.311	0.308	8m-18m			SL004791	DR3	Q93038	8718	TNFRSF25
4964-67_1	Endoplasmic reticulum aminopeptidase 1	29	9.95	0.00077	0.0225	0.0611	0.00102	0.0115	-0.116	-0.275	-0.159	8m-24m			SL007729	ARTS1	Q9NZ08	51752	ERAP1
3804-66_2	Dentin matrix protein 1	30	9.51	0.000976	0.0276	0.0555	6.73e-05	0.0447	-0.123	-0.27	-0.147	8m-24m			SL007403	DMP1	Q13316	1758	DMP1
2968-61_1	Tumor necrosis factor ligand superfamily member 15	31	9.09	0.00123	0.0338	0.719	0.00423	0.00185	-0.009	-0.113	-0.103	18m-24m			SL004686	TNFSF15	O95150	9966	TNFSF15
3798-71_1	Carbonic anhydrase IX	32	8.68	0.00156	0.0412	0.253	0.000532	0.00464	0.068	0.211	0.143	8m-24m			SL005508	Carbonic anhydrase 9	Q16790	768	CA9
4129-72_1	Complement factor B	33	8.44	0.00179	0.0459	0.0384	0.00198	0.0367	0.134	0.232	0.097	8m-24m			SL000414	Factor B	P00751	629	CFB
5107-7_2	Notch 1	34	8.26	0.00198	0.0493	0.0861	0.00123	0.02	0.171	0.362	0.191	8m-24m			SL005703	Notch 1	P46531	4851	NOTCH1
2788-55_1	Matrix metalloproteinase 3/Stromelysin 1	35	8.21	0.00203	0.0493	0.128	0.000904	0.0159	-0.062	-0.148	-0.086	8m-24m			SL000524	MMP-3	P08254	4314	MMP3
4540-11_2	Chromobox protein homolog 5	36	7.96	0.00236	0.0556	0.0199	0.000924	0.183	-0.091	-0.137	-0.046	8m-24m			SL009768	CBX5	P45973	23468	CBX5
5384-67_3	BRF1	37	7.83	0.00255	0.0584	0.012	0.00283	0.213	-0.079	-0.113	-0.034	none			SL016130	BRF-1	Q92994	2972	BRF1
4915-64_2	Hemoglobin	38	7.75	0.00267	0.0596	0.0021	0.0463	0.14	2.015	1.473	-0.542	8m-18m			SL000836	Hemoglobin	P69905 P68871	3039 3043	HBA1 HBB
4986-59_1	Focal adhesion kinase 1	39	7.48	0.00314	0.0674	0.0648	0.00458	0.018	0.115	0.215	0.1	none			SL012248	FAK1	Q05397	5747	PTK2
4280-47_2	Proteasome subunit alpha2	40	7.46	0.00318	0.0674	0.0701	0.00136	0.0552	-0.077	-0.173	-0.096	8m-24m			SL008865	PSA2	P25787	5683	PSMA2
4867-15_2	Vascular endothelial growth factor A, secreted splice variant	41	7.39	0.00333	0.0689	0.467	0.0192	0.002	0.02	-0.089	-0.109	18m-24m			SL003310	VEGF121	P15692	7422	VEGFA
2917-3_2	Osteoprotegerin ligand/TRANCE	42	7.33	0.00344	0.0695	0.0855	1.02e-05	0.106	-0.141	-0.276	-0.135	8m-24m			SL002541	sRANKL	O14788	8600	TNFSF11
2848-2_2	Wnt inhibitory factor 1	43	7.25	0.00362	0.0713	0.0789	0.000551	0.0723	0.092	0.18	0.088	8m-24m			SL004652	WIF-1	Q9Y5W5	11197	WIF1
3535-84_1	Dickkopf-related protein 1	44	6.99	0.00425	0.0809	0.0177	0.000326	0.537	0.346	0.423	0.077	8m-24m			SL004367	DKK1	O94907	22943	DKK1
3729-16_2	Somatostatin-28	45	6.96	0.00433	0.0809	0.00258	0.00676	0.583	-0.074	-0.089	-0.015	none			SL011510	Somatostatin-28	P61278	6750	SST
5071-3_3	Desmoglein-2	46	6.94	0.00439	0.0809	0.00362	0.01	0.427	1.21	1.535	0.326	none			SL004857	Desmoglein-2	Q14126	1829	DSG2
2860-19_2	Karyopherin alpha 2 (RAG cohort 1, importin alpha1)	47	6.85	0.00464	0.0838	0.00212	0.00978	0.831	-0.204	-0.218	-0.014	8m-18m			SL004718	Karyopherin-a2	P52292	3838	KPNA2
2741-22_2	Siglec-6	48	6.74	0.00496	0.0865	0.292	0.000661	0.0357	-0.107	-0.382	-0.275	8m-24m			SL005217	Siglec-6	O43699	946	SIGLEC6
3325-2_2	Matrilin-2	49	6.7	0.0051	0.0865	0.193	0.0341	0.00621	-0.137	0.315	0.453	none			SL010465	MATN2	O00339	4147	MATN2
3311-27_1	Immunoglobulin G Fc region receptor III-B, low affinity	50	6.69	0.00512	0.0865	0.0188	0.00404	0.562	0.143	0.166	0.023	none			SL008609	FCG3B	O75015	2215	FCGR3B
4829-43_6	14-3-3sigma/Stratifin	51	6.64	0.00528	0.0865	0.779	0.00376	0.00259	0.046	0.478	0.432	none			SL001737	STRATIFIN	P31947	2810	SFN
5131-15_3	TROY/TNFRSF19	52	6.6	0.00544	0.0865	0.0606	0.0095	0.0366	0.056	0.114	0.059	none			SL004863	TAJ	Q9NS68	55504	TNFRSF19
4815-25_3	Thioredoxin domain-containing protein 12	53	6.59	0.00545	0.0865	0.000637	0.0138	0.695	-0.295	-0.255	0.04	8m-18m			SL016128	TXD12	O95881	51060	TXNDC12
4965-27_1	ATP synthase beta-subunit, mitochondrial	54	6.58	0.00551	0.0865	0.000567	0.0125	0.0775	-0.155	-0.364	-0.209	8m-18m			SL005675	ATP synthase beta chain	P06576	506	ATP5B
3340-53_1	Thrombospondin-4	55	6.51	0.00575	0.0887	0.156	0.00159	0.0495	0.157	0.405	0.248	8m-24m			SL007207	TSP4	P35443	7060	THBS4
3294-55_2	Cryptic protein	56	6.42	0.00609	0.0916	0.00818	0.0161	0.968	-0.209	-0.211	-0.002	none			SL010451	CFC1	P0CG37	55997	CFC1
2954-56_2	Matrix metalloproteinase 8/Neutrophil collagenase	57	6.4	0.00616	0.0916	0.0114	0.00334	0.57	0.201	0.243	0.042	none			SL000526	MMP-8	P22894	4317	MMP8
4428-1_2	Carbohydrate sulfotransferase 2	58	6.25	0.00678	0.0991	0.00152	0.00882	0.872	-0.444	-0.471	-0.027	8m-18m			SL013988	CHST2	Q9Y4C5	9435	CHST2
3805-16_2	Endocan	59	6.07	0.00764	0.11	0.568	0.0124	0.00362	0.021	-0.088	-0.109	none			SL010458	Endocan	Q9NQ30	11082	ESM1
5122-92_2	Semaphorin-6A	60	5.93	0.00835	0.118	0.266	0.0297	0.00648	-0.132	0.264	0.396	none			SL005214	Semaphorin-6A	Q9H2E6	57556	SEMA6A
3534-14_2	CD40 ligand	61	5.74	0.00948	0.132	0.00737	0.00757	0.71	0.187	0.163	-0.024	none			SL003862	CD40 ligand, soluble	P29965	959	CD40LG
4910-21_1	Phospholipase A2, Group IB	62	5.65	0.0101	0.136	0.023	0.0131	0.101	0.071	0.158	0.087	none			SL004064	GIB	P04054	5319	PLA2G1B
3220-40_2	Proto-oncogene tyrosine-protein kinase receptor Ret	63	5.64	0.0101	0.136	0.709	0.00169	0.0221	-0.016	-0.126	-0.111	8m-24m			SL010378	RET	P07949	5979	RET
2690-51_2	Neuregulin-1	64	5.6	0.0104	0.138	0.177	0.00259	0.0658	0.042	0.101	0.059	none			SL004297	NEUREGULIN-1	Q02297	3084	NRG1
2774-10_3	Interleukin-16	65	5.52	0.011	0.144	0.115	0.123	0.00564	-0.166	0.157	0.323	none			SL000474	IL-16	Q14005	3603	IL16
4545-53_3	DnaJ homolog	66	5.45	0.0115	0.148	0.0037	0.0227	0.988	-0.36	-0.358	0.002	none			SL006197	DnaJ homolog	Q96DA6	131118	DNAJC19
4569-52_2	Sortilin-related VPS10 domain containing receptor 2	67	5.41	0.0119	0.151	0.134	0.00957	0.0545	-0.079	-0.173	-0.094	none			SL014091	SORC2	Q96PQ0	57537	SORCS2
4883-56_2	Insulin	68	5.37	0.0122	0.151	0.261	0.0663	0.00287	-0.2	0.307	0.507	none			SL000021	Insulin	P01308	3630	INS
3037-62_1	Interleukin-1beta	69	5.36	0.0123	0.151	0.129	0.00129	0.124	0.108	0.215	0.107	8m-24m			SL001795	IL-1b	P01584	3553	IL1B
3043-49_2	Osteonectin	70	5.34	0.0124	0.151	0.667	0.00557	0.0255	0.05	0.371	0.321	none			SL000532	ON	P09486	6678	SPARC
3320-49_2	Insulin-like growth factor-binding protein 7	71	5.21	0.0136	0.162	0.0502	0.000994	0.337	-0.133	-0.2	-0.067	8m-24m			SL005087	IGFBP-7	Q16270	3490	IGFBP7
2806-49_2	Activin Serine-threonine-protein kinase receptor type-1B	72	5.11	0.0146	0.172	0.0225	0.0151	0.793	0.089	0.096	0.008	none			SL004128	Activin RIB	P36896	91	ACVR1B
3580-25_5	alpha1-Antitrypsin	73	4.89	0.017	0.197	0.0364	0.00792	0.348	0.138	0.202	0.063	none			SL000249	a1-Antitrypsin	P01009	5265	SERPINA1
4459-68_2	Proprotein Convertase 7	74	4.87	0.0172	0.197	0.263	0.068	0.0119	0.021	-0.04	-0.061	none			SL014069	PCSK7	Q16549	9159	PCSK7
3809-1_2	Fibroblast growth factor receptor 3	75	4.78	0.0184	0.203	0.00102	0.0226	0.207	-0.266	-0.514	-0.247	8m-18m			SL004063	FGFR-3	P22607	2261	FGFR3
3654-27_1	Bone morphogenetic protein-binding endothelial regulator protein	76	4.77	0.0186	0.203	0.875	0.00794	0.0151	-0.01	0.146	0.155	none			SL007531	BMPER	Q8N8U9	168667	BMPER
2658-27_1	Neurotrophic tyrosine kinase receptor type 3	77	4.76	0.0186	0.203	0.71	0.0211	0.00447	0.021	0.146	0.126	none			SL004639	TrkC	Q16288	4916	NTRK3
4880-21_1	Growth-differentiation factor 2	78	4.76	0.0186	0.203	0.0185	0.0117	0.265	-0.156	-0.269	-0.113	none			SL007756	GDF2	Q9UK05	2658	GDF2
3896-5_2	Phosphoglycerate mutase 1	79	4.66	0.02	0.214	0.00694	0.067	0.392	-1.73	-1.217	0.513	none			SL004820	Phosphoglycerate mutase 1	P18669	5223	PGAM1
2516-57_3	6Ckine/CCL21	80	4.56	0.0214	0.227	0.0328	0.00666	0.723	-0.421	-0.483	-0.062	none			SL003193	6Ckine	O00585	6366	CCL21
2823-7_1	COMM domain containing 7	81	4.44	0.0233	0.244	0.000552	0.0676	0.751	-0.127	-0.111	0.016	8m-18m			SL004704	COMMD7	Q86VX2	149951	COMMD7
4911-49_2	Glutathione S-transferase Pi 1	82	4.41	0.0239	0.247	0.863	0.0347	0.0242	0.007	0.128	0.121	none			SL003643	Glutathione S-transferase Pi	P09211	2950	GSTP1
5494-52_3	Small nuclear ribonucleoprotein F	83	4.37	0.0247	0.252	0.0108	0.029	0.856	-0.18	-0.168	0.013	none			SL009790	RUXF	P62306	6636	SNRPF
3835-11_2	Toll-like receptor 2	84	4.34	0.0252	0.255	0.00254	0.0751	0.623	-0.154	-0.125	0.029	none			SL004492	TLR2	O60603	7097	TLR2
4314-12_2	dCTP pyrophosphatase 1	85	4.28	0.0263	0.263	0.913	0.0661	0.0318	-0.012	0.516	0.528	none			SL011809	XTP3A	Q9H773	79077	DCTPP1
4834-61_2	Ephrin type-A receptor 2	86	4.22	0.0275	0.267	0.833	0.00122	0.0396	0.01	0.108	0.098	8m-24m			SL002654	Epithelial cell kinase	P29317	1969	EPHA2
2665-26_2	B-cell maturation protein	87	4.21	0.0277	0.267	0.0241	0.0688	0.435	0.08	0.062	-0.018	none			SL004672	BCMA	Q02223	608	TNFRSF17
3797-1_1	Cadherin 2, type 1, N-cadherin (neuronal)	88	4.21	0.0277	0.267	0.617	0.00836	0.0389	0.013	0.07	0.056	none			SL000638	Cadherin-2	P19022	1000	CDH2
4342-10_2	Intercellular adhesion molecule 1	89	4.19	0.0282	0.268	0.0924	0.00575	0.254	0.078	0.139	0.061	none			SL002922	sICAM-1	P05362	3383	ICAM1
2597-8_3	Vascular endothelial growth factor A	90	4.15	0.0289	0.272	0.986	0.0511	0.0119	-0.001	-0.1	-0.1	none			SL000002	VEGF	P15692	7422	VEGFA
2682-68_1	Hsp60	91	4.13	0.0293	0.272	0.0174	0.0257	0.854	-0.94	-1.014	-0.074	none			SL000450	HSP 60	P10809	3329	HSPD1
4234-8_2	Interleukin-1 receptor 4	92	4.12	0.0295	0.272	0.122	0.0134	0.182	0.13	0.233	0.104	none			SL004146	IL-1 R4	Q01638	9173	IL1RL1
3234-23_2	Coiled-coil domain-containing protein 80	93	4.05	0.031	0.282	0.0313	0.858	0.0342	-0.255	0.019	0.275	none			SL010390	URB	Q76M96	151887	CCDC80
5062-60_3	DNAX accessory molecule 1/CD226	94	4.03	0.0316	0.282	0.218	0.0249	0.091	-0.056	-0.155	-0.099	none			SL011100	CD226	Q15762	10666	CD226
3492-58_1	Erythropoietin	95	4.02	0.0318	0.282	0.026	0.0315	0.167	-0.109	-0.254	-0.145	none			SL000408	Epo	P01588	2056	EPO
4984-83_1	Esterase D	96	4.02	0.0319	0.282	0.0432	0.00563	0.819	0.476	0.524	0.049	none			SL006378	Esterase D	P10768	2098	ESD
5059-8_3	Anti-Mullerian hormone receptor, type II	97	3.93	0.0341	0.287	0.0146	0.0362	0.483	0.733	1	0.267	none			SL007464	AMHR2	Q16671	269	AMHR2
4553-65_3	Hepatoma-derived growth factor-related protein 2	98	3.92	0.0342	0.287	0.022	0.0298	0.938	0.099	0.096	-0.003	none			SL014009	HDGR2	Q7Z4V5	84717	HDGFRP2
2645-54_1	Protein kinase C zeta	99	3.9	0.0348	0.287	0.00633	0.0558	0.957	-0.166	-0.17	-0.004	none			SL000557	PKC-Z	Q05513	5590	PRKCZ
2635-61_2	Layilin	100	3.9	0.0348	0.287	0.0952	0.00719	0.301	-0.064	-0.108	-0.044	none			SL004646	Layilin	Q6UX15	143903	LAYN
5092-51_3	Jagged-1	101	3.89	0.035	0.287	0.0202	0.228	0.142	-0.296	-0.116	0.179	none			SL007328	JAG1	P78504	182	JAG1
3343-1_4	Aminoacylase-1	102	3.89	0.035	0.287	0.000994	0.142	0.457	-0.547	-0.381	0.166	8m-18m			SL005574	Aminoacylase-1	Q03154	95	ACY1
5011-11_1	Visfatin	103	3.89	0.0351	0.287	0.0284	0.0187	0.582	-0.088	-0.068	0.019	none			SL003685	PBEF	P43490	10135	NAMPT
4267-81_3	Pescadillo	104	3.89	0.0352	0.287	0.0638	0.7	0.0233	0.075	-0.013	-0.088	none			SL011772	PESC	O00541	23481	PES1
2743-5_2	Sonic Hedgehog	105	3.82	0.0369	0.296	0.277	0.174	0.00629	-0.121	0.15	0.272	none			SL005220	Sonic Hedgehog	Q15465	6469	SHH
2715-25_2	Erythropoietin receptor	106	3.82	0.037	0.296	0.299	0.154	0.0103	0.047	-0.076	-0.123	none			SL005159	EPO-R	P19235	2057	EPOR
3317-33_1	High temperature requirement serine peptidase A2	107	3.78	0.038	0.301	0.0069	0.131	0.413	-0.772	-0.53	0.242	none			SL004860	HTRA2	O43464	27429	HTRA2
3647-49_4	Toll-like receptor 4	108	3.77	0.0383	0.301	0.07	0.0134	0.402	0.085	0.124	0.04	none			SL018625	TLR4:MD-2 complex	O00206 Q9Y6Y9	7099 23643	TLR4 LY96
3811-1_2	Ficolin-3	109	3.74	0.0393	0.305	0.0541	0.0842	0.91	0.569	0.578	0.009	none			SL002086	Ficolin-3	O75636	8547	FCN3
2775-54_2	Interleukin-17F	110	3.73	0.0395	0.305	0.853	0.00314	0.0475	-0.015	-0.185	-0.17	none			SL004352	IL-17F	Q96PD4	112744	IL17F
3067-67_1	Growth-differentiation factor 9	111	3.69	0.0407	0.309	0.028	0.0669	0.391	-0.186	-0.126	0.06	none			SL005234	GDF-9	O60383	2661	GDF9
3404-51_2	Tryptase gamma	112	3.69	0.0409	0.309	0.0202	0.0341	0.751	-0.129	-0.112	0.018	none			SL010619	TPSG1	Q9NRR2	25823	TPSG1
4548-4_2	Fucosyltransferase 3	113	3.63	0.0427	0.312	0.637	0.0185	0.0508	-0.018	-0.095	-0.077	none			SL005575	Fucosyltransferase 3	P21217	2525	FUT3
5490-53_3	Testican-1/SPOCK1	114	3.62	0.0429	0.312	0.0647	0.0435	0.331	-0.104	-0.152	-0.047	none			SL010384	Testican-1	Q08629	6695	SPOCK1
5078-82_3	EPH receptor B6	115	3.62	0.043	0.312	0.633	0.0175	0.0736	0.046	0.273	0.227	none			SL008414	EphB6	O15197	2051	EPHB6
4450-26_2	Heterogeneous nuclear ribonucleoprotein AB	116	3.62	0.0431	0.312	0.00907	0.072	0.739	-0.73	-0.626	0.104	none			SL009791	hnRNP A/B	Q99729	3182	HNRNPAB
3477-63_2	Neurotrophic tyrosine kinase receptor type 1	117	3.59	0.044	0.312	0.919	0.0341	0.0316	0.006	-0.143	-0.149	none			SL005225	TrkA	P04629	4914	NTRK1
3061-61_2	Cathepsin B	118	3.59	0.044	0.312	0.0323	0.0385	0.842	-0.312	-0.287	0.025	none			SL000343	Cathepsin B	P07858	1508	CTSB
3431-54_2	Ephrin type-A receptor 1	119	3.59	0.0441	0.312	0.103	0.0245	0.283	-0.089	-0.142	-0.054	none			SL004137	EphA1	P21709	2041	EPHA1
5103-30_3	CD200 receptor 1	120	3.59	0.0441	0.312	0.0263	0.672	0.0719	0.081	0.014	-0.067	none			SL014288	MO2R1	Q8TD46	131450	CD200R1
4862-63_1	Bone morphogenetic protein type II receptor	121	3.56	0.045	0.315	0.0239	0.0495	0.945	0.092	0.095	0.003	none			SL004133	BMP RII	Q13873	659	BMPR2
2637-77_2	Macrophage mannose receptor	122	3.55	0.0452	0.315	0.0317	0.056	0.618	-0.24	-0.195	0.045	none			SL004579	Macrophage mannose receptor	P22897	4360	MRC1
3616-3_1	N-acetylglucosamine-6-sulfatase	123	3.52	0.0464	0.316	0.115	0.325	0.0377	-0.114	0.052	0.166	none			SL008504	GNS	P15586	2799	GNS
2844-53_2	Tyrosine-protein kinase receptor Tie-1, soluble	124	3.5	0.0469	0.316	0.0276	0.897	0.056	-0.202	-0.012	0.19	none			SL003199	sTie-1	P35590	7075	TIE1
4912-17_1	Aspartate aminotransferase	125	3.5	0.0471	0.316	0.0146	0.194	0.263	-0.432	-0.241	0.191	none			SL000280	GOT1	P17174	2805	GOT1
3606-2_1	Discoidin domain receptor 2	126	3.5	0.0471	0.316	0.0658	0.0151	0.514	0.129	0.176	0.047	none			SL004120	Discoidin domain receptor 2	Q16832	4921	DDR2
2906-55_3	Interleukin-4	127	3.49	0.0476	0.316	0.0435	0.797	0.0374	0.08	0.009	-0.071	none			SL000480	IL-4	P05112	3565	IL4
2381-52_4	Complement C5	128	3.47	0.0482	0.316	0.0534	0.121	0.337	0.253	0.224	-0.029	none			SL000319	C5	P01031	727	C5
3031-66_1	Ferritin	129	3.47	0.0483	0.316	0.0423	0.11	0.588	0.142	0.124	-0.019	none			SL000420	Ferritin	P02794 P02792	2495 2512	FTH1 FTL
2869-68_3	Protein kinase C delta	130	3.46	0.0484	0.316	0.0128	0.0701	0.108	-0.114	-0.489	-0.375	none			SL000554	PKC-D	Q05655	5580	PRKCD
2834-54_1	Kallikrein 8	131	3.41	0.0503	0.323	0.59	0.0253	0.0583	-0.014	-0.066	-0.051	none			SL003915	kallikrein 8	O60259	11202	KLK8
2714-78_2	Endothelial-Monocyte Activating Polypeptide 2	132	3.41	0.0506	0.323	0.862	0.0277	0.0385	-0.017	0.212	0.229	none			SL003334	EMAP-2	Q12904	9255	AIMP1
5034-79_1	Trypsin-2	133	3.4	0.0509	0.323	0.00954	0.0935	0.697	0.114	0.095	-0.019	none			SL010388	Trypsin 2	P07478	5645	PRSS2
2999-6_2	Limbic system-associated membrane protein	134	3.4	0.051	0.323	0.44	0.105	0.0138	-0.076	0.148	0.225	none			SL005196	LSAMP	Q13449	4045	LSAMP
3612-6_4	Ephrin type-B receptor 4	135	3.37	0.0519	0.324	0.072	0.016	0.413	0.071	0.11	0.039	none			SL004845	EphB4	P54760	2050	EPHB4
3421-54_2	CD30 Ligand	136	3.37	0.0519	0.324	0.798	0.0229	0.0551	-0.008	-0.076	-0.068	none			SL004635	CD30 Ligand	P32971	944	TNFSF8
3716-63_2	Inferferon-gamma Receptor 1	137	3.28	0.0558	0.345	0.594	0.073	0.0274	0.02	-0.068	-0.088	none			SL000458	IFN-g R1	P15260	3459	IFNGR1
2578-67_2	Monocyte chemoattractant protein 1	138	3.27	0.0561	0.345	0.252	0.184	0.0307	-0.054	0.074	0.128	none			SL000038	MCP-1	P13500	6347	CCL2
4246-40_2	Neural cell adhesion molecule L1	139	3.2	0.0595	0.36	0.681	0.0691	0.0247	-0.036	0.162	0.198	none			SL004154	NCAM-L1	P32004	3897	L1CAM
5347-59_3	Cyclin B1	140	3.2	0.0596	0.36	0.405	0.153	0.0324	0.029	-0.077	-0.105	none			SL000130	Cyclin B1	P14635	891	CCNB1
2212-69_1	Tissue-type plasminogen activator	141	3.16	0.0614	0.36	0.0509	0.0105	0.773	0.115	0.099	-0.016	none			SL000053	tPA	P00750	5327	PLAT
2828-82_2	Hepatocyte growth factor activator inhibitor type 1	142	3.15	0.0616	0.36	0.0504	0.03	0.599	0.043	0.056	0.013	none			SL004645	HAI-1	O43278	6692	SPINT1
3172-28_2	Arylsulfatase B	143	3.14	0.0623	0.36	0.0709	0.481	0.108	-0.283	-0.043	0.24	none			SL008956	ARSB	P15848	411	ARSB
3806-55_1	Ephrin type-A receptor 5	144	3.13	0.0626	0.36	0.155	0.0546	0.173	0.1	0.169	0.069	none			SL004844	EphA5	P54756	2044	EPHA5
2515-14_3	GDNF family receptor alpha2	145	3.13	0.0629	0.36	0.802	0.0474	0.0399	-0.021	0.17	0.192	none			SL004143	GFRa-2	O00451	2675	GFRA2
3892-21_2	Mediator complex subunit 1	146	3.13	0.063	0.36	0.794	0.0357	0.0447	0.016	-0.121	-0.137	none			SL010328	MED-1	Q15648	5469	MED1
2778-10_2	Interleukin-22	147	3.12	0.0633	0.36	0.0476	0.659	0.0719	0.175	0.034	-0.142	none			SL004347	IL-22	Q9GZX6	50616	IL22
4566-24_3	Roof plate-specific spondin-2, isoform 1	148	3.11	0.0636	0.36	0.957	0.0189	0.0399	-0.003	0.102	0.105	none			SL013989	RSPO2	Q6UXX9	340419	RSPO2
4500-50_2	Stem Cell Growth Factor-alpha	149	3.11	0.0637	0.36	0.408	0.0303	0.122	0.065	0.219	0.154	none			SL004363	SCGF-alpha	Q9Y240	6320	CLEC11A
5079-11_3	GITR/TNFRSF18	150	3.11	0.064	0.36	0.154	0.25	0.0454	0.019	-0.02	-0.039	none			SL004859	GITR	Q9Y5U5	8784	TNFRSF18
5033-27_1	Tropomyosin 1	151	3.1	0.0641	0.36	0.0884	0.227	0.0474	0.036	-0.073	-0.109	none			SL004737	Tropomyosin 1 alpha chain	P09493	7168	TPM1
5097-14_3	Killer cell immunoglobulin-like receptor 3DS1	152	3.09	0.0649	0.36	0.2	0.312	0.0243	0.053	-0.038	-0.091	none			SL014289	KI3S1	Q14943	3813	KIR3DS1
5118-74_2	Reticulon-4/Nogo-A	153	3.09	0.0649	0.36	0.112	0.0313	0.459	0.275	0.377	0.102	none			SL008309	RTN4	Q9NQC3	57142	RTN4
4132-27_2	Follistatin	154	3.05	0.0667	0.367	0.421	0.092	0.0311	0.06	-0.103	-0.162	none			SL000674	FST	P19883	10468	FST
3594-6_1	Cathepsin E	155	3.04	0.0676	0.368	0.333	0.0411	0.0523	-0.129	0.162	0.291	none			SL007121	CATE	P14091	1510	CTSE
2182-54_1	Complement C4b	156	3.03	0.0678	0.368	0.278	0.0558	0.0615	0.135	0.286	0.151	none			SL000318	C4b	P0C0L4 P0C0L5	720 721	C4A C4B
4123-60_2	Fibroblast growth factor 4	157	3.02	0.0684	0.368	0.0904	0.999	0.0509	0.095	0	-0.095	none			SL003171	FGF-4	P08620	2249	FGF4
5223-59_3	Glucokinase (hexokinase 4) regulator/GCKR	158	3.02	0.0686	0.368	0.0162	0.0624	0.825	-0.94	-0.834	0.106	none			SL015728	GCKR	Q14397	2646	GCKR
3204-2_2	Leukotriene A-4 hydrolase	159	2.99	0.0699	0.371	0.0193	0.132	0.532	-0.073	-0.052	0.02	none			SL007100	LKHA4	P09960	4048	LTA4H
4840-73_1	Granulocyte colony-stimulating factor	160	2.99	0.0701	0.371	0.34	0.0642	0.0581	-0.087	-0.224	-0.137	none			SL001729	G-CSF	P09919	1440	CSF3
5193-51_3	KRAS	161	2.96	0.0716	0.374	0.0291	0.364	0.192	0.075	0.026	-0.049	none			SL002542	K-ras	P01116	3845	KRAS
3073-51_2	Interleukin-18 binding protein	162	2.96	0.0717	0.374	0.00187	0.143	0.696	-0.267	-0.215	0.052	8m-18m			SL002508	IL-18 BPa	O95998	10068	IL18BP
3235-50_2	Growth and differentiation factor-associated serum protein 1/GASP1/WFIKKN2	163	2.95	0.0723	0.374	0.0454	0.0796	0.598	-0.256	-0.199	0.057	none			SL010391	WFKN2	Q8TEU8	124857	WFIKKN2
5077-28_3	EPH receptor B2	164	2.95	0.0724	0.374	0.0644	0.692	0.0484	-0.201	0.049	0.25	none			SL007179	EPHB2	P29323	2048	EPHB2
4297-62_3	Spondin-1	165	2.94	0.0731	0.376	0.0207	0.292	0.249	-0.283	-0.145	0.138	none			SL005115	Spondin-1	Q9HCB6	10418	SPON1
4978-54_2	Drebrin-like HIP-55	166	2.92	0.0742	0.379	0.0608	0.797	0.0356	-0.188	0.031	0.219	none			SL011628	DBNL	Q9UJU6	28988	DBNL
3055-54_2	Interleukin-4 receptor alpha chain	167	2.9	0.0754	0.383	0.092	0.119	0.761	0.429	0.448	0.019	none			SL003308	IL-4 sR	P24394	3566	IL4R
2752-62_2	Bone morphogenetic protein-14	168	2.89	0.0758	0.383	0.567	0.0219	0.102	-0.058	-0.231	-0.173	none			SL004329	BMP-14	P43026	8200	GDF5
2731-29_2	NADPH-P450 Oxidoreductase	169	2.88	0.0767	0.384	0.384	0.168	0.041	0.038	-0.076	-0.114	none			SL000528	NADPH-P450 Oxidoreductase	P16435	5447	POR
5343-74_3	Carboxypeptidase E	170	2.87	0.0769	0.384	0.591	0.0752	0.0827	-0.024	-0.13	-0.106	none			SL008703	CBPE	P16870	1363	CPE
3042-7_2	Myoglobin	171	2.86	0.0777	0.386	0.0705	0.675	0.0637	-0.816	-0.155	0.661	none			SL000164	Myoglobin	P02144	4151	MB
4437-56_3	Ectonucleoside triphosphate diphosphohydrolase 5/CD39L4	172	2.84	0.0788	0.387	0.0644	0.0657	0.815	-0.073	-0.066	0.007	none			SL014028	ENTP5	O75356	957	ENTPD5
3470-1_2	E-Selectin	173	2.83	0.0794	0.387	0.0505	0.824	0.0657	-0.231	-0.027	0.204	none			SL001945	sE-Selectin	P16581	6401	SELE
4160-49_1	Matrix metalloproteinase 2/Gelatinase A	174	2.83	0.0794	0.387	0.624	0.144	0.0502	-0.042	0.22	0.262	none			SL000124	MMP-2	P08253	4313	MMP2
3427-63_2	Casein kinase II subunit alpha	175	2.81	0.0807	0.387	0.0486	0.102	0.552	0.114	0.086	-0.029	none			SL007324	CSK21	P68400	1457	CSNK2A1
3773-15_4	Tyrosine-protein kinase receptor Tie-2, soluble/Angiopoietin-1 receptor	176	2.79	0.0822	0.387	0.0434	0.333	0.199	0.131	0.049	-0.082	none			SL003200	sTie-2	Q02763	7010	TEK
2468-62_3	Macrophage inflammatory protein 3 alpha/CCL20	177	2.79	0.0826	0.387	0.263	0.0377	0.169	0.077	0.145	0.068	none			SL000133	MIP-3a	P78556	6364	CCL20
5016-61_2	PARK7/Parkinson protein 7	178	2.79	0.0826	0.387	0.0908	0.79	0.0782	-0.155	0.018	0.173	none			SL008933	PARK7	Q99497	11315	PARK7
2695-25_1	Platelet endothelial cell adhesion molecule	179	2.78	0.0827	0.387	0.575	0.101	0.0441	0.018	-0.054	-0.071	none			SL001721	PECAM-1	P16284	5175	PECAM1
4973-18_1	Apoptosis inhibitor 2/C-IAP2	180	2.78	0.0828	0.387	0.0932	0.0935	0.447	0.109	0.142	0.033	none			SL003728	cIAP-2	Q13489	330	BIRC3
4543-65_2	Collagen alpha-1(XXIII) chain	181	2.78	0.0832	0.387	0.0115	0.126	0.684	-0.319	-0.254	0.065	none			SL014048	CONA1	Q86Y22	91522	COL23A1
4913-78_1	Liver-expressed chemokine/CCL16	182	2.77	0.0833	0.387	0.136	0.0552	0.358	0.111	0.168	0.056	none			SL003300	HCC-4	O15467	6360	CCL16
2875-15_2	TATA-box-binding protein	183	2.77	0.0837	0.387	0.0408	0.0481	0.484	-0.054	-0.082	-0.028	none			SL006923	TBP	P20226	6908	TBP
4956-2_1	Epiregulin	184	2.76	0.084	0.387	0.382	0.0661	0.112	-0.084	-0.257	-0.174	none			SL000139	EPI	O14944	2069	EREG
4440-15_2	Fc receptor-like protein 3	185	2.73	0.0864	0.396	0.757	0.101	0.0606	0.009	-0.063	-0.072	none			SL014088	FCRL3	Q96P31	115352	FCRL3
4957-1_2	Laminin receptor/ribosomal protein SA	186	2.72	0.0873	0.397	0.033	0.137	0.784	-0.18	-0.159	0.021	none			SL004605	40S ribosomal protein SA	P08865	3921	RPSA
3049-61_2	Trypsin	187	2.71	0.0874	0.397	0.517	0.0596	0.13	-0.035	-0.162	-0.127	none			SL000603	Trypsin	P07477	5644	PRSS1
3171-57_2	Amyloid beta A4 protein	188	2.65	0.0919	0.413	0.173	0.0159	0.42	-0.081	-0.128	-0.048	none			SL004469	amyloid precursor protein	P05067	351	APP
4145-58_2	Neurotrophin-3	189	2.65	0.0921	0.413	0.3	0.00975	0.258	-0.048	-0.095	-0.047	none			SL004359	Neurotrophin-3	P20783	4908	NTF3
4900-8_1	Complement C3a anaphylatoxin	190	2.63	0.0933	0.416	0.0796	0.15	0.86	0.593	0.567	-0.026	none			SL000313	C3a	P01024	718	C3
5230-99_3	HMG-CoA reductase	191	2.62	0.0947	0.42	0.985	0.0614	0.0521	-0.002	0.239	0.241	none			SL016557	HMGR	P04035	3156	HMGCR
2789-26_2	Matrix metalloproteinase 7/Matrilysin	192	2.59	0.097	0.428	0.0624	0.338	0.202	0.116	0.04	-0.076	none			SL000525	MMP-7	P09237	4316	MMP7
3336-50_1	Tissue factor pathway inhibitor	193	2.58	0.0973	0.428	0.0425	0.31	0.253	0.123	0.055	-0.068	none			SL001998	TFPI	P10646	7035	TFPI
5012-67_1	Adenylate Kinase 1	194	2.57	0.0982	0.429	0.0508	0.618	0.121	-0.894	-0.224	0.67	none			SL004296	Myokinase, human	P00568	203	AK1
5351-52_3	Heterogeneous nuclear ribonucleoprotein A2/B1	195	2.54	0.1	0.437	0.0264	0.229	0.459	-0.602	-0.408	0.194	none			SL004891	hnRNP A2/B1	P22626	3181	HNRNPA2B1
3519-3_2	Thymus and activation-regulated chemokine/CCL17	196	2.51	0.103	0.445	0.905	0.0945	0.111	-0.002	-0.052	-0.05	none			SL003196	TARC	Q92583	6361	CCL17
3280-49_2	Aggrecan core protein	197	2.51	0.104	0.445	0.856	0.0536	0.053	0.007	-0.061	-0.068	none			SL004661	Aggrecan	P16112	176	ACAN
4909-68_1	Galectin-8	198	2.5	0.104	0.445	0.383	0.0637	0.13	0.052	0.136	0.084	none			SL005167	Galectin-8	O00214	3964	LGALS8
5066-134_3	CMRF35-like molecule 6/CD300c	199	2.47	0.107	0.455	0.0393	0.987	0.0908	0.084	-0.001	-0.085	none			SL014270	CLM6	Q08708	10871	CD300C
3003-29_2	Natural cytotoxicity triggering receptor 3	200	2.45	0.108	0.459	0.0326	0.962	0.0829	0.06	-0.002	-0.062	none			SL005205	NKp30	O14931	259197	NCR3
3802-50_1	Cystatin S	201	2.44	0.109	0.461	0.495	0.00673	0.196	0.048	0.143	0.095	none			SL007888	Cystatin-S	P01036	1472	CST4
2988-57_2	Inducible T-cell co-stimulator	202	2.44	0.11	0.461	0.264	0.0353	0.28	-0.052	-0.1	-0.048	none			SL005170	ICOS	Q9Y6W8	29851	ICOS
5001-6_2	Mammaglobin-B	203	2.42	0.111	0.461	0.863	0.0802	0.113	0.013	0.189	0.175	none			SL001973	Mammaglobin 2	O75556	4246	SCGB2A1
3709-4_2	Alanine aminotransaminase 1	204	2.42	0.111	0.461	0.136	0.0354	0.444	-0.141	-0.233	-0.091	none			SL000617	ALT	P24298	2875	GPT
3373-5_2	Granzyme H	205	2.42	0.112	0.461	0.097	0.954	0.0979	0.055	-0.002	-0.057	none			SL004654	Granzyme H	P20718	2999	GZMH
3056-11_1	Natural killer group 2 member D	206	2.41	0.112	0.461	0.506	0.171	0.068	0.032	-0.086	-0.118	none			SL005204	NKG2D	P26718	22914	KLRK1
3684-78_3	Macrophage scavenger receptor	207	2.39	0.114	0.466	0.0402	0.134	0.544	0.148	0.1	-0.047	none			SL004580	Macrophage scavenger receptor	P21757	4481	MSR1
3622-33_4	Legumain	208	2.37	0.115	0.47	0.0198	0.451	0.263	-0.217	-0.085	0.132	none			SL008909	LGMN	Q99538	5641	LGMN
3738-54_1	Macrophage colony-stimulating factor 1	209	2.36	0.117	0.47	0.0537	0.0842	0.63	-0.147	-0.109	0.038	none			SL002684	CSF-1	P09603	1435	CSF1
4998-50_1	Janus kinase 2	210	2.36	0.117	0.47	0.0627	0.0498	0.486	-0.427	-0.261	0.166	none			SL007025	JAK2	O60674	3717	JAK2
3554-24_1	Adiponectin	211	2.35	0.117	0.47	0.084	0.184	0.555	0.242	0.195	-0.047	none			SL004258	Adiponectin	Q15848	9370	ADIPOQ
3322-52_2	Leucine-rich repeats and Ig-like domains protein 3	212	2.35	0.118	0.47	0.0885	0.068	0.812	-0.113	-0.128	-0.015	none			SL010464	LRIG3	Q6UXM1	121227	LRIG3
4188-1_2	Aflatoxin B1 aldehyde reductase	213	2.34	0.119	0.47	0.0269	0.114	0.84	-0.565	-0.5	0.065	none			SL003658	Aflatoxin B1 aldehyde reductase	O43488	8574	AKR7A2
4969-2_1	Carbonic anhydrase I	214	2.33	0.119	0.47	0.996	0.078	0.0843	0	-0.09	-0.09	none			SL004866	Carbonic anhydrase I	P00915	759	CA1
4271-75_2	Prefoldin subunit 5	215	2.33	0.12	0.47	0.957	0.107	0.0561	-0.008	0.263	0.271	none			SL006705	PFD5	Q99471	5204	PFDN5
3077-66_2	Coagulation Factor Xa	216	2.33	0.12	0.47	0.145	0.0684	0.402	0.131	0.214	0.083	none			SL003324	Coagulation Factor Xa	P00742	2159	F10
2764-20_2	Fibroblast growth factor 9	217	2.32	0.121	0.473	0.0682	0.0499	0.92	0.09	0.085	-0.005	none			SL003849	FGF9	P31371	2254	FGF9
4775-34_3	Gelsolin	218	2.3	0.123	0.476	0.0489	0.203	0.405	0.114	0.064	-0.05	none			SL005572	Gelsolin	P06396	2934	GSN
4551-72_3	G-protein coupled receptor 114	219	2.3	0.123	0.476	0.0756	0.0895	0.385	0.193	0.101	-0.092	none			SL014094	GP114	Q8IZF4	221188	GPR114
3326-58_2	Nectin-like protein 2	220	2.29	0.124	0.476	0.0382	0.494	0.228	-0.078	-0.027	0.051	none			SL004805	Nectin-like protein 2	Q9BY67	23705	CADM1
2668-70_2	Calpain I	221	2.28	0.125	0.478	0.515	0.268	0.0171	-0.059	0.128	0.187	none			SL000337	Calpain I	P07384 P04632	823 826	CAPN1 CAPNS1
2616-23_18	erbB2 /HER2	222	2.28	0.125	0.478	0.166	0.135	0.272	0.313	0.379	0.066	none			SL000009	ERBB2	P04626	2064	ERBB2
4284-18_3	RNA-binding motif protein 39	223	2.27	0.126	0.478	0.0492	0.914	0.153	-0.198	-0.011	0.187	none			SL011535	RBM39	Q14498	9584	RBM39
2607-54_2	Cytokine receptor-like factor 1:Cardiotrophin-like cytokine factor 1 Complex	224	2.27	0.126	0.478	0.101	0.235	0.247	0.119	0.092	-0.027	none			SL004692	CLF-1/CLC Complex	O75462 Q9UBD9	9244 23529	CRLF1 CLCF1
3420-21_2	Carbonic anhydrase XIII	225	2.26	0.127	0.478	0.218	0.0659	0.332	-0.043	-0.074	-0.031	none			SL004869	Carbonic anhydrase XIII	Q8N1Q1	377677	CA13
3195-50_2	Granulysin	226	2.26	0.127	0.478	0.0888	0.712	0.0212	0.069	0.017	-0.053	none			SL000678	Granulysin	P22749	10578	GNLY
5133-17_3	TGF-beta receptor II	227	2.25	0.128	0.479	0.315	0.252	0.0722	0.028	-0.028	-0.056	none			SL002078	TGF-b R II	P37173	7048	TGFBR2
2890-59_2	CCL28	228	2.24	0.129	0.482	0.0728	0.219	0.443	0.073	0.05	-0.023	none			SL003303	CCL28	Q9NRJ3	56477	CCL28
4889-82_1	Wingless-type MMTV integration site family, member 7A	229	2.23	0.13	0.482	0.0611	0.143	0.693	-0.239	-0.192	0.047	none			SL009951	WNT7A	O00755	7476	WNT7A
3607-71_1	Dickkopf-related protein 3	230	2.22	0.131	0.483	0.0579	0.066	0.939	0.17	0.178	0.008	none			SL009412	DKK3	Q9UBP4	27122	DKK3
5090-49_2	Leukocyte immunoglobulin-like receptor subfamily B member 1	231	2.21	0.132	0.483	0.637	0.0775	0.0977	-0.058	0.19	0.248	none			SL005190	ILT-2	Q8NHL6	10859	LILRB1
3173-49_2	Acid ceramidase-like protein	232	2.21	0.132	0.483	0.522	0.174	0.0931	0.018	-0.053	-0.071	none			SL008611	ASAHL	Q02083	27163	NAAA
2704-74_1	Tumor necrosis factor receptor superfamily member 13B	233	2.18	0.136	0.49	0.0951	0.598	0.18	0.166	0.035	-0.13	none			SL004364	TACI	O14836	23495	TNFRSF13B
3050-7_2	von Willebrand factor	234	2.18	0.136	0.49	0.0949	0.615	0.104	-0.179	0.067	0.247	none			SL000017	vWF	P04275	7450	VWF
2993-1_2	Interleukin-18 receptor beta	235	2.18	0.136	0.49	0.0985	0.591	0.0682	0.131	0.041	-0.089	none			SL004861	IL-18 Rb	O95256	8807	IL18RAP
5002-76_1	Matrix metalloproteinase 14/Membrane type matrix metalloproteinase 1	236	2.17	0.137	0.49	0.707	0.0406	0.0995	-0.028	0.111	0.139	none			SL002646	MMP-14	P50281	4323	MMP14
5178-5_3	High affinity cAMP-specific phosphodiesterase 7A/PDE7A	237	2.16	0.138	0.49	0.347	0.306	0.0538	0.085	-0.093	-0.178	none			SL011406	PDE7A	Q13946	5150	PDE7A
5104-57_3	NKp46/NCR1/natural cytotoxicity triggering receptor 1	238	2.16	0.138	0.49	0.693	0.0779	0.145	-0.01	-0.057	-0.047	none			SL005207	NKp46	O76036	9437	NCR1
5132-71_3	Interleukin-27 receptor subunit alpha	239	2.16	0.138	0.49	0.143	0.169	0.761	0.214	0.226	0.012	none			SL005223	TCCR	Q6UWB1	9466	IL27RA
5018-68_1	Peroxiredoxin-6	240	2.14	0.14	0.494	0.0342	0.334	0.369	-0.627	-0.317	0.31	none			SL005694	Peroxiredoxin-6	P30041	9588	PRDX6
4988-49_2	Fibroblast growth factor receptor 4	241	2.14	0.141	0.494	0.572	0.13	0.155	-0.026	-0.144	-0.118	none			SL002036	FGFR4	P22455	2264	FGFR4
2900-53_3	Hemofiltrate CC Chemokine 1/CCL14	242	2.14	0.141	0.494	0.17	0.0897	0.488	0.092	0.13	0.037	none			SL003329	HCC-1	Q16627	6358	CCL14
5459-33_3	Cystatin SN	243	2.13	0.142	0.494	0.907	0.0232	0.12	0.033	0.48	0.447	none			SL010456	CYTN	P01037	1469	CST1
3859-50_2	Proteasome subunit alpha1	244	2.11	0.144	0.496	0.334	0.295	0.0794	0.049	-0.099	-0.148	none			SL010973	PSA1	P25786	5682	PSMA1
2598-9_3	4-1BB/CD137	245	2.11	0.144	0.496	0.432	0.0668	0.158	-0.059	-0.143	-0.083	none			SL004126	4-1BB	Q07011	3604	TNFRSF9
2795-23_3	Alkaline phosphatase, tissue-nonspecific isozyme	246	2.1	0.145	0.496	0.18	0.673	0.0948	-0.4	0.091	0.492	none			SL002077	Alkaline phosphatase, bone	P05186	249	ALPL
3221-54_1	Frizzled-related protein 1, secreted	247	2.1	0.146	0.496	0.0671	0.743	0.17	-0.231	-0.041	0.191	none			SL003770	SARP-2	Q8N474	6422	SFRP1
2839-2_1	OX40 Ligand/Tumor necrosis factor ligand superfamily member 4	248	2.1	0.146	0.496	0.079	0.357	0.189	0.091	0.055	-0.035	none			SL004649	OX40 Ligand	P23510	7292	TNFSF4
2734-49_4	Natural cytotoxicity triggering receptor 2	249	2.09	0.147	0.496	0.0608	0.484	0.217	-0.095	-0.038	0.057	none			SL005206	NKp44	O95944	9436	NCR2
2780-35_2	Lactoferrin	250	2.08	0.148	0.496	0.18	0.691	0.0711	-0.279	0.074	0.353	none			SL000496	Lactoferrin	P02788	4057	LTF
3232-28_2	Tartrate-resistant acid phosphatase type 5	251	2.07	0.149	0.496	0.243	0.0566	0.397	0.216	0.353	0.137	none			SL004118	TrATPase	P13686	54	ACP5
4866-59_2	Neurotrophic tyrosine kinase receptor type 2	252	2.06	0.15	0.496	0.197	0.592	0.112	-0.098	0.023	0.122	none			SL004160	TrkB	Q16620	4915	NTRK2
3010-53_2	Thymic stromal lymphopoietin	253	2.06	0.15	0.496	0.164	0.797	0.0993	0.087	-0.012	-0.099	none			SL004687	TSLP	Q969D9	85480	TSLP
5098-79_3	Killer cell lectin-like receptor subfamily F, member 1	254	2.06	0.15	0.496	0.103	0.785	0.0864	0.053	-0.011	-0.064	none			SL014209	KLRF1	Q9NZS2	51348	KLRF1
5105-2_3	Nogo Receptor/reticulon 4 receptor	255	2.06	0.15	0.496	0.787	0.0859	0.128	0.027	0.205	0.177	none			SL005208	Nogo Receptor	Q9BZR6	65078	RTN4R
3623-84_4	Lymphocyte antigen 86/Myeloid differentiation 1	256	2.06	0.151	0.496	0.0915	0.153	0.737	-0.156	-0.183	-0.026	none			SL007059	LY86	O95711	9450	LY86
5255-22_3	cAMP-specific phosphodiesterase 4D/PDE4D	257	2.06	0.151	0.496	0.199	0.0526	0.544	0.095	0.134	0.038	none			SL011404	PDE4D	Q08499	5144	PDE4D
3200-49_2	Kallikrein-13	258	2.05	0.151	0.496	0.122	0.121	0.778	-0.051	-0.058	-0.007	none			SL003918	kallikrein 13	Q9UKR3	26085	KLK13
3821-28_1	MAPK-activated protein kinase 5	259	2.05	0.151	0.496	0.183	0.407	0.0911	0.059	-0.057	-0.115	none			SL010504	MAPK5	Q8IW41	8550	MAPKAPK5
4436-1_2	Ectonucleoside triphosphate diphosphohydrolase 3/CD39L3	260	2.05	0.152	0.496	0.735	0.0559	0.124	-0.012	-0.064	-0.052	none			SL014093	ENTP3	O75355	956	ENTPD3
3898-5_2	Proteasome subunit p40	261	2.03	0.155	0.502	0.0995	0.101	0.74	-0.16	-0.132	0.028	none			SL007266	PSD7	P51665	5713	PSMD7
4414-69_2	Pulmonary surfactant-associated protein D	262	2.02	0.155	0.502	0.036	0.176	0.81	-0.686	-0.592	0.094	none			SL004484	SP-D	P35247	6441	SFTPD
4462-8_2	RAS p21 protein activator	263	2.02	0.156	0.502	0.99	0.0936	0.106	-0.001	-0.089	-0.089	none			SL013754	RASA1	P20936	5921	RASA1
3290-50_2	CD109	264	2	0.158	0.507	0.0993	0.605	0.205	0.079	0.018	-0.061	none			SL008773	CD109	Q6YHK3	135228	CD109
3593-72_3	Caspase-3	265	2	0.159	0.507	0.0705	0.121	0.686	0.098	0.075	-0.023	none			SL003711	Caspase-3	P42574	836	CASP3
5249-31_3	Serine/threonine kinase 17b (STK17B)/DRAK2	266	1.99	0.159	0.507	0.0359	0.3	0.434	0.107	0.057	-0.05	none			SL016566	DRAK2	O94768	9262	STK17B
3291-30_2	CD23	267	1.98	0.16	0.508	0.869	0.0168	0.153	-0.009	-0.089	-0.08	none			SL002706	CD23	P06734	2208	FCER2
4420-7_2	ADAM metallopeptidase domain 12	268	1.98	0.161	0.508	0.657	0.229	0.0866	0.017	-0.08	-0.097	none			SL009988	ADAM12	O43184	8038	ADAM12
5346-24_3	Copine-1	269	1.96	0.164	0.516	0.045	0.342	0.42	0.403	0.244	-0.159	none			SL011808	CPNE1	Q99829	8904	CPNE1
5130-67_3	Scavenger receptor class F member 2/SREC-II	270	1.96	0.164	0.516	0.264	0.539	0.0477	0.044	-0.023	-0.067	none			SL005222	SREC-II	Q96GP6	91179	SCARF2
3082-9_2	UL16-binding protein 2/NKG2D ligand 2	271	1.95	0.165	0.518	0.172	0.755	0.114	0.06	-0.011	-0.071	none			SL005228	ULBP-2	Q9BZM5	80328	ULBP2
4134-4_2	Heparin-binding EGF-like growth factor	272	1.94	0.167	0.519	0.152	0.128	0.597	0.099	0.128	0.029	none			SL000138	HB-EGF	Q99075	1839	HBEGF
4763-31_3	Afamin	273	1.94	0.167	0.519	0.304	0.372	0.0854	0.049	-0.039	-0.087	none			SL004742	Afamin	P43652	173	AFM
2625-53_4	HSP 90alpha/beta	274	1.92	0.169	0.523	0.105	0.189	0.935	-0.202	-0.194	0.007	none			SL017612	HSP 90a/b	P07900 P08238	None	HSP90AA1 HSP90AB1
4908-6_1	Endoglin	275	1.92	0.169	0.523	0.344	0.0748	0.278	0.074	0.148	0.074	none			SL004482	Endoglin	P17813	2022	ENG
3327-27_1	Netrin-4	276	1.9	0.172	0.528	0.0628	0.293	0.452	0.086	0.051	-0.034	none			SL007673	NET4	Q9HB63	59277	NTN4
5238-26_3	Peptidylprolyl isomerase E (Cyclophilin E)	277	1.9	0.172	0.528	0.078	0.0903	0.888	-0.152	-0.166	-0.015	none			SL013928	PPIE	Q9UNP9	10450	PPIE
5030-52_1	Sirtuin 2	278	1.89	0.173	0.529	0.118	0.101	0.518	-0.236	-0.369	-0.133	none			SL006629	SIRT2	Q8IXJ6	22933	SIRT2
3403-1_2	Tryptase beta-2	279	1.89	0.174	0.53	0.647	0.216	0.0476	-0.023	0.063	0.085	none			SL010617	TPSB2	P20231	64499	TPSB2
2805-6_2	Angiotensin-converting enzyme 2	280	1.88	0.175	0.531	0.117	0.693	0.195	0.146	0.027	-0.119	none			SL004415	ACE2	Q9BYF1	59272	ACE2
4811-33_3	Inter-alpha-trypsin inhibitor heavy chain H4	281	1.87	0.176	0.531	0.169	0.216	0.876	0.593	0.6	0.007	none			SL004739	ITI heavy chain H4	Q14624	3700	ITIH4
5424-55_3	Receptor activator of NF-KB/RANK	282	1.86	0.178	0.531	0.085	0.131	0.998	-0.079	-0.079	0	none			SL003690	RANK	Q9Y6Q6	8792	TNFRSF11A
5000-52_1	Galectin-3 binding protein	283	1.86	0.178	0.531	0.603	0.145	0.0944	-0.033	0.079	0.112	none			SL006522	LG3BP	Q08380	3959	LGALS3BP
5022-61_1	Proteasome activator subunit 1	284	1.86	0.178	0.531	0.0842	0.211	0.91	-0.446	-0.422	0.024	none			SL008176	PSME1	Q06323	5720	PSME1
2859-69_2	Histone deacetylase 8	285	1.86	0.179	0.531	0.241	0.456	0.12	0.032	-0.017	-0.049	none			SL004723	HDAC8	Q9BY41	55869	HDAC8
3488-64_2	Catalase	286	1.85	0.179	0.531	0.0522	0.296	0.497	-0.531	-0.332	0.199	none			SL000342	Catalase	P04040	847	CAT
2994-71_2	Interleukin-1 receptor-like 2	287	1.85	0.181	0.533	0.135	0.812	0.176	0.13	0.015	-0.116	none			SL004875	IL-1Rrp2	Q9HB29	8808	IL1RL2
4886-3_1	Monocyte chemoattractant protein 3	288	1.84	0.182	0.533	0.966	0.115	0.12	-0.006	0.222	0.228	none			SL000516	MCP-3	P80098	6354	CCL7
2693-20_3	Oncostatin M	289	1.84	0.182	0.533	0.674	0.17	0.117	0.02	-0.076	-0.096	none			SL000530	OSM	P13725	5008	OSM
3187-52_2	Cysteine-rich secretory protein 3	290	1.83	0.184	0.537	0.102	0.498	0.115	0.096	0.045	-0.051	none			SL007284	CRIS3	P54108	10321	CRISP3
3025-50_1	Basic fibroblast growth factor	291	1.82	0.185	0.539	0.0585	0.485	0.287	0.312	0.142	-0.17	none			SL000004	bFGF	P09038	2247	FGF2
2969-11_1	Activin receptor-like kinase 1	292	1.81	0.186	0.539	0.197	0.756	0.133	0.122	-0.02	-0.142	none			SL004851	ALK-1	P37023	94	ACVRL1
3448-13_2	Insulin receptor	293	1.79	0.19	0.543	0.084	0.459	0.307	-0.146	-0.055	0.09	none			SL004125	IR	P06213	3643	INSR
3613-62_1	Ficolin-1	294	1.78	0.191	0.543	0.0859	0.101	0.991	0.129	0.13	0.001	none			SL010462	FCN1	O00602	2219	FCN1
4859-6_1	Bone morphogenetic protein receptor type IA	295	1.78	0.191	0.543	0.931	0.133	0.14	-0.007	0.149	0.156	none			SL004080	BMPR1A	P36894	657	BMPR1A
2836-68_2	Lipocalin 2	296	1.78	0.192	0.543	0.647	0.113	0.0972	-0.066	0.166	0.232	none			SL000695	Lipocalin 2	P80188	3934	LCN2
4493-92_1	Interleukin-11	297	1.78	0.192	0.543	0.0992	0.422	0.302	0.087	0.038	-0.049	none			SL000470	IL-11	P20809	3589	IL11
3581-53_3	alpha2-HS-Glycoprotein	298	1.77	0.193	0.543	0.215	0.0238	0.649	-0.139	-0.191	-0.052	none			SL000251	a2-HS-Glycoprotein	P02765	197	AHSG
3504-58_2	LEAP-1/Hepcidin	299	1.77	0.193	0.543	0.197	0.625	0.131	0.063	-0.022	-0.085	none			SL004536	LEAP-1	P81172	57817	HAMP
4987-17_1	Immunoglobulin A Fc receptor	300	1.77	0.193	0.543	0.264	0.133	0.331	0.039	0.07	0.031	none			SL010373	FCAR	P24071	2204	FCAR
4467-49_2	SPARC-like 1 (hevin)	301	1.76	0.194	0.543	0.183	0.632	0.0959	-0.157	0.07	0.227	none			SL005488	SPARCL1	Q14515	8404	SPARCL1
4141-79_1	Interferon-gamma induced protein	302	1.76	0.194	0.543	0.0695	0.245	0.557	-0.118	-0.077	0.041	none			SL003183	IP-10	P02778	3627	CXCL10
3194-36_2	GPVI/Platelet Glycoprotein VI	303	1.76	0.195	0.543	0.553	0.0782	0.201	-0.019	-0.057	-0.038	none			SL008759	GPVI	Q9HCN6	51206	GP6
4697-59_2	Granulocyte-macrophage colony-stimulating factor	304	1.76	0.195	0.543	0.116	0.14	0.73	0.082	0.101	0.019	none			SL001726	GM-CSF	P04141	1437	CSF2
5093-47_3	Jagged-2	305	1.76	0.195	0.543	0.162	0.936	0.15	0.079	-0.004	-0.082	none			SL007774	JAG2	Q9Y219	3714	JAG2
5451-1_3	Activated leukocyte cell adhesion molecule	306	1.75	0.196	0.543	0.0668	0.209	0.594	-0.225	-0.15	0.075	none			SL003166	ALCAM	Q13740	214	ALCAM
3298-52_2	Contactin-4	307	1.74	0.198	0.545	0.0616	0.332	0.144	0.067	-0.18	-0.247	none			SL010454	Contactin-4	Q8IWV2	152330	CNTN4
5029-3_1	Fibroblast activation protein alpha	308	1.74	0.198	0.545	0.046	0.147	0.823	-0.186	-0.218	-0.031	none			SL006528	SEPR	Q12884	2191	FAP
3506-49_1	Lymphotoxin alpha2:beta1	309	1.74	0.199	0.545	0.948	0.0148	0.178	-0.007	-0.167	-0.16	none			SL000508	Lymphotoxin a2/b1	P01374 Q06643	4049 4050	LTA LTB
4491-4_2	Interleukin-5 receptor alpha	310	1.73	0.199	0.545	0.0523	0.177	0.779	0.036	0.03	-0.007	none			SL005188	IL-5 Ra	Q01344	3568	IL5RA
2711-6_2	Ciliary neurotrophic factor receptor alpha	311	1.7	0.204	0.558	0.186	0.12	0.876	0.135	0.146	0.011	none			SL005153	CNTFR alpha	P26992	1271	CNTFR
3635-76_4	Ovarian cancer immunoreactive antigen domain containing 1	312	1.68	0.208	0.563	0.868	0.112	0.129	0.007	-0.062	-0.069	none			SL010530	OCAD1	Q9NX40	54940	OCIAD1
3644-5_4	Soggy-1	313	1.68	0.208	0.563	0.0592	0.578	0.309	0.098	0.032	-0.066	none			SL010381	Soggy-1	Q9UK85	27120	DKKL1
4210-19_2	Dynactin subunit 2	314	1.68	0.209	0.563	0.111	0.217	0.947	0.076	0.074	-0.003	none			SL009207	Dynactin subunit 2	Q13561	10540	DCTN2
2979-8_2	Epithelial-derived neutrophil-activating protein 78/CXCL5	315	1.67	0.21	0.565	0.135	0.685	0.233	0.087	0.017	-0.07	none			SL003169	ENA-78	P42830	6374	CXCL5
4429-51_2	Carbohydrate sulfotransferase 6	316	1.66	0.211	0.566	0.13	0.0804	0.977	-0.09	-0.088	0.002	none			SL014130	CHST6	Q9GZX3	4166	CHST6
3348-49_2	Bone morphogenetic protein-1	317	1.66	0.212	0.566	0.113	0.487	0.297	-0.287	-0.101	0.186	none			SL003994	BMP-1	P13497	649	BMP1
3440-7_2	Granzyme A	318	1.66	0.213	0.567	0.191	0.463	0.105	0.094	-0.116	-0.21	none			SL004298	granzyme A	P12544	3001	GZMA
2939-10_2	Artemin	319	1.65	0.214	0.567	0.163	0.994	0.178	0.091	0	-0.092	none			SL004670	Artemin	Q5T4W7	9048	ARTN
3676-15_3	Insulin-like growth factor II receptor	320	1.65	0.214	0.567	0.135	0.353	0.327	-0.137	-0.05	0.087	none			SL003679	IGF-II receptor	P11717	3482	IGF2R
3206-4_2	Lymphatic vessel endothelial hyaluronic acid receptor 1	321	1.65	0.215	0.567	0.219	0.184	0.608	0.108	0.129	0.02	none			SL008904	LYVE1	Q9Y5Y7	10894	LYVE1
3799-11_2	Carbonic anhydrase III	322	1.64	0.215	0.567	0.0995	0.732	0.213	-0.714	-0.156	0.558	none			SL004867	Carbonic anhydrase III	P07451	761	CA3
3873-51_2	Thyroid peroxidase	323	1.63	0.218	0.568	0.372	0.347	0.117	0.066	-0.052	-0.118	none			SL000588	TMA	P07202	7173	TPO
2609-59_2	Cystatin C	324	1.63	0.218	0.568	0.158	0.202	0.936	0.171	0.164	-0.006	none			SL001777	Cystatin C	P01034	1471	CST3
2816-50_2	Basal Cell Adhesion Molecule	325	1.61	0.221	0.568	0.33	0.369	0.138	0.043	-0.058	-0.101	none			SL001902	BCAM	P50895	4059	BCAM
2633-52_2	Interleukin-13 receptor alpha1	326	1.61	0.223	0.568	0.103	0.777	0.217	0.091	0.017	-0.075	none			SL004149	IL-13 Ra1	P78552	3597	IL13RA1
4128-27_2	Eotaxin-2	327	1.6	0.223	0.568	0.221	0.615	0.0724	0.056	-0.034	-0.09	none			SL003104	Eotaxin-2	O00175	6369	CCL24
3445-53_2	Interleukin-15 receptor alpha	328	1.6	0.223	0.568	0.384	0.37	0.11	0.086	-0.072	-0.158	none			SL004151	IL-15 Ra	Q13261	3601	IL15RA
3832-51_1	Tyrosine-protein kinase 6	329	1.6	0.224	0.568	0.174	0.204	0.903	0.089	0.093	0.005	none			SL010514	PTK6	Q13882	5753	PTK6
2997-8_1	Junctional adhesion molecule B	330	1.6	0.224	0.568	0.433	0.291	0.111	0.097	-0.097	-0.194	none			SL005193	JAM-B	P57087	58494	JAM2
3803-10_2	Cystatin D	331	1.6	0.224	0.568	0.515	0.132	0.132	-0.16	0.22	0.38	none			SL008382	CYTD	P28325	1473	CST5
5349-69_3	Delta-like protein 1 (DLL1)	332	1.6	0.224	0.568	0.155	0.847	0.161	-0.121	0.017	0.138	none			SL006970	DLL1	O00548	28514	DLL1
4155-3_2	Tenascin	333	1.59	0.226	0.568	0.147	0.34	0.352	0.093	0.068	-0.025	none			SL003198	Tenascin	P24821	3371	TNC
3035-80_2	Interleukin-19	334	1.57	0.229	0.568	0.12	0.685	0.21	-0.12	-0.032	0.088	none			SL004354	IL-19	Q9UHD0	29949	IL19
3129-73_2	Tumor necrosis factor receptor superfamily member 10D	335	1.57	0.229	0.568	0.195	0.27	0.524	1.09	1.046	-0.045	none			SL004159	TRAIL R4	Q9UBN6	8793	TNFRSF10D
3743-1_2	Matrix metalloproteinase 10/Stromelysin 2	336	1.57	0.229	0.568	0.0789	0.417	0.412	-0.136	-0.067	0.069	none			SL000645	MMP-10	P09238	4319	MMP10
4919-56_2	Leukemia inhibitory factor receptor extracellular domain	337	1.57	0.23	0.568	0.243	0.217	0.264	0.381	0.461	0.08	none			SL004714	LIF sR	P42702	3977	LIFR
4272-46_2	Glucose phosphate isomerase	338	1.57	0.231	0.568	0.488	0.287	0.182	0.042	-0.359	-0.401	none			SL000539	PHI	P06744	2821	GPI
4924-32_1	Matrix metalloproteinase 1/collagenase 1	339	1.56	0.232	0.568	0.722	0.161	0.119	-0.016	0.056	0.072	none			SL000521	MMP-1	P03956	4312	MMP1
4920-10_1	Lysozyme	340	1.56	0.232	0.568	0.0343	0.361	0.54	-0.353	-0.208	0.146	none			SL000510	Lysozyme	P61626	4069	LYZ
5004-69_1	MAPK 11	341	1.56	0.232	0.568	0.738	0.106	0.105	0.097	0.42	0.323	none			SL007453	MK11	Q15759	5600	MAPK11
3285-23_2	Complement C1r	342	1.56	0.232	0.568	0.621	0.162	0.0486	0.064	0.199	0.135	none			SL000310	C1r	P00736	715	C1R
3855-56_1	Peroxiredoxin-1	343	1.55	0.233	0.568	0.0758	0.264	0.8	-0.452	-0.385	0.067	none			SL004919	Peroxiredoxin-1	Q06830	5052	PRDX1
4967-1_1	Complement C1q subcomponent-binding protein, mitochondrial	344	1.55	0.233	0.568	0.169	0.0669	0.959	-0.128	-0.123	0.005	none			SL008177	C1QBP	Q07021	708	C1QBP
4997-19_1	Eukaryotic translation initiation factor 4A-III	345	1.54	0.235	0.568	0.074	0.19	0.826	-0.183	-0.213	-0.03	none			SL011616	IF4A3	P38919	9775	EIF4A3
4481-34_2	Complement C4	346	1.54	0.235	0.568	0.164	0.122	0.964	0.122	0.125	0.004	none			SL000316	C4	P0C0L4 P0C0L5	720 721	C4A C4B
2781-63_2	Lymphocyte Activation Gene-1/CCL4L1	347	1.54	0.236	0.568	0.182	0.289	0.591	0.2	0.179	-0.02	none			SL004356	LAG-1	Q8NHW4	388372	CCL4L1
2831-29_1	Kallikrein 11	348	1.54	0.236	0.568	0.13	0.929	0.16	0.045	-0.003	-0.048	none			SL002763	Kallikrein 11	Q9UBX7	11012	KLK11
3461-58_1	Brevican	349	1.54	0.236	0.568	0.139	0.292	0.559	0.18	0.131	-0.049	none			SL009089	PGCB	Q96GW7	63827	BCAN
3447-64_2	Interleukin-8	350	1.54	0.237	0.568	0.0585	0.67	0.305	0.052	0.014	-0.037	none			SL000039	IL-8	P10145	3576	IL8
2945-25_1	Estrogen receptor	351	1.53	0.237	0.568	0.131	0.521	0.307	0.104	0.035	-0.07	none			SL000007	ER	P03372	2099	ESR1
3739-72_1	Integrin alpha-IIb: beta-3 complex	352	1.53	0.237	0.568	0.137	0.0762	0.907	-0.118	-0.108	0.01	none			SL000542	gpIIbIIIa	P08514 P05106	3674 3690	ITGA2B ITGB3
4217-49_3	3-hydroxyacyl-CoA dehydrogenase type-2	353	1.53	0.237	0.568	0.917	0.0766	0.195	0.004	0.057	0.053	none			SL004795	ERAB	Q99714	3028	HSD17B10
2706-69_2	Thyroxine-Binding Globulin	354	1.53	0.238	0.568	0.19	0.295	0.279	0.497	0.444	-0.053	none			SL000590	Thyroxine-Binding Globulin	P05543	6906	SERPINA7
3413-50_2	Bcl-2-related protein A1	355	1.53	0.238	0.568	0.0733	0.344	0.617	-0.122	-0.091	0.032	none			SL003703	BFL1	Q16548	597	BCL2A1
2523-31_3	RANTES/CCL5	356	1.53	0.239	0.568	0.126	0.475	0.32	0.163	0.069	-0.094	none			SL000563	RANTES	P13501	6352	CCL5
3844-2_1	Peptidylprolyl isomerase A (Cyclophilin A)	357	1.52	0.239	0.568	0.122	0.136	0.831	0.08	0.093	0.013	none			SL004823	Cyclophilin A	P62937	5478	PPIA
2833-20_1	Kallikrein 4	358	1.52	0.24	0.568	0.645	0.157	0.206	0.012	0.049	0.038	none			SL003800	Kallikrein 4	Q9Y5K2	9622	KLK4
2783-18_2	LD78-beta/CCL3L1	359	1.51	0.242	0.57	0.157	0.929	0.22	0.082	0.004	-0.078	none			SL004355	LD78-beta	P16619	414062	CCL3L1
3169-70_2	alpha-L-iduronidase	360	1.51	0.242	0.57	0.717	0.11	0.166	-0.014	-0.06	-0.046	none			SL010368	IDUA	P35475	3425	IDUA
2681-23_2	Hepatocyte growth factor	361	1.51	0.243	0.57	0.125	0.171	0.75	-0.166	-0.132	0.034	none			SL000441	HGF	P14210	3082	HGF
2938-55_2	Apolipoprotein E4	362	1.5	0.245	0.57	0.207	0.281	0.361	0.717	0.689	-0.028	none			SL004669	Apo E4	P02649	348	APOE
3611-70_4	Endothelin-converting enzyme 1	363	1.49	0.246	0.57	0.0825	0.575	0.339	0.092	0.032	-0.06	none			SL004060	Endothelin-converting enzyme 1	P42892	1889	ECE1
3074-6_2	Lipopolysaccharide-binding protein	364	1.49	0.247	0.57	0.171	0.296	0.742	0.682	0.616	-0.066	none			SL003309	LBP	P18428	3929	LBP
2950-57_2	Insulin-like growth factor-binding protein 4	365	1.48	0.248	0.57	0.93	0.189	0.14	-0.007	-0.123	-0.117	none			SL005171	IGFBP-4	P22692	3487	IGFBP4
3590-8_3	Complement C1s	366	1.47	0.251	0.57	0.35	0.565	0.088	-0.044	0.023	0.067	none			SL000311	C1s	P09871	716	C1S
3423-59_2	Chymase	367	1.47	0.251	0.57	0.21	0.91	0.171	0.079	-0.006	-0.085	none			SL005250	Chymase	P23946	1215	CMA1
3808-76_2	Fibroblast growth factor receptor 2	368	1.46	0.252	0.57	0.24	0.201	0.661	0.092	0.109	0.018	none			SL003990	FGFR-2	P21802	2263	FGFR2
4792-51_2	gp41 C34 peptide, HIV	369	1.46	0.253	0.57	0.26	0.169	0.402	-0.076	-0.148	-0.072	none			SL016148	C34 gp41 HIV Fragment	Q70626	None	Human-virus
4163-5_2	Histone H2A.z	370	1.46	0.253	0.57	0.0689	0.172	0.941	-0.259	-0.274	-0.015	none			SL002093	Histone H2A.z	P0C0S5	3015	H2AFZ
3585-54_4	Extracellular matrix metalloproteinase inducer	371	1.46	0.253	0.57	0.0994	0.136	0.939	0.162	0.172	0.01	none			SL009341	BASI	P35613	682	BSG
3400-49_2	TANK-binding kinase 1	372	1.45	0.255	0.57	0.191	0.905	0.141	0.096	-0.009	-0.106	none			SL007747	TBK1	Q9UHD2	29110	TBK1
2797-56_2	Apolipoprotein B	373	1.44	0.257	0.57	0.125	0.277	0.538	0.08	0.049	-0.032	none			SL000020	Apo B	P04114	338	APOB
3081-70_2	UL16-binding protein 1/NKG2D ligand 1	374	1.44	0.257	0.57	0.158	0.588	0.286	0.101	0.029	-0.071	none			SL005227	ULBP-1	Q9BZM6	80329	ULBP1
3310-62_1	Low affinity immunoglobulin gamma Fc region receptor II-a/b	375	1.44	0.257	0.57	0.103	0.546	0.341	0.072	0.028	-0.044	none			SL017613	FCG2A/B	P12318 P31994	None	FCGR2A FCGR2B
3630-27_4	Nectin-like protein 1	376	1.44	0.257	0.57	0.103	0.211	0.696	0.085	0.062	-0.023	none			SL004804	Nectin-like protein 1	Q8N126	57863	CADM3
2748-3_2	Activin A/Inhibin beta-A homodimer	377	1.44	0.258	0.57	0.36	0.474	0.13	0.143	-0.097	-0.24	none			SL001938	Activin A	P08476	3624	INHBA
3472-40_2	Survivin	378	1.44	0.258	0.57	0.373	0.415	0.146	0.03	-0.025	-0.055	none			SL000582	Survivin	O15392	332	BIRC5
4968-50_1	Macrophage-capping protein	379	1.43	0.259	0.57	0.105	0.14	0.893	-0.195	-0.216	-0.021	none			SL008099	CAPG	P40121	822	CAPG
2636-10_2	Lymphotoxin beta receptor	380	1.43	0.259	0.57	0.29	0.55	0.179	0.078	-0.029	-0.107	none			SL000509	Lymphotoxin b R	P36941	4055	LTBR
2942-50_2	Cytochrome c	381	1.42	0.262	0.57	0.271	0.164	0.41	-0.207	-0.416	-0.21	none			SL000396	Cytochrome c	P99999	54205	CYCS
2760-2_2	Down-regulated in renal cell carcinoma 1	382	1.42	0.262	0.57	0.0433	0.443	0.505	0.047	0.027	-0.02	none			SL004752	DRR1	O95990	11170	FAM107A
5068-54_3	CRTAM/cytotoxic and regulatory T cell molecule	383	1.42	0.262	0.57	0.118	0.61	0.279	0.117	0.042	-0.076	none			SL014208	CRTAM	O95727	56253	CRTAM
2653-62_1	Microtubule-associated protein tau	384	1.42	0.263	0.57	0.214	0.224	0.294	-0.044	-0.174	-0.13	none			SL004230	tau	P10636	4137	MAPT
2891-1_3	CD22	385	1.41	0.263	0.57	0.49	0.318	0.132	0.038	-0.048	-0.086	none			SL004330	CD22	P20273	933	CD22
2976-58_2	Desmoglein-1	386	1.41	0.264	0.57	0.434	0.281	0.151	0.062	-0.052	-0.114	none			SL004856	Desmoglein-1	Q02413	1828	DSG1
2763-66_2	Fibroblast growth factor 20	387	1.41	0.264	0.57	0.479	0.408	0.0774	-0.044	0.045	0.088	none			SL004338	FGF-20	Q9NP95	26281	FGF20
4559-64_2	Kynureninase	388	1.41	0.265	0.57	0.906	0.216	0.0587	0.006	-0.064	-0.07	none			SL013969	KYNU	Q16719	8942	KYNU
3796-79_2	Angiopoietin-related 4	389	1.4	0.268	0.57	0.21	0.305	0.632	0.64	0.587	-0.052	none			SL007642	ANGL4	Q9BY76	51129	ANGPTL4
3222-11_2	Semaphorin 3A	390	1.39	0.268	0.57	0.168	0.486	0.125	0.216	0.12	-0.096	none			SL010379	Semaphorin 3A	Q14563	10371	SEMA3A
4152-58_2	Prekallikrein	391	1.38	0.271	0.57	0.237	0.274	0.783	0.814	0.849	0.035	none			SL000545	Prekallikrein	P03952	3818	KLKB1
4878-3_1	Coagulation Factor X	392	1.38	0.272	0.57	0.348	0.32	0.19	-0.436	0.183	0.618	none			SL000360	Coagulation Factor X	P00742	2159	F10
4712-28_3	Apolipoprotein D	393	1.38	0.272	0.57	0.102	0.278	0.716	-0.171	-0.13	0.04	none			SL005361	Apo D	P05090	347	APOD
5115-31_3	RELT tumor necrosis factor receptor	394	1.38	0.273	0.57	0.0933	0.206	0.54	-0.093	-0.154	-0.06	none			SL005213	RELT	Q969Z4	84957	RELT
3766-51_4	Syntaxin 1A	395	1.36	0.275	0.57	0.162	0.498	0.345	0.034	0.012	-0.022	none			SL004304	STX1a	Q16623	6804	STX1A
5106-52_3	Notch 2	396	1.36	0.275	0.57	0.111	0.199	0.708	0.046	0.06	0.015	none			SL007356	NOTC2	Q04721	4853	NOTCH2
3065-65_1	Fibroblast growth factor 5	397	1.36	0.276	0.57	0.733	0.172	0.256	0.042	0.248	0.206	none			SL004339	FGF-5	P12034	2250	FGF5
2505-49_3	GDNF family receptor alpha3	398	1.36	0.277	0.57	0.247	0.809	0.159	0.062	-0.011	-0.073	none			SL004144	GFRa-3	O60609	2676	GFRA3
2619-72_2	Tumor-associated calcium signal transducer 2	399	1.36	0.277	0.57	0.166	0.492	0.169	0.09	-0.11	-0.2	none			SL001890	GA733-1 protein	P09758	4070	TACSTD2
2911-27_2	Midkine	400	1.35	0.278	0.57	0.299	0.603	0.176	0.061	-0.023	-0.084	none			SL002621	Midkine	P21741	4192	MDK
5268-49_3	Matrix metalloproteinase 16/Membrane-type matrix metalloproteinase 3	401	1.35	0.279	0.57	0.152	0.679	0.273	0.077	0.02	-0.056	none			SL003331	MMP-16	P51512	4325	MMP16
2750-3_2	Apolipoprotein A-I	402	1.35	0.28	0.57	0.2	0.362	0.238	0.19	0.15	-0.041	none			SL000019	Apo A-I	P02647	335	APOA1
4771-10_3	Sphingomyelin phosphodiesterase, acid-like 3A	403	1.34	0.281	0.57	0.152	0.231	0.701	0.161	0.121	-0.04	none			SL012754	ASM3A	Q92484	10924	SMPDL3A
5261-13_3	v-abl Abelson murine leukemia viral oncogene homolog 2	404	1.34	0.281	0.57	0.131	0.764	0.272	0.099	0.02	-0.079	none			SL010488	ABL2	P42684	27	ABL2
5262-57_3	BCAR3 breast cancer anti-estrogen resistance 3	405	1.34	0.281	0.57	0.0782	0.713	0.328	0.112	0.029	-0.083	none			SL014470	BCAR3	O75815	8412	BCAR3
2985-35_1	Gro-alpha	406	1.34	0.281	0.57	0.303	0.697	0.137	0.075	-0.023	-0.098	none			SL003173	Gro-a	P09341	2919	CXCL1
4533-76_2	ADAM metallopeptidase with thrombospondin motifs 15	407	1.34	0.281	0.57	0.209	0.204	0.698	-0.061	-0.077	-0.016	none			SL012740	ATS15	Q8TE58	170689	ADAMTS15
3608-12_1	Dipeptidyl-peptidase II	408	1.34	0.281	0.57	0.19	0.408	0.0604	0.561	0.401	-0.16	none			SL008916	DPP2	Q9UHL4	29952	DPP7
3708-62_1	alpha2-Macroglobulin	409	1.34	0.282	0.57	0.732	0.147	0.128	0.038	0.154	0.116	none			SL000252	a2-Macroglobulin	P01023	2	A2M
3587-53_1	Bone morphogenetic protein-10	410	1.34	0.282	0.57	0.128	0.173	0.885	0.124	0.111	-0.013	none			SL007056	BMP10	O95393	27302	BMP10
2972-57_2	Bone morphogenetic protein-7	411	1.33	0.283	0.57	0.314	0.621	0.108	-0.094	0.054	0.148	none			SL004078	BMP-7	P18075	655	BMP7
5301-7_3	Eotaxin/CCL11	412	1.33	0.283	0.57	0.15	0.81	0.259	0.083	0.013	-0.07	none			SL000406	Eotaxin	P51671	6356	CCL11
2827-23_2	Fractalkine/CX3CL-1	413	1.33	0.283	0.57	0.465	0.151	0.18	0.139	-0.123	-0.262	none			SL000427	Fractalkine/CX3CL-1	P78423	6376	CX3CL1
2723-9_2	Interleukin-37	414	1.33	0.283	0.57	0.588	0.124	0.164	0.071	-0.111	-0.182	none			SL005178	IL-1F7	Q9NZH6	27178	IL1F7
2580-83_2	Myeloperoxidase	415	1.33	0.283	0.57	0.161	0.625	0.33	-0.142	-0.033	0.109	none			SL001796	Myeloperoxidase	P05164	4353	MPO
2449-1_4	Phospholipase A2, Group V	416	1.33	0.284	0.57	0.0927	0.533	0.18	0.077	-0.079	-0.156	none			SL004182	GV	P39877	5322	PLA2G5
5354-11_3	Keratin 18	417	1.33	0.284	0.57	0.322	0.185	0.38	-0.12	-0.276	-0.156	none			SL000655	Keratin 18	P05783	3875	KRT18
4544-4_3	Connective-tissue activating peptide III	418	1.33	0.285	0.57	0.217	0.322	0.595	1.17	1.062	-0.108	none			SL004708	CTAP-III	P02775	5473	PPBP
3437-80_3	Receptor-type tyrosine-protein kinase FLT3	419	1.33	0.285	0.57	0.905	0.193	0.171	-0.007	-0.086	-0.079	none			SL004636	Flt-3	P36888	2322	FLT3
3122-6_2	Diablo, IAP-binding mitochondrial protein	420	1.33	0.285	0.57	0.16	0.32	0.518	-0.124	-0.075	0.049	none			SL003733	SMAC	Q9NR28	56616	DIABLO
2455-17_4	Interleukin-12	421	1.32	0.286	0.57	0.276	0.713	0.17	0.099	-0.028	-0.128	none			SL001716	IL-12	P29459 P29460	3592 3593	IL12A IL12B
2501-51_3	Cadherin-1	422	1.32	0.287	0.57	0.0789	0.22	0.392	-0.06	-0.152	-0.092	none			SL000055	Cadherin E	P12830	999	CDH1
3399-31_2	Stabilin-2	423	1.32	0.287	0.57	0.228	0.231	0.936	-0.059	-0.062	-0.002	none			SL007560	STAB2	Q8WWQ8	55576	STAB2
4453-83_3	Leucine-rich repeat transmembrane neuronal protein 3	424	1.32	0.288	0.57	0.186	0.737	0.178	-0.15	0.05	0.2	none			SL014108	LRRT3	Q86VH5	347731	LRRTM3
4337-49_2	C-reactive protein	425	1.31	0.288	0.57	0.871	0.283	0.247	-0.006	-0.188	-0.182	none			SL000051	CRP	P02741	1401	CRP
3741-4_3	Interleukin-5	426	1.31	0.288	0.57	0.121	0.537	0.385	0.091	0.034	-0.057	none			SL000481	IL-5	P05113	3567	IL5
5357-60_3	Neuroligin 4, X-linked	427	1.31	0.29	0.57	0.143	0.716	0.26	-0.068	-0.018	0.05	none			SL014113	NLGNX	Q8N0W4	57502	NLGN4X
3498-53_2	Interleukin-17	428	1.31	0.29	0.57	0.84	0.124	0.267	-0.007	-0.056	-0.049	none			SL001713	IL-17	Q16552	3605	IL17A
3509-1_1	Macrophage inflammatory protein 5/CCL15	429	1.3	0.291	0.57	0.367	0.495	0.155	0.055	-0.042	-0.097	none			SL003190	MIP-5	Q16663	6359	CCL15
2960-66_2	Properdin	430	1.3	0.291	0.57	0.27	0.276	0.173	0.468	0.522	0.054	none			SL003192	Properdin	P27918	5199	CFP
3452-17_2	Proto-oncogene tyrosine-protein kinase LCK	431	1.3	0.291	0.57	0.259	0.85	0.158	0.073	-0.011	-0.084	none			SL006916	LCK	P06239	3932	LCK
3281-19_1	Angiopoietin-related 3	432	1.3	0.291	0.57	0.162	0.552	0.339	0.1	0.036	-0.064	none			SL006803	ANGL3	Q9Y5C1	27329	ANGPTL3
5013-2_1	Nuclear chloride ion channel 27	433	1.3	0.292	0.57	0.164	0.268	0.847	0.405	0.36	-0.045	none			SL004915	NCC27	O00299	1192	CLIC1
3761-4_2	Cyclooxygenase-2	434	1.3	0.292	0.57	0.775	0.166	0.248	-0.007	-0.043	-0.036	none			SL000027	COX-2	P35354	5743	PTGS2
3848-14_2	Glyceraldehyde-3-phosphate dehydrogenase	435	1.3	0.293	0.57	0.45	0.43	0.141	0.164	-0.235	-0.399	none			SL003785	GAPDH, liver	P04406	2597	GAPDH
4158-54_2	Urokinase-type plasminogen activator	436	1.29	0.293	0.57	0.575	0.325	0.227	0.017	-0.177	-0.194	none			SL000613	uPA	P00749	5328	PLAU
3323-37_1	Apolipoprotein E receptor 2/LRP8	437	1.29	0.295	0.57	0.232	0.816	0.204	0.086	-0.015	-0.101	none			SL004610	LRP8	Q14114	7804	LRP8
3284-75_1	Biglycan	438	1.29	0.295	0.57	0.123	0.448	0.457	-0.236	-0.144	0.092	none			SL007804	BGN	P21810	633	BGN
5021-13_1	Inorganic pyrophosphatase	439	1.29	0.295	0.57	0.165	0.202	0.874	-0.124	-0.138	-0.015	none			SL004914	PPase	Q15181	5464	PPA1
3302-58_1	Cystatin F	440	1.28	0.296	0.571	0.175	0.705	0.297	0.095	0.021	-0.074	none			SL007049	CYTF	O76096	8530	CST7
3034-1_2	Glial fibrillary acidic protein	441	1.28	0.298	0.572	0.961	0.218	0.17	0.002	-0.049	-0.05	none			SL004271	GFAP	P14136	2670	GFAP
3394-81_2	Serine-threonine-protein kinase PLK1	442	1.27	0.299	0.572	0.245	0.101	0.839	-0.095	-0.11	-0.015	none			SL005258	PLK-1	P53350	5347	PLK1
4922-13_1	Macrophage inflammatory protein 3 beta/CCL19	443	1.27	0.299	0.572	0.152	0.679	0.3	-0.114	-0.032	0.082	none			SL003189	MIP-3b	Q99731	6363	CCL19
4994-178_1	Heterogeneous nuclear ribonucleoprotein K	444	1.27	0.301	0.572	0.339	0.155	0.472	0.038	0.068	0.03	none			SL002756	hnRNP K	P61978	3190	HNRNPK
4993-16_1	Glutathione S-transferase A3	445	1.26	0.301	0.572	0.233	0.134	0.552	0.139	0.245	0.106	none			SL000670	GSTA3	Q16772	2940	GSTA3
3045-72_2	Pleiotrophin	446	1.26	0.302	0.572	0.433	0.146	0.379	0.264	0.524	0.26	none			SL002704	PTN	P21246	5764	PTN
5036-50_1	Tumor necrosis factor-inducible gene 6 protein	447	1.26	0.303	0.572	0.208	0.836	0.257	-0.194	-0.024	0.17	none			SL004782	TSG-6	P98066	7130	TNFAIP6
5089-11_3	Interleukin-7 receptor subunit alpha	448	1.26	0.303	0.572	0.126	0.7	0.315	0.048	0.013	-0.035	none			SL005189	IL-7 Ra	P16871	3575	IL7R
5337-64_3	B7-2/CD86	449	1.26	0.303	0.572	0.353	0.0978	0.534	0.039	0.066	0.027	none			SL004131	B7-2	P42081	942	CD86
4807-13_3	Collagen alpha-1(VIII) chain	450	1.26	0.303	0.572	0.32	0.349	0.241	-0.472	0.086	0.558	none			SL008072	CO8A1	P27658	1295	COL8A1
4774-62_3	Protein FAM107B	451	1.24	0.308	0.572	0.154	0.308	0.664	-0.062	-0.045	0.017	none			SL016129	FAM107B	Q9H098	83641	FAM107B
3449-58_2	Kallistatin	452	1.24	0.308	0.572	0.259	0.307	0.867	0.524	0.534	0.01	none			SL004876	Kallistatin	P29622	5267	SERPINA4
3815-14_1	Interleukin-12 receptor beta2	453	1.24	0.308	0.572	0.193	0.412	0.208	0.037	-0.099	-0.136	none			SL007620	IL-12 RB2	Q99665	3595	IL12RB2
3642-4_1	Signaling lymphocytic activation molecule 5	454	1.24	0.309	0.572	0.143	0.283	0.675	0.157	0.112	-0.045	none			SL008588	SLAF5	Q9UIB8	8832	CD84
2190-55_1	Coagulation Factor XI	455	1.23	0.31	0.572	0.329	0.67	0.183	0.041	-0.012	-0.053	none			SL002662	Coagulation Factor XI	P03951	2160	F11
2937-10_2	Apolipoprotein E3	456	1.23	0.31	0.572	0.271	0.301	0.228	0.475	0.504	0.029	none			SL004668	Apo E3	P02649	348	APOE
2643-57_2	Cadherin-3	457	1.23	0.311	0.572	0.249	0.122	0.678	-0.107	-0.152	-0.044	none			SL004183	P-Cadherin	P22223	1001	CDH3
4557-61_2	Kirrel3	458	1.23	0.311	0.572	0.966	0.263	0.0815	0.002	-0.067	-0.069	none			SL014111	KIRR3	Q8IZU9	84623	KIRREL3
3396-54_2	Renin	459	1.23	0.312	0.572	0.712	0.296	0.182	0.019	-0.068	-0.087	none			SL000565	Renin	P00797	5972	REN
3685-53_1	Membrane frizzled-related protein/MFRP	460	1.23	0.312	0.572	0.203	0.356	0.539	0.087	0.063	-0.024	none			SL010466	MFRP	Q9BY79	83552	MFRP
5024-67_1	Retinoblastoma 1	461	1.22	0.313	0.572	0.187	0.698	0.31	0.068	0.015	-0.052	none			SL002522	Rb	P06400	5925	RB1
4282-3_2	GTP-binding nuclear protein Ran	462	1.22	0.313	0.572	0.239	0.211	0.589	0.249	0.368	0.119	none			SL005034	RAN	P62826	5901	RAN
4249-64_2	Nucleoside diphosphate kinase B	463	1.22	0.313	0.572	0.233	0.928	0.0648	0.089	0.007	-0.082	none			SL004921	NDP kinase B	P22392	4831	NME2
2879-9_2	alpha1-Antichymotrypsin	464	1.22	0.313	0.572	0.252	0.326	0.672	1.17	1.13	-0.04	none			SL000248	a1-Antichymotrypsin	P01011	12	SERPINA3
3283-21_1	Transforming growth factor beta induced protein	465	1.22	0.314	0.572	0.462	0.17	0.352	0.093	0.202	0.11	none			SL006544	BGH3	Q15582	7045	TGFBI
4495-33_2	Kininogen-1, HMW, Single chain	466	1.21	0.315	0.572	0.249	0.335	0.402	0.93	0.874	-0.055	none			SL017189	Kininogen, HMW	P01042	3827	KNG1
4192-10_2	Alcohol dehydrogenase (NADP+)/Ado-keto reductase family 1 member A1	467	1.21	0.316	0.572	0.136	0.325	0.863	-0.286	-0.256	0.03	none			SL008039	AK1A1	P14550	10327	AKR1A1
4991-12_1	Glypican-5	468	1.21	0.316	0.572	0.619	0.0583	0.354	0.025	0.075	0.05	none			SL012469	GPC5	P78333	2262	GPC5
3182-38_2	CD39	469	1.21	0.316	0.572	0.925	0.228	0.192	0.003	-0.046	-0.049	none			SL010371	CD39	P49961	953	ENTPD1
5032-64_1	FACT complex subunit SSRP1	470	1.21	0.318	0.573	0.132	0.256	0.74	0.049	0.037	-0.012	none			SL009868	SSRP1	Q08945	6749	SSRP1
2829-19_2	Interleukin-27	471	1.2	0.319	0.573	0.187	0.72	0.316	0.071	0.015	-0.056	none			SL006915	IL-27	Q8NEV9 Q14213	246778 10148	IL27 EBI3
4542-24_2	Clusterin	472	1.2	0.319	0.573	0.224	0.393	0.303	0.1	0.076	-0.024	none			SL001896	Clusterin	P10909	1191	CLU
5100-53_3	LIMPII/SCARB2	473	1.2	0.32	0.573	0.609	0.33	0.257	0.017	-0.51	-0.528	none			SL005197	LIMP II	Q14108	950	SCARB2
3388-58_2	p21-activated kinase 7	474	1.19	0.321	0.575	0.776	0.161	0.277	-0.014	-0.079	-0.065	none			SL010510	PAK7	Q9P286	57144	PAK7
2624-31_2	Protein E7 (Human Papillomavirus Type 18)	475	1.19	0.324	0.578	0.37	0.167	0.462	-0.039	-0.074	-0.035	none			SL004698	HPV E7 Type18	P06788	1489089	Human-virus
3881-49_2	Dynein light chain 1	476	1.18	0.326	0.58	0.164	0.279	0.318	-0.065	-0.359	-0.294	none			SL003753	DLC8	P63167	8655	DYNLL1
4125-52_2	RAGE, soluble/Advanced glycosylation end product-specific receptor	477	1.18	0.327	0.58	0.625	0.0119	0.21	-0.2	0.315	0.514	none			SL003680	sRAGE	Q15109	177	AGER
4430-44_3	Collectin Kidney 1	478	1.18	0.327	0.58	0.702	0.276	0.169	0.105	-0.293	-0.397	none			SL006713	Collectin Kidney 1	Q9BWP8	78989	COLEC11
3044-3_2	Macrophage inflammatory protein 4/Pulmonary and activation-regulated chemokine/CCL18	479	1.17	0.327	0.58	0.75	0.366	0.171	0.051	-0.283	-0.334	none			SL003323	PARC	P55774	6362	CCL18
5124-69_3	Intercellular adhesion molecule 5	480	1.16	0.33	0.58	0.0955	0.319	0.748	-0.176	-0.133	0.043	none			SL005169	sICAM-5	Q9UMF0	7087	ICAM5
5259-2_3	TAK1-TAB1 fusion	481	1.16	0.33	0.58	0.17	0.718	0.323	0.122	0.03	-0.092	none			SL016567	TAK1-TAB1	O43318 Q15750	6885 10454	MAP3K7 TAB1
3389-7_2	Protein C Inhibitor	482	1.16	0.331	0.58	0.224	0.421	0.237	0.225	0.165	-0.06	none			SL000550	PCI	P05154	5104	SERPINA5
2819-23_2	Cadherin-5	483	1.16	0.332	0.58	0.975	0.201	0.211	0.003	0.137	0.134	none			SL002081	Cadherin-5	P33151	1003	CDH5
5140-56_3	Netrin receptor UNC5H4	484	1.16	0.333	0.58	0.121	0.569	0.419	-0.133	-0.056	0.077	none			SL005231	UNC5H4	Q6UXZ4	137970	UNC5D
3495-15_2	Granulocyte chemotactic protein 2/CXCL6	485	1.15	0.333	0.58	0.222	0.176	0.809	-0.05	-0.061	-0.011	none			SL003172	GCP-2	P80162	6372	CXCL6
3192-3_2	Glutamate carboxypeptidase	486	1.15	0.333	0.58	0.15	0.379	0.654	-0.071	-0.052	0.019	none			SL002695	Glutamate carboxypeptidase	Q96KP4	55748	CNDP2
5307-12_3	Coagulation Factor IXab	487	1.15	0.334	0.58	0.968	0.271	0.0575	-0.007	-0.206	-0.199	none			SL004400	Coagulation Factor IXab	P00740	2158	F9
4153-11_2	PSA:alpha-1-antichymotrypsin complex	488	1.15	0.335	0.58	0.271	0.323	0.943	0.475	0.482	0.007	none			SL000091	PSA-ACT	P07288 P01011	354 12	KLK3 SERPINA3
2677-1_1	erbB1/HER1	489	1.15	0.335	0.58	0.211	0.241	0.777	0.116	0.094	-0.022	none			SL002644	ERBB1	P00533	1956	EGFR
3069-52_3	Immunoglobulin M	490	1.15	0.335	0.58	0.398	0.253	0.0984	0.206	0.311	0.105	none			SL000468	IgM	P01871	3507 3512 50802 3535	IGHM IGJ IGK@ IGL@
5026-66_1	Ribosomal protein S3	491	1.14	0.336	0.58	0.183	0.426	0.501	0.117	0.076	-0.041	none			SL008059	RS3	P23396	6188	RPS3
3603-60_4	Dectin-1	492	1.14	0.337	0.58	0.241	0.129	0.811	0.055	0.067	0.012	none			SL007640	CLC7A	Q9BXN2	64581	CLEC7A
2617-56_35	erbB3/HER3	493	1.14	0.337	0.58	0.261	0.353	0.378	0.541	0.503	-0.039	none			SL002519	ERBB3	P21860	2065	ERBB3
2991-9_2	Interleukin-1 receptor 1	494	1.13	0.339	0.582	0.453	0.414	0.194	0.025	-0.02	-0.046	none			SL001997	IL-1 sRI	P14778	3554	IL1R1
5116-62_2	Roundabout axon guidance molecule 2, ROBO2	495	1.13	0.341	0.584	0.503	0.453	0.154	-0.057	0.072	0.129	none			SL007680	ROBO2	Q9HCK4	6092	ROBO2
3795-6_2	ADAM metallopeptidase domain 9	496	1.12	0.342	0.585	0.849	0.249	0.212	-0.009	0.061	0.07	none			SL004642	ADAM 9	Q13443	8754	ADAM9
3651-50_5	Vascular endothelial growth factor receptor 2	497	1.12	0.344	0.585	0.171	0.194	0.987	0.069	0.068	-0.001	none			SL003201	VEGF sR2	P35968	3791	KDR
3891-56_1	Methyl-CpG-binding domain protein 4	498	1.12	0.344	0.585	0.244	0.91	0.241	0.099	0.008	-0.091	none			SL009629	MBD4	O95243	8930	MBD4
3024-18_2	alpha2-Antiplasmin	499	1.11	0.345	0.586	0.377	0.661	0.0801	0.055	-0.035	-0.091	none			SL000250	a2-Antiplasmin	P08697	5345	SERPINF2
3800-71_2	Creatine kinase-BB	500	1.11	0.347	0.588	0.477	0.536	0.103	-0.109	0.119	0.227	none			SL000377	CK-BB	P12277	1152	CKB
3104-8_2	DEAD box RNA helicase 19B	501	1.1	0.35	0.591	0.196	0.14	0.913	-0.055	-0.05	0.005	none			SL004750	DEAD-box protein 19B	Q9UMR2	11269	DDX19B
5183-53_3	AMP Kinase (alpha1beta1gamma1)	502	1.1	0.35	0.591	0.177	0.607	0.393	0.057	0.019	-0.038	none			SL016548	AMPK a1b1g1	Q13131 Q9Y478 P54619	5562 5564 5571	PRKAA1 PRKAB1 PRKAG1
3813-3_2	Proto-oncogene tyrosine-protein kinase Fyn	503	1.1	0.35	0.591	0.236	0.267	0.867	0.221	0.246	0.024	none			SL006913	FYN	P06241	2534	FYN
2192-63_10	Cutaneous T-cell-attracting chemokine/CCL27	504	1.09	0.352	0.591	0.263	0.91	0.224	0.078	0.007	-0.072	none			SL003168	CTACK	Q9Y4X3	10850	CCL27
3414-40_2	Tyrosine kinase Etk	505	1.09	0.352	0.591	0.314	0.82	0.202	0.054	-0.01	-0.064	none			SL006374	BMX	P51813	660	BMX
2864-2_3	MAPK kinase 1	506	1.09	0.354	0.592	0.264	0.185	0.818	0.413	0.491	0.079	none			SL003793	MEK1	Q02750	5604	MAP2K1
2944-66_2	Neuroblastoma suppressor of tumorigenicity 1	507	1.09	0.354	0.592	0.56	0.24	0.208	-0.104	0.123	0.227	none			SL005156	DAN	P41271	4681	NBL1
3497-13_2	Inferferon-alpha2	508	1.08	0.356	0.592	0.576	0.122	0.39	0.022	0.059	0.037	none			SL002075	IFN-aA	P01563	3440	IFNA2
2620-4_2	Interleukin-6 receptor subunit beta/gp130	509	1.08	0.356	0.592	0.242	0.323	0.954	0.063	0.061	-0.002	none			SL003872	gp130, soluble	P40189	3572	IL6ST
4556-10_2	Interleukin-34	510	1.08	0.356	0.592	0.179	0.335	0.611	-0.078	-0.048	0.029	none			SL013548	IL-34	Q6ZMJ4	146433	IL34
3489-9_2	Ciliary Neurotrophic Factor	511	1.07	0.358	0.592	0.217	0.303	0.952	0.058	0.056	-0.002	none			SL004331	CNTF	P26441	1270	CNTF
4568-17_2	SLIT and NTRK-like protein 5	512	1.07	0.358	0.592	0.271	0.697	0.179	-0.186	0.096	0.281	none			SL014070	SLIK5	O94991	26050	SLITRK5
3415-61_2	Bone sialoprotein 2	513	1.07	0.36	0.592	0.269	0.864	0.257	0.083	-0.011	-0.093	none			SL004660	BSP	P21815	3381	IBSP
3665-64_3	Collectin placenta 1	514	1.07	0.36	0.592	0.208	0.92	0.299	0.073	0.005	-0.068	none			SL007471	COLEC12	Q5KU26	81035	COLEC12
3152-57_1	Tumor necrosis factor receptor superfamily member 1B	515	1.06	0.361	0.592	0.641	0.343	0.186	0.03	-0.062	-0.092	none			SL001800	TNF sR-II	P20333	7133	TNFRSF1B
4146-58_2	Neurotrophin-5	516	1.06	0.362	0.592	0.147	0.556	0.441	0.053	0.025	-0.027	none			SL004360	Neurotrophin-5	P34130	4909	NTF4
4962-52_1	Conserved dopamine neurotrophic factor	517	1.06	0.362	0.592	0.32	0.292	0.662	0.093	0.109	0.016	none			SL012538	ARMEL	Q49AH0	441549	CDNF
4237-70_3	Leucine carboxyl methyltransferase 1	518	1.06	0.363	0.592	0.169	0.397	0.712	-0.087	-0.068	0.019	none			SL011770	LCMT1	Q9UIC8	51451	LCMT1
3299-29_2	Contactin-5	519	1.06	0.363	0.592	0.632	0.398	0.218	0.03	-0.106	-0.137	none			SL010455	Contactin-5	O94779	53942	CNTN5
4435-66_2	Alkaline Sphingomyelinase	520	1.06	0.363	0.592	0.33	0.287	0.602	0.131	0.157	0.026	none			SL009045	ENPP7	Q6UWV6	339221	ENPP7
5017-19_1	Peroxiredoxin-5	521	1.05	0.366	0.594	0.227	0.399	0.561	0.074	0.052	-0.023	none			SL004932	Peroxiredoxin-5	P30044	25824	PRDX5
2424-69_4	Basic fibroblast growth factor receptor 1	522	1.04	0.369	0.594	0.442	0.534	0.184	-0.047	0.041	0.088	none			SL003060	bFGF-R	P11362	2260	FGFR1
2590-69_4	Tyrosine-protein kinase transmembrane receptor ROR1	523	1.04	0.371	0.594	0.207	0.458	0.459	-0.136	-0.052	0.084	none			SL006114	ROR1	Q01973	4919	ROR1
3184-25_2	Coagulation Factor VII	524	1.04	0.371	0.594	0.776	0.195	0.166	0.057	0.24	0.183	none			SL000358	Coagulation Factor VII	P08709	2155	F7
3360-50_4	Serine-threonine-protein kinase Chk2	525	1.03	0.373	0.594	0.257	0.447	0.129	0.486	0.359	-0.127	none			SL003726	Chk2	O96017	11200	CHEK2
2484-49_3	Tumor necrosis factor ligand superfamily member 12	526	1.03	0.373	0.594	0.684	0.326	0.226	0.027	-0.074	-0.1	none			SL004365	TWEAK	O43508	8742	TNFSF12
5128-53_3	SLAM family member 6/NTB-A	527	1.03	0.373	0.594	0.259	0.444	0.0251	0.352	0.267	-0.085	none			SL014228	SLAF6	Q96DU3	114836	SLAMF6
4294-16_2	Sphingosine kinase 1	528	1.03	0.373	0.594	0.473	0.22	0.347	-0.09	-0.16	-0.07	none			SL006088	Sphingosine kinase 1	Q9NYA1	8877	SPHK1
4832-75_2	Tumor necrosis factor receptor superfamily member 10A	529	1.03	0.374	0.594	0.503	0.457	0.206	0.049	-0.072	-0.121	none			SL004156	TRAIL R1	O00220	8797	TNFRSF10A
3485-28_2	beta2-Microglobulin	530	1.03	0.374	0.594	0.528	0.482	0.155	-0.047	0.053	0.1	none			SL000283	b2-Microglobulin	P61769	567	B2M
3054-3_2	Haptoglobin	531	1.02	0.375	0.594	0.269	0.416	0.0314	0.457	0.376	-0.08	none			SL000437	Haptoglobin, Mixed Type	P00738	3240	HP
5134-52_2	Hepatitis A virus cellular receptor 2/Tim-3	532	1.02	0.375	0.594	0.205	0.317	0.723	0.143	0.107	-0.036	none			SL007547	TIMD3	Q8TDQ0	84868	HAVCR2
3508-78_3	Macrophage-derived chemokine	533	1.02	0.376	0.594	0.222	0.895	0.223	0.061	-0.008	-0.069	none			SL003187	MDC	O00626	6367	CCL22
4162-54_2	Transferrin	534	1.02	0.376	0.594	0.348	0.318	0.0912	0.823	0.991	0.168	none			SL000601	Transferrin	P02787	7018	TF
2952-75_2	Insulin-like growth factor I	535	1.02	0.376	0.594	0.285	0.205	0.636	0.079	0.121	0.042	none			SL000047	IGF-I	P05019	3479	IGF1
5363-51_3	Semaphorin-3E	536	1.02	0.377	0.594	0.326	0.0688	0.811	-0.077	-0.095	-0.018	none			SL010470	Semaphorin 3E	O15041	9723	SEMA3E
4368-8_2	beta-nerve growth factor	537	1.02	0.377	0.594	0.896	0.246	0.208	-0.007	0.061	0.068	none			SL000305	b-NGF	P01138	4803	NGF
2889-37_2	Cardiotrophin-1	538	1.02	0.378	0.594	0.303	0.46	0.353	-0.202	-0.02	0.181	none			SL002783	Cardiotrophin-1	Q16619	1489	CTF1
2754-50_2	Complement C3	539	1.01	0.379	0.594	0.222	0.523	0.294	1.103	0.669	-0.434	none			SL000312	C3	P01024	718	C3
2949-6_2	Phospholipase A2, Group X	540	1.01	0.38	0.594	0.811	0.125	0.238	0.014	-0.056	-0.07	none			SL004067	GX	O15496	8399	PLA2G10
2973-15_2	CD36 ANTIGEN	541	1.01	0.38	0.594	0.404	0.499	0.258	-0.168	0.057	0.225	none			SL000668	CD36 ANTIGEN	P16671	948	CD36
2746-56_1	Thymic stromal lymphopoietin protein receptor	542	1.01	0.381	0.594	0.228	0.72	0.321	0.099	0.027	-0.073	none			SL005226	TSLP R	Q9HC73	64109	CRLF2
3520-58_1	Transforming growth factor beta-3	543	1.01	0.381	0.594	0.18	0.439	0.263	0.033	-0.116	-0.149	none			SL000089	TGF-b3	P10600	7043	TGFB3
2735-6_4	Noggin	544	1	0.383	0.594	0.679	0.0783	0.388	-0.025	-0.082	-0.056	none			SL004683	Noggin	Q13253	9241	NOG
3847-56_2	Ethylmalonic encephalopathy 1	545	1	0.383	0.594	0.694	0.362	0.221	0.013	-0.04	-0.054	none			SL011532	ETHE1	O95571	23474	ETHE1
2632-5_2	Interleukin-12 receptor beta1	546	1	0.384	0.594	0.435	0.232	0.442	0.015	0.027	0.012	none			SL004148	IL-12 Rb1	P42701	3594	IL12RB1
3628-3_4	MAPK kinase 2	547	1	0.384	0.594	0.15	0.432	0.701	-0.171	-0.129	0.042	none			SL010501	MP2K2	P36507	5605	MAP2K2
5475-10_3	Protein kinase C beta type (splice variant beta-II)	548	1	0.385	0.594	0.152	0.767	0.276	0.152	0.044	-0.107	none			SL000553	PKC-B-II	P05771	5579	PRKCB
3521-16_2	Thyroid Stimulating Hormone	549	1	0.385	0.594	0.203	0.778	0.353	0.471	0.097	-0.374	none			SL000589	TSH	P01215 P01222	1081 12372	CGA TSHB
5487-7_3	SLAM family member 7/CRACC	550	0.99	0.386	0.595	0.229	0.925	0.26	0.041	-0.004	-0.044	none			SL016928	SLAF7	Q9NQ25	57823	SLAMF7
3213-65_2	Nidogen	551	0.99	0.387	0.595	0.23	0.24	0.715	-0.146	-0.104	0.042	none			SL000640	Nidogen	P14543	4811	NID1
3366-51_2	Extracellular matrix protein-1	552	0.99	0.388	0.595	0.282	0.404	0.432	0.197	0.171	-0.027	none			SL006550	ECM1	Q16610	1893	ECM1
4276-10_2	Phosphatidylethanolamine-binding protein 1	553	0.99	0.388	0.595	0.862	0.369	0.272	0.021	-0.29	-0.311	none			SL005358	prostatic binding protein	P30086	5037	PEBP1
2753-2_2	Complement C1q	554	0.98	0.389	0.595	0.255	0.538	0.393	0.344	0.138	-0.205	none			SL000309	C1q	P02745 P02746 P02747	712 713 714	C1QA C1QB C1QC
4721-54_2	Trefoil factor 3	555	0.98	0.389	0.595	0.754	0.259	0.267	-0.018	0.066	0.084	none			SL006119	TFF3	Q07654	7033	TFF3
2826-53_2	Ectodysplasin-A, secreted form	556	0.98	0.392	0.597	0.33	0.81	0.282	0.07	-0.011	-0.081	none			SL004644	EDA	Q92838	1896	EDA
3412-7_1	Apoptosis regulator Bcl-2	557	0.98	0.392	0.597	0.328	0.879	0.239	0.101	-0.012	-0.114	none			SL000104	Bcl-2	P10415	596	BCL2
2644-11_2	Protein kinase C alpha	558	0.97	0.395	0.601	0.206	0.77	0.262	0.229	0.063	-0.166	none			SL000551	PKC-A	P17252	5578	PRKCA
3486-58_2	Acidic fibroblast growth factor/beta-endothelial cell growth factor	559	0.96	0.397	0.602	0.799	0.223	0.189	0.035	0.16	0.125	none			SL000299	b-ECGF	P05230	2246	FGF1
2630-12_2	Interleukin-1 Receptor accessory protein	560	0.96	0.398	0.602	0.413	0.208	0.551	-0.088	-0.141	-0.053	none			SL004588	IL-1 R AcP	Q9NPH3	3556	IL1RAP
2654-19_1	Tumor necrosis factor receptor superfamily member 1A	561	0.96	0.398	0.602	0.207	0.394	0.654	0.116	0.08	-0.037	none			SL001992	TNF sR-I	P19438	7132	TNFRSF1A
3666-17_4	Complement factor H-related 5	562	0.96	0.399	0.602	0.369	0.657	0.235	0.057	-0.028	-0.085	none			SL006830	complement factor H-related 5	Q9BXR6	81494	CFHR5
5095-21_3	Killer cell immunoglobulin-like receptor 2DL4	563	0.95	0.401	0.602	0.886	0.343	0.219	0.014	-0.131	-0.146	none			SL012698	KI2L4	Q99706	3805	KIR2DL4
5228-25_2	Kinesin family member 23	564	0.95	0.401	0.602	0.213	0.301	0.921	0.181	0.167	-0.014	none			SL006189	KIF23	Q02241	9493	KIF23
5094-62_3	Junctional adhesion molecule-like	565	0.95	0.402	0.602	0.198	0.443	0.585	0.053	0.032	-0.021	none			SL009202	JAML1	Q86YT9	120425	AMICA1
3728-52_2	Secretin	566	0.95	0.402	0.602	0.468	0.236	0.266	-0.327	0.167	0.494	none			SL000570	Secretin	P09683	6343	SCT
3707-12_2	Albumin	567	0.95	0.403	0.603	0.367	0.33	0.335	0.517	0.644	0.127	none			SL000254	Albumin	P02768	213	ALB
5244-12_3	Mitogen-activated protein kinase 9/JNK2	568	0.94	0.403	0.603	0.969	0.244	0.214	-0.003	0.088	0.091	none			SL004716	JNK2	P45984	5601	MAPK9
3853-56_1	Malate dehydrogenase, cytoplasmic	569	0.94	0.405	0.604	0.18	0.467	0.621	-0.302	-0.206	0.096	none			SL008102	MDHC	P40925	4190	MDH1
2603-61_2	T-lymphocyte activation antigen CD80	570	0.94	0.406	0.604	0.357	0.896	0.177	0.084	-0.01	-0.094	none			SL003738	B7	P33681	941	CD80
4133-54_2	Granzyme B	571	0.94	0.407	0.604	0.585	0.336	0.351	-0.03	-0.215	-0.185	none			SL004068	Granzyme B	P10144	3002	GZMB
5476-66_3	Protein kinase C gamma	572	0.93	0.408	0.605	0.416	0.349	0.294	-0.144	0.044	0.187	none			SL000556	PKC-G	P05129	5582	PRKCG
2737-22_2	Nephroblastoma Overexpressed gene homolog	573	0.93	0.409	0.605	0.901	0.183	0.311	-0.009	-0.096	-0.087	none			SL005236	NovH	P48745	4856	NOV
4831-4_2	L-Selectin	574	0.93	0.411	0.606	0.242	0.717	0.249	0.068	0.023	-0.045	none			SL002823	sL-Selectin	P14151	6402	SELL
3737-6_3	Cathepsin H	575	0.93	0.411	0.606	0.21	0.61	0.443	0.097	0.035	-0.062	none			SL000346	Cathepsin H	P09668	1512	CTSH
4480-59_2	Complement C3b	576	0.92	0.412	0.606	0.315	0.335	0.846	0.189	0.208	0.019	none			SL000314	C3b	P01024	718	C3
3040-59_1	Macrophage inflammatory protein 1-alpha/CCL3	577	0.92	0.413	0.607	0.764	0.38	0.246	-0.022	0.098	0.12	none			SL000519	MIP-1a	P10147	6348	CCL3
4917-62_1	Integrin alpha-V: beta-5 complex	578	0.92	0.414	0.607	0.812	0.251	0.26	-0.034	0.146	0.18	none			SL003182	Integrin aVb5	P06756 P18084	3685 3693	ITGAV ITGB5
4261-55_2	Paraoxonase 1	579	0.91	0.417	0.609	0.197	0.246	0.773	-0.087	-0.115	-0.029	none			SL005493	paraoxonase 1	P27169	5444	PON1
5317-3_3	CD70	580	0.91	0.418	0.609	0.157	0.326	0.796	0.081	0.062	-0.019	none			SL007195	CD70	P32970	970	CD70
3641-49_4	Retinol-binding protein 4	581	0.91	0.418	0.609	0.678	0.166	0.37	0.019	0.057	0.038	none			SL000566	RBP	P02753	5950	RBP4
4786-58_3	UMP-CMP kinase	582	0.91	0.418	0.609	0.176	0.748	0.419	0.096	0.024	-0.072	none			SL007871	Cytidylate kinase	P30085	51727	CMPK1
4959-2_1	Anterior gradient protein 2 homolog	583	0.9	0.419	0.609	0.265	0.668	0.181	0.072	0.03	-0.042	none			SL004925	AGR2	O95994	10551	AGR2
2623-54_4	Protein E7 (Human Papillomavirus Type 16)	584	0.9	0.419	0.609	0.198	0.46	0.6	-0.099	-0.06	0.039	none			SL004697	HPV E7 Type 16	P03129	1489079	Human-virus
2837-3_2	Hepatocyte growth factor receptor/c-Met	585	0.9	0.422	0.612	0.819	0.0471	0.36	0.019	0.093	0.074	none			SL000134	Met	P08581	4233	MET
3177-49_2	Carbonic anhydrase IV	586	0.89	0.424	0.613	0.305	0.168	0.904	-0.057	-0.063	-0.007	none			SL010369	Carbonic Anhydrase IV	P22748	762	CA4
3839-60_2	AH receptor-interacting protein	587	0.89	0.425	0.613	0.389	0.662	0.239	0.121	-0.067	-0.187	none			SL011629	AIP	O00170	9049	AIP
3633-70_1	Nidogen-2	588	0.89	0.425	0.613	0.501	0.507	0.232	-0.056	0.041	0.097	none			SL008193	NID2	Q14112	22795	NID2
4144-13_1	Monocyte chemoattractant protein 4	589	0.89	0.425	0.613	0.433	0.167	0.569	-0.052	-0.098	-0.046	none			SL000517	MCP-4	Q99616	6357	CCL13
5091-28_3	Leukocyte immunoglobulin-like receptor subfamily B member 2	590	0.88	0.428	0.613	0.367	0.2	0.631	0.038	0.061	0.024	none			SL005191	ILT-4	Q8N423	10288	LILRB2
5242-37_3	MAPK kinase 4	591	0.88	0.428	0.613	0.225	0.721	0.379	0.12	0.036	-0.084	none			SL007237	MP2K4	P45985	6416	MAP2K4
3151-6_1	Interleukin-2 receptor alpha chain	592	0.88	0.43	0.613	0.425	0.635	0.25	0.053	-0.027	-0.08	none			SL003305	IL-2 sRa	P01589	3559	IL2RA
3362-61_2	Chordin-Like 1	593	0.87	0.431	0.613	0.28	0.166	0.919	-0.237	-0.262	-0.025	none			SL009400	CRDL1	Q9BU40	91851	CHRDL1
4476-22_2	ZAP70/70 kDa zeta-associated protein kinase	594	0.87	0.431	0.613	0.836	0.0327	0.365	-0.018	-0.096	-0.078	none			SL010519	ZAP70	P43403	7535	ZAP70
5312-49_3	Apolipoprotein E (isoform E2)	595	0.87	0.431	0.613	0.292	0.496	0.096	0.392	0.282	-0.111	none			SL000277	Apo E2	P02649	348	APOE
4159-130_1	Complement factor H	596	0.87	0.431	0.613	0.373	0.358	0.422	0.397	0.458	0.061	none			SL000415	Factor H	P08603	3075	CFH
3864-5_2	Ribosomal protein S7	597	0.87	0.432	0.613	0.835	0.3	0.291	0.012	-0.066	-0.077	none			SL011528	RS7	P62081	6201	RPS7
3634-5_4	Opioid-binding cell adhesion molecule	598	0.87	0.432	0.613	0.75	0.328	0.25	0.012	-0.035	-0.047	none			SL005491	OBCAM	Q14982	4978	OPCML
3313-21_2	Ficolin-2	599	0.87	0.434	0.614	0.328	0.826	0.249	0.027	-0.006	-0.033	none			SL006542	FCN2	Q15485	2220	FCN2
5028-59_1	Scavenger receptor cysteine-rich type 1 protein M130 chain/Soluble CD163	600	0.86	0.435	0.615	0.105	0.541	0.285	0.039	-0.069	-0.108	none			SL005764	sCD163	Q86VB7	9332	CD163
3893-64_1	Mesothelin	601	0.86	0.436	0.616	0.292	0.933	0.228	0.121	-0.011	-0.132	none			SL001905	Mesothelin	Q13421	10232	MSLN
3583-54_1	Arylsulfatase A	602	0.86	0.437	0.616	0.308	0.171	0.78	-0.07	-0.094	-0.023	none			SL005392	Arylsulfatase A	P15289	410	ARSA
4139-71_2	Interleukin-6 receptor alpha chain	603	0.86	0.438	0.617	0.387	0.809	0.185	-0.046	0.013	0.059	none			SL001943	IL-6 sRa	P08887	3570	IL6R
4961-17_1	Annexin A2	604	0.85	0.44	0.617	0.644	0.241	0.385	0.079	0.238	0.158	none			SL004209	annexin II	P07355	302	ANXA2
4673-13_2	Interleukin-6	605	0.85	0.441	0.617	0.274	0.311	0.898	-0.132	-0.119	0.013	none			SL000087	IL-6	P05231	3569	IL6
4594-22_2	Pituitary adenylate cyclase-activating polypeptide 38	606	0.84	0.443	0.617	0.36	0.384	0.652	0.193	0.207	0.014	none			SL011498	PACAP-38	P18509	116	ADCYAP1
3367-8_3	Fetuin B	607	0.84	0.443	0.617	0.503	0.216	0.498	0.071	0.122	0.052	none			SL006777	FETUB	Q9UGM5	26998	FETUB
2841-13_2	Frizzled-related protein 3, secreted	608	0.84	0.443	0.617	0.551	0.136	0.514	-0.033	-0.072	-0.039	none			SL004650	sFRP-3	Q92765	2487	FRZB
3168-8_2	ADAM metallopeptidase with thrombospondin motifs 5/Aggrecanase 2	609	0.84	0.445	0.617	0.216	0.863	0.386	0.036	0.005	-0.031	none			SL004626	ADAMTS-5	Q9UNA0	11096	ADAMTS5
2982-82_2	Galectin-4	610	0.84	0.445	0.617	0.35	0.921	0.278	0.093	-0.008	-0.101	none			SL005165	Galectin-4	P56470	3960	LGALS4
3443-61_2	Homeodomain-interacting protein kinase 3	611	0.84	0.446	0.617	0.301	0.448	0.613	0.244	0.199	-0.045	none			SL010523	HIPK3	Q9H422	10114	HIPK3
3473-78_2	Thrombopoietin Receptor	612	0.84	0.447	0.617	0.577	0.242	0.391	-0.022	-0.049	-0.026	none			SL005224	Thrombopoietin Receptor	P40238	4352	MPL
2358-19_2	Vascular endothelial growth factor receptor 3	613	0.83	0.447	0.617	0.683	0.28	0.332	-0.027	-0.089	-0.062	none			SL003322	VEGF sR3	P35916	2324	FLT4
4449-67_3	Gremlin-1	614	0.83	0.448	0.617	0.177	0.528	0.574	-0.071	-0.035	0.036	none			SL007024	GREM1	O60565	26585	GREM1
5225-50_3	Casein kinase II alpha1:beta heterodimer	615	0.83	0.449	0.617	0.353	0.266	0.682	0.348	0.5	0.152	none			SL016550	CK2-A1:B	P68400 P67870	1457 1460	CSNK2A1 CSNK2B
3624-3_4	Marapsin	616	0.83	0.449	0.617	0.155	0.621	0.521	0.078	0.033	-0.045	none			SL011069	Marapsin	Q9BQR3	83886	PRSS27
2842-68_1	Intercellular adhesion molecule 2	617	0.83	0.449	0.617	0.333	0.265	0.958	-0.042	-0.044	-0.002	none			SL003177	sICAM-2	P13598	3384	ICAM2
2649-77_2	Intercellular adhesion molecule 3	618	0.83	0.45	0.617	0.645	0.427	0.209	0.03	-0.045	-0.075	none			SL003178	sICAM-3	P32942	3385	ICAM3
3321-2_2	Interleukin-24	619	0.82	0.451	0.617	0.265	0.32	0.992	-0.107	-0.108	-0.001	none			SL007385	IL24	Q13007	11009	IL24
2602-2_2	Angiopoietin-2	620	0.82	0.452	0.617	0.61	0.456	0.248	-0.078	0.123	0.201	none			SL001996	Angiopoietin-2	O15123	285	ANGPT2
5204-13_3	Proteasome activator complex subunit 3	621	0.82	0.452	0.617	0.38	0.369	0.623	0.129	0.148	0.018	none			SL005308	PSME3	P61289	10197	PSME3
3072-4_2	Interleukin-13	622	0.82	0.454	0.618	0.564	0.618	0.0856	0.045	-0.041	-0.086	none			SL001718	IL-13	P35225	3596	IL13
3344-60_4	Antithrombin III	623	0.82	0.454	0.618	0.426	0.194	0.644	0.074	0.117	0.043	none			SL000272	Antithrombin III	P01008	462	SERPINC1
3312-64_1	High affinity Immunoglobulin G Fc receptor I	624	0.81	0.458	0.622	0.407	0.742	0.285	-0.053	0.016	0.069	none			SL010461	FCGR1	P12314	2209	FCGR1A
4718-5_2	Cyclophilin B	625	0.81	0.458	0.622	0.233	0.673	0.404	0.082	0.033	-0.049	none			SL007869	PPIB	P23284	5479	PPIB
3820-68_2	MAPK-activated protein kinase 2	626	0.81	0.459	0.622	0.329	0.461	0.00812	0.562	0.477	-0.085	none			SL010503	MAPK2	P49137	9261	MAPKAPK2
3305-6_1	Drosophila Delta homolog 4	627	0.8	0.462	0.624	0.277	0.433	0.657	0.055	0.038	-0.017	none			SL010457	DLL4	Q9NR61	54567	DLL4
5015-15_1	Platelet-activating factor acetylhydrolase/LDL-associated phospholipase A2	628	0.8	0.462	0.624	0.235	0.896	0.337	0.055	0.007	-0.048	none			SL003440	PAFAH	Q13093	7941	PLA2G7
2957-21_2	Histone H3-K9 methyltransferase 3	629	0.8	0.463	0.625	0.262	0.391	0.996	-0.106	-0.106	0	none			SL003542	NG36	Q96KQ7	10919	EHMT2
5358-3_3	Osteomodulin/ Osteoadherin	630	0.79	0.466	0.626	0.415	0.234	0.644	-0.098	-0.154	-0.056	none			SL008574	OMD	Q99983	4958	OMD
5339-49_3	S100A9/calgranulin B	631	0.79	0.467	0.626	0.32	0.278	0.628	-0.049	-0.084	-0.035	none			SL004477	calgranulin B	P06702	6280	S100A9
4552-13_2	Heparan-sulfate 6-O-sulfotransferase 1	632	0.79	0.467	0.626	0.685	0.466	0.21	-0.02	0.041	0.062	none			SL014129	H6ST1	O60243	9394	HS6ST1
3627-71_4	Neprilysin-2	633	0.78	0.469	0.628	0.309	0.869	0.299	0.06	-0.011	-0.071	none			SL010376	MMEL2	Q495T6	79258	MMEL1
4963-19_1	cAMP-regulated phosphoprotein 19	634	0.78	0.472	0.629	0.348	0.385	0.987	0.143	0.144	0.001	none			SL011708	ARP19	P56211	10776	ARPP19
4929-55_1	Sex hormone-binding globulin	635	0.77	0.473	0.629	0.454	0.338	0.44	0.083	0.119	0.036	none			SL005102	SHBG	P04278	6462	SHBG
3722-49_2	Tumor necrosis factor ligand superfamily member 2/TNF-alpha	636	0.77	0.474	0.629	0.247	0.264	0.852	-0.049	-0.04	0.009	none			SL002517	TNF-a	P01375	7124	TNF
2638-12_2	Macrophage colony-stimulating factor 1 receptor	637	0.77	0.474	0.629	0.798	0.273	0.267	0.021	0.088	0.068	none			SL004153	M-CSF R	P07333	1436	CSF1R
2790-54_2	Neutrophil-activating peptide 2	638	0.77	0.476	0.629	0.328	0.498	0.161	0.307	0.238	-0.069	none			SL003191	NAP-2	P02775	5473	PPBP
3000-66_1	Mannose-binding protein C	639	0.77	0.476	0.629	0.36	0.94	0.248	0.088	-0.007	-0.095	none			SL004516	MBL	P11226	4153	MBL2
3736-60_3	Bone morphogenetic protein-6	640	0.76	0.477	0.629	0.262	0.585	0.507	0.113	0.051	-0.062	none			SL003993	BMP-6	P22004	654	BMP6
5006-71_1	MAPK 13	641	0.76	0.477	0.629	0.418	0.32	0.553	0.041	0.071	0.03	none			SL006993	MK13	O15264	5603	MAPK13
5226-36_3	Casein kinase II alpha2:beta heterodimer	642	0.76	0.479	0.629	0.595	0.235	0.461	0.139	0.321	0.182	none			SL016551	CK2-A2:B	P19784 P67870	1459 1460	CSNK2A2 CSNK2B
3026-5_2	Calpastatin	643	0.76	0.479	0.629	0.755	0.41	0.31	-0.04	0.154	0.194	none			SL000338	Calpastatin	P20810	831	CAST
4304-18_2	Transcription factor MLR1	644	0.76	0.48	0.629	0.962	0.372	0.263	0.002	0.059	0.057	none			SL006698	transcription factor MLR1, isoform CRA_b	Q8N3X6	254251	LCORL
2747-3_2	UL16 binding protein 3	645	0.76	0.48	0.629	0.281	0.752	0.406	0.208	0.056	-0.152	none			SL005229	ULBP-3	Q9BZM4	79465	ULBP3
5265-12_3	GRAP2/GRB2-related adaptor protein 2	646	0.76	0.48	0.629	0.213	0.584	0.553	0.076	0.034	-0.043	none			SL005725	GRB2-related adapter protein 2	O75791	9402	GRAP2
4561-65_2	Livin/baculoviral IAP repeat containing 7	647	0.76	0.481	0.629	0.338	0.31	0.668	0.062	0.095	0.033	none			SL004299	Livin B	Q96CA5	79444	BIRC7
2811-27_1	Angiopoietin-1	648	0.75	0.484	0.629	0.286	0.248	0.949	-0.1	-0.107	-0.007	none			SL001995	Angiopoietin-1	Q15389	284	ANGPT1
2796-62_2	Fibrinogen	649	0.75	0.485	0.629	0.395	0.39	0.737	0.693	0.773	0.081	none			SL000424	Fibrinogen	P02671 P02675 P02679	2243 2244 2266	FGA FGB FGG
3877-67_2	Calcium-calmodulin-dependent protein kinase kinase 1, alpha	650	0.74	0.487	0.629	0.418	0.221	0.656	-0.153	-0.254	-0.101	none			SL004938	CaMKK alpha	Q8N5S9	84254	CAMKK1
4254-6_2	NudC domain-containing protein 3	651	0.74	0.487	0.629	0.737	0.316	0.378	-0.043	-0.179	-0.136	none			SL011768	NUDC3	Q8IVD9	23386	NUDCD3
5108-72_3	Notch 3	652	0.74	0.487	0.629	0.364	0.402	0.992	0.103	0.103	-0.001	none			SL005209	Notch-3	Q9UM47	4854	NOTCH3
4874-3_1	Angiogenin	653	0.74	0.487	0.629	0.546	0.241	0.509	0.065	0.122	0.057	none			SL000003	Angiogenin	P03950	283	ANG
5112-73_3	CD200/OX-2 membrane glycoprotein	654	0.74	0.488	0.629	0.314	0.89	0.382	0.062	0.007	-0.055	none			SL014268	OX2G	P41217	4345	CD200
2685-21_2	Insulin-like growth factor-binding protein 5	655	0.74	0.49	0.629	0.278	0.69	0.452	0.101	0.034	-0.067	none			SL004676	IGFBP-5	P24593	3488	IGFBP5
5280-68_5	Mitochondrial glutamate carrier 2	656	0.74	0.49	0.629	0.264	0.383	0.756	0.048	0.035	-0.013	none			SL016563	GHC2	Q9H1K4	83733	SLC25A18
3479-71_2	Trypsin-3	657	0.74	0.49	0.629	0.413	0.878	0.116	0.04	-0.008	-0.048	none			SL006480	TRY3	P35030	5646	PRSS3
5099-14_3	Lymphocyte-activation gene 3/LAG-3	658	0.73	0.491	0.629	0.176	0.59	0.592	0.08	0.044	-0.037	none			SL005195	LAG-3	P18627	3902	LAG3
5023-23_1	PUR8/Adenylosuccinate lyase	659	0.73	0.491	0.629	0.324	0.553	0.127	0.143	0.097	-0.045	none			SL009792	PUR8	P30566	158	ADSL
3214-3_2	Neuropilin-1	660	0.73	0.492	0.629	0.403	0.866	0.268	-0.1	0.018	0.118	none			SL006397	NRP1	O14786	8829	NRP1
3605-77_4	Mannan-binding lectin serine peptidase 1	661	0.73	0.492	0.629	0.2	0.493	0.702	0.046	0.03	-0.015	none			SL011049	MASP3	P48740	5648	MASP1
3315-15_1	Glypican-2	662	0.73	0.492	0.629	0.463	0.333	0.538	0.083	0.122	0.039	none			SL010463	GPC2	Q8N158	221914	GPC2
3293-2_4	CD5 antigen-like	663	0.73	0.493	0.629	0.3	0.582	0.319	0.292	0.183	-0.108	none			SL006108	CD5L	O43866	922	CD5L
2888-49_2	Complement C7	664	0.73	0.493	0.629	0.275	0.842	0.326	-0.123	-0.026	0.097	none			SL000323	C7	P10643	730	C7
3364-76_2	Cathepsin V	665	0.73	0.494	0.629	0.22	0.494	0.345	0.112	-0.494	-0.605	none			SL006910	Cathepsin V	O60911	1515	CTSL2
5201-50_4	High affinity cAMP-specific phosphodiesterase 9A/PDE9A	666	0.72	0.496	0.63	0.428	0.327	0.694	0.027	0.035	0.008	none			SL016554	PDE9A	O76083	5152	PDE9A
4324-33_2	Cystatin SA	667	0.72	0.497	0.63	0.729	0.34	0.284	-0.037	0.077	0.115	none			SL008516	CYTT	P09228	1470	CST2
5264-65_3	Calreticulin	668	0.72	0.499	0.63	0.271	0.814	0.43	0.102	0.021	-0.081	none			SL003520	calreticulin	P27797	811	CALR
3480-7_1	Vaccinia Virus VH1-related Phosphatase/Dual specificity protein phosphatase 3	669	0.71	0.5	0.63	0.571	0.609	0.189	-0.052	0.066	0.119	none			SL008122	DUS3	P51452	1845	DUSP3
2913-1_2	Myeloid progenitor inhibitory factor 1/CCL23	670	0.71	0.5	0.63	0.506	0.574	0.31	0.027	-0.02	-0.047	none			SL003302	MPIF-1	P55773	6368	CCL23
3681-87_3	Kallikrein 14	671	0.71	0.5	0.63	0.836	0.335	0.316	0.01	-0.047	-0.057	none			SL003919	kallikrein 14	Q9P0G3	43847	KLK14
3378-49_2	Kallikrein 7	672	0.71	0.501	0.63	0.583	0.362	0.44	0.095	0.369	0.274	none			SL000064	Kallikrein 7	P49862	5650	KLK7
2418-55_9	Apolipoprotein E	673	0.71	0.501	0.63	0.571	0.503	0.277	0.057	-0.045	-0.102	none			SL000276	Apo E	P02649	348	APOE
5005-4_1	MAPK 12	674	0.71	0.501	0.63	0.184	0.338	0.933	-0.145	-0.158	-0.014	none			SL007281	MK12	P53778	6300	MAPK12
3331-8_1	RGM domain family member B	675	0.71	0.501	0.63	0.29	0.899	0.402	0.035	0.004	-0.031	none			SL010468	RGMB	Q6NW40	285704	RGMB
4150-75_2	Plasmin	676	0.71	0.504	0.631	0.431	0.326	0.556	-0.021	-0.042	-0.021	none			SL000540	Plasmin	P00747	5340	PLG
3198-4_1	Iduronate 2-sulfatase	677	0.71	0.504	0.631	0.901	0.196	0.353	0.011	-0.084	-0.096	none			SL008639	IDS	P22304	3423	IDS
4785-30_3	Corticosteroid binding globulin	678	0.7	0.505	0.631	0.381	0.968	0.31	0.09	-0.004	-0.094	none			SL000347	CBG	P08185	866	SERPINA6
2247-20_11	Endocrine-gland-derived vascular endothelial growth factor	679	0.7	0.505	0.631	0.234	0.679	0.483	0.043	0.018	-0.025	none			SL004332	EG-VEGF	P58294	84432	PROK1
2692-74_2	Phospholipase A2, Group IIA	680	0.7	0.505	0.631	0.28	0.432	0.624	0.056	0.029	-0.027	none			SL002528	NPS-PLA2	P14555	5320	PLA2G2A
5084-154_3	interleukin-17 receptor B	681	0.7	0.506	0.631	0.351	0.331	0.897	0.083	0.093	0.01	none			SL005174	IL-17B R	Q9NRM6	55540	IL17RB
4567-82_2	Signaling lymphocyte activation molecule/CDw150	682	0.7	0.507	0.631	0.324	0.459	0.735	0.065	0.051	-0.014	none			SL014468	SH21A	O60880	4068	SH2D1A
3381-24_2	Lyn kinase, isoform B	683	0.7	0.509	0.631	0.268	0.472	0.71	0.396	0.274	-0.123	none			SL010500	LYNB	P07948	4067	LYN
4156-74_1	Transforming growth factor beta-2	684	0.69	0.51	0.631	0.324	0.315	0.952	-0.062	-0.065	-0.004	none			SL000088	TGF-b2	P61812	7042	TGFB2
3352-80_3	Carbonic anhydrase VI	685	0.69	0.51	0.631	0.574	0.164	0.57	0.041	0.084	0.043	none			SL010288	Carbonic anhydrase 6	P23280	765	CA6
3807-1_2	Fibroblast growth factor 23	686	0.69	0.511	0.631	0.136	0.58	0.655	0.06	0.035	-0.025	none			SL007651	FGF23	Q9GZV9	8074	FGF23
4842-62_2	Glypican 3	687	0.69	0.513	0.632	0.774	0.371	0.313	-0.065	0.19	0.255	none			SL000070	Glypican 3	P51654	2719	GPC3
3180-46_2	Cathepsin D	688	0.69	0.513	0.632	0.315	0.592	0.515	0.261	0.098	-0.164	none			SL000344	Cathepsin D	P07339	1509	CTSD
4151-6_2	Plasminogen	689	0.69	0.513	0.632	0.38	0.461	0.791	0.289	0.273	-0.015	none			SL000541	Plasminogen	P00747	5340	PLG
5138-50_3	TWEAK receptor/TNFRSF12A	690	0.68	0.515	0.632	0.567	0.653	0.165	0.083	-0.075	-0.158	none			SL004366	TWEAKR	Q9NP84	51330	TNFRSF12A
3060-43_2	Complement C9	691	0.68	0.515	0.632	0.396	0.418	0.851	0.574	0.622	0.048	none			SL000325	C9	P02748	735	C9
3714-49_2	Creatine kinase-MB	692	0.68	0.515	0.632	0.242	0.445	0.75	0.283	0.198	-0.085	none			SL000382	CK-MB	P12277 P06732	1152 1158	CKB CKM
2475-1_3	Stem cell factor receptor/CD117/c-Kit	693	0.68	0.518	0.634	0.334	0.327	0.605	0.08	0.039	-0.041	none			SL004010	SCF sR	P10721	3815	KIT
4140-3_2	Interleukin-7	694	0.68	0.518	0.634	0.234	0.414	0.927	-0.099	-0.091	0.009	none			SL000483	IL-7	P13232	3574	IL7
3070-1_2	Interleukin-2	695	0.67	0.519	0.634	0.955	0.416	0.285	-0.006	0.117	0.122	none			SL000478	IL-2	P60568	3558	IL2
5009-11_1	Moesin	696	0.67	0.52	0.634	0.287	0.48	0.722	0.328	0.235	-0.094	none			SL005846	Moesin	P26038	4478	MSN
3391-10_2	Phosphatidylinositol-4,5-bisphosphate 3-kinase catalytic subunit gamma isoform	697	0.67	0.523	0.637	0.822	0.192	0.417	-0.014	-0.067	-0.053	none			SL007250	PK3CG	P48736	5294	PIK3CG
4165-2_1	Thyroglobulin	698	0.66	0.525	0.638	0.654	0.53	0.254	-0.025	0.036	0.061	none			SL000587	Thyroglobulin	P01266	7038	TG
4157-2_1	Thrombin	699	0.66	0.526	0.638	0.307	0.722	0.475	-0.212	-0.064	0.148	none			SL000586	Thrombin	P00734	2147	F2
2871-73_2	DNA repair protein RAD51 homolog 1	700	0.66	0.527	0.639	0.736	0.204	0.332	0.057	-0.107	-0.164	none			SL006922	RAD51	Q06609	5888	RAD51
2526-53_3	Osteoprotegerin/TNFRSF11B	701	0.65	0.529	0.64	0.651	0.161	0.336	0.062	-0.067	-0.128	none			SL002539	OPG	O00300	4982	TNFRSF11B
2849-49_1	Allograft inflammatory factor 1	702	0.65	0.53	0.64	0.597	0.439	0.313	0.051	-0.04	-0.091	none			SL004768	AIF1	P55008	199	AIF1
3186-2_2	Complement C2	703	0.65	0.531	0.64	0.317	0.352	0.819	-0.061	-0.077	-0.016	none			SL002525	C2	P06681	717	C2
2615-60_2	Ephrin-A5	704	0.65	0.532	0.64	0.342	0.22	0.896	-0.189	-0.163	0.026	none			SL004141	Ephrin-A5	P52803	1946	EFNA5
4306-4_2	Transketolase	705	0.65	0.532	0.64	0.247	0.52	0.765	-0.218	-0.167	0.051	none			SL003655	Transketolase	P29401	7086	TKT
2579-17_5	Matrix metalloproteinase 9/Gelatinase B	706	0.65	0.532	0.64	0.572	0.221	0.575	0.029	0.062	0.033	none			SL000527	MMP-9	P14780	4318	MMP9
4907-56_1	D-dimer	707	0.64	0.535	0.641	0.255	0.34	0.974	-0.283	-0.273	0.01	none			SL000022	D-dimer	P02671 P02675 P02679	2243 2244 2266	FGA FGB FGG
5254-69_3	cGMP-inhibited cAMP phosphodiesterase 3A/PDE3A	708	0.64	0.537	0.643	0.497	0.699	0.282	0.058	-0.035	-0.093	none			SL016553	PDE3A	Q14432	5139	PDE3A
3450-4_2	Kallikrein 6	709	0.63	0.54	0.645	0.534	0.35	0.523	-0.063	-0.133	-0.07	none			SL001797	Kallikrein 6	Q92876	5653	KLK6
4472-5_2	Tropomyosin beta chain	710	0.63	0.541	0.645	0.64	0.228	0.533	0.036	0.091	0.055	none			SL004908	Tropomyosin 2	P07951	7169	TPM2
3361-26_2	Langerin	711	0.63	0.541	0.645	0.265	0.804	0.461	-0.056	-0.014	0.041	none			SL010610	CLC4K	Q9UJ71	50489	CD207
2762-30_2	Fibroblast growth factor 19	712	0.63	0.542	0.645	0.316	0.645	0.382	0.075	0.042	-0.033	none			SL004337	FGF-19	O95750	9965	FGF19
5088-175_3	Interleukin-23 receptor	713	0.63	0.542	0.645	0.29	0.71	0.491	0.235	0.087	-0.148	none			SL005185	IL-23 R	Q5VWK5	149233	IL23R
3723-1_2	Brain natriuretic peptide 32	714	0.63	0.544	0.646	0.899	0.353	0.383	-0.005	-0.045	-0.04	none			SL000306	BNP-32	P16860	4879	NPPB
2585-2_5	Prolactin	715	0.62	0.545	0.646	0.194	0.581	0.662	0.053	0.029	-0.024	none			SL000546	PRL	P01236	5617	PRL
3332-57_1	Hemojuvelin	716	0.62	0.545	0.646	0.801	0.47	0.277	-0.024	0.08	0.103	none			SL010469	RGM-C	Q6ZVN8	148738	HFE2
5035-7_1	Thymidylate synthase	717	0.62	0.549	0.649	0.556	0.604	0.306	0.096	-0.14	-0.236	none			SL000142	TS	P04818	7298	TYMS
3828-54_2	Platelet-derived growth factor C chain homodimer	718	0.61	0.55	0.65	0.558	0.283	0.582	0.021	0.038	0.017	none			SL011071	PDGF-CC	Q9NRA1	56034	PDGFC
4301-58_2	Thymidine kinase, cytosolic	719	0.61	0.552	0.65	0.824	0.469	0.325	0.012	-0.056	-0.068	none			SL000057	Thymidine kinase	P04183	7083	TK1
5114-65_3	Prolactin receptor	720	0.61	0.552	0.65	0.319	0.709	0.515	0.032	0.01	-0.022	none			SL005212	Prolactin Receptor	P16471	5618	PRLR
4541-49_2	Cell adhesion molecule-related down-regulated by oncogenes	721	0.61	0.553	0.65	0.574	0.311	0.546	-0.032	-0.064	-0.032	none			SL014092	CDON	Q4KMG0	50937	CDON
3303-23_2	Cystatin M	722	0.6	0.556	0.652	0.875	0.445	0.403	-0.013	-0.153	-0.14	none			SL004438	Cystatin M	Q15828	1474	CST6
3210-1_2	Methionine aminopeptidase 1	723	0.6	0.557	0.652	0.289	0.649	0.551	0.287	0.141	-0.146	none			SL010374	METAP1	P53582	23173	METAP1
3700-15_4	Immunoglobulin G	724	0.6	0.557	0.652	0.501	0.254	0.674	-0.154	-0.255	-0.102	none			SL000467	IgG	P01857	3500 3501 3502 3503 50802 3535	IGHG1 IGHG2 IGHG3 IGHG4 IGK@ IGL@
4547-59_2	Fibronectin leucine rich transmembrane 1	725	0.6	0.557	0.652	0.513	0.732	0.273	0.103	-0.056	-0.16	none			SL014071	FLRT1	Q9NZU1	23769	FLRT1
2436-49_4	Scavenger receptor for phosphatidylserine and oxidized low density lipoprotein/CXCL16	726	0.6	0.559	0.653	0.402	0.999	0.385	0.044	0	-0.044	none			SL004016	CXCL16, soluble	Q9H2A7	58191	CXCL16
4851-25_1	Interleukin-1alpha	727	0.59	0.561	0.654	0.284	0.799	0.479	-0.1	-0.027	0.074	none			SL000125	IL-1a	P01583	3552	IL1A
4122-12_2	Discoidin domain receptor 1	728	0.59	0.561	0.654	0.752	0.537	0.186	0.021	-0.043	-0.064	none			SL004119	discoidin domain receptor 1	Q08345	780	DDR1
3007-7_2	Siglec-9	729	0.59	0.562	0.654	0.368	0.542	0.614	0.061	0.041	-0.019	none			SL005219	Siglec-9	Q9Y336	27180	SIGLEC9
3617-80_4	Hepatocyte growth factor activator	730	0.59	0.563	0.654	0.444	0.28	0.81	0.071	0.092	0.021	none			SL006512	HGFA	Q04756	3083	HGFAC
5404-53_3	Death receptor 6(DR6)/TNFRSF21	731	0.59	0.564	0.654	0.662	0.399	0.469	0.014	0.05	0.036	none			SL004871	DR6	O75509	27242	TNFRSF21
4464-10_2	Sialoadhesin	732	0.59	0.565	0.654	0.87	0.402	0.398	0.011	0.082	0.072	none			SL001753	Sialoadhesin	Q9BZZ2	6614	SIGLEC1
3640-14_3	alpha-2-macroglobulin receptor-associated protein	733	0.59	0.565	0.654	0.427	0.861	0.356	0.077	-0.017	-0.094	none			SL005263	RAP	P30533	4043	LRPAP1
5087-5_3	Interleukin-22 receptor subunit alpha2	734	0.58	0.566	0.654	0.405	0.327	0.521	-0.605	-0.135	0.47	none			SL005183	IL-22BP	Q969J5	116379	IL22RA2
4148-49_2	Pregnancy-associated plasma protein-A	735	0.58	0.568	0.655	0.634	0.243	0.555	-0.042	-0.091	-0.049	none			SL002755	PAPP-A	Q13219	5069	PAPPA
3379-29_1	Protein kinase C iota	736	0.58	0.569	0.655	0.262	0.495	0.928	-0.243	-0.223	0.02	none			SL007228	KPCI	P41743	5584	PRKCI
3217-74_2	Protease nexin I	737	0.58	0.57	0.655	0.488	0.768	0.332	0.044	-0.018	-0.062	none			SL004457	Protease nexin I	P07093	5270	SERPINE2
3316-58_1	Heparin cofactor II	738	0.58	0.571	0.655	0.883	0.348	0.384	0.011	0.074	0.064	none			SL004466	Heparin cofactor II	P05546	3053	SERPIND1
3052-8_2	Fas ligand	739	0.57	0.571	0.655	0.384	0.908	0.397	-0.046	-0.006	0.041	none			SL000633	Fas ligand, soluble	P48023	356	FASLG
4330-4_2	PSA	740	0.57	0.571	0.655	0.565	0.318	0.576	-0.07	-0.169	-0.099	none			SL000062	PSA	P07288	354	KLK3
3730-81_2	Tumor necrosis factor receptor superfamily member 4	741	0.57	0.572	0.655	0.35	0.647	0.524	0.186	0.088	-0.098	none			SL011448	TNR4	P43489	7293	TNFRSF4
4130-71_1	Fibroblast growth factor 6	742	0.57	0.574	0.656	0.309	0.563	0.673	0.134	0.084	-0.05	none			SL004340	FGF-6	P10767	2251	FGF6
3514-49_2	Proteinase-3	743	0.56	0.577	0.659	0.63	0.656	0.207	0.02	-0.021	-0.041	none			SL004008	Proteinase-3	P24158	5657	PRTN3
3329-14_2	Peptidoglycan recognition protein, short	744	0.56	0.578	0.659	0.927	0.329	0.365	0.008	0.077	0.069	none			SL004515	PGRP-S	O75594	8993	PGLYRP1
2631-50_2	Interleukin-10 receptor beta	745	0.56	0.579	0.659	0.392	0.938	0.36	0.038	-0.004	-0.042	none			SL004147	IL-10 Rb	Q08334	3588	IL10RB
3115-64_2	MAPK 1	746	0.56	0.581	0.66	0.331	0.737	0.507	0.34	0.117	-0.223	none			SL006918	MK01	P28482	5594	MAPK1
4696-2_2	Fatty acid binding protein, heart-type	747	0.55	0.583	0.662	0.467	0.338	0.654	-0.077	-0.144	-0.067	none			SL001774	FABP	P05413	2170	FABP3
3038-9_2	Interferon-gamma-inducible protein-9	748	0.55	0.587	0.663	0.302	0.434	0.945	0.102	0.094	-0.008	none			SL003326	I-TAC	O14625	6373	CXCL11
2666-53_2	Bone proteoglycan II	749	0.55	0.587	0.663	0.408	0.978	0.375	0.114	0.004	-0.11	none			SL004081	Bone proteoglycan II	P07585	1634	DCN
2761-49_2	Fibroblast growth factor 18	750	0.55	0.587	0.663	0.451	0.91	0.268	0.035	-0.006	-0.041	none			SL004336	FGF-18	O76093	8817	FGF18
4154-57_2	P-Selectin	751	0.54	0.588	0.663	0.404	0.465	0.963	0.089	0.086	-0.003	none			SL000560	P-Selectin	P16109	6403	SELP
4708-3_2	Estradiol 17-beta-dehydrogenase 1	752	0.54	0.589	0.663	0.392	0.308	0.923	0.03	0.033	0.004	none			SL004253	17-beta-HSD 1	P14061	3292	HSD17B1
3518-54_2	Thrombin-Activatable Fibrinolysis Inhibitor	753	0.54	0.589	0.663	0.467	0.475	0.689	0.18	0.201	0.02	none			SL004015	TAFI	Q96IY4	1361	CPB2
5110-84_3	Neurexin-1-beta	754	0.54	0.59	0.663	0.358	0.394	0.912	0.052	0.046	-0.006	none			SL009054	NRX1B	P58400	9378	NRXN1
3339-33_1	Thrombospondin-2	755	0.54	0.592	0.665	0.335	0.887	0.452	-0.101	-0.016	0.085	none			SL007206	TSP2	P35442	7058	THBS2
4499-21_1	Platelet-derived growth factor A chain homodimer	756	0.53	0.595	0.666	0.35	0.586	0.641	0.081	0.047	-0.034	none			SL000535	PDGF-AA	P04085	5154	PDGFA
3657-74_3	Calcineurin B alpha	757	0.53	0.596	0.666	0.449	0.84	0.396	0.047	-0.012	-0.059	none			SL004720	Calcineurin B a	P63098	5534	PPP3R1
3416-2_2	Tyrosine kinase Bruton	758	0.53	0.596	0.666	0.329	0.738	0.532	0.302	0.108	-0.195	none			SL010521	BTK	Q06187	695	BTK
3656-9_1	Cadherin-12	759	0.53	0.597	0.666	0.76	0.571	0.274	-0.019	0.049	0.068	none			SL004864	Cadherin-12	P55289	1010	CDH12
3601-54_3	Neural cell adhesion molecule L1-like protein	760	0.53	0.597	0.666	0.655	0.574	0.344	0.013	-0.017	-0.03	none			SL008936	CHL1	O00533	10752	CHL1
4413-3_2	Secretory leukocyte protease inhibitor	761	0.52	0.599	0.667	0.598	0.387	0.55	-0.032	-0.082	-0.05	none			SL001888	SLPI	P03973	6590	SLPI
3178-5_2	Cathepsin C	762	0.52	0.601	0.668	0.247	0.509	0.824	-0.046	-0.034	0.011	none			SL007280	CATC	P53634	1075	CTSC
5102-55_3	MICB/MHC class I polypeptide-related sequence B	763	0.52	0.602	0.668	0.265	0.966	0.444	0.075	0.004	-0.07	none			SL005200	MICB	Q29980	4277	MICB
2755-8_2	Complement C3a anaphylatoxin des Arginine	764	0.52	0.602	0.668	0.369	0.679	0.444	1.102	0.584	-0.518	none			SL003220	C3adesArg	P01024	718	C3
4990-87_1	Platelet Glycoprotein Ib alpha	765	0.52	0.602	0.668	0.892	0.24	0.463	-0.004	-0.029	-0.025	none			SL006460	GP1BA	P07359	2811	GP1BA
5129-12_3	Scavenger receptor class F member 1/SREC-I	766	0.52	0.604	0.669	0.493	0.137	0.816	0.027	0.037	0.01	none			SL005221	SREC-I	Q14162	8578	SCARF1
5080-131_3	Osteoactivin/GPNMB	767	0.51	0.606	0.67	0.711	0.37	0.534	-0.038	-0.144	-0.106	none			SL007429	GPNMB	Q14956	10457	GPNMB
2768-56_2	Hemopexin	768	0.51	0.609	0.67	0.41	0.596	0.45	0.084	0.061	-0.023	none			SL000440	Hemopexin	P02790	3263	HPX
3646-7_4	Tyrosine-protein kinase Tec	769	0.51	0.61	0.67	0.459	0.307	0.843	0.029	0.037	0.008	none			SL010518	TEC	P42680	7006	TEC
5070-76_3	Death decoy receptor 3 (DcR3)/TNFRSF6B	770	0.5	0.611	0.67	0.969	0.131	0.431	-0.002	0.044	0.047	none			SL003739	DcR3	O95407	8771	TNFRSF6B
3471-49_1	Serine-threonine-protein kinase 16	771	0.5	0.611	0.67	0.334	0.663	0.605	0.048	0.021	-0.027	none			SL010517	STK16	O75716	8576	STK16
3487-32_2	B lymphocyte chemoattractant/CXCL13	772	0.5	0.612	0.67	0.827	0.524	0.413	0.011	-0.063	-0.074	none			SL003167	BLC	O43927	10563	CXCL13
2751-16_2	Azurocidin	773	0.5	0.612	0.67	0.308	0.714	0.573	0.154	0.066	-0.088	none			SL004589	Azurocidin	P20160	566	AZU1
3876-15_2	Asialoglycoprotein receptor 1	774	0.5	0.613	0.67	0.454	0.35	0.899	0.025	0.029	0.004	none			SL008835	ASGR1	P07306	432	ASGR1
4979-34_2	Dermatopontin	775	0.5	0.613	0.67	0.782	0.5	0.39	-0.022	0.063	0.085	none			SL008178	DERM	Q07507	1805	DPT
5488-74_3	Proto-oncogene tyrosine-protein kinase Src	776	0.5	0.614	0.67	0.34	0.619	0.644	0.325	0.172	-0.153	none			SL010516	SRCN1	P12931	6714	SRC
2992-59_2	Interleukin-17 receptor A	777	0.5	0.614	0.67	0.471	0.717	0.356	0.024	-0.022	-0.046	none			SL004850	IL-17 sR	Q96F46	23765	IL17RA
4136-40_2	Interleukin-17D	778	0.5	0.615	0.67	0.407	0.907	0.475	-0.046	-0.005	0.04	none			SL004353	IL-17D	Q8TAD2	53342	IL17D
2514-65_3	Ephrin-B3	779	0.49	0.617	0.672	0.818	0.364	0.416	-0.015	-0.058	-0.043	none			SL004142	Ephrin-B3	Q15768	1949	EFNB3
2835-1_4	ATP-dependent DNA helicase II 70 kDa subunit	780	0.49	0.619	0.672	0.524	0.785	0.341	0.063	-0.029	-0.092	none			SL004301	Ku70	P12956	2547	XRCC6
5468-67_3	Interleukin-17 receptor C	781	0.49	0.62	0.672	0.517	0.756	0.448	-0.088	0.021	0.109	none			SL011068	IL-17 RC	Q8NAC3	84818	IL17RC
3191-50_2	G protein-coupled receptor associated sorting protein 2	782	0.49	0.621	0.672	0.745	0.319	0.495	-0.021	-0.058	-0.037	none			SL010392	WKFN1	Q96D09	114928	GPRASP2
3457-57_1	Osteoblast-specific transcription factor 2	783	0.49	0.622	0.672	0.755	0.51	0.422	-0.01	0.028	0.038	none			SL005084	Periostin	Q15063	10631	POSTN
2732-58_3	Homeobox transcription factor Nanog	784	0.48	0.622	0.672	0.429	0.37	0.966	-0.054	-0.051	0.003	none			SL005235	NANOG	Q9H9S0	79923	NANOG
3004-67_2	Programmed cell death 1 ligand 2	785	0.48	0.622	0.672	0.375	0.768	0.464	0.182	0.067	-0.115	none			SL004862	PD-L2	Q9BQ51	80380	PDCD1LG2
2967-8_1	Vascular cell adhesion protein 1/VCAM 1	786	0.48	0.624	0.672	0.999	0.228	0.453	0	-0.1	-0.1	none			SL001720	VCAM-1	P19320	7412	VCAM1
3175-51_5	ADAM metallopeptidase with thrombospondin motifs 13	787	0.48	0.625	0.672	0.44	0.468	0.967	0.074	0.077	0.003	none			SL006610	ATS13	Q76LX8	11093	ADAMTS13
3719-2_2	Cyclin-dependent kinase inhibitor p27	788	0.48	0.625	0.672	0.737	0.497	0.492	-0.05	-0.456	-0.406	none			SL000076	p27Kip1	P46527	1027	CDKN1B
2622-18_1	Heme oxygenase 2	789	0.48	0.625	0.672	0.522	0.429	0.674	-0.166	-0.246	-0.08	none			SL004751	HO-2	P30519	3163	HMOX2
3132-1_1	Vascular endothelial growth factor C	790	0.48	0.626	0.672	0.75	0.6	0.255	-0.02	0.036	0.056	none			SL004486	VEGF-C	P49767	7424	VEGFC
2441-2_4	Fibroblast growth factor 10/Keratinocyte growth factor 2	791	0.48	0.627	0.672	0.431	0.542	0.777	0.089	0.073	-0.016	none			SL004333	FGF-10	O15520	2255	FGF10
3591-51_3	Cadherin-6	792	0.47	0.629	0.672	0.528	0.318	0.768	0.052	0.074	0.022	none			SL004865	Cadherin-6	P55285	1004	CDH6
5260-80_3	tyrosine kinase 2	793	0.47	0.629	0.672	0.35	0.989	0.468	0.072	0.001	-0.071	none			SL007181	TYK2	P29597	7297	TYK2
3418-12_2	Calcium-calmodulin-dependent protein kinase ID	794	0.47	0.629	0.672	0.422	0.0831	0.721	-0.18	-0.1	0.08	none			SL010490	CAMK1D	Q8IU85	57118	CAMK1D
2697-7_2	Platelet factor 4	795	0.47	0.63	0.672	0.475	0.799	0.354	0.17	-0.086	-0.256	none			SL003041	PF-4	P02776	5196	PF4
4309-59_3	Triosephosphate isomerase	796	0.47	0.634	0.675	0.313	0.647	0.677	-0.235	-0.148	0.087	none			SL004812	Triosephosphate isomerase	P60174	7167	TPI1
2524-56_3	High-mobility group box 1/amphoterin	797	0.46	0.635	0.676	0.814	0.553	0.377	0.013	-0.047	-0.06	none			SL003280	HMG-1	P09429	3146	HMGB1
4407-10_1	Macrophage stimulatory protein	798	0.46	0.636	0.677	0.476	0.517	0.989	0.195	0.196	0.001	none			SL005202	MSP	P26927	4485	MST1
2686-67_2	Insulin-like growth factor-binding protein 6	799	0.46	0.638	0.677	0.479	0.832	0.383	0.021	-0.008	-0.028	none			SL005172	IGFBP-6	P24592	3489	IGFBP6
3091-70_2	Aurora kinase A	800	0.46	0.639	0.677	0.479	0.513	0.964	0.053	0.054	0.001	none			SL004771	Aurora kinase A	O14965	6790	AURKA
2865-77_2	Histone acetyltransferases monocytic leukemic zinc-finger protein	801	0.45	0.64	0.677	0.416	0.756	0.524	0.053	0.018	-0.035	none			SL004724	MOZ	Q92794	7994	KAT6A
4930-21_1	Stanniocalcin-1	802	0.45	0.641	0.677	0.948	0.39	0.389	-0.01	0.114	0.124	none			SL005789	Stanniocalcin-1	P52823	6781	STC1
4971-1_1	Cathepsin Z	803	0.45	0.641	0.677	0.321	0.94	0.455	0.039	-0.005	-0.043	none			SL008380	CATZ	Q9UBR2	1522	CTSZ
2431-17_3	Cathepsin G	804	0.45	0.642	0.677	0.399	0.71	0.576	0.047	0.018	-0.029	none			SL000345	Cathepsin G	P08311	1511	CTSG
5489-18_3	Stress-induced-phosphoprotein 1	805	0.45	0.643	0.677	0.507	0.43	0.72	0.19	0.286	0.096	none			SL010250	Stress-induced-phosphoprotein 1	P31948	10963	STIP1
3592-4_3	Calcium-calmodulin-dependent protein kinase I	806	0.45	0.643	0.677	0.47	0.434	0.839	0.08	0.1	0.02	none			SL010489	CAMK1	Q14012	8536	CAMK1
3852-19_2	Hsp40	807	0.45	0.644	0.677	0.346	0.62	0.697	0.187	0.11	-0.078	none			SL000449	HSP 40	P25685	3337	DNAJB1
4717-55_2	Interleukin-3	808	0.45	0.645	0.677	0.421	0.836	0.539	-0.056	-0.01	0.045	none			SL000479	IL-3	P08700	3562	IL3
4905-63_1	Coactosin-like protein 1	809	0.44	0.646	0.678	0.51	0.477	0.68	-0.055	-0.079	-0.025	none			SL004814	Coactosin-like protein	Q14019	23406	COTL1
5125-6_3	Siglec-14	810	0.44	0.652	0.682	0.536	0.812	0.488	-0.054	0.007	0.06	none			SL014292	SIG14	Q08ET2	100049587	SIGLEC14
3190-43_1	Growth Arrest Specific 1	811	0.43	0.653	0.682	0.465	0.696	0.564	-0.065	-0.014	0.051	none			SL000658	GAS1	P54826	2619	GAS1
3879-50_1	Hsp90 co-chaperone Cdc37	812	0.43	0.654	0.682	0.47	0.968	0.49	-0.074	-0.003	0.072	none			SL011232	CDC37	Q16543	11140	CDC37
2987-37_3	Histone H1.2	813	0.43	0.654	0.682	0.461	0.953	0.447	-0.119	-0.009	0.111	none			SL005256	Histone H1.2	P16403	3006	HIST1H1C
2742-68_2	Siglec-7	814	0.43	0.654	0.682	0.433	0.612	0.655	0.12	0.082	-0.038	none			SL005218	Siglec-7	Q9Y286	27036	SIGLEC7
5355-69_3	LIGHT/TNFSF14	815	0.43	0.655	0.682	0.449	0.613	0.555	0.142	0.108	-0.034	none			SL004648	LIGHT	O43557	8740	TNFSF14
3387-1_2	p21-activated kinase 3	816	0.43	0.656	0.682	0.511	0.968	0.503	0.118	-0.003	-0.121	none			SL010508	PAK3	O75914	5063	PAK3
3522-57_1	Vasoactive Intestinal Peptide	817	0.43	0.657	0.682	0.397	0.572	0.75	0.066	0.044	-0.022	none			SL000615	Vasoactive Intestinal Peptide	P01282	7432	VIP
3079-62_2	Chemerin	818	0.43	0.658	0.682	0.467	0.397	0.856	0.066	0.083	0.017	none			SL005152	TIG2	Q99969	5919	RARRES2
4455-89_2	Milk fat globule-EGF factor 8	819	0.42	0.659	0.682	0.605	0.77	0.315	-0.065	0.037	0.102	none			SL006523	MFGM	Q08431	4240	MFGE8
3202-28_2	Kremen protein 2	820	0.42	0.66	0.682	0.752	0.61	0.302	0.026	-0.042	-0.068	none			SL010393	KREM2	Q8NCW0	79412	KREMEN2
3066-12_1	Galectin-3	821	0.42	0.66	0.682	0.386	0.786	0.572	0.055	0.017	-0.038	none			SL003744	Galectin-3	P17931	3958	LGALS3
4469-78_2	Carbohydrate sulfotransferase 15	822	0.42	0.66	0.682	0.417	0.902	0.513	-0.282	-0.041	0.242	none			SL007502	ST4S6	Q7LFX5	51363	CHST15
3422-4_2	Cyclin-dependent kinase 1:cyclin B complex	823	0.42	0.663	0.682	0.417	0.779	0.515	0.053	0.019	-0.034	none			SL010494	CDK1/cyclin B	P06493 P14635	983 891	CDC2 CCNB1
2640-3_2	Macrophage stimulatory protein receptor	824	0.42	0.664	0.682	0.296	0.62	0.754	-0.047	-0.029	0.018	none			SL004637	MSP R	Q04912	4486	MST1R
4989-7_1	Fibrinogen gamma chain dimer	825	0.42	0.665	0.682	0.342	0.499	0.886	-0.212	-0.173	0.039	none			SL003341	Fibrinogen g-chain dimer	P02679	2266	FGG
4394-71_2	Fibroblast growth factor 8 isoform A	826	0.41	0.666	0.682	0.366	0.959	0.446	0.077	-0.007	-0.084	none			SL014308	FGF-8A	P55075	2253	FGF8
3867-49_1	Seizure 6-like protein 2	827	0.41	0.666	0.682	0.393	0.656	0.66	0.179	0.094	-0.086	none			SL011630	SE6L2	Q6UXD5	26470	SEZ6L2
3434-34_1	Fibronectin-1 Fragment 3	828	0.41	0.667	0.682	0.497	0.967	0.0932	0.067	0.005	-0.062	none			SL010349	FN1.3	P02751	2335	FN1
2730-58_2	MHC class I chain-related protein A	829	0.41	0.667	0.682	0.546	0.86	0.406	0.059	-0.015	-0.073	none			SL005199	MICA	Q29983	4276	MICA
4135-84_2	Immunoglobulin E	830	0.41	0.667	0.682	0.436	0.889	0.524	-0.032	-0.005	0.027	none			SL000461	IgE	P01854	3497 50802 3535	IGHE IGK@ IGL@
3199-54_2	Kallikrein 12	831	0.41	0.668	0.682	0.896	0.207	0.46	0.023	-0.106	-0.129	none			SL003916	kallikrein 12	Q9UKR0	43849	KLK12
3346-72_2	Aurora-related kinase 2	832	0.41	0.671	0.684	0.612	0.705	0.386	0.011	-0.012	-0.023	none			SL010520	AURKB	Q96GD4	9212	AURKB
3041-55_2	Macrophage mannose receptor 2	833	0.4	0.673	0.685	0.481	0.377	0.868	-0.137	-0.172	-0.035	none			SL008416	MRC2	Q9UBG0	9902	MRC2
2567-5_6	Complement factor I	834	0.4	0.674	0.685	0.915	0.542	0.275	-0.01	0.057	0.067	none			SL003328	Factor I	P05156	3426	CFI
2278-61_4	Tissue inhibitor of metalloproteinases 2	835	0.4	0.674	0.685	0.648	0.362	0.652	0.039	0.076	0.037	none			SL000592	TIMP-2	P16035	7077	TIMP2
4240-31_2	M2-pyruvate kinase	836	0.4	0.675	0.685	0.382	0.663	0.68	0.209	0.111	-0.098	none			SL002650	M2-PK	P14618	5315	PKM2
4328-2_2	Shh receptor Boc	837	0.4	0.676	0.685	0.999	0.431	0.417	0	0.106	0.106	none			SL013490	BOC	Q9BWV1	91653	BOC
2961-1_2	Protein C	838	0.4	0.677	0.685	0.455	0.82	0.518	0.077	0.021	-0.056	none			SL000048	Protein C	P04070	5624	PROC
2785-15_2	Monocyte chemoattractant protein 2	839	0.39	0.678	0.685	0.482	0.457	0.912	0.032	0.036	0.004	none			SL000515	MCP-2	P80075	6355	CCL8
4706-17_2	erythrocyte membrane protein 4.1	840	0.39	0.679	0.685	0.379	0.762	0.599	0.284	0.111	-0.173	none			SL010830	41	P11171	2035	EPB41
5345-51_3	CKAP2/Cytoskeleton-associated protein 2	841	0.39	0.68	0.685	0.744	0.467	0.55	0.036	0.123	0.088	none			SL006675	CKAP2	Q8WWK9	26586	CKAP2
4891-50_1	Glucagon	842	0.39	0.682	0.685	0.726	0.477	0.531	0.04	0.117	0.077	none			SL000433	Glucagon	P01275	2641	GCG
4875-73_1	Complement C3d	843	0.39	0.682	0.685	0.447	0.284	0.891	-0.081	-0.065	0.016	none			SL003362	C3d	P01024	718	C3
2683-1_2	Complement C3b, inactivated	844	0.39	0.683	0.685	0.422	0.559	0.816	-0.06	-0.044	0.015	none			SL000456	iC3b	P01024	718	C3
3453-87_2	Lyn kinase	845	0.39	0.684	0.685	0.41	0.754	0.594	0.299	0.119	-0.179	none			SL006917	LYN	P07948	4067	LYN
2672-60_1	Cripto-1	846	0.39	0.685	0.685	0.47	0.77	0.457	0.018	-0.012	-0.031	none			SL005155	Cripto	P13385	6997	TDGF1
2474-54_5	Serum amyloid P	847	0.38	0.685	0.685	0.478	0.652	0.269	0.334	0.239	-0.094	none			SL000573	SAP	P02743	325	APCS
4546-27_3	EGF-like module-containing mucin-like receptor 2	848	0.38	0.685	0.685	0.382	0.491	0.91	0.039	0.033	-0.006	none			SL008822	EMR2	Q9UHX3	30817	EMR2
3218-8_2	Prostate-specific membrane antigen	849	0.38	0.686	0.685	0.782	0.261	0.597	-0.025	-0.075	-0.05	none			SL000158	PSMA	Q04609	2346	FOLH1
4143-74_2	Lymphotactin	850	0.38	0.687	0.685	0.514	0.523	0.906	-0.044	-0.049	-0.004	none			SL003186	Lymphotactin	P47992	6375	XCL1
4981-6_1	Desmocollin-3	851	0.38	0.687	0.685	0.477	0.467	0.849	-0.044	-0.056	-0.012	none			SL008709	DSC3	Q14574	1825	DSC3
5352-11_3	HVEM/TNFRSF14	852	0.38	0.691	0.687	0.709	0.671	0.366	0.013	-0.016	-0.03	none			SL004145	HVEM	Q92956	8764	TNFRSF14
2794-60_2	Superoxide dismutase [Cu-Zn]	853	0.37	0.692	0.688	0.632	0.752	0.377	0.057	-0.039	-0.096	none			SL000581	SOD	P00441	6647	SOD1
3397-7_4	Tyrosine-protein phosphatase non-receptor type 11	854	0.37	0.695	0.689	0.416	0.617	0.76	0.325	0.215	-0.11	none			SL010616	SHP-2	Q06124	5781	PTPN11
2642-4_1	Platelet-activating factor acetylhydrolase IB subunit beta/PAFAH beta subunit	855	0.37	0.696	0.689	0.649	0.458	0.617	0.115	0.216	0.101	none			SL004760	PAFAH beta subunit	P68402	5049	PAFAH1B2
4916-2_1	Immunoglobulin D	856	0.37	0.696	0.689	0.38	0.832	0.461	0.045	-0.022	-0.068	none			SL000460	IgD	P01880	3495 50802 3535	IGHD IGK@ IGL@
4982-54_1	Elafin	857	0.37	0.697	0.689	0.396	0.796	0.624	-0.16	-0.045	0.115	none			SL004458	Elafin	P19957	5266	PI3
2925-9_1	Plasminogen activator inhibitor 1	858	0.37	0.697	0.689	0.621	0.629	0.488	-0.293	0.11	0.403	none			SL000006	PAI-1	P05121	5054	SERPINE1
3604-6_4	Carnosine dipeptidase 1	859	0.37	0.698	0.689	0.358	0.726	0.673	0.047	0.02	-0.026	none			SL006694	CNDP1	Q96KN2	84735	CNDP1
3822-54_2	MAPK-activated protein kinase 3	860	0.36	0.699	0.689	0.402	0.692	0.68	0.306	0.151	-0.156	none			SL004765	MAPKAPK3	Q16644	7867	MAPKAPK3
3053-49_2	Fms-related tyrosine kinase 3 ligand	861	0.36	0.7	0.689	0.366	0.92	0.566	-0.093	-0.013	0.08	none			SL004343	Flt3 ligand	P49771	2323	FLT3LG
4563-61_2	Phospholipase C-II	862	0.36	0.704	0.692	0.476	0.955	0.409	0.111	0.01	-0.101	none			SL012108	PLCG1	P19174	5335	PLCG1
5335-73_3	Annexin A6	863	0.36	0.705	0.693	0.462	0.553	0.975	0.1	0.097	-0.003	none			SL003647	annexin VI	P08133	309	ANXA6
3401-8_2	Tyrosine-protein phosphatase non-receptor type 2	864	0.35	0.707	0.693	0.597	0.731	0.513	-0.023	0.007	0.031	none			SL005261	TCPTP	P17706	5771	PTPN2
3888-8_1	Inhibitor of growth 1	865	0.35	0.708	0.693	0.461	0.86	0.535	0.151	0.036	-0.114	none			SL009628	ING1	Q9UK53	3621	ING1
3358-51_2	Cyclin-dependent kinase 5:activator p35 complex	866	0.35	0.709	0.693	0.503	0.749	0.606	0.065	0.015	-0.05	none			SL010496	CDK5/p35	Q00535 Q15078	1020 8851	CDK5 CDK5R1
4220-39_2	Tyrosine kinase Fer	867	0.35	0.709	0.693	0.431	0.687	0.683	0.299	0.149	-0.15	none			SL005588	FER	P16591	2241	FER
3032-11_2	Follicle stimulating hormone	868	0.35	0.71	0.693	0.475	0.83	0.524	-0.058	-0.017	0.041	none			SL000428	FSH	P01215 P01225	1081 2488	CGA FSHB
3289-19_2	Carbonic anhydrase-related protein X	869	0.35	0.71	0.693	0.628	0.326	0.751	-0.04	-0.067	-0.027	none			SL010449	Carbonic Anhydrase X	Q9NS85	56934	CA10
5060-62_3	B7 homolog 1/CD274	870	0.35	0.711	0.693	0.359	0.989	0.507	0.078	0.002	-0.076	none			SL004852	B7-H1	Q9NZQ7	29126	CD274
5400-52_3	Leptin receptor	871	0.35	0.712	0.693	0.364	0.567	0.888	-0.041	-0.033	0.008	none			SL003184	sLeptin R	P48357	3953	LEPR
4127-75_1	Complement C6	872	0.34	0.717	0.697	0.525	0.625	0.519	0.265	0.23	-0.035	none			SL000322	C6	P13671	729	C6
2421-7_3	Brain-derived neurotrophic factor	873	0.33	0.721	0.7	0.644	0.821	0.256	-0.028	0.016	0.045	none			SL003951	BDNF	P23560	627	BDNF
3833-10_2	Repulsive guidance molecule A	874	0.33	0.722	0.7	0.764	0.617	0.459	-0.035	0.06	0.095	none			SL010467	RGMA	Q96B86	56963	RGMA
4960-72_1	Annexin A1	875	0.33	0.722	0.7	0.348	0.692	0.762	-0.066	-0.043	0.023	none			SL004208	annexin I	P04083	301	ANXA1
2838-53_1	Matrix metalloproteinase 17/Membrane-type matrix metalloproteinase 4	876	0.33	0.723	0.7	0.732	0.685	0.383	0.02	-0.022	-0.042	none			SL003332	MMP-17	Q9ULZ9	4326	MMP17
2443-10_4	Fibroblast growth factor 8 isoform B	877	0.33	0.726	0.702	0.847	0.184	0.61	-0.015	-0.057	-0.041	none			SL004342	FGF-8B	P55075	2253	FGF8
2981-9_3	Endothelial cell-selective adhesion molecule	878	0.32	0.73	0.702	0.454	0.75	0.65	-0.059	-0.025	0.034	none			SL005160	ESAM	Q96AP7	90952	ESAM
4397-26_2	Inferferon-lamda 2	879	0.32	0.731	0.702	0.553	0.464	0.859	-0.042	-0.053	-0.012	none			SL004349	IFN-lambda 2	Q8IZJ0	282616	IL28A
4468-21_2	Sphingosine kinase 2	880	0.32	0.731	0.702	0.813	0.596	0.508	-0.034	0.104	0.138	none			SL014029	SPHK2	Q9NRA0	56848	SPHK2
3817-18_1	Protein kinase C theta	881	0.32	0.732	0.702	0.45	0.651	0.754	0.268	0.162	-0.106	none			SL007358	KPCT	Q04759	5588	PRKCQ
2771-35_2	Insulin-like growth factor-binding protein 1	882	0.31	0.735	0.702	0.599	0.776	0.451	0.11	-0.094	-0.204	none			SL000462	IGFBP-1	P08833	3484	IGFBP1
4985-11_1	Fatty acid binding protein, epidermal-type	883	0.31	0.736	0.702	0.472	0.519	0.789	-0.03	-0.046	-0.016	none			SL005352	FABPE	Q01469	2171	FABP5
4769-10_3	Olfactomedin-4	884	0.31	0.737	0.702	0.553	0.812	0.442	0.136	-0.093	-0.229	none			SL008590	Olfactomedin-4	Q6UX06	10562	OLFM4
2708-54_2	Tumor necrosis factor ligand superfamily member 18	885	0.31	0.737	0.702	0.821	0.651	0.368	0.008	-0.017	-0.024	none			SL004326	TNFSF18	Q9UNG2	8995	TNFSF18
2989-17_2	Inferferon-gamma	886	0.31	0.738	0.702	0.457	0.709	0.698	0.233	0.118	-0.114	none			SL001802	IFN-g	P01579	3458	IFNG
3484-60_2	Angiotensinogen	887	0.31	0.739	0.702	0.959	0.511	0.471	0.003	0.046	0.042	none			SL000271	Angiotensinogen	P01019	183	AGT
3208-2_4	Matrilin-3	888	0.31	0.739	0.702	0.578	0.528	0.707	-0.032	-0.059	-0.027	none			SL006992	MATN3	O15232	4148	MATN3
2998-53_2	Junctional adhesion molecule C	889	0.31	0.74	0.702	0.464	0.76	0.654	0.23	0.096	-0.134	none			SL005194	JAM-C	Q9BX67	83700	JAM3
4203-50_2	Cofilin-1	890	0.31	0.74	0.702	0.46	0.602	0.781	0.189	0.114	-0.075	none			SL004920	Cofilin-1	P23528	1072	CFL1
4224-7_2	Heterogeneous nuclear ribonucleoprotein Q	891	0.3	0.742	0.702	0.492	0.859	0.542	0.114	0.031	-0.082	none			SL007022	HNRPQ	O60506	10492	SYNCRIP
4693-72_2	3-hydroxyisobutyrate dehydrogenase	892	0.3	0.742	0.702	0.471	0.944	0.549	0.03	0.003	-0.027	none			SL008085	3HIDH	P31937	11112	HIBADH
4318-12_3	Tyrosine phosphatase SHP-1	893	0.3	0.742	0.702	0.465	0.794	0.601	0.287	0.118	-0.169	none			SL004940	PTP-1C	P29350	5777	PTPN6
4535-50_2	Bone marrow stromal cell antigen/CD157	894	0.3	0.743	0.702	0.742	0.721	0.369	0.031	-0.038	-0.07	none			SL008644	BST1	Q10588	683	BST1
4562-1_2	Neurexophilin-1	895	0.3	0.744	0.702	0.619	0.826	0.494	0.109	-0.041	-0.15	none			SL012457	NXPH1	P58417	30010	NXPH1
5196-7_3	N-myristoyltransferase 1	896	0.3	0.745	0.702	0.462	0.684	0.744	0.094	0.057	-0.037	none			SL006476	NMT1	P30419	4836	NMT1
2333-72_1	Transforming growth factor beta-1	897	0.3	0.746	0.702	0.547	0.873	0.528	0.04	0.009	-0.031	none			SL000584	TGF-b1	P01137	7040	TGFB1
5069-9_3	CD55/Complement decay-accelerating factor/DAF	898	0.3	0.746	0.702	0.469	0.755	0.662	0.087	0.039	-0.048	none			SL004556	DAF	P08174	1604	CD55
2558-51_3	beta-Endorphin	899	0.3	0.747	0.702	0.504	0.744	0.657	-0.1	-0.039	0.062	none			SL000300	b-Endorphin	P01189	5443	POMC
3474-19_2	Thrombospondin-1	900	0.3	0.747	0.702	0.59	0.936	0.389	0.031	-0.005	-0.036	none			SL002705	Thrombospondin-1	P07996	7057	THBS1
3889-64_2	Lamin-B1	901	0.29	0.748	0.702	0.538	0.999	0.489	0.05	0	-0.051	none			SL006132	Lamin-B1	P20700	4001	LMNB1
4925-54_2	Matrix metalloproteinase 13/Collagenase 3	902	0.29	0.748	0.702	0.652	0.418	0.738	0.018	0.034	0.017	none			SL000523	MMP-13	P45452	4322	MMP13
5019-16_2	Ubiquitin C-terminal hydrolase-L1	903	0.29	0.749	0.702	0.479	0.633	0.874	-0.148	-0.122	0.026	none			SL002803	PGP9.5	P09936	7345	UCHL1
4392-54_2	Fibroblast growth factor 12	904	0.29	0.749	0.702	0.815	0.54	0.582	-0.026	-0.107	-0.081	none			SL005161	FGF-12	P61328	2257	FGF12
3209-69_1	Matrix extracellular phosphoglycoprotein	905	0.29	0.749	0.702	0.727	0.712	0.446	0.012	-0.015	-0.027	none			SL005437	MEPE	Q9NQ76	56955	MEPE
4471-50_2	Transglutaminase 3	906	0.29	0.751	0.703	0.456	0.528	0.912	-0.512	-0.613	-0.101	none			SL008945	TGM3	Q08188	7053	TGM3
3170-6_1	Methionine aminopeptidase 2	907	0.29	0.753	0.703	0.46	0.713	0.723	0.223	0.127	-0.096	none			SL007261	AMPM2	P50579	10988	METAP2
4719-58_2	Protein disulfide isomerase A3	908	0.29	0.753	0.703	0.959	0.579	0.507	0.004	-0.054	-0.058	none			SL003524	Protein disulfide isomerase A3	P30101	2923	PDIA3
3005-5_2	Tyrosine-protein phosphatase non-receptor type 1	909	0.28	0.755	0.705	0.494	0.837	0.618	0.215	0.062	-0.153	none			SL004939	PTP-1B	P18031	5770	PTPN1
4332-6_2	C-type lectin domain family 1 member B	910	0.28	0.761	0.709	0.708	0.776	0.401	-0.024	0.018	0.042	none			SL013488	CLC1B	Q9P126	51266	CLEC1B
3296-92_2	Contactin-2	911	0.28	0.762	0.709	0.615	0.946	0.25	0.056	-0.008	-0.064	none			SL008623	CNTN2	Q02246	6900	CNTN2
2705-5_2	Thymus expressed chemokine/CCL25	912	0.27	0.766	0.71	0.526	0.869	0.58	0.044	0.011	-0.033	none			SL003197	TECK	O15444	6370	CCL25
3884-5_1	Eukaryotic translation initiation factor 5A	913	0.27	0.767	0.71	0.48	0.902	0.579	0.168	0.036	-0.132	none			SL005687	eIF-5A-1	P63241	1984	EIF5A
5111-15_3	Neurexin-3-beta	914	0.27	0.769	0.71	0.681	0.723	0.537	-0.021	0.02	0.041	none			SL008728	NRX3B	Q9HDB5	9369	NRXN3
3356-50_1	Carbonic anhydrase VII	915	0.26	0.771	0.71	0.535	0.993	0.57	-0.06	0.001	0.061	none			SL004868	Carbonic anhydrase VII	P43166	766	CA7
2770-51_2	CC chemokine I-309/CCL1	916	0.26	0.773	0.71	0.645	0.343	0.841	-0.02	-0.029	-0.009	none			SL003176	I-309	P22362	6346	CCL1
3503-4_2	Integrin alpha-I: beta-1 complex	917	0.26	0.773	0.71	0.516	0.557	0.967	0.289	0.271	-0.019	none			SL003179	Integrin a1b1	P56199 P05556	3672 3688	ITGA1 ITGB1
4876-32_1	Coagulation factor IX	918	0.26	0.773	0.71	0.955	0.529	0.546	-0.005	-0.056	-0.051	none			SL000357	Coagulation Factor IX	P00740	2158	F9
3636-37_4	Oxidized low-density lipoprotein receptor 1	919	0.26	0.774	0.71	0.488	0.758	0.704	-0.032	-0.014	0.017	none			SL007327	OLR1	P78380	4973	OLR1
3357-67_2	Cyclin-dependent kinase 2:cyclin A complex	920	0.26	0.774	0.71	0.706	0.762	0.447	-0.021	0.027	0.048	none			SL010495	CDK2/cyclin A	P24941 P20248	1017 890	CDK2 CCNA2
2728-62_2	Laminin	921	0.26	0.775	0.71	0.491	0.723	0.737	0.167	0.089	-0.078	none			SL000497	Laminin	P25391 P07942 P11047	284217 3912 3915	LAMA1 LAMB1 LAMC1
4389-2_1	Desert Hedgehog N-Terminus	922	0.26	0.775	0.71	0.528	0.931	0.565	0.125	0.019	-0.107	none			SL007003	DHH	O43323	50846	DHH
3886-72_1	Histidine triad nucleotide binding protein 1	923	0.26	0.775	0.71	0.504	0.474	0.946	-0.045	-0.039	0.005	none			SL009431	HINT1	P49773	3094	HINT1
3363-31_4	C-Src kinase	924	0.26	0.777	0.71	0.492	0.817	0.662	0.211	0.074	-0.136	none			SL004781	CSK	P41240	1445	CSK
3727-35_1	Peptide YY	925	0.25	0.779	0.71	0.569	0.849	0.573	-0.212	-0.06	0.152	none			SL011509	PYY	P10082	5697	PYY
2670-67_4	Creatine kinase-MM	926	0.25	0.779	0.71	0.491	0.609	0.935	0.195	0.171	-0.024	none			SL000383	CK-MM	P06732	1158	CKM
5245-40_5	AMP Kinase (alpha2beta2gamma1)	927	0.25	0.779	0.71	0.516	0.866	0.616	0.22	0.06	-0.16	none			SL016549	AMPK a2b2g1	P54646 O43741 P54619	5563 5565 5571	PRKAA2 PRKAB2 PRKAG1
3600-2_3	Chitotriosidase-1	928	0.25	0.779	0.71	0.483	0.665	0.79	0.041	0.023	-0.017	none			SL006029	Chitotriosidase-1	Q13231	1118	CHIT1
3875-62_1	ARID domain-containing protein 3A	929	0.25	0.78	0.71	0.51	0.828	0.64	0.108	0.038	-0.07	none			SL011549	ARI3A	Q99856	1820	ARID3A
2634-2_2	Interleukin-2 receptor gamma chain	930	0.25	0.78	0.71	0.534	0.905	0.594	0.155	0.03	-0.125	none			SL003307	IL-2 sRg	P31785	3561	IL2RG
3894-15_2	N-acetyl-D-glucosamine kinase	931	0.25	0.78	0.71	0.574	0.573	0.815	-0.083	-0.119	-0.036	none			SL005629	NAGK	Q9UJ70	55577	NAGK
4549-78_2	Fucosyltransferase 5	932	0.25	0.78	0.71	0.593	0.592	0.998	0.044	0.044	0	none			SL014008	FUT5	Q11128	2527	FUT5
3324-51_1	T-lymphocyte surface antigen Ly-9/CD229	933	0.25	0.781	0.71	0.722	0.782	0.434	-0.024	0.019	0.043	none			SL007674	LY9	Q9HBG7	4063	LY9
3872-2_1	Fortilin	934	0.25	0.783	0.711	0.535	0.598	0.958	0.136	0.146	0.011	none			SL005679	TCTP	P13693	7178	TPT1
3201-49_2	Kallikrein 5	935	0.25	0.784	0.711	0.579	0.988	0.578	-0.043	0.001	0.044	none			SL003863	kallikrein 5	Q9Y337	25818	KLK5
3505-6_2	Lymphotoxin alpha1:beta2	936	0.24	0.786	0.712	0.572	0.6	0.987	0.059	0.058	-0.001	none			SL000507	Lymphotoxin a1/b2	P01374 Q06643	4049 4050	LTA LTB
3825-18_2	MAPK 8	937	0.24	0.789	0.713	0.832	0.689	0.486	0.066	-0.158	-0.224	none			SL010502	MK08	P45983	5599	MAPK8
2853-68_2	Serine-threonine-protein kinase Chk1	938	0.24	0.79	0.713	0.512	0.781	0.703	0.017	0.007	-0.01	none			SL006911	CHK1	O14757	1111	CHEK1
2943-5_2	Cytochrome P450 3A4	939	0.24	0.79	0.713	0.507	0.786	0.702	0.166	0.068	-0.098	none			SL000398	Cytochrome P450 3A4	P08684	1576	CYP3A4
4258-15_2	ErbB3 binding protein Ebp1	940	0.24	0.791	0.713	0.505	0.721	0.772	0.211	0.13	-0.081	none			SL008331	PA2G4	Q9UQ80	5036	PA2G4
2211-9_6	Tissue inhibitor of metalloproteinases 1	941	0.24	0.791	0.713	0.785	0.686	0.519	-0.02	0.028	0.048	none			SL000591	TIMP-1	P01033	7076	TIMP1
4992-49_1	Progranulin	942	0.24	0.792	0.713	0.654	0.612	0.659	-0.069	-0.322	-0.253	none			SL007173	GRN	P28799	2896	GRN
3854-24_1	Nascent polypeptide-associated complex alpha subunit	943	0.23	0.794	0.714	0.537	0.966	0.563	0.146	-0.013	-0.159	none			SL011631	NACA	Q13765	4666	NACA
4137-57_2	Interleukin-17E	944	0.23	0.797	0.716	0.622	0.921	0.508	-0.02	0.005	0.025	none			SL004351	IL-17E	Q9H293	64806	IL25
5229-90_3	IMP (inosine 5'-monophosphate) dehydrogenase 1	945	0.23	0.799	0.716	0.49	0.653	0.905	0.223	0.181	-0.042	none			SL014735	IMDH1	P20839	3614	IMPDH1
4184-43_3	Eukaryotic translation initiation factor 4E-binding protein 2	946	0.23	0.8	0.716	0.499	0.759	0.744	-0.037	-0.016	0.02	none			SL008378	4EBP2	Q13542	1979	EIF4EBP2
2500-2_3	Angiopoietin-4	947	0.23	0.8	0.716	0.609	0.534	0.863	-0.025	-0.034	-0.009	none			SL004643	Angiopoietin-4	Q9Y264	51378	ANGPT4
3174-2_1	ADAM metallopeptidase with thrombospondin motifs 1	948	0.22	0.801	0.716	0.788	0.734	0.458	-0.014	0.017	0.031	none			SL008421	ATS1	Q9UHI8	9510	ADAMTS1
4914-10_1	Human Chorionic Gonadotropin	949	0.22	0.802	0.716	0.588	0.666	0.913	0.06	0.054	-0.006	none			SL001766	HCG	P01215 P01233	1081 1082	CGA CGB
4904-7_1	Caspase-2	950	0.22	0.803	0.716	0.97	0.603	0.56	-0.004	0.063	0.067	none			SL003710	Caspase-2	P42575	835	CASP2
4487-1_1	Fibroblast growth factor 7	951	0.22	0.803	0.716	0.515	0.697	0.825	0.157	0.106	-0.051	none			SL001691	FGF7	P21781	2252	FGF7
2813-11_2	Agouti-related protein	952	0.22	0.804	0.717	0.566	0.555	0.93	-0.096	-0.113	-0.017	none			SL006924	ART	O00253	181	AGRP
3882-10_1	Elongation factor 1-beta	953	0.22	0.805	0.717	0.577	0.618	0.998	0.176	0.176	-0.001	none			SL005685	EF-1-beta	P24534	1933	EEF1B2
5252-33_3	cAMP and cGMP phosphodiesterase 11A/PDE11A	954	0.22	0.806	0.717	0.548	0.991	0.594	0.028	-0.001	-0.029	none			SL016555	PDE11	Q9HCR9	50940	PDE11A
2480-58_3	Tissue inhibitor of metalloproteinases 3	955	0.21	0.809	0.718	0.58	0.554	0.996	0.052	0.051	0	none			SL003043	TIMP-3	P35625	7078	TIMP3
3059-50_2	B-cell-activating factor	956	0.21	0.81	0.718	0.38	0.611	0.944	-0.039	-0.045	-0.006	none			SL004327	BAFF	Q9Y275	10673	TNFSF13B
2953-31_2	Luteinizing hormone	957	0.21	0.811	0.718	0.574	0.944	0.61	0.13	0.017	-0.114	none			SL000506	Luteinizing hormone	P01215 P01229	1081 3972	CGA LHB
5139-32_3	Netrin receptor UNC5H3	958	0.21	0.811	0.718	0.928	0.671	0.501	-0.002	0.015	0.017	none			SL005230	UNC5H3	O95185	8633	UNC5C
3374-49_2	Hemopoietic cell kinase	959	0.21	0.814	0.718	0.905	0.579	0.578	-0.01	0.039	0.049	none			SL010499	HCK	P08631	3055	HCK
3392-68_2	Protein kinase B alpha/beta/gamma (RAC family)	960	0.21	0.814	0.718	0.722	0.807	0.525	0.103	-0.069	-0.172	none			SL017614	PKB a/b/g	Family	None	None
3022-4_2	Cytotoxic T-lymphocyte-4	961	0.21	0.815	0.718	0.568	0.791	0.683	0.099	0.048	-0.051	none			SL000384	CTLA-4	P16410	1493	CTLA4
4460-8_2	3-phosphoinositide-dependent protein kinase 1	962	0.21	0.815	0.718	0.564	0.922	0.636	0.219	0.038	-0.181	none			SL006998	PDPK1	O15530	5170	PDPK1
3538-26_1	Dopa decarboxylase	963	0.21	0.816	0.718	0.613	0.933	0.396	-0.033	-0.006	0.027	none			SL009216	dopa decarboxylase	P20711	1644	DDC
3446-7_2	Interleukin-18 receptor alpha	964	0.21	0.816	0.718	0.749	0.678	0.584	-0.024	0.017	0.041	none			SL004152	IL-18 Ra	Q13478	8809	IL18R1
4393-3_1	Fibroblast growth factor 16	965	0.2	0.819	0.718	0.539	0.777	0.745	0.188	0.092	-0.096	none			SL004334	FGF-16	O43320	8823	FGF16
3438-10_2	Follistatin-like 3	966	0.2	0.82	0.718	0.634	0.619	0.715	-0.052	-0.157	-0.104	none			SL009324	FSTL3	O95633	10272	FSTL3
2915-6_2	Proliferating cell nuclear antigen	967	0.2	0.82	0.718	0.795	0.596	0.612	-0.02	-0.046	-0.026	none			SL000131	PCNA	P12004	5111	PCNA
4355-13_1	Death-associated protein kinase 2	968	0.2	0.821	0.718	0.549	0.734	0.794	0.215	0.132	-0.083	none			SL007752	DAPK2	Q9UIK4	23604	DAPK2
4498-62_2	Neural cell adhesion molecule 1, 120 kDa isoform	969	0.2	0.822	0.718	0.694	0.853	0.52	0.06	-0.032	-0.092	none			SL003764	NCAM-120	P13591	4684	NCAM1
3897-61_1	Pyridoxal phosphate phosphatase	970	0.2	0.822	0.718	0.548	0.841	0.695	0.227	0.08	-0.147	none			SL011709	PLPP	Q96GD0	57026	PDXP
2966-65_2	Stem Cell Growth Factor-beta	971	0.19	0.825	0.718	0.635	0.637	0.996	-0.016	-0.016	0	none			SL004362	SCGF-beta	Q9Y240	6320	CLEC11A
5359-65_3	Proto-oncogene serine/threonine-protein kinase Pim-1	972	0.19	0.826	0.718	0.727	0.595	0.733	-0.024	-0.051	-0.026	none			SL002702	PIM1	P11309	5292	PIM1
5202-4_3	Peptidylprolyl isomerase D	973	0.19	0.826	0.718	0.547	0.681	0.966	-0.159	-0.148	0.01	none			SL007373	PPID	Q08752	5481	PPID
4482-66_2	Complement C5b,6 Complex	974	0.19	0.828	0.718	0.558	0.841	0.675	0.059	0.023	-0.035	none			SL000321	C5b, 6 Complex	P01031 P13671	727 729	C5 C6
4209-60_2	Dopamine responsive protein	975	0.19	0.828	0.718	0.556	0.823	0.709	0.203	0.084	-0.119	none			SL004757	DRG-1	Q9NP79	51534	VTA1
3435-53_2	Fibronectin-1 Fragment 4	976	0.19	0.829	0.718	0.505	0.775	0.784	-0.064	-0.033	0.031	none			SL010348	FN1.4	P02751	2335	FN1
2855-49_2	MAPK 3/ERK-1	977	0.19	0.832	0.718	0.595	0.999	0.6	0.146	0	-0.147	none			SL000409	ERK-1	P27361	5595	MAPK3
3351-1_1	Calcium-calmodulin-dependent protein kinase II beta	978	0.18	0.833	0.718	0.771	0.549	0.737	0.092	0.191	0.099	none			SL010492	CAMK2B	Q13554	816	CAMK2B
4588-1_2	Pancreatic hormone	979	0.18	0.834	0.718	0.758	0.851	0.344	0.027	-0.017	-0.044	none			SL011499	PH	P01298	5539	PPY
2700-56_2	Protein S	980	0.18	0.834	0.718	0.568	0.686	0.87	0.046	0.033	-0.013	none			SL000049	Protein S	P07225	5627	PROS1
3314-74_2	GDNF family receptor alpha1	981	0.18	0.834	0.718	0.527	0.796	0.76	0.051	0.027	-0.024	none			SL004858	GFRa-1	P56159	2674	GFRA1
3216-2_2	Polymeric immunoglobulin receptor	982	0.18	0.834	0.718	0.46	0.906	0.714	-0.125	-0.029	0.096	none			SL005797	PIGR	P01833	5284	PIGR
5272-55_2	SHC-transforming protein 1	983	0.18	0.834	0.718	0.583	0.688	0.928	0.133	0.115	-0.018	none			SL014469	SHC1	P29353	6464	SHC1
2970-60_2	Amphiregulin	984	0.18	0.835	0.718	0.567	0.857	0.7	0.204	0.068	-0.136	none			SL000136	AREG	P15514	374	AREG
4359-87_1	Dual-specificity protein kinase 3	985	0.18	0.837	0.718	0.759	0.78	0.575	0.016	-0.017	-0.033	none			SL013570	DYRK3	O43781	8444	DYRK3
3181-50_2	Cathepsin S	986	0.18	0.838	0.718	0.809	0.538	0.72	0.01	0.024	0.014	none			SL004673	Cathepsin S	P25774	1520	CTSS
4801-13_3	Lactoperoxidase	987	0.18	0.838	0.718	0.647	0.994	0.654	-0.028	0	0.028	none			SL007153	PERL	P22079	4025	LPO
2769-3_2	HIV-2 Rev	988	0.18	0.839	0.718	0.851	0.698	0.586	-0.014	0.03	0.043	none			SL000445	HIV-2 Rev	P18093	1724716	Human-virus
2977-7_2	Ectodermal Dysplasia Receptor	989	0.18	0.839	0.718	0.993	0.662	0.531	-0.001	0.045	0.045	none			SL004872	EDAR	Q9UNE0	10913	EDAR
3009-3_2	Transforming growth factor beta receptor type III	990	0.18	0.84	0.718	0.661	0.929	0.605	-0.043	0.008	0.052	none			SL005059	TGF-b R III	Q03167	7049	TGFBR3
4970-55_1	Carbonic anhydrase II	991	0.17	0.841	0.718	0.542	0.677	0.947	0.047	0.041	-0.006	none			SL000339	carbonic anhydrase II	P00918	760	CA2
5096-51_3	Killer cell immunoglobulin-like receptor 3DL2	992	0.17	0.842	0.718	0.451	0.705	0.919	0.078	0.062	-0.016	none			SL014269	KI3L2	P43630	3812	KIR3DL2
5007-1_1	MAPK 14	993	0.17	0.843	0.718	0.574	0.731	0.843	0.19	0.129	-0.061	none			SL006920	MAPK14	Q16539	1432	MAPK14
2946-52_2	Complement factor D	994	0.17	0.843	0.718	0.685	0.928	0.625	0.023	-0.004	-0.027	none			SL003327	Factor D	P00746	1675	CFD
3481-87_1	X-Pro aminopeptidase 1	995	0.17	0.844	0.718	0.66	0.622	0.893	0.136	0.172	0.036	none			SL011073	XPNPEP1	Q9NQW7	7511	XPNPEP1
3874-8_1	Ubiquitin-conjugating enzyme E2 L3	996	0.17	0.844	0.718	0.622	0.984	0.624	0.156	0.007	-0.149	none			SL008157	UB2L3	P68036	7332	UBE2L3
3758-68_3	Activated Protein C	997	0.17	0.845	0.718	0.679	0.566	0.86	-0.019	-0.028	-0.009	none			SL003974	Activated Protein C	P04070	5624	PROC
4230-1_2	Eukaryotic translation initiation factor G2	998	0.17	0.846	0.718	0.577	0.835	0.729	0.23	0.092	-0.138	none			SL011211	IF4G2	P78344	1982	EIF4G2
3405-6_2	Ubiquitin-fold modifier-conjugating enzyme 1	999	0.17	0.848	0.718	0.604	0.689	0.915	0.149	0.122	-0.026	none			SL010529	UFC1	Q9Y3C8	51506	UFC1
4474-19_2	Ubiquitin	1000	0.17	0.848	0.718	0.656	0.609	0.882	0.028	0.038	0.01	none			SL004070	Ubiquitin	P62979	6233	RPS27A
3432-21_2	Ephrin type-A receptor 3	1001	0.17	0.848	0.718	0.64	0.98	0.628	-0.034	-0.002	0.033	none			SL010498	EPHA3	P29320	2042	EPHA3
4494-63_2	Interleukin-23	1002	0.17	0.848	0.718	0.56	0.76	0.811	-0.062	-0.034	0.027	none			SL005184	IL-23	P29460 Q9NPF7	3593 51561	IL12B IL23A
3866-7_2	Ribosome maturation protein SBDS	1003	0.16	0.851	0.719	0.742	0.844	0.547	0.083	-0.058	-0.141	none			SL011529	SBDS	Q9Y3A5	51119	SBDS
5256-86_3	cGMP-binding cGMP-specific phosphodiesterase/PDE5A	1004	0.16	0.852	0.72	0.629	0.622	0.97	0.216	0.233	0.017	none			SL011405	PDE5A	O76074	8654	PDE5A
5246-64_3	Phosphodiesterase 2A, cGMP-stimulated	1005	0.16	0.856	0.722	0.539	0.896	0.728	0.035	0.01	-0.026	none			SL005730	cGMP-stimulated PDE	O00408	5138	PDE2A
2612-5_2	Eukaryotic translation initiation factor 5	1006	0.15	0.86	0.722	0.587	0.843	0.727	0.1	0.046	-0.055	none			SL004759	eIF-5	P55010	1983	EIF5
2571-12_3	Insulin-like growth factor-binding protein 3	1007	0.15	0.86	0.722	0.694	0.651	0.869	0.015	0.019	0.005	none			SL000045	IGFBP-3	P17936	3486	IGFBP3
2809-25_2	ADAM metallopeptidase with thrombospondin motifs 4/Aggrecanase 1	1008	0.15	0.862	0.722	0.897	0.717	0.644	0.003	-0.014	-0.017	none			SL004625	ADAMTS-4	O75173	9507	ADAMTS4
2773-50_2	Interleukin-10	1009	0.15	0.862	0.722	0.718	0.564	0.89	0.039	0.051	0.013	none			SL001717	IL-10	P22301	3586	IL10
5491-12_3	Testican-2/SPOCK2	1010	0.15	0.863	0.722	0.963	0.572	0.682	0.009	0.093	0.085	none			SL010471	Testican-2	Q92563	9806	SPOCK2
2948-58_2	Growth hormone receptor	1011	0.15	0.864	0.722	0.561	0.868	0.757	0.014	0.005	-0.01	none			SL005168	Growth hormone receptor	P10912	2690	GHR
4149-8_2	Platelet-derived growth factor B chain homodimer	1012	0.15	0.865	0.722	0.845	0.723	0.631	0.051	-0.09	-0.141	none			SL000537	PDGF-BB	P01127	5155	PDGFB
3905-62_1	Ubiquitin-conjugating enzyme E2 N	1013	0.14	0.866	0.722	0.595	0.746	0.893	0.134	0.104	-0.031	none			SL008143	UBE2N	P61088	7334	UBE2N
3499-77_2	Interleukin-17B	1014	0.14	0.866	0.722	0.845	0.675	0.708	-0.014	-0.052	-0.039	none			SL004350	IL-17B	Q9UHF5	27190	IL17B
4383-97_1	Activin AB/Inhibin beta-A:beta-B heterodimer	1015	0.14	0.867	0.722	0.691	0.977	0.574	0.07	-0.005	-0.075	none			SL004837	Activin AB	P08476 P09529	3624 3625	INHBA INHBB
3143-3_1	T-cell surface glycoprotein CD4	1016	0.14	0.867	0.722	0.674	0.603	0.937	0.011	0.013	0.002	none			SL002524	sCD4	P01730	920	CD4
3865-53_1	Ribosomal protein S6 kinase 5	1017	0.14	0.868	0.722	0.603	0.84	0.757	0.135	0.058	-0.078	none			SL006919	RSK-like protein kinase	O75582	9252	RPS6KA5
3179-51_2	Cathepsin A	1018	0.14	0.868	0.722	0.579	0.928	0.691	0.026	0.006	-0.02	none			SL009213	Cathepsin A	P10619	5476	CTSA
3469-74_1	Ribosomal protein S6 kinase alpha-3	1019	0.14	0.868	0.722	0.623	0.755	0.839	-0.221	-0.141	0.08	none			SL010515	RPS6KA3	P51812	6197	RPS6KA3
3860-7_2	Proteasome subunit alpha type 6	1020	0.14	0.869	0.722	0.627	0.914	0.683	0.089	0.022	-0.067	none			SL005630	PSA6	P60900	5687	PSMA6
5250-53_3	IMP (inosine 5'-monophosphate) dehydrogenase 2	1021	0.14	0.87	0.722	0.64	0.666	0.937	0.077	0.091	0.014	none			SL010928	IMDH2	P12268	3615	IMPDH2
5031-10_1	alphaII-Spectrin	1022	0.14	0.87	0.722	0.792	0.827	0.57	-0.05	0.042	0.093	none			SL008190	SPTA2	Q13813	6709	SPTAN1
3814-63_1	Interleukin-11 receptor alpha	1023	0.14	0.873	0.722	0.902	0.512	0.736	-0.028	-0.116	-0.088	none			SL007423	IL-11 RA	Q14626	3590	IL11RA
5117-14_3	Roundabout axon guidance molecule 3, ROBO3	1024	0.14	0.874	0.722	0.555	0.693	0.965	0.024	0.022	-0.003	none			SL014148	ROBO3	Q96MS0	64221	ROBO3
3858-5_1	Acid phosphatase 1, soluble	1025	0.14	0.874	0.722	0.741	0.67	0.793	0.064	0.112	0.048	none			SL008063	PPAC	P24666	52	ACP1
3347-9_2	beta-adrenergic receptor kinase 1	1026	0.14	0.874	0.722	0.628	0.893	0.707	0.13	0.041	-0.09	none			SL002792	BARK1	P25098	156	ADRBK1
4923-79_1	Muellerian-inhibiting factor	1027	0.13	0.874	0.722	0.595	0.721	0.98	-0.036	-0.038	-0.002	none			SL005201	MIS	P03971	268	AMH
3365-7_2	Dickkopf-related protein 4	1028	0.13	0.879	0.725	1	0.66	0.67	0	-0.135	-0.135	none			SL010612	Dkk-4	Q9UBT3	27121	DKK4
3359-11_2	Cyclin-dependent kinase 8:cyclin C complex	1029	0.13	0.879	0.725	0.636	0.847	0.751	0.145	0.064	-0.081	none			SL010522	CDK8/cyclin C	P49336 P24863	1024 892	CDK8 CCNC
3029-52_2	Dendritic cell-specific ICAM-3-grabbing nonintegrin 1/CD209	1030	0.13	0.88	0.725	0.813	0.849	0.475	-0.031	0.025	0.057	none			SL005157	DC-SIGN	Q9NNX6	30835	CD209
3419-49_2	Calcium-calmodulin-dependent protein kinase II delta	1031	0.13	0.881	0.725	0.639	0.837	0.774	0.098	0.043	-0.055	none			SL010493	CAMK2D	Q13557	817	CAMK2D
2696-87_2	Persephin	1032	0.12	0.885	0.727	0.81	0.845	0.558	0.015	-0.012	-0.027	none			SL004685	Persephin	O60542	5623	PSPN
4187-49_2	6-Phosphogluconate dehydrogenase	1033	0.12	0.886	0.727	0.834	0.828	0.538	-0.038	0.052	0.09	none			SL000247	6-Phosphogluconate dehydrogenase	P52209	5226	PGD
5082-51_3	Interleukin-1 receptor accessory protein-like 2/IL-1 sR9	1034	0.12	0.888	0.728	0.91	0.704	0.704	0.004	0.023	0.019	none			SL004849	IL-1 sR9	Q9NP60	26280	IL1RAPL2
4996-66_1	Histidine-proline-rich glycoprotein	1035	0.12	0.888	0.728	0.747	0.913	0.686	0.095	-0.021	-0.116	none			SL006448	HRG	P04196	3273	HRG
5364-7_3	SET nuclear oncogene protein	1036	0.12	0.89	0.728	0.685	0.704	0.995	0.043	0.043	-0.001	none			SL007336	SET	Q01105	6418	SET
5410-53_3	Cadherin 15, type 1, M-cadherin (myotubule)	1037	0.12	0.891	0.728	0.652	0.981	0.715	0.021	-0.001	-0.022	none			SL007295	CAD15	P55291	1013	CDH15
4179-57_3	14-3-3 protein family	1038	0.12	0.891	0.728	0.626	0.817	0.823	0.083	0.042	-0.041	none			SL017611	14-3-3	P31946 P62258 P61981 Q04917 P27348 P63104 P31947	7529 7531 7532 7533 10971 7534 2810	YWHAB YWHAE YWHAG YWHAH YWHAQ YWHAZ SFN
2429-27_4	Complement C8	1039	0.11	0.892	0.728	0.904	0.661	0.671	0.011	-0.028	-0.039	none			SL000324	C8	P07357 P07358 P07360	731 732 733	C8A C8B C8G
3516-60_2	Stromal cell-derived factor 1	1040	0.11	0.893	0.728	0.75	0.635	0.893	-0.042	-0.057	-0.015	none			SL004712	SDF-1	P48061	6387	CXCL12
2611-72_2	Tyrosine-protein kinase receptor TYRO3	1041	0.11	0.897	0.73	0.881	0.575	0.764	-0.007	-0.02	-0.013	none			SL004136	Dtk	Q06418	7301	TYRO3
2614-28_2	Ephrin-A4	1042	0.11	0.897	0.73	0.844	0.654	0.788	-0.009	-0.029	-0.02	none			SL004140	Ephrin-A4	P52798	1945	EFNA4
3466-8_2	cAMP-dependent protein kinase catalytic subunit alpha	1043	0.11	0.9	0.732	0.806	0.857	0.632	0.106	-0.085	-0.191	none			SL010513	PRKACA	P17612	5566	PRKACA
3831-21_1	Phosphatase and tensin homolog	1044	0.1	0.901	0.732	0.632	0.814	0.865	0.115	0.076	-0.039	none			SL003761	pTEN	P60484	5728	PTEN
3845-51_2	Dynein light chain roadblock-type 1	1045	0.1	0.904	0.734	0.67	0.899	0.746	0.149	0.052	-0.097	none			SL011530	DLRB1	Q9NP97	83658	DYNLRB1
4903-72_1	Calcineurin	1046	0.1	0.906	0.735	0.656	0.791	0.887	0.107	0.073	-0.034	none			SL003657	Calcineurin	Q08209 P63098	5530 5534	PPP3CA PPP3R1
4890-10_1	Adrenocorticotropic hormone	1047	0.1	0.907	0.735	0.782	0.9	0.672	-0.052	0.022	0.074	none			SL003461	ACTH	P01189	5443	POMC
4490-65_2	Interleukin-3 receptor alpha	1048	0.09	0.911	0.737	0.679	0.864	0.804	0.074	0.032	-0.042	none			SL005187	IL-3 Ra	P26951	3563	IL3RA
2858-29_2	Histone acetyltransferase 1	1049	0.09	0.915	0.737	0.672	0.747	0.921	-0.037	-0.027	0.01	none			SL004725	Hat1	O14929	8520	HAT1
2870-29_2	Ras-related C3 botulinum toxin substrate 1	1050	0.09	0.915	0.737	0.708	0.96	0.744	0.089	0.013	-0.076	none			SL004009	RAC1	P63000	5879	RAC1
4423-77_2	Apoptosis regulator Bcl-X	1051	0.09	0.916	0.737	0.762	0.955	0.703	-0.018	0.003	0.022	none			SL003674	BCL2-like 1 protein	Q07817	598	BCL2L1
5014-49_1	NCK adaptor protein 1	1052	0.09	0.916	0.737	0.801	0.698	0.852	0.035	0.057	0.023	none			SL006091	NCK1	P16333	4690	NCK1
2605-49_2	CD30	1053	0.09	0.917	0.737	0.797	0.713	0.861	0.015	0.023	0.008	none			SL004180	CD30	P28908	943	TNFRSF8
3459-49_2	Platelet-derived growth factor receptor beta-type	1054	0.09	0.918	0.737	0.964	0.712	0.732	0.002	0.018	0.016	none			SL004155	PDGF Rb	P09619	5159	PDGFRB
3903-49_2	Sorting nexin 4	1055	0.09	0.918	0.737	0.687	0.861	0.824	0.141	0.067	-0.074	none			SL005372	Sorting nexin 4	O95219	8723	SNX4
3827-22_1	p21-activated kinase 6	1056	0.09	0.919	0.737	0.532	0.888	0.841	-0.037	-0.016	0.022	none			SL010509	PAK6	Q9NQU5	56924	PAK6
2857-70_2	Glucocorticoid receptor	1057	0.08	0.92	0.737	0.716	0.933	0.759	0.022	0.005	-0.017	none			SL006914	Glucocorticoid receptor	P04150	2908	NR3C1
3494-71_3	Fibroblast growth factor 17	1058	0.08	0.92	0.737	0.988	0.734	0.718	-0.001	0.022	0.023	none			SL004335	FGF-17	O60258	8822	FGF17
2843-13_2	Kunitz-type protease inhibitor 2A	1059	0.08	0.92	0.737	0.718	0.719	0.979	0.015	0.014	-0.001	none			SL001897	SPINT2	O43291	10653	SPINT2
5316-54_3	Prothrombin	1060	0.08	0.921	0.737	0.916	0.649	0.779	-0.011	-0.04	-0.029	none			SL000558	Prothrombin	P00734	2147	F2
5412-53_3	CD27/TNFRSF7	1061	0.08	0.922	0.737	0.752	0.702	0.975	0.039	0.043	0.003	none			SL004134	CD27	P26842	939	CD27
4479-14_2	C1-Esterase Inhibitor	1062	0.08	0.922	0.737	0.791	0.691	0.884	-0.013	-0.02	-0.007	none			SL000308	C1-Esterase Inhibitor	P05155	710	SERPING1
2618-10_2	erbB4/HER4	1063	0.08	0.923	0.737	0.854	0.832	0.721	-0.014	0.029	0.043	none			SL003803	ERBB4	Q15303	2066	ERBB4
3166-92_1	Siglec-3	1064	0.08	0.925	0.737	0.971	0.77	0.623	0.005	0.047	0.042	none			SL005215	Siglec-3	P20138	945	CD33
4238-4_2	Protein lin-7 homolog B	1065	0.08	0.926	0.737	0.81	0.718	0.866	0.041	0.067	0.026	none			SL012168	LIN7B	Q9HAP6	64130	LIN7B
5020-50_1	Phosphoglycerate kinase 1	1066	0.08	0.927	0.737	0.869	0.728	0.797	-0.033	-0.082	-0.049	none			SL003653	phosphoglycerate kinase 1	P00558	5230	PGK1
3902-21_2	S-phase kinase-associated protein 1	1067	0.08	0.928	0.737	0.715	0.789	0.94	0.052	0.042	-0.01	none			SL008808	SKP1	P63208	6500	SKP1
3033-57_1	Galectin-2	1068	0.07	0.929	0.737	0.746	0.746	0.872	0.017	0.03	0.014	none			SL005164	Galectin-2	P05162	3957	LGALS2
5356-2_3	MIF/macrophage migration inhibitory factor	1069	0.07	0.93	0.737	0.699	0.839	0.892	-0.08	-0.055	0.024	none			SL003080	MIF	P14174	4282	MIF
5008-51_1	Superoxide dismutase [Mn]	1070	0.07	0.932	0.737	0.989	0.753	0.742	-0.001	0.032	0.033	none			SL001815	Mn SOD	P04179	6648	SOD2
2877-3_1	SUMO-conjugating enzyme UBC9	1071	0.07	0.933	0.737	0.931	0.775	0.727	0.02	0.089	0.069	none			SL004306	UBC9	P63279	7329	UBE2I
4593-11_1	Pituitary adenylate cyclase-activating polypeptide 27	1072	0.07	0.933	0.737	0.786	0.737	0.897	0.01	0.016	0.005	none			SL011508	PACAP-27	P18509	116	ADCYAP1
4564-2_2	Plexin C1	1073	0.07	0.934	0.737	0.782	0.986	0.734	-0.012	0.001	0.013	none			SL006406	PLXC1	O60486	10154	PLXNC1
4245-80_2	MDM2 ubiquitin ligase	1074	0.07	0.934	0.737	0.733	0.8	0.954	-0.042	-0.036	0.006	none			SL001999	MDM2	Q00987	4193	MDM2
4131-72_2	Fibronectin	1075	0.07	0.935	0.737	0.766	0.965	0.749	-0.03	0.005	0.036	none			SL000426	Fibronectin	P02751	2335	FN1
5383-14_3	B-cell-activating factor receptor/TNFRSF13C	1076	0.07	0.935	0.737	0.738	0.83	0.909	0.048	0.037	-0.011	none			SL004671	BAFF Receptor	Q96RJ3	115650	TNFRSF13C
2846-24_2	Ubiquitin+1, truncated mutation for UbB	1077	0.07	0.937	0.737	0.812	0.765	0.868	0.049	0.082	0.033	none			SL000605	Ubiquitin+1	P62979	6233	RPS27A
4250-23_3	NSFL1 cofactor p47	1078	0.06	0.938	0.737	0.743	0.945	0.756	0.087	0.022	-0.065	none			SL006268	NSF1C	Q9UNZ2	55968	NSFL1C
3030-3_2	Dendritic cell-specific ICAM-3-grabbing nonintegrin 2/CD299	1079	0.06	0.938	0.737	0.816	0.922	0.73	0.05	-0.023	-0.073	none			SL005158	DC-SIGNR	Q9H2X3	10332	CLEC4M
4396-54_1	Inferferon-lamda 1	1080	0.06	0.939	0.737	0.763	0.782	0.977	0.029	0.032	0.003	none			SL004348	IFN-lambda 1	Q8IU54	282618	IL29
2201-17_6	Endostatin	1081	0.06	0.94	0.737	0.786	0.968	0.78	-0.037	0.005	0.042	none			SL000403	Endostatin	P39060	80781	COL18A1
2599-51_2	4-1BB ligand/CD137L	1082	0.06	0.94	0.737	0.784	0.997	0.777	-0.013	0	0.013	none			SL003735	4-1BB ligand	P41273	8744	TNFSF9
2570-72_5	Insulin-like growth factor-binding protein 2	1083	0.06	0.941	0.737	0.846	0.855	0.768	-0.016	0.009	0.024	none			SL000466	IGFBP-2	P18065	3485	IGFBP2
3028-36_2	Ck-beta-8-1/Macrophage inflammatory protein 3 splice variant (aa 46-137)	1084	0.06	0.943	0.738	0.937	0.849	0.564	-0.003	0.008	0.012	none			SL003301	Ck-b-8-1	P55773	6368	CCL23
3890-8_2	Lactate dehydrogenase 1 (heart)	1085	0.06	0.945	0.738	0.711	0.865	0.888	0.028	0.015	-0.013	none			SL000493	LDH-H 1	P07195	3945	LDHB
5061-27_3	B7 homolog 2/ICOS ligand	1086	0.05	0.951	0.741	0.926	0.834	0.764	0.023	-0.055	-0.079	none			SL004853	B7-H2	O75144	23308	ICOSLG
3868-8_1	Small glutamine-rich tetratricopeptide repeat-containing protein alpha	1087	0.05	0.951	0.741	0.76	0.89	0.866	0.107	0.056	-0.052	none			SL011533	SGTA	O43765	6449	SGTA
3710-49_2	Angiostatin	1088	0.05	0.952	0.741	0.788	0.813	0.959	0.012	0.01	-0.002	none			SL000268	Angiostatin	P00747	5340	PLG
2986-49_2	Gro-beta/gamma	1089	0.05	0.953	0.741	0.95	0.844	0.724	0.017	-0.062	-0.079	none			SL017610	Gro-b/g	P19876 P19875	None	CXCL3 CXCL2
3046-31_1	Resistin	1090	0.05	0.955	0.741	0.799	0.781	0.905	-0.014	-0.026	-0.012	none			SL004260	resistin	Q9HD89	56729	RETN
5109-24_3	NRCAM/neuronal cell adhesion molecule	1091	0.05	0.955	0.741	0.852	0.768	0.905	0.012	0.019	0.007	none			SL005210	Nr-CAM	Q92823	4897	NRCAM
4228-37_2	Heat shock cognate 71 kDa protein	1092	0.04	0.957	0.741	0.962	0.791	0.793	0.005	0.029	0.023	none			SL004899	HSP70 protein 8	P11142	3312	HSPA8
3441-64_2	Glycogen synthase kinase-3 alpha/beta	1093	0.04	0.957	0.741	0.824	0.969	0.781	0.048	-0.009	-0.057	none			SL017188	GSK-3 alpha/beta	P49840 P49841	2931 2932	GSK3A GSK3B
3810-50_2	Proto-oncogene tyrosine-protein kinase FGR	1094	0.04	0.957	0.741	0.825	0.951	0.811	-0.024	0.006	0.03	none			SL006912	FGR	P09769	2268	FGR
4212-5_3	Epidermal growth factor receptor substrate 15-like 1	1095	0.04	0.957	0.741	0.965	0.853	0.689	-0.006	0.028	0.034	none			SL012188	EP15R	Q9UBC2	58513	EPS15L1
2962-50_2	Parathyroid hormone-related protein	1096	0.04	0.958	0.741	0.976	0.818	0.818	-0.001	-0.011	-0.01	none			SL002561	PTHrP	P12272	5744	PTHLH
4906-35_1	Coagulation Factor V	1097	0.04	0.958	0.741	0.844	0.939	0.793	0.018	-0.006	-0.024	none			SL000622	Coagulation Factor V	P12259	2153	F5
2878-66_2	Proto-oncogene tyrosine-protein kinase Yes	1098	0.04	0.962	0.743	0.996	0.846	0.747	0.001	-0.033	-0.034	none			SL006372	YES	P07947	7525	YES1
2575-5_5	Leptin	1099	0.04	0.963	0.743	0.832	0.733	0.972	0.017	0.02	0.003	none			SL000498	Leptin	P41159	3952	LEP
3350-53_2	Calcium-calmodulin-dependent protein kinase II alpha	1100	0.04	0.963	0.743	0.808	0.841	0.961	0.056	0.046	-0.01	none			SL010491	CAMK2A	Q9UQM7	815	CAMK2A
3629-60_4	Myotonic dystrophy protein kinase-like beta	1101	0.04	0.965	0.743	0.756	0.866	0.953	0.009	0.007	-0.002	none			SL006805	MRCKB	Q9Y5S2	9578	CDC42BPB
4931-59_1	Tissue Factor	1102	0.03	0.968	0.745	0.987	0.813	0.805	0.001	-0.012	-0.013	none			SL000024	TF	P13726	2152	F3
2876-74_2	Topoisomerase I	1103	0.03	0.97	0.746	0.892	0.923	0.796	0.003	-0.003	-0.006	none			SL004305	Topoisomerase I	P11387	7150	TOP1
4292-5_3	N-ethylmaleimide-sensitive factor attachment protein alpha	1104	0.03	0.972	0.746	0.921	0.896	0.814	0.033	-0.042	-0.075	none			SL011202	SNAA	P54920	8775	NAPA
2975-19_2	Connective tissue growth factor	1105	0.03	0.972	0.746	0.857	0.976	0.817	0.023	-0.005	-0.028	none			SL002655	CTGF	P29279	1490	CTGF
4983-6_1	Endoplasmic reticulum resident protein 29	1106	0.03	0.973	0.746	0.827	0.917	0.897	0.058	0.031	-0.027	none			SL003522	ERP29	P30040	10961	ERP29
4976-57_1	Adaptor protein Crk-I	1107	0.03	0.975	0.747	0.881	0.848	0.925	0.041	0.064	0.023	none			SL013240	CRK	P46108	1398	CRK
4496-60_2	Matrix metalloproteinase 12/Macrophage metalloelastase	1108	0.02	0.977	0.747	0.745	0.987	0.869	0.029	-0.003	-0.032	none			SL000522	MMP-12	P39900	4321	MMP12
3189-61_2	Enterokinase	1109	0.02	0.977	0.747	0.924	0.917	0.823	-0.007	0.009	0.016	none			SL010372	Enterokinase	P98073	5651	PRSS7
3620-67_1	Interleukin-22 receptor alpha-1	1110	0.02	0.98	0.748	0.893	0.948	0.855	-0.007	0.004	0.011	none			SL007806	IL22RA1	Q8N6P7	58985	IL22RA1
3197-70_2	Insulin-degrading enzyme	1111	0.02	0.981	0.748	0.878	0.984	0.828	-0.018	0.003	0.021	none			SL007122	IDE	P14735	3416	IDE
2447-7_4	Phospholipase A2, Group IIE	1112	0.02	0.982	0.748	0.871	0.875	0.977	0.006	0.007	0.001	none			SL004066	GIIE	Q9NZK7	30814	PLA2G2E
4138-25_2	Interleukin-20	1113	0.02	0.983	0.748	0.904	0.837	0.951	0.007	0.011	0.004	none			SL004346	IL-20	Q9NYY1	50604	IL20
5248-68_2	Peptidylprolyl isomerase F (Cyclophilin F)	1114	0.02	0.983	0.748	0.941	0.88	0.857	0.026	0.06	0.034	none			SL005793	Cyclophilin F	P30405	10105	PPIF
4534-10_2	Brain-specific serine protease 4	1115	0.02	0.983	0.748	0.876	0.881	0.931	-0.01	-0.02	-0.01	none			SL012822	BSSP4	Q9GZN4	64063	PRSS22
3390-72_2	Phosphoinositide-3-kinase catalytic alpha polypeptide:regulatory subunit 1alpha complex	1116	0.01	0.986	0.749	0.881	0.9	0.985	0.021	0.024	0.003	none			SL010512	PIK3CA/PIK3R1	P42336 P27986	5290 5295	PIK3CA PIK3R1
2652-15_1	Urokinase plasminogen activator surface receptor	1117	0.01	0.989	0.749	0.944	0.845	0.941	-0.004	-0.008	-0.004	none			SL002506	suPAR	Q03405	5329	PLAUR
3887-90_2	Importin beta1	1118	0.01	0.989	0.749	0.89	0.918	0.985	-0.041	-0.036	0.005	none			SL010927	IMB1	Q14974	3837	KPNB1
4124-24_2	Hsp70	1119	0.01	0.989	0.749	0.887	0.951	0.934	-0.036	-0.019	0.018	none			SL000451	HSP 70	P08107	3303	HSPA1A
3078-1_2	Placenta growth factor	1120	0.01	0.989	0.749	0.997	0.859	0.9	0	0.01	0.011	none			SL002640	PlGF	P49763	5228	PGF
3836-51_2	Ubiquitin-fold modifier 1	1121	0.01	0.991	0.75	0.904	0.99	0.902	0.03	0.004	-0.026	none			SL010528	UFM1	P61960	51569	UFM1
2822-56_2	CD97	1122	0.01	0.993	0.75	0.983	0.919	0.912	-0.001	0.005	0.006	none			SL004726	CD97	P48960	976	CD97
4126-22_1	Bactericidal permeability-increasing protein	1123	0.01	0.995	0.75	0.941	0.939	0.979	0.005	0.006	0.001	none			SL004511	BPI	P17213	671	BPI
4194-26_3	Acidic leucine-rich nuclear phosphoprotein 32 family member B	1124	0	0.995	0.75	0.936	0.998	0.926	0.009	0	-0.009	none			SL011769	AN32B	Q92688	10541	ANP32B
2850-3_2	Arginase-1	1125	0	0.996	0.75	0.935	0.92	0.996	-0.006	-0.006	0	none			SL008008	ARGI1	P05089	383	ARG1
5340-24_3	Caspase 10, apoptosis-related cysteine peptidase	1126	0	0.997	0.75	0.953	0.947	0.978	0.011	0.015	0.004	none			SL003717	Caspase-10	Q92851	843	CASP10
4452-9_2	Leucine-rich repeat transmembrane neuronal protein 1	1127	0	0.997	0.75	0.978	0.964	0.941	0.004	-0.008	-0.012	none			SL014096	LRRT1	Q86UE6	347730	LRRTM1
2647-66_2	Rab GDP dissociation inhibitor beta	1128	0	0.997	0.75	0.965	0.982	0.937	0.008	-0.006	-0.014	none			SL003648	Rab GDP dissociation inhibitor beta	P50395	2665	GDI2

## Sheet: Sheet1
		ANOVA				Pair-Wise t-tests						t-test significance
						Pr > t			log2(mean group1/mean group 2)			annotation at p<0.00225
SeqId	Full_Name	Rank	F Value	Pr > F	q	8m-18m	8m-24m	18m-24m	8m/18m	8m/24m	18m/24m	pair1	pair2	pair3	SomaId	Target	UniProt	EntrezGeneID	EntrezGeneSymbol
3212-30_3	Neutral ceramidase	1	46.49	8.3e-09	7.04e-06	0.00121	7.56e-09	5.89e-05	-0.179	-0.435	-0.256	8m-18m	8m-24m	18m-24m	SL010375	ASAH2	Q9NR71	56624	ASAH2
5236-2_3	NR1D1/nuclear receptor subfamily 1, group D, member 1	2	38.4	4.68e-08	1.33e-05	0.000211	4.83e-08	0.00111	-0.244	-0.472	-0.228	8m-18m	8m-24m	18m-24m	SL007145	NR1D1	P20393	9572	NR1D1
3726-62_4	Parathyroid hormone	3	37.55	5.7e-08	1.33e-05	0.000671	1.27e-08	0.000772	-0.286	-0.555	-0.269	8m-18m	8m-24m	18m-24m	SL003970	PTH	P01270	5741	PTH
3083-71_1	X-linked ectodysplasin-A2 receptor	4	37.13	6.29e-08	1.33e-05	0.000291	2.75e-08	0.0013	-0.458	-0.924	-0.466	8m-18m	8m-24m	18m-24m	SL005233	XEDAR	Q9HAV5	60401	EDA2R
2765-4_3	Growth-differentiation factor 11	5	28.72	5.58e-07	9.47e-05	0.000854	3.9e-06	0.000954	0.35	0.692	0.342	8m-18m	8m-24m	18m-24m	SL004345	GDF-11	O95390	10220	GDF11
4322-28_3	Amnionless	6	27.97	6.94e-07	9.81e-05	0.00276	1.7e-07	0.00174	-0.191	-0.407	-0.216		8m-24m	18m-24m	SL013489	AMNLS	Q9BXJ7	81693	AMN
3341-33_4	c-abl oncogene 1, non-receptor tyrosine kinase	7	27.34	8.34e-07	0.000101	0.000166	1.46e-06	0.00724	-0.399	-0.748	-0.349	8m-18m	8m-24m		SL006892	ABL1	P00519	25	ABL1
4703-87_2	Tumor necrosis factor ligand superfamily member 1/TNF-beta/Lymphotoxin-alpha	8	26.31	1.14e-06	0.000121	0.000202	1.6e-06	0.0183	-0.446	-0.718	-0.272	8m-18m	8m-24m		SL000597	TNF-b	P01374	4049	LTA
2719-3_4	Granulocyte colony-stimulating factor receptor	9	23.68	2.6e-06	0.000245	0.000149	6.23e-06	0.0155	-0.271	-0.48	-0.209	8m-18m	8m-24m		SL004591	G-CSF-R	Q99062	1441	CSF3R
2851-63_3	Complement C5a	10	21.33	5.76e-06	0.000457	0.00279	2.91e-07	0.0161	-0.141	-0.247	-0.106		8m-24m		SL000320	C5a	P01031	727	C5
3196-6_2	Hyaluronan and proteoglycan link protein 1	11	21.25	5.93e-06	0.000457	0.000166	0.000197	0.597	0.427	0.452	0.025	8m-18m	8m-24m		SL008023	HPLN1	P10915	1404	HAPLN1
4336-2_1	Serum amyloid A	12	19.76	1.01e-05	0.000716	0.000177	1.91e-05	0.0301	-0.284	-0.497	-0.213	8m-18m	8m-24m		SL000572	SAA	P0DJI8	6288	SAA1
5076-53_2	EPH receptor A10	13	18.82	1.44e-05	0.00094	0.00476	1.61e-05	0.00756	0.148	0.269	0.121		8m-24m		SL014294	EPHAA	Q5JZY3	284656	EPHA10
5085-18_3	Interleukin-20 receptor subunit alpha	14	18.61	1.56e-05	0.000944	0.00116	3.19e-05	0.0176	-0.173	-0.312	-0.139	8m-18m	8m-24m		SL005181	IL-20 Ra	Q9UHF4	53832	IL20RA
3057-55_1	WNT1-inducible-signaling pathway protein 1	15	17.42	2.48e-05	0.0014	0.00303	6.01e-05	0.0162	0.337	0.534	0.197		8m-24m		SL004689	WISP-1	O95388	8840	WISP1
3292-75_1	CD48	16	16.61	3.44e-05	0.00183	0.000111	0.000199	0.158	0.077	0.105	0.028	8m-18m	8m-24m		SL010450	CD48	P09326	962	CD48
5308-89_2	Neutrophil elastase	17	15.15	6.35e-05	0.00317	0.00439	1.63e-05	0.0585	0.121	0.191	0.069		8m-24m		SL000401	Elastase	P08246	1991	ELANE
2974-61_2	Contactin-1	18	14.85	7.23e-05	0.00341	0.00685	0.00012	0.0146	0.217	0.413	0.196		8m-24m		SL004855	contactin-1	Q12860	1272	CNTN1
4252-33_4	Nucleoside diphosphate kinase A	19	13.49	0.000133	0.00593	0.0142	0.000407	0.00773	-0.231	-0.532	-0.302		8m-24m		SL003687	Nucleoside diphosphate kinase A	P15531	4830	NME1
3376-49_2	Interleukin-17 receptor D	20	12.07	0.00026	0.011	0.0762	0.000175	0.00499	-0.052	-0.131	-0.079		8m-24m		SL010613	IL-17 RD	Q8NFM7	54756	IL17RD
2687-2_1	Melanoma Inhibitory Activity	21	11.88	0.000285	0.0115	0.0133	0.000157	0.0403	0.368	0.657	0.289		8m-24m		SL001947	MIA	Q16674	8190	MIA
4695-49_2	alpha-S1-casein	22	10.76	0.000502	0.0187	0.00342	0.000333	0.117	-0.215	-0.351	-0.137		8m-24m		SL001868	CASA	P47710	1446	CSN1S1
3823-9_1	Megakaryocyte-associated tyrosine-protein kinase	23	10.74	0.000508	0.0187	0.00249	0.000533	0.197	0.135	0.193	0.058		8m-24m		SL010505	MATK	P42679	4145	MATK
4995-16_1	15-hydroxyprostaglandin dehydrogenase [NAD+]	24	10.57	0.000555	0.0196	0.000362	0.00209	0.182	-0.197	-0.287	-0.09	8m-18m	8m-24m		SL003930	HPG-	P15428	3248	HPGD
4278-14_3	Protein disulfide-isomerase	25	10.49	0.00058	0.0197	0.0678	0.000249	0.0134	0.135	0.309	0.174		8m-24m		SL004901	Protein disulfide-isomerase	P07237	5034	P4HB
4232-19_2	Insulin-like growth factor I receptor	26	10.2	0.000673	0.022	0.427	0.00224	0.000829	-0.072	0.304	0.376		8m-24m	18m-24m	SL003304	IGF-I sR	P08069	3480	IGF1R
5227-60_3	Pyruvate dehydrogenase kinase, isozyme 1	27	10.09	0.000714	0.0224	0.0726	0.000112	0.0245	0.05	0.124	0.073		8m-24m		SL006921	PDK1	Q15118	5163	PDK1
5073-30_2	Death receptor 3 (DR3)/TNFRSF25	28	9.96	0.000768	0.0225	0.00059	0.00268	0.32	1.003	1.311	0.308	8m-18m			SL004791	DR3	Q93038	8718	TNFRSF25
4964-67_1	Endoplasmic reticulum aminopeptidase 1	29	9.95	0.00077	0.0225	0.0611	0.00102	0.0115	-0.116	-0.275	-0.159		8m-24m		SL007729	ARTS1	Q9NZ08	51752	ERAP1
3804-66_2	Dentin matrix protein 1	30	9.51	0.000976	0.0276	0.0555	6.73e-05	0.0447	-0.123	-0.27	-0.147		8m-24m		SL007403	DMP1	Q13316	1758	DMP1
2968-61_1	Tumor necrosis factor ligand superfamily member 15	31	9.09	0.00123	0.0338	0.719	0.00423	0.00185	-0.009	-0.113	-0.103			18m-24m	SL004686	TNFSF15	O95150	9966	TNFSF15
3798-71_1	Carbonic anhydrase IX	32	8.68	0.00156	0.0412	0.253	0.000532	0.00464	0.068	0.211	0.143		8m-24m		SL005508	Carbonic anhydrase 9	Q16790	768	CA9
4129-72_1	Complement factor B	33	8.44	0.00179	0.0459	0.0384	0.00198	0.0367	0.134	0.232	0.097		8m-24m		SL000414	Factor B	P00751	629	CFB
5107-7_2	Notch 1	34	8.26	0.00198	0.0493	0.0861	0.00123	0.02	0.171	0.362	0.191		8m-24m		SL005703	Notch 1	P46531	4851	NOTCH1
2788-55_1	Matrix metalloproteinase 3/Stromelysin 1	35	8.21	0.00203	0.0493	0.128	0.000904	0.0159	-0.062	-0.148	-0.086		8m-24m		SL000524	MMP-3	P08254	4314	MMP3
4540-11_2	Chromobox protein homolog 5	36	7.96	0.00236	0.0556	0.0199	0.000924	0.183	-0.091	-0.137	-0.046		8m-24m		SL009768	CBX5	P45973	23468	CBX5
4915-64_2	Hemoglobin	38	7.75	0.00267	0.0596	0.0021	0.0463	0.14	2.015	1.473	-0.542	8m-18m			SL000836	Hemoglobin	P69905 P68871	3039 3043	HBA1 HBB
4280-47_2	Proteasome subunit alpha2	40	7.46	0.00318	0.0674	0.0701	0.00136	0.0552	-0.077	-0.173	-0.096		8m-24m		SL008865	PSA2	P25787	5683	PSMA2
4867-15_2	Vascular endothelial growth factor A, secreted splice variant	41	7.39	0.00333	0.0689	0.467	0.0192	0.002	0.02	-0.089	-0.109			18m-24m	SL003310	VEGF121	P15692	7422	VEGFA
2917-3_2	Osteoprotegerin ligand/TRANCE	42	7.33	0.00344	0.0695	0.0855	1.02e-05	0.106	-0.141	-0.276	-0.135		8m-24m		SL002541	sRANKL	O14788	8600	TNFSF11
2848-2_2	Wnt inhibitory factor 1	43	7.25	0.00362	0.0713	0.0789	0.000551	0.0723	0.092	0.18	0.088		8m-24m		SL004652	WIF-1	Q9Y5W5	11197	WIF1
3535-84_1	Dickkopf-related protein 1	44	6.99	0.00425	0.0809	0.0177	0.000326	0.537	0.346	0.423	0.077		8m-24m		SL004367	DKK1	O94907	22943	DKK1
2860-19_2	Karyopherin alpha 2 (RAG cohort 1, importin alpha1)	47	6.85	0.00464	0.0838	0.00212	0.00978	0.831	-0.204	-0.218	-0.014	8m-18m			SL004718	Karyopherin-a2	P52292	3838	KPNA2
2741-22_2	Siglec-6	48	6.74	0.00496	0.0865	0.292	0.000661	0.0357	-0.107	-0.382	-0.275		8m-24m		SL005217	Siglec-6	O43699	946	SIGLEC6
4815-25_3	Thioredoxin domain-containing protein 12	53	6.59	0.00545	0.0865	0.000637	0.0138	0.695	-0.295	-0.255	0.04	8m-18m			SL016128	TXD12	O95881	51060	TXNDC12
4965-27_1	ATP synthase beta-subunit, mitochondrial	54	6.58	0.00551	0.0865	0.000567	0.0125	0.0775	-0.155	-0.364	-0.209	8m-18m			SL005675	ATP synthase beta chain	P06576	506	ATP5B
3340-53_1	Thrombospondin-4	55	6.51	0.00575	0.0887	0.156	0.00159	0.0495	0.157	0.405	0.248		8m-24m		SL007207	TSP4	P35443	7060	THBS4
4428-1_2	Carbohydrate sulfotransferase 2	58	6.25	0.00678	0.0991	0.00152	0.00882	0.872	-0.444	-0.471	-0.027	8m-18m			SL013988	CHST2	Q9Y4C5	9435	CHST2
3220-40_2	Proto-oncogene tyrosine-protein kinase receptor Ret	63	5.64	0.0101	0.136	0.709	0.00169	0.0221	-0.016	-0.126	-0.111		8m-24m		SL010378	RET	P07949	5979	RET
3037-62_1	Interleukin-1beta	69	5.36	0.0123	0.151	0.129	0.00129	0.124	0.108	0.215	0.107		8m-24m		SL001795	IL-1b	P01584	3553	IL1B
3320-49_2	Insulin-like growth factor-binding protein 7	71	5.21	0.0136	0.162	0.0502	0.000994	0.337	-0.133	-0.2	-0.067		8m-24m		SL005087	IGFBP-7	Q16270	3490	IGFBP7
3809-1_2	Fibroblast growth factor receptor 3	75	4.78	0.0184	0.203	0.00102	0.0226	0.207	-0.266	-0.514	-0.247	8m-18m			SL004063	FGFR-3	P22607	2261	FGFR3
2823-7_1	COMM domain containing 7	81	4.44	0.0233	0.244	0.000552	0.0676	0.751	-0.127	-0.111	0.016	8m-18m			SL004704	COMMD7	Q86VX2	149951	COMMD7
4834-61_2	Ephrin type-A receptor 2	86	4.22	0.0275	0.267	0.833	0.00122	0.0396	0.01	0.108	0.098		8m-24m		SL002654	Epithelial cell kinase	P29317	1969	EPHA2
3343-1_4	Aminoacylase-1	102	3.89	0.035	0.287	0.000994	0.142	0.457	-0.547	-0.381	0.166	8m-18m			SL005574	Aminoacylase-1	Q03154	95	ACY1
3073-51_2	Interleukin-18 binding protein	162	2.96	0.0717	0.374	0.00187	0.143	0.696	-0.267	-0.215	0.052	8m-18m			SL002508	IL-18 BPa	O95998	10068	IL18BP
											Total Count	23	44	9
											Higher Grp 1	5/8 months	20/8 months	2/18 months
											Higher Grp 2	18/18 months	24/24 months	7/24 months
Higher in 8 months as compared to 18 months		Group 1
SeqId	Full_Name	Rank	F Value	Pr > F	q	8m-18m	8m-24m	18m-24m	8m/18m	8m/24m	18m/24m	pair1	pair2	pair3	SomaId	Target	UniProt	EntrezGeneID	EntrezGeneSymbol
2765-4_3	Growth-differentiation factor 11	5	28.72	5.58e-07	9.47e-05	0.000854	3.9e-06	0.000954	0.35	0.692	0.342	8m-18m	8m-24m	18m-24m	SL004345	GDF-11	O95390	10220	GDF11
3196-6_2	Hyaluronan and proteoglycan link protein 1	11	21.25	5.93e-06	0.000457	0.000166	0.000197	0.597	0.427	0.452	0.025	8m-18m	8m-24m		SL008023	HPLN1	P10915	1404	HAPLN1
3292-75_1	CD48	16	16.61	3.44e-05	0.00183	0.000111	0.000199	0.158	0.077	0.105	0.028	8m-18m	8m-24m		SL010450	CD48	P09326	962	CD48
5073-30_2	Death receptor 3 (DR3)/TNFRSF25	28	9.96	0.000768	0.0225	0.00059	0.00268	0.32	1.003	1.311	0.308	8m-18m			SL004791	DR3	Q93038	8718	TNFRSF25
4915-64_2	Hemoglobin	38	7.75	0.00267	0.0596	0.0021	0.0463	0.14	2.015	1.473	-0.542	8m-18m			SL000836	Hemoglobin	P69905 P68871	3039 3043	HBA1 HBB
Higher in 18 months as compared to 8 months		Group 2
SeqId	Full_Name	Rank	F Value	Pr > F	q	8m-18m	8m-24m	18m-24m	8m/18m	8m/24m	18m/24m	pair1	pair2	pair3	SomaId	Target	UniProt	EntrezGeneID	EntrezGeneSymbol
3212-30_3	Neutral ceramidase	1	46.49	8.3e-09	7.04e-06	0.00121	7.56e-09	5.89e-05	-0.179	-0.435	-0.256	8m-18m	8m-24m	18m-24m	SL010375	ASAH2	Q9NR71	56624	ASAH2
5236-2_3	NR1D1/nuclear receptor subfamily 1, group D, member 1	2	38.4	4.68e-08	1.33e-05	0.000211	4.83e-08	0.00111	-0.244	-0.472	-0.228	8m-18m	8m-24m	18m-24m	SL007145	NR1D1	P20393	9572	NR1D1
3726-62_4	Parathyroid hormone	3	37.55	5.7e-08	1.33e-05	0.000671	1.27e-08	0.000772	-0.286	-0.555	-0.269	8m-18m	8m-24m	18m-24m	SL003970	PTH	P01270	5741	PTH
3083-71_1	X-linked ectodysplasin-A2 receptor	4	37.13	6.29e-08	1.33e-05	0.000291	2.75e-08	0.0013	-0.458	-0.924	-0.466	8m-18m	8m-24m	18m-24m	SL005233	XEDAR	Q9HAV5	60401	EDA2R
3341-33_4	c-abl oncogene 1, non-receptor tyrosine kinase	7	27.34	8.34e-07	0.000101	0.000166	1.46e-06	0.00724	-0.399	-0.748	-0.349	8m-18m	8m-24m		SL006892	ABL1	P00519	25	ABL1
4703-87_2	Tumor necrosis factor ligand superfamily member 1/TNF-beta/Lymphotoxin-alpha	8	26.31	1.14e-06	0.000121	0.000202	1.6e-06	0.0183	-0.446	-0.718	-0.272	8m-18m	8m-24m		SL000597	TNF-b	P01374	4049	LTA
2719-3_4	Granulocyte colony-stimulating factor receptor	9	23.68	2.6e-06	0.000245	0.000149	6.23e-06	0.0155	-0.271	-0.48	-0.209	8m-18m	8m-24m		SL004591	G-CSF-R	Q99062	1441	CSF3R
4336-2_1	Serum amyloid A	12	19.76	1.01e-05	0.000716	0.000177	1.91e-05	0.0301	-0.284	-0.497	-0.213	8m-18m	8m-24m		SL000572	SAA	P0DJI8	6288	SAA1
5085-18_3	Interleukin-20 receptor subunit alpha	14	18.61	1.56e-05	0.000944	0.00116	3.19e-05	0.0176	-0.173	-0.312	-0.139	8m-18m	8m-24m		SL005181	IL-20 Ra	Q9UHF4	53832	IL20RA
4995-16_1	15-hydroxyprostaglandin dehydrogenase [NAD+]	24	10.57	0.000555	0.0196	0.000362	0.00209	0.182	-0.197	-0.287	-0.09	8m-18m	8m-24m		SL003930	HPG-	P15428	3248	HPGD
2860-19_2	Karyopherin alpha 2 (RAG cohort 1, importin alpha1)	47	6.85	0.00464	0.0838	0.00212	0.00978	0.831	-0.204	-0.218	-0.014	8m-18m			SL004718	Karyopherin-a2	P52292	3838	KPNA2
4815-25_3	Thioredoxin domain-containing protein 12	53	6.59	0.00545	0.0865	0.000637	0.0138	0.695	-0.295	-0.255	0.04	8m-18m			SL016128	TXD12	O95881	51060	TXNDC12
4965-27_1	ATP synthase beta-subunit, mitochondrial	54	6.58	0.00551	0.0865	0.000567	0.0125	0.0775	-0.155	-0.364	-0.209	8m-18m			SL005675	ATP synthase beta chain	P06576	506	ATP5B
4428-1_2	Carbohydrate sulfotransferase 2	58	6.25	0.00678	0.0991	0.00152	0.00882	0.872	-0.444	-0.471	-0.027	8m-18m			SL013988	CHST2	Q9Y4C5	9435	CHST2
3809-1_2	Fibroblast growth factor receptor 3	75	4.78	0.0184	0.203	0.00102	0.0226	0.207	-0.266	-0.514	-0.247	8m-18m			SL004063	FGFR-3	P22607	2261	FGFR3
2823-7_1	COMM domain containing 7	81	4.44	0.0233	0.244	0.000552	0.0676	0.751	-0.127	-0.111	0.016	8m-18m			SL004704	COMMD7	Q86VX2	149951	COMMD7
3343-1_4	Aminoacylase-1	102	3.89	0.035	0.287	0.000994	0.142	0.457	-0.547	-0.381	0.166	8m-18m			SL005574	Aminoacylase-1	Q03154	95	ACY1
3073-51_2	Interleukin-18 binding protein	162	2.96	0.0717	0.374	0.00187	0.143	0.696	-0.267	-0.215	0.052	8m-18m			SL002508	IL-18 BPa	O95998	10068	IL18BP
Higher in 8 months as compared to 24 months		Group 3
SeqId	Full_Name	Rank	F Value	Pr > F	q	8m-18m	8m-24m	18m-24m	8m/18m	8m/24m	18m/24m	pair1	pair2	pair3	SomaId	Target	UniProt	EntrezGeneID	EntrezGeneSymbol
2765-4_3	Growth-differentiation factor 11	5	28.72	5.58e-07	9.47e-05	0.000854	3.9e-06	0.000954	0.35	0.692	0.342	8m-18m	8m-24m	18m-24m	SL004345	GDF-11	O95390	10220	GDF11
3196-6_2	Hyaluronan and proteoglycan link protein 1	11	21.25	5.93e-06	0.000457	0.000166	0.000197	0.597	0.427	0.452	0.025	8m-18m	8m-24m		SL008023	HPLN1	P10915	1404	HAPLN1
5076-53_2	EPH receptor A10	13	18.82	1.44e-05	0.00094	0.00476	1.61e-05	0.00756	0.148	0.269	0.121		8m-24m		SL014294	EPHAA	Q5JZY3	284656	EPHA10
3057-55_1	WNT1-inducible-signaling pathway protein 1	15	17.42	2.48e-05	0.0014	0.00303	6.01e-05	0.0162	0.337	0.534	0.197		8m-24m		SL004689	WISP-1	O95388	8840	WISP1
3292-75_1	CD48	16	16.61	3.44e-05	0.00183	0.000111	0.000199	0.158	0.077	0.105	0.028	8m-18m	8m-24m		SL010450	CD48	P09326	962	CD48
5308-89_2	Neutrophil elastase	17	15.15	6.35e-05	0.00317	0.00439	1.63e-05	0.0585	0.121	0.191	0.069		8m-24m		SL000401	Elastase	P08246	1991	ELANE
2974-61_2	Contactin-1	18	14.85	7.23e-05	0.00341	0.00685	0.00012	0.0146	0.217	0.413	0.196		8m-24m		SL004855	contactin-1	Q12860	1272	CNTN1
2687-2_1	Melanoma Inhibitory Activity	21	11.88	0.000285	0.0115	0.0133	0.000157	0.0403	0.368	0.657	0.289		8m-24m		SL001947	MIA	Q16674	8190	MIA
3823-9_1	Megakaryocyte-associated tyrosine-protein kinase	23	10.74	0.000508	0.0187	0.00249	0.000533	0.197	0.135	0.193	0.058		8m-24m		SL010505	MATK	P42679	4145	MATK
4278-14_3	Protein disulfide-isomerase	25	10.49	0.00058	0.0197	0.0678	0.000249	0.0134	0.135	0.309	0.174		8m-24m		SL004901	Protein disulfide-isomerase	P07237	5034	P4HB
4232-19_2	Insulin-like growth factor I receptor	26	10.2	0.000673	0.022	0.427	0.00224	0.000829	-0.072	0.304	0.376		8m-24m	18m-24m	SL003304	IGF-I sR	P08069	3480	IGF1R
5227-60_3	Pyruvate dehydrogenase kinase, isozyme 1	27	10.09	0.000714	0.0224	0.0726	0.000112	0.0245	0.05	0.124	0.073		8m-24m		SL006921	PDK1	Q15118	5163	PDK1
3798-71_1	Carbonic anhydrase IX	32	8.68	0.00156	0.0412	0.253	0.000532	0.00464	0.068	0.211	0.143		8m-24m		SL005508	Carbonic anhydrase 9	Q16790	768	CA9
4129-72_1	Complement factor B	33	8.44	0.00179	0.0459	0.0384	0.00198	0.0367	0.134	0.232	0.097		8m-24m		SL000414	Factor B	P00751	629	CFB
5107-7_2	Notch 1	34	8.26	0.00198	0.0493	0.0861	0.00123	0.02	0.171	0.362	0.191		8m-24m		SL005703	Notch 1	P46531	4851	NOTCH1
2848-2_2	Wnt inhibitory factor 1	43	7.25	0.00362	0.0713	0.0789	0.000551	0.0723	0.092	0.18	0.088		8m-24m		SL004652	WIF-1	Q9Y5W5	11197	WIF1
3535-84_1	Dickkopf-related protein 1	44	6.99	0.00425	0.0809	0.0177	0.000326	0.537	0.346	0.423	0.077		8m-24m		SL004367	DKK1	O94907	22943	DKK1
3340-53_1	Thrombospondin-4	55	6.51	0.00575	0.0887	0.156	0.00159	0.0495	0.157	0.405	0.248		8m-24m		SL007207	TSP4	P35443	7060	THBS4
3037-62_1	Interleukin-1beta	69	5.36	0.0123	0.151	0.129	0.00129	0.124	0.108	0.215	0.107		8m-24m		SL001795	IL-1b	P01584	3553	IL1B
4834-61_2	Ephrin type-A receptor 2	86	4.22	0.0275	0.267	0.833	0.00122	0.0396	0.01	0.108	0.098		8m-24m		SL002654	Epithelial cell kinase	P29317	1969	EPHA2
Higher in 24 months as compared to 8 months		Group 4
SeqId	Full_Name	Rank	F Value	Pr > F	q	8m-18m	8m-24m	18m-24m	8m/18m	8m/24m	18m/24m	pair1	pair2	pair3	SomaId	Target	UniProt	EntrezGeneID	EntrezGeneSymbol
3212-30_3	Neutral ceramidase	1	46.49	8.3e-09	7.04e-06	0.00121	7.56e-09	5.89e-05	-0.179	-0.435	-0.256	8m-18m	8m-24m	18m-24m	SL010375	ASAH2	Q9NR71	56624	ASAH2
5236-2_3	NR1D1/nuclear receptor subfamily 1, group D, member 1	2	38.4	4.68e-08	1.33e-05	0.000211	4.83e-08	0.00111	-0.244	-0.472	-0.228	8m-18m	8m-24m	18m-24m	SL007145	NR1D1	P20393	9572	NR1D1
3726-62_4	Parathyroid hormone	3	37.55	5.7e-08	1.33e-05	0.000671	1.27e-08	0.000772	-0.286	-0.555	-0.269	8m-18m	8m-24m	18m-24m	SL003970	PTH	P01270	5741	PTH
3083-71_1	X-linked ectodysplasin-A2 receptor	4	37.13	6.29e-08	1.33e-05	0.000291	2.75e-08	0.0013	-0.458	-0.924	-0.466	8m-18m	8m-24m	18m-24m	SL005233	XEDAR	Q9HAV5	60401	EDA2R
4322-28_3	Amnionless	6	27.97	6.94e-07	9.81e-05	0.00276	1.7e-07	0.00174	-0.191	-0.407	-0.216		8m-24m	18m-24m	SL013489	AMNLS	Q9BXJ7	81693	AMN
3341-33_4	c-abl oncogene 1, non-receptor tyrosine kinase	7	27.34	8.34e-07	0.000101	0.000166	1.46e-06	0.00724	-0.399	-0.748	-0.349	8m-18m	8m-24m		SL006892	ABL1	P00519	25	ABL1
4703-87_2	Tumor necrosis factor ligand superfamily member 1/TNF-beta/Lymphotoxin-alpha	8	26.31	1.14e-06	0.000121	0.000202	1.6e-06	0.0183	-0.446	-0.718	-0.272	8m-18m	8m-24m		SL000597	TNF-b	P01374	4049	LTA
2719-3_4	Granulocyte colony-stimulating factor receptor	9	23.68	2.6e-06	0.000245	0.000149	6.23e-06	0.0155	-0.271	-0.48	-0.209	8m-18m	8m-24m		SL004591	G-CSF-R	Q99062	1441	CSF3R
2851-63_3	Complement C5a	10	21.33	5.76e-06	0.000457	0.00279	2.91e-07	0.0161	-0.141	-0.247	-0.106		8m-24m		SL000320	C5a	P01031	727	C5
4336-2_1	Serum amyloid A	12	19.76	1.01e-05	0.000716	0.000177	1.91e-05	0.0301	-0.284	-0.497	-0.213	8m-18m	8m-24m		SL000572	SAA	P0DJI8	6288	SAA1
5085-18_3	Interleukin-20 receptor subunit alpha	14	18.61	1.56e-05	0.000944	0.00116	3.19e-05	0.0176	-0.173	-0.312	-0.139	8m-18m	8m-24m		SL005181	IL-20 Ra	Q9UHF4	53832	IL20RA
4252-33_4	Nucleoside diphosphate kinase A	19	13.49	0.000133	0.00593	0.0142	0.000407	0.00773	-0.231	-0.532	-0.302		8m-24m		SL003687	Nucleoside diphosphate kinase A	P15531	4830	NME1
3376-49_2	Interleukin-17 receptor D	20	12.07	0.00026	0.011	0.0762	0.000175	0.00499	-0.052	-0.131	-0.079		8m-24m		SL010613	IL-17 RD	Q8NFM7	54756	IL17RD
4695-49_2	alpha-S1-casein	22	10.76	0.000502	0.0187	0.00342	0.000333	0.117	-0.215	-0.351	-0.137		8m-24m		SL001868	CASA	P47710	1446	CSN1S1
4995-16_1	15-hydroxyprostaglandin dehydrogenase [NAD+]	24	10.57	0.000555	0.0196	0.000362	0.00209	0.182	-0.197	-0.287	-0.09	8m-18m	8m-24m		SL003930	HPG-	P15428	3248	HPGD
4964-67_1	Endoplasmic reticulum aminopeptidase 1	29	9.95	0.00077	0.0225	0.0611	0.00102	0.0115	-0.116	-0.275	-0.159		8m-24m		SL007729	ARTS1	Q9NZ08	51752	ERAP1
3804-66_2	Dentin matrix protein 1	30	9.51	0.000976	0.0276	0.0555	6.73e-05	0.0447	-0.123	-0.27	-0.147		8m-24m		SL007403	DMP1	Q13316	1758	DMP1
2788-55_1	Matrix metalloproteinase 3/Stromelysin 1	35	8.21	0.00203	0.0493	0.128	0.000904	0.0159	-0.062	-0.148	-0.086		8m-24m		SL000524	MMP-3	P08254	4314	MMP3
4540-11_2	Chromobox protein homolog 5	36	7.96	0.00236	0.0556	0.0199	0.000924	0.183	-0.091	-0.137	-0.046		8m-24m		SL009768	CBX5	P45973	23468	CBX5
4280-47_2	Proteasome subunit alpha2	40	7.46	0.00318	0.0674	0.0701	0.00136	0.0552	-0.077	-0.173	-0.096		8m-24m		SL008865	PSA2	P25787	5683	PSMA2
2917-3_2	Osteoprotegerin ligand/TRANCE	42	7.33	0.00344	0.0695	0.0855	1.02e-05	0.106	-0.141	-0.276	-0.135		8m-24m		SL002541	sRANKL	O14788	8600	TNFSF11
2741-22_2	Siglec-6	48	6.74	0.00496	0.0865	0.292	0.000661	0.0357	-0.107	-0.382	-0.275		8m-24m		SL005217	Siglec-6	O43699	946	SIGLEC6
3220-40_2	Proto-oncogene tyrosine-protein kinase receptor Ret	63	5.64	0.0101	0.136	0.709	0.00169	0.0221	-0.016	-0.126	-0.111		8m-24m		SL010378	RET	P07949	5979	RET
3320-49_2	Insulin-like growth factor-binding protein 7	71	5.21	0.0136	0.162	0.0502	0.000994	0.337	-0.133	-0.2	-0.067		8m-24m		SL005087	IGFBP-7	Q16270	3490	IGFBP7
Higher in 18 months as compared to 24 months		Group 5
SeqId	Full_Name	Rank	F Value	Pr > F	q	8m-18m	8m-24m	18m-24m	8m/18m	8m/24m	18m/24m	pair1	pair2	pair3	SomaId	Target	UniProt	EntrezGeneID	EntrezGeneSymbol
2765-4_3	Growth-differentiation factor 11	5	28.72	5.58e-07	9.47e-05	0.000854	3.9e-06	0.000954	0.35	0.692	0.342	8m-18m	8m-24m	18m-24m	SL004345	GDF-11	O95390	10220	GDF11
4232-19_2	Insulin-like growth factor I receptor	26	10.2	0.000673	0.022	0.427	0.00224	0.000829	-0.072	0.304	0.376		8m-24m	18m-24m	SL003304	IGF-I sR	P08069	3480	IGF1R
Higher in 24 months as compared to 18 months		Group 6
SeqId	Full_Name	Rank	F Value	Pr > F	q	8m-18m	8m-24m	18m-24m	8m/18m	8m/24m	18m/24m	pair1	pair2	pair3	SomaId	Target	UniProt	EntrezGeneID	EntrezGeneSymbol
3212-30_3	Neutral ceramidase	1	46.49	8.3e-09	7.04e-06	0.00121	7.56e-09	5.89e-05	-0.179	-0.435	-0.256	8m-18m	8m-24m	18m-24m	SL010375	ASAH2	Q9NR71	56624	ASAH2
5236-2_3	NR1D1/nuclear receptor subfamily 1, group D, member 1	2	38.4	4.68e-08	1.33e-05	0.000211	4.83e-08	0.00111	-0.244	-0.472	-0.228	8m-18m	8m-24m	18m-24m	SL007145	NR1D1	P20393	9572	NR1D1
3726-62_4	Parathyroid hormone	3	37.55	5.7e-08	1.33e-05	0.000671	1.27e-08	0.000772	-0.286	-0.555	-0.269	8m-18m	8m-24m	18m-24m	SL003970	PTH	P01270	5741	PTH
3083-71_1	X-linked ectodysplasin-A2 receptor	4	37.13	6.29e-08	1.33e-05	0.000291	2.75e-08	0.0013	-0.458	-0.924	-0.466	8m-18m	8m-24m	18m-24m	SL005233	XEDAR	Q9HAV5	60401	EDA2R
4322-28_3	Amnionless	6	27.97	6.94e-07	9.81e-05	0.00276	1.7e-07	0.00174	-0.191	-0.407	-0.216		8m-24m	18m-24m	SL013489	AMNLS	Q9BXJ7	81693	AMN
2968-61_1	Tumor necrosis factor ligand superfamily member 15	31	9.09	0.00123	0.0338	0.719	0.00423	0.00185	-0.009	-0.113	-0.103			18m-24m	SL004686	TNFSF15	O95150	9966	TNFSF15
4867-15_2	Vascular endothelial growth factor A, secreted splice variant	41	7.39	0.00333	0.0689	0.467	0.0192	0.002	0.02	-0.089	-0.109			18m-24m	SL003310	VEGF121	P15692	7422	VEGFA

## Sheet: Group 1
Higher in 8 months as compared to 18 months		Group 1
SeqId	Full_Name	Rank	F Value	Pr > F	q	8m-18m	8m-24m	18m-24m	8m/18m	8m/24m	18m/24m	pair1	pair2	pair3	SomaId	Target	UniProt	EntrezGeneID	EntrezGeneSymbol
2765-4_3	Growth-differentiation factor 11	5	28.72	5.58e-07	9.47e-05	0.000854	3.9e-06	0.000954	0.35	0.692	0.342	8m-18m	8m-24m	18m-24m	SL004345	GDF-11	O95390	10220	GDF11
3196-6_2	Hyaluronan and proteoglycan link protein 1	11	21.25	5.93e-06	0.000457	0.000166	0.000197	0.597	0.427	0.452	0.025	8m-18m	8m-24m		SL008023	HPLN1	P10915	1404	HAPLN1
3292-75_1	CD48	16	16.61	3.44e-05	0.00183	0.000111	0.000199	0.158	0.077	0.105	0.028	8m-18m	8m-24m		SL010450	CD48	P09326	962	CD48
5073-30_2	Death receptor 3 (DR3)/TNFRSF25	28	9.96	0.000768	0.0225	0.00059	0.00268	0.32	1.003	1.311	0.308	8m-18m			SL004791	DR3	Q93038	8718	TNFRSF25
4915-64_2	Hemoglobin	38	7.75	0.00267	0.0596	0.0021	0.0463	0.14	2.015	1.473	-0.542	8m-18m			SL000836	Hemoglobin	P69905 P68871	3039 3043	HBA1 HBB
Reactome Output
Pathway identifier	Pathway name	#Entities found	#Entities total	#Interactors found	#Interactors total	Entities ratio	Entities pValue	Entities FDR	#Reactions found	#Reactions total	Reactions ratio	Species identifier	Species name	Submitted entities found	Mapped entities	Submitted entities hit interactor	Interacts with	Found reaction identifiers
R-HSA-1247673	Erythrocytes take up oxygen and release carbon dioxide	1	8	0	0	0.000809717	0.00309382	0.0231893	1	6	0.000633714	48887	Homo sapiens	HBA1	P69905			R-HSA-1247668
R-HSA-1480926	O2/CO2 exchange in erythrocytes	1	12	0	0	0.00121457	0.00463785	0.0231893	2	13	0.00137305	48887	Homo sapiens	HBA1	P69905			R-HSA-1247668;R-HSA-1237325
R-HSA-1237044	Erythrocytes take up carbon dioxide and release oxygen	1	12	0	0	0.00121457	0.00463785	0.0231893	1	7	0.000739332	48887	Homo sapiens	HBA1	P69905			R-HSA-1237325
R-HSA-5669034	TNFs bind their physiological receptors	1	26	0	25	0.00263158	0.019211	0.057633	1	11	0.00116181	48887	Homo sapiens	TNFRSF25	Q93038			R-HSA-5693012
R-HSA-3000178	ECM proteoglycans	1	75	0	11	0.00759109	0.0324821	0.0776229	1	22	0.00232362	48887	Homo sapiens	HAPLN1	P10915			R-HSA-2318623
R-HSA-5668541	TNFR2 non-canonical NF-kB pathway	1	98	0	53	0.00991903	0.0534168	0.0776229	1	41	0.00433038	48887	Homo sapiens	TNFRSF25	Q93038			R-HSA-5693012
R-HSA-2168880	Scavenging of heme from plasma	1	167	0	11	0.0169028	0.0666823	0.0776229	5	12	0.00126743	48887	Homo sapiens	HBA1	P69905			R-HSA-2168883;R-HSA-2168885;R-HSA-2168884;R-HSA-2230938;R-HSA-2168889
R-HSA-2173782	Binding and Uptake of Ligands by Scavenger Receptors	1	196	0	12	0.0198381	0.0776229	0.0776229	5	32	0.00337981	48887	Homo sapiens	HBA1	P69905			R-HSA-2168883;R-HSA-2168885;R-HSA-2168884;R-HSA-2230938;R-HSA-2168889
R-HSA-202733	Cell surface interactions at the vascular wall	1	103	1	184	0.0104251	0.0999085	0.0999085	1	55	0.00580904	48887	Homo sapiens	CD48	P09326	CD48	Q9BZW8	R-HSA-202722
R-HSA-1474244	Extracellular matrix organization	1	294	0	298	0.0297571	0.200123	0.200123	1	275	0.0290452	48887	Homo sapiens	HAPLN1	P10915			R-HSA-2318623
R-HSA-5653656	Vesicle-mediated transport	1	733	0	388	0.0741903	0.34063	0.34063	5	214	0.0226025	48887	Homo sapiens	HBA1	P69905			R-HSA-2168883;R-HSA-2168885;R-HSA-2168884;R-HSA-2230938;R-HSA-2168889
R-HSA-109582	Hemostasis	1	599	1	724	0.0606275	0.390652	0.390652	1	311	0.0328475	48887	Homo sapiens	CD48	P09326	CD48	Q9BZW8	R-HSA-202722
R-HSA-1280215	Cytokine Signaling in Immune system	1	734	0	825	0.0742915	0.43808	0.43808	1	348	0.0367554	48887	Homo sapiens	TNFRSF25	Q93038			R-HSA-5693012
R-HSA-1430728	Metabolism	1	2031	0	645	0.205567	0.672225	0.672225	2	1890	0.19962	48887	Homo sapiens	HBA1	P69905			R-HSA-1247668;R-HSA-1237325
R-HSA-168256	Immune System	1	1912	0	1850	0.193522	0.773725	0.773725	1	1150	0.121462	48887	Homo sapiens	TNFRSF25	Q93038			R-HSA-5693012
Rat Reactome Output
Pathway identifier	Pathway name	Species name	Submitted entities found	Mapped entities	Found reaction identifiers
R-RNO-1247673	Erythrocytes take up oxygen and release carbon dioxide	Rattus norvegicus	HBA1	P01946	R-RNO-1247668
R-RNO-2168880	Scavenging of heme from plasma	Rattus norvegicus	HBA1	P01946	R-RNO-2168884;R-RNO-2230938;R-RNO-2168889;R-RNO-2168883;R-RNO-2168885
R-RNO-1480926	O2/CO2 exchange in erythrocytes	Rattus norvegicus	HBA1	P01946	R-RNO-1237325;R-RNO-1247668
R-RNO-1237044	Erythrocytes take up carbon dioxide and release oxygen	Rattus norvegicus	HBA1	P01946	R-RNO-1237325
R-RNO-5669034	TNFs bind their physiological receptors	Rattus norvegicus	TNFRSF25	D4ADP7	R-RNO-5693012
R-RNO-2173782	Binding and Uptake of Ligands by Scavenger Receptors	Rattus norvegicus	HBA1	P01946	R-RNO-2168884;R-RNO-2230938;R-RNO-2168889;R-RNO-2168883;R-RNO-2168885
R-RNO-5668541	TNFR2 non-canonical NF-kB pathway	Rattus norvegicus	TNFRSF25	D4ADP7	R-RNO-5693012
R-RNO-202733	Cell surface interactions at the vascular wall	Rattus norvegicus	CD48	P10252	R-RNO-202722
R-RNO-5653656	Vesicle-mediated transport	Rattus norvegicus	HBA1	P01946	R-RNO-2168884;R-RNO-2230938;R-RNO-2168889;R-RNO-2168883;R-RNO-2168885
R-RNO-1280215	Cytokine Signaling in Immune system	Rattus norvegicus	TNFRSF25	D4ADP7	R-RNO-5693012
R-RNO-109582	Hemostasis	Rattus norvegicus	CD48	P10252	R-RNO-202722
R-RNO-168256	Immune System	Rattus norvegicus	TNFRSF25	D4ADP7	R-RNO-5693012
R-RNO-1430728	Metabolism	Rattus norvegicus	HBA1	P01946	R-RNO-1237325;R-RNO-1247668

## Sheet: Group 2
Higher in 18 months as compared to 8 months		Group 2
SeqId	Full_Name	Rank	F Value	Pr > F	q	8m-18m	8m-24m	18m-24m	8m/18m	8m/24m	18m/24m	pair1	pair2	pair3	SomaId	Target	UniProt	EntrezGeneID	EntrezGeneSymbol
3212-30_3	Neutral ceramidase	1	46.49	8.3e-09	7.04e-06	0.00121	7.56e-09	5.89e-05	-0.179	-0.435	-0.256	8m-18m	8m-24m	18m-24m	SL010375	ASAH2	Q9NR71	56624	ASAH2
5236-2_3	NR1D1/nuclear receptor subfamily 1, group D, member 1	2	38.4	4.68e-08	1.33e-05	0.000211	4.83e-08	0.00111	-0.244	-0.472	-0.228	8m-18m	8m-24m	18m-24m	SL007145	NR1D1	P20393	9572	NR1D1
3726-62_4	Parathyroid hormone	3	37.55	5.7e-08	1.33e-05	0.000671	1.27e-08	0.000772	-0.286	-0.555	-0.269	8m-18m	8m-24m	18m-24m	SL003970	PTH	P01270	5741	PTH
3083-71_1	X-linked ectodysplasin-A2 receptor	4	37.13	6.29e-08	1.33e-05	0.000291	2.75e-08	0.0013	-0.458	-0.924	-0.466	8m-18m	8m-24m	18m-24m	SL005233	XEDAR	Q9HAV5	60401	EDA2R
3341-33_4	c-abl oncogene 1, non-receptor tyrosine kinase	7	27.34	8.34e-07	0.000101	0.000166	1.46e-06	0.00724	-0.399	-0.748	-0.349	8m-18m	8m-24m		SL006892	ABL1	P00519	25	ABL1
4703-87_2	Tumor necrosis factor ligand superfamily member 1/TNF-beta/Lymphotoxin-alpha	8	26.31	1.14e-06	0.000121	0.000202	1.6e-06	0.0183	-0.446	-0.718	-0.272	8m-18m	8m-24m		SL000597	TNF-b	P01374	4049	LTA
2719-3_4	Granulocyte colony-stimulating factor receptor	9	23.68	2.6e-06	0.000245	0.000149	6.23e-06	0.0155	-0.271	-0.48	-0.209	8m-18m	8m-24m		SL004591	G-CSF-R	Q99062	1441	CSF3R
4336-2_1	Serum amyloid A	12	19.76	1.01e-05	0.000716	0.000177	1.91e-05	0.0301	-0.284	-0.497	-0.213	8m-18m	8m-24m		SL000572	SAA	P0DJI8	6288	SAA1
5085-18_3	Interleukin-20 receptor subunit alpha	14	18.61	1.56e-05	0.000944	0.00116	3.19e-05	0.0176	-0.173	-0.312	-0.139	8m-18m	8m-24m		SL005181	IL-20 Ra	Q9UHF4	53832	IL20RA
4995-16_1	15-hydroxyprostaglandin dehydrogenase [NAD+]	24	10.57	0.000555	0.0196	0.000362	0.00209	0.182	-0.197	-0.287	-0.09	8m-18m	8m-24m		SL003930	HPG-	P15428	3248	HPGD
2860-19_2	Karyopherin alpha 2 (RAG cohort 1, importin alpha1)	47	6.85	0.00464	0.0838	0.00212	0.00978	0.831	-0.204	-0.218	-0.014	8m-18m			SL004718	Karyopherin-a2	P52292	3838	KPNA2
4815-25_3	Thioredoxin domain-containing protein 12	53	6.59	0.00545	0.0865	0.000637	0.0138	0.695	-0.295	-0.255	0.04	8m-18m			SL016128	TXD12	O95881	51060	TXNDC12
4965-27_1	ATP synthase beta-subunit, mitochondrial	54	6.58	0.00551	0.0865	0.000567	0.0125	0.0775	-0.155	-0.364	-0.209	8m-18m			SL005675	ATP synthase beta chain	P06576	506	ATP5B
4428-1_2	Carbohydrate sulfotransferase 2	58	6.25	0.00678	0.0991	0.00152	0.00882	0.872	-0.444	-0.471	-0.027	8m-18m			SL013988	CHST2	Q9Y4C5	9435	CHST2
3809-1_2	Fibroblast growth factor receptor 3	75	4.78	0.0184	0.203	0.00102	0.0226	0.207	-0.266	-0.514	-0.247	8m-18m			SL004063	FGFR-3	P22607	2261	FGFR3
2823-7_1	COMM domain containing 7	81	4.44	0.0233	0.244	0.000552	0.0676	0.751	-0.127	-0.111	0.016	8m-18m			SL004704	COMMD7	Q86VX2	149951	COMMD7
3343-1_4	Aminoacylase-1	102	3.89	0.035	0.287	0.000994	0.142	0.457	-0.547	-0.381	0.166	8m-18m			SL005574	Aminoacylase-1	Q03154	95	ACY1
3073-51_2	Interleukin-18 binding protein	162	2.96	0.0717	0.374	0.00187	0.143	0.696	-0.267	-0.215	0.052	8m-18m			SL002508	IL-18 BPa	O95998	10068	IL18BP
Reactome Output
Pathway identifier	Pathway name	#Entities found	#Entities total	#Interactors found	#Interactors total	Entities ratio	Entities pValue	Entities FDR	#Reactions found	#Reactions total	Reactions ratio	Species identifier	Species name	Submitted entities found	Mapped entities	Submitted entities hit interactor	Interacts with	Found reaction identifiers
R-HSA-1839130	Signaling by activated point mutants of FGFR3	3	17	0	0	0.00140496	2.81903e-06	0.000950012	6	6	0.000619003	48887	Homo sapiens	FGFR3				R-HSA-2033485;R-HSA-2012074;R-HSA-2012073;R-HSA-2012084;R-HSA-2033476;R-HSA-2012082
R-HSA-2033514	FGFR3 mutant receptor activation	3	26	0	0	0.00214876	9.99093e-06	0.00167848	9	9	0.000928505	48887	Homo sapiens	FGFR3				R-HSA-2033485;R-HSA-2077420;R-HSA-2012074;R-HSA-2012073;R-HSA-2012084;R-HSA-2033476;R-HSA-2012082;R-HSA-2038387;R-HSA-2038386
R-HSA-5655332	Signaling by FGFR3 in disease	3	40	0	41	0.00330579	0.000255556	0.0214667	28	28	0.00288868	48887	Homo sapiens	FGFR3				R-HSA-8853317;R-HSA-8853316;R-HSA-8853315;R-HSA-8853314;R-HSA-5655315;R-HSA-5655262;R-HSA-8853323;R-HSA-2033485;R-HSA-5655247;R-HSA-5655244;R-HSA-2033476;R-HSA-5655243;R-HSA-5655285;R-HSA-5655295;R-HSA-2012084;R-HSA-2012082;R-HSA-2038387;R-HSA-2038386;R-HSA-5655289;R-HSA-5655270;R-HSA-2077420;R-HSA-2012074;R-HSA-2012073;R-HSA-8853310;R-HSA-8853309;R-HSA-8853308;R-HSA-5655277;R-HSA-8853307
R-HSA-8853338	Signaling by FGFR3 point mutants in cancer	3	40	0	41	0.00330579	0.000255556	0.0214667	19	19	0.00196018	48887	Homo sapiens	FGFR3				R-HSA-5655285;R-HSA-5655315;R-HSA-5655262;R-HSA-5655295;R-HSA-2012084;R-HSA-2012082;R-HSA-2038387;R-HSA-2038386;R-HSA-5655289;R-HSA-5655270;R-HSA-2033485;R-HSA-2077420;R-HSA-2012074;R-HSA-2012073;R-HSA-5655247;R-HSA-5655244;R-HSA-5655277;R-HSA-2033476;R-HSA-5655243
R-HSA-190239	FGFR3 ligand binding and activation	2	19	0	0	0.00157025	0.000427144	0.0286187	4	6	0.000619003	48887	Homo sapiens	FGFR3				R-HSA-190385;R-HSA-190263;R-HSA-190388;R-HSA-190261
R-HSA-5654704	SHC-mediated cascade:FGFR3	2	25	0	0	0.00206612	0.000735234	0.0411731	4	4	0.000412669	48887	Homo sapiens	FGFR3				R-HSA-5654646;R-HSA-5654647;R-HSA-5654625;R-HSA-5654634
R-HSA-1280215	Cytokine Signaling in Immune system	8	756	1	825	0.0624793	0.00115367	0.0553763	20	348	0.0359022	48887	Homo sapiens	CSF3R;LTA;IL20RA;KPNA2;FGFR3;EDA2R;IL18BP	P01374;P22607-2;P22607-1;O95998;P52292;Q9UHF4;Q99062;Q9HAV5	ABL1	P15498;Q13905;P63104	R-HSA-5668534;R-HSA-5669013;R-HSA-5668789;R-HSA-879914;R-HSA-5676593;R-HSA-5668414;R-HSA-1176059;R-HSA-448744;R-HSA-8848392;R-HSA-5668454;R-HSA-912734;R-HSA-5672965;R-HSA-8854738;R-HSA-5668481;R-HSA-912757;R-HSA-5676591;R-HSA-912727;R-HSA-6787737;R-HSA-448728;R-HSA-5669097
R-HSA-1368071	NR1D1 (REV-ERBA) represses gene expression	2	10	0	32	0.000826446	0.0018551	0.0779141	6	6	0.000619003	48887	Homo sapiens	NR1D1				R-HSA-5663271;R-HSA-1368069;R-HSA-5663252;R-HSA-5663265;R-HSA-5663245;R-HSA-5663258
R-HSA-2151201	Transcriptional activation of mitochondrial biogenesis	3	66	0	112	0.00545455	0.00244485	0.0828646	3	27	0.00278552	48887	Homo sapiens	ATP5B;NR1D1				R-HSA-2466369;R-HSA-1368140;R-HSA-1592247
R-HSA-1226099	Signaling by FGFR in disease	3	92	0	98	0.00760331	0.00282505	0.0828646	28	106	0.0109357	48887	Homo sapiens	FGFR3				R-HSA-8853317;R-HSA-8853316;R-HSA-8853315;R-HSA-8853314;R-HSA-5655315;R-HSA-5655262;R-HSA-8853323;R-HSA-2033485;R-HSA-5655247;R-HSA-5655244;R-HSA-2033476;R-HSA-5655243;R-HSA-5655285;R-HSA-5655295;R-HSA-2012084;R-HSA-2012082;R-HSA-2038387;R-HSA-2038386;R-HSA-5655289;R-HSA-5655270;R-HSA-2077420;R-HSA-2012074;R-HSA-2012073;R-HSA-8853310;R-HSA-8853309;R-HSA-8853308;R-HSA-5655277;R-HSA-8853307
R-HSA-5669034	TNFs bind their physiological receptors	2	26	0	25	0.00214876	0.00287072	0.0828646	2	11	0.00113484	48887	Homo sapiens	LTA;EDA2R				R-HSA-5669013;R-HSA-5669097
R-HSA-1592230	Mitochondrial biogenesis	3	78	0	112	0.00644628	0.00295945	0.0828646	3	29	0.00299185	48887	Homo sapiens	ATP5B;NR1D1				R-HSA-2466369;R-HSA-1368140;R-HSA-1592247
R-HSA-2033515	t(4;14) translocations of FGFR3	1	3	0	0	0.000247934	0.00474698	0.118675	2	2	0.000206334	48887	Homo sapiens	FGFR3				R-HSA-2038387;R-HSA-2038386
R-HSA-5579007	Defective ACY1 causes encephalopathy	1	4	0	0	0.000330579	0.00632451	0.132203	1	1	0.000103167	48887	Homo sapiens	ACY1				R-HSA-5579081
R-HSA-2219530	Constitutive Signaling by Aberrant PI3K in Cancer	2	85	0	0	0.00702479	0.00802103	0.132203	1	2	0.000206334	48887	Homo sapiens	FGFR3				R-HSA-2400009
R-HSA-449147	Signaling by Interleukins	5	434	1	506	0.0358678	0.00930908	0.132203	10	218	0.0224905	48887	Homo sapiens	CSF3R;IL20RA;FGFR3;IL18BP	P22607-2;P22607-1;O95998;Q9UHF4;Q99062	ABL1	P15498;Q13905;P63104	R-HSA-912734;R-HSA-5672965;R-HSA-8854738;R-HSA-879914;R-HSA-912757;R-HSA-912727;R-HSA-6787737;R-HSA-448744;R-HSA-448728;R-HSA-8848392
R-HSA-8854691	Interleukin-19, 20, 22, 24	1	9	0	2	0.000743802	0.0141762	0.132203	2	6	0.000619003	48887	Homo sapiens	IL20RA				R-HSA-448744;R-HSA-448728
R-HSA-5632681	Ligand-receptor interactions	0	8	1	2	0.000661157	0.0141762	0.132203	1	4	0.000412669	48887	Homo sapiens			ABL1	Q4KMG0	R-HSA-5632652
R-HSA-190371	FGFR3b ligand binding and activation	1	10	0	0	0.000826446	0.0157394	0.132203	2	2	0.000206334	48887	Homo sapiens	FGFR3				R-HSA-190385;R-HSA-190263
R-HSA-428890	Role of Abl in Robo-Slit signaling	1	12	0	0	0.000991736	0.0188587	0.132203	4	4	0.000412669	48887	Homo sapiens	ABL1				R-HSA-428885;R-HSA-428883;R-HSA-376141;R-HSA-428888
R-HSA-6811558	PI5P, PP2A and IER3 Regulate PI3K/AKT Signaling	2	101	0	39	0.00834711	0.0195515	0.132203	1	7	0.000722171	48887	Homo sapiens	FGFR3				R-HSA-2316434
R-HSA-1368082	RORA activates gene expression	2	38	0	102	0.0031405	0.019821	0.132203	4	10	0.00103167	48887	Homo sapiens	NR1D1				R-HSA-400342;R-HSA-1368065;R-HSA-549475;R-HSA-5663273
R-HSA-5654227	Phospholipase C-mediated cascade; FGFR3	2	60	0	78	0.00495868	0.019821	0.132203	3	20	0.00206334	48887	Homo sapiens	FGFR3				R-HSA-5654148;R-HSA-5654224;R-HSA-5654222
R-HSA-444473	Formyl peptide receptors bind formyl peptides and many other ligands	1	11	0	2	0.000909091	0.0204148	0.132203	1	3	0.000309502	48887	Homo sapiens	SAA1				R-HSA-391913
R-HSA-5668541	TNFR2 non-canonical NF-kB pathway	2	100	0	53	0.00826446	0.0214713	0.132203	9	41	0.00422986	48887	Homo sapiens	LTA;EDA2R				R-HSA-5668454;R-HSA-5668534;R-HSA-5669013;R-HSA-5668789;R-HSA-5676593;R-HSA-5668481;R-HSA-5668414;R-HSA-5676591;R-HSA-5669097
R-HSA-199418	Negative regulation of the PI3K/AKT network	2	110	0	39	0.00909091	0.0220338	0.132203	1	10	0.00103167	48887	Homo sapiens	FGFR3				R-HSA-2316434
R-HSA-1368108	BMAL1:CLOCK,NPAS2 activates circadian gene expression	2	64	0	92	0.00528926	0.0234669	0.140801	2	29	0.00299185	48887	Homo sapiens	NR1D1				R-HSA-5663155;R-HSA-549475
R-HSA-190372	FGFR3c ligand binding and activation	1	18	0	0	0.0014876	0.0281598	0.141911	2	4	0.000412669	48887	Homo sapiens	FGFR3				R-HSA-190388;R-HSA-190261
R-HSA-5654732	Negative regulation of FGFR3 signaling	2	34	0	145	0.00280992	0.0311856	0.141911	1	14	0.00144434	48887	Homo sapiens	FGFR3				R-HSA-5654565
R-HSA-879415	Advanced glycosylation endproduct receptor signaling	1	16	0	5	0.00132231	0.0312413	0.141911	2	4	0.000412669	48887	Homo sapiens	SAA1				R-HSA-879411;R-HSA-879362
R-HSA-3000471	Scavenging by Class B Receptors	1	20	0	0	0.00165289	0.0312413	0.141911	2	4	0.000412669	48887	Homo sapiens	SAA1				R-HSA-2512800;R-HSA-2197646
R-HSA-5676594	TNF receptor superfamily (TNFSF) members mediating non-canonical NF-kB pathway	1	17	0	7	0.00140496	0.0312413	0.141911	3	12	0.00123801	48887	Homo sapiens	LTA				R-HSA-5668789;R-HSA-5676593;R-HSA-5676591
R-HSA-168256	Immune System	10	2059	2	1850	0.170165	0.031562	0.141911	34	1159	0.119571	48887	Homo sapiens	CSF3R;LTA;IL20RA;SAA1;ABL1;KPNA2;FGFR3;EDA2R;IL18BP	P01374;P00519;P22607-2;P22607-1;O95998;P52292;Q9UHF4;P0DJI8;Q99062;Q9HAV5	ABL1;FGFR3	P15498;P08238;Q13905;Q7Z434;P35222;P63104	R-HSA-5669013;R-HSA-3134883;R-HSA-168909;R-HSA-879362;R-HSA-8848392;R-HSA-912734;R-HSA-5672965;R-HSA-8854738;R-HSA-983704;R-HSA-3134904;R-HSA-5668481;R-HSA-3134901;R-HSA-912727;R-HSA-448728;R-HSA-5668534;R-HSA-5668789;R-HSA-168166;R-HSA-879914;R-HSA-5676593;R-HSA-5668414;R-HSA-1176059;R-HSA-874087;R-HSA-3134914;R-HSA-389352;R-HSA-448744;R-HSA-5668454;R-HSA-2316434;R-HSA-2130194;R-HSA-912757;R-HSA…
R-HSA-8853334	Signaling by FGFR3 fusions in cancer	1	16	0	7	0.00132231	0.0327786	0.141911	9	9	0.000928505	48887	Homo sapiens	FGFR3				R-HSA-8853317;R-HSA-8853316;R-HSA-8853315;R-HSA-8853314;R-HSA-8853310;R-HSA-8853309;R-HSA-8853308;R-HSA-8853323;R-HSA-8853307
R-HSA-2142700	Synthesis of Lipoxins (LX)	1	22	0	0	0.00181818	0.0343135	0.141911	1	5	0.000515836	48887	Homo sapiens	HPGD				R-HSA-2161779
R-HSA-163210	Formation of ATP by chemiosmotic coupling	1	23	0	0	0.00190083	0.0358461	0.141911	3	3	0.000309502	48887	Homo sapiens	ATP5B				R-HSA-164834;R-HSA-164832;R-HSA-164840
R-HSA-2022854	Keratan sulfate biosynthesis	1	37	0	0	0.00305785	0.057059	0.141911	1	9	0.000928505	48887	Homo sapiens	CHST2				R-HSA-2046222
R-HSA-933542	TRAF6 mediated NF-kB activation	1	30	0	9	0.00247934	0.058557	0.141911	1	4	0.000412669	48887	Homo sapiens	SAA1				R-HSA-168166
R-HSA-376176	Signaling by Robo receptor	1	38	0	1	0.0031405	0.058557	0.141911	4	18	0.00185701	48887	Homo sapiens	ABL1				R-HSA-428885;R-HSA-428883;R-HSA-376141;R-HSA-428888
R-HSA-3134963	DEx/H-box helicases activate type I IFN and inflammatory cytokines production	1	16	0	28	0.00132231	0.0645261	0.141911	1	5	0.000515836	48887	Homo sapiens	SAA1				R-HSA-168166
R-HSA-2219528	PI3K/AKT Signaling in Cancer	2	116	0	159	0.00958678	0.0665021	0.141911	1	21	0.00216651	48887	Homo sapiens	FGFR3				R-HSA-2400009
R-HSA-1810476	RIP-mediated NFkB activation via ZBP1	1	28	0	22	0.00231405	0.0719365	0.141911	1	4	0.000412669	48887	Homo sapiens	SAA1				R-HSA-168166
R-HSA-109704	PI3K Cascade	2	96	1	220	0.00793388	0.0763044	0.141911	2	33	0.00340452	48887	Homo sapiens	FGFR3	P22607-2;P22607-1	ABL1	P31946	R-HSA-109699;R-HSA-5672824
R-HSA-5423646	Aflatoxin activation and detoxification	1	51	0	0	0.00421488	0.0778242	0.141911	1	17	0.00175384	48887	Homo sapiens	ACY1				R-HSA-5433074
R-HSA-1638074	Keratan sulfate/keratin metabolism	1	52	0	0	0.00429752	0.0792906	0.141911	1	15	0.00154751	48887	Homo sapiens	CHST2				R-HSA-2046222
R-HSA-1257604	PIP3 activates AKT signaling	2	144	0	164	0.0119008	0.0795168	0.141911	1	31	0.00319818	48887	Homo sapiens	FGFR3				R-HSA-2316434
R-HSA-1852241	Organelle biogenesis and maintenance	3	424	0	267	0.0350413	0.0799065	0.141911	3	96	0.00990405	48887	Homo sapiens	ATP5B;NR1D1				R-HSA-2466369;R-HSA-1368140;R-HSA-1592247
R-HSA-5693548	Sensing of DNA Double Strand Breaks	1	15	0	43	0.00123967	0.0836762	0.141911	2	9	0.000928505	48887	Homo sapiens	KPNA2				R-HSA-5684006;R-HSA-5684008
R-HSA-5673001	RAF/MAP kinase cascade	2	264	0	59	0.0218182	0.0855955	0.141911	1	39	0.00402352	48887	Homo sapiens	FGFR3				R-HSA-5672965
R-HSA-112412	SOS-mediated signalling	2	264	0	59	0.0218182	0.0855955	0.141911	1	41	0.00422986	48887	Homo sapiens	FGFR3				R-HSA-5672965
R-HSA-1268020	Mitochondrial protein import	1	57	0	2	0.00471074	0.0865888	0.141911	4	13	0.00134117	48887	Homo sapiens	ATP5B				R-HSA-1268022;R-HSA-1299476;R-HSA-1299482;R-HSA-1299487
R-HSA-389359	CD28 dependent Vav1 pathway	0	17	1	41	0.00140496	0.0865888	0.141911	1	6	0.000619003	48887	Homo sapiens			ABL1	P15498	R-HSA-389352
R-HSA-187706	Signalling to p38 via RIT and RIN	2	269	0	59	0.0222314	0.0879712	0.141911	1	42	0.00433302	48887	Homo sapiens	FGFR3				R-HSA-5672965
R-HSA-5693606	DNA Double Strand Break Response	2	74	0	264	0.0061157	0.0894064	0.141911	3	44	0.00453936	48887	Homo sapiens	ABL1;KPNA2				R-HSA-5684006;R-HSA-5686578;R-HSA-5684008
R-HSA-912526	Interleukin receptor SHC signaling	2	274	0	59	0.0226446	0.0898864	0.141911	1	45	0.00464253	48887	Homo sapiens	FGFR3				R-HSA-5672965
R-HSA-198203	PI3K/AKT activation	2	147	0	185	0.0121488	0.0908488	0.141911	1	36	0.00371402	48887	Homo sapiens	FGFR3				R-HSA-2316434
R-HSA-179812	GRB2 events in EGFR signaling	2	264	0	71	0.0218182	0.0908488	0.141911	1	42	0.00433302	48887	Homo sapiens	FGFR3				R-HSA-5672965
R-HSA-167044	Signalling to RAS	2	275	0	60	0.0227273	0.0908488	0.141911	1	49	0.00505519	48887	Homo sapiens	FGFR3				R-HSA-5672965
R-HSA-881907	Gastrin-CREB signalling pathway via PKC and MAPK	3	501	1	213	0.041405	0.0916194	0.141911	5	68	0.00701537	48887	Homo sapiens	SAA1;FGFR3	P22607-2;P22607-1;P0DJI8	ABL1	P00533	R-HSA-749448;R-HSA-5672965;R-HSA-749452;R-HSA-2179387;R-HSA-379048
R-HSA-2162123	Synthesis of Prostaglandins (PG) and Thromboxanes (TX)	1	58	0	3	0.00479339	0.0923875	0.141911	1	32	0.00330135	48887	Homo sapiens	HPGD				R-HSA-2161662
R-HSA-1250347	SHC1 events in ERBB4 signaling	2	264	0	85	0.0218182	0.0957076	0.141911	1	43	0.00443619	48887	Homo sapiens	FGFR3				R-HSA-5672965
R-HSA-180336	SHC1 events in EGFR signaling	2	264	0	85	0.0218182	0.0957076	0.141911	1	43	0.00443619	48887	Homo sapiens	FGFR3				R-HSA-5672965
R-HSA-400253	Circadian Clock	2	91	0	259	0.00752066	0.0976725	0.141911	13	57	0.00588053	48887	Homo sapiens	NR1D1				R-HSA-5663252;R-HSA-1368119;R-HSA-5663155;R-HSA-549475;R-HSA-5663258;R-HSA-400342;R-HSA-5663271;R-HSA-1368069;R-HSA-1368065;R-HSA-5663265;R-HSA-1368140;R-HSA-5663245;R-HSA-5663273
R-HSA-170968	Frs2-mediated activation	2	271	1	82	0.0223967	0.0981655	0.141911	3	45	0.00464253	48887	Homo sapiens	FGFR3	P22607-2;P22607-1	ABL1	P46109;Q13905	R-HSA-170978;R-HSA-5672965;R-HSA-170975
R-HSA-174800	Chylomicron-mediated lipid transport	0	36	1	37	0.00297521	0.103879	0.141911	1	20	0.00206334	48887	Homo sapiens			NR1D1	P06727	R-HSA-174741
R-HSA-5654710	PI-3K cascade:FGFR3	2	144	0	231	0.0119008	0.104642	0.141911	4	38	0.00392035	48887	Homo sapiens	FGFR3				R-HSA-2316434;R-HSA-5654640;R-HSA-5654705;R-HSA-5654637
R-HSA-1250342	PI3K events in ERBB4 signaling	2	144	0	231	0.0119008	0.104642	0.141911	1	34	0.00350769	48887	Homo sapiens	FGFR3				R-HSA-2316434
R-HSA-5654689	PI-3K cascade:FGFR1	2	144	0	231	0.0119008	0.104642	0.141911	1	38	0.00392035	48887	Homo sapiens	FGFR3				R-HSA-2316434
R-HSA-5654695	PI-3K cascade:FGFR2	2	144	0	231	0.0119008	0.104642	0.141911	1	38	0.00392035	48887	Homo sapiens	FGFR3				R-HSA-2316434
R-HSA-5654720	PI-3K cascade:FGFR4	2	144	0	231	0.0119008	0.104642	0.141911	1	38	0.00392035	48887	Homo sapiens	FGFR3				R-HSA-2316434
R-HSA-3134973	LRR FLII-interacting protein 1 (LRRFIP1) activates type I IFN production	0	8	1	63	0.000661157	0.105306	0.141911	4	5	0.000515836	48887	Homo sapiens			ABL1	P35222	R-HSA-3134904;R-HSA-3134901;R-HSA-3134883;R-HSA-3134914
R-HSA-168276	NS1 Mediated Effects on Host Pathways	1	45	0	26	0.00371901	0.105306	0.141911	2	6	0.000619003	48887	Homo sapiens	KPNA2				R-HSA-1176059;R-HSA-6791035
R-HSA-912631	Regulation of signaling by CBL	0	24	1	54	0.00198347	0.10673	0.141911	2	7	0.000722171	48887	Homo sapiens			ABL1	P15498;Q13905	R-HSA-912734;R-HSA-912727
R-HSA-5654706	FRS-mediated FGFR3 signaling	2	265	0	109	0.0219008	0.107671	0.141911	9	47	0.00484886	48887	Homo sapiens	FGFR3				R-HSA-5654631;R-HSA-5654628;R-HSA-5672965;R-HSA-5654416;R-HSA-5654623;R-HSA-5654413;R-HSA-5654408;R-HSA-5654409;R-HSA-5654633
R-HSA-5654700	FRS-mediated FGFR2 signaling	2	265	0	109	0.0219008	0.107671	0.141911	1	47	0.00484886	48887	Homo sapiens	FGFR3				R-HSA-5672965
R-HSA-5654693	FRS-mediated FGFR1 signaling	2	265	0	109	0.0219008	0.107671	0.141911	1	47	0.00484886	48887	Homo sapiens	FGFR3				R-HSA-5672965
R-HSA-5654712	FRS-mediated FGFR4 signaling	2	265	0	109	0.0219008	0.107671	0.141911	1	47	0.00484886	48887	Homo sapiens	FGFR3				R-HSA-5672965
R-HSA-5684996	MAPK1/MAPK3 signaling	2	271	0	114	0.0223967	0.111748	0.141911	1	46	0.00474569	48887	Homo sapiens	FGFR3				R-HSA-5672965
R-HSA-372708	p130Cas linkage to MAPK signaling for integrins	0	22	1	57	0.00181818	0.11382	0.141911	1	3	0.000309502	48887	Homo sapiens			ABL1	P46108	R-HSA-372697
R-HSA-198745	Signalling to STAT3	0	5	1	73	0.000413223	0.115231	0.141911	1	1	0.000103167	48887	Homo sapiens			CSF3R	P40763	R-HSA-198732
R-HSA-375170	CDO in myogenesis	1	32	1	49	0.00264463	0.116641	0.141911	5	14	0.00144434	48887	Homo sapiens	ABL1	P00519	ABL1	Q4KMG0	R-HSA-448951;R-HSA-449200;R-HSA-375138;R-HSA-448958;R-HSA-448957
R-HSA-525793	Myogenesis	1	32	1	49	0.00264463	0.116641	0.141911	5	14	0.00144434	48887	Homo sapiens	ABL1	P00519	ABL1	Q4KMG0	R-HSA-448951;R-HSA-449200;R-HSA-375138;R-HSA-448958;R-HSA-448957
R-HSA-1168372	Downstream signaling events of B Cell Receptor (BCR)	2	220	0	182	0.0181818	0.119503	0.141911	1	43	0.00443619	48887	Homo sapiens	FGFR3				R-HSA-2316434
R-HSA-451927	Interleukin-2 signaling	2	281	0	122	0.0232231	0.120025	0.141911	1	64	0.0066027	48887	Homo sapiens	FGFR3				R-HSA-5672965
R-HSA-180292	GAB1 signalosome	2	147	0	268	0.0121488	0.122118	0.141911	1	44	0.00453936	48887	Homo sapiens	FGFR3				R-HSA-2316434
R-HSA-5579029	Metabolic disorders of biological oxidation enzymes	1	82	0	1	0.00677686	0.123655	0.141911	1	33	0.00340452	48887	Homo sapiens	ACY1				R-HSA-5579081
R-HSA-5663213	RHO GTPases Activate WASPs and WAVEs	1	42	0	49	0.00347107	0.125051	0.141911	1	10	0.00103167	48887	Homo sapiens	ABL1				R-HSA-2130194
R-HSA-5218921	VEGFR2 mediated cell proliferation	2	282	0	131	0.0233058	0.125805	0.141911	1	51	0.00526153	48887	Homo sapiens	FGFR3				R-HSA-5672965
R-HSA-1606322	ZBP1(DAI) mediated induction of type I IFNs	1	33	0	59	0.00272727	0.126445	0.141911	1	10	0.00103167	48887	Homo sapiens	SAA1				R-HSA-168166
R-HSA-168253	Host Interactions with Influenza Factors	1	49	0	38	0.00404959	0.127838	0.141911	2	8	0.000825338	48887	Homo sapiens	KPNA2				R-HSA-1176059;R-HSA-6791035
R-HSA-170984	ARMS-mediated activation	2	269	1	149	0.0222314	0.132726	0.141911	2	44	0.00453936	48887	Homo sapiens	FGFR3	P22607-2;P22607-1	ABL1	P31946	R-HSA-5672965;R-HSA-169901
R-HSA-8853659	RET signaling	2	289	0	143	0.0238843	0.132726	0.141911	1	63	0.00649954	48887	Homo sapiens	FGFR3				R-HSA-5672965
R-HSA-1660662	Glycosphingolipid metabolism	1	84	0	6	0.00694215	0.133385	0.141911	1	30	0.00309502	48887	Homo sapiens	ASAH2				R-HSA-1606583
R-HSA-445989	TAK1 activates NFkB by phosphorylation and activation of IKKs complex	1	37	0	62	0.00305785	0.134767	0.141911	1	4	0.000412669	48887	Homo sapiens	SAA1				R-HSA-168166
R-HSA-383280	Nuclear Receptor transcription pathway	1	84	0	13	0.00694215	0.138899	0.141911	1	1	0.000103167	48887	Homo sapiens	NR1D1				R-HSA-376419
R-HSA-2586552	Signaling by Leptin	2	272	1	169	0.0224793	0.141911	0.141911	4	58	0.0059837	48887	Homo sapiens	FGFR3	P22607-2;P22607-1	CSF3R	P40763	R-HSA-5672965;R-HSA-2671868;R-HSA-2671839;R-HSA-2730595
R-HSA-8849474	PTK6 Activates STAT3	0	7	1	92	0.000578512	0.143012	0.143012	3	9	0.000928505	48887	Homo sapiens			CSF3R	P40763	R-HSA-8848087;R-HSA-2730595;R-HSA-8848124
R-HSA-373080	Class B/2 (Secretin family receptors)	1	90	0	11	0.00743802	0.143012	0.143012	1	17	0.00175384	48887	Homo sapiens	PTH				R-HSA-420489
R-HSA-169893	Prolonged ERK activation events	2	273	1	170	0.022562	0.143546	0.143546	4	50	0.00515836	48887	Homo sapiens	FGFR3	P22607-2;P22607-1	ABL1	P46109;P31946;Q13905	R-HSA-170978;R-HSA-5672965;R-HSA-170975;R-HSA-169901
R-HSA-375165	NCAM signaling for neurite out-growth	2	301	0	149	0.024876	0.147929	0.147929	1	62	0.00639637	48887	Homo sapiens	FGFR3				R-HSA-5672965
R-HSA-389356	CD28 co-stimulation	0	39	1	66	0.00322314	0.148467	0.148467	1	19	0.00196018	48887	Homo sapiens			ABL1	P15498	R-HSA-389352
R-HSA-187687	Signalling to ERKs	2	284	1	171	0.0234711	0.149581	0.149581	4	63	0.00649954	48887	Homo sapiens	FGFR3	P22607-2;P22607-1	ABL1	P46109;P31946;Q13905	R-HSA-170978;R-HSA-5672965;R-HSA-170975;R-HSA-169901
R-HSA-2892247	POU5F1 (OCT4), SOX2, NANOG activate genes related to proliferation	0	21	1	92	0.00173554	0.160619	0.160619	1	16	0.00165068	48887	Homo sapiens			CSF3R	P40763	R-HSA-452515
R-HSA-2730905	Role of LAT2/NTAL/LAB on calcium mobilization	2	308	0	169	0.0254545	0.165739	0.165739	1	38	0.00392035	48887	Homo sapiens	FGFR3				R-HSA-2316434
R-HSA-844456	The NLRP3 inflammasome	0	19	1	109	0.00157025	0.179192	0.179192	1	17	0.00175384	48887	Homo sapiens			FGFR3	P08238	R-HSA-874087
R-HSA-5663202	Diseases of signal transduction	3	384	1	626	0.0317355	0.180166	0.180166	31	263	0.027133	48887	Homo sapiens	FGFR3	P22607-2;P22607;P22607-1	ABL1	P00533	R-HSA-8853317;R-HSA-8853316;R-HSA-8853315;R-HSA-8853314;R-HSA-5655315;R-HSA-5655262;R-HSA-8853323;R-HSA-2033485;R-HSA-5655247;R-HSA-5655244;R-HSA-2033476;R-HSA-5655243;R-HSA-5655285;R-HSA-5655295;R-HSA-2012084;R-HSA-1247999;R-HSA-2012082;R-HSA-2038387;R-HSA-2038386;R-HSA-2400009;R-HSA-5655289;R-HSA-5655270;R-HSA-2077420;R-HSA-2012074;R-HSA-1248677;R-HSA-2012073;R-HSA-8853310;R-HSA-8853309;R-HSA-8…
R-HSA-5336415	Uptake and function of diphtheria toxin	0	10	1	118	0.000826446	0.181813	0.181813	1	5	0.000515836	48887	Homo sapiens			FGFR3	P08238	R-HSA-5336420
R-HSA-114604	GPVI-mediated activation cascade	0	64	1	71	0.00528926	0.184426	0.184426	1	25	0.00257918	48887	Homo sapiens			ABL1	P15498	R-HSA-442273
R-HSA-5693532	DNA Double-Strand Break Repair	2	167	0	388	0.0138017	0.186231	0.186231	4	107	0.0110389	48887	Homo sapiens	ABL1;KPNA2				R-HSA-5684006;R-HSA-5686578;R-HSA-5686587;R-HSA-5684008
R-HSA-622312	Inflammasomes	0	29	1	111	0.00239669	0.188331	0.188331	1	27	0.00278552	48887	Homo sapiens			FGFR3	P08238	R-HSA-874087
R-HSA-450513	Tristetraprolin (TTP, ZFP36) binds and destabilizes mRNA	0	19	1	121	0.00157025	0.196086	0.196086	1	4	0.000412669	48887	Homo sapiens			ABL1	P31946	R-HSA-450394
R-HSA-4641262	Disassembly of the destruction complex and recruitment of AXIN to the membrane	0	33	1	113	0.00272727	0.196086	0.196086	1	7	0.000722171	48887	Homo sapiens			ABL1	P35222	R-HSA-201685
R-HSA-512988	Interleukin-3, 5 and GM-CSF signaling	2	290	1	270	0.0239669	0.196624	0.196624	5	77	0.00794388	48887	Homo sapiens	FGFR3	P22607-2;P22607-1	ABL1	P15498;Q13905;P63104	R-HSA-912734;R-HSA-5672965;R-HSA-879914;R-HSA-912757;R-HSA-912727
R-HSA-112399	IRS-mediated signalling	2	316	1	256	0.0261157	0.202434	0.202434	3	74	0.00763438	48887	Homo sapiens	FGFR3	P22607-2;P22607-1	ABL1	P31946	R-HSA-109699;R-HSA-5672965;R-HSA-5672824
R-HSA-2428928	IRS-related events triggered by IGF1R	2	320	1	257	0.0264463	0.204182	0.204182	3	77	0.00794388	48887	Homo sapiens	FGFR3	P22607-2;P22607-1	ABL1	P31946	R-HSA-109699;R-HSA-5672965;R-HSA-5672824
R-HSA-2428924	IGF1R signaling cascade	2	321	1	257	0.0265289	0.204765	0.204765	3	82	0.00845971	48887	Homo sapiens	FGFR3	P22607-2;P22607-1	ABL1	P31946	R-HSA-109699;R-HSA-5672965;R-HSA-5672824
R-HSA-2404192	Signaling by Type 1 Insulin-like Growth Factor 1 Receptor (IGF1R)	2	321	1	257	0.0265289	0.204765	0.204765	3	84	0.00866605	48887	Homo sapiens	FGFR3	P22607-2;P22607-1	ABL1	P31946	R-HSA-109699;R-HSA-5672965;R-HSA-5672824
R-HSA-5638302	Signaling by Overexpressed Wild-Type EGFR in Cancer	0	6	1	142	0.000495868	0.207586	0.207586	1	2	0.000206334	48887	Homo sapiens			ABL1	P00533	R-HSA-1248677
R-HSA-5638303	Inhibition of Signaling by Overexpressed EGFR	0	6	1	142	0.000495868	0.207586	0.207586	1	2	0.000206334	48887	Homo sapiens			ABL1	P00533	R-HSA-1248677
R-HSA-5685938	HDR through Single Strand Annealing (SSA)	1	39	0	119	0.00322314	0.213906	0.213906	1	6	0.000619003	48887	Homo sapiens	ABL1				R-HSA-5686587
R-HSA-163200	Respiratory electron transport, ATP synthesis by chemiosmotic coupling, and heat production by uncoupling proteins.	1	143	0	18	0.0118182	0.213906	0.213906	3	29	0.00299185	48887	Homo sapiens	ATP5B				R-HSA-164834;R-HSA-164832;R-HSA-164840
R-HSA-2179392	EGFR Transactivation by Gastrin	0	12	1	144	0.000991736	0.217676	0.217676	1	6	0.000619003	48887	Homo sapiens			ABL1	P00533	R-HSA-2179387
R-HSA-74751	Insulin receptor signalling cascade	2	319	1	292	0.0263636	0.221171	0.221171	3	90	0.00928505	48887	Homo sapiens	FGFR3	P22607-2;P22607-1	ABL1	P31946	R-HSA-109699;R-HSA-5672965;R-HSA-5672824
R-HSA-6804114	TP53 Regulates Transcription of Genes Involved in G2 Cell Cycle Arrest	0	21	1	142	0.00173554	0.223919	0.223919	2	11	0.00113484	48887	Homo sapiens			ABL1	P31947	R-HSA-6803890;R-HSA-6803871
R-HSA-5632684	Hedgehog 'on' state	0	90	1	76	0.00743802	0.225162	0.225162	1	37	0.00381719	48887	Homo sapiens			ABL1	Q4KMG0	R-HSA-5632652
R-HSA-2871796	FCERI mediated MAPK activation	2	442	0	148	0.0365289	0.226474	0.226474	1	59	0.00608687	48887	Homo sapiens	FGFR3				R-HSA-5672965
R-HSA-450385	Butyrate Response Factor 1 (BRF1) binds and destabilizes mRNA	0	19	1	151	0.00157025	0.233809	0.233809	2	6	0.000619003	48887	Homo sapiens			ABL1	P31946	R-HSA-450406;R-HSA-482788
R-HSA-418555	G alpha (s) signalling events	1	167	0	0	0.0138017	0.233809	0.233809	3	10	0.00103167	48887	Homo sapiens	PTH				R-HSA-379044;R-HSA-744887;R-HSA-744886
R-HSA-74752	Signaling by Insulin receptor	2	344	1	292	0.0284298	0.235931	0.235931	3	99	0.0102136	48887	Homo sapiens	FGFR3	P22607-2;P22607-1	ABL1	P31946	R-HSA-109699;R-HSA-5672965;R-HSA-5672824
R-HSA-450604	KSRP (KHSRP) binds and destabilizes mRNA	0	20	1	151	0.00165289	0.236263	0.236263	1	5	0.000515836	48887	Homo sapiens			ABL1	P63104	R-HSA-450620
R-HSA-936440	Negative regulators of RIG-I/MDA5 signaling	0	37	1	140	0.00305785	0.236263	0.236263	1	13	0.00134117	48887	Homo sapiens			ABL1	Q7Z434	R-HSA-936564
R-HSA-2142753	Arachidonic acid metabolism	1	163	0	8	0.0134711	0.238709	0.238709	2	80	0.00825338	48887	Homo sapiens	HPGD				R-HSA-2161779;R-HSA-2161662
R-HSA-428157	Sphingolipid metabolism	1	150	0	26	0.0123967	0.243578	0.243578	1	59	0.00608687	48887	Homo sapiens	ASAH2				R-HSA-1606583
R-HSA-452723	Transcriptional regulation of pluripotent stem cells	0	56	1	124	0.0046281	0.246002	0.246002	1	35	0.00361085	48887	Homo sapiens			CSF3R	P40763	R-HSA-452515
R-HSA-354192	Integrin alphaIIb beta3 signaling	0	37	1	152	0.00305785	0.250827	0.250827	1	24	0.00247601	48887	Homo sapiens			ABL1	P46108	R-HSA-372697
R-HSA-1433557	Signaling by SCF-KIT	2	360	1	300	0.0297521	0.252551	0.252551	3	106	0.0109357	48887	Homo sapiens	FGFR3	P22607-2;P22607-1	ABL1	P15498	R-HSA-2316434;R-HSA-1433542;R-HSA-5672965
R-HSA-500792	GPCR ligand binding	2	581	0	39	0.0480165	0.25493	0.25493	2	162	0.0167131	48887	Homo sapiens	PTH;SAA1				R-HSA-391913;R-HSA-420489
R-HSA-445144	Signal transduction by L1	0	25	1	165	0.00206612	0.258009	0.258009	1	11	0.00113484	48887	Homo sapiens			ABL1	P00533	R-HSA-445069
R-HSA-388841	Costimulation by the CD28 family	0	96	1	97	0.00793388	0.258009	0.258009	1	34	0.00350769	48887	Homo sapiens			ABL1	P15498	R-HSA-389352
R-HSA-1630316	Glycosaminoglycan metabolism	1	183	0	5	0.015124	0.259199	0.259199	1	82	0.00845971	48887	Homo sapiens	CHST2				R-HSA-2046222
R-HSA-2424491	DAP12 signaling	2	385	0	288	0.0318182	0.262671	0.262671	2	104	0.0107294	48887	Homo sapiens	FGFR3				R-HSA-2316434;R-HSA-5672965
R-HSA-5683057	MAPK family signaling cascades	2	321	0	349	0.0265289	0.263267	0.263267	1	86	0.00887238	48887	Homo sapiens	FGFR3				R-HSA-5672965
R-HSA-4615885	SUMOylation of DNA replication proteins	0	48	1	153	0.00396694	0.263943	0.263943	1	8	0.000825338	48887	Homo sapiens			ABL1	P11387	R-HSA-4641362
R-HSA-76009	Platelet Aggregation (Plug Formation)	0	49	1	152	0.00404959	0.265125	0.265125	1	27	0.00278552	48887	Homo sapiens			ABL1	P46108	R-HSA-372697
R-HSA-912446	Meiotic recombination	0	60	1	150	0.00495868	0.269832	0.269832	2	8	0.000825338	48887	Homo sapiens			ABL1	O43196	R-HSA-912429;R-HSA-912496
R-HSA-2172127	DAP12 interactions	2	402	0	291	0.0332231	0.272805	0.272805	2	120	0.0123801	48887	Homo sapiens	FGFR3				R-HSA-2316434;R-HSA-5672965
R-HSA-186763	Downstream signal transduction	2	382	1	325	0.0315702	0.279962	0.279962	3	103	0.0106262	48887	Homo sapiens	FGFR3	P22607-2;P22607-1	ABL1	Q13905	R-HSA-382052;R-HSA-2316434;R-HSA-5672965
R-HSA-983705	Signaling by the B Cell Receptor (BCR)	2	385	1	320	0.0318182	0.284733	0.284733	2	64	0.0066027	48887	Homo sapiens	FGFR3	P22607-2;P22607-1	ABL1	P15498	R-HSA-2316434;R-HSA-983704
R-HSA-5654708	Downstream signaling of activated FGFR3	2	370	0	351	0.0305785	0.285329	0.285329	20	109	0.0112452	48887	Homo sapiens	FGFR3				R-HSA-5654646;R-HSA-5654647;R-HSA-5654640;R-HSA-5654416;R-HSA-5654224;R-HSA-5654705;R-HSA-5654623;R-HSA-2316434;R-HSA-5654631;R-HSA-5654628;R-HSA-5654148;R-HSA-5672965;R-HSA-5654625;R-HSA-5654222;R-HSA-5654637;R-HSA-5654413;R-HSA-5654634;R-HSA-5654408;R-HSA-5654409;R-HSA-5654633
R-HSA-5654716	Downstream signaling of activated FGFR4	2	370	0	351	0.0305785	0.285329	0.285329	2	109	0.0112452	48887	Homo sapiens	FGFR3				R-HSA-2316434;R-HSA-5672965
R-HSA-5654696	Downstream signaling of activated FGFR2	2	370	0	351	0.0305785	0.285329	0.285329	2	109	0.0112452	48887	Homo sapiens	FGFR3				R-HSA-2316434;R-HSA-5672965
R-HSA-5654687	Downstream signaling of activated FGFR1	2	373	0	351	0.0308264	0.287119	0.287119	2	110	0.0113484	48887	Homo sapiens	FGFR3				R-HSA-2316434;R-HSA-5672965
R-HSA-4420097	VEGFA-VEGFR2 Pathway	2	369	1	362	0.0304959	0.293081	0.293081	3	115	0.0118642	48887	Homo sapiens	FGFR3	P22607-2;P22607-1	ABL1	P46108;Q15464	R-HSA-4420099;R-HSA-5672965;R-HSA-5218822
R-HSA-5339562	Uptake and actions of bacterial toxins	0	56	1	168	0.0046281	0.295212	0.295212	1	64	0.0066027	48887	Homo sapiens			FGFR3	P08238	R-HSA-5336420
R-HSA-1169410	Antiviral mechanism by IFN-stimulated genes	1	83	0	145	0.0068595	0.297477	0.297477	1	16	0.00165068	48887	Homo sapiens	KPNA2				R-HSA-1176059
R-HSA-1169408	ISG15 antiviral mechanism	1	83	0	145	0.0068595	0.297477	0.297477	1	16	0.00165068	48887	Homo sapiens	KPNA2				R-HSA-1176059
R-HSA-186797	Signaling by PDGF	2	412	1	326	0.0340496	0.298445	0.298445	3	114	0.0117611	48887	Homo sapiens	FGFR3	P22607-2;P22607-1	ABL1	Q13905	R-HSA-382052;R-HSA-2316434;R-HSA-5672965
R-HSA-5637812	Signaling by EGFRvIII in Cancer	0	26	1	207	0.00214876	0.298607	0.298607	1	18	0.00185701	48887	Homo sapiens			ABL1	P00533	R-HSA-1247999
R-HSA-5637810	Constitutive Signaling by EGFRvIII	0	26	1	207	0.00214876	0.298607	0.298607	1	18	0.00185701	48887	Homo sapiens			ABL1	P00533	R-HSA-1247999
R-HSA-1236394	Signaling by ERBB4	2	366	0	379	0.0302479	0.299041	0.299041	2	115	0.0118642	48887	Homo sapiens	FGFR3				R-HSA-2316434;R-HSA-5672965
R-HSA-375276	Peptide ligand-binding receptors	1	200	0	23	0.0165289	0.299735	0.299735	1	71	0.00732487	48887	Homo sapiens	SAA1				R-HSA-391913
R-HSA-1428517	The citric acid (TCA) cycle and respiratory electron transport	1	215	0	21	0.0177686	0.303108	0.303108	3	58	0.0059837	48887	Homo sapiens	ATP5B				R-HSA-164834;R-HSA-164832;R-HSA-164840
R-HSA-194138	Signaling by VEGF	2	378	1	378	0.0312397	0.303806	0.303806	3	121	0.0124832	48887	Homo sapiens	FGFR3	P22607-2;P22607-1	ABL1	P46108;Q15464	R-HSA-4420099;R-HSA-5672965;R-HSA-5218822
R-HSA-174824	Lipoprotein metabolism	0	85	1	149	0.00702479	0.305349	0.305349	1	73	0.00753121	48887	Homo sapiens			NR1D1	P06727	R-HSA-174741
R-HSA-1643713	Signaling by EGFR in Cancer	0	38	1	207	0.0031405	0.312029	0.312029	2	42	0.00433302	48887	Homo sapiens			ABL1	P00533	R-HSA-1248677;R-HSA-1247999
R-HSA-165159	mTOR signalling	0	47	1	215	0.0038843	0.316448	0.316448	1	26	0.00268235	48887	Homo sapiens			ABL1	P31946	R-HSA-5672824
R-HSA-5668914	Diseases of metabolism	1	218	0	26	0.0180165	0.319745	0.319745	1	95	0.00980089	48887	Homo sapiens	ACY1				R-HSA-5579081
R-HSA-109703	PKB-mediated events	0	49	1	218	0.00404959	0.321934	0.321934	1	28	0.00288868	48887	Homo sapiens			ABL1	P31946	R-HSA-5672824
R-HSA-416476	G alpha (q) signalling events	1	240	0	6	0.0198347	0.325205	0.325205	3	20	0.00206334	48887	Homo sapiens	SAA1				R-HSA-749448;R-HSA-749452;R-HSA-379048
R-HSA-2173782	Binding and Uptake of Ligands by Scavenger Receptors	1	236	0	12	0.0195041	0.326292	0.326292	2	32	0.00330135	48887	Homo sapiens	SAA1				R-HSA-2512800;R-HSA-2197646
R-HSA-372790	Signaling by GPCR	4	1473	1	420	0.121736	0.327976	0.327976	13	320	0.0330135	48887	Homo sapiens	PTH;SAA1;FGFR3	P01270;P22607-2;P22607-1;P0DJI8	ABL1	P00533	R-HSA-379044;R-HSA-749448;R-HSA-749454;R-HSA-749452;R-HSA-380073;R-HSA-391913;R-HSA-379048;R-HSA-420489;R-HSA-5672965;R-HSA-2179387;R-HSA-749456;R-HSA-744887;R-HSA-744886
R-HSA-977225	Amyloid fiber formation	1	80	1	176	0.00661157	0.328461	0.328461	6	25	0.00257918	48887	Homo sapiens	SAA1	P0DJI8	ABL1	P37840	R-HSA-976734;R-HSA-5660757;R-HSA-5661157;R-HSA-5658496;R-HSA-977136;R-HSA-5661161
R-HSA-5654743	Signaling by FGFR4	2	373	0	430	0.0308264	0.331709	0.331709	2	127	0.0131022	48887	Homo sapiens	FGFR3				R-HSA-2316434;R-HSA-5672965
R-HSA-5654741	Signaling by FGFR3	2	376	0	430	0.0310744	0.333483	0.333483	25	129	0.0133086	48887	Homo sapiens	FGFR3				R-HSA-5654416;R-HSA-5654224;R-HSA-5654623;R-HSA-5654148;R-HSA-5672965;R-HSA-5654222;R-HSA-5654413;R-HSA-5654408;R-HSA-5654409;R-HSA-5654646;R-HSA-5654647;R-HSA-5654640;R-HSA-5654705;R-HSA-2316434;R-HSA-5654631;R-HSA-5654628;R-HSA-5654565;R-HSA-190385;R-HSA-190263;R-HSA-190388;R-HSA-5654625;R-HSA-190261;R-HSA-5654637;R-HSA-5654634;R-HSA-5654633
R-HSA-5654736	Signaling by FGFR1	2	378	0	431	0.0312397	0.335256	0.335256	2	134	0.0138244	48887	Homo sapiens	FGFR3				R-HSA-2316434;R-HSA-5672965
R-HSA-422475	Axon guidance	3	594	1	814	0.0490909	0.338369	0.338369	6	285	0.0294027	48887	Homo sapiens	ABL1;FGFR3	P00519;P22607-2;P22607-1	ABL1	P00533	R-HSA-428885;R-HSA-5672965;R-HSA-428883;R-HSA-376141;R-HSA-445069;R-HSA-428888
R-HSA-1643685	Disease	5	1373	2	1246	0.113471	0.342195	0.342195	35	826	0.0852161	48887	Homo sapiens	ACY1;KPNA2;FGFR3	P22607-2;P22607;P22607-1;Q03154;P52292	ABL1;FGFR3	P08238;P00533	R-HSA-8853317;R-HSA-8853316;R-HSA-8853315;R-HSA-8853314;R-HSA-5655315;R-HSA-5655262;R-HSA-8853323;R-HSA-2033485;R-HSA-5655247;R-HSA-5655244;R-HSA-2033476;R-HSA-6791035;R-HSA-5579081;R-HSA-5655243;R-HSA-5655285;R-HSA-5655295;R-HSA-1176059;R-HSA-2012084;R-HSA-1247999;R-HSA-2012082;R-HSA-2038387;R-HSA-2038386;R-HSA-2400009;R-HSA-5655289;R-HSA-5655270;R-HSA-2077420;R-HSA-2012074;R-HSA-5336420;R-HSA-1…
R-HSA-1989781	PPARA activates gene expression	1	170	0	109	0.0140496	0.356057	0.356057	1	42	0.00433302	48887	Homo sapiens	NR1D1				R-HSA-1368065
R-HSA-1834949	Cytosolic sensors of pathogen-associated DNA	1	86	1	207	0.00710744	0.357096	0.357096	5	45	0.00464253	48887	Homo sapiens	SAA1	P0DJI8	ABL1	P35222	R-HSA-168166;R-HSA-3134904;R-HSA-3134901;R-HSA-3134883;R-HSA-3134914
R-HSA-168643	Nucleotide-binding domain, leucine rich repeat containing receptor (NLR) signaling pathways	0	65	1	233	0.0053719	0.358134	0.358134	1	44	0.00453936	48887	Homo sapiens			FGFR3	P08238	R-HSA-874087
R-HSA-6791312	TP53 Regulates Transcription of Cell Cycle Genes	0	64	1	231	0.00528926	0.35917	0.35917	2	39	0.00402352	48887	Homo sapiens			ABL1	P31947	R-HSA-6803890;R-HSA-6803871
R-HSA-73894	DNA Repair	2	346	0	545	0.028595	0.359372	0.359372	4	305	0.031466	48887	Homo sapiens	ABL1;KPNA2				R-HSA-5684006;R-HSA-5686578;R-HSA-5686587;R-HSA-5684008
R-HSA-5654738	Signaling by FGFR2	2	405	0	461	0.0334711	0.366966	0.366966	2	132	0.0136181	48887	Homo sapiens	FGFR3				R-HSA-2316434;R-HSA-5672965
R-HSA-5358351	Signaling by Hedgehog	0	165	1	130	0.0136364	0.367401	0.367401	1	82	0.00845971	48887	Homo sapiens			ABL1	Q4KMG0	R-HSA-5632652
R-HSA-400206	Regulation of lipid metabolism by Peroxisome proliferator-activated receptor alpha (PPARalpha)	1	173	0	125	0.0142975	0.371479	0.371479	1	45	0.00464253	48887	Homo sapiens	NR1D1				R-HSA-1368065
R-HSA-190236	Signaling by FGFR	2	413	0	462	0.0341322	0.372207	0.372207	25	225	0.0232126	48887	Homo sapiens	FGFR3				R-HSA-5654416;R-HSA-5654224;R-HSA-5654623;R-HSA-5654148;R-HSA-5672965;R-HSA-5654222;R-HSA-5654413;R-HSA-5654408;R-HSA-5654409;R-HSA-5654646;R-HSA-5654647;R-HSA-5654640;R-HSA-5654705;R-HSA-2316434;R-HSA-5654631;R-HSA-5654628;R-HSA-5654565;R-HSA-190385;R-HSA-190263;R-HSA-190388;R-HSA-5654625;R-HSA-190261;R-HSA-5654637;R-HSA-5654634;R-HSA-5654633
R-HSA-5693565	Recruitment and ATM-mediated phosphorylation of repair and signaling proteins at DNA double strand breaks	1	66	0	242	0.00545455	0.372495	0.372495	1	35	0.00361085	48887	Homo sapiens	ABL1				R-HSA-5686578
R-HSA-2029482	Regulation of actin dynamics for phagocytic cup formation	1	225	0	84	0.018595	0.375532	0.375532	1	24	0.00247601	48887	Homo sapiens	ABL1				R-HSA-2130194
R-HSA-983695	Antigen activates B Cell Receptor (BCR) leading to generation of second messengers	0	177	1	126	0.0146281	0.377548	0.377548	1	17	0.00175384	48887	Homo sapiens			ABL1	P15498	R-HSA-983704
R-HSA-975138	TRAF6 mediated induction of NFkB and MAP kinases upon TLR7/8 or 9 activation	1	93	0	236	0.00768595	0.379559	0.379559	1	47	0.00484886	48887	Homo sapiens	SAA1				R-HSA-168166
R-HSA-168928	RIG-I/MDA5 mediated induction of IFN-alpha/beta pathways	1	87	1	231	0.00719008	0.380562	0.380562	3	46	0.00474569	48887	Homo sapiens	SAA1	P0DJI8	ABL1	Q7Z434	R-HSA-168166;R-HSA-936564;R-HSA-168909
R-HSA-975871	MyD88 cascade initiated on plasma membrane	1	91	0	250	0.00752066	0.38853	0.38853	1	57	0.00588053	48887	Homo sapiens	SAA1				R-HSA-168166
R-HSA-168176	Toll Like Receptor 5 (TLR5) Cascade	1	91	0	250	0.00752066	0.38853	0.38853	1	58	0.0059837	48887	Homo sapiens	SAA1				R-HSA-168166
R-HSA-168142	Toll Like Receptor 10 (TLR10) Cascade	1	91	0	250	0.00752066	0.38853	0.38853	1	58	0.0059837	48887	Homo sapiens	SAA1				R-HSA-168166
R-HSA-3769402	Deactivation of the beta-catenin transactivating complex	0	44	1	282	0.00363636	0.390507	0.390507	5	14	0.00144434	48887	Homo sapiens			ABL1	P35222;P63104	R-HSA-5368580;R-HSA-3772430;R-HSA-3769393;R-HSA-3769383;R-HSA-5626938
R-HSA-73923	Lipid digestion, mobilization, and transport	0	149	1	169	0.012314	0.39346	0.39346	1	108	0.0111421	48887	Homo sapiens			NR1D1	P06727	R-HSA-174741
R-HSA-187037	NGF signalling via TRKA from the plasma membrane	2	419	2	503	0.0346281	0.393595	0.393595	6	141	0.0145466	48887	Homo sapiens	FGFR3	P22607-2;P22607-1	CSF3R;ABL1	P40763;P46109;P31946;Q13905	R-HSA-170978;R-HSA-2316434;R-HSA-5672965;R-HSA-170975;R-HSA-169901;R-HSA-198732
R-HSA-975155	MyD88 dependent cascade initiated on endosome	1	95	0	259	0.00785124	0.401269	0.401269	1	62	0.00639637	48887	Homo sapiens	SAA1				R-HSA-168166
R-HSA-168181	Toll Like Receptor 7/8 (TLR7/8) Cascade	1	95	0	259	0.00785124	0.401269	0.401269	1	63	0.00649954	48887	Homo sapiens	SAA1				R-HSA-168166
R-HSA-168138	Toll Like Receptor 9 (TLR9) Cascade	1	98	0	259	0.00809917	0.404172	0.404172	1	66	0.00680904	48887	Homo sapiens	SAA1				R-HSA-168166
R-HSA-168254	Influenza Infection	1	195	0	144	0.0161157	0.405137	0.405137	2	60	0.00619003	48887	Homo sapiens	KPNA2				R-HSA-1176059;R-HSA-6791035
R-HSA-418594	G alpha (i) signalling events	1	325	0	0	0.0268595	0.4061	0.4061	3	8	0.000825338	48887	Homo sapiens	SAA1				R-HSA-749454;R-HSA-749456;R-HSA-380073
R-HSA-2454202	Fc epsilon receptor (FCERI) signaling	2	557	0	392	0.0460331	0.406748	0.406748	2	133	0.0137212	48887	Homo sapiens	FGFR3				R-HSA-2316434;R-HSA-5672965
R-HSA-168249	Innate Immune System	4	1079	2	1181	0.0891736	0.407372	0.407372	13	636	0.0656144	48887	Homo sapiens	ABL1;SAA1;FGFR3	P00519;P22607-2;P22607-1;P0DJI8	ABL1;FGFR3	P08238;Q7Z434;P35222	R-HSA-168166;R-HSA-874087;R-HSA-3134883;R-HSA-3134914;R-HSA-168909;R-HSA-879362;R-HSA-2316434;R-HSA-2130194;R-HSA-5672965;R-HSA-3134904;R-HSA-3134901;R-HSA-936564;R-HSA-879411
R-HSA-177929	Signaling by EGFR	2	392	1	572	0.0323967	0.415828	0.415828	3	136	0.0140307	48887	Homo sapiens	FGFR3	P22607-2;P22607-1	ABL1	P00533	R-HSA-2316434;R-HSA-5672965;R-HSA-177942
R-HSA-983231	Factors involved in megakaryocyte development and platelet production	1	173	0	182	0.0142975	0.416599	0.416599	1	42	0.00433302	48887	Homo sapiens	ABL1				R-HSA-1013833
R-HSA-166058	MyD88:Mal cascade initiated on plasma membrane	1	107	0	268	0.00884298	0.418488	0.418488	1	62	0.00639637	48887	Homo sapiens	SAA1				R-HSA-168166
R-HSA-168188	Toll Like Receptor TLR6:TLR2 Cascade	1	107	0	269	0.00884298	0.419431	0.419431	1	64	0.0066027	48887	Homo sapiens	SAA1				R-HSA-168166
R-HSA-168179	Toll Like Receptor TLR1:TLR2 Cascade	1	110	0	269	0.00909091	0.42225	0.42225	1	64	0.0066027	48887	Homo sapiens	SAA1				R-HSA-168166
R-HSA-181438	Toll Like Receptor 2 (TLR2) Cascade	1	110	0	269	0.00909091	0.42225	0.42225	1	66	0.00680904	48887	Homo sapiens	SAA1				R-HSA-168166
R-HSA-5693567	HDR through Homologous Recombination (HR) or Single Strand Annealing (SSA)	1	124	0	260	0.0102479	0.429703	0.429703	1	42	0.00433302	48887	Homo sapiens	ABL1				R-HSA-5686587
R-HSA-5693538	Homology Directed Repair	1	130	0	262	0.0107438	0.433395	0.433395	1	50	0.00515836	48887	Homo sapiens	ABL1				R-HSA-5686587
R-HSA-1500620	Meiosis	0	94	1	286	0.0077686	0.43889	0.43889	2	14	0.00144434	48887	Homo sapiens			ABL1	O43196	R-HSA-912429;R-HSA-912496
R-HSA-2029480	Fcgamma receptor (FCGR) dependent phagocytosis	1	260	0	133	0.0214876	0.450621	0.450621	1	42	0.00433302	48887	Homo sapiens	ABL1				R-HSA-2130194
R-HSA-937061	TRIF-mediated TLR3/TLR4 signaling	1	108	0	316	0.00892562	0.455956	0.455956	1	57	0.00588053	48887	Homo sapiens	SAA1				R-HSA-168166
R-HSA-166166	MyD88-independent TLR3/TLR4 cascade	1	108	0	316	0.00892562	0.455956	0.455956	1	60	0.00619003	48887	Homo sapiens	SAA1				R-HSA-168166
R-HSA-168164	Toll Like Receptor 3 (TLR3) Cascade	1	108	0	319	0.00892562	0.458605	0.458605	1	61	0.0062932	48887	Homo sapiens	SAA1				R-HSA-168166
R-HSA-450531	Regulation of mRNA stability by proteins that bind AU-rich elements	0	91	1	340	0.00752066	0.487773	0.487773	4	26	0.00268235	48887	Homo sapiens			ABL1	P31946;P63104	R-HSA-450406;R-HSA-482788;R-HSA-450620;R-HSA-450394
R-HSA-201722	Formation of the beta-catenin:TCF transactivating complex	0	66	1	381	0.00545455	0.496883	0.496883	1	13	0.00134117	48887	Homo sapiens			ABL1	P35222	R-HSA-3299569
R-HSA-166054	Activated TLR4 signalling	1	128	0	351	0.0105785	0.497704	0.497704	1	85	0.00876921	48887	Homo sapiens	SAA1				R-HSA-168166
R-HSA-373076	Class A/1 (Rhodopsin-like receptors)	1	399	0	31	0.0329752	0.498523	0.498523	1	138	0.0142371	48887	Homo sapiens	SAA1				R-HSA-391913
R-HSA-166520	Signalling by NGF	2	502	2	653	0.0414876	0.505494	0.505494	6	195	0.0201176	48887	Homo sapiens	FGFR3	P22607-2;P22607-1	CSF3R;ABL1	P40763;P46109;P31946;Q13905	R-HSA-170978;R-HSA-2316434;R-HSA-5672965;R-HSA-170975;R-HSA-169901;R-HSA-198732
R-HSA-556833	Metabolism of lipids and lipoproteins	3	1312	1	425	0.10843	0.516844	0.516844	5	853	0.0880017	48887	Homo sapiens	ASAH2;HPGD;NR1D1	P20393;Q9NR71;P15428	NR1D1	P06727	R-HSA-2161779;R-HSA-1368065;R-HSA-174741;R-HSA-2161662;R-HSA-1606583
R-HSA-166016	Toll Like Receptor 4 (TLR4) Cascade	1	141	0	372	0.0116529	0.521729	0.521729	1	94	0.00969772	48887	Homo sapiens	SAA1				R-HSA-168166
R-HSA-8848021	Signaling by PTK6	0	80	1	409	0.00661157	0.528719	0.528719	3	52	0.0053647	48887	Homo sapiens			CSF3R	P40763	R-HSA-8848087;R-HSA-2730595;R-HSA-8848124
R-HSA-71387	Metabolism of carbohydrates	1	436	0	48	0.0360331	0.53713	0.53713	1	229	0.0236253	48887	Homo sapiens	CHST2				R-HSA-2046222
R-HSA-388396	GPCR downstream signaling	2	1113	0	45	0.0919835	0.553806	0.553806	9	64	0.0066027	48887	Homo sapiens	PTH;SAA1				R-HSA-379044;R-HSA-749448;R-HSA-749454;R-HSA-749452;R-HSA-749456;R-HSA-744887;R-HSA-380073;R-HSA-744886;R-HSA-379048
R-HSA-373760	L1CAM interactions	0	125	1	391	0.0103306	0.554254	0.554254	1	53	0.00546786	48887	Homo sapiens			ABL1	P00533	R-HSA-445069
R-HSA-168898	Toll-Like Receptors Cascades	1	180	0	383	0.014876	0.559343	0.559343	1	161	0.0166099	48887	Homo sapiens	SAA1				R-HSA-168166
R-HSA-195258	RHO GTPase Effectors	1	307	0	253	0.0253719	0.57288	0.57288	1	103	0.0106262	48887	Homo sapiens	ABL1				R-HSA-2130194
R-HSA-211859	Biological oxidations	1	522	0	11	0.0431405	0.577071	0.577071	1	175	0.0180543	48887	Homo sapiens	ACY1				R-HSA-5433074
R-HSA-535734	Fatty acid, triacylglycerol, and ketone body metabolism	1	410	0	135	0.0338843	0.579843	0.579843	1	144	0.0148561	48887	Homo sapiens	NR1D1				R-HSA-1368065
R-HSA-3108232	SUMO E3 ligases SUMOylate target proteins	0	103	1	493	0.0085124	0.598105	0.598105	1	46	0.00474569	48887	Homo sapiens			ABL1	P11387	R-HSA-4641362
R-HSA-1430728	Metabolism	6	3351	1	645	0.276942	0.612154	0.612154	10	2062	0.212731	48887	Homo sapiens	ATP5B;ASAH2;HPGD;ACY1;NR1D1;CHST2	Q9Y4C5;P20393;Q9NR71;Q03154;P15428;P06576	NR1D1	P06727	R-HSA-164834;R-HSA-5433074;R-HSA-2046222;R-HSA-164832;R-HSA-2161779;R-HSA-1368065;R-HSA-174741;R-HSA-164840;R-HSA-2161662;R-HSA-1606583
R-HSA-2990846	SUMOylation	0	111	1	528	0.00917355	0.623145	0.623145	1	55	0.0056742	48887	Homo sapiens			ABL1	P11387	R-HSA-4641362
R-HSA-913531	Interferon Signaling	1	291	0	340	0.0240496	0.627479	0.627479	1	50	0.00515836	48887	Homo sapiens	KPNA2				R-HSA-1176059
R-HSA-194315	Signaling by Rho GTPases	1	422	0	253	0.034876	0.643749	0.643749	1	108	0.0111421	48887	Homo sapiens	ABL1				R-HSA-2130194
R-HSA-1266738	Developmental Biology	3	931	2	1280	0.0769421	0.645879	0.645879	12	438	0.0451872	48887	Homo sapiens	ABL1;FGFR3	P00519;P22607-2;P22607-1	CSF3R;ABL1	P40763;Q4KMG0;P00533	R-HSA-448951;R-HSA-428885;R-HSA-5672965;R-HSA-428883;R-HSA-452515;R-HSA-449200;R-HSA-375138;R-HSA-448958;R-HSA-376141;R-HSA-448957;R-HSA-445069;R-HSA-428888
R-HSA-76002	Platelet activation, signaling and aggregation	0	305	1	386	0.0252066	0.647272	0.647272	2	114	0.0117611	48887	Homo sapiens			ABL1	P15498;P46108	R-HSA-442273;R-HSA-372697
R-HSA-201681	TCF dependent signaling in response to WNT	0	215	1	674	0.0177686	0.743472	0.743472	8	71	0.00732487	48887	Homo sapiens			ABL1	P35222;P63104	R-HSA-3299569;R-HSA-5368580;R-HSA-201669;R-HSA-201685;R-HSA-3772430;R-HSA-3769393;R-HSA-3769383;R-HSA-5626938
R-HSA-1280218	Adaptive Immune System	2	1144	1	733	0.0945455	0.777567	0.777567	3	260	0.0268235	48887	Homo sapiens	FGFR3	P22607-2;P22607-1	ABL1	P15498	R-HSA-2316434;R-HSA-983704;R-HSA-389352
R-HSA-5653656	Vesicle-mediated transport	1	797	0	388	0.0658678	0.835418	0.835418	2	214	0.0220778	48887	Homo sapiens	SAA1				R-HSA-2512800;R-HSA-2197646
R-HSA-195721	Signaling by Wnt	0	329	1	845	0.0271901	0.838209	0.838209	8	153	0.0157846	48887	Homo sapiens			ABL1	P35222;P63104	R-HSA-3299569;R-HSA-5368580;R-HSA-201669;R-HSA-201685;R-HSA-3772430;R-HSA-3769393;R-HSA-3769383;R-HSA-5626938
R-HSA-5663205	Infectious disease	1	508	1	670	0.0419835	0.841498	0.841498	3	311	0.032085	48887	Homo sapiens	KPNA2	P52292	FGFR3	P08238	R-HSA-5336420;R-HSA-1176059;R-HSA-6791035
R-HSA-3700989	Transcriptional Regulation by TP53	0	476	1	769	0.0393388	0.850217	0.850217	2	248	0.0255855	48887	Homo sapiens			ABL1	P31947	R-HSA-6803890;R-HSA-6803871
R-HSA-109582	Hemostasis	1	649	1	724	0.0536364	0.877573	0.877573	3	311	0.032085	48887	Homo sapiens	ABL1	P00519	ABL1	P15498;P46108	R-HSA-1013833;R-HSA-442273;R-HSA-372697
R-HSA-1640170	Cell Cycle	0	638	1	920	0.0527273	0.894922	0.894922	2	376	0.0387909	48887	Homo sapiens			ABL1	O43196	R-HSA-912429;R-HSA-912496
R-HSA-597592	Post-translational protein modification	0	1001	1	798	0.0827273	0.937497	0.937497	1	348	0.0359022	48887	Homo sapiens			ABL1	P11387	R-HSA-4641362
R-HSA-392499	Metabolism of proteins	2	1656	1	1226	0.13686	0.940239	0.940239	11	625	0.0644795	48887	Homo sapiens	ATP5B;SAA1	P0DJI8;P06576	ABL1	P37840;P11387	R-HSA-976734;R-HSA-5660757;R-HSA-5661157;R-HSA-4641362;R-HSA-1268022;R-HSA-5658496;R-HSA-1299476;R-HSA-1299482;R-HSA-1299487;R-HSA-977136;R-HSA-5661161
R-HSA-162582	Signal Transduction	5	2837	2	2819	0.234463	0.9424	0.9424	64	1781	0.183741	48887	Homo sapiens	PTH;ABL1;SAA1;FGFR3	P00519;P01270;P22607-2;P22607-1;P0DJI8	CSF3R;ABL1	P15498;P40763;P46109;P46108;Q4KMG0;P31946;P00533;Q13905;Q15464;P35222;P63104	R-HSA-109699;R-HSA-749448;R-HSA-749454;R-HSA-5654224;R-HSA-749452;R-HSA-3769393;R-HSA-5654623;R-HSA-420489;R-HSA-177942;R-HSA-5654222;R-HSA-2179387;R-HSA-749456;R-HSA-3769383;R-HSA-5654646;R-HSA-379044;R-HSA-5654647;R-HSA-5654640;R-HSA-380073;R-HSA-379048;R-HSA-5672824;R-HSA-169901;R-HSA-2316434;R-HSA-5654631;R-HSA-2130194;R-HSA-5654628;R-HSA-190385;R-HSA-190263;R-HSA-190388;R-HSA-3772430;R-HSA-5…
R-HSA-212436	Generic Transcription Pathway	1	1032	1	1500	0.0852893	0.981815	0.981815	3	342	0.0352832	48887	Homo sapiens	NR1D1	P20393	ABL1	P31947	R-HSA-6803890;R-HSA-376419;R-HSA-6803871
R-HSA-74160	Gene Expression	1	2085	1	2293	0.172314	0.999068	0.999068	7	768	0.0792324	48887	Homo sapiens	NR1D1	P20393	ABL1	P31947;P31946;P63104	R-HSA-450406;R-HSA-482788;R-HSA-6803890;R-HSA-376419;R-HSA-6803871;R-HSA-450620;R-HSA-450394
Rat Reactome Output
Pathway identifier	Pathway name	Species name	Submitted entities found	Mapped entities	Found reaction identifiers
R-RNO-428890	Role of Abl in Robo-Slit signaling	Rattus norvegicus	ABL1		R-RNO-376141;R-RNO-428888
R-RNO-376176	Signaling by Robo receptor	Rattus norvegicus	ABL1		R-RNO-376141;R-RNO-428888
R-RNO-190371	FGFR3b ligand binding and activation	Rattus norvegicus	FGFR3		R-RNO-190263;R-RNO-190385
R-RNO-5693606	DNA Double Strand Break Response	Rattus norvegicus	ABL1;KPNA2		R-RNO-5686578;R-RNO-5684008;R-RNO-5684006
R-RNO-375170	CDO in myogenesis	Rattus norvegicus	ABL1		R-RNO-448958
R-RNO-525793	Myogenesis	Rattus norvegicus	ABL1		R-RNO-448958
R-RNO-190239	FGFR3 ligand binding and activation	Rattus norvegicus	FGFR3		R-RNO-190263;R-RNO-190385;R-RNO-190388;R-RNO-190261
R-RNO-190372	FGFR3c ligand binding and activation	Rattus norvegicus	FGFR3		R-RNO-190388;R-RNO-190261
R-RNO-5663213	RHO GTPases Activate WASPs and WAVEs	Rattus norvegicus	ABL1		R-RNO-2130194
R-RNO-5685938	HDR through Single Strand Annealing (SSA)	Rattus norvegicus	ABL1		R-RNO-5686587
R-RNO-5654704	SHC-mediated cascade:FGFR3	Rattus norvegicus	FGFR3		R-RNO-5654625;R-RNO-5654646;R-RNO-5654647;R-RNO-5654634
R-RNO-5669034	TNFs bind their physiological receptors	Rattus norvegicus	LTA;EDA2R		R-RNO-5669097;R-RNO-5669013
R-RNO-5693565	Recruitment and ATM-mediated phosphorylation of repair and signaling proteins at DNA double strand breaks	Rattus norvegicus	ABL1		R-RNO-5686578
R-RNO-5654732	Negative regulation of FGFR3 signaling	Rattus norvegicus	FGFR3		R-RNO-5654565
R-RNO-8854691	Interleukin-19, 20, 22, 24	Rattus norvegicus	IL20RA		R-RNO-448728;R-RNO-448744
R-RNO-2029482	Regulation of actin dynamics for phagocytic cup formation	Rattus norvegicus	ABL1		R-RNO-2130194
R-RNO-5693548	Sensing of DNA Double Strand Breaks	Rattus norvegicus	KPNA2		R-RNO-5684008;R-RNO-5684006
R-RNO-5693567	HDR through Homologous Recombination (HR) or Single Strand Annealing (SSA)	Rattus norvegicus	ABL1		R-RNO-5686587
R-RNO-5693538	Homology Directed Repair	Rattus norvegicus	ABL1		R-RNO-5686587
R-RNO-2029480	Fcgamma receptor (FCGR) dependent phagocytosis	Rattus norvegicus	ABL1		R-RNO-2130194
R-RNO-2151201	Transcriptional activation of mitochondrial biogenesis	Rattus norvegicus	ATP5B		R-RNO-1592247
R-RNO-1592230	Mitochondrial biogenesis	Rattus norvegicus	ATP5B		R-RNO-1592247
R-RNO-2142700	Synthesis of Lipoxins (LX)	Rattus norvegicus	HPGD		R-RNO-2161779
R-RNO-5654227	Phospholipase C-mediated cascade; FGFR3	Rattus norvegicus	FGFR3		R-RNO-5654224;R-RNO-5654222;R-RNO-5654148
R-RNO-5693532	DNA Double-Strand Break Repair	Rattus norvegicus	ABL1;KPNA2		R-RNO-5686587;R-RNO-5686578;R-RNO-5684008;R-RNO-5684006
R-RNO-5676594	TNF receptor superfamily (TNFSF) members mediating non-canonical NF-kB pathway	Rattus norvegicus	LTA		R-RNO-5676593;R-RNO-5676591
R-RNO-163210	Formation of ATP by chemiosmotic coupling	Rattus norvegicus	ATP5B		R-RNO-164832;R-RNO-164834;R-RNO-164840
R-RNO-383280	Nuclear Receptor transcription pathway	Rattus norvegicus	NR1D1		R-RNO-376419
R-RNO-2022854	Keratan sulfate biosynthesis	Rattus norvegicus	CHST2		R-RNO-2046222
R-RNO-5423646	Aflatoxin activation and detoxification	Rattus norvegicus	ACY1		R-RNO-5433074
R-RNO-109704	PI3K Cascade	Rattus norvegicus	FGFR3		R-RNO-109699
R-RNO-5668541	TNFR2 non-canonical NF-kB pathway	Rattus norvegicus	LTA;EDA2R		R-RNO-5668481;R-RNO-5669097;R-RNO-5676593;R-RNO-5668454;R-RNO-5669013;R-RNO-5676591;R-RNO-5668534;R-RNO-5668414
R-RNO-1638074	Keratan sulfate/keratin metabolism	Rattus norvegicus	CHST2		R-RNO-2046222
R-RNO-6811558	PI5P, PP2A and IER3 Regulate PI3K/AKT Signaling	Rattus norvegicus	FGFR3		R-RNO-2316434
R-RNO-373080	Class B/2 (Secretin family receptors)	Rattus norvegicus	PTH		R-RNO-420489
R-RNO-199418	Negative regulation of the PI3K/AKT network	Rattus norvegicus	FGFR3		R-RNO-2316434
R-RNO-1660662	Glycosphingolipid metabolism	Rattus norvegicus	ASAH2		R-RNO-1606583
R-RNO-5654710	PI-3K cascade:FGFR3	Rattus norvegicus	FGFR3		R-RNO-5654705;R-RNO-5654640;R-RNO-2316434;R-RNO-5654637
R-RNO-1257604	PIP3 activates AKT signaling	Rattus norvegicus	FGFR3		R-RNO-2316434
R-RNO-1250342	PI3K events in ERBB4 signaling	Rattus norvegicus	FGFR3		R-RNO-2316434
R-RNO-5654689	PI-3K cascade:FGFR1	Rattus norvegicus	FGFR3		R-RNO-2316434
R-RNO-5654695	PI-3K cascade:FGFR2	Rattus norvegicus	FGFR3		R-RNO-2316434
R-RNO-5654720	PI-3K cascade:FGFR4	Rattus norvegicus	FGFR3		R-RNO-2316434
R-RNO-198203	PI3K/AKT activation	Rattus norvegicus	FGFR3		R-RNO-2316434
R-RNO-180292	GAB1 signalosome	Rattus norvegicus	FGFR3		R-RNO-2316434
R-RNO-2730905	Role of LAT2/NTAL/LAB on calcium mobilization	Rattus norvegicus	FGFR3		R-RNO-2316434
R-RNO-73894	DNA Repair	Rattus norvegicus	ABL1;KPNA2		R-RNO-5686587;R-RNO-5686578;R-RNO-5684008;R-RNO-5684006
R-RNO-195258	RHO GTPase Effectors	Rattus norvegicus	ABL1		R-RNO-2130194
R-RNO-449147	Signaling by Interleukins	Rattus norvegicus	CSF3R;IL20RA;FGFR3;IL18BP		R-RNO-6787737;R-RNO-448728;R-RNO-448744;R-RNO-8854738;R-RNO-8848392;R-RNO-5672965
R-RNO-1280215	Cytokine Signaling in Immune system	Rattus norvegicus	CSF3R;LTA;IL20RA;FGFR3;EDA2R;IL18BP		R-RNO-6787737;R-RNO-448728;R-RNO-5668481;R-RNO-448744;R-RNO-5669097;R-RNO-5676593;R-RNO-5668454;R-RNO-5676591;R-RNO-5668414;R-RNO-5672965;R-RNO-8854738;R-RNO-5669013;R-RNO-8848392;R-RNO-5668534
R-RNO-163200	Respiratory electron transport, ATP synthesis by chemiosmotic coupling, and heat production by uncoupling proteins.	Rattus norvegicus	ATP5B		R-RNO-164832;R-RNO-164834;R-RNO-164840
R-RNO-1168372	Downstream signaling events of B Cell Receptor (BCR)	Rattus norvegicus	FGFR3		R-RNO-2316434
R-RNO-418555	G alpha (s) signalling events	Rattus norvegicus	PTH		R-RNO-744887;R-RNO-379044;R-RNO-744886
R-RNO-2142753	Arachidonic acid metabolism	Rattus norvegicus	HPGD		R-RNO-2161779
R-RNO-428157	Sphingolipid metabolism	Rattus norvegicus	ASAH2		R-RNO-1606583
R-RNO-5673001	RAF/MAP kinase cascade	Rattus norvegicus	FGFR3		R-RNO-5672965
R-RNO-179812	GRB2 events in EGFR signaling	Rattus norvegicus	FGFR3		R-RNO-5672965
R-RNO-180336	SHC1 events in EGFR signaling	Rattus norvegicus	FGFR3		R-RNO-5672965
R-RNO-1250347	SHC1 events in ERBB4 signaling	Rattus norvegicus	FGFR3		R-RNO-5672965
R-RNO-5654706	FRS-mediated FGFR3 signaling	Rattus norvegicus	FGFR3		R-RNO-5654413;R-RNO-5654416;R-RNO-5654633;R-RNO-5654631;R-RNO-5654628;R-RNO-5654408;R-RNO-5654409;R-RNO-5654623;R-RNO-5672965
R-RNO-5654712	FRS-mediated FGFR4 signaling	Rattus norvegicus	FGFR3		R-RNO-5672965
R-RNO-5654700	FRS-mediated FGFR2 signaling	Rattus norvegicus	FGFR3		R-RNO-5672965
R-RNO-5654693	FRS-mediated FGFR1 signaling	Rattus norvegicus	FGFR3		R-RNO-5672965
R-RNO-112412	SOS-mediated signalling	Rattus norvegicus	FGFR3		R-RNO-5672965
R-RNO-5684996	MAPK1/MAPK3 signaling	Rattus norvegicus	FGFR3		R-RNO-5672965
R-RNO-2586552	Signaling by Leptin	Rattus norvegicus	FGFR3		R-RNO-5672965
R-RNO-187706	Signalling to p38 via RIT and RIN	Rattus norvegicus	FGFR3		R-RNO-5672965
R-RNO-983705	Signaling by the B Cell Receptor (BCR)	Rattus norvegicus	FGFR3		R-RNO-2316434
R-RNO-912526	Interleukin receptor SHC signaling	Rattus norvegicus	FGFR3		R-RNO-5672965
R-RNO-170984	ARMS-mediated activation	Rattus norvegicus	FGFR3		R-RNO-5672965
R-RNO-170968	Frs2-mediated activation	Rattus norvegicus	FGFR3		R-RNO-5672965
R-RNO-422475	Axon guidance	Rattus norvegicus	ABL1;FGFR3		R-RNO-376141;R-RNO-428888;R-RNO-5672965
R-RNO-169893	Prolonged ERK activation events	Rattus norvegicus	FGFR3		R-RNO-5672965
R-RNO-451927	Interleukin-2 signaling	Rattus norvegicus	FGFR3		R-RNO-5672965
R-RNO-375165	NCAM signaling for neurite out-growth	Rattus norvegicus	FGFR3		R-RNO-5672965
R-RNO-167044	Signalling to RAS	Rattus norvegicus	FGFR3		R-RNO-5672965
R-RNO-2871796	FCERI mediated MAPK activation	Rattus norvegicus	FGFR3		R-RNO-5672965
R-RNO-8853659	RET signaling	Rattus norvegicus	FGFR3		R-RNO-5672965
R-RNO-5218921	VEGFR2 mediated cell proliferation	Rattus norvegicus	FGFR3		R-RNO-5672965
R-RNO-512988	Interleukin-3, 5 and GM-CSF signaling	Rattus norvegicus	FGFR3		R-RNO-5672965
R-RNO-1630316	Glycosaminoglycan metabolism	Rattus norvegicus	CHST2		R-RNO-2046222
R-RNO-187687	Signalling to ERKs	Rattus norvegicus	FGFR3		R-RNO-5672965
R-RNO-5683057	MAPK family signaling cascades	Rattus norvegicus	FGFR3		R-RNO-5672965
R-RNO-1428517	The citric acid (TCA) cycle and respiratory electron transport	Rattus norvegicus	ATP5B		R-RNO-164832;R-RNO-164834;R-RNO-164840
R-RNO-112399	IRS-mediated signalling	Rattus norvegicus	FGFR3		R-RNO-109699;R-RNO-5672965
R-RNO-2428928	IRS-related events triggered by IGF1R	Rattus norvegicus	FGFR3		R-RNO-109699;R-RNO-5672965
R-RNO-2428924	IGF1R signaling cascade	Rattus norvegicus	FGFR3		R-RNO-109699;R-RNO-5672965
R-RNO-2404192	Signaling by Type 1 Insulin-like Growth Factor 1 Receptor (IGF1R)	Rattus norvegicus	FGFR3		R-RNO-109699;R-RNO-5672965
R-RNO-1266738	Developmental Biology	Rattus norvegicus	ABL1;FGFR3		R-RNO-376141;R-RNO-448958;R-RNO-428888;R-RNO-5672965
R-RNO-74751	Insulin receptor signalling cascade	Rattus norvegicus	FGFR3		R-RNO-109699;R-RNO-5672965
R-RNO-194315	Signaling by Rho GTPases	Rattus norvegicus	ABL1		R-RNO-2130194
R-RNO-74752	Signaling by Insulin receptor	Rattus norvegicus	FGFR3		R-RNO-109699;R-RNO-5672965
R-RNO-1433557	Signaling by SCF-KIT	Rattus norvegicus	FGFR3		R-RNO-2316434;R-RNO-5672965
R-RNO-5654708	Downstream signaling of activated FGFR3	Rattus norvegicus	FGFR3		R-RNO-5654646;R-RNO-5654647;R-RNO-5654640;R-RNO-5654148;R-RNO-5654637;R-RNO-5672965;R-RNO-5654634;R-RNO-5654413;R-RNO-5654416;R-RNO-5654633;R-RNO-5654631;R-RNO-5654224;R-RNO-5654625;R-RNO-5654705;R-RNO-5654222;R-RNO-5654628;R-RNO-5654408;R-RNO-5654409;R-RNO-5654623;R-RNO-2316434
R-RNO-5654696	Downstream signaling of activated FGFR2	Rattus norvegicus	FGFR3		R-RNO-2316434;R-RNO-5672965
R-RNO-5654716	Downstream signaling of activated FGFR4	Rattus norvegicus	FGFR3		R-RNO-2316434;R-RNO-5672965
R-RNO-5654687	Downstream signaling of activated FGFR1	Rattus norvegicus	FGFR3		R-RNO-2316434;R-RNO-5672965
R-RNO-5654743	Signaling by FGFR4	Rattus norvegicus	FGFR3		R-RNO-2316434;R-RNO-5672965
R-RNO-5654741	Signaling by FGFR3	Rattus norvegicus	FGFR3		R-RNO-5672965;R-RNO-5654633;R-RNO-5654631;R-RNO-5654625;R-RNO-190263;R-RNO-5654705;R-RNO-5654628;R-RNO-5654623;R-RNO-190261;R-RNO-5654646;R-RNO-5654565;R-RNO-5654647;R-RNO-5654640;R-RNO-190385;R-RNO-5654148;R-RNO-190388;R-RNO-5654637;R-RNO-5654634;R-RNO-5654413;R-RNO-5654416;R-RNO-5654224;R-RNO-5654222;R-RNO-5654408;R-RNO-5654409;R-RNO-2316434
R-RNO-5654736	Signaling by FGFR1	Rattus norvegicus	FGFR3		R-RNO-2316434;R-RNO-5672965
R-RNO-186763	Downstream signal transduction	Rattus norvegicus	FGFR3		R-RNO-2316434;R-RNO-5672965
R-RNO-4420097	VEGFA-VEGFR2 Pathway	Rattus norvegicus	FGFR3		R-RNO-5672965
R-RNO-2424491	DAP12 signaling	Rattus norvegicus	FGFR3		R-RNO-2316434;R-RNO-5672965
R-RNO-177929	Signaling by EGFR	Rattus norvegicus	FGFR3		R-RNO-2316434;R-RNO-5672965
R-RNO-194138	Signaling by VEGF	Rattus norvegicus	FGFR3		R-RNO-5672965
R-RNO-2172127	DAP12 interactions	Rattus norvegicus	FGFR3		R-RNO-2316434;R-RNO-5672965
R-RNO-1236394	Signaling by ERBB4	Rattus norvegicus	FGFR3		R-RNO-2316434;R-RNO-5672965
R-RNO-2454202	Fc epsilon receptor (FCERI) signaling	Rattus norvegicus	FGFR3		R-RNO-2316434;R-RNO-5672965
R-RNO-5654738	Signaling by FGFR2	Rattus norvegicus	FGFR3		R-RNO-2316434;R-RNO-5672965
R-RNO-186797	Signaling by PDGF	Rattus norvegicus	FGFR3		R-RNO-2316434;R-RNO-5672965
R-RNO-190236	Signaling by FGFR	Rattus norvegicus	FGFR3		R-RNO-5672965;R-RNO-5654633;R-RNO-5654631;R-RNO-5654625;R-RNO-190263;R-RNO-5654705;R-RNO-5654628;R-RNO-5654623;R-RNO-190261;R-RNO-5654646;R-RNO-5654565;R-RNO-5654647;R-RNO-5654640;R-RNO-190385;R-RNO-5654148;R-RNO-190388;R-RNO-5654637;R-RNO-5654634;R-RNO-5654413;R-RNO-5654416;R-RNO-5654224;R-RNO-5654222;R-RNO-5654408;R-RNO-5654409;R-RNO-2316434
R-RNO-187037	NGF signalling via TRKA from the plasma membrane	Rattus norvegicus	FGFR3		R-RNO-2316434;R-RNO-5672965
R-RNO-1852241	Organelle biogenesis and maintenance	Rattus norvegicus	ATP5B		R-RNO-1592247
R-RNO-212436	Generic Transcription Pathway	Rattus norvegicus	NR1D1		R-RNO-376419
R-RNO-881907	Gastrin-CREB signalling pathway via PKC and MAPK	Rattus norvegicus	FGFR3		R-RNO-5672965
R-RNO-168249	Innate Immune System	Rattus norvegicus	ABL1;FGFR3		R-RNO-2130194;R-RNO-2316434;R-RNO-5672965
R-RNO-166520	Signalling by NGF	Rattus norvegicus	FGFR3		R-RNO-2316434;R-RNO-5672965
R-RNO-71387	Metabolism of carbohydrates	Rattus norvegicus	CHST2		R-RNO-2046222
R-RNO-500792	GPCR ligand binding	Rattus norvegicus	PTH		R-RNO-420489
R-RNO-211859	Biological oxidations	Rattus norvegicus	ACY1		R-RNO-5433074
R-RNO-168256	Immune System	Rattus norvegicus	CSF3R;LTA;IL20RA;ABL1;FGFR3;EDA2R;IL18BP		R-RNO-6787737;R-RNO-448728;R-RNO-5668481;R-RNO-448744;R-RNO-2130194;R-RNO-5669097;R-RNO-5676593;R-RNO-5668454;R-RNO-5676591;R-RNO-5668414;R-RNO-5672965;R-RNO-8854738;R-RNO-5669013;R-RNO-8848392;R-RNO-5668534;R-RNO-2316434
R-RNO-1280218	Adaptive Immune System	Rattus norvegicus	FGFR3		R-RNO-2316434
R-RNO-556833	Metabolism of lipids and lipoproteins	Rattus norvegicus	ASAH2;HPGD		R-RNO-2161779;R-RNO-1606583
R-RNO-74160	Gene Expression	Rattus norvegicus	NR1D1		R-RNO-376419
R-RNO-372790	Signaling by GPCR	Rattus norvegicus	PTH;FGFR3		R-RNO-744887;R-RNO-379044;R-RNO-420489;R-RNO-744886;R-RNO-5672965
R-RNO-388396	GPCR downstream signaling	Rattus norvegicus	PTH		R-RNO-744887;R-RNO-379044;R-RNO-744886
R-RNO-162582	Signal Transduction	Rattus norvegicus	PTH;ABL1;FGFR3		R-RNO-2130194;R-RNO-744887;R-RNO-379044;R-RNO-744886;R-RNO-5672965;R-RNO-5654633;R-RNO-5654631;R-RNO-5654625;R-RNO-190263;R-RNO-5654705;R-RNO-5654628;R-RNO-420489;R-RNO-5654623;R-RNO-190261;R-RNO-5654646;R-RNO-5654565;R-RNO-5654647;R-RNO-5654640;R-RNO-190385;R-RNO-5654148;R-RNO-190388;R-RNO-5654637;R-RNO-5654634;R-RNO-5654413;R-RNO-5654416;R-RNO-5654224;R-RNO-5654222;R-RNO-5654408;R-RNO-5654409;R…
R-RNO-1430728	Metabolism	Rattus norvegicus	ATP5B;ASAH2;ACY1;HPGD;CHST2		R-RNO-2161779;R-RNO-5433074;R-RNO-1606583;R-RNO-164832;R-RNO-164834;R-RNO-164840;R-RNO-2046222

## Sheet: Group 3
Higher in 8 months as compared to 24 months		Group 3
SeqId	Full_Name	Rank	F Value	Pr > F	q	8m-18m	8m-24m	18m-24m	8m/18m	8m/24m	18m/24m	pair1	pair2	pair3	SomaId	Target	UniProt	EntrezGeneID	EntrezGeneSymbol
2765-4_3	Growth-differentiation factor 11	5	28.72	5.58e-07	9.47e-05	0.000854	3.9e-06	0.000954	0.35	0.692	0.342	8m-18m	8m-24m	18m-24m	SL004345	GDF-11	O95390	10220	GDF11
3196-6_2	Hyaluronan and proteoglycan link protein 1	11	21.25	5.93e-06	0.000457	0.000166	0.000197	0.597	0.427	0.452	0.025	8m-18m	8m-24m		SL008023	HPLN1	P10915	1404	HAPLN1
5076-53_2	EPH receptor A10	13	18.82	1.44e-05	0.00094	0.00476	1.61e-05	0.00756	0.148	0.269	0.121		8m-24m		SL014294	EPHAA	Q5JZY3	284656	EPHA10
3057-55_1	WNT1-inducible-signaling pathway protein 1	15	17.42	2.48e-05	0.0014	0.00303	6.01e-05	0.0162	0.337	0.534	0.197		8m-24m		SL004689	WISP-1	O95388	8840	WISP1
3292-75_1	CD48	16	16.61	3.44e-05	0.00183	0.000111	0.000199	0.158	0.077	0.105	0.028	8m-18m	8m-24m		SL010450	CD48	P09326	962	CD48
5308-89_2	Neutrophil elastase	17	15.15	6.35e-05	0.00317	0.00439	1.63e-05	0.0585	0.121	0.191	0.069		8m-24m		SL000401	Elastase	P08246	1991	ELANE
2974-61_2	Contactin-1	18	14.85	7.23e-05	0.00341	0.00685	0.00012	0.0146	0.217	0.413	0.196		8m-24m		SL004855	contactin-1	Q12860	1272	CNTN1
2687-2_1	Melanoma Inhibitory Activity	21	11.88	0.000285	0.0115	0.0133	0.000157	0.0403	0.368	0.657	0.289		8m-24m		SL001947	MIA	Q16674	8190	MIA
3823-9_1	Megakaryocyte-associated tyrosine-protein kinase	23	10.74	0.000508	0.0187	0.00249	0.000533	0.197	0.135	0.193	0.058		8m-24m		SL010505	MATK	P42679	4145	MATK
4278-14_3	Protein disulfide-isomerase	25	10.49	0.00058	0.0197	0.0678	0.000249	0.0134	0.135	0.309	0.174		8m-24m		SL004901	Protein disulfide-isomerase	P07237	5034	P4HB
4232-19_2	Insulin-like growth factor I receptor	26	10.2	0.000673	0.022	0.427	0.00224	0.000829	-0.072	0.304	0.376		8m-24m	18m-24m	SL003304	IGF-I sR	P08069	3480	IGF1R
5227-60_3	Pyruvate dehydrogenase kinase, isozyme 1	27	10.09	0.000714	0.0224	0.0726	0.000112	0.0245	0.05	0.124	0.073		8m-24m		SL006921	PDK1	Q15118	5163	PDK1
3798-71_1	Carbonic anhydrase IX	32	8.68	0.00156	0.0412	0.253	0.000532	0.00464	0.068	0.211	0.143		8m-24m		SL005508	Carbonic anhydrase 9	Q16790	768	CA9
4129-72_1	Complement factor B	33	8.44	0.00179	0.0459	0.0384	0.00198	0.0367	0.134	0.232	0.097		8m-24m		SL000414	Factor B	P00751	629	CFB
5107-7_2	Notch 1	34	8.26	0.00198	0.0493	0.0861	0.00123	0.02	0.171	0.362	0.191		8m-24m		SL005703	Notch 1	P46531	4851	NOTCH1
2848-2_2	Wnt inhibitory factor 1	43	7.25	0.00362	0.0713	0.0789	0.000551	0.0723	0.092	0.18	0.088		8m-24m		SL004652	WIF-1	Q9Y5W5	11197	WIF1
3535-84_1	Dickkopf-related protein 1	44	6.99	0.00425	0.0809	0.0177	0.000326	0.537	0.346	0.423	0.077		8m-24m		SL004367	DKK1	O94907	22943	DKK1
3340-53_1	Thrombospondin-4	55	6.51	0.00575	0.0887	0.156	0.00159	0.0495	0.157	0.405	0.248		8m-24m		SL007207	TSP4	P35443	7060	THBS4
3037-62_1	Interleukin-1beta	69	5.36	0.0123	0.151	0.129	0.00129	0.124	0.108	0.215	0.107		8m-24m		SL001795	IL-1b	P01584	3553	IL1B
4834-61_2	Ephrin type-A receptor 2	86	4.22	0.0275	0.267	0.833	0.00122	0.0396	0.01	0.108	0.098		8m-24m		SL002654	Epithelial cell kinase	P29317	1969	EPHA2
Reactome Output
Pathway identifier	Pathway name	#Entities found	#Entities total	#Interactors found	#Interactors total	Entities ratio	Entities pValue	Entities FDR	#Reactions found	#Reactions total	Reactions ratio	Species identifier	Species name	Submitted entities found	Mapped entities	Submitted entities hit interactor	Interacts with	Found reaction identifiers
R-HSA-5660668	CLEC7A/inflammasome pathway	3	8	0	20	0.000661157	1.79213e-05	0.00543016	2	4	0.000412669	48887	Homo sapiens	IL1B				R-HSA-5660663;R-HSA-5660622
R-HSA-3772470	Negative regulation of TCF-dependent signaling by WNT ligand antagonists	2	15	0	9	0.00123967	0.000835929	0.126225	3	5	0.000515836	48887	Homo sapiens	WIF1;DKK1				R-HSA-3769401;R-HSA-3769370;R-HSA-5368586
R-HSA-1912408	Pre-NOTCH Transcription and Translation	3	52	0	76	0.00429752	0.00175357	0.166619	7	20	0.00206334	48887	Homo sapiens	NOTCH1				R-HSA-1912412;R-HSA-1606682;R-HSA-1912363;R-HSA-4395227;R-HSA-1606561;R-HSA-4395231;R-HSA-1912416
R-HSA-3928663	EPHA-mediated growth cone collapse	2	39	0	1	0.00322314	0.00270504	0.166619	3	5	0.000515836	48887	Homo sapiens	EPHA10;EPHA2				R-HSA-3928651;R-HSA-3928602;R-HSA-3928648
R-HSA-5607764	CLEC7A (Dectin-1) signaling	4	120	0	222	0.00991736	0.00277698	0.166619	3	45	0.00464253	48887	Homo sapiens	IL1B;PDK1				R-HSA-5660663;R-HSA-202534;R-HSA-5660622
R-HSA-1912422	Pre-NOTCH Expression and Processing	3	76	0	94	0.00628099	0.00396244	0.198122	17	30	0.00309502	48887	Homo sapiens	NOTCH1				R-HSA-1912349;R-HSA-1912412;R-HSA-1606682;R-HSA-1912382;R-HSA-1912379;R-HSA-1912378;R-HSA-1912372;R-HSA-1912374;R-HSA-1912369;R-HSA-1912363;R-HSA-4395227;R-HSA-1606561;R-HSA-1912353;R-HSA-4395231;R-HSA-1912352;R-HSA-1912416;R-HSA-1912355
R-HSA-2122948	Activated NOTCH1 Transmits Signal to the Nucleus	2	31	0	28	0.00256198	0.00520242	0.223704	19	21	0.00216651	48887	Homo sapiens	NOTCH1;CNTN1				R-HSA-157632;R-HSA-1980122;R-HSA-157926;R-HSA-1980123;R-HSA-1980118;R-HSA-157353;R-HSA-1980112;R-HSA-373706;R-HSA-1980044;R-HSA-1980109;R-HSA-1912398;R-HSA-1980042;R-HSA-1980138;R-HSA-1980074;R-HSA-1980041;R-HSA-1980039;R-HSA-1980130;R-HSA-1980128;R-HSA-1912386
R-HSA-3928665	EPH-ephrin mediated repulsion of cells	2	54	0	15	0.00446281	0.00756288	0.272911	6	9	0.000928505	48887	Homo sapiens	EPHA10;EPHA2				R-HSA-4093327;R-HSA-3928607;R-HSA-3928604;R-HSA-3928642;R-HSA-3928660;R-HSA-3928628
R-HSA-1234158	Regulation of gene expression by Hypoxia-inducible Factor	2	14	0	68	0.00115702	0.00983402	0.272911	1	6	0.000619003	48887	Homo sapiens	CA9				R-HSA-1235035
R-HSA-157118	Signaling by NOTCH	4	153	0	325	0.0126446	0.0106441	0.272911	53	95	0.00980089	48887	Homo sapiens	NOTCH1;CNTN1				R-HSA-1912349;R-HSA-1606682;R-HSA-4396371;R-HSA-1980047;R-HSA-1980044;R-HSA-1980042;R-HSA-1980041;R-HSA-4396379;R-HSA-4395227;R-HSA-1980039;R-HSA-4395231;R-HSA-4396382;R-HSA-1912382;R-HSA-2974731;R-HSA-1912379;R-HSA-1912378;R-HSA-1912372;R-HSA-157353;R-HSA-1912374;R-HSA-1912369;R-HSA-1980078;R-HSA-2220816;R-HSA-1980074;R-HSA-1912363;R-HSA-1606561;R-HSA-1912353;R-HSA-1912352;R-HSA-1980067;R-HSA-19…
R-HSA-5621481	C-type lectin receptors (CLRs)	4	183	0	321	0.015124	0.0108845	0.272911	3	67	0.0069122	48887	Homo sapiens	IL1B;PDK1				R-HSA-5660663;R-HSA-202534;R-HSA-5660622
R-HSA-5083630	Defective LFNG causes SCDO3	1	6	0	0	0.000495868	0.0114345	0.272911	1	1	0.000103167	48887	Homo sapiens	NOTCH1				R-HSA-5096538
R-HSA-5339717	Misspliced LRP5 mutants have enhanced beta-catenin-dependent signaling	1	6	0	2	0.000495868	0.0152178	0.272911	1	1	0.000103167	48887	Homo sapiens	DKK1				R-HSA-5339711
R-HSA-173736	Alternative complement activation	1	6	0	3	0.000495868	0.0171042	0.272911	7	9	0.000928505	48887	Homo sapiens	CFB				R-HSA-183122;R-HSA-173745;R-HSA-183126;R-HSA-174551;R-HSA-173754;R-HSA-183130;R-HSA-173740
R-HSA-1912399	Pre-NOTCH Processing in the Endoplasmic Reticulum	1	10	0	0	0.000826446	0.0189872	0.272911	2	2	0.000206334	48887	Homo sapiens	NOTCH1				R-HSA-1912349;R-HSA-1912353
R-HSA-2644607	Loss of Function of FBXW7 in Cancer and NOTCH1 Signaling	1	6	0	5	0.000495868	0.0208666	0.272911	1	1	0.000103167	48887	Homo sapiens	NOTCH1				R-HSA-2220978
R-HSA-2644605	FBXW7 Mutants and NOTCH1 in Cancer	1	6	0	5	0.000495868	0.0208666	0.272911	1	1	0.000103167	48887	Homo sapiens	NOTCH1				R-HSA-2220978
R-HSA-448706	Interleukin-1 processing	1	7	0	5	0.000578512	0.0208666	0.272911	2	5	0.000515836	48887	Homo sapiens	IL1B				R-HSA-449058;R-HSA-448703
R-HSA-8866423	VLDL biosynthesis	1	9	0	2	0.000743802	0.0208666	0.272911	1	5	0.000515836	48887	Homo sapiens	P4HB				R-HSA-8866329
R-HSA-1234174	Regulation of Hypoxia-inducible Factor (HIF) by oxygen	2	34	0	99	0.00280992	0.0221528	0.272911	1	19	0.00196018	48887	Homo sapiens	CA9				R-HSA-1235035
R-HSA-2262749	Cellular response to hypoxia	2	34	0	99	0.00280992	0.0221528	0.272911	1	19	0.00196018	48887	Homo sapiens	CA9				R-HSA-1235035
R-HSA-165158	Activation of AKT2	1	7	0	5	0.000578512	0.0227426	0.272911	2	3	0.000309502	48887	Homo sapiens	PDK1				R-HSA-109701;R-HSA-109702
R-HSA-174577	Activation of C3 and C5	1	7	0	5	0.000578512	0.0227426	0.272911	2	3	0.000309502	48887	Homo sapiens	CFB				R-HSA-173680;R-HSA-166817
R-HSA-2660826	Constitutive Signaling by NOTCH1 t(7;9)(NOTCH1:M1580_K2555) Translocation Mutant	1	8	0	8	0.000661157	0.0264842	0.291326	5	5	0.000515836	48887	Homo sapiens	NOTCH1				R-HSA-2660815;R-HSA-2660816;R-HSA-2660819;R-HSA-2666278;R-HSA-2660822
R-HSA-2660825	Signaling by NOTCH1 t(7;9)(NOTCH1:M1580_K2555) Translocation Mutant	1	8	0	8	0.000661157	0.0264842	0.291326	5	5	0.000515836	48887	Homo sapiens	NOTCH1				R-HSA-2660815;R-HSA-2660816;R-HSA-2660819;R-HSA-2666278;R-HSA-2660822
R-HSA-2428933	SHC-related events triggered by IGF1R	1	15	0	0	0.00123967	0.0283498	0.302119	3	5	0.000515836	48887	Homo sapiens	IGF1R				R-HSA-2404193;R-HSA-2404195;R-HSA-5686072
R-HSA-2892245	POU5F1 (OCT4), SOX2, NANOG repress genes related to differentiation	1	10	0	6	0.000826446	0.0302119	0.302119	1	7	0.000722171	48887	Homo sapiens	DKK1				R-HSA-2972977
R-HSA-1475029	Reversible hydration of carbon dioxide	1	17	0	0	0.00140496	0.0320706	0.302734	2	8	0.000825338	48887	Homo sapiens	CA9				R-HSA-1475025;R-HSA-1475017
R-HSA-2691230	Signaling by NOTCH1 HD Domain Mutants in Cancer	1	16	0	8	0.00132231	0.0413126	0.302734	6	6	0.000619003	48887	Homo sapiens	NOTCH1				R-HSA-2691211;R-HSA-2691226;R-HSA-2691214;R-HSA-2737728;R-HSA-2730752;R-HSA-2691219
R-HSA-2691232	Constitutive Signaling by NOTCH1 HD Domain Mutants	1	16	0	8	0.00132231	0.0413126	0.302734	6	6	0.000619003	48887	Homo sapiens	NOTCH1				R-HSA-2691211;R-HSA-2691226;R-HSA-2691214;R-HSA-2737728;R-HSA-2730752;R-HSA-2691219
R-HSA-204174	Regulation of pyruvate dehydrogenase (PDH) complex	1	24	0	0	0.00198347	0.0449855	0.302734	1	2	0.000206334	48887	Homo sapiens	PDK1				R-HSA-203946
R-HSA-350054	Notch-HLH transcription pathway	1	13	0	16	0.00107438	0.0468168	0.302734	1	1	0.000103167	48887	Homo sapiens	NOTCH1				R-HSA-212356
R-HSA-2979096	NOTCH2 Activation and Transmission of Signal to the Nucleus	1	22	0	5	0.00181818	0.0504693	0.302734	2	11	0.00113484	48887	Homo sapiens	CNTN1				R-HSA-2220816;R-HSA-2974731
R-HSA-210744	Regulation of gene expression in late stage (branching morphogenesis) pancreatic bud precursor cells	1	7	0	23	0.000578512	0.0522905	0.302734	1	4	0.000412669	48887	Homo sapiens	NOTCH1				R-HSA-210834
R-HSA-422085	Synthesis, secretion, and deacylation of Ghrelin	0	24	1	6	0.00198347	0.0541083	0.302734	1	7	0.000722171	48887	Homo sapiens			IGF1R	P05019	R-HSA-422048
R-HSA-391160	Signal regulatory protein (SIRP) family interactions	0	18	1	16	0.0014876	0.0595416	0.302734	1	10	0.00103167	48887	Homo sapiens			MATK	Q14289	R-HSA-391152
R-HSA-444257	RSK activation	1	8	0	28	0.000661157	0.063147	0.302734	1	2	0.000206334	48887	Homo sapiens	PDK1				R-HSA-442739
R-HSA-1912420	Pre-NOTCH Processing in Golgi	1	23	0	18	0.00190083	0.0756612	0.302734	8	8	0.000825338	48887	Homo sapiens	NOTCH1				R-HSA-1912382;R-HSA-1912379;R-HSA-1912378;R-HSA-1912372;R-HSA-1912374;R-HSA-1912369;R-HSA-1912352;R-HSA-1912355
R-HSA-389357	CD28 dependent PI3K/Akt signaling	1	26	0	18	0.00214876	0.0774357	0.302734	3	9	0.000928505	48887	Homo sapiens	PDK1				R-HSA-2317314;R-HSA-198270;R-HSA-2316429
R-HSA-977606	Regulation of Complement cascade	1	30	0	13	0.00247934	0.079207	0.302734	7	32	0.00330135	48887	Homo sapiens	CFB				R-HSA-981535;R-HSA-977375;R-HSA-977629;R-HSA-977605;R-HSA-981621;R-HSA-977363;R-HSA-977619
R-HSA-74749	Signal attenuation	0	11	1	34	0.000909091	0.079207	0.302734	1	7	0.000722171	48887	Homo sapiens			IGF1R	Q13322	R-HSA-110011
R-HSA-8849472	PTK6 Down-Regulation	0	7	1	40	0.000578512	0.084501	0.302734	2	3	0.000309502	48887	Homo sapiens			IGF1R	P18031	R-HSA-8849428;R-HSA-8849435
R-HSA-75953	RNA Polymerase II Transcription Initiation	1	48	0	0	0.00396694	0.088014	0.302734	3	3	0.000309502	48887	Homo sapiens	MIA				R-HSA-75861;R-HSA-75864;R-HSA-75866
R-HSA-418886	Netrin mediated repulsion signals	0	12	1	39	0.000991736	0.0897656	0.302734	1	4	0.000412669	48887	Homo sapiens			IGF1R	Q06124	R-HSA-418863
R-HSA-70268	Pyruvate metabolism	1	46	0	3	0.00380165	0.0897656	0.302734	1	11	0.00113484	48887	Homo sapiens	PDK1				R-HSA-203946
R-HSA-1592389	Activation of Matrix Metalloproteinases	1	35	0	18	0.00289256	0.0932591	0.302734	3	27	0.00278552	48887	Homo sapiens	ELANE				R-HSA-1604712;R-HSA-1592316;R-HSA-1592398
R-HSA-73779	RNA Polymerase II Transcription Pre-Initiation And Promoter Opening	1	46	0	7	0.00380165	0.0967396	0.302734	5	5	0.000515836	48887	Homo sapiens	MIA				R-HSA-109637;R-HSA-109636;R-HSA-75095;R-HSA-109639;R-HSA-109638
R-HSA-1170546	Prolactin receptor signaling	0	18	1	36	0.0014876	0.098475	0.302734	1	14	0.00144434	48887	Homo sapiens			IGF1R	Q06124	R-HSA-1369114
R-HSA-167161	HIV Transcription Initiation	1	48	0	7	0.00396694	0.100207	0.302734	4	4	0.000412669	48887	Homo sapiens	MIA				R-HSA-167477;R-HSA-167130;R-HSA-167134;R-HSA-167118
R-HSA-73776	RNA Polymerase II Promoter Escape	1	48	0	7	0.00396694	0.100207	0.302734	3	5	0.000515836	48887	Homo sapiens	MIA				R-HSA-75873;R-HSA-75850;R-HSA-75869
R-HSA-167162	RNA Polymerase II HIV Promoter Escape	1	48	0	7	0.00396694	0.100207	0.302734	4	7	0.000722171	48887	Homo sapiens	MIA				R-HSA-167474;R-HSA-167136;R-HSA-167121;R-HSA-167113
R-HSA-1474244	Extracellular matrix organization	3	320	0	298	0.0264463	0.102195	0.302734	15	275	0.028371	48887	Homo sapiens	P4HB;HAPLN1;ELANE				R-HSA-2514823;R-HSA-2482180;R-HSA-1650808;R-HSA-2002460;R-HSA-1592316;R-HSA-1566962;R-HSA-1981104;R-HSA-1604712;R-HSA-1592270;R-HSA-1592398;R-HSA-1981128;R-HSA-1980233;R-HSA-1981157;R-HSA-2318623;R-HSA-1981120
R-HSA-1980143	Signaling by NOTCH1	2	82	0	221	0.00677686	0.104941	0.302734	34	37	0.00381719	48887	Homo sapiens	NOTCH1;CNTN1				R-HSA-157632;R-HSA-1980122;R-HSA-1980123;R-HSA-1980118;R-HSA-1980112;R-HSA-373706;R-HSA-4396371;R-HSA-1912396;R-HSA-1980047;R-HSA-1980044;R-HSA-1980109;R-HSA-1912398;R-HSA-1852623;R-HSA-1980042;R-HSA-1912393;R-HSA-1980041;R-HSA-1912394;R-HSA-4396379;R-HSA-1980039;R-HSA-1912388;R-HSA-1912391;R-HSA-1912385;R-HSA-4396382;R-HSA-1912386;R-HSA-157926;R-HSA-157353;R-HSA-1980078;R-HSA-1980138;R-HSA-19800…
R-HSA-76042	RNA Polymerase II Transcription Initiation And Promoter Clearance	1	51	0	7	0.00421488	0.105385	0.302734	7	9	0.000928505	48887	Homo sapiens	MIA				R-HSA-75873;R-HSA-75861;R-HSA-75864;R-HSA-75866;R-HSA-75850;R-HSA-75869;R-HSA-75949
R-HSA-389513	CTLA4 inhibitory signaling	1	26	1	32	0.00214876	0.105385	0.302734	2	5	0.000515836	48887	Homo sapiens	PDK1	O15530	IGF1R	Q06124	R-HSA-388829;R-HSA-390329
R-HSA-202427	Phosphorylation of CD3 and TCR zeta chains	0	45	1	24	0.00371901	0.117353	0.302734	2	7	0.000722171	48887	Homo sapiens			IGF1R	P41240	R-HSA-8855375;R-HSA-203774
R-HSA-174800	Chylomicron-mediated lipid transport	1	36	0	37	0.00297521	0.124123	0.302734	1	20	0.00206334	48887	Homo sapiens	P4HB				R-HSA-174786
R-HSA-3134973	LRR FLII-interacting protein 1 (LRRFIP1) activates type I IFN production	0	8	1	63	0.000661157	0.125808	0.302734	4	5	0.000515836	48887	Homo sapiens			IGF1R	P35222	R-HSA-3134904;R-HSA-3134901;R-HSA-3134883;R-HSA-3134914
R-HSA-936964	Activation of IRF3/IRF7 mediated by TBK1/IKK epsilon	0	22	1	53	0.00181818	0.127489	0.302734	1	9	0.000928505	48887	Homo sapiens			IGF1R	Q06124	R-HSA-166271
R-HSA-5362517	Signaling by Retinoic Acid	1	70	0	2	0.00578512	0.129168	0.302734	1	21	0.00216651	48887	Homo sapiens	PDK1				R-HSA-203946
R-HSA-186712	Regulation of beta-cell development	1	36	0	40	0.00297521	0.129168	0.302734	1	26	0.00268235	48887	Homo sapiens	NOTCH1				R-HSA-210834
R-HSA-1442490	Collagen degradation	1	69	0	6	0.00570248	0.132515	0.302734	1	34	0.00350769	48887	Homo sapiens	ELANE				R-HSA-2482180
R-HSA-3906995	Diseases associated with O-glycosylation of proteins	1	76	0	2	0.00628099	0.137513	0.302734	1	9	0.000928505	48887	Homo sapiens	NOTCH1				R-HSA-5096538
R-HSA-392451	G beta:gamma signalling through PI3Kgamma	1	52	0	27	0.00429752	0.139173	0.302734	1	4	0.000412669	48887	Homo sapiens	PDK1				R-HSA-198284
R-HSA-5358346	Hedgehog ligand biogenesis	1	72	0	8	0.00595041	0.142483	0.302734	2	15	0.00154751	48887	Homo sapiens	P4HB				R-HSA-5358336;R-HSA-5358340
R-HSA-1650814	Collagen biosynthesis and modifying enzymes	1	76	0	6	0.00628099	0.145781	0.302734	7	15	0.00154751	48887	Homo sapiens	P4HB				R-HSA-1650808;R-HSA-2002460;R-HSA-1981128;R-HSA-1980233;R-HSA-1981157;R-HSA-1981104;R-HSA-1981120
R-HSA-397795	G-protein beta:gamma signalling	1	57	0	27	0.00471074	0.147425	0.302734	1	6	0.000619003	48887	Homo sapiens	PDK1				R-HSA-198284
R-HSA-418885	DCC mediated attractive signaling	0	19	1	70	0.00157025	0.149066	0.302734	1	12	0.00123801	48887	Homo sapiens			EPHA2	Q05397	R-HSA-373720
R-HSA-3000178	ECM proteoglycans	1	78	0	11	0.00644628	0.155601	0.302734	1	22	0.00226968	48887	Homo sapiens	HAPLN1				R-HSA-2318623
R-HSA-416482	G alpha (12/13) signalling events	0	82	1	10	0.00677686	0.15885	0.302734	1	12	0.00123801	48887	Homo sapiens			IGF1R	Q9NZN5	R-HSA-398184
R-HSA-2682334	EPH-Ephrin signaling	2	105	1	287	0.00867769	0.159686	0.302734	15	57	0.00588053	48887	Homo sapiens	EPHA10;EPHA2	Q5JZY3;P29317	EPHA2	Q05397	R-HSA-3928602;R-HSA-3928607;R-HSA-3928604;R-HSA-3928597;R-HSA-3928660;R-HSA-3928628;R-HSA-3928651;R-HSA-4093327;R-HSA-3928584;R-HSA-3928648;R-HSA-3928591;R-HSA-3928588;R-HSA-3928578;R-HSA-3928642;R-HSA-3928646
R-HSA-71406	Pyruvate metabolism and Citric Acid (TCA) cycle	1	87	0	4	0.00719008	0.16047	0.302734	1	29	0.00299185	48887	Homo sapiens	PDK1				R-HSA-203946
R-HSA-1839117	Signaling by cytosolic FGFR1 fusion mutants	0	26	1	70	0.00214876	0.163701	0.302734	2	14	0.00144434	48887	Homo sapiens			IGF1R	P27986	R-HSA-1839114;R-HSA-1839078
R-HSA-210990	PECAM1 interactions	0	14	1	85	0.00115702	0.166921	0.302734	1	7	0.000722171	48887	Homo sapiens			IGF1R	Q06124	R-HSA-210294
R-HSA-432142	Platelet sensitization by LDL	0	23	1	76	0.00190083	0.168526	0.302734	1	8	0.000825338	48887	Homo sapiens			IGF1R	Q06124	R-HSA-210294
R-HSA-912694	Regulation of IFNA signaling	0	28	1	69	0.00231405	0.170128	0.302734	2	5	0.000515836	48887	Homo sapiens			IGF1R	P18031;Q06124	R-HSA-997311;R-HSA-997309
R-HSA-6804759	Regulation of TP53 Activity through Association with Co-factors	0	17	1	84	0.00140496	0.173323	0.302734	1	11	0.00113484	48887	Homo sapiens			EPHA10	Q8N9N5	R-HSA-3221982
R-HSA-1059683	Interleukin-6 signaling	0	16	1	86	0.00132231	0.173323	0.302734	1	19	0.00196018	48887	Homo sapiens			IGF1R	Q06124	R-HSA-1112708
R-HSA-982772	Growth hormone receptor signaling	0	29	1	77	0.00239669	0.174916	0.302734	1	28	0.00288868	48887	Homo sapiens			IGF1R	P18031	R-HSA-1168445
R-HSA-389356	CD28 co-stimulation	1	39	0	66	0.00322314	0.176506	0.302734	3	19	0.00196018	48887	Homo sapiens	PDK1				R-HSA-2317314;R-HSA-198270;R-HSA-2316429
R-HSA-4791275	Signaling by WNT in cancer	1	40	0	72	0.00330579	0.181259	0.302734	1	16	0.00165068	48887	Homo sapiens	DKK1				R-HSA-5339711
R-HSA-3299685	Detoxification of Reactive Oxygen Species	1	62	0	46	0.00512397	0.184413	0.302734	1	32	0.00330135	48887	Homo sapiens	P4HB				R-HSA-3341296
R-HSA-1474290	Collagen formation	1	102	0	7	0.00842975	0.189122	0.302734	7	40	0.00412669	48887	Homo sapiens	P4HB				R-HSA-1650808;R-HSA-2002460;R-HSA-1981128;R-HSA-1980233;R-HSA-1981157;R-HSA-1981104;R-HSA-1981120
R-HSA-1980145	Signaling by NOTCH2	1	37	0	76	0.00305785	0.189122	0.302734	2	20	0.00206334	48887	Homo sapiens	CNTN1				R-HSA-2220816;R-HSA-2974731
R-HSA-210993	Tie2 Signaling	0	22	1	97	0.00181818	0.193804	0.302734	2	14	0.00144434	48887	Homo sapiens			IGF1R	Q14449;Q06124	R-HSA-204873;R-HSA-204813
R-HSA-3928662	EPHB-mediated forward signaling	0	52	1	70	0.00429752	0.195359	0.302734	1	26	0.00268235	48887	Homo sapiens			EPHA2	Q05397	R-HSA-3928588
R-HSA-1839124	FGFR1 mutant receptor activation	0	48	1	70	0.00396694	0.196911	0.302734	2	25	0.00257918	48887	Homo sapiens			IGF1R	P27986	R-HSA-1839114;R-HSA-1839078
R-HSA-167172	Transcription of the HIV genome	1	78	0	45	0.00644628	0.20155	0.302734	10	45	0.00464253	48887	Homo sapiens	MIA				R-HSA-167474;R-HSA-167136;R-HSA-167121;R-HSA-167477;R-HSA-167130;R-HSA-167097;R-HSA-167113;R-HSA-167134;R-HSA-167118;R-HSA-167484
R-HSA-198323	AKT phosphorylates targets in the cytosol	0	15	1	106	0.00123967	0.203091	0.302734	1	8	0.000825338	48887	Homo sapiens			IGF1R	Q00987	R-HSA-198599
R-HSA-6783589	Interleukin-6 family signaling	0	32	1	92	0.00264463	0.204629	0.302734	1	36	0.00371402	48887	Homo sapiens			IGF1R	Q06124	R-HSA-1112708
R-HSA-844456	The NLRP3 inflammasome	0	19	2	109	0.00157025	0.212274	0.302734	1	17	0.00175384	48887	Homo sapiens			MATK;EPHA2	P08238	R-HSA-874087
R-HSA-442742	CREB phosphorylation through the activation of Ras	1	34	0	97	0.00280992	0.213795	0.302734	1	7	0.000722171	48887	Homo sapiens	PDK1				R-HSA-442739
R-HSA-5336415	Uptake and function of diphtheria toxin	0	10	2	118	0.000826446	0.215313	0.302734	1	5	0.000515836	48887	Homo sapiens			MATK;EPHA2	P08238	R-HSA-5336420
R-HSA-430116	GP1b-IX-V activation signalling	0	10	1	119	0.000826446	0.216828	0.302734	1	7	0.000722171	48887	Homo sapiens			IGF1R	P27986	R-HSA-443402
R-HSA-114604	GPVI-mediated activation cascade	1	64	0	71	0.00528926	0.21834	0.302734	3	25	0.00257918	48887	Homo sapiens	PDK1				R-HSA-437195;R-HSA-437192;R-HSA-198284
R-HSA-622312	Inflammasomes	0	29	2	111	0.00239669	0.222859	0.302734	1	27	0.00278552	48887	Homo sapiens			MATK;EPHA2	P08238	R-HSA-874087
R-HSA-5218920	VEGFR2 mediated vascular permeability	1	44	0	95	0.00363636	0.225858	0.302734	3	15	0.00154751	48887	Homo sapiens	PDK1				R-HSA-2317314;R-HSA-198270;R-HSA-2316429
R-HSA-438064	Post NMDA receptor activation events	1	44	0	97	0.00363636	0.228846	0.302734	1	18	0.00185701	48887	Homo sapiens	PDK1				R-HSA-442739
R-HSA-8855121	VLDL interactions	1	28	0	108	0.00231405	0.230336	0.302734	1	15	0.00154751	48887	Homo sapiens	P4HB				R-HSA-8866329
R-HSA-450513	Tristetraprolin (TTP, ZFP36) binds and destabilizes mRNA	0	19	1	121	0.00157025	0.231822	0.302734	1	4	0.000412669	48887	Homo sapiens			IGF1R	P31946	R-HSA-450394
R-HSA-4641262	Disassembly of the destruction complex and recruitment of AXIN to the membrane	0	33	1	113	0.00272727	0.231822	0.302734	1	7	0.000722171	48887	Homo sapiens			IGF1R	P35222	R-HSA-201685
R-HSA-6807505	RNA polymerase II transcribes snRNA genes	1	90	0	53	0.00743802	0.234788	0.302734	9	11	0.00113484	48887	Homo sapiens	MIA				R-HSA-6814549;R-HSA-6814885;R-HSA-6814559;R-HSA-6810238;R-HSA-6810235;R-HSA-6814555;R-HSA-6810234;R-HSA-6814554;R-HSA-6810233
R-HSA-446652	Interleukin-1 signaling	1	48	0	112	0.00396694	0.236267	0.302734	14	33	0.00340452	48887	Homo sapiens	IL1B				R-HSA-507719;R-HSA-446694;R-HSA-446692;R-HSA-446862;R-HSA-446894;R-HSA-446701;R-HSA-446634;R-HSA-446868;R-HSA-450133;R-HSA-446130;R-HSA-446684;R-HSA-445752;R-HSA-446648;R-HSA-445753
R-HSA-162582	Signal Transduction	12	2837	3	2819	0.234463	0.23746	0.302734	118	1781	0.183741	48887	Homo sapiens	NOTCH1;WIF1;CNTN1;MATK;P4HB;DKK1;THBS4;IGF1R;PDK1	Q15118;Q12860;P42679;O15530;Q9Y5W5;P46531;ENST00000277541;ENSG00000148400;P08069;P35443;O94907;P07237	MATK;IGF1R;EPHA2	Q5S007;Q14289;P31946;Q13322;P41240;P27986;Q00987;Q9NZN5;O43559;P18031;Q06124;Q05397;P35222	R-HSA-1912349;R-HSA-3769401;R-HSA-177923;R-HSA-1606682;R-HSA-5623632;R-HSA-5654608;R-HSA-5654623;R-HSA-177931;R-HSA-1369114;R-HSA-4396371;R-HSA-354066;R-HSA-4396379;R-HSA-177944;R-HSA-5654603;R-HSA-4396382;R-HSA-3769383;R-HSA-2317314;R-HSA-1250353;R-HSA-1912382;R-HSA-3769370;R-HSA-2219524;R-HSA-2974731;R-HSA-5623667;R-HSA-1912379;R-HSA-2428930;R-HSA-1912378;R-HSA-377644;R-HSA-1912372;R-HSA-191237…
R-HSA-442755	Activation of NMDA receptor upon glutamate binding and postsynaptic events	1	50	0	97	0.00413223	0.237743	0.302734	1	22	0.00226968	48887	Homo sapiens	PDK1				R-HSA-442739
R-HSA-5655302	Signaling by FGFR1 in disease	0	57	1	92	0.00471074	0.240686	0.302734	2	35	0.00361085	48887	Homo sapiens			IGF1R	P27986	R-HSA-1839114;R-HSA-1839078
R-HSA-674695	RNA Polymerase II Pre-transcription Events	1	77	0	84	0.00636364	0.242154	0.302734	3	17	0.00175384	48887	Homo sapiens	MIA				R-HSA-75856;R-HSA-75862;R-HSA-73946
R-HSA-5625740	RHO GTPases activate PKNs	1	79	0	66	0.00652893	0.242154	0.302734	2	20	0.00206334	48887	Homo sapiens	PDK1				R-HSA-5623632;R-HSA-5623667
R-HSA-69541	Stabilization of p53	0	57	1	95	0.00471074	0.245081	0.302734	2	15	0.00154751	48887	Homo sapiens			IGF1R	Q00987	R-HSA-6804741;R-HSA-6804955
R-HSA-8857538	PTK6 promotes HIF1A stabilization	0	9	1	147	0.000743802	0.255239	0.302734	1	5	0.000515836	48887	Homo sapiens			MATK	Q5S007	R-HSA-8857565
R-HSA-5663202	Diseases of signal transduction	3	384	1	626	0.0317355	0.262114	0.302734	45	263	0.027133	48887	Homo sapiens	NOTCH1;DKK1;PDK1	O15530;P46531;O94907	IGF1R	P27986;Q00987	R-HSA-2769000;R-HSA-2243937;R-HSA-2243942;R-HSA-2769007;R-HSA-2220964;R-HSA-2220967;R-HSA-2220966;R-HSA-2399981;R-HSA-2220971;R-HSA-2768993;R-HSA-2768999;R-HSA-2666278;R-HSA-2220976;R-HSA-2220979;R-HSA-2220978;R-HSA-2220981;R-HSA-1839114;R-HSA-2220982;R-HSA-2220985;R-HSA-2769008;R-HSA-2769015;R-HSA-2220988;R-HSA-2900748;R-HSA-2691211;R-HSA-2691214;R-HSA-2900747;R-HSA-2660815;R-HSA-2737728;R-HSA-2…
R-HSA-1295596	Spry regulation of FGF signaling	0	17	1	145	0.00140496	0.263842	0.302734	1	11	0.00113484	48887	Homo sapiens			IGF1R	Q06124	R-HSA-1549564
R-HSA-2262752	Cellular responses to stress	3	470	0	554	0.038843	0.267907	0.302734	2	205	0.0211493	48887	Homo sapiens	CA9;P4HB				R-HSA-3341296;R-HSA-1235035
R-HSA-447043	Neurofascin interactions	1	9	0	153	0.000743802	0.268107	0.302734	1	7	0.000722171	48887	Homo sapiens	CNTN1				R-HSA-373733
R-HSA-1251985	Nuclear signaling by ERBB4	0	44	1	120	0.00363636	0.268107	0.302734	1	29	0.00299185	48887	Homo sapiens			IGF1R	Q06124	R-HSA-1369114
R-HSA-2428928	IRS-related events triggered by IGF1R	2	320	1	257	0.0264463	0.26935	0.302734	6	77	0.00794388	48887	Homo sapiens	IGF1R;PDK1	O15530;P08069	IGF1R	P31946	R-HSA-109701;R-HSA-2428930;R-HSA-109702;R-HSA-2428926;R-HSA-5672824;R-HSA-2428922
R-HSA-2404192	Signaling by Type 1 Insulin-like Growth Factor 1 Receptor (IGF1R)	2	321	1	257	0.0265289	0.270068	0.302734	11	84	0.00866605	48887	Homo sapiens	IGF1R;PDK1	O15530;P08069	IGF1R	P31946	R-HSA-2404199;R-HSA-109701;R-HSA-2404193;R-HSA-2404195;R-HSA-2428930;R-HSA-109702;R-HSA-2428926;R-HSA-2404200;R-HSA-5686072;R-HSA-5672824;R-HSA-2428922
R-HSA-2428924	IGF1R signaling cascade	2	321	1	257	0.0265289	0.270068	0.302734	9	82	0.00845971	48887	Homo sapiens	IGF1R;PDK1	O15530;P08069	IGF1R	P31946	R-HSA-109701;R-HSA-2404193;R-HSA-2404195;R-HSA-2428930;R-HSA-109702;R-HSA-2428926;R-HSA-5686072;R-HSA-5672824;R-HSA-2428922
R-HSA-450385	Butyrate Response Factor 1 (BRF1) binds and destabilizes mRNA	0	19	1	151	0.00157025	0.275163	0.302734	2	6	0.000619003	48887	Homo sapiens			IGF1R	P31946	R-HSA-450406;R-HSA-482788
R-HSA-2980736	Peptide hormone metabolism	0	122	1	50	0.0100826	0.276566	0.302734	1	53	0.00546786	48887	Homo sapiens			IGF1R	P05019	R-HSA-422048
R-HSA-1474228	Degradation of the extracellular matrix	1	145	0	30	0.0119835	0.28076	0.302734	7	100	0.0103167	48887	Homo sapiens	ELANE				R-HSA-1604712;R-HSA-2514823;R-HSA-2482180;R-HSA-1592316;R-HSA-1566962;R-HSA-1592270;R-HSA-1592398
R-HSA-6804756	Regulation of TP53 Activity through Phosphorylation	1	94	0	83	0.0077686	0.28076	0.302734	1	26	0.00268235	48887	Homo sapiens	MIA				R-HSA-6805399
R-HSA-5654732	Negative regulation of FGFR3 signaling	0	34	1	145	0.00280992	0.286315	0.302734	1	14	0.00144434	48887	Homo sapiens			IGF1R	Q06124	R-HSA-1549564
R-HSA-5654733	Negative regulation of FGFR4 signaling	0	35	1	145	0.00289256	0.287698	0.302734	1	14	0.00144434	48887	Homo sapiens			IGF1R	Q06124	R-HSA-1549564
R-HSA-452723	Transcriptional regulation of pluripotent stem cells	1	56	0	124	0.0046281	0.289077	0.302734	1	35	0.00361085	48887	Homo sapiens	DKK1				R-HSA-2972977
R-HSA-1226099	Signaling by FGFR in disease	0	92	1	98	0.00760331	0.293201	0.302734	2	106	0.0109357	48887	Homo sapiens			IGF1R	P27986	R-HSA-1839114;R-HSA-1839078
R-HSA-354192	Integrin alphaIIb beta3 signaling	1	37	2	152	0.00305785	0.294571	0.302734	4	24	0.00247601	48887	Homo sapiens	PDK1	O15530	IGF1R;EPHA2	P18031;P41240;Q05397	R-HSA-354066;R-HSA-432110;R-HSA-377644;R-HSA-377643
R-HSA-5654727	Negative regulation of FGFR2 signaling	0	41	1	145	0.00338843	0.295938	0.302734	1	14	0.00144434	48887	Homo sapiens			IGF1R	Q06124	R-HSA-1549564
R-HSA-5654726	Negative regulation of FGFR1 signaling	0	39	1	147	0.00322314	0.295938	0.302734	1	15	0.00154751	48887	Homo sapiens			IGF1R	Q06124	R-HSA-1549564
R-HSA-5674400	Constitutive Signaling by AKT1 E17K in Cancer	1	32	1	159	0.00264463	0.297302	0.302734	3	18	0.00185701	48887	Homo sapiens	PDK1	O15530	IGF1R	Q00987	R-HSA-2243937;R-HSA-2243942;R-HSA-2399981
R-HSA-69580	p53-Dependent G1/S DNA damage checkpoint	0	68	1	126	0.00561983	0.297302	0.302734	2	22	0.00226968	48887	Homo sapiens			IGF1R	Q00987	R-HSA-6804741;R-HSA-6804955
R-HSA-69563	p53-Dependent G1 DNA Damage Response	0	68	1	126	0.00561983	0.297302	0.302734	2	22	0.00226968	48887	Homo sapiens			IGF1R	Q00987	R-HSA-6804741;R-HSA-6804955
R-HSA-202424	Downstream TCR signaling	1	124	0	85	0.0102479	0.302734	0.302734	14	24	0.00247601	48887	Homo sapiens	PDK1				R-HSA-202466;R-HSA-202534;R-HSA-202437;R-HSA-202500;R-HSA-202443;R-HSA-202472;R-HSA-202222;R-HSA-202478;R-HSA-202510;R-HSA-202453;R-HSA-202164;R-HSA-202459;R-HSA-202394;R-HSA-202489
R-HSA-388841	Costimulation by the CD28 family	1	96	1	97	0.00793388	0.302734	0.302734	5	34	0.00350769	48887	Homo sapiens	PDK1	O15530	IGF1R	Q06124	R-HSA-2317314;R-HSA-388829;R-HSA-390329;R-HSA-198270;R-HSA-2316429
R-HSA-166663	Initial triggering of complement	1	188	0	3	0.0155372	0.308126	0.308126	7	20	0.00206334	48887	Homo sapiens	CFB				R-HSA-183122;R-HSA-173745;R-HSA-183126;R-HSA-174551;R-HSA-173754;R-HSA-183130;R-HSA-173740
R-HSA-3781865	Diseases of glycosylation	1	190	0	5	0.0157025	0.309467	0.309467	1	58	0.0059837	48887	Homo sapiens	NOTCH1				R-HSA-5096538
R-HSA-76009	Platelet Aggregation (Plug Formation)	1	49	2	152	0.00404959	0.310806	0.310806	4	27	0.00278552	48887	Homo sapiens	PDK1	O15530	IGF1R;EPHA2	P18031;P41240;Q05397	R-HSA-354066;R-HSA-432110;R-HSA-377644;R-HSA-377643
R-HSA-69615	G1/S DNA Damage Checkpoints	0	70	1	138	0.00578512	0.313477	0.313477	2	28	0.00288868	48887	Homo sapiens			IGF1R	Q00987	R-HSA-6804741;R-HSA-6804955
R-HSA-1227986	Signaling by ERBB2	1	55	0	151	0.00454545	0.313477	0.313477	1	38	0.00392035	48887	Homo sapiens	MATK				R-HSA-1963563
R-HSA-5633007	Regulation of TP53 Activity	2	169	2	485	0.0139669	0.333052	0.333052	12	90	0.00928505	48887	Homo sapiens	MIA;PDK1	O15530;P49848	EPHA10;IGF1R	Q8N9N5;Q00987	R-HSA-6805399;R-HSA-6804741;R-HSA-6795460;R-HSA-198599;R-HSA-6795667;R-HSA-6793666;R-HSA-6795473;R-HSA-6792863;R-HSA-3700992;R-HSA-6793661;R-HSA-6804955;R-HSA-3221982
R-HSA-73857	RNA Polymerase II Transcription	1	144	0	84	0.0119008	0.334485	0.334485	15	48	0.00495203	48887	Homo sapiens	MIA				R-HSA-75873;R-HSA-109637;R-HSA-109636;R-HSA-109639;R-HSA-109638;R-HSA-75850;R-HSA-75949;R-HSA-75856;R-HSA-75861;R-HSA-75095;R-HSA-75862;R-HSA-75864;R-HSA-75866;R-HSA-73946;R-HSA-75869
R-HSA-6804757	Regulation of TP53 Degradation	1	42	1	185	0.00347107	0.342201	0.342201	10	30	0.00309502	48887	Homo sapiens	PDK1	O15530	IGF1R	Q00987	R-HSA-6804741;R-HSA-6795460;R-HSA-198599;R-HSA-6795667;R-HSA-6793666;R-HSA-6795473;R-HSA-6792863;R-HSA-3700992;R-HSA-6793661;R-HSA-6804955
R-HSA-418346	Platelet homeostasis	0	112	1	110	0.0092562	0.344754	0.344754	1	28	0.00288868	48887	Homo sapiens			IGF1R	Q06124	R-HSA-210294
R-HSA-5339562	Uptake and actions of bacterial toxins	0	56	2	168	0.0046281	0.344754	0.344754	1	64	0.0066027	48887	Homo sapiens			MATK;EPHA2	P08238	R-HSA-5336420
R-HSA-168249	Innate Immune System	5	1079	3	1181	0.0891736	0.350174	0.350174	33	636	0.0656144	48887	Homo sapiens	IL1B;CFB;PDK1	ENSG00000125538;O15530;ENST00000263341;P00751;P01584	MATK;IGF1R;EPHA2	P29353-2;P08238;Q06124;P35222;Q00987	R-HSA-198599;R-HSA-977605;R-HSA-3134883;R-HSA-183122;R-HSA-981535;R-HSA-977375;R-HSA-977629;R-HSA-183126;R-HSA-174551;R-HSA-3134904;R-HSA-183130;R-HSA-5660622;R-HSA-3134901;R-HSA-977363;R-HSA-977619;R-HSA-2317314;R-HSA-5660663;R-HSA-166817;R-HSA-2219524;R-HSA-202534;R-HSA-874087;R-HSA-3134914;R-HSA-2316429;R-HSA-173740;R-HSA-2730886;R-HSA-173680;R-HSA-173745;R-HSA-2730844;R-HSA-202164;R-HSA-17375…
R-HSA-166658	Complement cascade	1	211	0	13	0.017438	0.351095	0.351095	16	60	0.00619003	48887	Homo sapiens	CFB				R-HSA-166817;R-HSA-977605;R-HSA-173740;R-HSA-183122;R-HSA-981535;R-HSA-977375;R-HSA-173680;R-HSA-977629;R-HSA-173745;R-HSA-183126;R-HSA-174551;R-HSA-173754;R-HSA-183130;R-HSA-981621;R-HSA-977363;R-HSA-977619
R-HSA-1266738	Developmental Biology	5	931	3	1280	0.0769421	0.351778	0.351778	24	438	0.0451872	48887	Homo sapiens	NOTCH1;EPHA10;CNTN1;DKK1;EPHA2	ENSG00000107984;Q12860;Q5JZY3;P46531;P29317	CNTN1;IGF1R;EPHA2	Q06124;Q05397;P18433	R-HSA-373733;R-HSA-3928602;R-HSA-3928607;R-HSA-3928604;R-HSA-418863;R-HSA-3928597;R-HSA-443784;R-HSA-3928660;R-HSA-3928628;R-HSA-3928651;R-HSA-4093327;R-HSA-210834;R-HSA-3928584;R-HSA-3928648;R-HSA-8855508;R-HSA-3928591;R-HSA-3928588;R-HSA-3928578;R-HSA-3928642;R-HSA-391868;R-HSA-391865;R-HSA-2972977;R-HSA-3928646;R-HSA-373720
R-HSA-1428517	The citric acid (TCA) cycle and respiratory electron transport	1	215	0	21	0.0177686	0.353615	0.353615	1	58	0.0059837	48887	Homo sapiens	PDK1				R-HSA-203946
R-HSA-174824	Lipoprotein metabolism	1	85	0	149	0.00702479	0.356125	0.356125	2	73	0.00753121	48887	Homo sapiens	P4HB				R-HSA-174786;R-HSA-8866329
R-HSA-2644603	Signaling by NOTCH1 in Cancer	1	67	0	173	0.00553719	0.358626	0.358626	39	39	0.00402352	48887	Homo sapiens	NOTCH1				R-HSA-2769000;R-HSA-2769007;R-HSA-2220964;R-HSA-2220967;R-HSA-2220966;R-HSA-2220971;R-HSA-2768993;R-HSA-2768999;R-HSA-2666278;R-HSA-2220976;R-HSA-2220979;R-HSA-2220978;R-HSA-2220981;R-HSA-2220982;R-HSA-2220985;R-HSA-2769008;R-HSA-2769015;R-HSA-2220988;R-HSA-2900748;R-HSA-2691211;R-HSA-2691214;R-HSA-2900747;R-HSA-2660815;R-HSA-2737728;R-HSA-2730752;R-HSA-4396393;R-HSA-2900743;R-HSA-4396392;R-HSA-2…
R-HSA-2894858	Signaling by NOTCH1 HD+PEST Domain Mutants in Cancer	1	67	0	173	0.00553719	0.358626	0.358626	21	21	0.00216651	48887	Homo sapiens	NOTCH1				R-HSA-2900748;R-HSA-2220964;R-HSA-2220967;R-HSA-2900747;R-HSA-2220966;R-HSA-2220971;R-HSA-4396393;R-HSA-2900743;R-HSA-4396392;R-HSA-2900765;R-HSA-2220976;R-HSA-4396402;R-HSA-4396401;R-HSA-2220979;R-HSA-2220981;R-HSA-2220982;R-HSA-2900756;R-HSA-2220985;R-HSA-2220957;R-HSA-2769015;R-HSA-2220988
R-HSA-2644606	Constitutive Signaling by NOTCH1 PEST Domain Mutants	1	67	0	173	0.00553719	0.358626	0.358626	21	21	0.00216651	48887	Homo sapiens	NOTCH1				R-HSA-2769000;R-HSA-2769007;R-HSA-2220964;R-HSA-2220967;R-HSA-2220966;R-HSA-2220971;R-HSA-4396393;R-HSA-2768993;R-HSA-4396392;R-HSA-2768999;R-HSA-2220944;R-HSA-4396402;R-HSA-4396401;R-HSA-2220979;R-HSA-2220981;R-HSA-2220982;R-HSA-2220985;R-HSA-2769008;R-HSA-2220957;R-HSA-2769015;R-HSA-2220988
R-HSA-2894862	Constitutive Signaling by NOTCH1 HD+PEST Domain Mutants	1	67	0	173	0.00553719	0.358626	0.358626	21	21	0.00216651	48887	Homo sapiens	NOTCH1				R-HSA-2900748;R-HSA-2220964;R-HSA-2220967;R-HSA-2900747;R-HSA-2220966;R-HSA-2220971;R-HSA-4396393;R-HSA-2900743;R-HSA-4396392;R-HSA-2900765;R-HSA-2220976;R-HSA-4396402;R-HSA-4396401;R-HSA-2220979;R-HSA-2220981;R-HSA-2220982;R-HSA-2900756;R-HSA-2220985;R-HSA-2220957;R-HSA-2769015;R-HSA-2220988
R-HSA-2644602	Signaling by NOTCH1 PEST Domain Mutants in Cancer	1	67	0	173	0.00553719	0.358626	0.358626	21	21	0.00216651	48887	Homo sapiens	NOTCH1				R-HSA-2769000;R-HSA-2769007;R-HSA-2220964;R-HSA-2220967;R-HSA-2220966;R-HSA-2220971;R-HSA-4396393;R-HSA-2768993;R-HSA-4396392;R-HSA-2768999;R-HSA-2220944;R-HSA-4396402;R-HSA-4396401;R-HSA-2220979;R-HSA-2220981;R-HSA-2220982;R-HSA-2220985;R-HSA-2769008;R-HSA-2220957;R-HSA-2769015;R-HSA-2220988
R-HSA-165159	mTOR signalling	0	47	1	215	0.0038843	0.368536	0.368536	1	26	0.00268235	48887	Homo sapiens			IGF1R	P31946	R-HSA-5672824
R-HSA-2122947	NOTCH1 Intracellular Domain Regulates Transcription	1	56	0	198	0.0046281	0.374654	0.374654	15	16	0.00165068	48887	Homo sapiens	NOTCH1				R-HSA-4396371;R-HSA-1980078;R-HSA-1912396;R-HSA-1980047;R-HSA-1852623;R-HSA-1912393;R-HSA-1912394;R-HSA-4396347;R-HSA-4396379;R-HSA-1912388;R-HSA-1912391;R-HSA-1912385;R-HSA-4396382;R-HSA-1980067;R-HSA-1980065
R-HSA-909733	Interferon alpha/beta signaling	0	140	1	111	0.0115702	0.374654	0.374654	2	19	0.00196018	48887	Homo sapiens			IGF1R	P18031;Q06124	R-HSA-997311;R-HSA-997309
R-HSA-109703	PKB-mediated events	0	49	1	218	0.00404959	0.374654	0.374654	1	28	0.00288868	48887	Homo sapiens			IGF1R	P31946	R-HSA-5672824
R-HSA-186797	Signaling by PDGF	2	412	1	326	0.0340496	0.382288	0.382288	7	114	0.0117611	48887	Homo sapiens	THBS4;PDK1	O15530;P35443	IGF1R	Q06124;Q00987	R-HSA-2317314;R-HSA-382054;R-HSA-198599;R-HSA-2219524;R-HSA-186778;R-HSA-198270;R-HSA-2316429
R-HSA-8866910	TFAP2 (AP-2) family regulates transcription of growth factors and their receptors	0	18	1	237	0.0014876	0.385523	0.385523	1	15	0.00154751	48887	Homo sapiens			MATK	P04626	R-HSA-8864466
R-HSA-111465	Apoptotic cleavage of cellular proteins	0	38	1	222	0.0031405	0.38672	0.38672	1	36	0.00371402	48887	Homo sapiens			EPHA2	Q05397	R-HSA-201634
R-HSA-2219528	PI3K/AKT Signaling in Cancer	1	116	1	159	0.00958678	0.403234	0.403234	3	21	0.00216651	48887	Homo sapiens	PDK1	O15530	IGF1R	Q00987	R-HSA-2243937;R-HSA-2243942;R-HSA-2399981
R-HSA-112314	Neurotransmitter Receptor Binding And Downstream Transmission In The Postsynaptic Cell	1	160	0	121	0.0132231	0.406717	0.406717	1	53	0.00546786	48887	Homo sapiens	PDK1				R-HSA-442739
R-HSA-1834949	Cytosolic sensors of pathogen-associated DNA	0	86	1	207	0.00710744	0.413623	0.413623	4	45	0.00464253	48887	Homo sapiens			IGF1R	P35222	R-HSA-3134904;R-HSA-3134901;R-HSA-3134883;R-HSA-3134914
R-HSA-168643	Nucleotide-binding domain, leucine rich repeat containing receptor (NLR) signaling pathways	0	65	2	233	0.0053719	0.414767	0.414767	1	44	0.00453936	48887	Homo sapiens			MATK;EPHA2	P08238	R-HSA-874087
R-HSA-373752	Netrin-1 signaling	0	50	2	239	0.00413223	0.415908	0.415908	2	31	0.00319818	48887	Homo sapiens			IGF1R;EPHA2	Q06124;Q05397	R-HSA-418863;R-HSA-373720
R-HSA-202733	Cell surface interactions at the vascular wall	1	114	2	184	0.00942149	0.418184	0.418184	4	55	0.0056742	48887	Homo sapiens	CD48	P09326	CD48;IGF1R	Q14449;Q06124;Q9BZW8	R-HSA-202722;R-HSA-210294;R-HSA-204873;R-HSA-204813
R-HSA-2871837	FCERI mediated NF-kB activation	1	243	0	65	0.0200826	0.424962	0.424962	1	19	0.00196018	48887	Homo sapiens	PDK1				R-HSA-202534
R-HSA-5358351	Signaling by Hedgehog	1	165	0	130	0.0136364	0.424962	0.424962	2	82	0.00845971	48887	Homo sapiens	P4HB				R-HSA-5358336;R-HSA-5358340
R-HSA-75153	Apoptotic execution phase	0	55	1	243	0.00454545	0.427204	0.427204	1	54	0.00557103	48887	Homo sapiens			EPHA2	Q05397	R-HSA-201634
R-HSA-109704	PI3K Cascade	1	96	1	220	0.00793388	0.428322	0.428322	3	33	0.00340452	48887	Homo sapiens	PDK1	O15530	IGF1R	P31946	R-HSA-109701;R-HSA-109702;R-HSA-5672824
R-HSA-1257604	PIP3 activates AKT signaling	1	144	1	164	0.0119008	0.436089	0.436089	5	31	0.00319818	48887	Homo sapiens	PDK1	O15530	IGF1R	Q00987	R-HSA-2317314;R-HSA-198599;R-HSA-2219524;R-HSA-198270;R-HSA-2316429
R-HSA-202403	TCR signaling	1	148	1	191	0.0122314	0.440481	0.440481	16	52	0.0053647	48887	Homo sapiens	PDK1	O15530	IGF1R	P41240	R-HSA-202466;R-HSA-202534;R-HSA-202437;R-HSA-202500;R-HSA-8855375;R-HSA-202443;R-HSA-202472;R-HSA-202222;R-HSA-202478;R-HSA-202510;R-HSA-202453;R-HSA-202164;R-HSA-202459;R-HSA-202394;R-HSA-202489;R-HSA-203774
R-HSA-3769402	Deactivation of the beta-catenin transactivating complex	0	44	1	282	0.00363636	0.450243	0.450243	4	14	0.00144434	48887	Homo sapiens			IGF1R	P35222	R-HSA-5368580;R-HSA-3772430;R-HSA-3769383;R-HSA-5626938
R-HSA-73923	Lipid digestion, mobilization, and transport	1	149	0	169	0.012314	0.45346	0.45346	2	108	0.0111421	48887	Homo sapiens	P4HB				R-HSA-174786;R-HSA-8866329
R-HSA-422475	Axon guidance	3	594	3	814	0.0490909	0.456989	0.456989	22	285	0.0294027	48887	Homo sapiens	EPHA10;CNTN1;EPHA2	Q12860;Q5JZY3;P29317	CNTN1;IGF1R;EPHA2	Q06124;Q05397;P18433	R-HSA-373733;R-HSA-3928602;R-HSA-3928607;R-HSA-3928604;R-HSA-418863;R-HSA-3928597;R-HSA-443784;R-HSA-3928660;R-HSA-3928628;R-HSA-3928651;R-HSA-4093327;R-HSA-3928584;R-HSA-3928648;R-HSA-8855508;R-HSA-3928591;R-HSA-3928588;R-HSA-3928578;R-HSA-3928642;R-HSA-391868;R-HSA-391865;R-HSA-3928646;R-HSA-373720
R-HSA-198203	PI3K/AKT activation	1	147	1	185	0.0121488	0.461951	0.461951	5	36	0.00371402	48887	Homo sapiens	PDK1	O15530	IGF1R	Q00987	R-HSA-2317314;R-HSA-198599;R-HSA-2219524;R-HSA-198270;R-HSA-2316429
R-HSA-201681	TCF dependent signaling in response to WNT	2	215	1	674	0.0177686	0.479975	0.479975	11	71	0.00732487	48887	Homo sapiens	WIF1;DKK1	Q9Y5W5;O94907	IGF1R	P35222	R-HSA-3769401;R-HSA-3299569;R-HSA-3769370;R-HSA-5368580;R-HSA-201669;R-HSA-201685;R-HSA-3772430;R-HSA-5368586;R-HSA-1458875;R-HSA-3769383;R-HSA-5626938
R-HSA-162599	Late Phase of HIV Life Cycle	1	156	0	196	0.0128926	0.480593	0.480593	10	75	0.00773754	48887	Homo sapiens	MIA				R-HSA-167474;R-HSA-167136;R-HSA-167121;R-HSA-167477;R-HSA-167130;R-HSA-167097;R-HSA-167113;R-HSA-167134;R-HSA-167118;R-HSA-167484
R-HSA-6806003	Regulation of TP53 Expression and Degradation	1	45	1	313	0.00371901	0.489678	0.489678	10	35	0.00361085	48887	Homo sapiens	PDK1	O15530	IGF1R	Q00987	R-HSA-6804741;R-HSA-6795460;R-HSA-198599;R-HSA-6795667;R-HSA-6793666;R-HSA-6795473;R-HSA-6792863;R-HSA-3700992;R-HSA-6793661;R-HSA-6804955
R-HSA-1250342	PI3K events in ERBB4 signaling	1	144	1	231	0.0119008	0.490678	0.490678	6	34	0.00350769	48887	Homo sapiens	PDK1	O15530	IGF1R	P27986;Q00987	R-HSA-2317314;R-HSA-1250353;R-HSA-198599;R-HSA-2219524;R-HSA-198270;R-HSA-2316429
R-HSA-5654720	PI-3K cascade:FGFR4	1	144	1	231	0.0119008	0.490678	0.490678	6	38	0.00392035	48887	Homo sapiens	PDK1	O15530	IGF1R	P27986;Q00987	R-HSA-2317314;R-HSA-198599;R-HSA-2219524;R-HSA-177931;R-HSA-198270;R-HSA-2316429
R-HSA-5654689	PI-3K cascade:FGFR1	1	144	1	231	0.0119008	0.490678	0.490678	6	38	0.00392035	48887	Homo sapiens	PDK1	O15530	IGF1R	P27986;Q00987	R-HSA-2317314;R-HSA-198599;R-HSA-2219524;R-HSA-177931;R-HSA-198270;R-HSA-2316429
R-HSA-5654710	PI-3K cascade:FGFR3	1	144	1	231	0.0119008	0.490678	0.490678	6	38	0.00392035	48887	Homo sapiens	PDK1	O15530	IGF1R	P27986;Q00987	R-HSA-2317314;R-HSA-198599;R-HSA-2219524;R-HSA-177931;R-HSA-198270;R-HSA-2316429
R-HSA-5654695	PI-3K cascade:FGFR2	1	144	1	231	0.0119008	0.490678	0.490678	6	38	0.00392035	48887	Homo sapiens	PDK1	O15530	IGF1R	P27986;Q00987	R-HSA-2317314;R-HSA-198599;R-HSA-2219524;R-HSA-177931;R-HSA-198270;R-HSA-2316429
R-HSA-162587	HIV Life Cycle	1	168	0	201	0.0138843	0.495649	0.495649	10	112	0.0115547	48887	Homo sapiens	MIA				R-HSA-167474;R-HSA-167136;R-HSA-167121;R-HSA-167477;R-HSA-167130;R-HSA-167097;R-HSA-167113;R-HSA-167134;R-HSA-167118;R-HSA-167484
R-HSA-5654700	FRS-mediated FGFR2 signaling	0	265	2	109	0.0219008	0.496638	0.496638	2	47	0.00484886	48887	Homo sapiens			MATK;IGF1R	O43559;Q06124	R-HSA-5654608;R-HSA-5654603
R-HSA-5654706	FRS-mediated FGFR3 signaling	0	265	2	109	0.0219008	0.496638	0.496638	2	47	0.00484886	48887	Homo sapiens			MATK;IGF1R	O43559;Q06124	R-HSA-5654623;R-HSA-5654633
R-HSA-5654693	FRS-mediated FGFR1 signaling	0	265	2	109	0.0219008	0.496638	0.496638	2	47	0.00484886	48887	Homo sapiens			MATK;IGF1R	O43559;Q06124	R-HSA-5654571;R-HSA-5654584
R-HSA-5654712	FRS-mediated FGFR4 signaling	0	265	2	109	0.0219008	0.496638	0.496638	2	47	0.00484886	48887	Homo sapiens			MATK;IGF1R	O43559;Q06124	R-HSA-5654658;R-HSA-5654651
R-HSA-69620	Cell Cycle Checkpoints	0	188	1	210	0.0155372	0.501553	0.501553	2	58	0.0059837	48887	Homo sapiens			IGF1R	Q00987	R-HSA-6804741;R-HSA-6804955
R-HSA-1500931	Cell-Cell communication	0	144	1	261	0.0119008	0.511245	0.511245	1	63	0.00649954	48887	Homo sapiens			MATK	Q14289	R-HSA-391152
R-HSA-1168372	Downstream signaling events of B Cell Receptor (BCR)	1	220	1	182	0.0181818	0.518867	0.518867	5	43	0.00443619	48887	Homo sapiens	PDK1	O15530	IGF1R	Q00987	R-HSA-2317314;R-HSA-198599;R-HSA-2219524;R-HSA-198270;R-HSA-2316429
R-HSA-451927	Interleukin-2 signaling	0	281	1	122	0.0232231	0.519812	0.519812	1	64	0.0066027	48887	Homo sapiens			MATK	Q14289	R-HSA-508513
R-HSA-937061	TRIF-mediated TLR3/TLR4 signaling	0	108	1	316	0.00892562	0.520755	0.520755	1	57	0.00588053	48887	Homo sapiens			IGF1R	Q06124	R-HSA-166271
R-HSA-166166	MyD88-independent TLR3/TLR4 cascade	0	108	1	316	0.00892562	0.520755	0.520755	1	60	0.00619003	48887	Homo sapiens			IGF1R	Q06124	R-HSA-166271
R-HSA-180292	GAB1 signalosome	1	147	1	268	0.0121488	0.523573	0.523573	8	44	0.00453936	48887	Homo sapiens	PDK1	O15530	IGF1R	Q06124;P41240;P27986;Q00987	R-HSA-177923;R-HSA-2317314;R-HSA-198599;R-HSA-2219524;R-HSA-177931;R-HSA-177944;R-HSA-198270;R-HSA-2316429
R-HSA-168164	Toll Like Receptor 3 (TLR3) Cascade	0	108	1	319	0.00892562	0.523573	0.523573	1	61	0.0062932	48887	Homo sapiens			IGF1R	Q06124	R-HSA-166271
R-HSA-5218921	VEGFR2 mediated cell proliferation	1	282	0	131	0.0233058	0.530086	0.530086	1	51	0.00526153	48887	Homo sapiens	PDK1				R-HSA-5218821
R-HSA-170984	ARMS-mediated activation	0	269	1	149	0.0222314	0.541954	0.541954	1	44	0.00453936	48887	Homo sapiens			IGF1R	P31946	R-HSA-169901
R-HSA-8853659	RET signaling	0	289	1	143	0.0238843	0.541954	0.541954	1	63	0.00649954	48887	Homo sapiens			IGF1R	Q06124	R-HSA-8855508
R-HSA-450531	Regulation of mRNA stability by proteins that bind AU-rich elements	0	91	1	340	0.00752066	0.554412	0.554412	3	26	0.00268235	48887	Homo sapiens			IGF1R	P31946	R-HSA-450406;R-HSA-482788;R-HSA-450394
R-HSA-2586552	Signaling by Leptin	0	272	1	169	0.0224793	0.557039	0.557039	1	58	0.0059837	48887	Homo sapiens			IGF1R	Q06124	R-HSA-2671747
R-HSA-169893	Prolonged ERK activation events	0	273	1	170	0.022562	0.55965	0.55965	1	50	0.00515836	48887	Homo sapiens			IGF1R	P31946	R-HSA-169901
R-HSA-201722	Formation of the beta-catenin:TCF transactivating complex	0	66	1	381	0.00545455	0.56397	0.56397	1	13	0.00134117	48887	Homo sapiens			IGF1R	P35222	R-HSA-3299569
R-HSA-166054	Activated TLR4 signalling	0	128	1	351	0.0105785	0.564829	0.564829	1	85	0.00876921	48887	Homo sapiens			IGF1R	Q06124	R-HSA-166271
R-HSA-375165	NCAM signaling for neurite out-growth	0	301	2	149	0.024876	0.566542	0.566542	2	62	0.00639637	48887	Homo sapiens			CNTN1;EPHA2	Q05397;P18433	R-HSA-391868;R-HSA-391865
R-HSA-187687	Signalling to ERKs	0	284	1	171	0.0234711	0.5691	0.5691	1	63	0.00649954	48887	Homo sapiens			IGF1R	P31946	R-HSA-169901
R-HSA-112315	Transmission across Chemical Synapses	1	276	0	171	0.0228099	0.5691	0.5691	1	104	0.0107294	48887	Homo sapiens	PDK1				R-HSA-442739
R-HSA-166016	Toll Like Receptor 4 (TLR4) Cascade	0	141	1	372	0.0116529	0.589853	0.589853	1	94	0.00969772	48887	Homo sapiens			IGF1R	Q06124	R-HSA-166271
R-HSA-2730905	Role of LAT2/NTAL/LAB on calcium mobilization	1	308	1	169	0.0254545	0.593083	0.593083	6	38	0.00392035	48887	Homo sapiens	PDK1	O15530	IGF1R	Q00987	R-HSA-2317314;R-HSA-198599;R-HSA-2219524;R-HSA-202164;R-HSA-198270;R-HSA-2316429
R-HSA-8848021	Signaling by PTK6	0	80	2	409	0.00661157	0.597086	0.597086	3	52	0.0053647	48887	Homo sapiens			MATK;IGF1R	Q5S007;P18031	R-HSA-8849428;R-HSA-8857565;R-HSA-8849435
R-HSA-373760	L1CAM interactions	1	125	0	391	0.0103306	0.623313	0.623313	2	53	0.00546786	48887	Homo sapiens	CNTN1				R-HSA-373733;R-HSA-443784
R-HSA-168898	Toll-Like Receptors Cascades	0	180	1	383	0.014876	0.628504	0.628504	1	161	0.0166099	48887	Homo sapiens			IGF1R	Q06124	R-HSA-166271
R-HSA-512988	Interleukin-3, 5 and GM-CSF signaling	0	290	1	270	0.0239669	0.634352	0.634352	1	77	0.00794388	48887	Homo sapiens			IGF1R	Q06124	R-HSA-914022
R-HSA-195721	Signaling by Wnt	2	329	1	845	0.0271901	0.63617	0.63617	11	153	0.0157846	48887	Homo sapiens	WIF1;DKK1	Q9Y5W5;O94907	IGF1R	P35222	R-HSA-3769401;R-HSA-3299569;R-HSA-3769370;R-HSA-5368580;R-HSA-201669;R-HSA-201685;R-HSA-3772430;R-HSA-5368586;R-HSA-1458875;R-HSA-3769383;R-HSA-5626938
R-HSA-112399	IRS-mediated signalling	1	316	1	256	0.0261157	0.641537	0.641537	3	74	0.00763438	48887	Homo sapiens	PDK1	O15530	IGF1R	P31946	R-HSA-109701;R-HSA-109702;R-HSA-5672824
R-HSA-195258	RHO GTPase Effectors	1	307	0	253	0.0253719	0.642248	0.642248	2	103	0.0106262	48887	Homo sapiens	PDK1				R-HSA-5623632;R-HSA-5623667
R-HSA-109581	Apoptosis	0	176	1	420	0.0145455	0.656186	0.656186	1	121	0.0124832	48887	Homo sapiens			EPHA2	Q05397	R-HSA-201634
R-HSA-3700989	Transcriptional Regulation by TP53	2	476	2	769	0.0393388	0.658386	0.658386	12	248	0.0255855	48887	Homo sapiens	MIA;PDK1	O15530;P49848	EPHA10;IGF1R	Q8N9N5;Q00987	R-HSA-6805399;R-HSA-6804741;R-HSA-6795460;R-HSA-198599;R-HSA-6795667;R-HSA-6793666;R-HSA-6795473;R-HSA-6792863;R-HSA-3700992;R-HSA-6793661;R-HSA-6804955;R-HSA-3221982
R-HSA-74751	Insulin receptor signalling cascade	1	319	1	292	0.0263636	0.663626	0.663626	4	90	0.00928505	48887	Homo sapiens	PDK1	O15530	IGF1R	P31946;Q13322	R-HSA-109701;R-HSA-109702;R-HSA-110011;R-HSA-5672824
R-HSA-5357801	Programmed Cell Death	0	184	1	433	0.0152066	0.66828	0.66828	1	134	0.0138244	48887	Homo sapiens			EPHA2	Q05397	R-HSA-201634
R-HSA-2871796	FCERI mediated MAPK activation	0	442	1	148	0.0365289	0.669598	0.669598	2	59	0.00608687	48887	Homo sapiens			IGF1R	P29353-2	R-HSA-2730844;R-HSA-2730886
R-HSA-74752	Signaling by Insulin receptor	1	344	1	292	0.0284298	0.679962	0.679962	4	99	0.0102136	48887	Homo sapiens	PDK1	O15530	IGF1R	P31946;Q13322	R-HSA-109701;R-HSA-109702;R-HSA-110011;R-HSA-5672824
R-HSA-112316	Neuronal System	1	410	0	212	0.0338843	0.690631	0.690631	1	151	0.0155783	48887	Homo sapiens	PDK1				R-HSA-442739
R-HSA-8864260	Transcriptional regulation by the AP-2 (TFAP2) family of transcription factors	0	49	1	567	0.00404959	0.692478	0.692478	1	41	0.00422986	48887	Homo sapiens			MATK	P04626	R-HSA-8864466
R-HSA-913531	Interferon Signaling	0	291	1	340	0.0240496	0.696745	0.696745	2	50	0.00515836	48887	Homo sapiens			IGF1R	P18031;Q06124	R-HSA-997311;R-HSA-997309
R-HSA-1433557	Signaling by SCF-KIT	1	360	1	300	0.0297521	0.69735	0.69735	6	106	0.0109357	48887	Homo sapiens	PDK1	O15530	IGF1R	Q06124;Q00987	R-HSA-2317314;R-HSA-198599;R-HSA-205238;R-HSA-2219524;R-HSA-198270;R-HSA-2316429
R-HSA-2424491	DAP12 signaling	1	385	1	288	0.0318182	0.707458	0.707458	5	104	0.0107294	48887	Homo sapiens	PDK1	O15530	IGF1R	Q00987	R-HSA-2317314;R-HSA-198599;R-HSA-2219524;R-HSA-198270;R-HSA-2316429
R-HSA-1643685	Disease	4	1373	3	1246	0.113471	0.709253	0.709253	57	826	0.0852161	48887	Homo sapiens	NOTCH1;MIA;DKK1;PDK1	O15530;P46531;O94907;P49848	MATK;EPHA2;IGF1R	P08238;P27986;Q00987	R-HSA-2220964;R-HSA-2220967;R-HSA-2220966;R-HSA-2220971;R-HSA-2666278;R-HSA-2220976;R-HSA-2220979;R-HSA-2220978;R-HSA-2220981;R-HSA-1839114;R-HSA-2220982;R-HSA-5096538;R-HSA-2220985;R-HSA-2220988;R-HSA-2900748;R-HSA-2691211;R-HSA-2691214;R-HSA-2900747;R-HSA-2730752;R-HSA-4396393;R-HSA-2900743;R-HSA-4396392;R-HSA-167474;R-HSA-2900765;R-HSA-2220944;R-HSA-4396402;R-HSA-4396401;R-HSA-2691226;R-HSA-53…
R-HSA-109582	Hemostasis	2	649	3	724	0.0536364	0.711332	0.711332	12	311	0.032085	48887	Homo sapiens	CD48;PDK1	O15530;P09326	CD48;IGF1R;EPHA2	Q14449;P18031;Q06124;P41240;Q05397;P27986;Q9BZW8	R-HSA-202722;R-HSA-210294;R-HSA-354066;R-HSA-432110;R-HSA-377644;R-HSA-204873;R-HSA-443402;R-HSA-437195;R-HSA-377643;R-HSA-204813;R-HSA-437192;R-HSA-198284
R-HSA-194315	Signaling by Rho GTPases	1	422	0	253	0.034876	0.712676	0.712676	2	108	0.0111421	48887	Homo sapiens	PDK1				R-HSA-5623632;R-HSA-5623667
R-HSA-76002	Platelet activation, signaling and aggregation	1	305	2	386	0.0252066	0.716105	0.716105	8	114	0.0117611	48887	Homo sapiens	PDK1	O15530	IGF1R;EPHA2	P18031;P41240;Q05397;P27986	R-HSA-354066;R-HSA-432110;R-HSA-377644;R-HSA-443402;R-HSA-437195;R-HSA-377643;R-HSA-437192;R-HSA-198284
R-HSA-2172127	DAP12 interactions	1	402	1	291	0.0332231	0.717239	0.717239	5	120	0.0123801	48887	Homo sapiens	PDK1	O15530	IGF1R	Q00987	R-HSA-2317314;R-HSA-198599;R-HSA-2219524;R-HSA-198270;R-HSA-2316429
R-HSA-186763	Downstream signal transduction	1	382	1	325	0.0315702	0.723953	0.723953	6	103	0.0106262	48887	Homo sapiens	PDK1	O15530	IGF1R	Q06124;Q00987	R-HSA-2317314;R-HSA-198599;R-HSA-2219524;R-HSA-186778;R-HSA-198270;R-HSA-2316429
R-HSA-983705	Signaling by the B Cell Receptor (BCR)	1	385	1	320	0.0318182	0.728343	0.728343	5	64	0.0066027	48887	Homo sapiens	PDK1	O15530	IGF1R	Q00987	R-HSA-2317314;R-HSA-198599;R-HSA-2219524;R-HSA-198270;R-HSA-2316429
R-HSA-5654708	Downstream signaling of activated FGFR3	1	370	2	351	0.0305785	0.728887	0.728887	8	109	0.0112452	48887	Homo sapiens	PDK1	O15530	MATK;IGF1R	O43559;Q06124;P27986;Q00987	R-HSA-2317314;R-HSA-198599;R-HSA-2219524;R-HSA-5654623;R-HSA-177931;R-HSA-198270;R-HSA-2316429;R-HSA-5654633
R-HSA-5654716	Downstream signaling of activated FGFR4	1	370	2	351	0.0305785	0.728887	0.728887	8	109	0.0112452	48887	Homo sapiens	PDK1	O15530	MATK;IGF1R	O43559;Q06124;P27986;Q00987	R-HSA-2317314;R-HSA-5654658;R-HSA-198599;R-HSA-2219524;R-HSA-177931;R-HSA-5654651;R-HSA-198270;R-HSA-2316429
R-HSA-5654696	Downstream signaling of activated FGFR2	1	370	2	351	0.0305785	0.728887	0.728887	8	109	0.0112452	48887	Homo sapiens	PDK1	O15530	MATK;IGF1R	O43559;Q06124;P27986;Q00987	R-HSA-2317314;R-HSA-198599;R-HSA-2219524;R-HSA-5654608;R-HSA-177931;R-HSA-5654603;R-HSA-198270;R-HSA-2316429
R-HSA-5654687	Downstream signaling of activated FGFR1	1	373	2	351	0.0308264	0.730513	0.730513	8	110	0.0113484	48887	Homo sapiens	PDK1	O15530	MATK;IGF1R	O43559;Q06124;P27986;Q00987	R-HSA-2317314;R-HSA-198599;R-HSA-2219524;R-HSA-177931;R-HSA-5654571;R-HSA-198270;R-HSA-5654584;R-HSA-2316429
R-HSA-4420097	VEGFA-VEGFR2 Pathway	1	369	2	362	0.0304959	0.735864	0.735864	6	115	0.0118642	48887	Homo sapiens	PDK1	O15530	MATK;EPHA2	Q14289;Q05397	R-HSA-4420083;R-HSA-2317314;R-HSA-5218821;R-HSA-5218836;R-HSA-198270;R-HSA-2316429
R-HSA-162906	HIV Infection	1	253	0	475	0.0209091	0.741113	0.741113	10	155	0.0159909	48887	Homo sapiens	MIA				R-HSA-167474;R-HSA-167136;R-HSA-167121;R-HSA-167477;R-HSA-167130;R-HSA-167097;R-HSA-167113;R-HSA-167134;R-HSA-167118;R-HSA-167484
R-HSA-1236394	Signaling by ERBB4	1	366	1	379	0.0302479	0.741113	0.741113	7	115	0.0118642	48887	Homo sapiens	PDK1	O15530	IGF1R	Q06124;P27986;Q00987	R-HSA-2317314;R-HSA-1250353;R-HSA-198599;R-HSA-2219524;R-HSA-198270;R-HSA-1369114;R-HSA-2316429
R-HSA-194138	Signaling by VEGF	1	378	2	378	0.0312397	0.745239	0.745239	6	121	0.0124832	48887	Homo sapiens	PDK1	O15530	MATK;EPHA2	Q14289;Q05397	R-HSA-4420083;R-HSA-2317314;R-HSA-5218821;R-HSA-5218836;R-HSA-198270;R-HSA-2316429
R-HSA-5654743	Signaling by FGFR4	1	373	2	430	0.0308264	0.768228	0.768228	9	127	0.0131022	48887	Homo sapiens	PDK1	O15530	MATK;IGF1R	O43559;Q06124;P27986;Q00987	R-HSA-2317314;R-HSA-5654658;R-HSA-198599;R-HSA-2219524;R-HSA-177931;R-HSA-1549564;R-HSA-5654651;R-HSA-198270;R-HSA-2316429
R-HSA-5654741	Signaling by FGFR3	1	376	2	430	0.0310744	0.769625	0.769625	9	129	0.0133086	48887	Homo sapiens	PDK1	O15530	MATK;IGF1R	O43559;Q06124;P27986;Q00987	R-HSA-2317314;R-HSA-198599;R-HSA-2219524;R-HSA-5654623;R-HSA-177931;R-HSA-1549564;R-HSA-198270;R-HSA-2316429;R-HSA-5654633
R-HSA-5654736	Signaling by FGFR1	1	378	2	431	0.0312397	0.771014	0.771014	9	134	0.0138244	48887	Homo sapiens	PDK1	O15530	MATK;IGF1R	O43559;Q06124;P27986;Q00987	R-HSA-2317314;R-HSA-198599;R-HSA-2219524;R-HSA-177931;R-HSA-1549564;R-HSA-5654571;R-HSA-198270;R-HSA-5654584;R-HSA-2316429
R-HSA-5654738	Signaling by FGFR2	1	405	2	461	0.0334711	0.794678	0.794678	9	132	0.0136181	48887	Homo sapiens	PDK1	O15530	MATK;IGF1R	O43559;Q06124;P27986;Q00987	R-HSA-2317314;R-HSA-198599;R-HSA-2219524;R-HSA-5654608;R-HSA-177931;R-HSA-1549564;R-HSA-5654603;R-HSA-198270;R-HSA-2316429
R-HSA-190236	Signaling by FGFR	1	413	2	462	0.0341322	0.798386	0.798386	15	225	0.0232126	48887	Homo sapiens	PDK1	O15530	MATK;IGF1R	O43559;Q06124;P27986;Q00987	R-HSA-2317314;R-HSA-198599;R-HSA-2219524;R-HSA-5654608;R-HSA-5654623;R-HSA-177931;R-HSA-1549564;R-HSA-5654651;R-HSA-5654584;R-HSA-2316429;R-HSA-5654658;R-HSA-5654571;R-HSA-5654603;R-HSA-198270;R-HSA-5654633
R-HSA-449147	Signaling by Interleukins	1	434	2	506	0.0358678	0.809897	0.809897	19	218	0.0224905	48887	Homo sapiens	IL1B	P01584	MATK;IGF1R	Q14289;Q06124	R-HSA-507719;R-HSA-446694;R-HSA-446692;R-HSA-449058;R-HSA-508513;R-HSA-446862;R-HSA-446894;R-HSA-914022;R-HSA-446701;R-HSA-446634;R-HSA-446868;R-HSA-450133;R-HSA-1112708;R-HSA-446130;R-HSA-448703;R-HSA-446684;R-HSA-445752;R-HSA-446648;R-HSA-445753
R-HSA-187037	NGF signalling via TRKA from the plasma membrane	1	419	1	503	0.0346281	0.812959	0.812959	6	141	0.0145466	48887	Homo sapiens	PDK1	O15530	IGF1R	P31946;Q00987	R-HSA-2317314;R-HSA-198599;R-HSA-2219524;R-HSA-198270;R-HSA-2316429;R-HSA-169901
R-HSA-2454202	Fc epsilon receptor (FCERI) signaling	1	557	1	392	0.0460331	0.821499	0.821499	9	133	0.0137212	48887	Homo sapiens	PDK1	O15530	IGF1R	P29353-2;Q00987	R-HSA-2317314;R-HSA-198599;R-HSA-2730844;R-HSA-2219524;R-HSA-202534;R-HSA-202164;R-HSA-198270;R-HSA-2316429;R-HSA-2730886
R-HSA-177929	Signaling by EGFR	1	392	1	572	0.0323967	0.827217	0.827217	8	136	0.0140307	48887	Homo sapiens	PDK1	O15530	IGF1R	Q06124;P41240;P27986;Q00987	R-HSA-177923;R-HSA-2317314;R-HSA-198599;R-HSA-2219524;R-HSA-177931;R-HSA-177944;R-HSA-198270;R-HSA-2316429
R-HSA-168256	Immune System	5	2059	3	1850	0.170165	0.827414	0.827414	72	1159	0.119571	48887	Homo sapiens	IL1B;CFB;PDK1	ENSG00000125538;O15530;ENST00000263341;P00751;P01584	MATK;IGF1R;EPHA2	P29353-2;P08238;Q14289;P18031;Q06124;P41240;P35222;Q00987	R-HSA-202500;R-HSA-446862;R-HSA-3134883;R-HSA-202510;R-HSA-1369114;R-HSA-981535;R-HSA-446868;R-HSA-1112708;R-HSA-3134904;R-HSA-5660622;R-HSA-202394;R-HSA-3134901;R-HSA-2317314;R-HSA-5660663;R-HSA-166817;R-HSA-449058;R-HSA-2219524;R-HSA-202534;R-HSA-446894;R-HSA-1168445;R-HSA-446634;R-HSA-2316429;R-HSA-173740;R-HSA-2730886;R-HSA-997311;R-HSA-997309;R-HSA-173745;R-HSA-446130;R-HSA-202164;R-HSA-1737…
R-HSA-212436	Generic Transcription Pathway	3	1032	3	1500	0.0852893	0.844729	0.844729	14	342	0.0352832	48887	Homo sapiens	NOTCH1;MIA;PDK1	O15530;P46531;P49848	EPHA10;MATK;IGF1R	P04626;Q8N9N5;Q00987	R-HSA-6804741;R-HSA-6795460;R-HSA-198599;R-HSA-6793666;R-HSA-212356;R-HSA-3221982;R-HSA-6805399;R-HSA-6795667;R-HSA-8864466;R-HSA-6795473;R-HSA-6792863;R-HSA-3700992;R-HSA-6793661;R-HSA-6804955
R-HSA-166520	Signalling by NGF	1	502	1	653	0.0414876	0.876759	0.876759	6	195	0.0201176	48887	Homo sapiens	PDK1	O15530	IGF1R	P31946;Q00987	R-HSA-2317314;R-HSA-198599;R-HSA-2219524;R-HSA-198270;R-HSA-2316429;R-HSA-169901
R-HSA-5663205	Infectious disease	1	508	2	670	0.0419835	0.892012	0.892012	11	311	0.032085	48887	Homo sapiens	MIA	P49848	MATK;EPHA2	P08238	R-HSA-167474;R-HSA-167136;R-HSA-167121;R-HSA-5336420;R-HSA-167477;R-HSA-167130;R-HSA-167097;R-HSA-167113;R-HSA-167134;R-HSA-167118;R-HSA-167484
R-HSA-388396	GPCR downstream signaling	1	1113	1	45	0.0919835	0.898939	0.898939	2	64	0.0066027	48887	Homo sapiens	PDK1	O15530	IGF1R	Q9NZN5	R-HSA-398184;R-HSA-198284
R-HSA-1640170	Cell Cycle	0	638	1	920	0.0527273	0.934286	0.934286	2	376	0.0387909	48887	Homo sapiens			IGF1R	Q00987	R-HSA-6804741;R-HSA-6804955
R-HSA-1280215	Cytokine Signaling in Immune system	1	756	2	825	0.0624793	0.94355	0.94355	23	348	0.0359022	48887	Homo sapiens	IL1B	P01584	MATK;IGF1R	Q14289;P18031;Q06124	R-HSA-507719;R-HSA-446694;R-HSA-446692;R-HSA-449058;R-HSA-508513;R-HSA-446862;R-HSA-446894;R-HSA-914022;R-HSA-446701;R-HSA-1168445;R-HSA-446634;R-HSA-1369114;R-HSA-997311;R-HSA-997309;R-HSA-446868;R-HSA-450133;R-HSA-1112708;R-HSA-446130;R-HSA-448703;R-HSA-446684;R-HSA-445752;R-HSA-446648;R-HSA-445753
R-HSA-556833	Metabolism of lipids and lipoproteins	1	1312	0	425	0.10843	0.96864	0.96864	2	853	0.0880017	48887	Homo sapiens	P4HB				R-HSA-174786;R-HSA-8866329
R-HSA-1280218	Adaptive Immune System	1	1144	1	733	0.0945455	0.970418	0.970418	23	260	0.0268235	48887	Homo sapiens	PDK1	O15530	IGF1R	Q06124;P41240;Q00987	R-HSA-2317314;R-HSA-202466;R-HSA-198599;R-HSA-2219524;R-HSA-202534;R-HSA-202437;R-HSA-202500;R-HSA-8855375;R-HSA-202443;R-HSA-202472;R-HSA-202222;R-HSA-202478;R-HSA-202510;R-HSA-2316429;R-HSA-202453;R-HSA-202164;R-HSA-388829;R-HSA-202459;R-HSA-202394;R-HSA-202489;R-HSA-390329;R-HSA-203774;R-HSA-198270
R-HSA-372790	Signaling by GPCR	1	1473	1	420	0.121736	0.976036	0.976036	2	320	0.0330135	48887	Homo sapiens	PDK1	O15530	IGF1R	Q9NZN5	R-HSA-398184;R-HSA-198284
R-HSA-74160	Gene Expression	3	2085	3	2293	0.172314	0.98758	0.98758	41	768	0.0792324	48887	Homo sapiens	NOTCH1;MIA;PDK1	O15530;P46531;P49848	EPHA10;MATK;IGF1R	P04626;P31946;Q8N9N5;Q00987	R-HSA-6814885;R-HSA-109637;R-HSA-198599;R-HSA-109636;R-HSA-109639;R-HSA-109638;R-HSA-212356;R-HSA-75850;R-HSA-75856;R-HSA-75861;R-HSA-8864466;R-HSA-75095;R-HSA-75862;R-HSA-75864;R-HSA-6810238;R-HSA-6793661;R-HSA-75866;R-HSA-73946;R-HSA-75869;R-HSA-6810235;R-HSA-450394;R-HSA-6810234;R-HSA-6810233;R-HSA-75873;R-HSA-450406;R-HSA-6804741;R-HSA-6795460;R-HSA-482788;R-HSA-6793666;R-HSA-75949;R-HSA-3221…
R-HSA-1430728	Metabolism	3	3351	0	645	0.276942	0.989455	0.989455	5	2062	0.212731	48887	Homo sapiens	CA9;P4HB;PDK1				R-HSA-174786;R-HSA-1475025;R-HSA-203946;R-HSA-8866329;R-HSA-1475017
R-HSA-392499	Metabolism of proteins	0	1656	1	1226	0.13686	0.996264	0.996264	1	625	0.0644795	48887	Homo sapiens			IGF1R	P05019	R-HSA-422048
Rat Reactome Output
Pathway identifier	Pathway name	Species name	Submitted entities found	Mapped entities	Found reaction identifiers
R-RNO-173736	Alternative complement activation	Rattus norvegicus	CFB		R-RNO-183130;R-RNO-174551;R-RNO-173745;R-RNO-183122;R-RNO-183126;R-RNO-173754;R-RNO-173740
R-RNO-174577	Activation of C3 and C5	Rattus norvegicus	CFB		R-RNO-173680;R-RNO-166817
R-RNO-166663	Initial triggering of complement	Rattus norvegicus	CFB		R-RNO-183130;R-RNO-174551;R-RNO-173745;R-RNO-183122;R-RNO-183126;R-RNO-173754;R-RNO-173740
R-RNO-3928663	EPHA-mediated growth cone collapse	Rattus norvegicus	EPHA10;EPHA2		R-RNO-3928651
R-RNO-977606	Regulation of Complement cascade	Rattus norvegicus	CFB		R-RNO-977629;R-RNO-977619;R-RNO-977375;R-RNO-981535;R-RNO-977605;R-RNO-981621;R-RNO-977363
R-RNO-3928665	EPH-ephrin mediated repulsion of cells	Rattus norvegicus	EPHA10;EPHA2		R-RNO-4093327;R-RNO-3928604;R-RNO-3928660;R-RNO-3928607;R-RNO-3928628;R-RNO-3928642
R-RNO-166658	Complement cascade	Rattus norvegicus	CFB		R-RNO-977619;R-RNO-173680;R-RNO-174551;R-RNO-981535;R-RNO-166817;R-RNO-173745;R-RNO-977605;R-RNO-981621;R-RNO-173754;R-RNO-977363;R-RNO-173740;R-RNO-977629;R-RNO-183130;R-RNO-977375;R-RNO-183122;R-RNO-183126
R-RNO-3772470	Negative regulation of TCF-dependent signaling by WNT ligand antagonists	Rattus norvegicus	DKK1		R-RNO-3769401;R-RNO-5368586
R-RNO-2979096	NOTCH2 Activation and Transmission of Signal to the Nucleus	Rattus norvegicus	CNTN1		R-RNO-2974714
R-RNO-1912422	Pre-NOTCH Expression and Processing	Rattus norvegicus	NOTCH1		R-RNO-1912369;R-RNO-1912379;R-RNO-1912372;R-RNO-1912382
R-RNO-1912420	Pre-NOTCH Processing in Golgi	Rattus norvegicus	NOTCH1		R-RNO-1912369;R-RNO-1912379;R-RNO-1912372;R-RNO-1912382
R-RNO-448706	Interleukin-1 processing	Rattus norvegicus	IL1B		R-RNO-449058;R-RNO-448703
R-RNO-157118	Signaling by NOTCH	Rattus norvegicus	NOTCH1;CNTN1		R-RNO-2050606;R-RNO-1980044;R-RNO-1912369;R-RNO-2974714;R-RNO-1912379;R-RNO-1912394;R-RNO-1912372;R-RNO-1980122;R-RNO-1912382
R-RNO-165158	Activation of AKT2	Rattus norvegicus	PDK1		R-RNO-109702;R-RNO-109701
R-RNO-2122948	Activated NOTCH1 Transmits Signal to the Nucleus	Rattus norvegicus	NOTCH1		R-RNO-2050606;R-RNO-1980044;R-RNO-1980122
R-RNO-444257	RSK activation	Rattus norvegicus	PDK1		R-RNO-442739
R-RNO-2122947	NOTCH1 Intracellular Domain Regulates Transcription	Rattus norvegicus	NOTCH1		R-RNO-1912394
R-RNO-1980145	Signaling by NOTCH2	Rattus norvegicus	CNTN1		R-RNO-2974714
R-RNO-8866423	VLDL biosynthesis	Rattus norvegicus	P4HB		R-RNO-8866329
R-RNO-350054	Notch-HLH transcription pathway	Rattus norvegicus	NOTCH1		R-RNO-212356
R-RNO-2682334	EPH-Ephrin signaling	Rattus norvegicus	EPHA10;EPHA2		R-RNO-4093327;R-RNO-3928604;R-RNO-3928660;R-RNO-3928646;R-RNO-3928591;R-RNO-3928607;R-RNO-3928628;R-RNO-3928651;R-RNO-3928642;R-RNO-3928578;R-RNO-3928597
R-RNO-1980143	Signaling by NOTCH1	Rattus norvegicus	NOTCH1		R-RNO-2050606;R-RNO-1980044;R-RNO-1912394;R-RNO-1980122
R-RNO-2428933	SHC-related events triggered by IGF1R	Rattus norvegicus	IGF1R		R-RNO-2404195;R-RNO-5686072;R-RNO-2404193
R-RNO-389357	CD28 dependent PI3K/Akt signaling	Rattus norvegicus	PDK1		R-RNO-198270;R-RNO-2316429;R-RNO-2317314
R-RNO-389513	CTLA4 inhibitory signaling	Rattus norvegicus	PDK1		R-RNO-390329
R-RNO-204174	Regulation of pyruvate dehydrogenase (PDH) complex	Rattus norvegicus	PDK1		R-RNO-203946
R-RNO-174800	Chylomicron-mediated lipid transport	Rattus norvegicus	P4HB		R-RNO-174786
R-RNO-8855121	VLDL interactions	Rattus norvegicus	P4HB		R-RNO-8866329
R-RNO-1592389	Activation of Matrix Metalloproteinases	Rattus norvegicus	ELANE		R-RNO-1592398;R-RNO-1592316
R-RNO-442742	CREB phosphorylation through the activation of Ras	Rattus norvegicus	PDK1		R-RNO-442739
R-RNO-389356	CD28 co-stimulation	Rattus norvegicus	PDK1		R-RNO-198270;R-RNO-2316429;R-RNO-2317314
R-RNO-392451	G beta:gamma signalling through PI3Kgamma	Rattus norvegicus	PDK1		R-RNO-198284
R-RNO-6804757	Regulation of TP53 Degradation	Rattus norvegicus	PDK1		R-RNO-6795473
R-RNO-6806003	Regulation of TP53 Expression and Degradation	Rattus norvegicus	PDK1		R-RNO-6795473
R-RNO-5625740	RHO GTPases activate PKNs	Rattus norvegicus	PDK1		R-RNO-5623632;R-RNO-5623667
R-RNO-354192	Integrin alphaIIb beta3 signaling	Rattus norvegicus	PDK1		R-RNO-432110
R-RNO-5218920	VEGFR2 mediated vascular permeability	Rattus norvegicus	PDK1		R-RNO-198270;R-RNO-2316429;R-RNO-2317314
R-RNO-397795	G-protein beta:gamma signalling	Rattus norvegicus	PDK1		R-RNO-198284
R-RNO-438064	Post NMDA receptor activation events	Rattus norvegicus	PDK1		R-RNO-442739
R-RNO-70268	Pyruvate metabolism	Rattus norvegicus	PDK1		R-RNO-203946
R-RNO-76009	Platelet Aggregation (Plug Formation)	Rattus norvegicus	PDK1		R-RNO-432110
R-RNO-446652	Interleukin-1 signaling	Rattus norvegicus	IL1B		R-RNO-446648;R-RNO-450133;R-RNO-446684;R-RNO-446634;R-RNO-507719;R-RNO-446894;R-RNO-446701;R-RNO-446868;R-RNO-446862;R-RNO-445752;R-RNO-446694;R-RNO-445753;R-RNO-446692;R-RNO-446130
R-RNO-442755	Activation of NMDA receptor upon glutamate binding and postsynaptic events	Rattus norvegicus	PDK1		R-RNO-442739
R-RNO-3299685	Detoxification of Reactive Oxygen Species	Rattus norvegicus	P4HB		R-RNO-3341296
R-RNO-1227986	Signaling by ERBB2	Rattus norvegicus	MATK		R-RNO-1963563
R-RNO-5358346	Hedgehog ligand biogenesis	Rattus norvegicus	P4HB		R-RNO-5358336;R-RNO-5358340
R-RNO-114604	GPVI-mediated activation cascade	Rattus norvegicus	PDK1		R-RNO-198284;R-RNO-437189;R-RNO-437185
R-RNO-174824	Lipoprotein metabolism	Rattus norvegicus	P4HB		R-RNO-174786;R-RNO-8866329
R-RNO-388841	Costimulation by the CD28 family	Rattus norvegicus	PDK1		R-RNO-198270;R-RNO-2316429;R-RNO-390329;R-RNO-2317314
R-RNO-2871837	FCERI mediated NF-kB activation	Rattus norvegicus	PDK1		R-RNO-202534
R-RNO-1650814	Collagen biosynthesis and modifying enzymes	Rattus norvegicus	P4HB		R-RNO-2002460;R-RNO-1981157;R-RNO-1980233;R-RNO-1981104;R-RNO-1981128;R-RNO-1650808;R-RNO-1981120
R-RNO-5362517	Signaling by Retinoic Acid	Rattus norvegicus	PDK1		R-RNO-203946
R-RNO-71406	Pyruvate metabolism and Citric Acid (TCA) cycle	Rattus norvegicus	PDK1		R-RNO-203946
R-RNO-109704	PI3K Cascade	Rattus norvegicus	PDK1		R-RNO-109702;R-RNO-109701
R-RNO-202424	Downstream TCR signaling	Rattus norvegicus	PDK1		R-RNO-202500;R-RNO-202222;R-RNO-202466;R-RNO-202437;R-RNO-202472;R-RNO-202478;R-RNO-202443;R-RNO-202489;R-RNO-202164;R-RNO-202459;R-RNO-202394;R-RNO-202453;R-RNO-202534;R-RNO-202510
R-RNO-5607764	CLEC7A (Dectin-1) signaling	Rattus norvegicus	PDK1		R-RNO-202534
R-RNO-202733	Cell surface interactions at the vascular wall	Rattus norvegicus	CD48		R-RNO-202722
R-RNO-73923	Lipid digestion, mobilization, and transport	Rattus norvegicus	P4HB		R-RNO-174786;R-RNO-8866329
R-RNO-1474290	Collagen formation	Rattus norvegicus	P4HB		R-RNO-2002460;R-RNO-1981157;R-RNO-1980233;R-RNO-1981104;R-RNO-1981128;R-RNO-1650808;R-RNO-1981120
R-RNO-202403	TCR signaling	Rattus norvegicus	PDK1		R-RNO-202500;R-RNO-202222;R-RNO-202466;R-RNO-202437;R-RNO-202472;R-RNO-202478;R-RNO-202443;R-RNO-202489;R-RNO-202164;R-RNO-202459;R-RNO-202394;R-RNO-202453;R-RNO-202534;R-RNO-202510
R-RNO-1474228	Degradation of the extracellular matrix	Rattus norvegicus	ELANE		R-RNO-1592398;R-RNO-1592316;R-RNO-1566962
R-RNO-5621481	C-type lectin receptors (CLRs)	Rattus norvegicus	PDK1		R-RNO-202534
R-RNO-1257604	PIP3 activates AKT signaling	Rattus norvegicus	PDK1		R-RNO-198270;R-RNO-2219524;R-RNO-2316429;R-RNO-2317314
R-RNO-1250342	PI3K events in ERBB4 signaling	Rattus norvegicus	PDK1		R-RNO-198270;R-RNO-2219524;R-RNO-2316429;R-RNO-2317314
R-RNO-5654710	PI-3K cascade:FGFR3	Rattus norvegicus	PDK1		R-RNO-198270;R-RNO-2219524;R-RNO-2316429;R-RNO-2317314
R-RNO-5654720	PI-3K cascade:FGFR4	Rattus norvegicus	PDK1		R-RNO-198270;R-RNO-2219524;R-RNO-2316429;R-RNO-2317314
R-RNO-5654695	PI-3K cascade:FGFR2	Rattus norvegicus	PDK1		R-RNO-198270;R-RNO-2219524;R-RNO-2316429;R-RNO-2317314
R-RNO-5654689	PI-3K cascade:FGFR1	Rattus norvegicus	PDK1		R-RNO-198270;R-RNO-2219524;R-RNO-2316429;R-RNO-2317314
R-RNO-201681	TCF dependent signaling in response to WNT	Rattus norvegicus	DKK1		R-RNO-3769401;R-RNO-5368586
R-RNO-198203	PI3K/AKT activation	Rattus norvegicus	PDK1		R-RNO-198270;R-RNO-2219524;R-RNO-2316429;R-RNO-2317314
R-RNO-180292	GAB1 signalosome	Rattus norvegicus	PDK1		R-RNO-198270;R-RNO-2219524;R-RNO-2316429;R-RNO-2317314
R-RNO-2730905	Role of LAT2/NTAL/LAB on calcium mobilization	Rattus norvegicus	PDK1		R-RNO-198270;R-RNO-2219524;R-RNO-2316429;R-RNO-202164;R-RNO-2317314
R-RNO-5633007	Regulation of TP53 Activity	Rattus norvegicus	PDK1		R-RNO-6795473
R-RNO-5358351	Signaling by Hedgehog	Rattus norvegicus	P4HB		R-RNO-5358336;R-RNO-5358340
R-RNO-112314	Neurotransmitter Receptor Binding And Downstream Transmission In The Postsynaptic Cell	Rattus norvegicus	PDK1		R-RNO-442739
R-RNO-186797	Signaling by PDGF	Rattus norvegicus	THBS4;PDK1		R-RNO-198270;R-RNO-2219524;R-RNO-2316429;R-RNO-2317314;R-RNO-382054
R-RNO-1428517	The citric acid (TCA) cycle and respiratory electron transport	Rattus norvegicus	PDK1		R-RNO-203946
R-RNO-2428928	IRS-related events triggered by IGF1R	Rattus norvegicus	IGF1R;PDK1		R-RNO-2428926;R-RNO-2428930;R-RNO-2428922;R-RNO-109702;R-RNO-109701
R-RNO-2404192	Signaling by Type 1 Insulin-like Growth Factor 1 Receptor (IGF1R)	Rattus norvegicus	IGF1R;PDK1		R-RNO-2428926;R-RNO-2404199;R-RNO-2428930;R-RNO-2428922;R-RNO-2404200;R-RNO-2404195;R-RNO-5686072;R-RNO-2404193;R-RNO-109702;R-RNO-109701
R-RNO-2428924	IGF1R signaling cascade	Rattus norvegicus	IGF1R;PDK1		R-RNO-2428926;R-RNO-2428930;R-RNO-2428922;R-RNO-2404195;R-RNO-5686072;R-RNO-2404193;R-RNO-109702;R-RNO-109701
R-RNO-1474244	Extracellular matrix organization	Rattus norvegicus	P4HB;ELANE		R-RNO-1592398;R-RNO-1592316;R-RNO-2002460;R-RNO-1981157;R-RNO-1566962;R-RNO-1980233;R-RNO-1981104;R-RNO-1981128;R-RNO-1650808;R-RNO-1981120
R-RNO-1168372	Downstream signaling events of B Cell Receptor (BCR)	Rattus norvegicus	PDK1		R-RNO-198270;R-RNO-2219524;R-RNO-2316429;R-RNO-2317314
R-RNO-195721	Signaling by Wnt	Rattus norvegicus	DKK1		R-RNO-3769401;R-RNO-5368586
R-RNO-983705	Signaling by the B Cell Receptor (BCR)	Rattus norvegicus	PDK1		R-RNO-198270;R-RNO-2219524;R-RNO-2316429;R-RNO-2317314
R-RNO-195258	RHO GTPase Effectors	Rattus norvegicus	PDK1		R-RNO-5623632;R-RNO-5623667
R-RNO-5218921	VEGFR2 mediated cell proliferation	Rattus norvegicus	PDK1		R-RNO-5218821
R-RNO-422475	Axon guidance	Rattus norvegicus	EPHA10;EPHA2		R-RNO-4093327;R-RNO-3928604;R-RNO-3928660;R-RNO-3928646;R-RNO-3928591;R-RNO-3928607;R-RNO-3928628;R-RNO-3928651;R-RNO-3928642;R-RNO-3928578;R-RNO-3928597
R-RNO-112315	Transmission across Chemical Synapses	Rattus norvegicus	PDK1		R-RNO-442739
R-RNO-112399	IRS-mediated signalling	Rattus norvegicus	PDK1		R-RNO-109702;R-RNO-109701
R-RNO-3700989	Transcriptional Regulation by TP53	Rattus norvegicus	PDK1		R-RNO-6795473
R-RNO-76002	Platelet activation, signaling and aggregation	Rattus norvegicus	PDK1		R-RNO-198284;R-RNO-437189;R-RNO-432110;R-RNO-437185
R-RNO-74751	Insulin receptor signalling cascade	Rattus norvegicus	PDK1		R-RNO-109702;R-RNO-109701
R-RNO-212436	Generic Transcription Pathway	Rattus norvegicus	NOTCH1;PDK1		R-RNO-6795473;R-RNO-212356
R-RNO-1266738	Developmental Biology	Rattus norvegicus	EPHA10;EPHA2		R-RNO-4093327;R-RNO-3928604;R-RNO-3928660;R-RNO-3928646;R-RNO-3928591;R-RNO-3928607;R-RNO-3928628;R-RNO-3928651;R-RNO-3928642;R-RNO-3928578;R-RNO-3928597
R-RNO-74752	Signaling by Insulin receptor	Rattus norvegicus	PDK1		R-RNO-109702;R-RNO-109701
R-RNO-1433557	Signaling by SCF-KIT	Rattus norvegicus	PDK1		R-RNO-198270;R-RNO-2219524;R-RNO-2316429;R-RNO-2317314
R-RNO-5654708	Downstream signaling of activated FGFR3	Rattus norvegicus	PDK1		R-RNO-198270;R-RNO-2219524;R-RNO-2316429;R-RNO-2317314
R-RNO-5654716	Downstream signaling of activated FGFR4	Rattus norvegicus	PDK1		R-RNO-198270;R-RNO-2219524;R-RNO-2316429;R-RNO-2317314
R-RNO-5654696	Downstream signaling of activated FGFR2	Rattus norvegicus	PDK1		R-RNO-198270;R-RNO-2219524;R-RNO-2316429;R-RNO-2317314
R-RNO-5654687	Downstream signaling of activated FGFR1	Rattus norvegicus	PDK1		R-RNO-198270;R-RNO-2219524;R-RNO-2316429;R-RNO-2317314
R-RNO-5654743	Signaling by FGFR4	Rattus norvegicus	PDK1		R-RNO-198270;R-RNO-2219524;R-RNO-2316429;R-RNO-2317314
R-RNO-2262752	Cellular responses to stress	Rattus norvegicus	P4HB		R-RNO-3341296
R-RNO-5654741	Signaling by FGFR3	Rattus norvegicus	PDK1		R-RNO-198270;R-RNO-2219524;R-RNO-2316429;R-RNO-2317314
R-RNO-5654736	Signaling by FGFR1	Rattus norvegicus	PDK1		R-RNO-198270;R-RNO-2219524;R-RNO-2316429;R-RNO-2317314
R-RNO-186763	Downstream signal transduction	Rattus norvegicus	PDK1		R-RNO-198270;R-RNO-2219524;R-RNO-2316429;R-RNO-2317314
R-RNO-4420097	VEGFA-VEGFR2 Pathway	Rattus norvegicus	PDK1		R-RNO-5218821;R-RNO-198270;R-RNO-2316429;R-RNO-2317314
R-RNO-2424491	DAP12 signaling	Rattus norvegicus	PDK1		R-RNO-198270;R-RNO-2219524;R-RNO-2316429;R-RNO-2317314
R-RNO-177929	Signaling by EGFR	Rattus norvegicus	PDK1		R-RNO-198270;R-RNO-2219524;R-RNO-2316429;R-RNO-2317314
R-RNO-194138	Signaling by VEGF	Rattus norvegicus	PDK1		R-RNO-5218821;R-RNO-198270;R-RNO-2316429;R-RNO-2317314
R-RNO-2172127	DAP12 interactions	Rattus norvegicus	PDK1		R-RNO-198270;R-RNO-2219524;R-RNO-2316429;R-RNO-2317314
R-RNO-1236394	Signaling by ERBB4	Rattus norvegicus	PDK1		R-RNO-198270;R-RNO-2219524;R-RNO-2316429;R-RNO-2317314
R-RNO-2454202	Fc epsilon receptor (FCERI) signaling	Rattus norvegicus	PDK1		R-RNO-202534;R-RNO-198270;R-RNO-2219524;R-RNO-2316429;R-RNO-202164;R-RNO-2317314
R-RNO-5654738	Signaling by FGFR2	Rattus norvegicus	PDK1		R-RNO-198270;R-RNO-2219524;R-RNO-2316429;R-RNO-2317314
R-RNO-190236	Signaling by FGFR	Rattus norvegicus	PDK1		R-RNO-198270;R-RNO-2219524;R-RNO-2316429;R-RNO-2317314
R-RNO-194315	Signaling by Rho GTPases	Rattus norvegicus	PDK1		R-RNO-5623632;R-RNO-5623667
R-RNO-449147	Signaling by Interleukins	Rattus norvegicus	IL1B		R-RNO-446648;R-RNO-450133;R-RNO-446684;R-RNO-446634;R-RNO-507719;R-RNO-446894;R-RNO-446701;R-RNO-446868;R-RNO-449058;R-RNO-446862;R-RNO-448703;R-RNO-445752;R-RNO-446694;R-RNO-445753;R-RNO-446692;R-RNO-446130
R-RNO-168249	Innate Immune System	Rattus norvegicus	CFB;PDK1		R-RNO-977619;R-RNO-173680;R-RNO-174551;R-RNO-981535;R-RNO-166817;R-RNO-173745;R-RNO-977605;R-RNO-981621;R-RNO-173754;R-RNO-977363;R-RNO-202164;R-RNO-173740;R-RNO-977629;R-RNO-183130;R-RNO-977375;R-RNO-202534;R-RNO-183122;R-RNO-198270;R-RNO-183126;R-RNO-2219524;R-RNO-2316429;R-RNO-2317314
R-RNO-187037	NGF signalling via TRKA from the plasma membrane	Rattus norvegicus	PDK1		R-RNO-198270;R-RNO-2219524;R-RNO-2316429;R-RNO-2317314
R-RNO-112316	Neuronal System	Rattus norvegicus	PDK1		R-RNO-442739
R-RNO-109582	Hemostasis	Rattus norvegicus	CD48;PDK1		R-RNO-198284;R-RNO-437189;R-RNO-432110;R-RNO-437185;R-RNO-202722
R-RNO-166520	Signalling by NGF	Rattus norvegicus	PDK1		R-RNO-198270;R-RNO-2219524;R-RNO-2316429;R-RNO-2317314
R-RNO-1280215	Cytokine Signaling in Immune system	Rattus norvegicus	IL1B		R-RNO-446648;R-RNO-450133;R-RNO-446684;R-RNO-446634;R-RNO-507719;R-RNO-446894;R-RNO-446701;R-RNO-446868;R-RNO-449058;R-RNO-446862;R-RNO-448703;R-RNO-445752;R-RNO-446694;R-RNO-445753;R-RNO-446692;R-RNO-446130
R-RNO-1280218	Adaptive Immune System	Rattus norvegicus	PDK1		R-RNO-202500;R-RNO-202222;R-RNO-202466;R-RNO-202437;R-RNO-202472;R-RNO-202478;R-RNO-202443;R-RNO-202489;R-RNO-202164;R-RNO-202459;R-RNO-202394;R-RNO-202453;R-RNO-202534;R-RNO-198270;R-RNO-2219524;R-RNO-2316429;R-RNO-390329;R-RNO-2317314;R-RNO-202510
R-RNO-168256	Immune System	Rattus norvegicus	IL1B;CFB;PDK1		R-RNO-977619;R-RNO-450133;R-RNO-977629;R-RNO-183130;R-RNO-202394;R-RNO-183122;R-RNO-183126;R-RNO-449058;R-RNO-2316429;R-RNO-446648;R-RNO-446684;R-RNO-173745;R-RNO-446634;R-RNO-173754;R-RNO-202437;R-RNO-202443;R-RNO-173740;R-RNO-202453;R-RNO-446701;R-RNO-446868;R-RNO-446862;R-RNO-446694;R-RNO-390329;R-RNO-2317314;R-RNO-446692;R-RNO-446130;R-RNO-202500;R-RNO-174551;R-RNO-981535;R-RNO-981621;R-RNO-2…
R-RNO-74160	Gene Expression	Rattus norvegicus	NOTCH1;PDK1		R-RNO-6795473;R-RNO-212356
R-RNO-556833	Metabolism of lipids and lipoproteins	Rattus norvegicus	P4HB		R-RNO-174786;R-RNO-8866329
R-RNO-388396	GPCR downstream signaling	Rattus norvegicus	PDK1		R-RNO-198284
R-RNO-372790	Signaling by GPCR	Rattus norvegicus	PDK1		R-RNO-198284
R-RNO-162582	Signal Transduction	Rattus norvegicus	NOTCH1;CNTN1;MATK;P4HB;DKK1;THBS4;IGF1R;PDK1		R-RNO-5358336;R-RNO-198284;R-RNO-5218821;R-RNO-5368586;R-RNO-203946;R-RNO-109702;R-RNO-109701;R-RNO-382054;R-RNO-2404199;R-RNO-1980044;R-RNO-2404200;R-RNO-2404195;R-RNO-1912369;R-RNO-2974714;R-RNO-198270;R-RNO-5358340;R-RNO-2316429;R-RNO-5686072;R-RNO-2404193;R-RNO-1963563;R-RNO-5623632;R-RNO-2428922;R-RNO-432110;R-RNO-1912379;R-RNO-1912372;R-RNO-1980122;R-RNO-2428926;R-RNO-2050606;R-RNO-3769401;…
R-RNO-1430728	Metabolism	Rattus norvegicus	P4HB;PDK1		R-RNO-174786;R-RNO-203946;R-RNO-8866329

## Sheet: Group 4
Higher in 24 months as compared to 8 months		Group 4
SeqId	Full_Name	Rank	F Value	Pr > F	q	8m-18m	8m-24m	18m-24m	8m/18m	8m/24m	18m/24m	pair1	pair2	pair3	SomaId	Target	UniProt	EntrezGeneID	EntrezGeneSymbol
3212-30_3	Neutral ceramidase	1	46.49	8.3e-09	7.04e-06	0.00121	7.56e-09	5.89e-05	-0.179	-0.435	-0.256	8m-18m	8m-24m	18m-24m	SL010375	ASAH2	Q9NR71	56624	ASAH2
5236-2_3	NR1D1/nuclear receptor subfamily 1, group D, member 1	2	38.4	4.68e-08	1.33e-05	0.000211	4.83e-08	0.00111	-0.244	-0.472	-0.228	8m-18m	8m-24m	18m-24m	SL007145	NR1D1	P20393	9572	NR1D1
3726-62_4	Parathyroid hormone	3	37.55	5.7e-08	1.33e-05	0.000671	1.27e-08	0.000772	-0.286	-0.555	-0.269	8m-18m	8m-24m	18m-24m	SL003970	PTH	P01270	5741	PTH
3083-71_1	X-linked ectodysplasin-A2 receptor	4	37.13	6.29e-08	1.33e-05	0.000291	2.75e-08	0.0013	-0.458	-0.924	-0.466	8m-18m	8m-24m	18m-24m	SL005233	XEDAR	Q9HAV5	60401	EDA2R
4322-28_3	Amnionless	6	27.97	6.94e-07	9.81e-05	0.00276	1.7e-07	0.00174	-0.191	-0.407	-0.216		8m-24m	18m-24m	SL013489	AMNLS	Q9BXJ7	81693	AMN
3341-33_4	c-abl oncogene 1, non-receptor tyrosine kinase	7	27.34	8.34e-07	0.000101	0.000166	1.46e-06	0.00724	-0.399	-0.748	-0.349	8m-18m	8m-24m		SL006892	ABL1	P00519	25	ABL1
4703-87_2	Tumor necrosis factor ligand superfamily member 1/TNF-beta/Lymphotoxin-alpha	8	26.31	1.14e-06	0.000121	0.000202	1.6e-06	0.0183	-0.446	-0.718	-0.272	8m-18m	8m-24m		SL000597	TNF-b	P01374	4049	LTA
2719-3_4	Granulocyte colony-stimulating factor receptor	9	23.68	2.6e-06	0.000245	0.000149	6.23e-06	0.0155	-0.271	-0.48	-0.209	8m-18m	8m-24m		SL004591	G-CSF-R	Q99062	1441	CSF3R
2851-63_3	Complement C5a	10	21.33	5.76e-06	0.000457	0.00279	2.91e-07	0.0161	-0.141	-0.247	-0.106		8m-24m		SL000320	C5a	P01031	727	C5
4336-2_1	Serum amyloid A	12	19.76	1.01e-05	0.000716	0.000177	1.91e-05	0.0301	-0.284	-0.497	-0.213	8m-18m	8m-24m		SL000572	SAA	P0DJI8	6288	SAA1
5085-18_3	Interleukin-20 receptor subunit alpha	14	18.61	1.56e-05	0.000944	0.00116	3.19e-05	0.0176	-0.173	-0.312	-0.139	8m-18m	8m-24m		SL005181	IL-20 Ra	Q9UHF4	53832	IL20RA
4252-33_4	Nucleoside diphosphate kinase A	19	13.49	0.000133	0.00593	0.0142	0.000407	0.00773	-0.231	-0.532	-0.302		8m-24m		SL003687	Nucleoside diphosphate kinase A	P15531	4830	NME1
3376-49_2	Interleukin-17 receptor D	20	12.07	0.00026	0.011	0.0762	0.000175	0.00499	-0.052	-0.131	-0.079		8m-24m		SL010613	IL-17 RD	Q8NFM7	54756	IL17RD
4695-49_2	alpha-S1-casein	22	10.76	0.000502	0.0187	0.00342	0.000333	0.117	-0.215	-0.351	-0.137		8m-24m		SL001868	CASA	P47710	1446	CSN1S1
4995-16_1	15-hydroxyprostaglandin dehydrogenase [NAD+]	24	10.57	0.000555	0.0196	0.000362	0.00209	0.182	-0.197	-0.287	-0.09	8m-18m	8m-24m		SL003930	HPG-	P15428	3248	HPGD
4964-67_1	Endoplasmic reticulum aminopeptidase 1	29	9.95	0.00077	0.0225	0.0611	0.00102	0.0115	-0.116	-0.275	-0.159		8m-24m		SL007729	ARTS1	Q9NZ08	51752	ERAP1
3804-66_2	Dentin matrix protein 1	30	9.51	0.000976	0.0276	0.0555	6.73e-05	0.0447	-0.123	-0.27	-0.147		8m-24m		SL007403	DMP1	Q13316	1758	DMP1
2788-55_1	Matrix metalloproteinase 3/Stromelysin 1	35	8.21	0.00203	0.0493	0.128	0.000904	0.0159	-0.062	-0.148	-0.086		8m-24m		SL000524	MMP-3	P08254	4314	MMP3
4540-11_2	Chromobox protein homolog 5	36	7.96	0.00236	0.0556	0.0199	0.000924	0.183	-0.091	-0.137	-0.046		8m-24m		SL009768	CBX5	P45973	23468	CBX5
4280-47_2	Proteasome subunit alpha2	40	7.46	0.00318	0.0674	0.0701	0.00136	0.0552	-0.077	-0.173	-0.096		8m-24m		SL008865	PSA2	P25787	5683	PSMA2
2917-3_2	Osteoprotegerin ligand/TRANCE	42	7.33	0.00344	0.0695	0.0855	1.02e-05	0.106	-0.141	-0.276	-0.135		8m-24m		SL002541	sRANKL	O14788	8600	TNFSF11
2741-22_2	Siglec-6	48	6.74	0.00496	0.0865	0.292	0.000661	0.0357	-0.107	-0.382	-0.275		8m-24m		SL005217	Siglec-6	O43699	946	SIGLEC6
3220-40_2	Proto-oncogene tyrosine-protein kinase receptor Ret	63	5.64	0.0101	0.136	0.709	0.00169	0.0221	-0.016	-0.126	-0.111		8m-24m		SL010378	RET	P07949	5979	RET
3320-49_2	Insulin-like growth factor-binding protein 7	71	5.21	0.0136	0.162	0.0502	0.000994	0.337	-0.133	-0.2	-0.067		8m-24m		SL005087	IGFBP-7	Q16270	3490	IGFBP7
Reactome Output
Pathway identifier	Pathway name	#Entities found	#Entities total	#Interactors found	#Interactors total	Entities ratio	Entities pValue	Entities FDR	#Reactions found	#Reactions total	Reactions ratio	Species identifier	Species name	Submitted entities found	Mapped entities	Submitted entities hit interactor	Interacts with	Found reaction identifiers
R-HSA-5669034	TNFs bind their physiological receptors	3	26	0	25	0.00214876	0.000123579	0.0388783	3	11	0.00113484	48887	Homo sapiens	LTA;TNFSF11;EDA2R				R-HSA-5669013;R-HSA-5669035;R-HSA-5669097
R-HSA-5668541	TNFR2 non-canonical NF-kB pathway	4	100	0	53	0.00826446	0.000156767	0.0388783	15	41	0.00422986	48887	Homo sapiens	PSMA2;LTA;TNFSF11;EDA2R				R-HSA-5668534;R-HSA-5669013;R-HSA-5668789;R-HSA-5676595;R-HSA-5607731;R-HSA-5676592;R-HSA-5676593;R-HSA-5668414;R-HSA-5668454;R-HSA-5668481;R-HSA-5676591;R-HSA-5676589;R-HSA-5669035;R-HSA-5668520;R-HSA-5669097
R-HSA-5676594	TNF receptor superfamily (TNFSF) members mediating non-canonical NF-kB pathway	2	17	0	7	0.00140496	0.000692492	0.114261	6	12	0.00123801	48887	Homo sapiens	LTA;TNFSF11				R-HSA-5668789;R-HSA-5676595;R-HSA-5676592;R-HSA-5676593;R-HSA-5676591;R-HSA-5676589
R-HSA-1368071	NR1D1 (REV-ERBA) represses gene expression	2	10	0	32	0.000826446	0.00270504	0.170128	6	6	0.000619003	48887	Homo sapiens	NR1D1				R-HSA-5663271;R-HSA-1368069;R-HSA-5663252;R-HSA-5663265;R-HSA-5663245;R-HSA-5663258
R-HSA-1592389	Activation of Matrix Metalloproteinases	2	35	0	18	0.00289256	0.00434049	0.170128	10	27	0.00278552	48887	Homo sapiens	MMP3				R-HSA-1604712;R-HSA-1592297;R-HSA-1592362;R-HSA-1604731;R-HSA-1604763;R-HSA-1604752;R-HSA-1604690;R-HSA-1592371;R-HSA-1592436;R-HSA-1604359
R-HSA-1280215	Cytokine Signaling in Immune system	8	756	3	825	0.0624793	0.00439132	0.170128	32	348	0.0359022	48887	Homo sapiens	RET;CSF3R;PSMA2;LTA;IL20RA;TNFSF11;IL17RD;EDA2R	P01374;P07949;Q9UHF4;Q8NFM7;O14788;Q99062;Q9HAV5;P25787	RET;CBX5;ABL1	P15498;Q13905;P22681;P51532;P63104	R-HSA-8865605;R-HSA-5669013;R-HSA-912734;R-HSA-5674373;R-HSA-5672965;R-HSA-8854738;R-HSA-5668481;R-HSA-912724;R-HSA-912727;R-HSA-912790;R-HSA-448728;R-HSA-5668534;R-HSA-879917;R-HSA-1112690;R-HSA-5668789;R-HSA-5676595;R-HSA-5607731;R-HSA-5676592;R-HSA-879914;R-HSA-5676593;R-HSA-5668414;R-HSA-5674366;R-HSA-5658430;R-HSA-448744;R-HSA-5668454;R-HSA-912757;R-HSA-5676591;R-HSA-5676589;R-HSA-5669035;R-…
R-HSA-2022090	Assembly of collagen fibrils and other multimeric structures	2	60	0	1	0.00495868	0.00613651	0.170128	1	25	0.00257918	48887	Homo sapiens	MMP3				R-HSA-2213200
R-HSA-168256	Immune System	13	2059	3	1850	0.170165	0.00745633	0.170128	68	1159	0.119571	48887	Homo sapiens	RET;CSF3R;ERAP1;IL20RA;IL17RD;EDA2R;C5;PSMA2;ABL1;LTA;SAA1;TNFSF11;SIGLEC6	P01374;P01031;P07949;Q9UHF4;O43699;Q99062;P00519;Q8NFM7;Q9NZ08;O14788;P0DJI8;Q9HAV5;P25787	RET;CBX5;ABL1	P15498;P19174;Q13905;Q7Z434;P35222;P22681;P51532;P63104	R-HSA-167686;R-HSA-173705;R-HSA-3134883;R-HSA-173709;R-HSA-879362;R-HSA-1168640;R-HSA-983704;R-HSA-3134904;R-HSA-173723;R-HSA-3134901;R-HSA-173720;R-HSA-912790;R-HSA-213407;R-HSA-213406;R-HSA-173725;R-HSA-879917;R-HSA-879914;R-HSA-5674366;R-HSA-2530445;R-HSA-5668454;R-HSA-5685607;R-HSA-2130194;R-HSA-2530453;R-HSA-879411;R-HSA-5669097;R-HSA-8865605;R-HSA-5669013;R-HSA-964811;R-HSA-168909;R-HSA-912…
R-HSA-3359463	Defective CUBN causes hereditary megaloblastic anemia 1	1	4	0	0	0.000330579	0.00763707	0.170128	1	1	0.000103167	48887	Homo sapiens	AMN				R-HSA-3296462
R-HSA-3359462	Defective AMN causes hereditary megaloblastic anemia 1	1	4	0	0	0.000330579	0.00763707	0.170128	1	1	0.000103167	48887	Homo sapiens	AMN				R-HSA-3296477
R-HSA-1442490	Collagen degradation	2	69	0	6	0.00570248	0.00889315	0.170128	8	34	0.00350769	48887	Homo sapiens	MMP3				R-HSA-1454757;R-HSA-1474197;R-HSA-1564179;R-HSA-2484882;R-HSA-1564142;R-HSA-2168923;R-HSA-1564184;R-HSA-1564120
R-HSA-881907	Gastrin-CREB signalling pathway via PKC and MAPK	5	501	1	213	0.041405	0.00892233	0.170128	10	68	0.00701537	48887	Homo sapiens	RET;PSMA2;MMP3;SAA1;IL17RD	P07949;Q8NFM7;P08254;P0DJI8;P25787	ABL1	P00533	R-HSA-749448;R-HSA-5674373;R-HSA-5672965;R-HSA-2179413;R-HSA-749452;R-HSA-5674366;R-HSA-5658430;R-HSA-2179387;R-HSA-2179402;R-HSA-379048
R-HSA-166665	Terminal pathway of complement	1	8	0	0	0.000661157	0.0152178	0.170128	5	5	0.000515836	48887	Homo sapiens	C5				R-HSA-173723;R-HSA-173720;R-HSA-173705;R-HSA-173725;R-HSA-173709
R-HSA-8854691	Interleukin-19, 20, 22, 24	1	9	0	2	0.000743802	0.0171042	0.170128	2	6	0.000619003	48887	Homo sapiens	IL20RA				R-HSA-448744;R-HSA-448728
R-HSA-5632681	Ligand-receptor interactions	0	8	1	2	0.000661157	0.0171042	0.170128	1	4	0.000412669	48887	Homo sapiens			ABL1	Q4KMG0	R-HSA-5632652
R-HSA-2559582	Senescence-Associated Secretory Phenotype (SASP)	2	89	0	19	0.00735537	0.0175722	0.170128	2	22	0.00226968	48887	Homo sapiens	IGFBP7				R-HSA-3797196;R-HSA-3797202
R-HSA-1474290	Collagen formation	2	102	0	7	0.00842975	0.0185154	0.170128	1	40	0.00412669	48887	Homo sapiens	MMP3				R-HSA-2213200
R-HSA-449147	Signaling by Interleukins	5	434	3	506	0.0358678	0.020674	0.170128	17	218	0.0224905	48887	Homo sapiens	RET;CSF3R;PSMA2;IL20RA;IL17RD	P07949;Q9UHF4;Q8NFM7;Q99062;P25787	RET;CBX5;ABL1	P15498;Q13905;P22681;P51532;P63104	R-HSA-879917;R-HSA-8865605;R-HSA-1112690;R-HSA-879914;R-HSA-5674366;R-HSA-5658430;R-HSA-448744;R-HSA-912734;R-HSA-5674373;R-HSA-5672965;R-HSA-8854738;R-HSA-912757;R-HSA-912724;R-HSA-912727;R-HSA-912790;R-HSA-6787737;R-HSA-448728
R-HSA-5673001	RAF/MAP kinase cascade	3	264	0	59	0.0218182	0.0209385	0.170128	4	39	0.00402352	48887	Homo sapiens	RET;PSMA2;IL17RD				R-HSA-5674373;R-HSA-5672965;R-HSA-5674366;R-HSA-5658430
R-HSA-112412	SOS-mediated signalling	3	264	0	59	0.0218182	0.0209385	0.170128	4	41	0.00422986	48887	Homo sapiens	RET;PSMA2;IL17RD				R-HSA-5674373;R-HSA-5672965;R-HSA-5674366;R-HSA-5658430
R-HSA-187706	Signalling to p38 via RIT and RIN	3	269	0	59	0.0222314	0.0218321	0.170128	4	42	0.00433302	48887	Homo sapiens	RET;PSMA2;IL17RD				R-HSA-5674373;R-HSA-5672965;R-HSA-5674366;R-HSA-5658430
R-HSA-912526	Interleukin receptor SHC signaling	3	274	0	59	0.0226446	0.022562	0.170128	4	45	0.00464253	48887	Homo sapiens	RET;PSMA2;IL17RD				R-HSA-5674373;R-HSA-5672965;R-HSA-5674366;R-HSA-5658430
R-HSA-428890	Role of Abl in Robo-Slit signaling	1	12	0	0	0.000991736	0.0227426	0.170128	4	4	0.000412669	48887	Homo sapiens	ABL1				R-HSA-428885;R-HSA-428883;R-HSA-376141;R-HSA-428888
R-HSA-174577	Activation of C3 and C5	1	7	0	5	0.000578512	0.0227426	0.170128	1	3	0.000309502	48887	Homo sapiens	C5				R-HSA-173680
R-HSA-179812	GRB2 events in EGFR signaling	3	264	0	71	0.0218182	0.022932	0.170128	4	42	0.00433302	48887	Homo sapiens	RET;PSMA2;IL17RD				R-HSA-5674373;R-HSA-5672965;R-HSA-5674366;R-HSA-5658430
R-HSA-167044	Signalling to RAS	3	275	0	60	0.0227273	0.022932	0.170128	4	49	0.00505519	48887	Homo sapiens	RET;PSMA2;IL17RD				R-HSA-5674373;R-HSA-5672965;R-HSA-5674366;R-HSA-5658430
R-HSA-444473	Formyl peptide receptors bind formyl peptides and many other ligands	1	11	0	2	0.000909091	0.0246151	0.170128	1	3	0.000309502	48887	Homo sapiens	SAA1				R-HSA-391913
R-HSA-180336	SHC1 events in EGFR signaling	3	264	0	85	0.0218182	0.0248319	0.170128	4	43	0.00443619	48887	Homo sapiens	RET;PSMA2;IL17RD				R-HSA-5674373;R-HSA-5672965;R-HSA-5674366;R-HSA-5658430
R-HSA-1250347	SHC1 events in ERBB4 signaling	3	264	0	85	0.0218182	0.0248319	0.170128	4	43	0.00443619	48887	Homo sapiens	RET;PSMA2;IL17RD				R-HSA-5674373;R-HSA-5672965;R-HSA-5674366;R-HSA-5658430
R-HSA-170968	Frs2-mediated activation	3	271	1	82	0.0223967	0.0258132	0.170128	6	45	0.00464253	48887	Homo sapiens	RET;PSMA2;IL17RD	P07949;Q8NFM7;P25787	ABL1	P46109;Q13905	R-HSA-170978;R-HSA-5674373;R-HSA-5672965;R-HSA-5674366;R-HSA-5658430;R-HSA-170975
R-HSA-1368082	RORA activates gene expression	2	38	0	102	0.0031405	0.0283036	0.170128	4	10	0.00103167	48887	Homo sapiens	NR1D1				R-HSA-400342;R-HSA-1368065;R-HSA-549475;R-HSA-5663273
R-HSA-5654700	FRS-mediated FGFR2 signaling	3	265	0	109	0.0219008	0.0297326	0.170128	4	47	0.00484886	48887	Homo sapiens	RET;PSMA2;IL17RD				R-HSA-5674373;R-HSA-5672965;R-HSA-5674366;R-HSA-5658430
R-HSA-5654693	FRS-mediated FGFR1 signaling	3	265	0	109	0.0219008	0.0297326	0.170128	4	47	0.00484886	48887	Homo sapiens	RET;PSMA2;IL17RD				R-HSA-5674373;R-HSA-5672965;R-HSA-5674366;R-HSA-5658430
R-HSA-5654706	FRS-mediated FGFR3 signaling	3	265	0	109	0.0219008	0.0297326	0.170128	4	47	0.00484886	48887	Homo sapiens	RET;PSMA2;IL17RD				R-HSA-5674373;R-HSA-5672965;R-HSA-5674366;R-HSA-5658430
R-HSA-5654712	FRS-mediated FGFR4 signaling	3	265	0	109	0.0219008	0.0297326	0.170128	4	47	0.00484886	48887	Homo sapiens	RET;PSMA2;IL17RD				R-HSA-5674373;R-HSA-5672965;R-HSA-5674366;R-HSA-5658430
R-HSA-5684996	MAPK1/MAPK3 signaling	3	271	0	114	0.0223967	0.031473	0.170128	4	46	0.00474569	48887	Homo sapiens	RET;PSMA2;IL17RD				R-HSA-5674373;R-HSA-5672965;R-HSA-5674366;R-HSA-5658430
R-HSA-1368108	BMAL1:CLOCK,NPAS2 activates circadian gene expression	2	64	0	92	0.00528926	0.033417	0.170128	2	29	0.00299185	48887	Homo sapiens	NR1D1				R-HSA-5663155;R-HSA-549475
R-HSA-451927	Interleukin-2 signaling	3	281	0	122	0.0232231	0.0351131	0.170128	4	64	0.0066027	48887	Homo sapiens	RET;PSMA2;IL17RD				R-HSA-5674373;R-HSA-5672965;R-HSA-5674366;R-HSA-5658430
R-HSA-879415	Advanced glycosylation endproduct receptor signaling	1	16	0	5	0.00132231	0.0376261	0.170128	2	4	0.000412669	48887	Homo sapiens	SAA1				R-HSA-879411;R-HSA-879362
R-HSA-3000471	Scavenging by Class B Receptors	1	20	0	0	0.00165289	0.0376261	0.170128	2	4	0.000412669	48887	Homo sapiens	SAA1				R-HSA-2512800;R-HSA-2197646
R-HSA-5218921	VEGFR2 mediated cell proliferation	3	282	1	131	0.0233058	0.0377385	0.170128	7	51	0.00526153	48887	Homo sapiens	RET;PSMA2;IL17RD	P07949;Q8NFM7;P25787	RET	P19174	R-HSA-5674373;R-HSA-5672965;R-HSA-167686;R-HSA-5674366;R-HSA-5658430;R-HSA-4420202;R-HSA-4420153
R-HSA-8853659	RET signaling	3	289	1	143	0.0238843	0.0409693	0.170128	28	63	0.00649954	48887	Homo sapiens	RET;PSMA2;IL17RD	P07949;Q8NFM7;P25787	RET	P19174	R-HSA-8854981;R-HSA-8855747;R-HSA-8853762;R-HSA-8855617;R-HSA-8853774;R-HSA-8855564;R-HSA-5674373;R-HSA-8855508;R-HSA-5672965;R-HSA-8853789;R-HSA-8853734;R-HSA-8853793;R-HSA-8853792;R-HSA-5674366;R-HSA-5658430;R-HSA-8855915;R-HSA-8853801;R-HSA-8853737;R-HSA-8853800;R-HSA-8854899;R-HSA-8853745;R-HSA-8854897;R-HSA-8854908;R-HSA-8871227;R-HSA-8853755;R-HSA-8871226;R-HSA-8853753;R-HSA-8854905
R-HSA-170984	ARMS-mediated activation	3	269	1	149	0.0222314	0.0409693	0.170128	5	44	0.00453936	48887	Homo sapiens	RET;PSMA2;IL17RD	P07949;Q8NFM7;P25787	ABL1	P31946	R-HSA-5674373;R-HSA-5672965;R-HSA-5674366;R-HSA-5658430;R-HSA-169901
R-HSA-2142700	Synthesis of Lipoxins (LX)	1	22	0	0	0.00181818	0.0413126	0.170128	1	5	0.000515836	48887	Homo sapiens	HPGD				R-HSA-2161779
R-HSA-1474228	Degradation of the extracellular matrix	2	145	0	30	0.0119835	0.0423751	0.170128	31	100	0.0103167	48887	Homo sapiens	MMP3				R-HSA-4086205;R-HSA-1474197;R-HSA-1604763;R-HSA-1564179;R-HSA-3791295;R-HSA-1604752;R-HSA-1604690;R-HSA-2534248;R-HSA-1564184;R-HSA-1564120;R-HSA-1454791;R-HSA-1566981;R-HSA-3791149;R-HSA-1566979;R-HSA-1604359;R-HSA-1592314;R-HSA-1604731;R-HSA-1566962;R-HSA-1592371;R-HSA-1454781;R-HSA-1592436;R-HSA-1454843;R-HSA-1604712;R-HSA-1592297;R-HSA-2514772;R-HSA-1592362;R-HSA-1454757;R-HSA-2533970;R-HSA-2…
R-HSA-2586552	Signaling by Leptin	3	272	2	169	0.0224793	0.0454018	0.170128	7	58	0.0059837	48887	Homo sapiens	RET;PSMA2;IL17RD	P07949;Q8NFM7;P25787	RET;CSF3R	P40763	R-HSA-5674373;R-HSA-5672965;R-HSA-2671868;R-HSA-2671839;R-HSA-5674366;R-HSA-5658430;R-HSA-2730595
R-HSA-169893	Prolonged ERK activation events	3	273	1	170	0.022562	0.0462083	0.170128	7	50	0.00515836	48887	Homo sapiens	RET;PSMA2;IL17RD	P07949;Q8NFM7;P25787	ABL1	P46109;P31946;Q13905	R-HSA-170978;R-HSA-5674373;R-HSA-5672965;R-HSA-5674366;R-HSA-5658430;R-HSA-170975;R-HSA-169901
R-HSA-375165	NCAM signaling for neurite out-growth	3	301	0	149	0.024876	0.048394	0.170128	4	62	0.00639637	48887	Homo sapiens	RET;PSMA2;IL17RD				R-HSA-5674373;R-HSA-5672965;R-HSA-5674366;R-HSA-5658430
R-HSA-187687	Signalling to ERKs	3	284	1	171	0.0234711	0.0492268	0.170128	7	63	0.00649954	48887	Homo sapiens	RET;PSMA2;IL17RD	P07949;Q8NFM7;P25787	ABL1	P46109;P31946;Q13905	R-HSA-170978;R-HSA-5674373;R-HSA-5672965;R-HSA-5674366;R-HSA-5658430;R-HSA-170975;R-HSA-169901
R-HSA-5223345	Miscellaneous transport and binding events	1	25	0	2	0.00206612	0.0504693	0.170128	1	11	0.00113484	48887	Homo sapiens	CSN1S1				R-HSA-5340124
R-HSA-372790	Signaling by GPCR	7	1473	1	420	0.121736	0.0530533	0.170128	20	320	0.0330135	48887	Homo sapiens	RET;C5;PTH;PSMA2;MMP3;SAA1;IL17RD	P01031;P01270;P07949;Q8NFM7;P08254;P0DJI8;P25787	ABL1	P00533	R-HSA-379044;R-HSA-749448;R-HSA-964811;R-HSA-749454;R-HSA-375395;R-HSA-749452;R-HSA-5674366;R-HSA-5658430;R-HSA-2179402;R-HSA-380073;R-HSA-391913;R-HSA-379048;R-HSA-420489;R-HSA-5674373;R-HSA-5672965;R-HSA-2179413;R-HSA-2179387;R-HSA-749456;R-HSA-744887;R-HSA-744886
R-HSA-3296469	Defects in cobalamin (B12) metabolism	1	31	0	1	0.00256198	0.0577339	0.170128	2	16	0.00165068	48887	Homo sapiens	AMN				R-HSA-3296462;R-HSA-3296477
R-HSA-375276	Peptide ligand-binding receptors	2	200	0	23	0.0165289	0.0678306	0.170128	3	71	0.00732487	48887	Homo sapiens	C5;SAA1				R-HSA-964811;R-HSA-375395;R-HSA-391913
R-HSA-933542	TRAF6 mediated NF-kB activation	1	30	0	9	0.00247934	0.0703179	0.170128	1	4	0.000412669	48887	Homo sapiens	SAA1				R-HSA-168166
R-HSA-376176	Signaling by Robo receptor	1	38	0	1	0.0031405	0.0703179	0.170128	4	18	0.00185701	48887	Homo sapiens	ABL1				R-HSA-428885;R-HSA-428883;R-HSA-376141;R-HSA-428888
R-HSA-1251932	PLCG1 events in ERBB2 signaling	0	6	1	34	0.000495868	0.0721023	0.170128	2	2	0.000206334	48887	Homo sapiens			RET	P19174	R-HSA-1251922;R-HSA-1251944
R-HSA-512988	Interleukin-3, 5 and GM-CSF signaling	3	290	2	270	0.0239669	0.0750235	0.170128	11	77	0.00794388	48887	Homo sapiens	RET;PSMA2;IL17RD	P07949;Q8NFM7;P25787	RET;ABL1	P15498;Q13905;P22681;P63104	R-HSA-879917;R-HSA-912734;R-HSA-5674373;R-HSA-5672965;R-HSA-879914;R-HSA-912757;R-HSA-5674366;R-HSA-5658430;R-HSA-912724;R-HSA-912727;R-HSA-912790
R-HSA-3134963	DEx/H-box helicases activate type I IFN and inflammatory cytokines production	1	16	0	28	0.00132231	0.0774357	0.170128	1	5	0.000515836	48887	Homo sapiens	SAA1				R-HSA-168166
R-HSA-112399	IRS-mediated signalling	3	316	1	256	0.0261157	0.0784764	0.170128	5	74	0.00763438	48887	Homo sapiens	RET;PSMA2;IL17RD	P07949;Q8NFM7;P25787	ABL1	P31946	R-HSA-5674373;R-HSA-5672965;R-HSA-5674366;R-HSA-5658430;R-HSA-5672824
R-HSA-977606	Regulation of Complement cascade	1	30	0	13	0.00247934	0.079207	0.170128	5	32	0.00330135	48887	Homo sapiens	C5				R-HSA-2530453;R-HSA-964811;R-HSA-375395;R-HSA-2530445;R-HSA-2530429
R-HSA-3296482	Defects in vitamin and cofactor metabolism	1	43	0	1	0.00355372	0.079207	0.170128	2	19	0.00196018	48887	Homo sapiens	AMN				R-HSA-3296462;R-HSA-3296477
R-HSA-2428928	IRS-related events triggered by IGF1R	3	320	1	257	0.0264463	0.0795261	0.170128	5	77	0.00794388	48887	Homo sapiens	RET;PSMA2;IL17RD	P07949;Q8NFM7;P25787	ABL1	P31946	R-HSA-5674373;R-HSA-5672965;R-HSA-5674366;R-HSA-5658430;R-HSA-5672824
R-HSA-2428924	IGF1R signaling cascade	3	321	1	257	0.0265289	0.0798773	0.170128	5	82	0.00845971	48887	Homo sapiens	RET;PSMA2;IL17RD	P07949;Q8NFM7;P25787	ABL1	P31946	R-HSA-5674373;R-HSA-5672965;R-HSA-5674366;R-HSA-5658430;R-HSA-5672824
R-HSA-2404192	Signaling by Type 1 Insulin-like Growth Factor 1 Receptor (IGF1R)	3	321	1	257	0.0265289	0.0798773	0.170128	5	84	0.00866605	48887	Homo sapiens	RET;PSMA2;IL17RD	P07949;Q8NFM7;P25787	ABL1	P31946	R-HSA-5674373;R-HSA-5672965;R-HSA-5674366;R-HSA-5658430;R-HSA-5672824
R-HSA-1810476	RIP-mediated NFkB activation via ZBP1	1	28	0	22	0.00231405	0.0862591	0.170128	1	4	0.000412669	48887	Homo sapiens	SAA1				R-HSA-168166
R-HSA-5674135	MAP2K and MAPK activation	1	47	0	0	0.0038843	0.0862591	0.170128	2	8	0.000825338	48887	Homo sapiens	IL17RD				R-HSA-5674373;R-HSA-5674366
R-HSA-74751	Insulin receptor signalling cascade	3	319	1	292	0.0263636	0.089994	0.170128	5	90	0.00928505	48887	Homo sapiens	RET;PSMA2;IL17RD	P07949;Q8NFM7;P25787	ABL1	P31946	R-HSA-5674373;R-HSA-5672965;R-HSA-5674366;R-HSA-5658430;R-HSA-5672824
R-HSA-418890	Role of second messengers in netrin-1 signaling	0	16	1	34	0.00132231	0.0915139	0.170128	1	4	0.000412669	48887	Homo sapiens			RET	P19174	R-HSA-593690
R-HSA-194223	HDL-mediated lipid transport	1	36	0	17	0.00297521	0.0932591	0.170128	2	26	0.00268235	48887	Homo sapiens	AMN				R-HSA-264848;R-HSA-264834
R-HSA-196741	Cobalamin (Cbl, vitamin B12) transport and metabolism	1	49	0	3	0.00404959	0.0932591	0.170128	2	30	0.00309502	48887	Homo sapiens	AMN				R-HSA-3000137;R-HSA-3000103
R-HSA-2871796	FCERI mediated MAPK activation	3	442	0	148	0.0365289	0.0933582	0.170128	4	59	0.00608687	48887	Homo sapiens	RET;PSMA2;IL17RD				R-HSA-5674373;R-HSA-5672965;R-HSA-5674366;R-HSA-5658430
R-HSA-74752	Signaling by Insulin receptor	3	344	1	292	0.0284298	0.0994697	0.170128	5	99	0.0102136	48887	Homo sapiens	RET;PSMA2;IL17RD	P07949;Q8NFM7;P25787	ABL1	P31946	R-HSA-5674373;R-HSA-5672965;R-HSA-5674366;R-HSA-5658430;R-HSA-5672824
R-HSA-174113	SCF-beta-TrCP mediated degradation of Emi1	1	55	0	0	0.00454545	0.100207	0.170128	1	3	0.000309502	48887	Homo sapiens	PSMA2				R-HSA-174203
R-HSA-350562	Regulation of ornithine decarboxylase (ODC)	1	52	0	5	0.00429752	0.100207	0.170128	1	4	0.000412669	48887	Homo sapiens	PSMA2				R-HSA-353125
R-HSA-69017	CDK-mediated phosphorylation and removal of Cdc6	1	53	0	2	0.00438017	0.100207	0.170128	1	4	0.000412669	48887	Homo sapiens	PSMA2				R-HSA-69016
R-HSA-5693548	Sensing of DNA Double Strand Breaks	0	15	1	43	0.00123967	0.100207	0.170128	2	9	0.000928505	48887	Homo sapiens			CBX5	P52292	R-HSA-5684006;R-HSA-5684008
R-HSA-1266695	Interleukin-7 signaling	0	20	1	37	0.00165289	0.100207	0.170128	1	16	0.00165068	48887	Homo sapiens			CBX5	P51532	R-HSA-8865605
R-HSA-180585	Vif-mediated degradation of APOBEC3G	1	56	0	0	0.0046281	0.101936	0.170128	1	4	0.000412669	48887	Homo sapiens	PSMA2				R-HSA-180603
R-HSA-5655291	Signaling by FGFR4 in disease	0	18	1	41	0.0014876	0.101936	0.170128	2	15	0.00154751	48887	Homo sapiens			RET	P19174	R-HSA-5655313;R-HSA-5655336
R-HSA-1474244	Extracellular matrix organization	3	320	0	298	0.0264463	0.102195	0.170128	33	275	0.028371	48887	Homo sapiens	MMP3;DMP1				R-HSA-4086205;R-HSA-1474197;R-HSA-1604763;R-HSA-1564179;R-HSA-4086200;R-HSA-3791295;R-HSA-1604752;R-HSA-1604690;R-HSA-2534248;R-HSA-1564184;R-HSA-1564120;R-HSA-1454791;R-HSA-1566981;R-HSA-3791149;R-HSA-1566979;R-HSA-1604359;R-HSA-1592314;R-HSA-1604731;R-HSA-1566962;R-HSA-1592371;R-HSA-1454781;R-HSA-1592436;R-HSA-1454843;R-HSA-1604712;R-HSA-2213200;R-HSA-1592297;R-HSA-2514772;R-HSA-1592362;R-HSA-1…
R-HSA-389359	CD28 dependent Vav1 pathway	0	17	1	41	0.00140496	0.103662	0.170128	1	6	0.000619003	48887	Homo sapiens			ABL1	P15498	R-HSA-389352
R-HSA-5362768	Hh mutants that don't undergo autocatalytic processing are degraded by ERAD	1	61	0	0	0.00504132	0.110533	0.170128	1	6	0.000619003	48887	Homo sapiens	PSMA2				R-HSA-5387392
R-HSA-2162123	Synthesis of Prostaglandins (PG) and Thromboxanes (TX)	1	58	0	3	0.00479339	0.110533	0.170128	1	32	0.00330135	48887	Homo sapiens	HPGD				R-HSA-2161662
R-HSA-1433557	Signaling by SCF-KIT	3	360	2	300	0.0297521	0.110554	0.170128	6	106	0.0109357	48887	Homo sapiens	RET;PSMA2;IL17RD	P07949;Q8NFM7;P25787	RET;ABL1	P15498;P22681	R-HSA-1433542;R-HSA-5674373;R-HSA-5672965;R-HSA-5674366;R-HSA-5658430;R-HSA-205244
R-HSA-500792	GPCR ligand binding	3	581	0	39	0.0480165	0.112176	0.170128	4	162	0.0167131	48887	Homo sapiens	C5;PTH;SAA1				R-HSA-964811;R-HSA-375395;R-HSA-391913;R-HSA-420489
R-HSA-75815	Ubiquitin-dependent degradation of Cyclin D	1	53	0	10	0.00438017	0.112243	0.170128	1	5	0.000515836	48887	Homo sapiens	PSMA2				R-HSA-75825
R-HSA-69229	Ubiquitin-dependent degradation of Cyclin D1	1	53	0	10	0.00438017	0.112243	0.170128	1	5	0.000515836	48887	Homo sapiens	PSMA2				R-HSA-75825
R-HSA-174084	Autodegradation of Cdh1 by Cdh1:APC/C	1	63	0	0	0.00520661	0.11395	0.170128	1	2	0.000206334	48887	Homo sapiens	PSMA2				R-HSA-174058
R-HSA-68827	CDT1 association with the CDC6:ORC:origin complex	1	59	0	7	0.00487603	0.115653	0.170128	1	3	0.000309502	48887	Homo sapiens	PSMA2				R-HSA-68825
R-HSA-5387390	Hh mutants abrogate ligand secretion	1	64	0	0	0.00528926	0.115653	0.170128	1	7	0.000722171	48887	Homo sapiens	PSMA2				R-HSA-5387392
R-HSA-4641257	Degradation of AXIN	1	57	0	10	0.00471074	0.117353	0.170128	2	8	0.000825338	48887	Homo sapiens	PSMA2				R-HSA-3640874;R-HSA-4641256
R-HSA-2424491	DAP12 signaling	3	385	1	288	0.0318182	0.117514	0.170128	5	104	0.0107294	48887	Homo sapiens	RET;PSMA2;IL17RD	P07949;Q8NFM7;P25787	RET	P19174	R-HSA-5674373;R-HSA-5672965;R-HSA-167686;R-HSA-5674366;R-HSA-5658430
R-HSA-5683057	MAPK family signaling cascades	3	321	0	349	0.0265289	0.117929	0.170128	5	86	0.00887238	48887	Homo sapiens	RET;PSMA2;IL17RD				R-HSA-5674373;R-HSA-5672965;R-HSA-5674366;R-HSA-5658430;R-HSA-5687112
R-HSA-211733	Regulation of activated PAK-2p34 by proteasome mediated degradation	1	50	0	20	0.00413223	0.124123	0.170128	1	2	0.000206334	48887	Homo sapiens	PSMA2				R-HSA-211715
R-HSA-174800	Chylomicron-mediated lipid transport	0	36	1	37	0.00297521	0.124123	0.170128	1	20	0.00206334	48887	Homo sapiens			NR1D1	P06727	R-HSA-174741
R-HSA-2172127	DAP12 interactions	3	402	1	291	0.0332231	0.124642	0.170128	5	120	0.0123801	48887	Homo sapiens	RET;PSMA2;IL17RD	P07949;Q8NFM7;P25787	RET	P19174	R-HSA-5674373;R-HSA-5672965;R-HSA-167686;R-HSA-5674366;R-HSA-5658430
R-HSA-3134973	LRR FLII-interacting protein 1 (LRRFIP1) activates type I IFN production	0	8	1	63	0.000661157	0.125808	0.170128	4	5	0.000515836	48887	Homo sapiens			ABL1	P35222	R-HSA-3134904;R-HSA-3134901;R-HSA-3134883;R-HSA-3134914
R-HSA-174154	APC/C:Cdc20 mediated degradation of Securin	1	67	0	3	0.00553719	0.125808	0.170128	1	3	0.000309502	48887	Homo sapiens	PSMA2				R-HSA-174202
R-HSA-1236978	Cross-presentation of soluble exogenous antigens (endosomes)	1	70	0	0	0.00578512	0.125808	0.170128	1	5	0.000515836	48887	Homo sapiens	PSMA2				R-HSA-1236970
R-HSA-912631	Regulation of signaling by CBL	0	24	2	54	0.00198347	0.127489	0.170128	5	7	0.000722171	48887	Homo sapiens			RET;ABL1	P15498;Q13905;P22681	R-HSA-879917;R-HSA-912734;R-HSA-912724;R-HSA-912727;R-HSA-912790
R-HSA-5676590	NIK-->noncanonical NF-kB signaling	1	61	0	14	0.00504132	0.127489	0.170128	1	9	0.000928505	48887	Homo sapiens	PSMA2				R-HSA-5607731
R-HSA-418594	G alpha (i) signalling events	2	325	0	0	0.0268595	0.128072	0.170128	3	8	0.000825338	48887	Homo sapiens	C5;SAA1				R-HSA-749454;R-HSA-749456;R-HSA-380073
R-HSA-174178	APC/C:Cdh1 mediated degradation of Cdc20 and other APC/C:Cdh1 targeted proteins in late mitosis/early G1	1	72	0	0	0.00595041	0.129168	0.170128	2	4	0.000412669	48887	Homo sapiens	PSMA2				R-HSA-174105;R-HSA-188191
R-HSA-169911	Regulation of Apoptosis	1	51	0	22	0.00421488	0.129168	0.170128	1	4	0.000412669	48887	Homo sapiens	PSMA2				R-HSA-211715
R-HSA-5658442	Regulation of RAS by GAPs	1	70	0	2	0.00578512	0.129168	0.170128	1	5	0.000515836	48887	Homo sapiens	PSMA2				R-HSA-5658430
R-HSA-186763	Downstream signal transduction	3	382	2	325	0.0315702	0.12977	0.170128	8	103	0.0106262	48887	Homo sapiens	RET;PSMA2;IL17RD	P07949;Q8NFM7;P25787	RET;ABL1	P19174;Q13905	R-HSA-382052;R-HSA-1524182;R-HSA-5674373;R-HSA-5672965;R-HSA-167686;R-HSA-5674366;R-HSA-5658430;R-HSA-186765
R-HSA-427389	ERCC6 (CSB) and EHMT2 (G9a) positively regulate rRNA expression	0	49	1	32	0.00404959	0.130843	0.170128	1	4	0.000412669	48887	Homo sapiens			CBX5	Q13185	R-HSA-427383
R-HSA-191273	Cholesterol biosynthesis	0	70	1	4	0.00578512	0.132515	0.170128	1	31	0.00319818	48887	Homo sapiens			CBX5	Q14739	R-HSA-194674
R-HSA-5654708	Downstream signaling of activated FGFR3	3	370	1	351	0.0305785	0.133667	0.170128	7	109	0.0112452	48887	Homo sapiens	RET;PSMA2;IL17RD	P07949;Q8NFM7;P25787	RET	P19174	R-HSA-5654148;R-HSA-5674373;R-HSA-5672965;R-HSA-167686;R-HSA-5654224;R-HSA-5674366;R-HSA-5658430
R-HSA-5654716	Downstream signaling of activated FGFR4	3	370	1	351	0.0305785	0.133667	0.170128	7	109	0.0112452	48887	Homo sapiens	RET;PSMA2;IL17RD	P07949;Q8NFM7;P25787	RET	P19174	R-HSA-5674373;R-HSA-5672965;R-HSA-167686;R-HSA-5654163;R-HSA-5674366;R-HSA-5658430;R-HSA-5654169
R-HSA-5654696	Downstream signaling of activated FGFR2	3	370	1	351	0.0305785	0.133667	0.170128	7	109	0.0112452	48887	Homo sapiens	RET;PSMA2;IL17RD	P07949;Q8NFM7;P25787	RET	P19174	R-HSA-5674373;R-HSA-5672965;R-HSA-167686;R-HSA-5674366;R-HSA-5658430;R-HSA-5654159;R-HSA-5654157
R-HSA-400253	Circadian Clock	2	91	0	259	0.00752066	0.133875	0.170128	13	57	0.00588053	48887	Homo sapiens	NR1D1				R-HSA-5663252;R-HSA-1368119;R-HSA-5663155;R-HSA-549475;R-HSA-5663258;R-HSA-400342;R-HSA-5663271;R-HSA-1368069;R-HSA-1368065;R-HSA-5663265;R-HSA-1368140;R-HSA-5663245;R-HSA-5663273
R-HSA-349425	Autodegradation of the E3 ubiquitin ligase COP1	1	54	0	22	0.00446281	0.134184	0.170128	1	5	0.000515836	48887	Homo sapiens	PSMA2				R-HSA-264458
R-HSA-5654687	Downstream signaling of activated FGFR1	3	373	1	351	0.0308264	0.134975	0.170128	7	110	0.0113484	48887	Homo sapiens	RET;PSMA2;IL17RD	P07949;Q8NFM7;P25787	RET	P19174	R-HSA-5654167;R-HSA-5674373;R-HSA-5672965;R-HSA-5654165;R-HSA-167686;R-HSA-5674366;R-HSA-5658430
R-HSA-983231	Factors involved in megakaryocyte development and platelet production	2	173	0	182	0.0142975	0.135173	0.170128	2	42	0.00433302	48887	Homo sapiens	CBX5;ABL1				R-HSA-994106;R-HSA-1013833
R-HSA-372708	p130Cas linkage to MAPK signaling for integrins	0	22	1	57	0.00181818	0.13585	0.170128	1	3	0.000309502	48887	Homo sapiens			ABL1	P46108	R-HSA-372697
R-HSA-68949	Orc1 removal from chromatin	1	73	0	8	0.00603306	0.13585	0.170128	1	4	0.000412669	48887	Homo sapiens	PSMA2				R-HSA-68948
R-HSA-5607761	Dectin-1 mediated noncanonical NF-kB signaling	1	66	0	14	0.00545455	0.13585	0.170128	1	9	0.000928505	48887	Homo sapiens	PSMA2				R-HSA-5607731
R-HSA-198745	Signalling to STAT3	0	5	2	73	0.000413223	0.137513	0.170128	1	1	0.000103167	48887	Homo sapiens			RET;CSF3R	P40763	R-HSA-198732
R-HSA-525793	Myogenesis	1	32	1	49	0.00264463	0.139173	0.170128	5	14	0.00144434	48887	Homo sapiens	ABL1	P00519	ABL1	Q4KMG0	R-HSA-448951;R-HSA-449200;R-HSA-375138;R-HSA-448958;R-HSA-448957
R-HSA-375170	CDO in myogenesis	1	32	1	49	0.00264463	0.139173	0.170128	5	14	0.00144434	48887	Homo sapiens	ABL1	P00519	ABL1	Q4KMG0	R-HSA-448951;R-HSA-449200;R-HSA-375138;R-HSA-448958;R-HSA-448957
R-HSA-8853338	Signaling by FGFR3 point mutants in cancer	0	40	1	41	0.00330579	0.139173	0.170128	2	19	0.00196018	48887	Homo sapiens			RET	P19174	R-HSA-5655247;R-HSA-5655244
R-HSA-5655332	Signaling by FGFR3 in disease	0	40	1	41	0.00330579	0.139173	0.170128	2	28	0.00288868	48887	Homo sapiens			RET	P19174	R-HSA-5655247;R-HSA-5655244
R-HSA-4420097	VEGFA-VEGFR2 Pathway	3	369	2	362	0.0304959	0.13937	0.170128	9	115	0.0118642	48887	Homo sapiens	RET;PSMA2;IL17RD	P07949;Q8NFM7;P25787	RET;ABL1	P46108;P19174;Q15464	R-HSA-4420099;R-HSA-5674373;R-HSA-5672965;R-HSA-167686;R-HSA-5674366;R-HSA-5658430;R-HSA-5218822;R-HSA-4420202;R-HSA-4420153
R-HSA-4608870	Asymmetric localization of PCP proteins	1	66	0	14	0.00545455	0.142483	0.170128	1	7	0.000722171	48887	Homo sapiens	PSMA2				R-HSA-4608855
R-HSA-68867	Assembly of the pre-replicative complex	1	68	0	22	0.00561983	0.142483	0.170128	1	12	0.00123801	48887	Homo sapiens	PSMA2				R-HSA-68825
R-HSA-499943	Synthesis and interconversion of nucleotide di- and triphosphates	1	71	0	9	0.00586777	0.142483	0.170128	2	29	0.00299185	48887	Homo sapiens	NME1				R-HSA-482621;R-HSA-482619
R-HSA-5358346	Hedgehog ligand biogenesis	1	72	0	8	0.00595041	0.142483	0.170128	1	15	0.00154751	48887	Homo sapiens	PSMA2				R-HSA-5362448
R-HSA-186797	Signaling by PDGF	3	412	2	326	0.0340496	0.143369	0.170128	8	114	0.0117611	48887	Homo sapiens	RET;PSMA2;IL17RD	P07949;Q8NFM7;P25787	RET;ABL1	P19174;Q13905	R-HSA-382052;R-HSA-1524182;R-HSA-5674373;R-HSA-5672965;R-HSA-167686;R-HSA-5674366;R-HSA-5658430;R-HSA-186765
R-HSA-1236394	Signaling by ERBB4	3	366	0	379	0.0302479	0.143816	0.170128	4	115	0.0118642	48887	Homo sapiens	RET;PSMA2;IL17RD				R-HSA-5674373;R-HSA-5672965;R-HSA-5674366;R-HSA-5658430
R-HSA-5678895	Defective CFTR causes cystic fibrosis	1	67	0	17	0.00553719	0.145781	0.170128	1	7	0.000722171	48887	Homo sapiens	PSMA2				R-HSA-8866858
R-HSA-194138	Signaling by VEGF	3	378	2	378	0.0312397	0.147408	0.170128	9	121	0.0124832	48887	Homo sapiens	RET;PSMA2;IL17RD	P07949;Q8NFM7;P25787	RET;ABL1	P46108;P19174;Q15464	R-HSA-4420099;R-HSA-5674373;R-HSA-5672965;R-HSA-167686;R-HSA-5674366;R-HSA-5658430;R-HSA-5218822;R-HSA-4420202;R-HSA-4420153
R-HSA-5663213	RHO GTPases Activate WASPs and WAVEs	1	42	0	49	0.00347107	0.149066	0.170128	1	10	0.00103167	48887	Homo sapiens	ABL1				R-HSA-2130194
R-HSA-69052	Switching of origins to a post-replicative state	1	73	0	25	0.00603306	0.150705	0.170128	2	9	0.000928505	48887	Homo sapiens	PSMA2				R-HSA-68948;R-HSA-69016
R-HSA-1606322	ZBP1(DAI) mediated induction of type I IFNs	1	33	0	59	0.00272727	0.150705	0.170128	1	10	0.00103167	48887	Homo sapiens	SAA1				R-HSA-168166
R-HSA-187577	SCF(Skp2)-mediated degradation of p27/p21	1	62	0	30	0.00512397	0.15234	0.170128	1	7	0.000722171	48887	Homo sapiens	PSMA2				R-HSA-187574
R-HSA-5610780	Degradation of GLI1 by the proteasome	1	62	0	26	0.00512397	0.153972	0.170128	2	6	0.000619003	48887	Homo sapiens	PSMA2				R-HSA-5610758;R-HSA-5610760
R-HSA-174184	Cdc20:Phospho-APC/C mediated degradation of Cyclin A	1	72	0	16	0.00595041	0.153972	0.170128	1	3	0.000309502	48887	Homo sapiens	PSMA2				R-HSA-174255
R-HSA-3000178	ECM proteoglycans	1	78	0	11	0.00644628	0.155601	0.170128	1	22	0.00226968	48887	Homo sapiens	DMP1				R-HSA-4086200
R-HSA-1660662	Glycosphingolipid metabolism	1	84	0	6	0.00694215	0.15885	0.170128	1	30	0.00309502	48887	Homo sapiens	ASAH2				R-HSA-1606583
R-HSA-445989	TAK1 activates NFkB by phosphorylation and activation of IKKs complex	1	37	0	62	0.00305785	0.16047	0.170128	1	4	0.000412669	48887	Homo sapiens	SAA1				R-HSA-168166
R-HSA-69300	Removal of licensing factors from origins	1	75	0	32	0.00619835	0.16047	0.170128	2	11	0.00113484	48887	Homo sapiens	PSMA2				R-HSA-68948;R-HSA-69016
R-HSA-1169091	Activation of NF-kappaB in B cells	1	72	0	25	0.00595041	0.16047	0.170128	1	10	0.00103167	48887	Homo sapiens	PSMA2				R-HSA-1168640
R-HSA-1433559	Regulation of KIT signaling	0	18	1	77	0.0014876	0.162087	0.170128	1	8	0.000825338	48887	Homo sapiens			RET	P22681	R-HSA-205244
R-HSA-179419	APC:Cdc20 mediated degradation of cell cycle proteins prior to satisfation of the cell cycle checkpoint	1	73	0	24	0.00603306	0.163701	0.170128	1	6	0.000619003	48887	Homo sapiens	PSMA2				R-HSA-174255
R-HSA-383280	Nuclear Receptor transcription pathway	1	84	0	13	0.00694215	0.165313	0.170128	1	1	0.000103167	48887	Homo sapiens	NR1D1				R-HSA-376419
R-HSA-69304	Regulation of DNA replication	1	78	0	32	0.00644628	0.165313	0.170128	2	14	0.00144434	48887	Homo sapiens	PSMA2				R-HSA-68948;R-HSA-69016
R-HSA-210990	PECAM1 interactions	0	14	1	85	0.00115702	0.166921	0.170128	1	7	0.000722171	48887	Homo sapiens			RET	P19174	R-HSA-210283
R-HSA-5654743	Signaling by FGFR4	3	373	1	430	0.0308264	0.169112	0.170128	9	127	0.0131022	48887	Homo sapiens	RET;PSMA2;IL17RD	P07949;Q8NFM7;P25787	RET	P19174;P22681	R-HSA-5674373;R-HSA-5672965;R-HSA-167686;R-HSA-5654163;R-HSA-1295622;R-HSA-1295621;R-HSA-5674366;R-HSA-5658430;R-HSA-5654169
R-HSA-8849474	PTK6 Activates STAT3	0	7	2	92	0.000578512	0.170128	0.170128	3	9	0.000928505	48887	Homo sapiens			RET;CSF3R	P40763	R-HSA-8848087;R-HSA-2730595;R-HSA-8848124
R-HSA-176409	APC/C:Cdc20 mediated degradation of mitotic proteins	1	75	0	27	0.00619835	0.170128	0.170128	2	13	0.00134117	48887	Homo sapiens	PSMA2				R-HSA-174202;R-HSA-174255
R-HSA-373080	Class B/2 (Secretin family receptors)	1	90	0	11	0.00743802	0.170128	0.170128	1	17	0.00175384	48887	Homo sapiens	PTH				R-HSA-420489
R-HSA-5654741	Signaling by FGFR3	3	376	1	430	0.0310744	0.17053	0.17053	9	129	0.0133086	48887	Homo sapiens	RET;PSMA2;IL17RD	P07949;Q8NFM7;P25787	RET	P19174;P22681	R-HSA-5654148;R-HSA-5674373;R-HSA-5672965;R-HSA-167686;R-HSA-1295622;R-HSA-5654224;R-HSA-1295621;R-HSA-5674366;R-HSA-5658430
R-HSA-5654736	Signaling by FGFR1	3	378	1	431	0.0312397	0.171952	0.171952	9	134	0.0138244	48887	Homo sapiens	RET;PSMA2;IL17RD	P07949;Q8NFM7;P25787	RET	P19174;P22681	R-HSA-5654167;R-HSA-5674373;R-HSA-5672965;R-HSA-5654165;R-HSA-167686;R-HSA-1295622;R-HSA-1295621;R-HSA-5674366;R-HSA-5658430
R-HSA-1059683	Interleukin-6 signaling	0	16	1	86	0.00132231	0.173323	0.173323	1	19	0.00196018	48887	Homo sapiens			RET	P22681	R-HSA-1112690
R-HSA-69601	Ubiquitin Mediated Degradation of Phosphorylated Cdc25A	1	55	0	49	0.00454545	0.176506	0.176506	1	5	0.000515836	48887	Homo sapiens	PSMA2				R-HSA-69600
R-HSA-69613	p53-Independent G1/S DNA damage checkpoint	1	55	0	49	0.00454545	0.176506	0.176506	1	6	0.000619003	48887	Homo sapiens	PSMA2				R-HSA-69600
R-HSA-69610	p53-Independent DNA Damage Response	1	55	0	49	0.00454545	0.176506	0.176506	1	6	0.000619003	48887	Homo sapiens	PSMA2				R-HSA-69600
R-HSA-389356	CD28 co-stimulation	0	39	1	66	0.00322314	0.176506	0.176506	1	19	0.00196018	48887	Homo sapiens			ABL1	P15498	R-HSA-389352
R-HSA-5655253	Signaling by FGFR2 in disease	0	63	1	47	0.00520661	0.179678	0.179678	2	28	0.00288868	48887	Homo sapiens			RET	P19174	R-HSA-5655343;R-HSA-5654748
R-HSA-8849469	PTK6 Regulates RTKs and Their Effectors AKT1 and DOK1	0	11	1	96	0.000909091	0.182837	0.182837	2	8	0.000825338	48887	Homo sapiens			RET	P22681	R-HSA-8848818;R-HSA-8848829
R-HSA-68874	M/G1 Transition	1	88	0	30	0.00727273	0.182837	0.182837	1	20	0.00206334	48887	Homo sapiens	PSMA2				R-HSA-68825
R-HSA-69002	DNA Replication Pre-Initiation	1	88	0	30	0.00727273	0.182837	0.182837	1	20	0.00206334	48887	Homo sapiens	PSMA2				R-HSA-68825
R-HSA-168249	Innate Immune System	6	1079	2	1181	0.0891736	0.18693	0.18693	28	636	0.0656144	48887	Homo sapiens	RET;C5;PSMA2;SAA1;ABL1;IL17RD	P01031;P00519;P07949;Q8NFM7;P0DJI8;P25787	RET;ABL1	P19174;Q7Z434;P35222	R-HSA-167686;R-HSA-964811;R-HSA-173705;R-HSA-3134883;R-HSA-168909;R-HSA-173709;R-HSA-879362;R-HSA-5674373;R-HSA-5672965;R-HSA-3134904;R-HSA-173723;R-HSA-3134901;R-HSA-173720;R-HSA-2530429;R-HSA-173725;R-HSA-168166;R-HSA-375395;R-HSA-5607731;R-HSA-5674366;R-HSA-5658430;R-HSA-2530445;R-HSA-3134914;R-HSA-2130194;R-HSA-173680;R-HSA-2530453;R-HSA-5607724;R-HSA-936564;R-HSA-879411
R-HSA-2892247	POU5F1 (OCT4), SOX2, NANOG activate genes related to proliferation	0	21	2	92	0.00173554	0.190685	0.190685	1	16	0.00165068	48887	Homo sapiens			RET;CSF3R	P40763	R-HSA-452515
R-HSA-5610783	Degradation of GLI2 by the proteasome	1	62	0	51	0.00512397	0.192246	0.192246	1	5	0.000515836	48887	Homo sapiens	PSMA2				R-HSA-5610757
R-HSA-4641258	Degradation of DVL	1	57	0	59	0.00471074	0.193804	0.193804	2	7	0.000722171	48887	Homo sapiens	PSMA2				R-HSA-1504193;R-HSA-4641260
R-HSA-5610785	GLI3 is processed to GLI3R by the proteasome	1	62	0	54	0.00512397	0.193804	0.193804	1	5	0.000515836	48887	Homo sapiens	PSMA2				R-HSA-5610754
R-HSA-5654738	Signaling by FGFR2	3	405	1	461	0.0334711	0.198135	0.198135	9	132	0.0136181	48887	Homo sapiens	RET;PSMA2;IL17RD	P07949;Q8NFM7;P25787	RET	P19174;P22681	R-HSA-5674373;R-HSA-5672965;R-HSA-167686;R-HSA-1295622;R-HSA-1295621;R-HSA-5674366;R-HSA-5658430;R-HSA-5654159;R-HSA-5654157
R-HSA-373076	Class A/1 (Rhodopsin-like receptors)	2	399	0	31	0.0329752	0.198215	0.198215	3	138	0.0142371	48887	Homo sapiens	C5;SAA1				R-HSA-964811;R-HSA-375395;R-HSA-391913
R-HSA-5619084	ABC transporter disorders	1	102	0	17	0.00842975	0.20155	0.20155	1	22	0.00226968	48887	Homo sapiens	PSMA2				R-HSA-8866858
R-HSA-190236	Signaling by FGFR	3	413	1	462	0.0341322	0.202599	0.202599	15	225	0.0232126	48887	Homo sapiens	RET;PSMA2;IL17RD	P07949;Q8NFM7;P25787	RET	P19174;P22681	R-HSA-5654167;R-HSA-5654165;R-HSA-167686;R-HSA-5654163;R-HSA-5654224;R-HSA-5674366;R-HSA-5658430;R-HSA-5654169;R-HSA-5654148;R-HSA-5674373;R-HSA-5672965;R-HSA-1295622;R-HSA-1295621;R-HSA-5654159;R-HSA-5654157
R-HSA-6783589	Interleukin-6 family signaling	0	32	1	92	0.00264463	0.204629	0.204629	1	36	0.00371402	48887	Homo sapiens			RET	P22681	R-HSA-1112690
R-HSA-176814	Activation of APC/C and APC/C:Cdc20 mediated degradation of mitotic proteins	1	76	0	49	0.00628099	0.206163	0.206163	2	15	0.00154751	48887	Homo sapiens	PSMA2				R-HSA-174202;R-HSA-174255
R-HSA-1489509	DAG and IP3 signaling	0	45	1	78	0.00371901	0.209225	0.209225	1	17	0.00175384	48887	Homo sapiens			RET	P19174	R-HSA-167686
R-HSA-167021	PLC-gamma1 signalling	0	47	1	78	0.0038843	0.210751	0.210751	3	19	0.00196018	48887	Homo sapiens			RET	P19174	R-HSA-167686;R-HSA-167684;R-HSA-167674
R-HSA-212718	EGFR interacts with phospholipase C-gamma	0	47	1	78	0.0038843	0.210751	0.210751	3	20	0.00206334	48887	Homo sapiens			RET	P19174	R-HSA-212706;R-HSA-167686;R-HSA-212713
R-HSA-427359	SIRT1 negatively regulates rRNA Expression	0	46	1	85	0.00380165	0.21834	0.21834	1	5	0.000515836	48887	Homo sapiens			CBX5	O43463	R-HSA-427528
R-HSA-1236382	Constitutive Signaling by Ligand-Responsive EGFR Cancer Variants	0	38	1	96	0.0031405	0.21834	0.21834	3	23	0.00237285	48887	Homo sapiens			RET	P19174;P22681	R-HSA-1247842;R-HSA-1247841;R-HSA-1225949
R-HSA-5637815	Signaling by Ligand-Responsive EGFR Variants in Cancer	0	38	1	96	0.0031405	0.21834	0.21834	3	23	0.00237285	48887	Homo sapiens			RET	P19174;P22681	R-HSA-1247842;R-HSA-1247841;R-HSA-1225949
R-HSA-114604	GPVI-mediated activation cascade	0	64	1	71	0.00528926	0.21834	0.21834	1	25	0.00257918	48887	Homo sapiens			ABL1	P15498	R-HSA-442273
R-HSA-187037	NGF signalling via TRKA from the plasma membrane	3	419	3	503	0.0346281	0.221213	0.221213	11	141	0.0145466	48887	Homo sapiens	RET;PSMA2;IL17RD	P07949;Q8NFM7;P25787	RET;CSF3R;ABL1	P40763;P46109;P31946;P19174;Q13905	R-HSA-170978;R-HSA-5674373;R-HSA-5672965;R-HSA-167686;R-HSA-167684;R-HSA-5674366;R-HSA-5658430;R-HSA-167674;R-HSA-170975;R-HSA-169901;R-HSA-198732
R-HSA-69239	Synthesis of DNA	1	111	0	36	0.00917355	0.221355	0.221355	2	26	0.00268235	48887	Homo sapiens	PSMA2				R-HSA-68948;R-HSA-69016
R-HSA-8852276	The role of GTSE1 in G2/M progression after G2 checkpoint	1	82	0	58	0.00677686	0.228846	0.228846	1	10	0.00103167	48887	Homo sapiens	PSMA2				R-HSA-8852354
R-HSA-450513	Tristetraprolin (TTP, ZFP36) binds and destabilizes mRNA	0	19	1	121	0.00157025	0.231822	0.231822	1	4	0.000412669	48887	Homo sapiens			ABL1	P31946	R-HSA-450394
R-HSA-5654227	Phospholipase C-mediated cascade; FGFR3	0	60	1	78	0.00495868	0.231822	0.231822	3	20	0.00206334	48887	Homo sapiens			RET	P19174	R-HSA-5654148;R-HSA-167686;R-HSA-5654224
R-HSA-4641262	Disassembly of the destruction complex and recruitment of AXIN to the membrane	0	33	1	113	0.00272727	0.231822	0.231822	1	7	0.000722171	48887	Homo sapiens			ABL1	P35222	R-HSA-201685
R-HSA-2454202	Fc epsilon receptor (FCERI) signaling	3	557	0	392	0.0460331	0.232975	0.232975	5	133	0.0137212	48887	Homo sapiens	RET;PSMA2;IL17RD				R-HSA-5674373;R-HSA-5672965;R-HSA-5674366;R-HSA-5658430;R-HSA-5607724
R-HSA-422475	Axon guidance	4	594	2	814	0.0490909	0.233293	0.233293	34	285	0.0294027	48887	Homo sapiens	RET;PSMA2;ABL1;IL17RD	P00519;P07949;Q8NFM7;P25787	RET;ABL1	P19174;P00533	R-HSA-8854981;R-HSA-8855747;R-HSA-8853762;R-HSA-8855617;R-HSA-376141;R-HSA-8853774;R-HSA-445069;R-HSA-8855564;R-HSA-428885;R-HSA-5674373;R-HSA-8855508;R-HSA-5672965;R-HSA-593690;R-HSA-428883;R-HSA-8853789;R-HSA-428888;R-HSA-8853734;R-HSA-8853793;R-HSA-8853792;R-HSA-5674366;R-HSA-5658430;R-HSA-8855915;R-HSA-8853801;R-HSA-8853737;R-HSA-8853800;R-HSA-8854899;R-HSA-8853745;R-HSA-8854897;R-HSA-8854908…
R-HSA-5654228	Phospholipase C-mediated cascade; FGFR4	0	61	1	78	0.00504132	0.233307	0.233307	3	20	0.00206334	48887	Homo sapiens			RET	P19174	R-HSA-167686;R-HSA-5654163;R-HSA-5654169
R-HSA-202433	Generation of second messenger molecules	0	58	1	92	0.00479339	0.234788	0.234788	5	17	0.00175384	48887	Homo sapiens			RET	P19174	R-HSA-202354;R-HSA-202212;R-HSA-202331;R-HSA-213407;R-HSA-213406
R-HSA-176408	Regulation of APC/C activators between G1/S and early anaphase	1	82	0	68	0.00677686	0.236267	0.236267	1	14	0.00144434	48887	Homo sapiens	PSMA2				R-HSA-174203
R-HSA-5654219	Phospholipase C-mediated cascade: FGFR1	0	64	1	78	0.00528926	0.237743	0.237743	3	20	0.00206334	48887	Homo sapiens			RET	P19174	R-HSA-5654167;R-HSA-5654165;R-HSA-167686
R-HSA-5655302	Signaling by FGFR1 in disease	0	57	1	92	0.00471074	0.240686	0.240686	2	35	0.00361085	48887	Homo sapiens			RET	P19174	R-HSA-1839100;R-HSA-1839094
R-HSA-177929	Signaling by EGFR	3	392	2	572	0.0323967	0.241233	0.241233	12	136	0.0140307	48887	Homo sapiens	RET;PSMA2;IL17RD	P07949;Q8NFM7;P25787	RET;ABL1	P19174;P00533;P22681	R-HSA-212706;R-HSA-5674373;R-HSA-5672965;R-HSA-177942;R-HSA-167686;R-HSA-5674366;R-HSA-5658430;R-HSA-183035;R-HSA-212713;R-HSA-183055;R-HSA-182988;R-HSA-183052
R-HSA-450408	AUF1 (hnRNP D0) binds and destabilizes mRNA	1	56	0	92	0.0046281	0.242154	0.242154	1	4	0.000412669	48887	Homo sapiens	PSMA2				R-HSA-450466
R-HSA-5654221	Phospholipase C-mediated cascade; FGFR2	0	67	1	78	0.00553719	0.242154	0.242154	3	20	0.00206334	48887	Homo sapiens			RET	P19174	R-HSA-167686;R-HSA-5654159;R-HSA-5654157
R-HSA-983170	Antigen Presentation: Folding, assembly and peptide loading of class I MHC	1	120	0	31	0.00991736	0.242154	0.242154	1	15	0.00154751	48887	Homo sapiens	ERAP1				R-HSA-983158
R-HSA-5638303	Inhibition of Signaling by Overexpressed EGFR	0	6	1	142	0.000495868	0.245081	0.245081	1	2	0.000206334	48887	Homo sapiens			ABL1	P00533	R-HSA-1248677
R-HSA-5638302	Signaling by Overexpressed Wild-Type EGFR in Cancer	0	6	1	142	0.000495868	0.245081	0.245081	1	2	0.000206334	48887	Homo sapiens			ABL1	P00533	R-HSA-1248677
R-HSA-69541	Stabilization of p53	1	57	0	95	0.00471074	0.245081	0.245081	1	15	0.00154751	48887	Homo sapiens	PSMA2				R-HSA-264458
R-HSA-69306	DNA Replication	1	120	0	52	0.00991736	0.249451	0.249451	3	47	0.00484886	48887	Homo sapiens	PSMA2				R-HSA-68948;R-HSA-68825;R-HSA-69016
R-HSA-5689603	UCH proteinases	1	98	0	98	0.00809917	0.250902	0.250902	2	11	0.00113484	48887	Homo sapiens	PSMA2				R-HSA-5665854;R-HSA-5665871
R-HSA-180534	Vpu mediated degradation of CD4	1	53	0	103	0.00438017	0.25235	0.25235	1	5	0.000515836	48887	Homo sapiens	PSMA2				R-HSA-180573
R-HSA-5685938	HDR through Single Strand Annealing (SSA)	1	39	0	119	0.00322314	0.25235	0.25235	1	6	0.000619003	48887	Homo sapiens	ABL1				R-HSA-5686587
R-HSA-2559583	Cellular Senescence	2	194	1	351	0.0160331	0.252857	0.252857	3	87	0.00897555	48887	Homo sapiens	IGFBP7	Q16270;ENSG00000163453	CBX5	Q09028	R-HSA-3797196;R-HSA-3797202;R-HSA-3240957
R-HSA-69656	Cyclin A:Cdk2-associated events at S phase entry	1	74	0	94	0.0061157	0.255239	0.255239	1	18	0.00185701	48887	Homo sapiens	PSMA2				R-HSA-187574
R-HSA-2179392	EGFR Transactivation by Gastrin	1	12	1	144	0.000991736	0.25668	0.25668	3	6	0.000619003	48887	Homo sapiens	MMP3	P08254	ABL1	P00533	R-HSA-2179413;R-HSA-2179387;R-HSA-2179402
R-HSA-351202	Metabolism of polyamines	1	142	0	16	0.0117355	0.258118	0.258118	1	38	0.00392035	48887	Homo sapiens	PSMA2				R-HSA-353125
R-HSA-382556	ABC-family proteins mediated transport	1	127	0	35	0.0104959	0.260985	0.260985	1	29	0.00299185	48887	Homo sapiens	PSMA2				R-HSA-8866553
R-HSA-6804114	TP53 Regulates Transcription of Genes Involved in G2 Cell Cycle Arrest	0	21	1	142	0.00173554	0.263842	0.263842	2	11	0.00113484	48887	Homo sapiens			ABL1	P31947	R-HSA-6803890;R-HSA-6803871
R-HSA-1295596	Spry regulation of FGF signaling	0	17	1	145	0.00140496	0.263842	0.263842	2	11	0.00113484	48887	Homo sapiens			RET	P22681	R-HSA-1295622;R-HSA-1295621
R-HSA-5632684	Hedgehog 'on' state	1	90	1	76	0.00743802	0.265266	0.265266	3	37	0.00381719	48887	Homo sapiens	PSMA2	P25787	ABL1	Q4KMG0	R-HSA-5632652;R-HSA-5635868;R-HSA-5635854
R-HSA-983169	Class I MHC mediated antigen processing & presentation	2	478	0	61	0.0395041	0.270068	0.270068	4	44	0.00453936	48887	Homo sapiens	PSMA2;ERAP1				R-HSA-983150;R-HSA-1236935;R-HSA-1236970;R-HSA-983158
R-HSA-182971	EGFR downregulation	0	28	1	145	0.00231405	0.272348	0.272348	4	21	0.00216651	48887	Homo sapiens			RET	P22681	R-HSA-183035;R-HSA-183055;R-HSA-182988;R-HSA-183052
R-HSA-174143	APC/C-mediated degradation of cell cycle proteins	1	90	0	88	0.00743802	0.272348	0.272348	6	38	0.00392035	48887	Homo sapiens	PSMA2				R-HSA-174202;R-HSA-174058;R-HSA-174203;R-HSA-174105;R-HSA-188191;R-HSA-174255
R-HSA-453276	Regulation of mitotic cell cycle	1	90	0	88	0.00743802	0.272348	0.272348	6	38	0.00392035	48887	Homo sapiens	PSMA2				R-HSA-174202;R-HSA-174058;R-HSA-174203;R-HSA-174105;R-HSA-188191;R-HSA-174255
R-HSA-450385	Butyrate Response Factor 1 (BRF1) binds and destabilizes mRNA	0	19	1	151	0.00157025	0.275163	0.275163	2	6	0.000619003	48887	Homo sapiens			ABL1	P31946	R-HSA-450406;R-HSA-482788
R-HSA-418555	G alpha (s) signalling events	1	167	0	0	0.0138017	0.275163	0.275163	3	10	0.00103167	48887	Homo sapiens	PTH				R-HSA-379044;R-HSA-744887;R-HSA-744886
R-HSA-450604	KSRP (KHSRP) binds and destabilizes mRNA	0	20	1	151	0.00165289	0.277966	0.277966	1	5	0.000515836	48887	Homo sapiens			ABL1	P63104	R-HSA-450620
R-HSA-936440	Negative regulators of RIG-I/MDA5 signaling	0	37	1	140	0.00305785	0.277966	0.277966	1	13	0.00134117	48887	Homo sapiens			ABL1	Q7Z434	R-HSA-936564
R-HSA-2151201	Transcriptional activation of mitochondrial biogenesis	1	66	0	112	0.00545455	0.28076	0.28076	1	27	0.00278552	48887	Homo sapiens	NR1D1				R-HSA-1368140
R-HSA-2142753	Arachidonic acid metabolism	1	163	0	8	0.0134711	0.28076	0.28076	2	80	0.00825338	48887	Homo sapiens	HPGD				R-HSA-2161779;R-HSA-2161662
R-HSA-5654732	Negative regulation of FGFR3 signaling	0	34	1	145	0.00280992	0.286315	0.286315	2	14	0.00144434	48887	Homo sapiens			RET	P22681	R-HSA-1295622;R-HSA-1295621
R-HSA-428157	Sphingolipid metabolism	1	150	0	26	0.0123967	0.286315	0.286315	1	59	0.00608687	48887	Homo sapiens	ASAH2				R-HSA-1606583
R-HSA-5654733	Negative regulation of FGFR4 signaling	0	35	1	145	0.00289256	0.287698	0.287698	2	14	0.00144434	48887	Homo sapiens			RET	P22681	R-HSA-1295622;R-HSA-1295621
R-HSA-452723	Transcriptional regulation of pluripotent stem cells	0	56	2	124	0.0046281	0.289077	0.289077	1	35	0.00361085	48887	Homo sapiens			RET;CSF3R	P40763	R-HSA-452515
R-HSA-1226099	Signaling by FGFR in disease	0	92	1	98	0.00760331	0.293201	0.293201	8	106	0.0109357	48887	Homo sapiens			RET	P19174	R-HSA-1839100;R-HSA-5655313;R-HSA-5655343;R-HSA-5655247;R-HSA-1839094;R-HSA-5655244;R-HSA-5654748;R-HSA-5655336
R-HSA-354192	Integrin alphaIIb beta3 signaling	0	37	1	152	0.00305785	0.294571	0.294571	1	24	0.00247601	48887	Homo sapiens			ABL1	P46108	R-HSA-372697
R-HSA-5654727	Negative regulation of FGFR2 signaling	0	41	1	145	0.00338843	0.295938	0.295938	2	14	0.00144434	48887	Homo sapiens			RET	P22681	R-HSA-1295622;R-HSA-1295621
R-HSA-5654726	Negative regulation of FGFR1 signaling	0	39	1	147	0.00322314	0.295938	0.295938	2	15	0.00154751	48887	Homo sapiens			RET	P22681	R-HSA-1295622;R-HSA-1295621
R-HSA-69580	p53-Dependent G1/S DNA damage checkpoint	1	68	0	126	0.00561983	0.297302	0.297302	1	22	0.00226968	48887	Homo sapiens	PSMA2				R-HSA-264458
R-HSA-69563	p53-Dependent G1 DNA Damage Response	1	68	0	126	0.00561983	0.297302	0.297302	1	22	0.00226968	48887	Homo sapiens	PSMA2				R-HSA-264458
R-HSA-1592230	Mitochondrial biogenesis	1	78	0	112	0.00644628	0.297302	0.297302	1	29	0.00299185	48887	Homo sapiens	NR1D1				R-HSA-1368140
R-HSA-69481	G2/M Checkpoints	1	154	0	44	0.0127273	0.298664	0.298664	1	24	0.00247601	48887	Homo sapiens	PSMA2				R-HSA-8852354
R-HSA-445144	Signal transduction by L1	0	25	1	165	0.00206612	0.302734	0.302734	1	11	0.00113484	48887	Homo sapiens			ABL1	P00533	R-HSA-445069
R-HSA-202424	Downstream TCR signaling	1	124	0	85	0.0102479	0.302734	0.302734	1	24	0.00247601	48887	Homo sapiens	PSMA2				R-HSA-5607724
R-HSA-388841	Costimulation by the CD28 family	0	96	1	97	0.00793388	0.302734	0.302734	1	34	0.00350769	48887	Homo sapiens			ABL1	P15498	R-HSA-389352
R-HSA-2173789	TGF-beta receptor signaling activates SMADs	0	36	1	165	0.00297521	0.306781	0.306781	2	39	0.00402352	48887	Homo sapiens			RET	P22681	R-HSA-4332235;R-HSA-4332236
R-HSA-4615885	SUMOylation of DNA replication proteins	0	48	1	153	0.00396694	0.309467	0.309467	1	8	0.000825338	48887	Homo sapiens			ABL1	P11387	R-HSA-4641362
R-HSA-76009	Platelet Aggregation (Plug Formation)	0	49	1	152	0.00404959	0.310806	0.310806	1	27	0.00278552	48887	Homo sapiens			ABL1	P46108	R-HSA-372697
R-HSA-69615	G1/S DNA Damage Checkpoints	1	70	0	138	0.00578512	0.313477	0.313477	2	28	0.00288868	48887	Homo sapiens	PSMA2				R-HSA-69600;R-HSA-264458
R-HSA-1227986	Signaling by ERBB2	0	55	1	151	0.00454545	0.313477	0.313477	2	38	0.00392035	48887	Homo sapiens			RET	P19174	R-HSA-1251922;R-HSA-1251944
R-HSA-69202	Cyclin E associated events during G1/S transition	1	73	0	137	0.00603306	0.313477	0.313477	1	20	0.00206334	48887	Homo sapiens	PSMA2				R-HSA-187574
R-HSA-4086400	PCP/CE pathway	1	99	0	101	0.00818182	0.313477	0.313477	1	24	0.00247601	48887	Homo sapiens	PSMA2				R-HSA-4608855
R-HSA-2467813	Separation of Sister Chromatids	1	188	0	19	0.0155372	0.314808	0.314808	1	8	0.000825338	48887	Homo sapiens	PSMA2				R-HSA-174202
R-HSA-912446	Meiotic recombination	0	60	1	150	0.00495868	0.316137	0.316137	2	8	0.000825338	48887	Homo sapiens			ABL1	O43196	R-HSA-912429;R-HSA-912496
R-HSA-166520	Signalling by NGF	3	502	3	653	0.0414876	0.32877	0.32877	11	195	0.0201176	48887	Homo sapiens	RET;PSMA2;IL17RD	P07949;Q8NFM7;P25787	RET;CSF3R;ABL1	P40763;P46109;P31946;P19174;Q13905	R-HSA-170978;R-HSA-5674373;R-HSA-5672965;R-HSA-167686;R-HSA-167684;R-HSA-5674366;R-HSA-5658430;R-HSA-167674;R-HSA-170975;R-HSA-169901;R-HSA-198732
R-HSA-5610787	Hedgehog 'off' state	1	122	0	93	0.0100826	0.330594	0.330594	4	32	0.00330135	48887	Homo sapiens	PSMA2				R-HSA-5610757;R-HSA-5610758;R-HSA-5610754;R-HSA-5610760
R-HSA-68882	Mitotic Anaphase	1	202	0	20	0.0166942	0.334485	0.334485	1	11	0.00113484	48887	Homo sapiens	PSMA2				R-HSA-174202
R-HSA-1236974	ER-Phagosome pathway	1	182	0	40	0.0150413	0.343479	0.343479	1	9	0.000928505	48887	Homo sapiens	PSMA2				R-HSA-1236935
R-HSA-5637810	Constitutive Signaling by EGFRvIII	0	26	2	207	0.00214876	0.348566	0.348566	4	18	0.00185701	48887	Homo sapiens			RET;ABL1	P19174;P00533;P22681	R-HSA-5637794;R-HSA-5637792;R-HSA-1247999;R-HSA-5637800
R-HSA-5637812	Signaling by EGFRvIII in Cancer	0	26	2	207	0.00214876	0.348566	0.348566	4	18	0.00185701	48887	Homo sapiens			RET;ABL1	P19174;P00533;P22681	R-HSA-5637794;R-HSA-5637792;R-HSA-1247999;R-HSA-5637800
R-HSA-166658	Complement cascade	1	211	0	13	0.017438	0.351095	0.351095	11	60	0.00619003	48887	Homo sapiens	C5				R-HSA-173680;R-HSA-2530453;R-HSA-964811;R-HSA-375395;R-HSA-173723;R-HSA-173720;R-HSA-2530445;R-HSA-2530429;R-HSA-173705;R-HSA-173725;R-HSA-173709
R-HSA-174824	Lipoprotein metabolism	1	85	1	149	0.00702479	0.356125	0.356125	3	73	0.00753121	48887	Homo sapiens	AMN	Q9BXJ7	NR1D1	P06727	R-HSA-264848;R-HSA-264834;R-HSA-174741
R-HSA-2029485	Role of phospholipids in phagocytosis	0	197	1	34	0.016281	0.358626	0.358626	1	12	0.00123801	48887	Homo sapiens			RET	P19174	R-HSA-167686
R-HSA-1643713	Signaling by EGFR in Cancer	0	38	2	207	0.0031405	0.363599	0.363599	8	42	0.00433302	48887	Homo sapiens			RET;ABL1	P19174;P00533;P22681	R-HSA-1247842;R-HSA-1247841;R-HSA-5637794;R-HSA-1248677;R-HSA-5637792;R-HSA-1247999;R-HSA-5637800;R-HSA-1225949
R-HSA-196849	Metabolism of water-soluble vitamins and cofactors	1	209	0	29	0.0172727	0.364837	0.364837	2	119	0.0122769	48887	Homo sapiens	AMN				R-HSA-3000137;R-HSA-3000103
R-HSA-5250913	Positive epigenetic regulation of rRNA expression	0	81	1	172	0.00669421	0.367305	0.367305	1	7	0.000722171	48887	Homo sapiens			CBX5	Q13185	R-HSA-427383
R-HSA-2555396	Mitotic Metaphase and Anaphase	1	203	0	47	0.0167769	0.367305	0.367305	1	12	0.00123801	48887	Homo sapiens	PSMA2				R-HSA-174202
R-HSA-165159	mTOR signalling	0	47	1	215	0.0038843	0.368536	0.368536	1	26	0.00268235	48887	Homo sapiens			ABL1	P31946	R-HSA-5672824
R-HSA-1236975	Antigen processing-Cross presentation	1	203	0	40	0.0167769	0.369764	0.369764	2	21	0.00216651	48887	Homo sapiens	PSMA2				R-HSA-1236935;R-HSA-1236970
R-HSA-69242	S Phase	1	143	0	131	0.0118182	0.37099	0.37099	4	53	0.00546786	48887	Homo sapiens	PSMA2				R-HSA-75825;R-HSA-187574;R-HSA-68948;R-HSA-69016
R-HSA-69206	G1/S Transition	1	119	0	148	0.00983471	0.37099	0.37099	1	34	0.00350769	48887	Homo sapiens	PSMA2				R-HSA-187574
R-HSA-5668914	Diseases of metabolism	1	218	0	26	0.0180165	0.372214	0.372214	2	95	0.00980089	48887	Homo sapiens	AMN				R-HSA-3296462;R-HSA-3296477
R-HSA-109703	PKB-mediated events	0	49	1	218	0.00404959	0.374654	0.374654	1	28	0.00288868	48887	Homo sapiens			ABL1	P31946	R-HSA-5672824
R-HSA-416476	G alpha (q) signalling events	1	240	0	6	0.0198347	0.378298	0.378298	3	20	0.00206334	48887	Homo sapiens	SAA1				R-HSA-749448;R-HSA-749452;R-HSA-379048
R-HSA-2173782	Binding and Uptake of Ligands by Scavenger Receptors	1	236	0	12	0.0195041	0.379508	0.379508	2	32	0.00330135	48887	Homo sapiens	SAA1				R-HSA-2512800;R-HSA-2197646
R-HSA-388396	GPCR downstream signaling	3	1113	0	45	0.0919835	0.380377	0.380377	9	64	0.0066027	48887	Homo sapiens	C5;PTH;SAA1				R-HSA-379044;R-HSA-749448;R-HSA-749454;R-HSA-749452;R-HSA-749456;R-HSA-744887;R-HSA-380073;R-HSA-744886;R-HSA-379048
R-HSA-977225	Amyloid fiber formation	1	80	1	176	0.00661157	0.381921	0.381921	6	25	0.00257918	48887	Homo sapiens	SAA1	P0DJI8	ABL1	P37840	R-HSA-976734;R-HSA-5660757;R-HSA-5661157;R-HSA-5658496;R-HSA-977136;R-HSA-5661161
R-HSA-2559580	Oxidative Stress Induced Senescence	0	109	1	164	0.00900826	0.387914	0.387914	1	38	0.00392035	48887	Homo sapiens			CBX5	Q09028	R-HSA-3240957
R-HSA-5250941	Negative epigenetic regulation of rRNA expression	0	90	1	179	0.00743802	0.389106	0.389106	1	12	0.00123801	48887	Homo sapiens			CBX5	O43463	R-HSA-427528
R-HSA-15869	Metabolism of nucleotides	1	248	0	11	0.0204959	0.393851	0.393851	2	136	0.0140307	48887	Homo sapiens	NME1				R-HSA-482621;R-HSA-482619
R-HSA-5689880	Ub-specific processing proteases	1	206	0	70	0.0170248	0.400902	0.400902	1	40	0.00412669	48887	Homo sapiens	PSMA2				R-HSA-5689539
R-HSA-5619115	Disorders of transmembrane transporters	1	245	0	27	0.0202479	0.406717	0.406717	1	87	0.00897555	48887	Homo sapiens	PSMA2				R-HSA-8866858
R-HSA-1989781	PPARA activates gene expression	1	170	0	109	0.0140496	0.412478	0.412478	1	42	0.00433302	48887	Homo sapiens	NR1D1				R-HSA-1368065
R-HSA-1834949	Cytosolic sensors of pathogen-associated DNA	1	86	1	207	0.00710744	0.413623	0.413623	5	45	0.00464253	48887	Homo sapiens	SAA1	P0DJI8	ABL1	P35222	R-HSA-168166;R-HSA-3134904;R-HSA-3134901;R-HSA-3134883;R-HSA-3134914
R-HSA-556833	Metabolism of lipids and lipoproteins	4	1312	2	425	0.10843	0.414938	0.414938	8	853	0.0880017	48887	Homo sapiens	AMN;ASAH2;HPGD;NR1D1	Q9BXJ7;P20393;Q9NR71;P15428	CBX5;NR1D1	P06727;Q14739	R-HSA-194674;R-HSA-2161779;R-HSA-264848;R-HSA-1368065;R-HSA-264834;R-HSA-174741;R-HSA-2161662;R-HSA-1606583
R-HSA-6791312	TP53 Regulates Transcription of Cell Cycle Genes	0	64	1	231	0.00528926	0.415908	0.415908	2	39	0.00402352	48887	Homo sapiens			ABL1	P31947	R-HSA-6803890;R-HSA-6803871
R-HSA-373752	Netrin-1 signaling	0	50	1	239	0.00413223	0.415908	0.415908	1	31	0.00319818	48887	Homo sapiens			RET	P19174	R-HSA-593690
R-HSA-202733	Cell surface interactions at the vascular wall	0	114	1	184	0.00942149	0.418184	0.418184	1	55	0.0056742	48887	Homo sapiens			RET	P19174	R-HSA-210283
R-HSA-3858494	Beta-catenin independent WNT signaling	1	163	0	130	0.0134711	0.422711	0.422711	1	50	0.00515836	48887	Homo sapiens	PSMA2				R-HSA-4608855
R-HSA-5358351	Signaling by Hedgehog	1	165	1	130	0.0136364	0.424962	0.424962	8	82	0.00845971	48887	Homo sapiens	PSMA2	P25787	ABL1	Q4KMG0	R-HSA-5610757;R-HSA-5362448;R-HSA-5610758;R-HSA-5610754;R-HSA-5632652;R-HSA-5635868;R-HSA-5635854;R-HSA-5610760
R-HSA-2871837	FCERI mediated NF-kB activation	1	243	0	65	0.0200826	0.424962	0.424962	1	19	0.00196018	48887	Homo sapiens	PSMA2				R-HSA-5607724
R-HSA-109704	PI3K Cascade	0	96	1	220	0.00793388	0.428322	0.428322	1	33	0.00340452	48887	Homo sapiens			ABL1	P31946	R-HSA-5672824
R-HSA-400206	Regulation of lipid metabolism by Peroxisome proliferator-activated receptor alpha (PPARalpha)	1	173	0	125	0.0142975	0.429438	0.429438	1	45	0.00464253	48887	Homo sapiens	NR1D1				R-HSA-1368065
R-HSA-5693565	Recruitment and ATM-mediated phosphorylation of repair and signaling proteins at DNA double strand breaks	1	66	0	242	0.00545455	0.430551	0.430551	1	35	0.00361085	48887	Homo sapiens	ABL1				R-HSA-5686578
R-HSA-2029482	Regulation of actin dynamics for phagocytic cup formation	1	225	0	84	0.018595	0.43388	0.43388	1	24	0.00247601	48887	Homo sapiens	ABL1				R-HSA-2130194
R-HSA-983695	Antigen activates B Cell Receptor (BCR) leading to generation of second messengers	0	177	1	126	0.0146281	0.436089	0.436089	1	17	0.00175384	48887	Homo sapiens			ABL1	P15498	R-HSA-983704
R-HSA-975138	TRAF6 mediated induction of NFkB and MAP kinases upon TLR7/8 or 9 activation	1	93	0	236	0.00768595	0.438289	0.438289	1	47	0.00484886	48887	Homo sapiens	SAA1				R-HSA-168166
R-HSA-168928	RIG-I/MDA5 mediated induction of IFN-alpha/beta pathways	1	87	1	231	0.00719008	0.439386	0.439386	3	46	0.00474569	48887	Homo sapiens	SAA1	P0DJI8	ABL1	Q7Z434	R-HSA-168166;R-HSA-936564;R-HSA-168909
R-HSA-202403	TCR signaling	1	148	1	191	0.0122314	0.440481	0.440481	6	52	0.0053647	48887	Homo sapiens	PSMA2	P25787	RET	P19174	R-HSA-202354;R-HSA-202212;R-HSA-202331;R-HSA-5607724;R-HSA-213407;R-HSA-213406
R-HSA-975871	MyD88 cascade initiated on plasma membrane	1	91	0	250	0.00752066	0.448088	0.448088	1	57	0.00588053	48887	Homo sapiens	SAA1				R-HSA-168166
R-HSA-168142	Toll Like Receptor 10 (TLR10) Cascade	1	91	0	250	0.00752066	0.448088	0.448088	1	58	0.0059837	48887	Homo sapiens	SAA1				R-HSA-168166
R-HSA-168176	Toll Like Receptor 5 (TLR5) Cascade	1	91	0	250	0.00752066	0.448088	0.448088	1	58	0.0059837	48887	Homo sapiens	SAA1				R-HSA-168166
R-HSA-3769402	Deactivation of the beta-catenin transactivating complex	0	44	1	282	0.00363636	0.450243	0.450243	5	14	0.00144434	48887	Homo sapiens			ABL1	P35222;P63104	R-HSA-5368580;R-HSA-3772430;R-HSA-3769393;R-HSA-3769383;R-HSA-5626938
R-HSA-5607764	CLEC7A (Dectin-1) signaling	1	120	0	222	0.00991736	0.451317	0.451317	2	45	0.00464253	48887	Homo sapiens	PSMA2				R-HSA-5607731;R-HSA-5607724
R-HSA-73923	Lipid digestion, mobilization, and transport	1	149	1	169	0.012314	0.45346	0.45346	3	108	0.0111421	48887	Homo sapiens	AMN	Q9BXJ7	NR1D1	P06727	R-HSA-264848;R-HSA-264834;R-HSA-174741
R-HSA-5693606	DNA Double Strand Break Response	1	74	1	264	0.0061157	0.458782	0.458782	3	44	0.00453936	48887	Homo sapiens	ABL1	P00519	CBX5	P52292	R-HSA-5684006;R-HSA-5686578;R-HSA-5684008
R-HSA-975155	MyD88 dependent cascade initiated on endosome	1	95	0	259	0.00785124	0.461951	0.461951	1	62	0.00639637	48887	Homo sapiens	SAA1				R-HSA-168166
R-HSA-168181	Toll Like Receptor 7/8 (TLR7/8) Cascade	1	95	0	259	0.00785124	0.461951	0.461951	1	63	0.00649954	48887	Homo sapiens	SAA1				R-HSA-168166
R-HSA-168138	Toll Like Receptor 9 (TLR9) Cascade	1	98	0	259	0.00809917	0.465102	0.465102	1	66	0.00680904	48887	Homo sapiens	SAA1				R-HSA-168166
R-HSA-983168	Antigen processing: Ubiquitination & Proteasome degradation	1	330	0	0	0.0272727	0.472386	0.472386	1	8	0.000825338	48887	Homo sapiens	PSMA2				R-HSA-983150
R-HSA-196854	Metabolism of vitamins and cofactors	1	296	0	44	0.0244628	0.476505	0.476505	2	162	0.0167131	48887	Homo sapiens	AMN				R-HSA-3000137;R-HSA-3000103
R-HSA-166058	MyD88:Mal cascade initiated on plasma membrane	1	107	0	268	0.00884298	0.480593	0.480593	1	62	0.00639637	48887	Homo sapiens	SAA1				R-HSA-168166
R-HSA-168188	Toll Like Receptor TLR6:TLR2 Cascade	1	107	0	269	0.00884298	0.48161	0.48161	1	64	0.0066027	48887	Homo sapiens	SAA1				R-HSA-168166
R-HSA-168179	Toll Like Receptor TLR1:TLR2 Cascade	1	110	0	269	0.00909091	0.48465	0.48465	1	64	0.0066027	48887	Homo sapiens	SAA1				R-HSA-168166
R-HSA-181438	Toll Like Receptor 2 (TLR2) Cascade	1	110	0	269	0.00909091	0.48465	0.48465	1	66	0.00680904	48887	Homo sapiens	SAA1				R-HSA-168166
R-HSA-5693567	HDR through Homologous Recombination (HR) or Single Strand Annealing (SSA)	1	124	0	260	0.0102479	0.492672	0.492672	1	42	0.00433302	48887	Homo sapiens	ABL1				R-HSA-5686587
R-HSA-5687128	MAPK6/MAPK4 signaling	1	105	0	265	0.00867769	0.496638	0.496638	1	40	0.00412669	48887	Homo sapiens	PSMA2				R-HSA-5687112
R-HSA-5693538	Homology Directed Repair	1	130	0	262	0.0107438	0.496638	0.496638	1	50	0.00515836	48887	Homo sapiens	ABL1				R-HSA-5686587
R-HSA-195253	Degradation of beta-catenin by the destruction complex	1	89	0	274	0.00735537	0.497625	0.497625	1	20	0.00206334	48887	Homo sapiens	PSMA2				R-HSA-2130282
R-HSA-69620	Cell Cycle Checkpoints	1	188	0	210	0.0155372	0.501553	0.501553	3	58	0.0059837	48887	Homo sapiens	PSMA2				R-HSA-69600;R-HSA-8852354;R-HSA-264458
R-HSA-1500620	Meiosis	0	94	1	286	0.0077686	0.502531	0.502531	2	14	0.00144434	48887	Homo sapiens			ABL1	O43196	R-HSA-912429;R-HSA-912496
R-HSA-2029480	Fcgamma receptor (FCGR) dependent phagocytosis	1	260	1	133	0.0214876	0.515071	0.515071	2	42	0.00433302	48887	Homo sapiens	ABL1	P00519	RET	P19174	R-HSA-2130194;R-HSA-167686
R-HSA-1168372	Downstream signaling events of B Cell Receptor (BCR)	1	220	0	182	0.0181818	0.518867	0.518867	1	43	0.00443619	48887	Homo sapiens	PSMA2				R-HSA-1168640
R-HSA-69275	G2/M Transition	1	199	0	205	0.0164463	0.519812	0.519812	1	76	0.00784071	48887	Homo sapiens	PSMA2				R-HSA-8852354
R-HSA-937061	TRIF-mediated TLR3/TLR4 signaling	1	108	0	316	0.00892562	0.520755	0.520755	1	57	0.00588053	48887	Homo sapiens	SAA1				R-HSA-168166
R-HSA-166166	MyD88-independent TLR3/TLR4 cascade	1	108	0	316	0.00892562	0.520755	0.520755	1	60	0.00619003	48887	Homo sapiens	SAA1				R-HSA-168166
R-HSA-453274	Mitotic G2-G2/M phases	1	201	0	205	0.0166116	0.521696	0.521696	1	78	0.00804704	48887	Homo sapiens	PSMA2				R-HSA-8852354
R-HSA-168164	Toll Like Receptor 3 (TLR3) Cascade	1	108	0	319	0.00892562	0.523573	0.523573	1	61	0.0062932	48887	Homo sapiens	SAA1				R-HSA-168166
R-HSA-453279	Mitotic G1-G1/S phases	1	143	0	293	0.0118182	0.529161	0.529161	1	55	0.0056742	48887	Homo sapiens	PSMA2				R-HSA-187574
R-HSA-2262752	Cellular responses to stress	2	470	1	554	0.038843	0.545213	0.545213	3	205	0.0211493	48887	Homo sapiens	IGFBP7	Q16270;ENSG00000163453	CBX5	Q09028	R-HSA-3797196;R-HSA-3797202;R-HSA-3240957
R-HSA-450531	Regulation of mRNA stability by proteins that bind AU-rich elements	1	91	1	340	0.00752066	0.554412	0.554412	5	26	0.00268235	48887	Homo sapiens	PSMA2	P25787	ABL1	P31946;P63104	R-HSA-450406;R-HSA-482788;R-HSA-450466;R-HSA-450620;R-HSA-450394
R-HSA-212165	Epigenetic regulation of gene expression	0	140	1	321	0.0115702	0.558781	0.558781	2	34	0.00350769	48887	Homo sapiens			CBX5	O43463;Q13185	R-HSA-427383;R-HSA-427528
R-HSA-1266738	Developmental Biology	4	931	3	1280	0.0769421	0.561844	0.561844	40	438	0.0451872	48887	Homo sapiens	RET;PSMA2;ABL1;IL17RD	P00519;P07949;Q8NFM7;P25787	RET;CSF3R;ABL1	P40763;Q4KMG0;P19174;P00533	R-HSA-8854981;R-HSA-8855747;R-HSA-8853762;R-HSA-8855617;R-HSA-376141;R-HSA-8853774;R-HSA-445069;R-HSA-8855564;R-HSA-428885;R-HSA-5674373;R-HSA-8855508;R-HSA-5672965;R-HSA-593690;R-HSA-428883;R-HSA-8853789;R-HSA-428888;R-HSA-8853734;R-HSA-452515;R-HSA-8853793;R-HSA-375138;R-HSA-8853792;R-HSA-5674366;R-HSA-5658430;R-HSA-8855915;R-HSA-8853801;R-HSA-8853737;R-HSA-8853800;R-HSA-448951;R-HSA-8854899;R-…
R-HSA-201722	Formation of the beta-catenin:TCF transactivating complex	0	66	2	381	0.00545455	0.56397	0.56397	2	13	0.00134117	48887	Homo sapiens			CBX5;ABL1	P35222;P51532	R-HSA-3299569;R-HSA-3322422
R-HSA-166054	Activated TLR4 signalling	1	128	0	351	0.0105785	0.564829	0.564829	1	85	0.00876921	48887	Homo sapiens	SAA1				R-HSA-168166
[truncated: 259 more rows]

## Sheet: Group 5
Higher in 18 months as compared to 24 months		Group 5
[truncated: 147 more rows]

## Sheet: Group 6
Higher in 24 months as compared to 18 months		Group 6
[truncated: 121 more rows]

[truncated: 3 more sheets: HowTo, Making_Same_Format_PiCrust, ReorganizedIntoCategories]
