# Supplementary material for: Aging and sarcopenia associate with specific interactions between gut microbes, serum biomarkers and host physiology in rats
Source: Aging (Albany NY). 2017 Jul 17;9(7):1698–714. doi: 10.18632/aging.101262 (PMC5559170; doi:10.18632/aging.101262)
Supplement: Supplementary file 6 [file aging-09-1698-s006.xlsx]

## Sheet: Data_Selected_For_Analysis
			1	2	3	4	5	6	7	8	9	10	11	12	13	14	15	16	17	18	19	20	21	22	23	24	25	26	27	28	29	30	31	32	33	34	35	36	37	38	39	40	41	42	43	44	45	46	47
SampleType_multC	Group_multC	FileName	Lipid_1	Lipid_2	Lipid_3	Lipid_4	Lipid_5	Lipid_6	Lipid_7	Lipid_8	Lipid_9	Lipid_10	Lipid_11	Lipid_12	Lipid_13	Lipid_14	Lipid_15	Lipid_16	Lipid_17	Lipid_18	Lipid_19	Lipid_20	Lipid_21	Lipid_22	Lipid_23	Lipid_24	Lipid_25	Lipid_26	Lipid_27	Lipid_28	Lipid_29	Lipid_30	Lipid_31	Lipid_32	Lipid_33	Lipid_34	Lipid_35	Lipid_36	Lipid_37	Lipid_38	Lipid_39	Lipid_40	Lipid_41	Lipid_42	Lipid_43	Lipid_44	Lipid_45	Lipid_46	Lipid_47
SA	8 months	intensity.20150522_dund100743_serum_1_s1_serum01	0.068306	0.0805082	0.0142636	0.391907	0.371785	0.161148	7.60505	0.130012	0.0994556	0.420541	0.0643828	4.03236	1.1625	3.76754	0.215151	0.0896571	0.0505438	2.2366	0.1134	0.0695134	0.0669383	0.0294448	0.29444	0.0359257	0.0501585	0.014581	0.256451	0.115774	0.684422	7.799	1.39038	0.340378	0.678882	1.62702	0.181588	0.242965	0.113063	0.0450134	0.253288	0.0837995	0.0181744	0.0191228	0.00814062	0.13204	0.4056	0.0401318	0.0353301
SA	8 months	intensity.20150522_dund100743_serum_1_s6_serum02	0.0658578	0.0667124	0.00664986	0.27112	0.362883	0.104397	5.53179	0.0692838	0.0612548	0.32161	0.0434701	2.76535	0.797475	2.74586	0.149367	0.0650645	0.0317259	1.87823	0.0787933	0.0553285	0.0617851	0.0324858	0.26827	0.0770341	0.0458557	0.0160359	0.454119	0.094894	0.561343	4.04636	0.750917	0.163657	0.336939	1.30026	0.131492	0.257342	0.0799324	0.042266	0.188968	0.0671095	0.00701972	0.0164528	0.0108206	0.117374	0.21097	0.0353109	0.0203643
SA	8 months	intensity.20150522_dund100743_serum_1_s11_serum03	0.00887908	0.0496945	0.0102614	0.259204	0.118938	0.106248	5.45686	0.110931	0.0470214	0.290709	0.0483554	3.98034	0.941549	2.46459	0.0755138	0.0621905	0.0411854	2.21182	0.130252	0.0511489	0.0577768	0.031271	0.276952	0.0916446	0.0177838	0.0155164	0.0716416	0.0464247	0.379337	0.598989	0.665038	0.308129	0.585671	0.712238	0.115354	0.236849	0.0704204	0.0311884	0.132396	0.0527562	0.0152752	0.0135555	0.0110511	0.116339	0.0114184	0.0140757	0.00300059
SA	8 months	intensity.20150522_dund100743_serum_1_s16_serum04	0.0224052	0.0726953	0.0139269	0.304466	0.153587	0.256849	6.7347	0.11863	0.0802746	0.300972	0.0793787	4.72038	1.52875	3.00607	0.116566	0.04913	0.0386561	3.61966	0.0833158	0.0541307	0.044145	0.0219	0.597265	0.18088	0.0172552	0.018493	0.200955	0.133146	0.599263	1.10795	0.808254	0.377019	1.19265	0.971561	0.131552	0.234538	0.08236	0.045486	0.161301	0.109865	0.0200224	0.0349674	0.0124854	0.110592	0.0302026	0.0236963	0.0138946
SA	8 months	intensity.20150522_dund100743_serum_1_s21_serum05	0.0423002	0.0433973	0	0.265849	0.298624	0.118999	5.49645	0.0775947	0.0693284	0.298986	0.032462	2.71053	0.859787	2.56676	0.0865183	0.0525067	0.0154655	1.99429	0.0845514	0.0544905	0.0521278	0.0206918	0.27858	0.0847012	0.0347874	0.0243824	0.397976	0.106218	0.82393	1.50023	1.12021	0.433127	1.38319	1.49278	0.115635	0.214851	0.0549452	0.0355739	0.144577	0.0538378	0.0104611	0.0225074	0.0146563	0.161923	0.0359426	0.02382	0.0173853
SA	8 months	intensity.20150522_dund100743_serum_1_s26_serum06	0.0210099	0.0799699	0.0188167	0.300385	0.173922	0.147781	5.4284	0.112844	0.0669478	0.373925	0.0477683	3.76743	0.974331	2.6373	0.0988053	0.060379	0.0402575	2.56711	0.119017	0.0748835	0.0611372	0.0329631	0.278949	0.0929227	0.0279106	0.0156817	0.103973	0.0866984	0.47117	1.29669	0.621193	0.388413	0.99221	0.94642	0.13287	0.232243	0.11445	0.046525	0.171748	0.086915	0.018808	0.025502	0	0.117909	0.031144	0.0182536	0.00885917
SA	8 months	intensity.20150522_dund100743_serum_1_s30_serum07	0.0358452	0.0788661	0.022853	0.271589	0.255736	0.246568	5.89759	0.116894	0.076278	0.247019	0.0623023	3.9904	0.99678	2.17213	0.0814283	0.0494045	0.0754108	2.32733	0.140725	0.0329596	0.033963	0.0261571	0.322392	0.129588	0.0325026	0.0102572	0.121338	0.138205	0.556256	1.43353	0.813769	0.417768	1.25091	1.03919	0.180694	0.221521	0.105247	0.0536859	0.195097	0.0770078	0.0195414	0.0215096	0.00540853	0.133813	0.0286156	0.0217937	0.0153918
SA	8 months	intensity.20150522_dund100743_serum_1_s35_serum08	0.0430471	0.0902457	0.0270403	0.307415	0.217521	0.35466	6.0264	0.139207	0.081926	0.255061	0.0758852	4.02537	1.11687	2.48875	0.0651655	0.0500701	0.110541	1.52084	0.172379	0.0346632	0.0662681	0.0260943	0.184609	0.095463	0.0331547	0.0200128	0.193671	0.219988	0.72939	0.932762	1.72358	0.61255	1.51885	1.51916	0.183112	0.227573	0.116063	0.0535711	0.20239	0.0638965	0.0148025	0.012488	0.0106657	0.145466	0.0240031	0.0212093	0.0110197
SA	8 months	intensity.20150522_dund100743_serum_1_s39_serum09	0.0308836	0.0466192	0.0070778	0.155943	0.214224	0.156701	2.90541	0.0646537	0.0640048	0.17104	0.0276035	1.78147	0.647745	1.55749	0.0661341	0.0294921	0.0361261	1.19801	0.0982251	0.0226742	0.0321081	0.00831212	0.191673	0.0686035	0.0235578	0.0129298	0	0	0.243483	0.426059	0.332017	0.26457	0.364722	0.550552	0.0874458	0.224128	0.044301	0.0299334	0.10851	0.0418697	0	0.0107847	0	0.124549	0.0124884	0.0181555	0.00989933
SA	8 months	intensity.20150522_dund100743_serum_1_s44_serum10	0.0271855	0.084751	0.0211426	0.325281	0.203339	0.167931	5.98084	0.116254	0.0792584	0.315994	0.0517842	4.1414	1.03295	2.43416	0.111253	0.0526693	0.0449401	3.08042	0.125931	0.0705817	0.0513473	0.0257795	0.419744	0.118416	0.00643505	0.0116377	0.143427	0.124058	0.682666	1.41197	0.91381	0.364965	0.909704	1.19431	0.142444	0.229395	0.109304	0.040617	0.157416	0.110648	0.0191898	0.0252101	0.00533224	0.150592	0.0447907	0.0161693	0.00812029
SA	18 months	intensity.20150522_dund100743_serum_1_s2_serum11	0.0340982	0.0685048	0.0199947	0.281224	0.0863833	0.186574	6.34702	0.1197	0.090812	0.280269	0.0718305	3.89384	0.96846	2.72146	0.228506	0.0472536	0.0740896	2.22643	0.122777	0.0491169	0.0355581	0.0125769	0.373057	0.114946	0	0	0.187143	0.221639	0.454992	6.98561	0.716569	0.410705	0.539571	0.619514	0.173173	0.245825	0.11086	0.042615	0.191563	0.0936713	0.0210417	0.0323281	0	0.127727	0.365067	0.0176522	0.0160997
SA	18 months	intensity.20150522_dund100743_serum_1_s7_serum12	0.0797275	0.0834146	0.0138778	0.307061	0.305798	0.15992	6.17204	0.124277	0.0833345	0.320056	0.0579759	4.55742	1.0865	2.49333	0.183355	0.0607892	0.0559772	2.08223	0.145728	0.0565858	0.0855156	0.0294203	0.301431	0.126769	0.0372303	0.0157507	0.28207	0.193253	0.611589	8.38283	1.72823	0.456023	0.874726	1.63554	0.16717	0.25061	0.12265	0.0633294	0.207058	0.0814606	0.0188419	0.0207372	0.0102984	0.11495	0.285342	0.0282286	0.0127053
SA	18 months	intensity.20150522_dund100743_serum_1_s12_serum13	0.037771	0.0689741	0.0155381	0.288152	0.23032	0.141679	5.58143	0.101899	0.0556706	0.292581	0.0486895	3.89485	1.03492	2.46313	0.0812522	0.057163	0.0547101	2.28802	0.129307	0.0405993	0.0946359	0.0227379	0.359449	0.11145	0.0254682	0.0217655	0	0.100012	0.5135	0.447923	0.84059	0.373048	0.746215	0.995879	0.137096	0.229674	0.0679955	0.0437323	0.157467	0.0586643	0.0158925	0.0188948	0.00908509	0.118623	0.00903161	0.0201644	0.00809992
SA	18 months	intensity.20150522_dund100743_serum_1_s17_serum14	0.0503144	0.053992	0.00913849	0.261402	0.293298	0.147976	5.88593	0.119735	0.0696232	0.314558	0.0550619	4.12935	1.07945	3.29611	0.0984853	0.0580997	0.0458951	2.48076	0.106024	0.0506591	0.0423453	0.0203177	0.386003	0.0878618	0.0234588	0.0117582	0.41356	0.192671	0.778701	1.68763	0.98931	0.388991	1.77557	1.37922	0.160611	0.244304	0.117917	0.0518814	0.214709	0.0937739	0.0244963	0.0307175	0.00722634	0.140227	0.0481052	0.0309045	0.0242191
SA	18 months	intensity.20150522_dund100743_serum_1_s22_serum15	0.0147617	0.0349504	0.00681924	0.176265	0.092217	0.0831969	3.57751	0.0607339	0.0485096	0.228055	0.0274634	2.06438	0.562341	1.94016	0.0611229	0.0508186	0.0263157	1.30801	0.0540352	0.0348482	0.0386213	0.0183721	0.166763	0.0415719	0	0.00684576	0.101224	0.0636227	0.412879	1.37768	0.461348	0.348738	0.98016	0.502734	0.0771806	0.226617	0.051252	0.0229218	0.101416	0.0423415	0.00638356	0.00945835	0	0.11053	0.0246054	0.011891	0.0069613
SA	18 months	intensity.20150522_dund100743_serum_1_s27_serum16	0.0437518	0.0850027	0.0191139	0.349254	0.248872	0.22099	6.75565	0.132174	0.0841083	0.370637	0.0570818	4.37919	1.25865	3.35703	0.0965334	0.0827909	0.0757654	2.63431	0.158284	0.0558401	0.0762728	0.0312561	0.338271	0.142737	0.0352883	0.0227018	0.132597	0.0731169	0.426647	0.824114	0.917688	0.305724	0.639798	0.911034	0.146847	0.236648	0.101	0.0466643	0.176696	0.0848093	0.0138203	0.0206012	0.0130384	0.122911	0.0130322	0.0228701	0.0112577
SA	18 months	intensity.20150522_dund100743_serum_1_s31_serum17	0.041287	0.0673989	0.0170233	0.250614	0.258626	0.160838	5.3555	0.0919238	0.0670349	0.261585	0.0619432	3.54486	0.828809	2.5199	0.0696391	0.0498375	0.0764929	1.77234	0.0904846	0.0246899	0.0383953	0.0216879	0.267317	0.0931722	0.0295072	0.0157322	0.118919	0.113363	0.431964	1.10766	0.840204	0.342946	1.20685	0.927319	0.155643	0.231937	0.0991111	0.0460962	0.182451	0.0652523	0.0179579	0.0205121	0.00436763	0.129793	0.0286137	0.025444	0.0158371
SA	18 months	intensity.20150522_dund100743_serum_1_s36_serum18	0.0438205	0.210397	0.0508159	0.690556	0.309163	0.806541	12.226	0.344667	0.205037	0.510728	0.168675	8.81434	2.96484	4.90712	0.260684	0.101389	0.223998	6.00208	0.292121	0.0584178	0.0813602	0.0506246	0.986533	0.368537	0.0273536	0.0392167	0.0764515	0.148671	1.08517	1.21393	1.58504	0.480111	1.2144	1.46723	0.256875	0.232706	0.163621	0.0956558	0.258193	0.202158	0.025605	0.0650557	0.00786727	0.126965	0.0320539	0.0267509	0.0074436
SA	18 months	intensity.20150522_dund100743_serum_1_s40_serum19	0.0323132	0.0741303	0.0107006	0.294759	0.19523	0.18193	6.09645	0.100906	0.0823834	0.301541	0.0472337	3.29126	1.0154	2.96987	0.0790946	0.052444	0.0402689	2.03119	0.136777	0.0466795	0.0609027	0.0236611	0.367868	0.152336	0.0302703	0.0235002	0.231324	0.108018	0.503625	1.00887	0.909077	0.33807	0.893425	0.982054	0.148738	0.232516	0.0868305	0.0407379	0.176353	0.0749005	0.0113479	0.0273094	0.00940751	0.133367	0.021602	0.0234442	0.011881
SA	18 months	intensity.20150522_dund100743_serum_1_s45_serum20	0.0317544	0.0752016	0.0202006	0.351512	0.234805	0.194415	6.67908	0.10914	0.0991734	0.389704	0.0528305	3.53336	1.20451	3.51761	0.10718	0.0816005	0.0504058	2.97089	0.101622	0.0497622	0.0599987	0.0372979	0.563124	0.139399	0.0289855	0.0254331	0.167193	0.0705047	0.538914	1.04513	0.816585	0.319194	1.11889	1.05559	0.144696	0.228813	0.0747543	0.0444441	0.170679	0.0758114	0.0114073	0.0279081	0.0119305	0.125295	0.0252499	0.0267258	0.0149455
SA	24 months	intensity.20150522_dund100743_serum_1_s5_serum41	0.0380072	0.0345554	0	0.277105	0.239413	0.125724	6.57471	0.0783625	0.0589729	0.350875	0.029104	2.95066	1.24	3.65211	0.0831852	0.070508	0.00913892	2.53297	0.0353097	0.0414794	0.0854745	0.0164888	0.378682	0.070267	0.0308042	0.0365707	0.0533106	0	0.568571	0.538702	0.722696	0.355889	0.585344	1.11233	0.141171	0.207018	0.0614438	0.0464031	0.17838	0.0735708	0.00694394	0.0297643	0.0136752	0.13116	0.0243195	0.0260758	0.0125468
SA	24 months	intensity.20150522_dund100743_serum_1_s10_serum42	0.0254824	0.0186516	0	0.231556	0.194258	0.0912438	5.693	0.0650288	0.0559336	0.402848	0.0322024	2.56825	0.822607	5.14817	0.0786235	0.0892209	0	2.05891	0.0143004	0.024338	0.0549639	0.0144895	0.408837	0.025677	0.0268671	0.02142	0.320436	0.135708	0.737586	1.37309	0.373567	0.274733	0.710066	0.554314	0.20872	0.224121	0.078017	0.0449487	0.278125	0.0999306	0.0124539	0.0505177	0.0125218	0.142554	0.0427436	0.0363301	0.00996796
SA	24 months	intensity.20150522_dund100743_serum_1_s15_serum43	0.0539999	0.059346	0.0103539	0.272696	0.2502	0.141803	6.35141	0.106559	0.0562139	0.316592	0.0581566	4.17222	1.0389	2.71298	0.0783991	0.0572481	0.0378227	2.74296	0.0728759	0.0393296	0.0561646	0.02086	0.352808	0.0900859	0.00983336	0.0156531	0.100263	0.192501	0.567589	1.90973	0.979483	0.460084	1.34758	1.36089	0.142423	0.235553	0.110044	0.0411188	0.155691	0.0878472	0.0159201	0.0287725	0.0062999	0.141554	0.0441218	0.0142171	0.00552072
SA	24 months	intensity.20150522_dund100743_serum_1_s20_serum44	0.0355045	0.054119	0.0137013	0.335681	0.245222	0.141892	5.35045	0.143619	0.066252	0.329262	0.0573168	3.63516	1.06302	2.1719	0.114669	0.0563234	0.0263405	2.63256	0.0861918	0.0539149	0.0779237	0.030773	0.320767	0.0844026	0.0409813	0.0206838	0.205579	0.0886792	0.597027	0.998061	0.862678	0.378617	0.710538	1.14003	0.137026	0.220979	0.11934	0.0634347	0.158952	0.112251	0.0166999	0.0343671	0.0146446	0.138362	0.0279077	0.0319427	0.0169522
SA	24 months	intensity.20150522_dund100743_serum_1_s25_serum45	0.0170234	0.0524363	0.00801459	0.27976	0.131332	0.129755	5.82419	0.0948272	0.0648306	0.302494	0.0470862	3.46135	0.94009	2.72874	0.0927328	0.0515156	0.0220555	2.43358	0.0618813	0.0555841	0.0466265	0.0266524	0.351801	0.0855205	0.0181674	0.0210373	0.263738	0.126399	0.635861	1.63481	0.718249	0.382026	1.56912	1.03292	0.141691	0.223928	0.0793503	0.0365247	0.169992	0.0696668	0.0165318	0.023995	0.00601855	0.130363	0.0514583	0.0255103	0.00914079
SA	24 months	intensity.20150522_dund100743_serum_1_s34_serum47	0.0151439	0.07704	0.0145999	0.290861	0.107391	0.168034	5.46598	0.111386	0.0648098	0.297364	0.0511376	3.57215	1.02001	2.38862	0.0967632	0.0517231	0.0343036	2.62473	0.086642	0.0461295	0.0706204	0.0254903	0.470903	0.109155	0.0185139	0.0208318	0.290387	0.118484	0.789437	0.881292	1.1944	0.358663	0.911868	1.49515	0.132597	0.219547	0.083176	0.0435821	0.154539	0.0744718	0.0146782	0.0327452	0.0166163	0.155083	0.0298692	0.0184419	0.00844638
SA	24 months	intensity.20150522_dund100743_serum_1_s43_serum49	0.0391634	0.0677664	0.0114804	0.340848	0.261027	0.188672	6.87737	0.081738	0.0801168	0.382454	0.0557428	3.14817	1.30725	3.36932	0.0974056	0.0732975	0.0270876	2.93448	0.0434113	0.043518	0.0489489	0.0301861	0.4531	0.066902	0.0321705	0.0245715	0.500152	0.222544	0.910014	1.3111	0.866918	0.481483	1.49328	1.54638	0.193141	0.224847	0.0798952	0.0715965	0.234094	0.0918458	0.0205828	0.0412559	0.0116617	0.170871	0.0664933	0.0489127	0.0332474
SA	24 months	intensity.20150522_dund100743_serum_1_s48_serum50	0.0279916	0.0657662	0.0132583	0.320304	0.167295	0.171913	5.9217	0.0973714	0.0884005	0.394059	0.0547599	3.21916	1.04917	3.50676	0.100006	0.0764809	0.0370571	2.26837	0.0557817	0.0533708	0.0774455	0.0344596	0.272588	0.0722234	0.0294925	0.0265917	0.203904	0.076608	0.381674	1.16888	0.535959	0.340614	0.542821	0.73128	0.105448	0.227399	0.0848166	0.0381181	0.15325	0.079361	0.0123836	0.0222066	0.0100831	0.13137	0.0332279	0.0200639	0.00946597
[truncated: 95 more columns]

## Sheet: OnlyStatDiff
SampleType_multC	Group_multC	FileName	Lipid_17	Lipid_19	Lipid_44	Lipid_63	Lipid_89
SA	8 months	intensity.20150522_dund100743_serum_1_s1_serum01	0.0505438	0.1134	0.13204	0.492487	27.7176						Comp 8-18	Comp 8-24	Comp 18-24	Annotation
SA	8 months	intensity.20150522_dund100743_serum_1_s6_serum02	0.0317259	0.0787933	0.117374	0.266801	15.9302					Lipid_17	NS	NS	Higher 18	LPC 20:5
SA	8 months	intensity.20150522_dund100743_serum_1_s11_serum03	0.0411854	0.130252	0.116339	0.34794	13.9019					Lipid_19	NS	NS	Higher 18	LPC 20:3
SA	8 months	intensity.20150522_dund100743_serum_1_s16_serum04	0.0386561	0.0833158	0.110592	0.479314	23.4796					Lipid_44	NS	NS	Higher 24	LPI 16:0
SA	8 months	intensity.20150522_dund100743_serum_1_s21_serum05	0.0154655	0.0845514	0.161923	0.58261	22.9534					Lipid_63	NS	NS	Higher 24	PC 37:4
SA	8 months	intensity.20150522_dund100743_serum_1_s26_serum06	0.0402575	0.119017	0.117909	0.495427	16.0411					Lipid_89	NS	NS	Higher 24	SE 20:4
SA	8 months	intensity.20150522_dund100743_serum_1_s30_serum07	0.0754108	0.140725	0.133813	0.284066	15.1625
SA	8 months	intensity.20150522_dund100743_serum_1_s35_serum08	0.110541	0.172379	0.145466	0.261822	13.2273
SA	8 months	intensity.20150522_dund100743_serum_1_s39_serum09	0.0361261	0.0982251	0.124549	0.183156	7.93384
SA	8 months	intensity.20150522_dund100743_serum_1_s44_serum10	0.0449401	0.125931	0.150592	0.450907	15.3212
SA	18 months	intensity.20150522_dund100743_serum_1_s2_serum11	0.0740896	0.122777	0.127727	0.397392	18.2364
SA	18 months	intensity.20150522_dund100743_serum_1_s7_serum12	0.0559772	0.145728	0.11495	0.277782	14.3651
SA	18 months	intensity.20150522_dund100743_serum_1_s12_serum13	0.0547101	0.129307	0.118623	0.37538	17.8086
SA	18 months	intensity.20150522_dund100743_serum_1_s17_serum14	0.0458951	0.106024	0.140227	0.544894	21.4792
SA	18 months	intensity.20150522_dund100743_serum_1_s22_serum15	0.0263157	0.0540352	0.11053	0.273918	10.6329
SA	18 months	intensity.20150522_dund100743_serum_1_s27_serum16	0.0757654	0.158284	0.122911	0.396934	16.3829
SA	18 months	intensity.20150522_dund100743_serum_1_s31_serum17	0.0764929	0.0904846	0.129793	0.297534	18.6091
SA	18 months	intensity.20150522_dund100743_serum_1_s36_serum18	0.223998	0.292121	0.126965	0.829475	33.4802
SA	18 months	intensity.20150522_dund100743_serum_1_s40_serum19	0.0402689	0.136777	0.133367	0.305482	17.0447
SA	18 months	intensity.20150522_dund100743_serum_1_s45_serum20	0.0504058	0.101622	0.125295	0.421771	19.3981
SA	24 months	intensity.20150522_dund100743_serum_1_s5_serum41	0.00913892	0.0353097	0.13116	0.780835	38.6373
SA	24 months	intensity.20150522_dund100743_serum_1_s10_serum42	0	0.0143004	0.142554	0.781062	32.8527
SA	24 months	intensity.20150522_dund100743_serum_1_s15_serum43	0.0378227	0.0728759	0.141554	0.465137	26.7887
SA	24 months	intensity.20150522_dund100743_serum_1_s20_serum44	0.0263405	0.0861918	0.138362	0.554908	21.2595
SA	24 months	intensity.20150522_dund100743_serum_1_s25_serum45	0.0220555	0.0618813	0.130363	0.563726	25.4032
SA	24 months	intensity.20150522_dund100743_serum_1_s34_serum47	0.0343036	0.086642	0.155083	0.537867	22.0365
SA	24 months	intensity.20150522_dund100743_serum_1_s43_serum49	0.0270876	0.0434113	0.170871	1.06002	42.7602
SA	24 months	intensity.20150522_dund100743_serum_1_s48_serum50	0.0370571	0.0557817	0.13137	0.443203	20.252
		Mean 8	0.0484853	0.114659	0.13106	0.384453	17.1669
		Mean 18	0.0723919	0.133716	0.125039	0.412056	18.7437
		Mean 24	0.026381	0.0570493	0.142665	0.648344	28.7488
		Ratio 18/24	2.74409	2.34387	0.876452	0.635552	0.651984

## Sheet: Lipid_All_Sig_Proteins_Correlat
Shaded columns indicate significantly altered lipids
	Lipid_1	Lipid_2	Lipid_3	Lipid_4	Lipid_5	Lipid_6	Lipid_7	Lipid_8	Lipid_9	Lipid_10	Lipid_11	Lipid_12	Lipid_13	Lipid_14	Lipid_15	Lipid_16	Lipid_17	Lipid_18	Lipid_19	Lipid_20	Lipid_21	Lipid_22	Lipid_23	Lipid_24	Lipid_25	Lipid_26	Lipid_27	Lipid_28	Lipid_29	Lipid_30	Lipid_31	Lipid_32	Lipid_33	Lipid_34	Lipid_35	Lipid_36	Lipid_37	Lipid_38	Lipid_39	Lipid_40	Lipid_41	Lipid_42	Lipid_43	Lipid_44	Lipid_45	Lipid_46	Lipid_47	Lipid_48	Lipid_49
MIA	0	0	0	0	0	0	0	0	0	0	0	0	0	0	0	0	0	0	0	0	0	0	0	0	0	0	0	0	0	0	0	0	0	0	0	0	0	0	0	0	0	0	0	0	0	0	0	0	0
CSF3R	0	0	0	0	0	0	0	0	0	0	0	0	0	0	0	0	0	0	0	0	0	0	0	0	0	0	0	0	0	0	0	0	0	0	0	0	0	0	0	0	0	0	0	0	0	0	0	0	0
SIGLEC6	0	0	0	0	0	0	0	0	0	0	0	0	0	0	0	0	0	0	0	0	0	0	0	0	0	0	0	0	0	0	0	0	0	0	0	-0.644078	0	0	0	0	0	0	0	0	0	0	0	0	0
GDF11	0	0	0	0	0	0	0	0	0	0	0	0	0	0	0	0	0	0	0.598291	0	0	0	0	0	0	0	0	0	0	0	0	0	0	0	0	0	0	0	0	0	0	0	0	0	0	0	0	0	0
MMP3	0	0	0	0	0	0	0	0	0	0	0	0	0	0	0	0	0	0	0	0	0	0	0	0	0	0	0	0	0	0	0	0	0	0	0	0	0	0	0	0	0	0	0	0	0	0	0	0	0
COMMD7	0	0	0	0	0	0	0	0	0	0	0	0	0	0	0	0	0	0	0	0	0	0	0	0	0	0	0	0	0	0	0	0	0	0	0	0	0	0	0	0	0	0	0	0	0	0	0	0	0
WIF1	0	0	0	0	0	0	0	0	0	0	0	0	0	0	0	0	0	0	0	0	0	0	0	0	0	0	0	0	0	0	0	0	0	0	0	0	0	0	0	0	0	0	0	0	0	0	0	0	0
C5	0	0	0	0	0	0	0	0	0	0	0	0	0	0	0	0	0	0	0	0	0	0	0	0	0	0	0	0	0	0	0	0	0	0	0	0	0	0	0	0	0	0	0	0	0	0	0	0	0
KPNA2	0	0	0	0	0	0	0	0	0	0	0	0	0	0	0	0	0	0	0	0	0	0	0	0	0	0	0	0	0	0	0	0	0	0	0	0	0	0	0	0	0	0	0	0	0	0	0	0	0
TNFSF11	-0.141636	-0.441392	-0.428222	-0.119658	0	-0.208791	0	-0.581197	-0.180708	0.233211	-0.457875	-0.523199	-0.0421245	0.277167	-0.340049	0.163004	-0.539072	0.134921	-0.576313	-0.264347	-0.045177	-0.148962	0.211844	-0.260073	-0.0369409	0.581197	0.153236	-0.169719	0.147741	-0.126984	-0.115385	-0.0311355	0.342491	-0.030525	-0.114774	-0.58486	-0.491453	-0.188034	-0.213675	-0.136142	-0.394994	0.302808	0.261454	0.344933	-0.0811966	0.15873	-0.0409035	0.160562	0.138584
TNFSF15	0	0	0	0	0	0	0	0	0	0	0	0	0	0	0	0	0	0	0	0	0	0	0	0	0	0	0	0	0	0	0	0	0	0	0	0	0	0	0	0	0	0	0	0	0	0	0	0	0
CNTN1	0	0	0	0	0	0	0	0	0	0	0	0	0	0	0	0	0	0	0	0	0	0	0	0	0	0	0	0	0	0	0	0	0	0	0	0	0	0	0	0	0	0	0	0	0	0	0	0	0
IL1B	0	0	0	0	0	0	0	0	0	0	0	0	0	0	0	0	0	0	0	0	0	0	0	0	0	0	0	0	0	0	0	0	0	0	0	0	0	0	0	0	0	0	0	0	0	0	0	0	0
WISP1	0	0	0	0	0	0	0	0	0	0	0	0	0	0	0	0	0	0	0	0	0	0	0	0	0	0	0	0	0	0	0	0	0	0	0	0	0	0	0	0	0	0	0	0	0	0	0	0	0
IL18BP	0	0	0	0	0	0	0	0	0	0	0	0	0	0	0	0	0	0	0	0	0	0	0	0	0	0	0	0	0	0	0	0	0	0	0	0	0	0	0	0	0	0	0	0	0	0	0	0	0
EDA2R	0	0	0	0	0	0	0	0	0	0	0	0	0	0	0	0	0	0	0	0	0	0	0	0	0	0	0	0	0	0	0	0	0	0	0	0	0	0	0	0	0	0	0	0	0	0	0	0	0
HAPLN1	0	0	0	0	0	0	0	0	0	0	0	0	0	0	0	0	0	0	0	0	0	0	0	0	0	0	0	0	0	0	0	0	0	0	0	0	0	0	0	0	0	0	0	0	0	0	0	0	0
ASAH2	0	0	0	0	0	0	0	0	0	0	0	0	0	0	0	0	0	0	0	0	0	0	0	0	0	0	0	0	0	0	0	0	0	0	0	0	0	0	0	0	0	0	0	0	0	0	0	0	0
RET	0	0	0	0	0	0	0	0	0	0	0	0	0	0	0	0	0	0	0	0	0	0	0	0	0	0	0	0	0	0	0	0	0	0	0	0	0	0	0	0	0	0	0	0	0	0	0	0	0
CD48	0	0	0	0	0	0	0	0	0	0	0	0	0	0	0	0	0	0	0	0	0	0	0	0	0	0	0	0	0	0	0	0	0	0	0	0	0	0	0	0	0	0	0	0	0	0	0	0	0
IGFBP7	0	0	0	0	0	0	0	-0.540293	0	0	0	0	0	0	0	0	0	0	0	0	0	0	0	0	0	0.556166	0	0	0	0	0	0	0	0	0	0	-0.595849	0	0	0	0	0	0	0	0	0	0	0	0
THBS4	0	0	0	0	0	0	0	0	0	0	0	0	0	0	0	0	0	0	0	0	0	0	0	0	0	0	0	0	0	0	0	0	0	0	0	0	0	0	0	0	0	0	0	0	0	0	0	0	0
ABL1	0	0	0	0	0	0	0	0	0	0	0	0	0	0	0	0	0	0	0	0	0	0	0	0	0	0	0	0	0	0	0	0	0	0	0	0	0	0	0	0	0	0	0	0	0	0	0	0	0
ACY1	0	0	0	0	0	0	0	0	0	0	0	0	0	0	0	0	0	0	0	0	0	0	0	0	0	0	0	0	0	0	0	0	0	0	0	0	0	0	0	0	0	0	0	0	0	0	0	0	0
IL17RD	0	-0.458015	-0.502597	0	0	0	0	-0.508702	0	0	-0.427176	-0.476947	0	0	0	0	-0.672061	0	-0.690992	0	0	0	0	0	0	0.505038	0	0	0	0	0	0	0	0	0	-0.552061	-0.467481	0	0	0	0	0	0	0	0	0	0	0	0
DKK1	0	0	0	0	0	0	0	0	0	0	0	0	0	0	0	0	0	0	0	0	0	0	0	0	0	0	0	0	0	0	0	0	0	0	0	0	0	0	0	0	0	0	0	0	0	0	0	0	0
PTH	0	0	0	0	0	0	0	0	0	0	0	0	0	0	0	0	0	0	0	0	0	0	0	0	0	0	0	0	0	0	0	0	0	0	0	0	0	0	0	0	0	0	0	0	0	0	0	0	0
CA9	0	0	0	0	0	0	0	0	0	0	0	0	0	0	0	0	0	0	0	0	0	0	0	0	0	0	0	0	0	0	0	0	0	0	0	0	0	0	0	0	0	0	0	0	0	0	0	0	0
DMP1	0	0	0	0	0	0	0	0	0	0	0	0	0	0	0	0	0	0	0	0	0	0	0	0	0	0	0	0	0	0	0	0	0	0	0	0	0	0	0	0	0	0	0	0	0	0	0	0	0
FGFR3	0	0	0	0	0	0	0	0	0	0	0	0	0	0	0	0	0	0	0	0	0	0	0	0	0	0	0	0	0	0	0	0	0	0	0	0	0	0	0	0	0	0	0	0	0	0	0	0	0
MATK	0	0	0	0	0	0	0	0	0	0	0	0	0	0	0	0	0	0	0	0	0	0	0	0	0	0	0	0	0	0	0	0	0	0	0	0	0	0	0	0	0	0	0	0	0	0	0	0	0
CFB	0	0	0	0	0	0	0	0	0	0	0	0	0	0	0	0	0	0	0	0	0	0	0	0	0	0	0	0	0	0	0	0	0	0	0	0	0	0	0	0	0	0	0	0	0	-0.584033	0	-0.550756	-0.607846
IGF1R	0	0	0.589493	0	0	0	0	0	0	0	0	0	0	0	0	0	0.586691	0	0.630037	0	0	0	0	0.571429	0	0	0	0	0	0	0	0	0	0	0	0	0	0	0	0	0	0	0	0	0	0	0	-0.549451	0
NME1	0	0	0	0	0	0	0	0	0	0	0	0	0	0	0	0	0	0	0	0	0	0	0	0	0	0	0	0	0	0	0	0	0	0	0	0	0	0	0	0	0	0	0	0	0	0	0	0	0
P4HB	0	0	0	0	0	0	0	0	0	0	0	0	0	0	0	0	0	0	0	0	0	0	0	0	0	0	0	0	0	0	0	0	0	0	0	0.652114	0	0	0	0	0	0	0	0	0	0	0	0	0
PSMA2	0	0	0	0	0	0	0	0	0	0	0	0	0	0	0	0	0	0	0	0	0	0	0	0	0	0	0	0	0	0	0	0	0	0	0	0	0	0	0	0	0	0	0	0	0	0	0	0	0
AMN	0	0	0	0	0	0	0	0	0	0	0	0	0	0	0	0	0	0	0	0	0	0	0	0	0	0	0	0	0	0	0	0	0	0	0	0	0	0	0	0	0	0	0	0	0	0	0	0	0
SAA1	0	0	0	0	0	0	0	0	0	0	0	0	0	0	0	0	0	0	0	0	0	0	0	0	0	0	0	0	0	0	0	0	0	0	0	0	0	0	0	0	0	0	0	0	0	0	0	0	0
CHST2	0	0	0	0	0	0	0	0	0	0	0	0	0	0	0	0	0	0	0	0	0	0	0	0	0	0	0	0	0	0	0	0	0	0	0	0	0	0	0	0	0	0	0	0	0	0	0	0	0
CBX5	0	-0.534657	0	0	0	0	0	-0.482443	0	0	0	0	0	0	0	0	-0.503206	0	-0.571298	0	0	0	0	0	0	0	0	0	0	0	0	0	0	0	0	-0.481221	-0.531908	0	-0.482443	0	-0.454657	0	0	0	0	0	0	0	0
CSN1S1	0	0	0	0	0	0	0	0	0	0	0	0	0	0	0	0	0	0	0	0	0	0	0	0	0	0	0	0	0	0	0	0	0	0	0	0	0	0	0	0	0	0	0	0	0	0	0	0	0
LTA	0	0	0	0	0	0	0	0	0	0	0	0	0	0	0	0	0	0	0	0	0	0	0	0	0	0	0	0	0	0	0	0	0	0	0	0	0	0	0	0	0	0	0	0	0	0	0	0	0
TXNDC12	0	0	0	0	0	0	0	0	0	0	0	0	0	0	0	0	0	0	0	0	0	0	0	0	0	0	0	0	0	0	0	0	0	0	0	0	0	0	0	0	0	0	0	0	0	0	0	0	0
EPHA2	0	0	0	0	0	0	0	0	0	0	0	0	0	0	0	0	0	0	0	0	0	0	0	0	0	0	0	0	0	0	0	0	0	0	0	0	0	0	0	0	0	0	0	0	0	0	0	0	0
VEGFA	0	0	0	0	0	0	0	0	0	0	0	0	0	0	0	0	0	0	0	0	0	0	0	0	0	0	0	0	0	0	0	0	0	0	0	0	0	0	0	0	0	0	0	0	0	0	0	0	0
HBA1 HBB	0	0	0	0	0	0	0	0	0	0	0	0	0	0	0	0	0	0	0	0	0	0	0	0	0	0	0	0	0	0	0	0	0	0	0	0	0	0	0	0	0	0	0	0	0	0	0	0	0
ERAP1	0	0	0	0	0	0	0	-0.505877	0	0	-0.461304	-0.511372	0	0	0	0	-0.59075	0	-0.556556	0	0	0	0	0	0	0.50374	0	0	0	0	0	0	0	0	0	-0.573348	-0.388032	0	0	0	0	0.433216	0	0	0	0	0	0	0
ATP5B	0	0	0	0	0	0	0	0	0	0	0	0	0	0	0	0	0	0	-0.45116	0	0	0	0	0	0	0.534799	0	0	0	0	0	0	0	0	0	-0.448718	0	0	0	0	0	0.571429	0.417227	0	0	0	0	0	0
HPGD	0	0	0	0	0	0	0	0	0	0	0	0	0	0	0	0	0	0	0	0	0	0	0	0	0	0	0	0	0	0	0	0	0	0	0	0	0	0	0	0	0	0	0	0	0	0	0	0	0
TNFRSF25	0	0	0	0	0	0	0	0	0	0	0	0	0	0	0	0	0	0	0	0	0	0	0	0	0	0	0	0	0	0	0	0	0	0	0	0	0	0	0	0	0	0	0	0	0	0	0	0	0
EPHA10	0	0	0.500993	0	0	0	0	0	0	0	0	0.463135	0	0	0	0	0.498855	0	0	0	0	0	0	0	0	0	0	0	0	0	0	0	0	0	0	0.545566	0	0	0	0	0	0	0	0	0	0	0	0	0
IL20RA	0	0	0	0	0	0	0	0	0	0	0	0	0	0	0	0	0	0	0	0	0	0	0	0	0	0	0	0	0	0	0	0	0	0	0	0	0	0	0	0	0	0	0	0	0	0	0	0	0
NOTCH1	0	0	0	0	0	0	0	0	0	0	0	0	0	0	0	0	0	0	0.535409	0	0	0	0	0	0	-0.553724	0	0	0	0	0	0	0	0	0	0	0	0	0	0	0	0	0	0	0	-0.586081	0	-0.528694	0
PDK1	0	0	0	0	0	0	0	0	0	0	0	0	0	0	0	0	0	0	0	0	0	0	0	0	0	0	0	0	0	0	0	0	0	0	0	0	0	0	0	0	0	0	0	0	0	0	0	0	0
NR1D1	0	0	0	0	0	0	0	0	0	0	0	0	0	0	0	0	0	0	0	0	0	0	0	0	0	0	0	0	0	0	0	0	0	0	0	0	0	0	0	0	0	0	0	0	0	0	0	0	0
ELANE	0	0	0	0	0	0	0	0	0	0	0	0	0	0	0	0	0	0	0	0	0	0	0	0	0	0	0	0	0	0	0	0	0	0	0	0	0	0	0	0	0	0	0	0	0	0	0	0	0
Only the part selected for plotting:															Order
		Lipid_17	Lipid_19	Lipid_44	Lipid_63	Lipid_89		Cate	Nam	Order			Lipid_89	SE 20:4	5
Cat 6	GDF11	0	0.598291	0	-0.529304	-0.59768		Cat 17	NOTCH1	10			Lipid_63	PC 37:4	4
Cat 8	IGF1R	0.586691	0.630037	0	0	0		Cat 17	EPHA10	9			Lipid_44	LPI 16:0	3
Cat 13	ATP5B	0	-0.45116	0	0.534188	0.633089		Cat 17	P4HB	8			Lipid_19	LPC 20:3	2
Cat 14	IL17RD	-0.672061	-0.690992	0	0.501374	0.51084		Cat 14	TNFSF11	7			Lipid_17	LPC 20:5	1
Cat 14	CBX5	-0.503206	-0.571298	0	0	0		Cat 14	ERAP1	6
Cat 14	ERAP1	-0.59075	-0.556556	0	0.562052	0.473821		Cat 14	CBX5	5
Cat 14	TNFSF11	-0.539072	-0.576313	0.344933	0.478632	0.527473		Cat 14	IL17RD	4
Cat 17	P4HB	0	0	0	-0.558999	0		Cat 13	ATP5B	3
Cat 17	EPHA10	0.498855	0	0	0	0		Cat 8	IGF1R	2
Cat 17	NOTCH1	0	0.535409	0	0	-0.540293		Cat 6	GDF11	1
		LPC 20:5	LPC 20:3	LPI 16:0	PC 37:4	SE 20:4
[truncated: 73 more columns]

## Sheet: Lipid_MetadataCorrelations
Shaded columns indicate significantly altered lipids
	Lipid_1	Lipid_2	Lipid_3	Lipid_4	Lipid_5	Lipid_6	Lipid_7	Lipid_8	Lipid_9	Lipid_10	Lipid_11	Lipid_12	Lipid_13	Lipid_14	Lipid_15	Lipid_16	Lipid_17	Lipid_18	Lipid_19	Lipid_20	Lipid_21	Lipid_22	Lipid_23	Lipid_24	Lipid_25	Lipid_26	Lipid_27	Lipid_28	Lipid_29	Lipid_30	Lipid_31	Lipid_32	Lipid_33	Lipid_34	Lipid_35	Lipid_36	Lipid_37	Lipid_38	Lipid_39	Lipid_40	Lipid_41	Lipid_42	Lipid_43	Lipid_44	Lipid_45	Lipid_46	Lipid_47	Lipid_48	Lipid_49
body weight (g)	0	0	0	0	0	0	0	0	0	0	0	0	0	0	0	0	0	0	0	0	0	0	0	0	0	0	0	0	0	0	0	0	0	0	0	0	0	0	0	0	0	0	0	0	0	0	0	0	0
lean mass	0	0	0	0	0	0	0	0	0	0	0	0	0	0	0	0	0	0	0	0	0	0	0	0	0	0	0	0	0	0	0	0	0	0	0	0	0	0	0	0	0	0	0	0	0	0	0	0	0
fat mass	0	0	0	0	0	0	0	0	0	0	0	0	0	0	0	0	0	0	0	0	0	0	0	0	0	0	0	0	0	0	0	0	0	0	0	0	0	0	0	0	0	0	0	0	0	0	0	0	0
Gastrocnemius muscle mass (g)	0	0	0	0	0	0	0	0	0	0	0	0	0	0	0	0	0	0	0.542735	0	0	0	0	0	0	0	0	0	0	0	0	0	0	0	0	0	0	0	0	0	0	0	0	0	0	0	0	0	0
Sciatic response amplitude (mV)	0	0	0	0	0	0	0	0	0	-0.464591	0	0	0	0	0	0	0.436508	0	0.496337	0	0	0	0	0	0	-0.537241	0	0	0	0	0	0	0	0	0	0	0	0	0	0	0	-0.56044	0	0	0	0	0	0	0
Triceps muscle mass (g)	0	0	0	0	0	0	0	0	0	0	0	0	0	0	0	0	0	0	0	0	0	0	0	0	0	0	0	0	0	0	0	0	0	0	0	0	0	0	0	0	0	0	0	0	0	0	0	0	0
Radial response amplitude (mV)	0	0	0	0	0	0	0	0	0	0	0	0	0	0	-0.62769	0	0	0	0	0	0	0	0	0	0	0	-0.605404	0	0	0	0	0	0	0	0	0	0	0	0	0	0	0	0	0	-0.58098	-0.538544	0	0	0
Heart muscle mass	0	0	0	0	0	0	0	0	0	0	0	0	0	0	0	0	0	0	0	0	0	0	0	0	0	0	0	0	0	0	0	0	0	0	0	0	0	0	0	0	0	0	0	0	0	0	0	0	0
B12 total (pmol/L)	0	0	0	0	0	0	0	0	0	0	0	0	0	0	0	0	0	0	0	0	0	0	0	0	0	0	0	0	0	0	0	0	0	0	0	0	0	0	0	0	0	0	0	0	0	0	0	0	0
folate level (nmol/L)	0	0	0	0	0	0	0	0	0	0	0	0	0	0	0	0	0	0	0	0	0	0	0	0	0	0	0	0	0	0	0	0	0	0	0	0	0	0	0	0	0	0	0	0	0	0	0	0	0
							Other statistically signigicant correlattions between lipids and metadata
								Lipid_10	Lipid_15	Lipid_17	Lipid_19	Lipid_26	Lipid_27	Lipid_42	Lipid_45	Lipid_46	Lipid_55	Lipid_63	Lipid_65	Lipid_67	Lipid_69	Lipid_73	Lipid_74	Lipid_76	Lipid_85	Lipid_89	Lipid_92	Lipid_94	Lipid_122
							Gastrocnemius muscle mass (g)	0	0	0	0.542735	0	0	0	0	0	-0.559219	0	0	-0.535409	0	0	0	0	0	0	-0.531746	0	0
							Sciatic response amplitude (mV)	-0.464591	0	0.436508	0.496337	-0.537241	0	-0.56044	0	0	-0.42674	-0.487179	-0.491453	-0.517094	-0.455433	-0.493284	-0.413919	-0.427961	-0.489621	-0.515263	-0.547619	-0.58486	-0.478632
							Radial response amplitude (mV)	0	-0.62769	0	0	0	-0.605404	0	-0.58098	-0.538544	0	0	0	0	0	0	0	0	0	0	0	0	-0.531522
	Lipid_17	Lipid_19	Lipid_63	Lipid_89
Gastrocnemius muscle mass (g)	0	0.542735	0	0
Sciatic response amplitude (mV)	0.436508	0.496337	-0.487179	-0.515263
	LPC 20:5	LPC 20:3	PC 37:4	SE 20:4
[truncated: 73 more columns]

## Sheet: Lipid_All_SigOTUCorrelations
Shaded columns indicate significantly altered lipids
	Lipid_1	Lipid_2	Lipid_3	Lipid_4	Lipid_5	Lipid_6	Lipid_7	Lipid_8	Lipid_9	Lipid_10	Lipid_11	Lipid_12	Lipid_13	Lipid_14	Lipid_15	Lipid_16	Lipid_17	Lipid_18	Lipid_19	Lipid_20	Lipid_21	Lipid_22	Lipid_23	Lipid_24	Lipid_25	Lipid_26	Lipid_27	Lipid_28	Lipid_29	Lipid_30	Lipid_31	Lipid_32	Lipid_33	Lipid_34	Lipid_35	Lipid_36	Lipid_37	Lipid_38	Lipid_39	Lipid_40	Lipid_41	Lipid_42	Lipid_43	Lipid_44	Lipid_45	Lipid_46	Lipid_47	Lipid_48	Lipid_49
Otu0005	0	0	0	0	0	0	0	0	0	0	0	0	0	0	0	0	0	0	0	0	0	0	0	0	0	0	0	0	0	0	0	0	0	0	0	0	0	0	0	0	0	0	0	0	0	0	0	0	0
Otu0018	0	0	0	0	0	0	0	0	0	0	0	0	0	0	0	0	0	0	0	0	0	0	0	0	0	0	0	0	0	0	0	0	0	0	0	0	0	0	0	0	0	0	0	0	0	0	0	0	0
Otu0022	0	0	0	0	0	0	0	0	0	0	0	0	0	0	0	0	0	0	0	0	0	0	0	0	0	0	0	0	0	0	0	0	0	0	0	0	0	0	0	0	0	0	0	0	0	0	0	0	0
Otu0055	0	0	0	0	0	0	0	0	0	0	0	0	0	0	0	0	0	0	0	0	0	0	0	0	0	0	0	0	0	0	0	0	0	0	0	0	0	0	0	0	0	0	0	0	0	0	0	0	0
Otu0098	0	0	0	0	0	0	0	0	0	0	0	0	0	0	0	0	0	0	0	0	0	0	0	0	0	0	0	0	0	0	0	0	0	0	0	0	0	0	0	0	0	0	0	0	0	0	0	0	0
Otu0126	0	0	-0.496411	0	0	0	0	0	0	0	0	0	0	0	0	0	-0.716532	0	-0.624943	0	0	0	0	-0.562662	0	0	0	0	0	0	0	0	0	0	0	0	0	0	0	0	0	0	0	0	0	0	0	0	0
Otu0128	0	0	0	0	0	0	0	0	0	0	0	0	0	0	0	0	0	0	0	0	0	0	0	0	0	0	0	0	0	0	0	0	0	0	0	0	0	0	0	0	0	0	0	0	0	0	0	0	0
Otu0134	0	0	0	0	0	0	0	0	0	0	0	0	0	0	0	0	0	0	0	0	0	0	0	0	0	0	0	0	0	0	0	0	0	0	0	0	0	0	0	0	0	0	0	0	0	0	0	0	0
Otu0143	0	0	0	0	0	0	0	0	0	0	0	0	0	0	0	0	0	0	0	0	0	0	0	0	0	0	0	0	0	0	0	0	0	0	0	0	0	0	0	0	0	0	0	0	0	0	0	0	0
Otu0177	0	0	0	0	0	0	0	0	0	0	0	0	0	0	0	0	0	0	0	0	0	0	0	0	0	0	0	0	0	0	0	0	0	0	0	0	0	0	0	0	0	0	0	0	0	0	0	0	0
Otu0178	0	0	0	0	0	0	0	0	0	0	0	0	0	0	0	0	0	0	0	0	0	0	0	0	0	0	0	0	0	0	0	0	0	0	0	0	0	0	0	0	0	0	0	0	0	0	0	0	0
Otu0207	0	0	0	0	0	0	0	0	0	0	0	0	0	0	0	0	0	0	0	0	0	0	0	0	0	0	0	0	0	0	0	0	0	0	0	0	0	0	0	0	0	0	0	0	0	0	0	0	0
Otu0212	0	0	0	0	0	0	0	0	0	0	0	0	0	0	0	0	0	0	0	0	0	0	0	0	0	0	0	0	0	0	0	0	0	0	0	0	0	0	0	0	0	0	0	0	0	0	0	0	0
Otu0214	0	0	0	0	0	0	0	0	0	0	0	0	0	0	0	0	0	0	0	0	0	0	0	0	0	0	0	0	0	0	0	0	0	0	0	0	0	0	0	0	0	0	0	0	0	0	0	0	0
Otu0222	0	0	0	0	0	0	0	0	0	0	0	0	0	0	0	0	0	0	0	0	0	0	0	0	0	0	0	0	0	0	0	0	0	0	0	0	0	0	0	0	0	0	0	0	0	0	0	0	0
Otu0229	0	0	0	0	0	0	0	0	0	0	0	0	0	0	0	0	-0.442913	0	0	0	0	0	0	0	0	0	0	0	0	0	0	0	0	0	0	0	0	0	0	0	0	0	0	0	0	0	0	0	0
Otu0232	0	0	0	0	0	0	0	0	0	0	0	0	0	0	0	0	0	0	0	0	0	0	0	0	0	0	0	0	0	0	0	0	0	0	0	0	0	0	0	0	0	0	0	0	0	0	0	0	0
Otu0245	0	0	0	0	0	0	0	0	0	0	0	0	0	0	0	0	0	0	0	0	0	0	0	0	0	0	0	0	0	0	0	0	0	0	0	0	0	0	0	0	0	0	0	0	0	0	0	0	0
Otu0269	0	0	0	0	0	0	0	0	0	0	0	0	0	0	0	0	0.501832	0	0	0	0	0	0	0	0	0	0	0	0	0	0	0	0	0	0	0	0	0	0	0	0	0	0	0	0	0	0	0	0
Otu0274	0	0	0	0	0	0	0	0	0	0	0	0	0	0	0	0	0	0	0	0	0	0	0	0	0	0	0	0	0	0	0	0	0	0	0	-0.620713	0	0	0	0	0	0	0	0	0	0	0	0	0
Otu0299	0	0	0	0	0	0	0	0	0	0	0	0	0	0	0	0	0	0	0	0	0	0	0	0	0	0	0	0	0	0	0	0	0	0	0	0	0	0	0	0	0	0	0	0	0	0	0	0	0
Otu0319	0	0	0	0	0	0	0	0	0	0	0	0	0	0	0	0	0	0	0	0	0	0	0	0	0	0	0	0	0	0	0	0	0	0	0	0	0	0	0	0	0	0	0	0	0	0	0	0	0
Otu0349	0	0	0	0	0	0	0	0	0	0	0	0	0	0	0	0	0	0	0	0	0	0	0	0	0	0	0	0	0	0	0	0	0	0	0	0	0	0	0	0	0	0	0	0	0	0	0	0	0
Otu0354	0	0	0	0	0	0	0	0	0	0	0	0	0	0	0	0	0	0	0	0	0	0	0	0	0	0	0	0	0	0	0	0	0	0	0	0	0	0	0	0	0	0	0	0	0	0	0	0	0
Otu0371	0	0	0	0	0	0	0	0	0	0	0	0	0	0	0	0	0	0	0	0	0	0	0	0	0	0	0	0	0	0	0	0	0	0	0	0	0	0	0	0	0	0	0	0	0	0	0	0	0
Otu0408	0	0	0	0	0	0	0	0	0	0	0	0	0	0	0	0	0	0	0	0	0	0	0	0	0	0	0	0	0	0	0	0	0	0	0	0	0	0	0	0	0	0	0	0	0	0	0	0	0
Otu0420	0	0	0	0	0	0	0	0	0	0	0	0	0	0	0	0	0	0	0	0	0	0	0	0	0	0	0	0	0	0	0	0	0	0	0	0	0	0	0	0	0	0	0	0	0	0	0	0	0
Otu0423	0	0	0	0	0	0	0	0	0	0	0	0	0	0	0	0	0	0	0	0	0	0	0	0	0	0	0	0	0	0	0	0	0	0	0	0	0	0	0	0	0	0	0	0	0	0	0	0	0
Otu0426	0	0	0	0	0	0	0	0	0	0	0	0	0	0	0	0	0	0	0	0	0	0	0	0	0	0	0	0	0	0	0	0	0	0	0	0	0	0	0	0	0	0	0	0	0	0	0	0	0
Otu0435	0	0	0	0	0	0	0	0	0	0	0	0	0	0	0	0	0	0	0	0	0	0	0	0	0	0	0	0	0	0	0	0	0	0	0	0	0	0	0	0	0	0	0	0	0	0	0	0	0
Otu0482	0	0	0	0	0	0	0	0	0	0	0	0	0	0	0	0	0	0	0	0	0	0	0	0	0	0	0	0	0	0	0	0	0	0	0	0	0	0	0	0	0	0	0	0	0	0	0	0	0
Otu0486	0	0	0	0	0	0	0	0	0	0	0	0	0	0	0	0	0	0	0	0	0	0	0	0	0	0	0	0	0	0	0	0	0	0	0	0	0	0	0	0	0	0	0	0	0	0	0	0	0
Otu0496	0	0	0	0	0	0	0	0	0	0	0	0	0	0	0	0	0	0	0	0	0	0	0	0	0	0	0	0	0	0	0	0	0	0	0	0	0	0	0	0	0	0	0	0	0	0	0	0	0
Otu0499	0	0	0	0	0	0	0	0	0	0	0	0	0	0	0	0	0	0	0	0	0	0	0	0	0	0	0	0	0	0	0	0	0	0	0	0	0	0	0	0	0	0	0	0	0	0	0	0	0
Otu0502	0	0	0	0	0	0	0	0	0	0	0	0	0	0	0	0	0	0	0	0	0	0	0	0	0	0	0	0	0	0	0	0	0	0	0	0	0	0	0	0	0	0	0	0	0	0	0	0	0
Otu0513	0	0	0	0	0	0	0	0	0	0	0	0	0	0	0	0	0	0	0	0	0	0	0	0	0	0	0	0	0	0	0	0	0	0	0	0	0	0	0	0	0	0	0	0	0	0	0	0	0
Otu0538	0	0	0	0	0	0	0	0	0	0	0	0	0	0	0	0	0	0	0	0	0	0	0	0	0	0	0	0	0	0	0	0	0	0	0	0	0	0	0	0	0	0	0	0	0	0	0	0	0
Otu0550	0	0	0	0	0	0	0	0	0	0	0	0	0	0	0	0	0	0	0	0	0	0	0	0	0	0	0	0	0	0	0	0	0	0	0	0	0	0	0	0	0	0	0	0	0	0	0	0	0
Otu0557	0	0	0	0	0	0	0	0	0	0	0	0	0	0	0	0	0	0	0	0	0	0	0	0	0	0	0	0	0	0	0	0	0	0	0	0	0	0	0	0	0	0	0	0	0	0	0	0	0
Otu0558	0	0	0	0	-0.436031	0	0	0	0	0	0	0	0	0	0	0	-0.511522	0	-0.477379	0	0	0	0	0	-0.472909	0	0	0	0	0	0	0	0	0	0	0	0	0	0	0	0	0.457018	0	0	0	0	0	0	0
Otu0560	0	0	0	0	0	0	0	0	0	0	0	0	0	0	0	0	0	0	0	0	0	0	0	0	0	0	0	0	0	0	0	0	0	0	0	0	0	0	0	0	0	0	0	0	0	0	0	0	0
Otu0570	0	0	0	0	0	0	0	0	0	0	0	0	0	0	0	0	0	0	0	0	0	0	0	0	0	0	0	0	0	0	0	0	0	0	0	0	0	0	0	0	0	0	0	0	0	0	0	0	0
Otu0575	0	0	0	0	0	0	0	0	0	0	0	0	0	0	0	0	0	0	0	0	0	0	0	0	0	0	0	0	0	0	0	0	0	0	0	0	0	0	0	0	0	0	0	0	0	0	0	0	0
Otu0595	0	0	0	0	0	0	0	0	0	0	0	0	0	0	0	0	0	0	0	0	0	0	0	0	0	0	0	0	0	0	0	0	0	0	0	0	0	0	0	0	0	0	0	0	0	0	0	0	0
Otu0599	0	0	0	0	0	0	0	0	0	0	0	0	0	0	0	0	-0.56767	0	-0.555422	0	0	0	0	-0.50337	0	0	0	0	0	0	0	0	0	0	0	-0.44397	0	0	0	0	0	0	0	0.48255	0	0	0	0	0
Otu0616	0	0	0	0	0	0	0	0	0	0	0	0	0	0	0	0	0	0	0	0	0	0	0	0	0	0	0	0	0	0	0	0	0	0	0	0	0	0	0	0	0	0	0	0	0	0	0	0	0
Otu0630	0	0	0	0	0	0	0	0	0	0	0	0	0	0	0	0	0	0	0	0	0	0	0	0	0	0	0	0	0	0	0	0	0	0	0	0	0	0	0	0	0	0	0	0	0	0	0	0	0
Otu0638	0	0	0	0	0	0	0	0	0	0	0	0	0	0	0	0	0	0	0	0	0	0	0	0	0	0	0	0	0	0	0	0	0	0	0	0	0	0	0	0	0	0	0	0	0	0	0	0	0
Otu0648	0	0	0	0	0	0	0	0	0	0	0	0	0	0	0	0	0	0	0	0	0	0	0	0	0	0	0	0	0	0	0	0	0	0	0	0	0	0	0	0	0	0	0	0	0	0	0	0	0
Otu0649	0	0	0	0	0	0	0	0	0	0	0	0	0	0	0	0	0	0	0	0	0	0	0	0	0	0	0	0	0	0	0	0	0	0	0	0	0	0	0	0	0	0	0	0	0	0	0	0	0
Otu0705	0	0	0	0	0	0	0	0	0	0	0	0	0	0	0	0	0	0	0	0	0	0	0	0	0	0	0	0	0	0	0	0	0	0	0	-0.604783	0	0	0	0	0	0	0	0.697981	0	0	0	0	0
Otu0725	0	0	0	0	0	0	0	0	0	0	0	0	0	0	0	0	0	0	0	0	0	0	0	0	0	0	0	0	0	0	0	0	0	0	0	0	0	0	0	0	0	0	0	0	0	0	0	0	0
Otu0726	0	0	0	0	0	0	0	0	0	0	0	0	0	0	0	0	0	0	0	0	0	0	0	0	0	0	0	0	0	0	0	0	0	0	0	0	0	0	0	0	0	0	0	0	0	0	0	0	0
Otu0728	0	0	0	0	0	0	0	0	0	0	0	0	0	0	0	0	0	0	0	0	0	0	0	0	0	0	0	0	0	0	0	0	0	0	0	0	0	0	0	0	0	0	0	0	0	0	0	0	0
Otu0730	0	0	0	0	0	0	0	0	0	0	0	0	0	0	0	0	0	0	0	0	0	0	0	0	0	0	0	0	0	0	0	0	0	0	0	0	0	0	0	0	0	0	0	0	0	0	0	0	0
Otu0733	0	0	0	0	0	0	0	0	0	0	0	0	0	0	0	0	-0.601644	0	-0.571817	0	0	0	0	0	0	0	0	0	0	0	0	0	0	0	0	-0.497611	0	0	0	0	0	0.552174	0	0	0	0	0	0	0
Otu0761	0	0	0	0	0	0	0	0	0	0	0	0	0	0	0	0	0.542125	0	0.504884	0	0	0	0	0	0	0	0	0	0	0	0	0	0	0	0	0.498168	0	0	0	0	0	0	0	0	0	0	0	0	0
Otu0782	0	0	0	0	0	0	0	0	0	0	0	0	0	0	0	0	0	0	0	0	0	0	0	0	0	0	0	0	0	0	0	0	0	0	0	0	0	0	0	0	0	0	0	0	0	0	0	0	0
Otu0809	0	0	0	0	0	0	0	0	0	0	0	0	0	0	0	0	0	0	0	0	0	0	0	0	0	0	0	0	0	0	0	0	0	0	0	0	0	0	0	0	0	0	0	0	0	0	0	0	0
Otu0829	0	0	0	0	0	0	0	0	0	0	0	0	0	0	0	0	0	0	0	0	0	0	0	0	0	0	0	0	0	0	0	0	0	0	0	0	0	0	0	0	0	0	0	0	0	0	0	0	0
Otu0834	0	0	0	0	0	0	0	0	0	0	0	0	0	0	0	0	0	0	0	0	0	0	0	0	0	0	0	0	0	0	0	0	0	0	0	0	0	0	0	0	0	0	0	0	0	0	0	0	0
Otu0874	0	0	0	0	0	0	0	0	0	0	0	0	0	0	0	0	0	0	0	0	0	0	0	0	0	0	0	0	0	0	0	0	0	0	0	0	0	0	0	0	0	0	0	0	0	0	0	0	0
Otu0875	0	0	0	0	0	0	0	0	0	0	0	0	0	0	0	0	0	0	0.54884	0	0	0	0	0	0	0	0	0	0	0	0	0	0	0	0	0	0	0	0	0	0	0	0	0	0	0	0	0	0
Otu0892	0	0	0	0	0	0	0	0	0	0	0	0	0	0	0	0	0	0	0	0	0	0	0	0	0	0	0	0	0	0	0	0	0	0	0	0	0	0	0	0	0	0	0	0	0	0	0	0	0
Otu0907	0	0	0	0	0	0	0	0	0	0	0	0	0	0	0	0	0	0	0	0	0	0	0	0	0	0	0	0	0	0	0	0	0	0	0	0	0	0	0	0	0	0	0	0	0	0	0	0	0
Otu0914	0	0	0	0	0	0	0	0	0	0	0	0	0	0	0	0	0	0	0	0	0	0	0	0	0	0	0	0	0	0	0	0	0	0	0	0	0	0	0	0	0	0	0	0	0	0	0	0	0
Otu0922	0	0	0	0	0	0	0	0	0	0	0	0	0	0	0	0	0	0	0	0	0	0	0	0	0	0	0	0	0	0	0	0	0	0	0	0	0	0	0	0	0	0	0	0	0	0	0	0	0
Otu0929	0	0	0	0	0	0	0	0	0	0	0	0	0	0	0	0	0	0	0	0	0	0	0	0	0	0	0	0	0	0	0	0	0	0	0	0	0	0	0	0	0	0	0	0	0	0	0	0	0
Otu0937	0	0	0	0	0	0	0	0	0	0	0	0	0	0	0	0	0.620204	0	0.537064	0	0	0	0	0	0	0	0	0	0	0	0	0	0	0	0	0	0	0	0	0	0	0	0	0	0	0	0	0	0
Otu0954	0	-0.405561	-0.37252	0	0	0	0	0	0	0.360807	0	-0.377045	0	0	0	0	-0.586163	0	-0.631709	-0.356846	0	0	0	-0.500219	0	0.393284	0	0	0	0	0	0	0	0	0	-0.527151	0	0	0	0	0	0.507744	0.482295	0.477248	0	0	0	0	0
Otu0959	0	0	0	0	0	0	0	0	0	0	0	0	0	0	0	0	0	0	0	0	0	0	0	0	0	0	0	0	0	0	0	0	0	0	0	0	0	0	0	0	0	0	0	0	0	0	0	0	0
Otu0962	0	0	0	0	0	0	0	0	0	0	0	0	0	0	0	0	0	0	0	0	0	0	0	0	0	0	0	0	0	0	0	0	0	0	0	0	0	0	0	0	0	0	0	0	0	0	0	0	0
Otu0973	0	0	0	0	0	0	0	0	0	0	0	0	0	0	0	0	0	0	0	0	0	0	0	0	0	0	0	0	0	0	0	0	0	0	0	0	0	0	0	0	0	0	0	0	0	0	0	0	0
Otu0979	0	0	0	0	0	0	0	0	0	0	0	0	0	0	0	0	-0.552538	0	-0.541625	0	0	0	0	-0.478333	0	0	0	0	0.471058	0	0	0	0	0	0	-0.452143	0	0	0	0	0	0.473604	0	0.578	0	0	0	0	0
Otu1004	0	0	0	0	0	0	0	0	0	0	0	0	0	0	0	0	0	0	0	0	0	0	0	0	0	0	0	0	0	0	0	0	0	0	0	0	0	0	0	0	0	0	0	0.686813	0	0	0	0	0
Otu1008	0	0	0	0	0	0	0	0	0	0	0	0	0	0	0	0	0	0	0	0	0	0	0	0	0	0	0	0	0	0	0	0	0	0	0	0	0	0	0	0	0	0	0	0	0	0	0	0	0
Otu1015	0	0	0	0	0	0	0	0	0	0	0	0	0	0	0	0	0	0	0	0	0	0	0	0	0	0	0	0	0	0	0	0	0	0	0	0	0	0	0	0	0	0	0	0	0	0	0	0	0
Otu1039	-0.615385	0	0	0	0	0	0	0	0	0	0	0	0	0	0	0	0	0	0	0	0	0	0	0	0	0	0	0	0	0	0	0	0	0	0	0	0	0	0	0	0	0	0	0	0	0	0	0	0
Otu1070	0	0	0	0	0	0	0	0	0	0	0	0	0	0	0	0	0	0	0	0	0	0	0	0	0	0	0	0	0	0	0	0	0	0	0	0	0	0	0	0	0	0	0	0	0	0	0	0	0
Otu1079	0	0	0	0	0	0	0	0	0	0	0	0	0	0	0	0	0	0	0	0	0	0	0	0	0	0	0	0	0	0	0	0	0	0	0	0	0	0	0	0	0	0	0	0	0	0	0	0	0
Otu1081	0	0	0	0	0	0	0	0	0.51904	0	0	0	0	0	0	0	0.483017	0	0	0	0	0	0	0	0	0	0	0	0	0	0	0	0	0	0.475186	0.549111	0	0	0.547858	0	0	0	0	0	0	0	0	0	0
Otu1094	0	0	0	0	0	0	0	0	0	0	0	0	0	0	0	0	0	0	0	0	0	0	0	0	0	0	0	0	0	0	0	0	0	0	0	0	0	0	0	0	0	0	0	0	0	0	0	0	0
Otu1102	0	0	0	0	0	0	0	0	0	0	0	0	0	0	0	0	0	0	0	0	0	0	0	0	0	0	0	0	0	0	0	0	0	0	0	0	0	0	0	0	0	0	0	0	0	0	0	0	0
Otu1104	0	0	0	0	0	0	0	0	0	0	0	0	0	0	0	0	0	0	0	0	0	0	0	0	0	0	0	0	0	0	0	0	0	0	0	0	0	0	0	0	0	0	0	0	0	0	0	0	0
Otu1106	0	0	0	0	0	0	0	0	0	0	0	0	0	0	0	0	0	0	0	0	0	0	0	0	0	0	0	0	0	0	0	0	0	0	0	0	0	0	0	0	0	0	0	0	0	0	0	0	0
Otu1130	0	0	0	0	0	0	0	0	0	0	0	0	0	0	0	0	0	0	0	0	0	0	0	0	0	0	0	0	0	0	0	0	0	0	0	0	0	0	0	0	0	0	0	0	0	0	0	0	0
Otu1133	0	0	0	0	0	0	0	0	0	0	0	0	0	0	0	0	0	0	0	0	0	0	0	0	0	0	0	0	0	0	0	0	0	0	0	0	0	0	0	0	0	0	0	0	0	0	0	0	0
Otu1134	0	0	0	0	0	0	0	0	0	0	0	0	0	0	0	0	0	0	0	0	0	0	0	0	0	0	0	0	0	0	0	0	0	0	0	0	0	0	0	0	0	0	0	0	0	0	0	0	0
Otu1137	0	0	0	0	0	0	0	0	0	0	0	0	0	0	0	0	0	0	0	0	0	0	0	0	0	0	0	0	0	0	0	0	0	0	0	0	0	0	0	0	0	0	0	0	0	0	0	0	0
Otu1145	0	0	0	0	0	0	0	0	0	0	0	0	0	0	0	0	0	0	0	0	0	0	0	0	0	0	0	0	0	0	0	0	0	0	0	0	0	0	0	0	0	0	0	0	0	0	0	0	0
Otu1148	0	0	0	0	0	0	0	0	0	0	0	0	0	0	0	0	0	0	0	0	0	0	0	0	0	0	0	0	0	0	0	0	0	0	0	0	0	0	0	0	0	0	0	0	0	0	0	0	0
Otu1166	0	0	0	0	0	0	0	0	0	0	0	0	0	0	0	0	0	0	0	0	0	0	0	0	0	0	0	0	0	0	0	0	0	0	0	0	0	0	0	0	0	0	0	0	0	0	0	0	0
Otu1180	0	0	0	0	0	0	0	0	0	0	0	0	0	0	0	0	0	0	0	0	0	0	0	0	0	0	0	0	0	0	0	0	0	0	0	0	0	0	0	0	0	0	0	0	0	0	0	0	0
Otu1184	0	0	0	0	0	0	0	0	0	0	0	0	0	0	0	0	0	0	0	0	0	0	0	0	0	0	0	0	0	0	0	0	0	0	0	0	0	0	0	0	0	0	0	0	0	0	0	0	0
Only the part selected for plotting:
	Lipid_17	Lipid_19	Lipid_44	Lipid_63	Lipid_89
Otu0229	-0.442913	0	0	0	0	Bacteria(100)-Firmicutes(100)-Clostridia(100)-Clostridiales(100)-Lachnospiraceae(100)-Lachnospiracea_incertae_sedis(100)-	Cat 10				Bacteria(100)	Firmicutes(100)	Clostridia(100)	Clostridiales(100)	Lachnospiraceae(100)	Lachnospiracea_incertae_sedis(100)
Otu0126	-0.716532	-0.624943	0	0.585254	0	Bacteria(100)-Firmicutes(100)-Clostridia(100)-Clostridiales(100)-Lachnospiraceae(100)-Clostridium_XlVa(100)-	Cat 15				Bacteria(100)	Firmicutes(100)	Clostridia(100)	Clostridiales(100)	Lachnospiraceae(100)	Clostridium_XlVa(100)
Otu0558	-0.511522	-0.477379	0	0.574797	0	Bacteria(100)-Firmicutes(100)-Clostridia(100)-Clostridiales(100)-Lachnospiraceae(100)-Clostridium_XlVa(100)-	Cat 15				Bacteria(100)	Firmicutes(100)	Clostridia(100)	Clostridiales(100)	Lachnospiraceae(100)	Clostridium_XlVa(100)
Otu0599	-0.56767	-0.555422	0.48255	0.496022	0	Bacteria(100)-Firmicutes(100)-Clostridia(100)-Clostridiales(100)-Lachnospiraceae(100)-Clostridium_XlVa(100)-	Cat 15				Bacteria(100)	Firmicutes(100)	Clostridia(100)	Clostridiales(100)	Lachnospiraceae(100)	Clostridium_XlVa(100)
Otu0705	0	0	0.697981	0	0	Bacteria(100)-Proteobacteria(100)-Alphaproteobacteria(100)-Rhodospirillales(100)-Rhodospirillaceae(100)-Dongia(100)-	Cat 15				Bacteria(100)	Proteobacteria(100)	Alphaproteobacteria(100)	Rhodospirillales(100)	Rhodospirillaceae(100)	Dongia(100)
Otu0733	-0.601644	-0.571817	0	0.613648	0.486335	Bacteria(100)-Firmicutes(100)-Clostridia(100)-Clostridiales(100)-Lachnospiraceae(100)-Parasporobacterium(100)-	Cat 15				Bacteria(100)	Firmicutes(100)	Clostridia(100)	Clostridiales(100)	Lachnospiraceae(100)	Parasporobacterium(100)
Otu0954	-0.586163	-0.631709	0.477248	0.524378	0.559231	Bacteria(100)-Proteobacteria(100)-Betaproteobacteria(100)-Burkholderiales(100)-Sutterellaceae(100)-Sutterella(100)-	Cat 15				Bacteria(100)	Proteobacteria(100)	Betaproteobacteria(100)	Burkholderiales(100)	Sutterellaceae(100)	Sutterella(100)
Otu0979	-0.552538	-0.541625	0.578	0.604554	0.610011	Bacteria(100)-Firmicutes(100)-Clostridia(100)-Clostridiales(100)-Ruminococcaceae(100)-Butyricicoccus(100)-	Cat 15				Bacteria(100)	Firmicutes(100)	Clostridia(100)	Clostridiales(100)	Ruminococcaceae(100)	Butyricicoccus(100)
Otu1004	0	0	0.686813	0	0	Bacteria(100)-Elusimicrobia(100)-Elusimicrobia(100)-Elusimicrobiales(100)-Elusimicrobiaceae(100)-Elusimicrobium(100)-	Cat 15				Bacteria(100)	Elusimicrobia(100)	Elusimicrobia(100)	Elusimicrobiales(100)	Elusimicrobiaceae(100)	Elusimicrobium(100)
Otu0761	0.542125	0.504884	0	-0.520147	-0.614774	Bacteria(100)-Firmicutes(100)-Clostridia(100)-Clostridiales(100)-Lachnospiraceae(100)-Anaerostipes(100)-	Cat 18				Bacteria(100)	Firmicutes(100)	Clostridia(100)	Clostridiales(100)	Lachnospiraceae(100)	Anaerostipes(100)
Otu0875	0	0.54884	0	0	0	Bacteria(100)-Bacteroidetes(100)-Bacteroidia(100)-Bacteroidales(100)-Porphyromonadaceae(100)-Barnesiella(100)-	Cat 18				Bacteria(100)	Bacteroidetes(100)	Bacteroidia(100)	Bacteroidales(100)	Porphyromonadaceae(100)	Barnesiella(100)
Otu0937	0.620204	0.537064	0	-0.607465	-0.501528	Bacteria(100)-Firmicutes(100)-Clostridia(100)-Clostridiales(100)-Ruminococcaceae(100)-Clostridium_III(100)-	Cat 18				Bacteria(100)	Firmicutes(100)	Clostridia(100)	Clostridiales(100)	Ruminococcaceae(100)	Clostridium_III(100)
Otu1081	0.483017	0	0	0	0	Bacteria(100)-Actinobacteria(100)-Actinobacteria(100)-Coriobacteriales(100)-Coriobacteriaceae(100)-Olsenella(100)-	Cat 18				Bacteria(100)	Actinobacteria(100)	Actinobacteria(100)	Coriobacteriales(100)	Coriobacteriaceae(100)	Olsenella(100)
Otu0269	0.501832	0	0	-0.510379	0	Bacteria(100)-Firmicutes(100)-Clostridia(100)-Clostridiales(100)-Ruminococcaceae(100)-Papillibacter(100)-	Cat 18				Bacteria(100)	Firmicutes(100)	Clostridia(100)	Clostridiales(100)	Ruminococcaceae(100)	Papillibacter(100)
	LPC 20:5	LPC 20:3	LPI 16:0	PC 37:4	SE 20:4
[truncated: 73 more columns]

## Sheet: Lipid_All_SigMFCsCorrelations
Shaded columns indicate significantly altered lipids
	Lipid_1	Lipid_2	Lipid_3	Lipid_4	Lipid_5	Lipid_6	Lipid_7	Lipid_8	Lipid_9	Lipid_10	Lipid_11	Lipid_12	Lipid_13	Lipid_14	Lipid_15	Lipid_16	Lipid_17	Lipid_18	Lipid_19	Lipid_20	Lipid_21	Lipid_22	Lipid_23	Lipid_24	Lipid_25	Lipid_26	Lipid_27	Lipid_28	Lipid_29	Lipid_30	Lipid_31	Lipid_32	Lipid_33	Lipid_34	Lipid_35	Lipid_36	Lipid_37	Lipid_38	Lipid_39	Lipid_40	Lipid_41	Lipid_42	Lipid_43	Lipid_44	Lipid_45	Lipid_46	Lipid_47	Lipid_48	Lipid_49
K05597	0.42668	-0.16296	-0.135762	0.140772	0.552174	0	0.152048	0	0	0.265902	0	0	0.381939	0.253171	0.14841	0.287363	0	0.188059	0	0	0.181148	0	0.192424	-0.293547	0.295411	0.291365	0	0	0.442321	0	0.312826	0.277542	0.190969	0.413585	0.253898	-0.161869	0	0.456144	0.32192	0.166234	0.265175	0.282271	0.160876	0.281907	0	0.547082	0.422315	0.571817	0.569998
K13017	0	0	0	0	0	0	0	0	0	0	0	0	0	0	0	0	0	0	0	0	0	0	0	0	0	0	0	0	0	0	0	0	0	0	0	0	0	0	0	0	0	0	0	0	0	0	0	0	0
K01828	-0.155899	-0.241912	-0.0820313	-0.436785	-0.120956	-0.2446	-0.436785	-0.3669	-0.260727	-0.419314	-0.1223	-0.297014	-0.419314	-0.314485	-0.436785	-0.325237	0.0228472	-0.436785	-0.205625	-0.378995	-0.380339	-0.292982	-0.436785	-0.189498	-0.20028	-0.29567	-0.255351	-0.22444	-0.364212	-0.0134395	-0.243256	-0.162619	0.106172	-0.3669	-0.174714	-0.0766054	-0.227128	-0.192186	-0.192186	-0.384371	-0.192186	-0.3669	-0.400743	-0.279543	-0.201593	-0.209657	-0.102141	-0.1223	-0.103485
K14067	0	0	0	0	0	0	0	0	0	0	0	0	0	0	0	0	0	0	0	0	0	0	0	0	0	0	0	0	0	0	0	0	0	0	0	0	0	0	0	0	0	0	0	0	0	0	0	0	0
K12428	-0.302148	-0.276969	-0.226749	-0.327327	-0.302148	-0.327327	-0.327327	-0.327327	-0.302148	-0.327327	-0.327327	-0.327327	-0.327327	-0.327327	-0.327327	-0.201432	-0.226611	-0.327327	-0.25179	-0.226611	-0.25179	-0.25179	-0.327327	-0.276969	-0.314785	-0.302148	-0.201432	-0.276969	-0.276969	0.075537	-0.302148	-0.100716	0.025179	-0.327327	-0.327327	-0.125895	-0.327327	-0.327327	-0.327327	-0.327327	-0.327327	-0.327327	-0.302332	-0.327327	-0.176253	-0.327327	-0.276969	-0.327327	-0.302148
K05927	0	0	0	0	0	0	0	0	0	0	0	0	0	0	0	0	0	0	0	0	0	0	0	0	0	0	0	0	0	0	0	0	0	0	0	0	0	0	0	0	0	0	0	0	0	0	0	0	0
K05922	0	0	0	0	0	0	0	-0.371997	0	0	0	-0.416583	0	0	0	0	0	0	0	0	0	0	0	0	0	0	0	-0.402622	-0.522418	0	0	-0.386409	0	-0.416583	0	0	0	0	0	0	-0.435948	0	0	0	0	0	0	0	0
K01347	0	-0.179733	-0.129447	-0.0780159	0.069128	-0.192571	0.145169	-0.170845	-0.222197	0.316014	-0.209359	-0.111592	0.128381	0.390079	-0.0780159	0.400942	-0.12048	0.092829	-0.12048	-0.230097	0.390079	-0.210347	0.363416	-0.102704	-0.0622247	0.451307	-0.315026	-0.0632027	0.226147	-0.303176	-0.134306	-0.0780159	-0.197509	-0.109617	0.255774	-0.232073	-0.207384	0.198496	0.303176	0.11258	-0.0997418	0.307126	0.181819	0	-0.192571	0.236023	-0.265649	0	0.247873
K04335	0.075537	-0.025179	-0.0755831	0.226611	0.176253	0.176253	0.276969	-0.201432	0.075537	0.201432	0.050358	-0.201432	0.276969	0.176253	0.025179	0.176253	-0.176253	0.226611	-0.276969	-0.125895	-0.151074	0.125895	0.226611	-0.25179	0.125914	0.226611	0.327327	0.327327	0.302148	0.025179	0.050358	0.302148	0.25179	0.276969	0.276969	-0.151074	-0.125895	0.302148	0.25179	0.151074	0.25179	0.276969	0.125972	0.327327	0.226611	0.327327	0.302148	0.327327	0.302148
K04338	0.075537	-0.025179	-0.0755831	0.226611	0.176253	0.176253	0.276969	-0.201432	0.075537	0.201432	0.050358	-0.201432	0.276969	0.176253	0.025179	0.176253	-0.176253	0.226611	-0.276969	-0.125895	-0.151074	0.125895	0.226611	-0.25179	0.125914	0.226611	0.327327	0.327327	0.302148	0.025179	0.050358	0.302148	0.25179	0.276969	0.276969	-0.151074	-0.125895	0.302148	0.25179	0.151074	0.25179	0.276969	0.125972	0.327327	0.226611	0.327327	0.302148	0.327327	0.302148
K13075	0	0	0	0	0	0	0	0	0	0	0	0	0	0	0	0	0	0	0	0	0	0	0	0	0	0	0	0	0	0	0	0	0	0	0	0	0	0	0	0	0	0	0	0	0	0	0	0	0
K08692	0	0	0	0	0	0	0	0	0	0	0	0	0	0	0	0	0	0	0	0	0	0	0	0	0	0	0	0	0	0	0	0	0	0	0	0	0	0	0	0	0	0	0	0	0	0	0	0	0
K08693	0	0	0	0	0	0	0	0	0	0	0	0	0	0	0	0	0	0	0	0	0	0	0	0	0	0	0	0	0	0	0	0	0	0	0	0	0	0	0	0	0	0	0	0	0	0	0	0	0
K08690	0.396933	0	0	0.181455	0.489928	0	0.190528	0.150456	0	0.292596	0.179187	0	0.44154	0.274451	0.165578	0.308473	0	0.246476	0	0	0.201112	0	0.238916	-0.251013	0.228366	0.215478	0	0	0.353081	-0.130043	0.255549	0.210185	0.130043	0.346276	0.330399	0	0.176919	0.54134	0.409786	0.248744	0.347032	0.292596	0	0.185991	0	0.539828	0.359129	0.532268	0.582924
K11740	0.396933	0	0	0.181455	0.489928	0	0.190528	0.150456	0	0.292596	0.179187	0	0.44154	0.274451	0.165578	0.308473	0	0.246476	0	0	0.201112	0	0.238916	-0.251013	0.228366	0.215478	0	0	0.353081	-0.130043	0.255549	0.210185	0.130043	0.346276	0.330399	0	0.176919	0.54134	0.409786	0.248744	0.347032	0.292596	0	0.185991	0	0.539828	0.359129	0.532268	0.582924
K09929	0.426419	0	0	0	0.480855	0	0	0	0	0	0	0	0	0	0	0	0	0	0	0	0	0	0	0	0	0	0	0	0.390884	0	0	0.43776	0.389372	0.369714	0	0	0	0	0	0	0	0.440028	0	0.406761	0	0	0	0.408273	0.371983
K00752	0	0	0	0	0	0	0	0	0	0	0	0	0	0	0	0	0	0	0	0	0	0	0	0	0	0	0	0	0	0	0	0	0	0	0	0	0	0	0	0	0	0	0	0	0	0	0	0	0
K01668	0.201432	0.327327	0.327527	0.327327	0.276969	0.327327	0.327327	0.327327	0.327327	0.327327	0.327327	0.327327	0.327327	0.302148	0.327327	0.327327	0.327327	0.327327	0.327327	0.25179	0.25179	0.327327	0.327327	0.327327	0	0.327327	-0.25179	0.176253	0.327327	0	0.276969	0.276969	0.151074	0.176253	0.327327	0	0.327327	0.327327	0.302148	0.327327	0.327327	0.327327	0	0	0	0.151074	-0.25179	0	0
K02319	0	0	0	0	0	0	0	0	0	0	0	0	0	0	0	0	0	0	0	0	0	0	0	0	0	0	0	0	0	0	0	0	0	0	0	0	0	0	0	0	0	0	0	0	0	0	0	0	0
K11176	0	0	0	0	0	0	0	0	0	0	0	0	0	0	0	0	0	0	0	0	0	0	0	0	0	0	0	0	0	0	0	0	0	0	0	0	0	0	0	0	0	0	0	0	0	0	0	0	0
K00320	0	0	0	0	0	0	0	0	0	0	0	0	0	0	0	0	0	0	0	0	0	0	0	0	0	0	0	0	0	0	0	0	0	0	0	0	0	0	0	0	0	0	0	0	0	0	0	0	0
K06945	0.297912	-0.240439	0	0	0.408856	0	0	0	0	0.401945	0	0	0.298276	0.411766	0	0.417222	0	0	-0.236438	0	0	0	0.313917	-0.389577	0	0.245532	0	0	0.43541	0	0	0	0	0	0.453961	0	0	0.51689	0.541625	0.344472	0.270995	0.421951	0	0.27827	0	0.640929	0.316827	0.557267	0.646749
K01044	0	0	0	0	0	0	0	0	0	0	0	0	0	0	0	0	0	0	0	0	0	0	0	0	0	0	0	0	0	0	0	0	0	0	0	0	0	0	0	0	0	0	0	0	0	0	0	0	0
K00810	0	0	0	0	0	0	0	0	0	0	0	0	0	0	0	0	0	0	0	0	0	0	0	0	0	0	0	0	0	0	0	0	0	0	0	0	0	0	0	0	0	0	0	0	0	0	0	0	0
K03231	0	0	0	0	0	0	0	0	0	0	0	0	0	0	0	0	0	0	0	0	0	0	0	0	0	0	0	0	0	0	0	0	0	0	0	0	0	0	0	0	0	0	0	0	0	0	0	0	0
K03932	0	0	0	0	0	0	0	0	0	0	0	0	0	0	0	0	0	0	0	0	0	0	0	0	0	0	0	0	0	0	0	0	0	0	0	0	0	0	0	0	0	0	0	0	0	0	0	0	0
K11159	0	0	0	0	0	0	0	0	0	0	0	0	0	0	0	0	0	0	0	0	0	0	0	0	0	0	0	0	0	0	0	0	0	0	0	0	0	0	0	0	0	0	0	0	0	0	0	0	0
K05345	0	0	0	0	0	0	0	0	0	0	0	0	0	0	0	0	0	0	0	0	0	0	0	0	0	0	0	0	0	0	0	0	0	0	0	0	0	0	0	0	0	0	0	0	0	0	0	0	0
K00466	0	0	0	0	0	0	0	0	0	0	0	0	0	0	0	0	0	0	0	0	0	0	0	0	0	0	0	0	0	0	0	0	0	0	0	0	0	0	0	0	0	0	0	0	0	0	0	0	0
K00469	0	0	0	0	0	0	0	0	0	0	0	0	0	0	0	0	0	0	0	0	0	0	0	0	0	0	0	0	0	0	0	0	0	0	0	0	0	0	0	0	0	0	0	0	0	0	0	0	0
K02352	0	0	0	0	0	0	0	0	0	0	0	0	0	0	0	0	0	0	0	0	0	0	0	0	0	0	0	0	0	0	0	0	0	0	0	0	0	0	0	0	0	0	0	0	0	0	0	0	0
K13573	0	0	0	0	0	0	0	0	0	0	0	0	0	0	0	0	0	0	0	0	0	0	0	0	0	0	0	0	0	0	0	0	0	0	0	0	0	0	0	0	0	0	0	0	0	0	0	0	0
K07326	0	0	0	0	0	0	0	0	0	0	0	0	0	0	0	0	0	0	0	0	0	0	0	0	0	0	0	0	0	0	0	0	0	0	0	0	0	0	0	0	0	0	0	0	0	0	0	0	0
K10843	0	0	0	0	0	0	0	0	0	0	0	0	0	0	0	0	0	0	0	0	0	0	0	0	0	0	0	0	0	0	0	0	0	0	0	0	0	0	0	0	0	0	0	0	0	0	0	0	0
K08354	0.075537	-0.025179	-0.0755831	0.226611	0.176253	0.176253	0.276969	-0.201432	0.075537	0.201432	0.050358	-0.201432	0.276969	0.176253	0.025179	0.176253	-0.176253	0.226611	-0.276969	-0.125895	-0.151074	0.125895	0.226611	-0.25179	0.125914	0.226611	0.327327	0.327327	0.302148	0.025179	0.050358	0.302148	0.25179	0.276969	0.276969	-0.151074	-0.125895	0.302148	0.25179	0.151074	0.25179	0.276969	0.125972	0.327327	0.226611	0.327327	0.302148	0.327327	0.302148
K06986	0	0	0	0	0	0	0	0	0	0	0	0	0	0	0	0	0	0	0	0	0	0	0	0	0	0	0	0	0	0	0	0	0	0	0	0	0	0	0	0	0	0	0	0	0	0	0	0	0
K02442	0	0	0	0	0	0	0	0	0	0	0	0	0	0	0	0	0	0	0	0	0	0	0	0	0	0	0	0	0	0	0	0	0	0	0	0	0	0	0	0	0	0	0	0	0	0	0	0	0
K08299	0	0	0	0	0	0	0	0	0	0	0	0	0	0	0	0	0	0	0	0	0	0	0	0	0	0	0	0	0	0	0	0	0	0	0	0	0	0	0	0	0	0	0	0	0	0	0	0	0
K02182	0	0	0	0	0	0	0	0	0	0	0	0	0	0	0	0	0	0	0	0	0	0	0	0	0	0	0	0	0	0	0	0	0	0	0	0	0	0	0	0	0	0	0	0	0	0	0	0	0
K10984	0	0	0	0	0	0	0	0	0	0	0	0	0	0	0	0	0	0	0	0	0	0	0	0	0	0	0	0	0	0	0	0	0	0	0	0	0	0	0	0	0	0	0	0	0	0	0	0	0
K07465	0	0	0	0	0	0	0	0	0	0	0	0	0	0	0	0	0	0	0	0	0	0	0	0	0	0	0	0	0	0	0	0	0	0	0	0	0	0	0	0	0	0	0	0	0	0	0	0	0
K07466	0	0	0	0	0	0	0	0	0	0	0	0	0	0	0	0	0	0	0	0	0	0	0	0	0	0	0	0	0	0	0	0	0	0	0	0	0	0	0	0	0	0	0	0	0	0	0	0	0
K07463	0	0	0	0	0	0	0	0	0	0	0	0	0	0	0	0	0	0	0	0	0	0	0	0	0	0	0	0	0	0	0	0	0	0	0	0	0	0	0	0	0	0	0	0	0	0	0	0	0
K10673	0	0	0	0	0	0	0	0	0	0	0	0	0	0	0	0	0	0	0	0	0	0	0	0	0	0	0	0	0	0	0	0	0	0	0	0	0	0	0	0	0	0	0	0	0	0	0	0	0
K08721	0.396933	-0.100556	-0.0378262	0.14214	0.492952	0.0325107	0.169358	0.12097	0.0438516	0.26311	0.188259	0.0551925	0.411298	0.272182	0.131555	0.278987	0.0778744	0.220014	-0.0937517	-0.0748501	0.155749	-0.0438516	0.218502	-0.23816	0.217779	0.207917	-0.0317546	0.105093	0.331155	-0.133067	0.244964	0.202625	0.153481	0.322082	0.339472	-0.0551925	0.173138	0.540584	0.41659	0.227575	0.350057	0.282767	0.0287479	0.181455	0.0438516	0.532268	0.363666	0.539072	0.588972
K00446	0	0	0	0	0	0	0	0	0	0	0	0	0	0	0	0	0	0	0	0	0	0	0	0	0	0	0	0	0	0	0	0	0	0	0	0	0	0	0	0	0	0	0	0	0	0	0	0	0
K03396	0	0	0	0	0	0	0	0	0	0	0	0	0	0	0	0	0	0	0	0	0	0	0	0	0	0	0	0	0	0	0	0	0	0	0	0	0	0	0	0	0	0	0	0	0	0	0	0	0
K12136	0.201432	0.327327	0.327527	0.327327	0.276969	0.327327	0.327327	0.327327	0.327327	0.327327	0.327327	0.327327	0.327327	0.302148	0.327327	0.327327	0.327327	0.327327	0.327327	0.25179	0.25179	0.327327	0.327327	0.327327	0	0.327327	-0.25179	0.176253	0.327327	0	0.276969	0.276969	0.151074	0.176253	0.327327	0	0.327327	0.327327	0.302148	0.327327	0.327327	0.327327	0	0	0	0.151074	-0.25179	0	0
K12139	0	0	0	0	0	0	0	0	0	0	0	0	0	0	0	0	0	0	0	0	0	0	0	0	0	0	0	0	0	0	0	0	0	0	0	0	0	0	0	0	0	0	0	0	0	0	0	0	0
K11444	0	0	0	0	0	0	0	0	0	0	0	0	0	0	0	0	0	0	0	0	0	0	0	0	0	0	0	0	0	0	0	0	0	0	0	0	0	0	0	0	0	0	0	0	0	0	0	0	0
K11442	0	0	0	0	0	0	0	0	0	0	0	0	0	0	0	0	0	0	0	0	0	0	0	0	0	0	0	0	0	0	0	0	0	0	0	0	0	0	0	0	0	0	0	0	0	0	0	0	0
K10240	0	0	0	0	0	0	0	0	0	0	0	0	0	0	0	0	0	0	0	0	0	0	0	0	0	0	0	0	0	0	0	0	0	0	0	0	0	0	0	0	0	0	0	0	0	0	0	0	0
K10241	0	0	0	0	0	0	0	0	0	0	0	0	0	0	0	0	0	0	0	0	0	0	0	0	0	0	0	0	0	0	0	0	0	0	0	0	0	0	0	0	0	0	0	0	0	0	0	0	0
K04110	0.396933	-0.100556	-0.0378262	0.14214	0.492952	0.0325107	0.169358	0.12097	0.0438516	0.26311	0.188259	0.0551925	0.411298	0.272182	0.131555	0.278987	0.0778744	0.220014	-0.0937517	-0.0748501	0.155749	-0.0438516	0.218502	-0.23816	0.217779	0.207917	-0.0317546	0.105093	0.331155	-0.133067	0.244964	0.202625	0.153481	0.322082	0.339472	-0.0551925	0.173138	0.540584	0.41659	0.227575	0.350057	0.282767	0.0287479	0.181455	0.0438516	0.532268	0.363666	0.539072	0.588972
K09934	0	0	0	0	0	0	0	0	0	0	0	0	0	0	0	0	0	0	0	0	0	0	0	0	0	0	0	0	0	0	0	0	0	0	0	0	0	0	0	0	0	0	0	0	0	0	0	0	0
K06216	0	0	0	0	0	0	0	0	0	0	0	0	0	0	0	0	0	0	0	0	0	0	0	0	0	0	0	0	0	0	0	0	0	0	0	0	0	0	0	0	0	0	0	0	0	0	0	0	0
K01707	0	0	0	0	0.44996	0	0	0	0	0	0	0	0	0	0	0	0	0	0	0	0	0	0	0	0	0	0	0	0	0	0	0	0	0	0	0	0	0.572544	0.407037	0	0	0	0	0	0	0.474695	0	0.494701	0.517254
K14166	0	0	0	0	0	0	0	0	0	0	0	0	0	0	0	0	0	0	0	0	0	0	0	0	0	0	0	0	0	0	0	0	0	0	0	0	0	0	0	0	0	0	0	0	0	0	0	0	0
K06860	0	0	0	0	0	0	0	0	0	0	0	0	0	0	0	0	0	0	0	0	0	0	0	0	0	0	0	0	0	0	0	0	0	0	0	0	0	0	0	0	0	0	0	0	0	0	0	0	0
K13686	0	0	0	0	0	0	0	0	0	0	0	0	0	0	0	0	0	0	0	0	0	0	0	0	0	0	0	0	0	0	0	0	0	0	0	0	0	0	0	0	0	0	0	0	0	0	0	0	0
K14159	0	0	0	0	0	0	0	0	0	0	0	0	0	0	0	0	0	0	0	0	0	0	0	0	0	0	0	0	0	0	0	0	0	0	0	0	0	0	0	0	0	0	0	0	0	0	0	0	0
K13531	0	0	0	0	0	0	0	0	0	0	0	0	0	0	0	0	0	0	0	0	0	0	0	0	0	0	0	0	0	0	0	0	0	0	0	0	0	0	0	0	0	0	0	0	0	0	0	0	0
K13530	0	0	0	0	0	0	0	0	0	0	0	0	0	0	0	0	0	0	0	0	0	0	0	0	0	0	0	0	0	0	0	0	0	0	0	0	0	0	0	0	0	0	0	0	0	0	0	0	0
K14060	0	0	0	0	0	0	0	0	0	0	0	0	0	0	0	0	0	0	0	0	0	0	0	0	0	0	0	0	0	0	0	0	0	0	0	0	0	0	0	0	0	0	0	0	0	0	0	0	0
K00693	0	0	0	0	0	0	0	0	0	0	0	0	0	0	0	0	0	0	0	0	0	0	0	0	0	0	0	0	0	0	0	0	0	0	0	0	0	0	0	0	0	0	0	0	0	0	0	0	0
K10228	0.294275	-0.246987	-0.193998	0	0.403036	0	0.161142	0	0	0.40631	0	0	0.320101	0.416859	0	0.42086	0	0.168417	-0.254626	-0.192424	0.180057	-0.164415	0.311007	-0.395397	0.195364	0.281907	0	0	0.416495	0	0	0	0	0.201882	0.431409	-0.168053	0	0.515435	0.523438	0.315372	0.231709	0.415404	0.1667	0.26372	0	0.630017	0.305187	0.557994	0.649659
K10229	0.294275	-0.246987	-0.193998	0	0.403036	0	0.161142	0	0	0.40631	0	0	0.320101	0.416859	0	0.42086	0	0.168417	-0.254626	-0.192424	0.180057	-0.164415	0.311007	-0.395397	0.195364	0.281907	0	0	0.416495	0	0	0	0	0.201882	0.431409	-0.168053	0	0.515435	0.523438	0.315372	0.231709	0.415404	0.1667	0.26372	0	0.630017	0.305187	0.557994	0.649659
K10227	0.287727	-0.26081	0	0	0.396489	0	0	0	0	0.399762	0	0	0.312826	0.399399	0	0.409947	0	0	-0.266266	0	0	0	0.299367	-0.40922	0	0.273177	0	0	0.407765	0	0	0	0	0	0.418314	0	0	0.51398	0.51107	0.314645	0	0.412494	0	0.270267	0	0.632199	0.318282	0.566724	0.650387
K08164	0	0	0	0	0	0	0	0	0	0	0	0	0	0	0	0	0	0	0	0	0	0	0	0	0	0	0	0	0	0	0	0	0	0	0	0	0	0	0	0	0	0	0	0	0	0	0	0	0
K02497	0	0	0	0	0	0	0	0	0	0	0	0	0	0	0	0	0	0	0	0	0	0	0	0	0	0	0	0	0	0	0	0	0	0	0	0	0	0	0	0	0	0	0	0	0	0	0	0	0
K02234	0.386348	0	0	0.189016	0.479343	0	0.204137	0	0	0.301669	0	0	0.449101	0.282011	0	0.316034	0	0.247988	0	0	0.231355	0	0.237403	-0.260085	0.241977	0.247232	0	0	0.339472	0	0.235891	0.198088	0	0.338716	0.318302	0	0	0.536804	0.399201	0.229087	0.310741	0.291084	0	0	0	0.53378	0.344008	0.529243	0.584436
K11898	0.396933	0	0	0.181455	0.489928	0	0.190528	0.150456	0	0.292596	0.179187	0	0.44154	0.274451	0.165578	0.308473	0	0.246476	0	0	0.201112	0	0.238916	-0.251013	0.228366	0.215478	0	0	0.353081	-0.130043	0.255549	0.210185	0.130043	0.346276	0.330399	0	0.176919	0.54134	0.409786	0.248744	0.347032	0.292596	0	0.185991	0	0.539828	0.359129	0.532268	0.582924
K11897	0.396177	-0.102068	-0.0522002	0.171626	0.485392	0.0143652	0.187503	0.1497	0.0378031	0.290328	0.168602	0.0665335	0.440028	0.276719	0.161797	0.307717	0.0514122	0.24194	-0.0884593	-0.0430955	0.213966	-0.0378031	0.235891	-0.250257	0.227609	0.217746	-0.0408273	0.0801426	0.344008	-0.139871	0.2495	0.198844	0.114921	0.338716	0.319814	-0.0635092	0.172382	0.535292	0.403737	0.240428	0.330399	0.28806	0.0597654	0.176162	0.036291	0.533024	0.350813	0.529243	0.581412
K04337	0.075537	-0.025179	-0.0755831	0.226611	0.176253	0.176253	0.276969	-0.201432	0.075537	0.201432	0.050358	-0.201432	0.276969	0.176253	0.025179	0.176253	-0.176253	0.226611	-0.276969	-0.125895	-0.151074	0.125895	0.226611	-0.25179	0.125914	0.226611	0.327327	0.327327	0.302148	0.025179	0.050358	0.302148	0.25179	0.276969	0.276969	-0.151074	-0.125895	0.302148	0.25179	0.151074	0.25179	0.276969	0.125972	0.327327	0.226611	0.327327	0.302148	0.327327	0.302148
K10208	0	0	0	0	0	0	0	0	0	0	0	0	0	0	0	0	0	0	0	0	0	0	0	0	0	0	0	0	0	0	0	0	0	0	0	0	0	0	0	0	0	0	0	0	0	0	0	0	0
K10209	0	0	0	0	0	0	0	0	0	0	0	0	0	0	0	0	0	0	0	0	0	0	0	0	0	0	0	0	0	0	0	0	0	0	0	0	0	0	0	0	0	0	0	0	0	0	0	0	0
K00217	0	0	0	0	0	0	0	0	0	0	0	0	0	0	0	0	0	0	0	0	0	0	0	0	0	0	0	0	0	0	0	0	0	0	0	0	0	0	0	0	0	0	0	0	0	0	0	0	0
K13472	0.075537	-0.025179	-0.0755831	0.226611	0.176253	0.176253	0.276969	-0.201432	0.075537	0.201432	0.050358	-0.201432	0.276969	0.176253	0.025179	0.176253	-0.176253	0.226611	-0.276969	-0.125895	-0.151074	0.125895	0.226611	-0.25179	0.125914	0.226611	0.327327	0.327327	0.302148	0.025179	0.050358	0.302148	0.25179	0.276969	0.276969	-0.151074	-0.125895	0.302148	0.25179	0.151074	0.25179	0.276969	0.125972	0.327327	0.226611	0.327327	0.302148	0.327327	0.302148
K06026	0	0	0	0	0	0	0	0	0	0	0	0	0	0	0	0	0	0	0	0	0	0	0	0	0	0	0	0	0	0	0	0	0	0	0	0	0	0	0	0	0	0	0	0	0	0	0	0	0
K09744	0	0	0	0	0	0	0	0	0	0	0	0	0	0	0	0	0	0	0	0	0	0	0	0	0	0	0	0	0	0	0	0	0	0	0	0	0	0	0	0	0	0	0	0	0	0	0	0	0
K06351	0	0	0	0	0	0	0	0	0	0	0	0	0	0	0	0	0	0	0	0	0	0	0	0	0	0	0	0	0	0	0	0	0	0	0	0	0	0	0	0	0	0	0	0	0	0	0	0	0
K14338	0	0	0	0	0	0	0	0	0	0	0	0	0	0	0	0	0	0	0	0	0	0	0	0	0	0	0	0	0	0	0	0	0	0	0	0	0	0	0	0	0	0	0	0	0	0	0	0	0
K14339	0	0	0	0	0	0	0	0	0	0	0	0	0	0	0	0	0	0	0	0	0	0	0	0	0	0	0	0	0	0	0	0	0	0	0	0	0	0	0	0	0	0	0	0	0	0	0	0	0
K14335	0	0	0	0	0	0	0	0	0	0	0	0	0	0	0	0	0	0	0	0	0	0	0	0	0	0	0	0	0	0	0	0	0	0	0	0	0	0	0	0	0	0	0	0	0	0	0	0	0
K14337	0	0	0	0	0	0	0	0	0	0	0	0	0	0	0	0	0	0	0	0	0	0	0	0	0	0	0	0	0	0	0	0	0	0	0	0	0	0	0	0	0	0	0	0	0	0	0	0	0
K14333	0	0	0	0	0	0	0	0	0	0	0	0	0	0	0	0	0	0	0	0	0	0	0	0	0	0	0	0	0	0	0	0	0	0	0	0	0	0	0	0	0	0	0	0	0	0	0	0	0
K08280	0	0	0	0	0	0	0	0	0	0	0	0	0	0	0	0	0	0	0	0	0	0	0	0	0	0	0	0	0	0	0	0	0	0	0	0	0	0	0	0	0	0	0	0	0	0	0	0	0
K12993	0	0	0	0	0	0	0	0	0	0	0	0	0	0	0	0	0	0	0	0	0	0	0	0	0	0	0	0	0	0	0	0	0	0	0	0	0	0	0	0	0	0	0	0	0	0	0	0	0
K12991	0	0	0	0	0	0	0	0	0	0	0	0	0	0	0	0	0	0	0	0	0	0	0	0	0	0	0	0	0	0	0	0	0	0	0	0	0	0	0	0	0	0	0	0	0	0	0	0	0
K12994	0.385592	-0.10358	-0.0529567	0.191284	0.482368	0.0196576	0.181455	0.138359	0.0355349	0.292596	0.173138	0.0453637	0.439272	0.257817	0.160285	0.301669	0.0317546	0.246476	-0.108873	-0.0514122	0.202625	-0.0204137	0.229087	-0.27067	0.245758	0.220014	-0.0105849	0.0929956	0.346276	-0.139871	0.244208	0.208673	0.119458	0.346276	0.321326	-0.0808986	0.164065	0.543609	0.397689	0.246476	0.337204	0.293352	0.0748959	0.198088	0.0461198	0.545877	0.373495	0.542853	0.585948
K01906	0	0	0	0	0	0	0	0	0	0	0	0	0	0	0	0	0	0	0	0	0	0	0	0	0	0	0	0	0	0	0	0	0	0	0	0	0	0	0	0	0	0	0	0	0	0	0	0	0
K06597	0	0	0	0	0	0	0	0	0	0	0	0	0	0	0	0	0	0	0	0	0	0	0	0	0	0	0	0	0	0	0	0	0	0	0	0	0	0	0	0	0	0	0	0	0	0	0	0	0
K14585	0.396933	0	0	0.181455	0.489928	0	0.190528	0.150456	0	0.292596	0.179187	0	0.44154	0.274451	0.165578	0.308473	0	0.246476	0	0	0.201112	0	0.238916	-0.251013	0.228366	0.215478	0	0	0.353081	-0.130043	0.255549	0.210185	0.130043	0.346276	0.330399	0	0.176919	0.54134	0.409786	0.248744	0.347032	0.292596	0	0.185991	0	0.539828	0.359129	0.532268	0.582924
K14582	0	0	0	0	0	0	0	0	0	0	0	0	0	0	0	0	0	0	0	0	0	0	0	0	0	0	0	0	0	0	0	0	0	0	0	0	0	0	0	0	0	0	0	0	0	0	0	0	0
K10019	0	0	0	0	0	0	0	0	0	0	0	0	0	0	0	0	0	0	0	0	0	0	0	0	0	0	0	0	0	0	0	0	0	0	0	0	0	0	0	0	0	0	0	0	0	0	0	0	0
K01461	0	0	0	0	0	0	0	0	0	0	0	0	0	0	0	0	0	0	0	0	0	0	0	0	0	0	0	0	0	0	0	0	0	0	0	0	0	0	0	0	0	0	0	0	0	0	0	0	0
K05549	0	0	0	0	0	0	0	0	0	0	0	0	0	0	0	0	0	0	0	0	0	0	0	0	0	0	0	0	0	0	0	0	0	0	0	0	0	0	0	0	0	0	0	0	0	0	0	0	0
K05548	0.075537	-0.025179	-0.0755831	0.226611	0.176253	0.176253	0.276969	-0.201432	0.075537	0.201432	0.050358	-0.201432	0.276969	0.176253	0.025179	0.176253	-0.176253	0.226611	-0.276969	-0.125895	-0.151074	0.125895	0.226611	-0.25179	0.125914	0.226611	0.327327	0.327327	0.302148	0.025179	0.050358	0.302148	0.25179	0.276969	0.276969	-0.151074	-0.125895	0.302148	0.25179	0.151074	0.25179	0.276969	0.125972	0.327327	0.226611	0.327327	0.302148	0.327327	0.302148
K11629	0	0	0	0	0	0	0	0	0	0	0	0	0	0	0	0	0	0	0	0	0	0	0	0	0	0	0	0	0	0	0	0	0	0	0	0	0	0	0	0	0	0	0	0	0	0	0	0	0
K09925	0.396933	0	0	0.181455	0.489928	0	0.190528	0.150456	0	0.292596	0.179187	0	0.44154	0.274451	0.165578	0.308473	0	0.246476	0	0	0.201112	0	0.238916	-0.251013	0.228366	0.215478	0	0	0.353081	-0.130043	0.255549	0.210185	0.130043	0.346276	0.330399	0	0.176919	0.54134	0.409786	0.248744	0.347032	0.292596	0	0.185991	0	0.539828	0.359129	0.532268	0.582924
K10716	0	0	0	0	0	0	0	0	0	0	0	0	0	0	0	0	0	0	0	0	0	0	0	0	0	0	0	0	0	0	0	0	0	0	0	0	0	0	0	0	0	0	0	0	0	0	0	0	0
K10715	0	0	0	0	0	0	0	0	0	0	0	0	0	0	0	0	0	0	0	0	0	0	0	0	0	0	0	0	0	0	0	0	0	0	0	0	0	0	0	0	0	0	0	0	0	0	0	0	0
K07785	0	0	0	0	0	0	0	0	0	0	0	0	0	0	0	0	0	0	0	0	0	0	0	0	0	0	0	0	0	0	0	0	0	0	0	0	0	0	0	0	0	0	0	0	0	0	0	0	0
K14661	0	0	0	0	0	0	0	0	0	0	0	0	0	0	0	0	0	0	0	0	0	0	0	0	0	0	0	0	0	0	0	0	0	0	0	0	0	0	0	0	0	0	0	0	0	0	0	0	0
K00785	0.201432	0.327327	0.327527	0.327327	0.276969	0.327327	0.327327	0.327327	0.327327	0.327327	0.327327	0.327327	0.327327	0.302148	0.327327	0.327327	0.327327	0.327327	0.327327	0.25179	0.25179	0.327327	0.327327	0.327327	0	0.327327	-0.25179	0.176253	0.327327	0	0.276969	0.276969	0.151074	0.176253	0.327327	0	0.327327	0.327327	0.302148	0.327327	0.327327	0.327327	0	0	0	0.151074	-0.25179	0	0
K00035	0	0	0	0	0	0	0	0	0	0	0	0	0	0	0	0	0	0	0	0	0	0	0	0	0	0	0	0	0	0	0	0	0	0	0	0	0	0	0	0	0	0	0	0	0	0	0	0	0
K00256	0.385592	-0.10358	-0.0529567	0.191284	0.482368	0.0196576	0.181455	0.138359	0.0355349	0.292596	0.173138	0.0453637	0.439272	0.257817	0.160285	0.301669	0.0317546	0.246476	-0.108873	-0.0514122	0.202625	-0.0204137	0.229087	-0.27067	0.245758	0.220014	-0.0105849	0.0929956	0.346276	-0.139871	0.244208	0.208673	0.119458	0.346276	0.321326	-0.0808986	0.164065	0.543609	0.397689	0.246476	0.337204	0.293352	0.0748959	0.198088	0.0461198	0.545877	0.373495	0.542853	0.585948
K02250	0	0	0	0	0	0	0	0	0	0	0	0	0	0	0	0	0	0	0	0	0	0	0	0	0	0	0	0	0	0	0	0	0	0	0	0	0	0	0	0	0	0	0	0	0	0	0	0	0
K03124	0	0	0	0	0	0	0	0	0	0	0	0	0	0	0	0	0	0	0	0	0	0	0	0	0	0	0	0	0	0	0	0	0	0	0	0	0	0	0	0	0	0	0	0	0	0	0	0	0
K11387	0	0	0	0	0	0	0	0	0	0	0	0	0	0	0	0	0	0	0	0	0	0	0	0	0	0	0	0	0	0	0	0	0	0	0	0	0	0	0	0	0	0	0	0	0	0	0	0	0
K11383	0	0	0	0	0	0	0	0	0	0	0	0	0	0	0	0	0	0	0	0	0	0	0	0	0	0	0	0	0	0	0	0	0	0	0	0	0	0	0	0	0	0	0	0	0	0	0	0	0
K11949	0.396933	0	0	0.181455	0.489928	0	0.190528	0.150456	0	0.292596	0.179187	0	0.44154	0.274451	0.165578	0.308473	0	0.246476	0	0	0.201112	0	0.238916	-0.251013	0.228366	0.215478	0	0	0.353081	-0.130043	0.255549	0.210185	0.130043	0.346276	0.330399	0	0.176919	0.54134	0.409786	0.248744	0.347032	0.292596	0	0.185991	0	0.539828	0.359129	0.532268	0.582924
K07044	0	0	0	0	0	0	0	0	0	0	0	0	0	0	0	0	0	0	0	0	0	0	0	0	0	0	0	0	0	0	0	0	0	0	0	0	0	0	0	0	0	0	0	0	0	0	0	0	0
K05784	0	0	0	0	0	0	0	0	0	0	0	0	0	0	0	0	0	0	0	0	0	0	0	0	0	0	0	0	0	0	0	0	0	0	0	0	0	0	0	0	0	0	0	0	0	0	0	0	0
K03339	0	0	0	0	0	0	0	0	0	0	0	0	0	0	0	0	0	0	0	0	0	0	0	0	0	0	0	0	0	0	0	0	0	0	0	0	0	0	0	0	0	0	0	0	0	0	0	0	0
K03333	0	0	0	0	0	0	0	0	0	0	0	0	0	0	0	0	0	0	0	0	0	0	0	0	0	0	0	0	0	0	0	0	0	0	0	0	0	0	0	0	0	0	0	0	0	0	0	0	0
K10552	0	0	0	0	0	0	0	0	0	0	0	0	0	0	0	0	0	0	0	0	0	0	0	0	0	0	0	0	0	0	0	0	0	0	0	0	0	0	0	0	0	0	0	0	0	0	0	0	0
K10553	0	0	0	0	0	0	0	0	0	0	0	0	0	0	0	0	0	0	0	0	0	0	0	0	0	0	0	0	0	0	0	0	0	0	0	0	0	0	0	0	0	0	0	0	0	0	0	0	0
K10554	0	0	0	0	0	0	0	0	0	0	0	0	0	0	0	0	0	0	0	0	0	0	0	0	0	0	0	0	0	0	0	0	0	0	0	0	0	0	0	0	0	0	0	0	0	0	0	0	0
K07231	0.386348	-0.108117	-0.0453914	0.1497	0.482368	0.0234379	0.182967	0.0967759	0.0317546	0.272182	0.168602	0.0309985	0.418858	0.279743	0.122482	0.286548	0.0551925	0.221526	-0.113409	-0.0839229	0.185991	-0.0468758	0.21699	-0.247232	0.23139	0.239672	-0.0665335	0.0718259	0.317546	-0.163309	0.225306	0.190528	0.118702	0.314522	0.327375	-0.0899714	0.141384	0.536048	0.406005	0.207917	0.313766	0.281255	0.0514436	0.172382	0.0211697	0.526219	0.348545	0.536048	0.590484
K07230	0	0	0	0	0	0	0	0	0	0	0	0	0	0	0	0	0	0	0	0	0	0	0	0	0	0	0	0	0	0	0	0	0	0	0	0	0	0	0	0	0	0	0	0	0	0	0	0	0
K00011	0	0	0	0	0	0	0	0	0	0	0	0	0	0	0	0	0	0	0	0	0	0	0	0	0	0	0	0	0	0	0	0	0	0	0	0	0	0	0	0	0	0	0	0	0	0	0	0	0
K08253	0	0	0	0	0	0	0	0	0	0	0	0	0	0	0	0	0	0	0	0	0	0	0	0	0	0	0	0	0	0	0	0	0	0	0	0	0	0	0	0	0	0	0	0	0	0	0	0	0
K08255	0	0	0	0	0	0	0	0	0	0	0	0	0	0	0	0	0	0	0	0	0	0	0	0	0	0	0	0	0	0	0	0	0	0	0	0	0	0	0	0	0	0	0	0	0	0	0	0	0
K01274	0	0	0	0	0	0	0	0	0	0	0	0	0	0	0	0	0	0	0	0	0	0	0	0	0	0	0	0	0	0	0	0	0	0	0	0	0	0	0	0	0	0	0	0	0	0	0	0	0
K12541	0	0	0	0	0	0	0	0	0	0	0	0	0	0	0	0	0	0	0	0	0	0	0	0	0	0	0	0	0	0	0	0	0	0	0	0	0	0	0	0	0	0	0	0	0	0	0	0	0
K12543	0	0	0	0	0	0	0	0	0	0	0	0	0	0	0	0	0	0	0	0	0	0	0	0	0	0	0	0	0	0	0	0	0	0	0	0	0	0	0	0	0	0	0	0	0	0	0	0	0
K12542	0	0	0	0	0	0	0	0	0	0	0	0	0	0	0	0	0	0	0	0	0	0	0	0	0	0	0	0	0	0	0	0	0	0	0	0	0	0	0	0	0	0	0	0	0	0	0	0	0
K12549	0	0	0	0	0	0	0	0	0	0	0	0	0	0	0	0	0	0	0	0	0	0	0	0	0	0	0	0	0	0	0	0	0	0	0	0	0	0	0	0	0	0	0	0	0	0	0	0	0
K11016	0	0	0	0	0	0	0	0	0	0	0	0	0	0	0	0	0	0	0	0	0	0	0	0	0	0	0	0	0	0	0	0	0	0	0	0	0	0	0	0	0	0	0	0	0	0	0	0	0
K11017	0	0	0	0	0	0	0	0	0	0	0	0	0	0	0	0	0	0	0	0	0	0	0	0	0	0	0	0	0	0	0	0	0	0	0	0	0	0	0	0	0	0	0	0	0	0	0	0	0
K11014	0	0	0	0	0	0	0	-0.371997	0	0	0	-0.416583	0	0	0	0	0	0	0	0	0	0	0	0	0	0	0	-0.402622	-0.522418	0	0	-0.386409	0	-0.416583	0	0	0	0	0	0	-0.435948	0	0	0	0	0	0	0	0
K11015	0	0	0	0	0	0	0	-0.371997	0	0	0	-0.416583	0	0	0	0	0	0	0	0	0	0	0	0	0	0	0	-0.402622	-0.522418	0	0	-0.386409	0	-0.416583	0	0	0	-0.360738	0	0	-0.435948	0	0	0	0	0	0	0	0
K11013	0	0	0	0	0	0	0	-0.371997	0	0	0	-0.416583	0	0	0	0	0	0	0	0	0	0	0	0	0	0	0	-0.402622	-0.522418	0	0	-0.386409	0	-0.416583	0	0	0	-0.360738	0	0	-0.435948	0	0	0	0	0	0	0	0
K06882	0	0	0	0	0	0	0	-0.371997	0	0	0	-0.416583	0	0	0	0	0	0	0	0	0	0	0	0	0	0	0	-0.402622	-0.522418	0	0	-0.386409	0	-0.416583	0	0	0	-0.360738	0	0	-0.435948	0	0	0	0	0	0	0	0
K06887	0	0	0	0	0	0	0	0	0	0	0	0	0	0	0	0	0	0	0	0	0	0	0	0	0	0	0	0	0	0	0	0	0	0	0	0	0	0	0	0	0	0	0	0	0	0	0	0	0
K00485	0	0	0	0	0	0	0	0	0	0	0	0	0	0	0	0	0	0	0	0	0	0	0	0	0	0	0	0	0	0	0	0	0	0	0	0	0	0	0	0	0	0	0	0	0	0	0	0	0
K07681	0	0	0	0	0	0	0	0	0	0	0	0	0	0	0	0	0	0	0	0	0	0	0	0	0	0	0	0	0	0	0	0	0	0	0	0	0	0	0	0	0	0	0	0	0	0	0	0	0
K04016	0	-0.179733	-0.129447	-0.0780159	0.069128	-0.192571	0.145169	-0.170845	-0.222197	0.316014	-0.209359	-0.111592	0.128381	0.390079	-0.0780159	0.400942	-0.12048	0.092829	-0.12048	-0.230097	0.390079	-0.210347	0.363416	-0.102704	-0.0622247	0.451307	-0.315026	-0.0632027	0.226147	-0.303176	-0.134306	-0.0780159	-0.197509	-0.109617	0.255774	-0.232073	-0.207384	0.198496	0.303176	0.11258	-0.0997418	0.307126	0.181819	0	-0.192571	0.236023	-0.265649	0	0.247873
K07064	0	0	0	0	0	0	0	0	0	0	0	0	0	0	0	0	0	0	0	0	0	0	0	0	0	0	0	0	0	0	0	0	0	0	0	0	0	0	0	0	0	0	0	0	0	0	0	0	0
K01121	0	0	0	0	0	0	0	-0.371997	0	0	0	-0.416583	0	0	0	0	0	0	0	0	0	0	0	0	0	0	0	-0.402622	-0.522418	0	0	-0.386409	0	-0.416583	0	0	0	0	0	0	-0.435948	0	0	0	0	0	0	0	0
K13623	0	0	0	0	0	0	0	0	0	0	0	0	0	0	0	0	0	0	0	0	0	0	0	0	0	0	0	0	0	0	0	0	0	0	0	0	0	0	0	0	0	0	0	0	0	0	0	0	0
K12976	0	0	0	0	0	0	0	0	0	0	0	0	0	0	0	0	0	0	0	0	0	0	0	0	0	0	0	0	0	0	0	0	0	0	0	0	0	0	0	0	0	0	0	0	0	0	0	0	0
K14750	0.396933	0	0	0.181455	0.489928	0	0.190528	0.150456	0	0.292596	0.179187	0	0.44154	0.274451	0.165578	0.308473	0	0.246476	0	0	0.201112	0	0.238916	-0.251013	0.228366	0.215478	0	0	0.353081	-0.130043	0.255549	0.210185	0.130043	0.346276	0.330399	0	0.176919	0.54134	0.409786	0.248744	0.347032	0.292596	0	0.185991	0	0.539828	0.359129	0.532268	0.582924
K14751	0.396933	0	0	0.181455	0.489928	0	0.190528	0.150456	0	0.292596	0.179187	0	0.44154	0.274451	0.165578	0.308473	0	0.246476	0	0	0.201112	0	0.238916	-0.251013	0.228366	0.215478	0	0	0.353081	-0.130043	0.255549	0.210185	0.130043	0.346276	0.330399	0	0.176919	0.54134	0.409786	0.248744	0.347032	0.292596	0	0.185991	0	0.539828	0.359129	0.532268	0.582924
K00154	0.41795	0	0	0	0.546354	0	0	0	0	0	0	0	0.330286	0	0	0	0	0	0	0	0	0	0	-0.29573	0.298321	0.281907	0	0	0.424134	0	0.299003	0.26954	0	0.387395	0	0	0	0.435046	0.28409	0	0	0.282998	0	0.29573	0	0.533259	0.442685	0.589277	0.562723
K10533	0	0	0	0	0	0	0	0	0	0	0	0	0	0	0	0	0	0	0	0	0	0	0	0	0	0	0	0	0	0	0	0	0	0	0	0	0	0	0	0	0	0	0	0	0	0	0	0	0
K00293	0	0	0	0	0	0	0	0	0	0	0	0	0	0	0	0	0	0	0	0	0	0	0	0	0	0	0	0	0	0	0	0	0	0	0	0	0	0	0	0	0	0	0	0	0	0	0	0	0
K03921	0	0	0	0	0	0	0	0	0	0	0	0	0	0	0	0	0	0	0	0	0	0	0	0	0	0	0	0	0	0	0	0	0	0	0	0	0	0	0	0	0	0	0	0	0	0	0	0	0
K05523	0	0	0	0	0	0	0	0	0	0.491796	0	0	0	0.559937	0	0.490809	0	0	0	0	0	0	0.446369	0	0	0.491796	0	0	0.438469	0	0	0	0	0	0.445382	0	0	0	0.498709	0	0	0.548086	0	0	0	0.465133	0	0	0.448344
K03379	0	0	0	0	0	0	0	0	0	0	0	0	0	0	0	0	0	0	0	0	0	0	0	0	0	0	0	0	0	0	0	0	0	0	0	0	0	0	0	0	0	0	0	0	0	0	0	0	0
K11930	0	0	0	0	0	0	0	0	0	0	0	0	0	0	0	0	0	0	0	0	0	0	0	0	0	0	0	0	0	0	0	0	0	0	0	0	0	0	0	0	0	0	0	0	0	0	0	0	0
K11935	0.075537	-0.025179	-0.0755831	0.226611	0.176253	0.176253	0.276969	-0.201432	0.075537	0.201432	0.050358	-0.201432	0.276969	0.176253	0.025179	0.176253	-0.176253	0.226611	-0.276969	-0.125895	-0.151074	0.125895	0.226611	-0.25179	0.125914	0.226611	0.327327	0.327327	0.302148	0.025179	0.050358	0.302148	0.25179	0.276969	0.276969	-0.151074	-0.125895	0.302148	0.25179	0.151074	0.25179	0.276969	0.125972	0.327327	0.226611	0.327327	0.302148	0.327327	0.302148
K11937	0	0	0	0	0	0	0	0	0	0	0	0	0	0	0	0	0	0	0	0	0	0	0	0	0	0	0	0	0	0	0	0	0	0	0	0	0	0	0	0	0	0	0	0	0	0	0	0	0
K11936	0	0	0	0	0	0	0	0	0	0	0	0	0	0	0	0	0	0	0	0	0	0	0	0	0	0	0	0	0	0	0	0	0	0	0	0	0	0	0	0	0	0	0	0	0	0	0	0	0
K02480	0.396933	0	0	0.181455	0.489928	0	0.190528	0.150456	0	0.292596	0.179187	0	0.44154	0.274451	0.165578	0.308473	0	0.246476	0	0	0.201112	0	0.238916	-0.251013	0.228366	0.215478	0	0	0.353081	-0.130043	0.255549	0.210185	0.130043	0.346276	0.330399	0	0.176919	0.54134	0.409786	0.248744	0.347032	0.292596	0	0.185991	0	0.539828	0.359129	0.532268	0.582924
K02487	0	0	0	0	0	0	0	0	0	0	0	0	0	0	0	0	0	0	0	0	0	0	0	0	0	0	0	0	0	0	0	0	0	0	0	0	0	0	0	0	0	0	0	0	0	0	0	0	0
K08605	0	0	0	0	0	0	0	0	0	0	0	0	0	0	0	0	0	0	0	0	0	0	0	0	0	0	0	0	0	0	0	0	0	0	0	0	0	0	0	0	0	0	0	0	0	0	0	0	0
K09950	0.326191	0	0	0	0.321964	0	0	0	0	0	0	0	0.340281	0	0	0	0	0	0	0	0	0	0	0	0	0	0	0	0.535432	0	0.429754	0.495274	0.423414	0.527682	0	-0.323373	0	0.400165	0	0	0	0.42905	0.295372	0.568544	0	0	0	0.328304	0.299419
K14189	0	0	0	0	0	0	0	0	0	0	0	0	0	0	0	0	0	0	0	0	0	0	0	0	0	0	0	0	0	0	0	0	0	0	0	0	0	0	0	0	0	0	0	0	0	0	0	0	0
K02763	0	0	0	0	0	0	0	0	0	0	0	0	0	0	0	0	0	0	0	0	0	0	0	0	0	0	0	0	0	0	0	0	0	0	0	0	0	0	0	0	0	0	0	0	0	0	0	0	0
K00947	0	0	0	0	0	0	0	0	0	0	0	0	0	0	0	0	0	0	0	0	0	0	0	0	0	0	0	0	0	0	0	0	0	0	0	0	0	0	0	0	0	0	0	0	0	0	0	0	0
K07647	0	0	0	0	0	0	0	0	0	0	0	0	0	0	0	0	0	0	0	0	0	0	0	0	0	0	0	0	0	0	0	0	0	0	0	0	0	0	0	0	0	0	0	0	0	0	0	0	0
K07020	0	0	0	0	0	0	0	0	0	0	0	0	0	0	0	0	0	0	0	0	0	0	0	0	0	0	0	0	0	0	0	0	0	0	0	0	0	0	0	0	0	0	0	0	0	0	0	0	0
K01170	0	0	0	0	0	0	0	0	0	0	0	0	0	0	0	0	0	0	0	0	0	0	0	0	0	0	0	0	0	0	0	0	0	0	0	0	0	0	0	0	0	0	0	0	0	0	0	0	0
K14578	0	0	0	0	0	0	0	0	0	0	0	0	0	0	0	0	0	0	0	0	0	0	0	0	0	0	0	0	0	0	0	0	0	0	0	0	0	0	0	0	0	0	0	0	0	0	0	0	0
K14579	0.396933	0	0	0.181455	0.489928	0	0.190528	0.150456	0	0.292596	0.179187	0	0.44154	0.274451	0.165578	0.308473	0	0.246476	0	0	0.201112	0	0.238916	-0.251013	0.228366	0.215478	0	0	0.353081	-0.130043	0.255549	0.210185	0.130043	0.346276	0.330399	0	0.176919	0.54134	0.409786	0.248744	0.347032	0.292596	0	0.185991	0	0.539828	0.359129	0.532268	0.582924
K11919	0	0	0	0	0	0	0	0	0	0	0	0	0	0	0	0	0	0	0	0	0	0	0	0	0	0	0	0	0	0	0	0	0	0	0	0	0	0	0	0	0	0	0	0	0	0	0	0	0
K11918	0	0	0	0	0	0	0	0	0	0	0	0	0	0	0	0	0	0	0	0	0	0	0	0	0	0	0	0	0	0	0	0	0	0	0	0	0	0	0	0	0	0	0	0	0	0	0	0	0
K12062	0	0	0	0	0.44996	0	0	0	0	0	0	0	0	0	0	0	0	0	0	0	0	0	0	0	0	0	0	0	0	0	0	0	0	0	0	0	0	0.572544	0.407037	0	0	0	0	0	0	0.474695	0	0.494701	0.517254
K12064	0	0	0	0	0.44996	0	0	0	0	0	0	0	0	0	0	0	0	0	0	0	0	0	0	0	0	0	0	0	0	0	0	0	0	0	0	0	0	0.572544	0.407037	0	0	0	0	0	0	0.474695	0	0.494701	0.517254
K12065	0	0	0	0	0.44996	0	0	0	0	0	0	0	0	0	0	0	0	0	0	0	0	0	0	0	0	0	0	0	0	0	0	0	0	0	0	0	0	0.572544	0.407037	0	0	0	0	0	0	0.474695	0	0.494701	0.517254
K07256	0.396177	-0.102068	-0.0522002	0.171626	0.485392	0.0143652	0.187503	0.1497	0.0378031	0.290328	0.168602	0.0665335	0.440028	0.276719	0.161797	0.307717	0.0514122	0.24194	-0.0884593	-0.0430955	0.213966	-0.0378031	0.235891	-0.250257	0.227609	0.217746	-0.0408273	0.0801426	0.344008	-0.139871	0.2495	0.198844	0.114921	0.338716	0.319814	-0.0635092	0.172382	0.535292	0.403737	0.240428	0.330399	0.28806	0.0597654	0.176162	0.036291	0.533024	0.350813	0.529243	0.581412
K01617	0	0	0	0	0.440503	0	0	0	0	0	0	0	0	0	0	0	0	0	0	0	0	0	0	0	0	0	0	0	0	0	0	0	0	0	0	0	0	0.564542	0	0	0	0	0	0	0	0.465238	0	0.490336	0.516526
K05281	0	0	0	0	0	0	0	0	0	0	0	0	0	0	0	0	0	0	0	0	0	0	0	0	0	0	0	0	0	0	0	0	0	0	0	0	0	0	0	0	0	0	0	0	0	0	0	0	0
K09709	0.396933	0	0	0	0.492952	0	0	0	0	0.26311	0.188259	0	0.411298	0.272182	0	0.278987	0	0.220014	0	0	0	0	0.218502	-0.23816	0.217779	0.207917	0	0	0.331155	0	0.244964	0.202625	0	0.322082	0.339472	0	0	0.540584	0.41659	0.227575	0.350057	0.282767	0	0	0	0.532268	0.363666	0.539072	0.588972
K05915	0	0	0	0	0	0	0	0	0	0	0	0	0	0	0	0	0	0	0	0	0	0	0	0	0	0	0	0	0	0	0	0	0	0	0	0	0	0	0	0	0	0	0	0	0	0	0	0	0
K09146	0	0	0	0	0	0	0	0	0	0	0	0	0	0	0	0	0	0	0	0	0	0	0	0	0	0	0	0	0	0	0	0	0	0	0	0	0	0	0	0	0	0	0	0	0	0	0	0	0
K05709	0	0	0	0	0	0	0	0	0	0	0	0	0	0	0	0	0	0	0	0	0	0	0	0	0	0	0	0	0	0	0	0	0	0	0	0	0	0	0	0	0	0	0	0	0	0	0	0	0
K05708	0	0	0	0	0	0	0	0	0	0	0	0	0	0	0	0	0	0	0	0	0	0	0	0	0	0	0	0	0	0	0	0	0	0	0	0	0	0	0	0	0	0	0	0	0	0	0	0	0
K05877	0.075537	-0.025179	-0.0755831	0.226611	0.176253	0.176253	0.276969	-0.201432	0.075537	0.201432	0.050358	-0.201432	0.276969	0.176253	0.025179	0.176253	-0.176253	0.226611	-0.276969	-0.125895	-0.151074	0.125895	0.226611	-0.25179	0.125914	0.226611	0.327327	0.327327	0.302148	0.025179	0.050358	0.302148	0.25179	0.276969	0.276969	-0.151074	-0.125895	0.302148	0.25179	0.151074	0.25179	0.276969	0.125972	0.327327	0.226611	0.327327	0.302148	0.327327	0.302148
K08085	0	0	0	0	0	0	0	0	0	0	0	0	0	0	0	0	0	0	0	0	0	0	0	0	0	0	0	0	0	0	0	0	0	0	0	0	0	0	0	0	0	0	0	0	0	0	0	0	0
K10211	0	0	0	0	0	0	0	0	0	0	0	0	0	0	0	0	0	0	0	0	0	0	0	0	0	0	0	0	0	0	0	0	0	0	0	0	0	0	0	0	0	0	0	0	0	0	0	0	0
K00186	0	0	0	0	0	0	0	0	0	0	0	0	0	0	0	0	0	0	0	0	0	0	0	0	0	0	0	0	0	0	0	0	0	0	0	0	0	0	0	0	0	0	0	0	0	0	0	0	0
K00187	0	0	0	0	0	0	0	0	0	0	0	0	0	0	0	0	0	0	0	0	0	0	0	0	0	0	0	0	0	0	0	0	0	0	0	0	0	0	0	0	0	0	0	0	0	0	0	0	0
K00188	0	0	0	0	0	0	0	0	0	0	0	0	0	0	0	0	0	0	0	0	0	0	0	0	0	0	0	0	0	0	0	0	0	0	0	0	0	0	0	0	0	0	0	0	0	0	0	0	0
K14949	0	0	0	0	0	0	0	0	0	0	0	0	0	0	0	0	0	0	0	0	0	0	0	0	0	0	0	0	0	0	0	0	0	0	0	0	0	0	0	0	0	0	0	0	0	0	0	0	0
K08985	0	0	0	0	0	0	0	0	0	0	0	0	0	0	0	0	0	0	0	0	0	0	0	0	0	0	0	0	0	0	0	0	0	0	0	0	0	0	0	0	0	0	0	0	0	0	0	0	0
K08989	0	0	0	0	0	0	0	0	0	0	0	0	0	0	0	0	0	0	0	0	0	0	0	0	0	0	0	0	0	0	0	0	0	0	0	0	0	0	0	0	0	0	0	0	0	0	0	0	0
K00510	0	0	0	0	0	0	0	0	0	0	0	0	0	0	0	0	0	0	0	0	0	0	0	0	0	0	0	0	0	0	0	0	0	0	0	0	0	0	0	0	0	0	0	0	0	0	0	0	0
K05971	0	0	0	0	0	0	0	0	0	0	0	0	0	0	0	0	0	0	0	0	0	0	0	0	0	0	0	0	0	0	0	0	0	0	0	0	0	0	0	0	0	0	0	0	0	0	0	0	0
K02448	0	0	0	0	0	0	0	0	0	0	0	0	0	0	0	0	0	0	0	0	0	0	0	0	0	0	0	0	0	0	0	0	0	0	0	0	0	0	0	0	0	0	0	0	0	0	0	0	0
K13007	0	0	0	0	0	0	0	0	0	0	0	0	0	0	0	0	0	0	0	0	0	0	0	0	0	0	0	0	0	0	0	0	0	0	0	0	0	0	0	0	0	0	0	0	0	0	0	0	0
K10814	0	0	0	0	0	0	0	0	0	0	0	0	0	0	0	0	0	0	0	0	0	0	0	0	0	0	0	0	0	0	0	0	0	0	0	0	0	0	0	0	0	0	0	0	0	0	0	0	0
K10816	0	0	0	0	0	0	0	0	0	0	0	0	0	0	0	0	0	0	0	0	0	0	0	0	0	0	0	0	0	0	0	0	0	0	0	0	0	0	0	0	0	0	0	0	0	0	0	0	0
K06214	0	0	0	0	0	0	0	0	0	0	0	0	0	0	0	0	0	0	0	0	0	0	0	0	0	0	0	0	0	0	0	0	0	0	0	0	0	0	0	0	0	0	0	0	0	0	0	0	0
K02305	0	0	0	0	0	0	0	0	0	0	0	0	0	0	0	0	0	0	0	0	0	0	0	0	0	0	0	0	0	0	0	0	0	0	0	0	0	0	0	0	0	0	0	0	0	0	0	0	0
K12437	-0.302148	-0.276969	-0.226749	-0.327327	-0.302148	-0.327327	-0.327327	-0.327327	-0.302148	-0.327327	-0.327327	-0.327327	-0.327327	-0.327327	-0.327327	-0.201432	-0.226611	-0.327327	-0.25179	-0.226611	-0.25179	-0.25179	-0.327327	-0.276969	-0.314785	-0.302148	-0.201432	-0.276969	-0.276969	0.075537	-0.302148	-0.100716	0.025179	-0.327327	-0.327327	-0.125895	-0.327327	-0.327327	-0.327327	-0.327327	-0.327327	-0.327327	-0.302332	-0.327327	-0.176253	-0.327327	-0.276969	-0.327327	-0.302148
K00539	0	0	0	0	0	0	0	0	0	0	0	0	0	0	0	0	0	0	0	0	0	0	0	0	0	0	0	0	0	0	0	0	0	0	0	0	0	0	0	0	0	0	0	0	0	0	0	0	0
K14268	0	0	0	0	0	0	0	0	0	0	0	0	0	0	0	0	0	0	0	0	0	0	0	0	0	0	0	0	0	0	0	0	0	0	0	0	0	0	0	0	0	0	0	0	0	0	0	0	0
K14269	0	0	0	0	0	0	0	0	0	0	0	0	0	0	0	0	0	0	0	0	0	0	0	0	0	0	0	0	0	0	0	0	0	0	0	0	0	0	0	0	0	0	0	0	0	0	0	0	0
K01483	0.420132	0	0	0	0.543444	0	0	0	0	0.236074	0	0	0.354294	0.256081	0	0.257536	0	0	0	0	0	0	0	-0.280452	0.28668	0.29282	0	0	0.391396	0	0.280816	0.244077	0	0.36848	0.256808	0	0	0.457599	0.32774	0	0.244077	0.264083	0	0.253534	0	0.531077	0.40922	0.574727	0.58091
K08685	0	0	0	0	0	0	0	0	0	0	0	0	0	0	0	0	0	0	0	0	0	0	0	0	0	0	0	0	0	0	0	0	0	0	0	0	0	0	0	0	0	0	0	0	0	0	0	0	0
K08687	0	0	0	0	0	0	0	0	0	0	0	0	0	0	0	0	0	0	0	0	0	0	0	0	0	0	0	0	0	0	0	0	0	0	0	0	0	0	0	0	0	0	0	0	0	0	0	0	0
K08686	0.075537	-0.025179	-0.0755831	0.226611	0.176253	0.176253	0.276969	-0.201432	0.075537	0.201432	0.050358	-0.201432	0.276969	0.176253	0.025179	0.176253	-0.176253	0.226611	-0.276969	-0.125895	-0.151074	0.125895	0.226611	-0.25179	0.125914	0.226611	0.327327	0.327327	0.302148	0.025179	0.050358	0.302148	0.25179	0.276969	0.276969	-0.151074	-0.125895	0.302148	0.25179	0.151074	0.25179	0.276969	0.125972	0.327327	0.226611	0.327327	0.302148	0.327327	0.302148
K04940	0	0	0	0	0	0	0	0	0	0	0	0	0	0	0	0	0	0	0	0	0	0	0	0	0	0	0	0	0	0	0	0	0	0	0	0	0	0	0	0	0	0	0	0	0	0	0	0	0
K03418	0	0	0	0	0	0	0	0	0	0	0	0	0	0	0	0	0	0	0	0	0	0	0	0	0	0	0	0	0	0	0	0	0	0	0	0	0	0	0	0	0	0	0	0	0	0	0	0	0
K13540	0	0	0	0	0	0	0	0	0	0	0	0	0	0	0	0	0	0	0	0	0	0	0	0	0	0	0	0	0	0	0	0	0	0	0	0	0	0	0	0	0	0	0	0	0	0	0	0	0
K12145	0.201432	0.327327	0.327527	0.327327	0.276969	0.327327	0.327327	0.327327	0.327327	0.327327	0.327327	0.327327	0.327327	0.302148	0.327327	0.327327	0.327327	0.327327	0.327327	0.25179	0.25179	0.327327	0.327327	0.327327	0	0.327327	-0.25179	0.176253	0.327327	0	0.276969	0.276969	0.151074	0.176253	0.327327	0	0.327327	0.327327	0.302148	0.327327	0.327327	0.327327	0	0	0	0.151074	-0.25179	0	0
K12144	0.201432	0.327327	0.327527	0.327327	0.276969	0.327327	0.327327	0.327327	0.327327	0.327327	0.327327	0.327327	0.327327	0.302148	0.327327	0.327327	0.327327	0.327327	0.327327	0.25179	0.25179	0.327327	0.327327	0.327327	0	0.327327	-0.25179	0.176253	0.327327	0	0.276969	0.276969	0.151074	0.176253	0.327327	0	0.327327	0.327327	0.302148	0.327327	0.327327	0.327327	0	0	0	0.151074	-0.25179	0	0
K12142	0.201432	0.327327	0.327527	0.327327	0.276969	0.327327	0.327327	0.327327	0.327327	0.327327	0.327327	0.327327	0.327327	0.302148	0.327327	0.327327	0.327327	0.327327	0.327327	0.25179	0.25179	0.327327	0.327327	0.327327	0	0.327327	-0.25179	0.176253	0.327327	0	0.276969	0.276969	0.151074	0.176253	0.327327	0	0.327327	0.327327	0.302148	0.327327	0.327327	0.327327	0	0	0	0.151074	-0.25179	0	0
K10815	0	0	0	0	0	0	0	0	0	0	0	0	0	0	0	0	0	0	0	0	0	0	0	0	0	0	0	0	0	0	0	0	0	0	0	0	0	0	0	0	0	0	0	0	0	0	0	0	0
K01415	0	0	0	0	0	0	0	0	0	0	0	0	0	0	0	0	0	0	0	0	0	0	0	0	0	0	0	0	0	0	0	0	0	0	0	0	0	0	0	0	0	0	0	0	0	0	0	0	0
K10210	0	0	0	0	0	0	0	0	0	0	0	0	0	0	0	0	0	0	0	0	0	0	0	0	0	0	0	0	0	0	0	0	0	0	0	0	0	0	0	0	0	0	0	0	0	0	0	0	0
K03202	0	0	0	0	0	0	0	0	0	0	0	0	0	0	0	0	0	0	0	0	0	0	0	0	0	0	0	0	0	0	0	0	0	0	0	0	0	0	0	0	0	0	0	0	0	0	0	0	0
K03208	0	0	0	0	0	0	0	0	0	0	0	0	0	0	0	0	0	0	0	0	0	0	0	0	0	0	0	0	0	0	0	0	0	0	0	0	0	0	0	0	0	0	0	0	0	0	0	0	0
K09461	0.396177	-0.108873	-0.0446349	0.132311	0.488416	0.0211697	0.166334	0.120214	0.0355349	0.260841	0.177675	0.0544365	0.409786	0.274451	0.127774	0.278231	0.0740941	0.215478	-0.0945078	-0.0756062	0.168602	-0.0559486	0.215478	-0.237403	0.217023	0.210185	-0.0506562	0.085435	0.322082	-0.142896	0.238916	0.191284	0.138359	0.314522	0.328887	-0.060485	0.168602	0.534536	0.410542	0.219258	0.333423	0.278231	0.0325305	0.171626	0.0309985	0.525463	0.355349	0.536048	0.58746
K00477	0	0	0	0	0	0	0	0	0	0	0	0	0	0	0	0	0	0	0	0	0	0	0	0	0	0	0	0	0	0	0	0	0	0	0	0	0	0	0	0	0	0	0	0	0	0	0	0	0
K00470	0	0	0	0	0	0	0	0	0	0	0	0	0	0	0	0	0	0	0	0	0	0	0	0	0	0	0	0	0	0	0	0	0	0	0	0	0	0	0	0	0	0	0	0	0	0	0	0	0
K00471	0	0	0	0	0	0	0	0	0	0	0	0	0	0	0	0	0	0	0	0	0	0	0	0	0	0	0	0	0	0	0	0	0	0	0	0	0	0	0	0	0	0	0	0	0	0	0	0	0
K00479	0	0	0	0	0	0	0	0	0	0	0	0	0	0	0	0	0	0	0	0	0	0	0	0	0	0	0	0	0	0	0	0	0	0	0	0	0	0	0	0	0	0	0	0	0	0	0	0	0
K09926	0.419405	-0.192788	-0.14013	0.0883915	0.539807	-0.0567452	0.0974853	0.0647477	0.01455	0.228799	0.100395	-0.0298276	0.347746	0.227708	0.115673	0.244441	-0.0298276	0.158959	-0.133497	-0.0345563	0.156413	-0.106215	0.158959	-0.28991	0.288862	0.259354	0.0331013	0.0501976	0.394306	-0.108398	0.288091	0.243349	0.182967	0.37139	0.238621	-0.161142	0.0909378	0.460509	0.313917	0.155322	0.254262	0.269903	0.141222	0.264447	0.0454689	0.537624	0.430317	0.584184	0.576545
K03692	0	0	0	0	0	0	0	0	0	0	0	0	0	0	0	0	0	0	0	0	0	0	0	0	0	0	0	0	0	0	0	0	0	0	0	0	0	0	0	0	0	0	0	0	0	0	0	0	0
K07338	0.386348	-0.108117	-0.0453914	0.1497	0.482368	0.0234379	0.182967	0.0967759	0.0317546	0.272182	0.168602	0.0309985	0.418858	0.279743	0.122482	0.286548	0.0551925	0.221526	-0.113409	-0.0839229	0.185991	-0.0468758	0.21699	-0.247232	0.23139	0.239672	-0.0665335	0.0718259	0.317546	-0.163309	0.225306	0.190528	0.118702	0.314522	0.327375	-0.0899714	0.141384	0.536048	0.406005	0.207917	0.313766	0.281255	0.0514436	0.172382	0.0211697	0.526219	0.348545	0.536048	0.590484
K05991	0	0	0	0	0	0	0	0	0	0	0	0	0	0	0	0	0	0	0	0	0	0	0	0	0	0	0	0	0	0	0	0	0	0	0	0	0	0	0	0	0	0	0	0	0	0	0	0	0
K00317	0	0	0	0	0	0	0	0	0	0	0	0	0	0	0	0	0	0	0	0	0	0	0	0	0	0	0	0	0	0	0	0	0	0	0	0	0	0	0	0	0	0	0	0	0	0	0	0	0
K00316	0	0	0	0	0	0	0	0	0	0	0	0	0	0	0	0	0	0	0	0	0	0	0	0	0	0	0	0	0	0	0	0	0	0	0	0	0	0	0	0	0	0	0	0	0	0	0	0	0
K00314	0	0	0	0	0	0	0	0	0	0	0	0	0	0	0	0	0	0	0	0	0	0	0	0	0	0	0	0	0	0	0	0	0	0	0	0	0	0	0	0	0	0	0	0	0	0	0	0	0
K00300	0	0	0	0	0	0	0	0	0	0	0	0	0	0	0	0	0	0	0	0	0	0	0	0	0	0	0	0	0	0	0	0	0	0	0	0	0	0	0	0	0	0	0	0	0	0	0	0	0
K02641	0	0	0	0	0	0	0	0	0	0	0	0	0	0	0	0	0	0	0	0	0	0	0	0	0	0	0	0	0	0	0	0	0	0	0	0	0	0	0	0	0	0	0	0	0	0	0	0	0
K09990	0.414312	-0.196426	0	0	0.534714	0	0	0	0	0.233164	0	0	0.351384	0.231346	0	0.248078	0	0.159687	0	0	0.170963	0	0.158232	-0.294275	0.295411	0.274632	0	0	0.387759	0	0.278633	0.237529	0.166234	0.367752	0.232801	-0.177874	0	0.458326	0.308825	0	0.236802	0.269176	0.152141	0.260082	0	0.534714	0.423042	0.582729	0.577273
K09994	0	0	0	0	0	0	0	0	0	0	0	0	0	0	0	0	0	0	0	0	0	0	0	-0.638046	0	0	0	0	0	0	0	0	0	0	0	0	0	0	0	0	0	0	0	0	0	0	0	0	0
K01504	0.210277	-0.314296	-0.342468	-0.074939	0.234883	-0.0620763	0.23712	-0.152115	-0.0878017	0.17784	-0.151556	-0.152115	0.360155	0.335548	-0.0206921	0.210277	-0.247187	0.204684	-0.333311	-0.167215	-0.0413842	-0.244391	0.297519	-0.331074	0.0592892	0.184551	0.153233	0.106816	0.303671	-0.0598394	0.036351	0.194618	0.173926	0.260609	0.180637	-0.143726	-0.0973089	0.338344	0.308145	0.123593	0.12639	0.325481	0.156685	0.272353	0.101783	0.367425	0.350088	0.493815	0.465852
K12107	0.201432	0.327327	0.327527	0.327327	0.276969	0.327327	0.327327	0.327327	0.327327	0.327327	0.327327	0.327327	0.327327	0.302148	0.327327	0.327327	0.327327	0.327327	0.327327	0.25179	0.25179	0.327327	0.327327	0.327327	0	0.327327	-0.25179	0.176253	0.327327	0	0.276969	0.276969	0.151074	0.176253	0.327327	0	0.327327	0.327327	0.302148	0.327327	0.327327	0.327327	0	0	0	0.151074	-0.25179	0	0
K00663	0	0	0	0	0	0	0	0	0	0	0	0	0	0	0	0	0	0	0	0	0	0	0	0	0	0	0	0	0	0	0	0	0	0	0	0	0	0	0	0	0	0	0	0	0	0	0	0	0
K06992	0	0	0	0	0	0	0	-0.404493	0	0	0	-0.448345	0	0	0	0	0	0	0	0	0	0	0	0	0	0.374251	0	-0.418858	-0.444564	-0.310741	0	-0.353081	0	-0.332667	0	0	-0.361398	0	0	0	-0.440784	0	0	0	-0.335692	0	0	0	0
K00594	0	0	0	0	0	0	0	0	0	0	0	0	0	0	0	0	0	0	0	0	0	0	0	0	0	0	0	0	0	0	0	0	0	0	0	0	0	0	0	0	0	0	0	0	0	0	0	0	0
K04102	0.396933	-0.100556	-0.0378262	0.14214	0.492952	0.0325107	0.169358	0.12097	0.0438516	0.26311	0.188259	0.0551925	0.411298	0.272182	0.131555	0.278987	0.0778744	0.220014	-0.0937517	-0.0748501	0.155749	-0.0438516	0.218502	-0.23816	0.217779	0.207917	-0.0317546	0.105093	0.331155	-0.133067	0.244964	0.202625	0.153481	0.322082	0.339472	-0.0551925	0.173138	0.540584	0.41659	0.227575	0.350057	0.282767	0.0287479	0.181455	0.0438516	0.532268	0.363666	0.539072	0.588972
K13772	0	0	0	0	0	0	0	0	0	0	0	0	0	0	0	0	0	0	0	0	0	0	0	0	0	0	0	0	0	0	0	0	0	0	0	0	0	0	0	0	0	0	0	0	0	0	0	0	0
K13774	0	0	0	0	0	0	0	0	0	0	0	0	0	0	0	0	0	0	0	0	0	0	0	0	0	0	0	0	0	0	0	0	0	0	0	0	0	0	0	0	0	0	0	0	0	0	0	0	0
K13777	0	0	0	0	0	0	0	0	0	0	0	0	0	0	0	0	0	0	0	0	0	0	0	0	0	0	0	0	0	0	0	0	0	0	0	0	0	0	0	0	0	0	0	0	0	0	0	0	0
K13776	0	0	0	0	0	0	0	0	0	0	0	0	0	0	0	0	0	0	0	0	0	0	0	0	0	0	0	0	0	0	0	0	0	0	0	0	0	0	0	0	0	0	0	0	0	0	0	0	0
K13779	0	0	0	0	0	0	0	0	0	0	0	0	0	0	0	0	0	0	0	0	0	0	0	0	0	0	0	0	0	0	0	0	0	0	0	0	0	0	0	0	0	0	0	0	0	0	0	0	0
K13778	0	0	0	0	0	0	0	0	0	0	0	0	0	0	0	0	0	0	0	0	0	0	0	0	0	0	0	0	0	0	0	0	0	0	0	0	0	0	0	0	0	0	0	0	0	0	0	0	0
K02623	0	0	0	0	0	0	0	0	0	0	0	0	0	0	0	0	0	0	0	0	0	0	0	0	0	0	0	0	0	0	0	0	0	0	0	0	0	0	0	0	0	0	0	0	0	0	0	0	0
K08286	0	0	0	0	0	0	0	0	0	0	0	0	0	0	0	0	0	0	0	0	0	0	0	0	0	0	0	0	0	0	0	0	0	0	0	0	0	0	0	0	0	0	0	0	0	0	0	0	0
K11731	0	0	0	0	0	0	0	0	0	0	0	0	0	0	0	0	0	0	0	0	0	0	0	0	0	0	0	0	0	0	0	0	0	0	0	0	0	0	0	0	0	0	0	0	0	0	0	0	0
K07476	0	0	0	0	0	0	0	0	0	0	0	0	0	0	0	0	0	0	0	0	0	0	0	0	0	0	0	0	0	0	0	0	0	0	0	0	0	0	0	0	0	0	0	0	0	0	0	0	0
K00122	0	0	0	0	0	0	0	0	0	0	0	0	0	0	0	0	0	0	0	0	0	0	0	0	0	0	0	0	0	0	0	0	0	0	0	0	0	0	0	0	0	0	0	0	0	0	0	0	0
K00126	0.390884	-0.112653	-0.0484175	0.136091	0.483124	0.0166334	0.173138	0.108117	0.0294864	0.265378	0.167846	0.0423395	0.413566	0.278231	0.123238	0.282011	0.0627531	0.216234	-0.104337	-0.0801426	0.183723	-0.0574607	0.214722	-0.24194	0.223829	0.226063	-0.0680456	0.0688016	0.315278	-0.158017	0.229087	0.185235	0.12097	0.310741	0.322838	-0.0778744	0.152725	0.532268	0.405249	0.209429	0.315278	0.277475	0.0438784	0.16709	0.0196576	0.522439	0.347789	0.534536	0.588216
K14347	0.075537	-0.025179	-0.0755831	0.226611	0.176253	0.176253	0.276969	-0.201432	0.075537	0.201432	0.050358	-0.201432	0.276969	0.176253	0.025179	0.176253	-0.176253	0.226611	-0.276969	-0.125895	-0.151074	0.125895	0.226611	-0.25179	0.125914	0.226611	0.327327	0.327327	0.302148	0.025179	0.050358	0.302148	0.25179	0.276969	0.276969	-0.151074	-0.125895	0.302148	0.25179	0.151074	0.25179	0.276969	0.125972	0.327327	0.226611	0.327327	0.302148	0.327327	0.302148
K08977	0	0	0	0	0	0	0	0	0	0	0	0	0	0	0	0	0	0	0	0	0	0	0	0	0	0	0	0	0	0	0	0	0	0	0	0	0	0	0	0	0	0	0	0	0	0	0	0	0
K13525	0	0	0	0	0	0	0	0	0	0	0	0	0	0	0	0	0	0	0	0	0	0	0	0	0	0	0	0	0	0	0	0	0	0	0	0	0	0	0	0	0	0	0	0	0	0	0	0	0
K03384	0	0	0	0	0	0	0	0	0	0	0	0	0	0	0	0	0	0	0	0	0	0	0	0	0	0	0	0	0	0	0	0	0	0	0	0	0	0	0	0	0	0	0	0	0	0	0	0	0
K03381	0	0	0	0	0	0	0	0	0	0	0	0	0	0	0	0	0	0	0	0	0	0	0	0	0	0	0	0	0	0	0	0	0	0	0	0	0	0	0	0	0	0	0	0	0	0	0	0	0
K11695	0	0	0	0	0	0	0	0	0	0	0	0	0	0	0	0	0	0	0	0	0	0	0	0	0	0	0	0	0	0	0	0	0	0	0	0	0	0	0	0	0	0	0	0	0	0	0	0	0
K11693	0	0	0	0	0	0	0	0	0	0	0	0	0	0	0	0	0	0	0	0	0	0	0	0	0	0	0	0	0	0	0	0	0	0	0	0	0	0	0	0	0	0	0	0	0	0	0	0	0
K03433	0.0544365	-0.210185	-0.124826	-0.0960199	0.0423395	0.0536804	0.170114	-0.0559486	-0.225306	0.0347789	0.121726	-0.0665335	0.210941	0.0839229	-0.29562	-0.0499001	-0.257817	0.120214	-0.314522	-0.539072	-0.0703138	-0.287304	0.158017	-0.233623	0.122501	0.0952638	-0.024194	0.268402	0.265378	-0.130799	-0.0914835	0.257817	0.155749	0.0801426	0.302425	-0.421883	-0.0211697	0.39164	0.273694	0.227575	0.012097	0.331911	0.28521	0.381055	-0.0929956	0.198088	0.0892153	0.29562	0.272182
K13832	0	0	0	0	0	0	0	0	0	0	0	0	0	0	0	0	0	0	0	0	0	0	0	0	0	0	0	0	0	0	0	0	0	0	0	0	0	0	0	0	0	0	0	0	0	0	0	0	0
K03432	0	0	0	0	0	0	0	0	0	0	0	0	0	0	0	0	0	0	0	0	0	0	0	0	0	0	0	0	0	0	0	0	0	0	0	0	0	0	0	0	0	0	0	0	0	0	0	0	0
K11474	0	0	0	0	0	0	0	0	0	0	0	0	0	0	0	0	0	0	0	0	0	0	0	0	0	0	0	0	0	0	0	0	0	0	0	0	0	0	0	0	0	0	0	0	0	0	0	0	0
K11476	0	0	0	0	0	0	0	0	0	0	0	0	0	0	0	0	0	0	0	0	0	0	0	0	0	0	0	0	0	0	0	0	0	0	0	0	0	0	0	0	0	0	0	0	0	0	0	0	0
K00607	0	0	0	0	0	0	0	0	0	0	0	0	0	0	0	0	0	0	0	0	0	0	0	0	0	0	0	0	0	0	0	0	0	0	0	0	0	0	0	0	0	0	0	0	0	0	0	0	0
K09650	0	0	0	0	0	0	0	0	0	0	0	0	0	0	0	0	0	0	0	0	0	0	0	0	0	0	0	0	0	0	0	0	0	0	0	0	0	0	0	0	0	0	0	0	0	0	0	0	0
K07807	0	0	0	0	0	0	0	0	0	0	0	0	0	0	0	0	0	0	0	0	0	0	0	0	0	0	0	0	0	0	0	0	0	0	0	0	0	0	0	0	0	0	0	0	0	0	0	0	0
K10253	0	0	0	0	0	0	0	0	0	0	0	0	0	0	0	0	0	0	0	0	0	0	0	0	0	0	0	0	0	0	0	0	0	0	0	0	0	0	0	0	0	0	0	0	0	0	0	0	0
K01959	0	0	0	0	0	0	0	-0.404493	0	0	0	-0.448345	0	0	0	0	0	0	0	0	0	0	0	0	0	0.374251	0	-0.418858	-0.444564	-0.310741	0	-0.353081	0	-0.332667	0	0	-0.361398	0	0	0	-0.440784	0	0	0	-0.335692	0	0	0	0
K00141	0	0	0	0	0.236536	0	0	-0.272823	0	0	0	0	0	0	0	0	0	0	-0.22444	-0.303734	-0.305078	0	0	0	0	0	0	0.227128	0	0	0	0	0.275511	0	0.276855	0	0	0.278199	0.240568	0	0.240568	0	0	0	0	0.279543	0.330613	0.3669	0.348084
K04712	0	0	0	0	0	0	0	0	0	0	0	0	0	0	0	0	0	0	0	0	0	0	0	0	0	0	0	0	0	0	0	0	0	0	0	0	0	0	0	0	0	0	0	0	0	0	0	0	0
K13815	0	0	0	0	0	0	0	0	0	0	0	0	0	0	0	0	0	0	0	0	0	0	0	0	0	0	0	0	0	0	0	0	0	0	0	0	0	0	0	0	0	0	0	0	0	0	0	0	0
K02803	0	0	0	0	0	0	0	0	0	0	0	0	0	0	0	0	0	0	0	0	0	0	0	0	0	0	0	0	0	0	0	0	0	0	0	0	0	0	0	0	0	0	0	0	0	0	0	0	0
K10233	0	0	0	0	0	0	0	0	0	0	0	0	0	0	0	0	0	0	0	0	0	0	0	0	0	0	0	0	0	0	0	0	0	0	0	0	0	0	0	0	0	0	0	0	0	0	0	0	0
K10232	0	0	0	0	0	0	0	0	0	0	0	0	0	0	0	0	0	0	0	0	0	0	0	0	0	0	0	0	0	0	0	0	0	0	0	0	0	0	0	0	0	0	0	0	0	0	0	0	0
K10235	0	0	0	0	0	0	0	0	0	0	0	0	0	0	0	0	0	0	0	0	0	0	0	0	0	0	0	0	0	0	0	0	0	0	0	0	0	0	0	0	0	0	0	0	0	0	0	0	0
K10234	0	0	0	0	0	0	0	0	0	0	0	0	0	0	0	0	0	0	0	0	0	0	0	0	0	0	0	0	0	0	0	0	0	0	0	0	0	0	0	0	0	0	0	0	0	0	0	0	0
K01970	0	0	0	0	0	0	0	0	0	0	0	0	0	0	0	0	0	0	0	0	0	0	0	0	0	0	0	0	0	0	0	0	0	0	0	0	0	0	0	0	0	0	0	0	0	0	0	0	0
K13786	0	0	0	0	0	0	0	0	0	0	0	0	0	0	0	0	0	0	0	0	0	0	0	0	0	0	0	0	0	0	0	0	0	0	0	0	0	0	0	0	0	0	0	0	0	0	0	0	0
K01283	0	0	0	0	0	0	0	0	0	0	0	0	0	0	0	0	0	0	0	0	0	0	0	0	0	0	0	0	0	0	0	0	0	0	0	0	0	0	0	0	0	0	0	0	0	0	0	0	0
K14048	0	0	0	0	0	0	0	-0.371997	0	0	0	-0.416583	0	0	0	0	0	0	0	0	0	0	0	0	0	0	0	-0.402622	-0.522418	0	0	-0.386409	0	-0.416583	0	0	0	0	0	0	-0.435948	0	0	0	0	0	0	0	0
K14136	0	0	0	0	0	0	0	0	0	0	0	0	0	0	0	0	0	0	0	0	0	0	0	0	0	0	0	0	0	0	0	0	0	0	0	0	0	0	0	0	0	0	0	0	0	0	0	0	0
K03532	0	0	0	0	0	0	0	-0.371997	0	0	0	-0.416583	0	0	0	0	0	0	0	0	0	0	0	0	0	0	0	-0.402622	-0.522418	0	0	-0.386409	0	-0.416583	0	0	0	-0.360738	0	0	-0.435948	0	0	0	0	0	0	0	0
K02225	0	0	0	0	0	0	0	0	0	0	0	0	0	0	0	0	0	0	0	0	0	0	0	0	0	0	0	0	0	0	0	0	0	0	0	0	0	0	0	0	0	0	0	0	0	0	0	0	0
K03285	0	-0.179733	-0.129447	-0.0780159	0.069128	-0.192571	0.145169	-0.170845	-0.222197	0.316014	-0.209359	-0.111592	0.128381	0.390079	-0.0780159	0.400942	-0.12048	0.092829	-0.12048	-0.230097	0.390079	-0.210347	0.363416	-0.102704	-0.0622247	0.451307	-0.315026	-0.0632027	0.226147	-0.303176	-0.134306	-0.0780159	-0.197509	-0.109617	0.255774	-0.232073	-0.207384	0.198496	0.303176	0.11258	-0.0997418	0.307126	0.181819	0	-0.192571	0.236023	-0.265649	0	0.247873
K12683	0	0	0	0	0	0	0	0	0	0	0	0	0	0	0	0	0	0	0	0	0	0	0	0	0	0	0	0	0	0	0	0	0	0	0	0	0	0	0	0	0	0	0	0	0	0	0	0	0
K06347	0	0	0	0	0	0	0	0	0	0	0	0	0	0	0	0	0	0	0	0	0	0	0	0	0	0	0	0	0	0	0	0	0	0	0	0	0	0	0	0	0	0	0	0	0	0	0	0	0
K11337	0	0	0	0	0	0	0	0	0	0	0	0	0	0	0	0	0	0	0	0	0	0	0	0	0	0	0	0	0	0	0	0	0	0	0	0	0	0	0	0	0	0	0	0	0	0	0	0	0
K01564	0	0	0	0	0	0	0	-0.404493	0	0	0	-0.448345	0	0	0	0	0	0	0	0	0	0	0	0	0	0.374251	0	-0.418858	-0.444564	-0.310741	0	-0.353081	0	-0.332667	0	0	-0.361398	0	0	0	-0.440784	0	0	0	-0.335692	0	0	0	0
K05556	-0.302148	-0.276969	-0.226749	-0.327327	-0.302148	-0.327327	-0.327327	-0.327327	-0.302148	-0.327327	-0.327327	-0.327327	-0.327327	-0.327327	-0.327327	-0.201432	-0.226611	-0.327327	-0.25179	-0.226611	-0.25179	-0.25179	-0.327327	-0.276969	-0.314785	-0.302148	-0.201432	-0.276969	-0.276969	0.075537	-0.302148	-0.100716	0.025179	-0.327327	-0.327327	-0.125895	-0.327327	-0.327327	-0.327327	-0.327327	-0.327327	-0.327327	-0.302332	-0.327327	-0.176253	-0.327327	-0.276969	-0.327327	-0.302148
K05550	0	0	0	0	0.236536	0	0	-0.272823	0	0	0	0	0	0	0	0	0	0	-0.22444	-0.303734	-0.305078	0	0	0	0	0	0	0.227128	0	0	0	0	0.275511	0	0.276855	0	0	0.278199	0.240568	0	0.240568	0	0	0	0	0.279543	0.330613	0.3669	0.348084
K12306	0	0	0	0	0	0	0	0	0	0	0	0	0	0	0	0	0	0	0	0	0	0	0	0	0	0	0	0	0	0	0	0	0	0	0	0	0	0	0	0	0	0	0	0	0	0	0	0	0
K06139	0	0	0	0	0	0	0	0	0	0	0	0	0	0	0	0	0	0	0	0	0	0	0	0	0	0	0	0	0	0	0	0	0	0	0	0	0	0	0	0	0	0	0	0	0	0	0	0	0
K06135	0.075537	-0.025179	-0.0755831	0.226611	0.176253	0.176253	0.276969	-0.201432	0.075537	0.201432	0.050358	-0.201432	0.276969	0.176253	0.025179	0.176253	-0.176253	0.226611	-0.276969	-0.125895	-0.151074	0.125895	0.226611	-0.25179	0.125914	0.226611	0.327327	0.327327	0.302148	0.025179	0.050358	0.302148	0.25179	0.276969	0.276969	-0.151074	-0.125895	0.302148	0.25179	0.151074	0.25179	0.276969	0.125972	0.327327	0.226611	0.327327	0.302148	0.327327	0.302148
K06136	0	0	0	0	0	0	0	0	0	0	0	0	0	0	0	0	0	0	0	0	0	0	0	0	0	0	0	0	0	0	0	0	0	0	0	0	0	0	0	0	0	0	0	0	0	0	0	0	0
K09977	0	0	0	0	0	0	0	0	0	0	0	0	0	0	0	0	0	0	0	0	0	0	0	0	0	0	0	0	0	0	0	0	0	0	0	0	0	0	0	0	0	0	0	0	0	0	0	0	0
K11437	0	0	0	0	0	0	0	0	0	0	0	0	0	0	0	0	0	0	0	0	0	0	0	0	0	0	0	0	0	0	0	0	0	0	0	0	0	0	0	0	0	0	0	0	0	0	0	0	0
K01917	0	0	0	0	0	0	0	-0.371997	0	0	0	-0.416583	0	0	0	0	0	0	0	0	0	0	0	0	0	0	0	-0.402622	-0.522418	0	0	-0.386409	0	-0.416583	0	0	0	0	0	0	-0.435948	0	0	0	0	0	0	0	0
K07772	0	0	0	0	0	0	0	0	0	0	0	0	0	0	0	0	0	0	0	0	0	0	0	0	0	0	0	0	0	0	0	0	0	0	0	0	0	0	0	0	0	0	0	0	0	0	0	0	0
K00207	0.386348	0	0	0	0.479343	0	0	0	0	0.301669	0	0	0.449101	0.282011	0	0.316034	0	0.247988	0	0	0	0	0	-0.260085	0	0.247232	0	0	0.339472	0	0	0	0	0.338716	0.318302	0	0	0.536804	0.399201	0	0.310741	0.291084	0	0	0	0.53378	0.344008	0.529243	0.584436
K13714	0	0	0	0	0	0	0	0	0	0	0	0	0	0	0	0	0	0	0	0	0	0	0	0	0	0	0	0	0	0	0	0	0	0	0	0	0	0	0	0	0	0	0	0	0	0	0	0	0
K12518	0.075537	-0.025179	-0.0755831	0.226611	0.176253	0.176253	0.276969	-0.201432	0.075537	0.201432	0.050358	-0.201432	0.276969	0.176253	0.025179	0.176253	-0.176253	0.226611	-0.276969	-0.125895	-0.151074	0.125895	0.226611	-0.25179	0.125914	0.226611	0.327327	0.327327	0.302148	0.025179	0.050358	0.302148	0.25179	0.276969	0.276969	-0.151074	-0.125895	0.302148	0.25179	0.151074	0.25179	0.276969	0.125972	0.327327	0.226611	0.327327	0.302148	0.327327	0.302148
K12519	0.075537	-0.025179	-0.0755831	0.226611	0.176253	0.176253	0.276969	-0.201432	0.075537	0.201432	0.050358	-0.201432	0.276969	0.176253	0.025179	0.176253	-0.176253	0.226611	-0.276969	-0.125895	-0.151074	0.125895	0.226611	-0.25179	0.125914	0.226611	0.327327	0.327327	0.302148	0.025179	0.050358	0.302148	0.25179	0.276969	0.276969	-0.151074	-0.125895	0.302148	0.25179	0.151074	0.25179	0.276969	0.125972	0.327327	0.226611	0.327327	0.302148	0.327327	0.302148
K12517	0.075537	-0.025179	-0.0755831	0.226611	0.176253	0.176253	0.276969	-0.201432	0.075537	0.201432	0.050358	-0.201432	0.276969	0.176253	0.025179	0.176253	-0.176253	0.226611	-0.276969	-0.125895	-0.151074	0.125895	0.226611	-0.25179	0.125914	0.226611	0.327327	0.327327	0.302148	0.025179	0.050358	0.302148	0.25179	0.276969	0.276969	-0.151074	-0.125895	0.302148	0.25179	0.151074	0.25179	0.276969	0.125972	0.327327	0.226611	0.327327	0.302148	0.327327	0.302148
K09804	0	0	0	0	0	0	0	0	0	0	0	-0.414782	0	0	0	0	0	0	0	0	0	0	0	0	0	0	0	-0.409828	-0.520616	0	0	-0.38731	0	-0.41298	0	0	0	0	0	0	-0.435048	0	0	0	0	0	0	0	0
K12989	0	0	0	0	0	0	0	0	0	0	0	0	0	0	0	0	0	0	0	0	0	0	0	0	0	0	0	0	0	0	0	0	0	0	0	0	0	0	0	0	0	0	0	0	0	0	0	0	0
K12988	0	0	0	0	0	0	0	0	0	0	0	0	0	0	0	0	0	0	0	0	0	0	0	0	0	0	0	0	0	0	0	0	0	0	0	0	0	0	0	0	0	0	0	0	0	0	0	0	0
K06118	-0.302148	-0.276969	-0.226749	-0.327327	-0.302148	-0.327327	-0.327327	-0.327327	-0.302148	-0.327327	-0.327327	-0.327327	-0.327327	-0.327327	-0.327327	-0.201432	-0.226611	-0.327327	-0.25179	-0.226611	-0.25179	-0.25179	-0.327327	-0.276969	-0.314785	-0.302148	-0.201432	-0.276969	-0.276969	0.075537	-0.302148	-0.100716	0.025179	-0.327327	-0.327327	-0.125895	-0.327327	-0.327327	-0.327327	-0.327327	-0.327327	-0.327327	-0.302332	-0.327327	-0.176253	-0.327327	-0.276969	-0.327327	-0.302148
K11632	0	0	0	0	0	0	0	0	0	0	0	0	0	0	0	0	0	0	0	0	0	0	0	0	0	0	0	0	0	0	0	0	0	0	0	0	0	0	0	0	0	0	0	0	0	0	0	0	0
K11630	0	0	0	0	0	0	0	0	0	0	0	0	0	0	0	0	0	0	0	0	0	0	0	0	0	0	0	0	0	0	0	0	0	0	0	0	0	0	0	0	0	0	0	0	0	0	0	0	0
K11631	0	0	0	0	0	0	0	0	0	0	0	0	0	0	0	0	0	0	0	0	0	0	0	0	0	0	0	0	0	0	0	0	0	0	0	0	0	0	0	0	0	0	0	0	0	0	0	0	0
K09814	0	0	0	0	0	0	0	0	0	0	0	0	0	0	0	0	0	0	0	0	0	0	0	0	0	0	0	0	0	0	0	0	0	0	0	0	0	0	0	0	0	0	0	0	0	0	0	0	0
K09813	0	0	0	0	0	0	0	0	0	0	0	0	0	0	0	0	0	0	0	0	0	0	0	0	0	0	0	0	0	0	0	0	0	0	0	0	0	0	0	0	0	0	0	0	0	0	0	0	0
K01249	0	0	0	0	0	0	0	0	0	0	0	0	0	0	0	0	0	0	0	0	0	0	0	0	0	0	0	0	0	0	0	0	0	0	0	0	0	0	0	0	0	0	0	0	0	0	0	0	0
K00220	0	0	0	0	0	0	0	0	0	0	0	0	0	0	0	0	0	0	0	0	0	0	0	0	0	0	0	0	0	0	0	0	0	0	0	0	0	0	0	0	0	0	0	0	0	0	0	0	0
K12538	0	0	0	0	0	0	0	0	0	0	0	0	0	0	0	0	0	0	0	0	0	0	0	0	0	0	0	0	0	0	0	0	0	0	0	0	0	0	0	0	0	0	0	0	0	0	0	0	0
K12536	0	0	0	0	0	0	0	0	0	0	0	0	0	0	0	0	0	0	0	0	0	0	0	0	0	0	0	0	0	0	0	0	0	0	0	0	0	0	0	0	0	0	0	0	0	0	0	0	0
K12537	0	0	0	0	0	0	0	0	0	0	0	0	0	0	0	0	0	0	0	0	0	0	0	0	0	0	0	0	0	0	0	0	0	0	0	0	0	0	0	0	0	0	0	0	0	0	0	0	0
K10975	0	0	0	0	0	0	0	0	0	0	0	0	0	0	0	0	0	0	0	0	0	0	0	0	0	0	0	0	0	0	0	0	0	0	0	0	0	0	0	0	0	0	0	0	0	0	0	0	0
K00315	0	0	0	0	0	0	0	0	0	0	0	0	0	0	0	0	0	0	0	0	0	0	0	0	0	0	0	0	0	0	0	0	0	0	0	0	0	0	0	0	0	0	0	0	0	0	0	0	0
K09860	0	0	0	0	0	0	0	-0.371997	0	0	0	-0.416583	0	0	0	0	0	0	0	0	0	0	0	0	0	0	0	-0.402622	-0.522418	0	0	-0.386409	0	-0.416583	0	0	0	0	0	0	-0.435948	0	0	0	0	0	0	0	0
K10020	0	0	0	0	0	0	0	0	0	0	0	0	0	0	0	0	0	0	0	0	0	0	0	0	0	0	0	0	0	0	0	0	0	0	0	0	0	0	0	0	0	0	0	0	0	0	0	0	0
K10022	0	0	0	0	0	0	0	0	0	0	0	0	0	0	0	0	0	0	0	0	0	0	0	0	0	0	0	0	0	0	0	0	0	0	0	0	0	0	0	0	0	0	0	0	0	0	0	0	0
K10023	0	0	0	0	0	0	0	0	0	0	0	0	0	0	0	0	0	0	0	0	0	0	0	0	0	0	0	0	0	0	0	0	0	0	0	0	0	0	0	0	0	0	0	0	0	0	0	0	0
K10024	0	0	0	0	0	0	0	0	0	0	0	0	0	0	0	0	0	0	0	0	0	0	0	0	0	0	0	0	0	0	0	0	0	0	0	0	0	0	0	0	0	0	0	0	0	0	0	0	0
K10025	0	0	0	0	0	0	0	0	0	0	0	0	0	0	0	0	0	0	0	0	0	0	0	0	0	0	0	0	0	0	0	0	0	0	0	0	0	0	0	0	0	0	0	0	0	0	0	0	0
K01477	0	0	0	0	0	0	0	0	0	0	0	0	0	0	0	0	0	0	0	0	0	0	0	0	0	0	0	0	0	0	0	0	0	0	0	0	0	0	0	0	0	0	0	0	0	0	0	0	0
K03302	0	0	0	0	0	0	0	0	0	0	0	0	0	0	0	0	0	0	0	0	0	0	0	0	0	0	0	0	0	0	0	0	0	0	0	0	0	0	0	0	0	0	0	0	0	0	0	0	0
K10565	0	0	0	0	0	0	0	0	0	0	0	0	0	0	0	0	0	0	0	0	0	0	0	0	0	0	0	0	0	0	0	0	0	0	0	0	0	0	0	0	0	0	0	0	0	0	0	0	0
K10564	0	0	0	0	0	0	0	0	0	0	0	0	0	0	0	0	0	0	0	0	0	0	0	0	0	0	0	0	0	0	0	0	0	0	0	0	0	0	0	0	0	0	0	0	0	0	0	0	0
K07228	0	0	0	0	0	0	0	0	0	0	0	0	0	0	0	0	0	0	0	0	0	0	0	0	0	0	0	0	0	0	0	0	0	0	0	0	0	0	0	0	0	0	0	0	0	0	0	0	0
K00028	0	0	0	0	0	0	0	0	0	0	0	0	0	0	0	0	0	0	0	0	0	0	0	0	0	0	0	0	0	0	0	0	0	0	0	0	0	0	0	0	0	0	0	0	0	0	0	0	0
K12552	0	0	0	0	0	0	0	0	0	0	0	0	0	0	0	0	0	0	0	0	0	0	0	0	0	0	0	0	0	0	0	0	0	0	0	0	0	0	0	0	0	0	0	0	0	0	0	0	0
K12553	0	0	0	0	0	0	0	0	0	0	0	0	0	0	0	0	0	0	0	0	0	0	0	0	0	0	0	0	0	0	0	0	0	0	0	0	0	0	0	0	0	0	0	0	0	0	0	0	0
K12551	0	0	0	0	0	0	0	0	0	0	0	0	0	0	0	0	0	0	0	0	0	0	0	0	0	0	0	0	0	0	0	0	0	0	0	0	0	0	0	0	0	0	0	0	0	0	0	0	0
K10954	0.396933	0	0	0.181455	0.489928	0	0.190528	0.150456	0	0.292596	0.179187	0	0.44154	0.274451	0.165578	0.308473	0	0.246476	0	0	0.201112	0	0.238916	-0.251013	0.228366	0.215478	0	0	0.353081	-0.130043	0.255549	0.210185	0.130043	0.346276	0.330399	0	0.176919	0.54134	0.409786	0.248744	0.347032	0.292596	0	0.185991	0	0.539828	0.359129	0.532268	0.582924
K00499	0.396933	0	0	0.181455	0.489928	0	0.190528	0.150456	0	0.292596	0.179187	0	0.44154	0.274451	0.165578	0.308473	0	0.246476	0	0	0.201112	0	0.238916	-0.251013	0.228366	0.215478	0	0	0.353081	-0.130043	0.255549	0.210185	0.130043	0.346276	0.330399	0	0.176919	0.54134	0.409786	0.248744	0.347032	0.292596	0	0.185991	0	0.539828	0.359129	0.532268	0.582924
K00496	0	0	0	0	0	0	0	0	0	0	0	0	0	0	0	0	0	0	0	0	0	0	0	0	0	0	0	0	0	0	0	0	0	0	0	0	0	0	0	0	0	0	0	0	0	0	0	0	0
K00491	0	0	0	0	0	0	0	0	0	0	0	0	0	0	0	0	0	0	0	0	0	0	0	0	0	0	0	0	0	0	0	0	0	0	0	0	0	0	0	0	0	0	0	0	0	0	0	0	0
K00493	0.396177	-0.108873	-0.0446349	0.132311	0.488416	0.0211697	0.166334	0.120214	0.0355349	0.260841	0.177675	0.0544365	0.409786	0.274451	0.127774	0.278231	0.0740941	0.215478	-0.0945078	-0.0756062	0.168602	-0.0559486	0.215478	-0.237403	0.217023	0.210185	-0.0506562	0.085435	0.322082	-0.142896	0.238916	0.191284	0.138359	0.314522	0.328887	-0.060485	0.168602	0.534536	0.410542	0.219258	0.333423	0.278231	0.0325305	0.171626	0.0309985	0.525463	0.355349	0.536048	0.58746
K07055	0	0	0	0	0	0	0	0	0	0	0	0	0	0	0	0	0	0	0	0	0	0	0	0	0	0	0	0	0	0	0	0	0	0	0	0	0	0	0	0	0	0	0	0	0	0	0	0	0
K07059	0	0	0	0	0	0	0	0	0	0	0	0	0	0	0	0	0	0	0	0	0	0	0	0	0	0	0	0	0	0	0	0	0	0	0	0	0	0	0	0	0	0	0	0	0	0	0	0	0
K01454	0	0	0	0	0	0	0	0	0	0	0	0	0	0	0	0	0	0	0	0	0	0	0	0	0	0	0	0	0	0	0	0	0	0	0	0	0	0	0	0	0	0	0	0	0	0	0	0	0
K04756	0	0	0	0	0	0	0	0	0	0	0	0	0	0	0	0	0	0	0	0	0	0	0	0	0	0	0	0	0	0	0	0	0	0	0	0	0	0	0	0	0	0	0	0	0	0	0	0	0
K10810	0	0	0	0	0	0	0	0	0	0	0	0	0	0	0	0	0	0	0	0	0	0	0	0	0	0	0	0	0	0	0	0	0	0	0	0	0	0	0	0	0	0	0	0	0	0	0	0	0
K10725	0	0	0	0	0	0	0	0	0	0	0	0	0	0	0	0	0	0	0	0	0	0	0	0	0	0	0	0	0	0	0	0	0	0	0	0	0	0	0	0	0	0	0	0	0	0	0	0	0
K08295	0.396177	-0.108873	-0.0446349	0.132311	0.488416	0.0211697	0.166334	0.120214	0.0355349	0.260841	0.177675	0.0544365	0.409786	0.274451	0.127774	0.278231	0.0740941	0.215478	-0.0945078	-0.0756062	0.168602	-0.0559486	0.215478	-0.237403	0.217023	0.210185	-0.0506562	0.085435	0.322082	-0.142896	0.238916	0.191284	0.138359	0.314522	0.328887	-0.060485	0.168602	0.534536	0.410542	0.219258	0.333423	0.278231	0.0325305	0.171626	0.0309985	0.525463	0.355349	0.536048	0.58746
K14584	0.396933	0	0	0.181455	0.489928	0	0.190528	0.150456	0	0.292596	0.179187	0	0.44154	0.274451	0.165578	0.308473	0	0.246476	0	0	0.201112	0	0.238916	-0.251013	0.228366	0.215478	0	0	0.353081	-0.130043	0.255549	0.210185	0.130043	0.346276	0.330399	0	0.176919	0.54134	0.409786	0.248744	0.347032	0.292596	0	0.185991	0	0.539828	0.359129	0.532268	0.582924
K09190	0	0	0	0	0	0	0	0	0	0	0	0	0	0	0	0	0	0	0	0	0	0	0	0	0	0	0	0	0	0	0	0	0	0	0	0	0	0	0	0	0	0	0	0	0	0	0	0	0
K14749	0.396933	0	0	0.181455	0.489928	0	0.190528	0.150456	0	0.292596	0.179187	0	0.44154	0.274451	0.165578	0.308473	0	0.246476	0	0	0.201112	0	0.238916	-0.251013	0.228366	0.215478	0	0	0.353081	-0.130043	0.255549	0.210185	0.130043	0.346276	0.330399	0	0.176919	0.54134	0.409786	0.248744	0.347032	0.292596	0	0.185991	0	0.539828	0.359129	0.532268	0.582924
K14743	0	0	0	0	0	0	0	0	0	0	0	0	0	0	0	0	0	0	0	0	0	0	0	0	0	0	0	0	0	0	0	0	0	0	0	0	0	0	0	0	0	0	0	0	0	0	0	0	0
K02164	0	0	0	0	0	0	0	0	0	0	0	0	0	0	0	0	0	0	0	0	0	0	0	0	0	0	0	0	0	0	0	0	0	0	0	0	0	0	0	0	0	0	0	0	0	0	0	0	0
K07268	0	-0.179733	-0.129447	-0.0780159	0.069128	-0.192571	0.145169	-0.170845	-0.222197	0.316014	-0.209359	-0.111592	0.128381	0.390079	-0.0780159	0.400942	-0.12048	0.092829	-0.12048	-0.230097	0.390079	-0.210347	0.363416	-0.102704	-0.0622247	0.451307	-0.315026	-0.0632027	0.226147	-0.303176	-0.134306	-0.0780159	-0.197509	-0.109617	0.255774	-0.232073	-0.207384	0.198496	0.303176	0.11258	-0.0997418	0.307126	0.181819	0	-0.192571	0.236023	-0.265649	0	0.247873
K04478	0	0	0	0	0	0	0	0	0	0	0	0	0	0	0	0	0	0	0	0	0	0	0	0	0	0	0	0	0	0	0	0	0	0	0	0	0	0	0	0	0	0	0	0	0	0	0	0	0
K08261	0	0	0	0	0	0	0	0	0	0	0	0	0	0	0	0	0	0	0	0	0	0	0	0	0	0	0	0	0	0	0	0	0	0	0	0	0	0	0	0	0	0	0	0	0	0	0	0	0
K02572	0	0	0	0	0	0	0	0	0	0	0	0	0	0	0	0	0	0	0	0	0	0	0	0	0	0	0	0	0	0	0	0	0	0	0	0	0	0	0	0	0	0	0	0	0	0	0	0	0
K01143	0.297912	-0.240439	0	0	0.408856	0	0	0	0	0.401945	0	0	0.298276	0.411766	0	0.417222	0	0	-0.236438	0	0	0	0.313917	-0.389577	0	0.245532	0	0	0.43541	0	0	0	0	0	0.453961	0	0	0.51689	0.541625	0.344472	0.270995	0.421951	0	0.27827	0	0.640929	0.316827	0.557267	0.646749
K13238	0	0	0	0	0	0	0	0	0	0	0	0	0	0	0	0	0	0	0	0	0	0	0	0	0	0	0	0	0	0	0	0	0	0	0	0	0	0	0	0	0	0	0	0	0	0	0	0	0
K13797	0	0	0	0	0	0	0	-0.371997	0	0	0	-0.416583	0	0	0	0	0	0	0	0	0	0	0	0	0	0	0	-0.402622	-0.522418	0	0	-0.386409	0	-0.416583	0	0	0	0	0	0	-0.435948	0	0	0	0	0	0	0	0
K09944	0	0	0	0	0	0	0	-0.371997	0	0	0	-0.416583	0	0	0	0	0	0	0	0	0	0	0	0	0	0	0	-0.402622	-0.522418	0	0	-0.386409	0	-0.416583	0	0	0	0	0	0	-0.435948	0	0	0	0	0	0	0	0
K09947	0.386348	-0.108117	-0.0453914	0.1497	0.482368	0.0234379	0.182967	0.0967759	0.0317546	0.272182	0.168602	0.0309985	0.418858	0.279743	0.122482	0.286548	0.0551925	0.221526	-0.113409	-0.0839229	0.185991	-0.0468758	0.21699	-0.247232	0.23139	0.239672	-0.0665335	0.0718259	0.317546	-0.163309	0.225306	0.190528	0.118702	0.314522	0.327375	-0.0899714	0.141384	0.536048	0.406005	0.207917	0.313766	0.281255	0.0514436	0.172382	0.0211697	0.526219	0.348545	0.536048	0.590484
K10851	0	0	0	0	0	0	0	0	0	0	0	0	0	0	0	0	0	0	0	0	0	0	0	0	0	0	0	0	0	0	0	0	0	0	0	0	0	0	0	0	0	0	0	0	0	0	0	0	0
K10850	0	0	0	0	0	0	0	0	0	0	0	0	0	0	0	0	0	0	0	0	0	0	0	0	0	0	0	0	0	0	0	0	0	0	0	0	0	0	0	0	0	0	0	0	0	0	0	0	0
K14974	0.396933	-0.100556	-0.0378262	0.14214	0.492952	0.0325107	0.169358	0.12097	0.0438516	0.26311	0.188259	0.0551925	0.411298	0.272182	0.131555	0.278987	0.0778744	0.220014	-0.0937517	-0.0748501	0.155749	-0.0438516	0.218502	-0.23816	0.217779	0.207917	-0.0317546	0.105093	0.331155	-0.133067	0.244964	0.202625	0.153481	0.322082	0.339472	-0.0551925	0.173138	0.540584	0.41659	0.227575	0.350057	0.282767	0.0287479	0.181455	0.0438516	0.532268	0.363666	0.539072	0.588972
K00590	0	0	0	0	0	0	0	0	0	0	0	0	0	0	0	0	0	0	0	0	0	0	0	0	0	0	0	0	0	0	0	0	0	0	0	0	0	0	0	0	0	0	0	0	0	0	0	0	0
K07653	0	0	0	0	0	0	0	0	0	0	0	0	0	0	0	0	0	0	0	0	0	0	0	0	0	0	0	0	0	0	0	0	0	0	0	0	0	0	0	0	0	0	0	0	0	0	0	0	0
K00561	0	0	0	0	0	0	0	0	0	0	0	0	0	0	0	0	0	0	0	0	0	0	0	0	0	0	0	0	0	0	0	0	0	0	0	0	0	0	0	0	0	0	0	0	0	0	0	0	0
K01167	0.396933	0	0	0.181455	0.489928	0	0.190528	0.150456	0	0.292596	0.179187	0	0.44154	0.274451	0.165578	0.308473	0	0.246476	0	0	0.201112	0	0.238916	-0.251013	0.228366	0.215478	0	0	0.353081	-0.130043	0.255549	0.210185	0.130043	0.346276	0.330399	0	0.176919	0.54134	0.409786	0.248744	0.347032	0.292596	0	0.185991	0	0.539828	0.359129	0.532268	0.582924
K12255	0	0	0	0	0	0	0	0	0	0	0	0	0	0	0	0	0	0	0	0	0	0	0	0	0	0	0	0	0	0	0	0	0	0	0	0	0	0	0	0	0	0	0	0	0	0	0	0	0
K12254	0	0	0	0	0	0	0	0	0	0	0	0	0	0	0	0	0	0	0	0	0	0	0	0	0	0	0	0	0	0	0	0	0	0	0	0	0	0	0	0	0	0	0	0	0	0	0	0	0
K12252	0	0	0	0	0	0	0	0	0	0	0	0	0	0	0	0	0	0	0	0	0	0	0	0	0	0	0	0	0	0	0	0	0	0	0	0	0	0	0	0	0	0	0	0	0	0	0	0	0
K12070	0.396933	0	0	0.181455	0.489928	0	0.190528	0.150456	0	0.292596	0.179187	0	0.44154	0.274451	0.165578	0.308473	0	0.246476	0	0	0.201112	0	0.238916	-0.251013	0.228366	0.215478	0	0	0.353081	-0.130043	0.255549	0.210185	0.130043	0.346276	0.330399	0	0.176919	0.54134	0.409786	0.248744	0.347032	0.292596	0	0.185991	0	0.539828	0.359129	0.532268	0.582924
K02829	0	0	0	0	0	0	0	0	0	0	0	0	0	0	0	0	0	0	0	0	0	0	0	0	0	0	0	0	0	0	0	0	0	0	0	0	0	0	0	0	0	0	0	0	0	0	0	0	0
K02827	0	0	0	0	0	0	0	0	0	0	0	0	0	0	0	0	0	0	0	0	0	0	0	0	0	0	0	0	0	0	0	0	0	0	0	0	0	0	0	0	0	0	0	0	0	0	0	0	0
K02826	0	0	0	0	0	0	0	0	0	0	0	0	0	0	0	0	0	0	0	0	0	0	0	0	0	0	0	0	0	0	0	0	0	0	0	0	0	0	0	0	0	0	0	0	0	0	0	0	0
K01406	0	0	0	0	0	0	0	0	0	0	0	0	0	0	0	0	0	0	0	0	0	0	0	0	0	0	0	0	0	0	0	0	0	0	0	0	0	0	0	0	0	0	0	0	0	0	0	0	0
Only the part selected for plotting:
	Lipid_17	Lipid_19	Lipid_44	Lipid_63	Lipid_89		Categories
K05597	0	0	0.281907	0.544535	0.56054	glutamin-(asparagin-)ase [EC:3.5.1.38]	Cat 1
K01347	-0.12048	-0.12048	0	0.396005	0.419706	IgA-specific serine endopeptidase [EC:3.4.21.72]	Cat 1
K08690	0	0	0.185991	0.468758	0.517146	cis-2,3-dihydrobiphenyl-2,3-diol dehydrogenase [EC:1.3.1.56]	Cat 1
K11740	0	0	0.185991	0.468758	0.517146	bacteriophage N4 adsorption protein B	Cat 1
K09929	0	0	0.406761	0.534536	0.563266	hypothetical protein	Cat 1
K06945	0	-0.236438	0.27827	0.57509	0.605282	None	Cat 1
K08721	0.0778744	-0.0937517	0.181455	0.446833	0.50883	multidrug resistance outer membrane protein OprJ	Cat 1
K04110	0.0778744	-0.0937517	0.181455	0.446833	0.50883	benzoate-CoA ligase [EC:6.2.1.25]	Cat 1
K01707	0	0	0	0.471421	0.464874	5-dehydro-4-deoxyglucarate dehydratase [EC:4.2.1.41]	Cat 1
K10228	0	-0.254626	0.26372	0.580183	0.619832	sorbitol/mannitol transport system permease protein	Cat 1
K10229	0	-0.254626	0.26372	0.580183	0.619832	sorbitol/mannitol transport system permease protein	Cat 1
K10227	0	-0.266266	0.270267	0.576545	0.613284	sorbitol/mannitol transport system substrate-binding protein	Cat 1
K02234	0	0	0	0.474807	0.530756	cobalamin biosynthesis protein CobW	Cat 1
K11898	0	0	0.185991	0.468758	0.517146	type VI secretion system protein ImpE	Cat 1
K11897	0.0514122	-0.0884593	0.176162	0.46649	0.51639	type VI secretion system protein ImpF	Cat 1
K12994	0.0317546	-0.108873	0.198088	0.470271	0.517902	alpha-1,3-rhamnosyltransferase [EC:2.4.1.-]	Cat 1
K14585	0	0	0.185991	0.468758	0.517146	trans-o-hydroxybenzylidenepyruvate hydratase-aldolase [EC:4.1.2.45]	Cat 1
K09925	0	0	0.185991	0.468758	0.517146	hypothetical protein	Cat 1
K00256	0.0317546	-0.108873	0.198088	0.470271	0.517902	isoquinoline 1-oxidoreductase [EC:1.3.99.16]	Cat 1
K11949	0	0	0.185991	0.468758	0.517146	4-(2-carboxyphenyl)-2-oxobut-3-enoate aldolase [EC:4.1.2.34]	Cat 1
K07231	0.0551925	-0.113409	0.172382	0.452881	0.522439	putative iron-regulated protein	Cat 1
K06882	0	0	0	-0.348128	0	None	Cat 1
K04016	-0.12048	-0.12048	0	0.396005	0.419706	formate-dependent nitrite reductase, possible assembly protein; cytochrome c-type protein NrfE	Cat 1
K14750	0	0	0.185991	0.468758	0.517146	ethylbenzene dioxygenase ferredoxin component	Cat 1
K14751	0	0	0.185991	0.468758	0.517146	2,3-dihydroxyethylbenzene 1,2-dioxygenase [EC:1.13.11.-]	Cat 1
K00154	0	0	0.29573	0.537988	0.54308	coniferyl-aldehyde dehydrogenase [EC:1.2.1.68]	Cat 1
K05523	0	0	0	0.613264	0.612276	molecular chaperone HchA (Hsp31)	Cat 1
K02480	0	0	0.185991	0.468758	0.517146	two-component system, NarL family, sensor kinase [EC:2.7.13.3]	Cat 1
K09950	0	0	0.568544	0.489638	0.513592	hypothetical protein	Cat 1
K14579	0	0	0.185991	0.468758	0.517146	naphthalene 1,2-dioxygenase subunit alpha [EC:1.14.12.12]	Cat 1
K12062	0	0	0	0.471421	0.464874	conjugal transfer pilin signal peptidase TrbI	Cat 1
K12064	0	0	0	0.471421	0.464874	conjugal transfer pilus assembly protein TraV	Cat 1
K12065	0	0	0	0.471421	0.464874	conjugal transfer pilus assembly protein TraB	Cat 1
K07256	0.0514122	-0.0884593	0.176162	0.46649	0.51639	taurine dehydrogenase large subunit [EC:1.4.2.-]	Cat 1
K01617	0	0	0	0.472149	0.470694	4-oxalocrotonate decarboxylase [EC:4.1.1.77]	Cat 1
K09709	0	0	0	0.446833	0.50883	hypothetical protein; mesaconyl-C4 CoA hydratase	Cat 1
K01483	0	0	0.253534	0.511798	0.553993	ureidoglycolate hydrolase [EC:3.5.3.19]	Cat 1
K09461	0.0740941	-0.0945078	0.171626	0.444564	0.508074	anthraniloyl-CoA monooxygenase [EC:1.14.13.40]	Cat 1
K09926	-0.0298276	-0.133497	0.264447	0.51107	0.535805	hypothetical protein	Cat 1
K07338	0.0551925	-0.113409	0.172382	0.452881	0.522439	hypothetical protein	Cat 1
K09990	0	0	0.260082	0.51398	0.542353	hypothetical protein	Cat 1
K01504	-0.247187	-0.333311	0.272353	0.434534	0.421672	glucosamine-6-phosphate isomerase [EC:3.5.99.6]	Cat 1
K04102	0.0778744	-0.0937517	0.181455	0.446833	0.50883	4,5-dihydroxyphthalate decarboxylase [EC:4.1.1.55]	Cat 1
K00126	0.0627531	-0.104337	0.16709	0.447589	0.514878	formate dehydrogenase, delta subunit [EC:1.2.1.2]	Cat 1
K00141	0	-0.22444	0	0	0.227128	benzaldehyde dehydrogenase (NAD) [EC:1.2.1.28]	Cat 1
K03285	-0.12048	-0.12048	0	0.396005	0.419706	general bacterial porin, GBP family	Cat 1
K05550	0	-0.22444	0	0	0.227128	benzoate 1,2-dioxygenase beta subunit [EC:1.14.12.10]	Cat 1
K00207	0	0	0	0.474807	0.530756	dihydropyrimidine dehydrogenase (NADP+) [EC:1.3.1.2]	Cat 1
K10954	0	0	0.185991	0.468758	0.517146	zona occludens toxin	Cat 1
K00499	0	0	0.185991	0.468758	0.517146	choline monooxygenase [EC:1.14.15.7]	Cat 1
K00493	0.0740941	-0.0945078	0.171626	0.444564	0.508074	unspecific monooxygenase [EC:1.14.14.1]	Cat 1
K08295	0.0740941	-0.0945078	0.171626	0.444564	0.508074	2-aminobenzoate-CoA ligase [EC:6.2.1.32]	Cat 1
K14584	0	0	0.185991	0.468758	0.517146	2-hydroxychromene-2-carboxylate isomerase [EC:5.99.1.4]	Cat 1
K14749	0	0	0.185991	0.468758	0.517146	ethylbenzene dioxygenase beta subunit [EC:1.14.12.-]	Cat 1
K07268	-0.12048	-0.12048	0	0.396005	0.419706	opacity associated protein	Cat 1
K01143	0	-0.236438	0.27827	0.57509	0.605282	exodeoxyribonuclease (lambda-induced) [EC:3.1.11.3]	Cat 1
K09947	0.0551925	-0.113409	0.172382	0.452881	0.522439	hypothetical protein	Cat 1
K14974	0.0778744	-0.0937517	0.181455	0.446833	0.50883	6-hydroxynicotinate 3-monooxygenase [EC:1.14.13.114]	Cat 1
K01167	0	0	0.185991	0.468758	0.517146	ribonuclease T1 [EC:3.1.27.3]	Cat 1
K12070	0	0	0.185991	0.468758	0.517146	conjugal transfer pilus assembly protein TraI	Cat 1
K03433	-0.257817	-0.314522	0.381055	0.223794	0.303181	proteasome beta subunit [EC:3.4.25.1]	Cat 2
K04335	-0.176253	-0.276969	0.327327	0.327327	0.327327	minor curlin subunit	Cat 7
K04338	-0.176253	-0.276969	0.327327	0.327327	0.327327	curli production assembly/transport component CsgF	Cat 7
K04337	-0.176253	-0.276969	0.327327	0.327327	0.327327	curli production assembly/transport component CsgE	Cat 7
K05548	-0.176253	-0.276969	0.327327	0.327327	0.327327	MFS transporter, AAHS family, benzoate transport protein	Cat 7
K11935	-0.176253	-0.276969	0.327327	0.327327	0.327327	biofilm PGA synthesis protein PgaA	Cat 7
K08686	-0.176253	-0.276969	0.327327	0.327327	0.327327	2-chlorobenzoate 1,2-dioxygenase [EC:1.14.12.13]	Cat 7
K14347	-0.176253	-0.276969	0.327327	0.327327	0.327327	solute carrier family 10 (sodium/bile acid cotransporter), member 7	Cat 7
K06135	-0.176253	-0.276969	0.327327	0.327327	0.327327	pyrroloquinoline quinone biosynthesis protein A	Cat 7
K12518	-0.176253	-0.276969	0.327327	0.327327	0.327327	outer membrane usher protein PapC	Cat 7
K08354	-0.176253	-0.276969	0.327327	0.327327	0.327327	thiosulfate reductase cytochrome b subunit	Cat 7
K13472	-0.176253	-0.276969	0.327327	0.327327	0.327327	sulfotransferase	Cat 7
K05877	-0.176253	-0.276969	0.327327	0.327327	0.327327	methyl-accepting chemotaxis protein IV, peptide sensor receptor	Cat 7
K12519	-0.176253	-0.276969	0.327327	0.327327	0.327327	chaperone protein PapD	Cat 7
K12517	-0.176253	-0.276969	0.327327	0.327327	0.327327	major pilin subunit PapA	Cat 7
K01828	0.0228472	-0.205625	-0.279543	-0.34674	-0.262071	None	Cat 9
K12428	-0.226611	-0.25179	-0.327327	-0.276969	-0.327327	fatty acid CoA ligase FadD32	Cat 9
K01668	0.327327	0.327327	0	0.302148	0.276969	tyrosine phenol-lyase [EC:4.1.99.2]	Cat 9
K12136	0.327327	0.327327	0	0.302148	0.276969	hydrogenase-4 component A [EC:1.-.-.-]	Cat 9
K00785	0.327327	0.327327	0	0.302148	0.276969	beta-galactosamide-alpha-2,3-sialyltransferase [EC:2.4.99.-]	Cat 9
K12437	-0.226611	-0.25179	-0.327327	-0.276969	-0.327327	polyketide synthase 13	Cat 9
K12145	0.327327	0.327327	0	0.302148	0.276969	hydrogenase-4 component J [EC:1.-.-.-]	Cat 9
K12144	0.327327	0.327327	0	0.302148	0.276969	hydrogenase-4 component I [EC:1.-.-.-]	Cat 9
K12142	0.327327	0.327327	0	0.302148	0.276969	hydrogenase-4 component G [EC:1.-.-.-]	Cat 9
K12107	0.327327	0.327327	0	0.302148	0.276969	cag pathogenicity island protein 22	Cat 9
K05556	-0.226611	-0.25179	-0.327327	-0.276969	-0.327327	hydroxylacyl-CoA dehydrogenase [EC:1.1.1.-]; ketoreductase RED1 [EC:1.1.1.-]	Cat 9
K06118	-0.226611	-0.25179	-0.327327	-0.276969	-0.327327	UDP-sulfoquinovose synthase [EC:3.13.1.1]	Cat 9
	LPC 20:5	LPC 20:3	LPI 16:0	PC 37:4	SE 20:4
[truncated: 73 more columns]

## Sheet: Protein_Metadata_Correlations
	body weight (g)	lean mass	fat mass	Gastrocnemius muscle mass (g)	Sciatic response amplitude (mV)	Triceps muscle mass (g)	Radial response amplitude (mV)	Heart muscle mass	B12 total (pmol/L)	folate level (nmol/L)
MIA	-0.21978	0.413919	-0.34127	0.652625	0.41514	0	0	0	0.502367	0
CSF3R	0.519536	-0.70696	0.62149	-0.592796	-0.487179	0	0	0	-0.29745	0
SIGLEC6	0.374237	-0.612943	0.532967	-0.379121	-0.364469	0	0	0	-0.343564	0
GDF11	-0.608059	0.636142	-0.557387	0.826618	0.561661	0	0	0	0.616888	0
MMP3	0.404518	-0.628606	0.535491	-0.365135	-0.451534	0	0	0	-0.23931	0
COMMD7	0.137363	-0.02442	-0.0757021	-0.195971	-0.138584	0	0	0	-0.240037	0
WIF1	-0.365079	0.561661	-0.522589	0.593407	0.471306	0	0	0	0.408917	-0.523199
C5	0.541514	-0.681319	0.611111	-0.581807	-0.532357	0	0	0	-0.358528	0
KPNA2	0.321123	-0.500611	0.426129	-0.362637	-0.257021	0	0	0	-0.360055	0
TNFSF11	0.376068	-0.388278	0.302198	-0.59768	-0.443223	0	0	0	-0.486487	0
TNFSF15	0.319292	-0.373626	0.343101	-0.557387	-0.506716	0	0	0	-0.317606	0
CNTN1	-0.304029	0.420635	-0.359585	0.650794	0.530525	0	0	0	0.484654	0
IL1B	-0.285714	0.526862	-0.398046	0.425519	0.236874	0	0	0	0.560086	0
WISP1	-0.595238	0.674603	-0.600733	0.647741	0.496337	0	0	0	0.404031	0
IL18BP	0.336437	-0.255228	0.223477	-0.368188	-0.363609	0	0	0	-0.124618	0
EDA2R	0.649977	-0.676233	0.607846	-0.784613	-0.678064	0	0	0	-0.500305	0
HAPLN1	-0.233552	0.497939	-0.422531	0.60174	0.411846	0	0	0	0.397373	0
ASAH2	0.526862	-0.65873	0.595238	-0.710012	-0.594017	0	0	0	-0.439456	0
RET	0.327328	-0.216183	0.204275	-0.599084	-0.374046	0	0	0	-0.357416	0
CD48	-0.478779	0.513893	-0.406718	0.499847	0.384122	0	0	0	0.371773	0
IGFBP7	0.199023	-0.275336	0.19475	-0.369353	-0.342491	0	0	0	-0.372576	0
THBS4	-0.210623	0.347375	-0.315018	0.58486	0.192918	0	0	0	0.496564	0
ABL1	0.525641	-0.757021	0.648352	-0.615995	-0.522589	0	0	0	-0.428157	0
ACY1	-0.0360195	-0.266178	0.192308	-0.0940171	-0.144078	0	0	0	-0.18415	0
IL17RD	0.33374	-0.572824	0.508092	-0.491298	-0.426565	0	0	0	-0.431801	0
DKK1	-0.106838	0.286325	-0.211233	0.456044	0.262515	0	0	0	0.429073	0
PTH	0.592796	-0.664835	0.59768	-0.727106	-0.521368	0	0	0	-0.413804	0
CA9	-0.545566	0.65303	-0.583117	0.700351	0.414288	0	0	0	0.374771	0
DMP1	0.577534	-0.635531	0.612332	-0.612943	-0.525031	0	0	0	-0.181402	0
FGFR3	0.392977	-0.523969	0.476641	-0.41313	-0.385344	0	0	0	-0.279976	0
MATK	-0.31873	0.569379	-0.438712	0.47321	0.34987	0	0	0	0.444716	0
CFB	-0.327278	0.30835	-0.218898	0.585865	0.376126	0	0	0	0.475565	0
IGF1R	-0.147741	0.29243	-0.275336	0.406593	0.273504	0	0	0	0.415636	0
NME1	0.46337	-0.600733	0.492063	-0.592186	-0.467643	0	0	0	-0.429379	0
P4HB	-0.40635	0.605404	-0.581591	0.554419	0.411235	0	0	0	0.410202	0
PSMA2	0.334708	-0.554894	0.436708	-0.341121	-0.287678	0	0	0	-0.420562	0
AMN	0.539072	-0.728938	0.603175	-0.6337	-0.480464	0	0	0	-0.590319	0
SAA1	0.501298	-0.704015	0.612731	-0.593497	-0.448176	0	0	0	-0.305742	0
CHST2	0.0610594	-0.484506	0.40055	-0.180736	-0.245153	0	0	0	-0.318265	0
CBX5	0.277557	-0.545038	0.481527	-0.505649	-0.351145	0	0	0	-0.463877	0
CSN1S1	0.374599	-0.624943	0.531522	-0.441765	-0.361777	0	0	0	-0.478772	0
LTA	0.471306	-0.718559	0.588523	-0.514042	-0.528694	0	0	0	-0.378684	0
TXNDC12	0.263736	-0.504884	0.407814	-0.283883	-0.331502	0	0	0	-0.252863	0
EPHA2	-0.276378	0.459307	-0.423882	0.419911	0.456864	0	0	0	0.275741	0
VEGFA	0.150534	-0.461679	0.518473	-0.433893	-0.460763	0	0	0	-0.317703	0
HBA1 HBB	-0.205128	0.284493	-0.214896	0.249695	0.0201465	0	0	0	0.025042	0
ERAP1	0.428026	-0.468631	0.44726	-0.610289	-0.51931	0	0	0	-0.44212	0
ATP5B	0.337607	-0.565324	0.485958	-0.489011	-0.47619	0	0	0	-0.425714	0
HPGD	0.446955	-0.492444	0.396581	-0.546787	-0.552893	0	0	0	-0.238699	0
TNFRSF25	-0.391331	0.474969	-0.401099	0.549451	0.47619	0	0	0	0.352115	0
EPHA10	-0.464662	0.454587	-0.373989	0.526637	0.301328	0	0	0	0.378742	0
IL20RA	0.591145	-0.698015	0.640305	-0.612214	-0.491298	0	0	0	-0.323812	0.501985
NOTCH1	-0.211233	0.401709	-0.286325	0.400488	0.45177	0	0	0	0.561918	0
PDK1	-0.392917	0.580064	-0.557472	0.533964	0.489696	0	0	0	0.354459	0
NR1D1	0.537241	-0.724664	0.664225	-0.660562	-0.56105	0	0	0	-0.335013	0
ELANE	-0.299328	0.444716	-0.364692	0.47526	0.302382	0	0	0	0.38686	0
Only the part selected for plotting:
	MIA	CSF3R	SIGLEC6	GDF11	MMP3	COMMD7	WIF1	C5	KPNA2	TNFSF11	TNFSF15	CNTN1	IL1B	WISP1	IL18BP	EDA2R	HAPLN1	ASAH2	RET	CD48	IGFBP7	THBS4	ABL1	ACY1	IL17RD	DKK1	PTH	CA9	DMP1	FGFR3	MATK	CFB	IGF1R	NME1	P4HB	PSMA2	AMN	SAA1	CHST2	CBX5	CSN1S1	LTA	TXNDC12	EPHA2	VEGFA	HBA1 HBB	ERAP1	ATP5B	HPGD
body weight (g)	-0.21978	0.519536	0.374237	-0.608059	0.404518	0.137363	-0.365079	0.541514	0.321123	0.376068	0.319292	-0.304029	-0.285714	-0.595238	0.336437	0.649977	-0.233552	0.526862	0.327328	-0.478779	0.199023	-0.210623	0.525641	-0.0360195	0.33374	-0.106838	0.592796	-0.545566	0.577534	0.392977	-0.31873	-0.327278	-0.147741	0.46337	-0.40635	0.334708	0.539072	0.501298	0.0610594	0.277557	0.374599	0.471306	0.263736	-0.276378	0.150534	-0.205128	0.428026	0.337607	0.446955
lean mass	0.413919	-0.70696	-0.612943	0.636142	-0.628606	-0.02442	0.561661	-0.681319	-0.500611	-0.388278	-0.373626	0.420635	0.526862	0.674603	-0.255228	-0.676233	0.497939	-0.65873	-0.216183	0.513893	-0.275336	0.347375	-0.757021	-0.266178	-0.572824	0.286325	-0.664835	0.65303	-0.635531	-0.523969	0.569379	0.30835	0.29243	-0.600733	0.605404	-0.554894	-0.728938	-0.704015	-0.484506	-0.545038	-0.624943	-0.718559	-0.504884	0.459307	-0.461679	0.284493	-0.468631	-0.565324	-0.492444
fat mass	-0.34127	0.62149	0.532967	-0.557387	0.535491	-0.0757021	-0.522589	0.611111	0.426129	0.302198	0.343101	-0.359585	-0.398046	-0.600733	0.223477	0.607846	-0.422531	0.595238	0.204275	-0.406718	0.19475	-0.315018	0.648352	0.192308	0.508092	-0.211233	0.59768	-0.583117	0.612332	0.476641	-0.438712	-0.218898	-0.275336	0.492063	-0.581591	0.436708	0.603175	0.612731	0.40055	0.481527	0.531522	0.588523	0.407814	-0.423882	0.518473	-0.214896	0.44726	0.485958	0.396581
Gastrocnemius muscle mass (g)	0.652625	-0.592796	-0.379121	0.826618	-0.365135	-0.195971	0.593407	-0.581807	-0.362637	-0.59768	-0.557387	0.650794	0.425519	0.647741	-0.368188	-0.784613	0.60174	-0.710012	-0.599084	0.499847	-0.369353	0.58486	-0.615995	-0.0940171	-0.491298	0.456044	-0.727106	0.700351	-0.612943	-0.41313	0.47321	0.585865	0.406593	-0.592186	0.554419	-0.341121	-0.6337	-0.593497	-0.180736	-0.505649	-0.441765	-0.514042	-0.283883	0.419911	-0.433893	0.249695	-0.610289	-0.489011	-0.546787
Sciatic response amplitude (mV)	0.41514	-0.487179	-0.364469	0.561661	-0.451534	-0.138584	0.471306	-0.532357	-0.257021	-0.443223	-0.506716	0.530525	0.236874	0.496337	-0.363609	-0.678064	0.411846	-0.594017	-0.374046	0.384122	-0.342491	0.192918	-0.522589	-0.144078	-0.426565	0.262515	-0.521368	0.414288	-0.525031	-0.385344	0.34987	0.376126	0.273504	-0.467643	0.411235	-0.287678	-0.480464	-0.448176	-0.245153	-0.351145	-0.361777	-0.528694	-0.331502	0.456864	-0.460763	0.0201465	-0.51931	-0.47619	-0.552893
B12 total (pmol/L)	0.502367	-0.29745	-0.343564	0.616888	-0.23931	-0.240037	0.408917	-0.358528	-0.360055	-0.486487	-0.317606	0.484654	0.560086	0.404031	-0.124618	-0.500305	0.397373	-0.439456	-0.357416	0.371773	-0.372576	0.496564	-0.428157	-0.18415	-0.431801	0.429073	-0.413804	0.374771	-0.181402	-0.279976	0.444716	0.475565	0.415636	-0.429379	0.410202	-0.420562	-0.590319	-0.305742	-0.318265	-0.463877	-0.478772	-0.378684	-0.252863	0.275741	-0.317703	0.025042	-0.44212	-0.425714	-0.238699
folate level (nmol/L)	0	0	0	0	0	0	-0.523199	0	0	0	0	0	0	0	0	0	0	0	0	0	0	0	0	0	0	0	0	0	0	0	0	0	0	0	0	0	0	0	0	0	0	0	0	0	0	0	0	0	0
	17	11	14	6	14	13	17	14	13	14	15	17	17	17	13	1	12	1	14	12	14	17	11	13	14	17	1	17	14	13	17	17	8	14	17	14	7	11	13	14	14	11	13	17	15	16	14	13	11
	body weight (g)	lean mass	fat mass	Gastrocnemius muscle mass (g)	Sciatic response amplitude (mV)	B12 total (pmol/L)	folate level (nmol/L)	Categories
EDA2R	0.649977	-0.676233	0.607846	-0.784613	-0.678064	-0.500305	0	1
ASAH2	0.526862	-0.65873	0.595238	-0.710012	-0.594017	-0.439456	0	1
PTH	0.592796	-0.664835	0.59768	-0.727106	-0.521368	-0.413804	0	1
NR1D1	0.537241	-0.724664	0.664225	-0.660562	-0.56105	-0.335013	0	1
GDF11	-0.608059	0.636142	-0.557387	0.826618	0.561661	0.616888	0	6
AMN	0.539072	-0.728938	0.603175	-0.6337	-0.480464	-0.590319	0	7
IGF1R	-0.147741	0.29243	-0.275336	0.406593	0.273504	0.415636	0	8
CSF3R	0.519536	-0.70696	0.62149	-0.592796	-0.487179	-0.29745	0	11
ABL1	0.525641	-0.757021	0.648352	-0.615995	-0.522589	-0.428157	0	11
SAA1	0.501298	-0.704015	0.612731	-0.593497	-0.448176	-0.305742	0	11
LTA	0.471306	-0.718559	0.588523	-0.514042	-0.528694	-0.378684	0	11
HPGD	0.446955	-0.492444	0.396581	-0.546787	-0.552893	-0.238699	0	11
IL20RA	0.591145	-0.698015	0.640305	-0.612214	-0.491298	-0.323812	0.501985	11
HAPLN1	-0.233552	0.497939	-0.422531	0.60174	0.411846	0.397373	0	12
CD48	-0.478779	0.513893	-0.406718	0.499847	0.384122	0.371773	0	12
COMMD7	0.137363	-0.02442	-0.0757021	-0.195971	-0.138584	-0.240037	0	13
KPNA2	0.321123	-0.500611	0.426129	-0.362637	-0.257021	-0.360055	0	13
IL18BP	0.336437	-0.255228	0.223477	-0.368188	-0.363609	-0.124618	0	13
ACY1	-0.0360195	-0.266178	0.192308	-0.0940171	-0.144078	-0.18415	0	13
FGFR3	0.392977	-0.523969	0.476641	-0.41313	-0.385344	-0.279976	0	13
CHST2	0.0610594	-0.484506	0.40055	-0.180736	-0.245153	-0.318265	0	13
TXNDC12	0.263736	-0.504884	0.407814	-0.283883	-0.331502	-0.252863	0	13
ATP5B	0.337607	-0.565324	0.485958	-0.489011	-0.47619	-0.425714	0	13
SIGLEC6	0.374237	-0.612943	0.532967	-0.379121	-0.364469	-0.343564	0	14
MMP3	0.404518	-0.628606	0.535491	-0.365135	-0.451534	-0.23931	0	14
C5	0.541514	-0.681319	0.611111	-0.581807	-0.532357	-0.358528	0	14
TNFSF11	0.376068	-0.388278	0.302198	-0.59768	-0.443223	-0.486487	0	14
RET	0.327328	-0.216183	0.204275	-0.599084	-0.374046	-0.357416	0	14
IGFBP7	0.199023	-0.275336	0.19475	-0.369353	-0.342491	-0.372576	0	14
IL17RD	0.33374	-0.572824	0.508092	-0.491298	-0.426565	-0.431801	0	14
DMP1	0.577534	-0.635531	0.612332	-0.612943	-0.525031	-0.181402	0	14
NME1	0.46337	-0.600733	0.492063	-0.592186	-0.467643	-0.429379	0	14
PSMA2	0.334708	-0.554894	0.436708	-0.341121	-0.287678	-0.420562	0	14
CBX5	0.277557	-0.545038	0.481527	-0.505649	-0.351145	-0.463877	0	14
CSN1S1	0.374599	-0.624943	0.531522	-0.441765	-0.361777	-0.478772	0	14
ERAP1	0.428026	-0.468631	0.44726	-0.610289	-0.51931	-0.44212	0	14
TNFSF15	0.319292	-0.373626	0.343101	-0.557387	-0.506716	-0.317606	0	15
VEGFA	0.150534	-0.461679	0.518473	-0.433893	-0.460763	-0.317703	0	15
HBA1 HBB	-0.205128	0.284493	-0.214896	0.249695	0.0201465	0.025042	0	16
TNFRSF25	-0.391331	0.474969	-0.401099	0.549451	0.47619	0.352115	0	16
MIA	-0.21978	0.413919	-0.34127	0.652625	0.41514	0.502367	0	17
WIF1	-0.365079	0.561661	-0.522589	0.593407	0.471306	0.408917	-0.523199	17
CNTN1	-0.304029	0.420635	-0.359585	0.650794	0.530525	0.484654	0	17
IL1B	-0.285714	0.526862	-0.398046	0.425519	0.236874	0.560086	0	17
WISP1	-0.595238	0.674603	-0.600733	0.647741	0.496337	0.404031	0	17
THBS4	-0.210623	0.347375	-0.315018	0.58486	0.192918	0.496564	0	17
DKK1	-0.106838	0.286325	-0.211233	0.456044	0.262515	0.429073	0	17
CA9	-0.545566	0.65303	-0.583117	0.700351	0.414288	0.374771	0	17
MATK	-0.31873	0.569379	-0.438712	0.47321	0.34987	0.444716	0	17
CFB	-0.327278	0.30835	-0.218898	0.585865	0.376126	0.475565	0	17
P4HB	-0.40635	0.605404	-0.581591	0.554419	0.411235	0.410202	0	17
EPHA2	-0.276378	0.459307	-0.423882	0.419911	0.456864	0.275741	0	17
EPHA10	-0.464662	0.454587	-0.373989	0.526637	0.301328	0.378742	0	17
NOTCH1	-0.211233	0.401709	-0.286325	0.400488	0.45177	0.561918	0	17
PDK1	-0.392917	0.580064	-0.557472	0.533964	0.489696	0.354459	0	17
ELANE	-0.299328	0.444716	-0.364692	0.47526	0.302382	0.38686	0	17
[truncated: 7 more columns]

## Sheet: Protein_OTU_Correlations
	Otu0005	Otu0018	Otu0022	Otu0055	Otu0098	Otu0126	Otu0128	Otu0134	Otu0143	Otu0177	Otu0178	Otu0207	Otu0212	Otu0214	Otu0222	Otu0229	Otu0232	Otu0245	Otu0269	Otu0274	Otu0299	Otu0319	Otu0349	Otu0354	Otu0371	Otu0408	Otu0420	Otu0423	Otu0426	Otu0435	Otu0482	Otu0486	Otu0496	Otu0499	Otu0502	Otu0513	Otu0538	Otu0550	Otu0557	Otu0558	Otu0560	Otu0570	Otu0575	Otu0595	Otu0599	Otu0616	Otu0630	Otu0638	Otu0648
MIA	0	-0.278388	0	0	0	-0.387422	0	0	0	0	0	-0.275946	0	0	0	0	0	0	0.308913	-0.442135	0.472639	-0.462759	0	0	-0.57563	0	-0.525031	0	0	-0.363158	0	0	0	0	0	0	0	0	-0.376709	0	0	0.216312	0	0	-0.28904	0	0	0.6397	-0.17829
CSF3R	0	0.374237	0	0	0	0.297359	0	0	0	0	0	0.338828	0	0	0	0	0	0	-0.305861	0.61825	-0.394681	0.672772	0	0	0.624008	0	0.576313	0	0	0.379934	0	0	0	0	0	0	0	0	0.595897	0	0	-0.311208	0	0	0.20637	0.485855	0	-0.743968	0.277979
SIGLEC6	0	0.333333	0	0	0	0.324225	-0.322955	0	0	0	0	0.479243	0	0	0	0	0	0	-0.362027	0.613323	-0.27698	0.301587	0	0	0.436622	0	0.332112	0	0	0.253618	0	0	0	0	0	0	0	0	0.269352	0	0	0.0153368	0	0	0.274955	0.414424	0	-0.3276	0.370638
GDF11	0	-0.435897	0	0	0	-0.510151	0	0	0	0	0	-0.332112	0	0	0	0	0	0	0.431013	-0.53635	0.433507	-0.489011	0	0	-0.583591	0	-0.65812	0	0	-0.4	0	0	0	0	0	0	0	0	-0.556916	0	0	0.275103	0	0	-0.385795	0	0	0.608701	-0.258808
MMP3	0	0.225309	0	0	0	0.352061	-0.334605	0	0	0	0	0.421615	0	0	0	0	0	0	-0.40116	0.603255	-0.451155	0.41093	0	0	0.479867	0	0.518394	0	0	0.189667	0	0	0	0	0	0	0	0	0.151474	0	0	-0.210114	0	0	0.0787019	0	0	-0.506624	0.295917
COMMD7	0	-0.29243	-0.636752	0	0	-0.156923	0	0	0	0	0	-0.258242	0	0	0	0	0	0	0	-0.0905206	0.0629778	0.332112	0	0	-0.151868	0	-0.0732601	0	0	0	-0.354307	0	0	0	0	0	0	0	0.286925	0	0	-0.312806	0	0	-0.177588	0	0	-0.336054	-0.324309
WIF1	0	-0.148962	0	0	0	-0.281789	0.331502	0	0	0	0	-0.263736	0	0	0	0	0	0	0.370574	-0.262941	0.562214	-0.5	0	0	-0.27618	0	-0.351648	0	0	-0.476974	0.370189	0	0	0	0	0	0	0	-0.294274	0	0	0.166787	0	0	-0.121862	0	0	0.529796	-0.0587909
C5	0	0.43956	0	0	0	0.324836	-0.374847	0	0	0	0	0.331502	0	0	0	0	0	0	-0.391331	0.536966	-0.377255	0.434066	0	0	0.46969	0	0.636142	0	0	0.410526	0	0	0	0	0	0	0	0	0.293316	0	0	-0.213756	0	-0.48727	0.20392	0.469229	0	-0.564317	0.234525
KPNA2	0	0.0811966	0	0	0	-0.0512899	0	0	0	0	0	0.0818071	0	0	0	0	0	0	0	0.197052	-0.220422	0.46337	0	0	0.0471527	0	0.120269	0	0	0.20625	0	0	0	0	0	0	0	0	0.440612	0	0	-0.252737	0	0	0.0685857	0	0	-0.534727	-0.0843522
TNFSF11	0	0.371795	0	0	0	0.33888	0	0	0	0	0	0.3779	0	0	0	0	0	0	-0.332112	0.490166	-0.248242	0.28083	0	0	0.480713	0	0.482906	0	0	0.298026	0	0	0	0	0	0	0	0	0.326545	0	0	-0.215034	0	0	0.327619	0	0	-0.37762	0.346994
TNFSF15	0	0.295482	0	0	0	0.528164	-0.489621	0	0	0	0	0.297924	0	0	0	0	0	0	-0.526252	0.410114	-0.684807	0.440781	0	0	0.553585	0	0.36569	0	0	0.518092	0	0	0	0	0	0	0	0	0.166468	0	0	-0.110233	0	0	0.271281	0.405187	0	-0.324077	0.315043
CNTN1	0	-0.343712	0	0	0	-0.33888	0.344933	0	0	0	0	-0.285104	0	0	0	0	0	0	0.29304	-0.329446	0.385204	-0.45116	0	0	-0.445807	0	-0.652015	0	0	-0.447697	0.351863	0	0	0	0	0	0	0	-0.417927	0	0	0.25721	0	0.507502	-0.218005	0	0	0.572771	0
IL1B	0	-0.135531	0	0	0	-0.280568	0	0	0	0	0	-0.389499	0	0	0	0	0	0	0.211844	-0.448293	0.391624	-0.450549	0	0	-0.33803	0	-0.189866	0	0	-0.234868	0	0	0	0	0	0	0	0	-0.552123	0	0	0.0488859	0	0	-0.129211	0	0	0.329009	-0.142824
WISP1	0	-0.380342	0	0	0	-0.394444	0.406593	0	0	0	0	-0.362637	0	0	0	0	0	0	0.405372	-0.578839	0.435647	-0.573871	0	0	-0.470915	0	-0.446276	0	0	-0.557566	0	0	0	0	0	0	0	0	-0.4224	0	0	0.173497	0	0	-0.338642	-0.514797	0	0.479775	-0.200975
IL18BP	0	0.0986109	0	0	0	-0.188092	0	0.569379	0	0	0	-0.0818196	0	0	0	0	0	0	0.180736	-0.0535816	-0.0532029	0.449702	0	0	0.0615529	0	0.188368	0	0	0	0	0	0	0	0	0	0	0	0.585123	0	0	-0.5431	0	0	0.0444038	0	0	-0.514375	-0.198769
EDA2R	0	0.513204	0	0	0	0.329771	0	0	0	0	0	0.214624	0	0	0	0	0	0	-0.291559	0.433888	-0.469806	0.500382	0	0	0.451388	0	0.617616	0	0	0.3971	0	0	0	0	0	0	0	0	0.622832	0	0	-0.354237	0	-0.492317	0.36013	0.422802	0	-0.668687	0
HAPLN1	0	-0.187758	0	0	0	-0.0665649	0	0	0	0	0	-0.128835	0	0	0	0	0	0	0	-0.281765	0.378994	-0.69455	0	0	-0.359211	0	-0.560525	0	0	-0.423255	0.465251	0	0	0	0	0	0	0	-0.580969	0	0	0.444834	0	0.480142	-0.0520596	0	0	0.768039	0.0629542
ASAH2	0	0.455433	0	0	0	0.502519	-0.432845	0	0	0	0	0.431013	0	0	0	0	0	0	-0.492674	0.675518	-0.485785	0.52381	0	0	0.642379	0	0.583028	0	0	0.529605	0	0	0	0	0	0	0	0	0.362651	0	0	-0.164231	0	0	0.414576	0.510487	0	-0.559385	0.428471
RET	0	0.419542	0	0	0	0.468927	0	0	0	0	0	0.29313	0	0	0	0	0	0	-0.340153	0.432414	-0.217737	0.0778626	0	0	0.523126	0	0.443969	0	0	0.270477	0	0	0	0	0	0	0	0	0.103395	0	0	-0.0532156	0	0	0.437674	0	0	-0.245246	0.464079
CD48	0	-0.205802	0	0	0	-0.182013	0.305038	0	0	0	0	-0.158779	0	0	0	0	0	0	0.137405	-0.406235	0.316208	-0.689466	0	0	-0.318837	0	-0.421374	0	0	-0.409007	0.344332	0	0	0	0	0	0	0	-0.58681	0	0	0.342785	0	0.497023	-0.0869835	0	0	0.552861	0.158848
IGFBP7	0	0.29304	0	0	0	0.123645	0	0	0	0	0	0.237485	0	0	0	0	0	0	-0.159951	0.35223	-0.127484	0.217338	0	0	0.406003	0	0.310745	0	0	0	0	0	0	0	0	0	0	0	0.372556	0	0	-0.300025	0	0	0.238825	0	0	-0.287442	0.290759
THBS4	0	-0.236264	0	0	0	-0.305602	0	0	0	0	0	-0.393162	0	0	0	0	0	0	0.232601	-0.341146	0.308163	-0.230769	0	0	-0.334968	0	-0.416361	0	0	-0.395395	0	0	0	0	0	0	0	0	-0.169663	0	0	-0.0520811	0	0	-0.311698	0	0	0.3121	-0.0817961
ABL1	0	0.35348	0	0	0	0.261945	0	0	0	0	0	0.452991	0	0	0	0	0	0	-0.368742	0.655813	-0.474473	0.630037	0	0	0.518067	0	0.479243	0	0	0.39375	0	0	0	0	0	0	0	0	0.577365	0	0	-0.226537	0	0	0.194122	0.503098	0	-0.736923	0.262323
ACY1	0	0.0750916	0	0	0	-0.281484	0	0	0	0	0	-0.0396825	0	0	0	0	0	0	0	0.0665049	-0.0229288	0.442613	0	0	0	0	0.171551	0	0	0	-0.395846	0	0	0	0	0	0	0	0.295552	0	0	-0.327504	0	0	-0.133497	0	0	-0.622087	-0.114387
IL17RD	0	0.403359	0	0	0	0.509085	-0.388702	0	0	0	0	0.483969	0	0	0	0	0	0	-0.485191	0.665252	-0.323701	0.305954	0	0	0.688823	0	0.455573	0	0	0.289233	0	0	0	0	0	0	0	0	0.344863	0	0	-0.109947	0	0	0.394182	0	0	-0.281892	0.615096
DKK1	0	-0.120879	0	0	0	-0.11357	0	0	0	0	0	-0.0683761	0	0	0	0	0	0	0.165446	-0.137936	0.346989	-0.452381	0	0	-0.251685	0	-0.403541	0	0	-0.267763	0.502138	0	0	0	0	0	0	0	-0.322711	0	0	0.4093	0	0.63472	0.062462	0	0	0.572771	0.0686959
PTH	0	0.368742	0	0	0	0.417341	-0.324786	0	0	0	0	0.396215	0	0	0	0	0	0	-0.433455	0.645344	-0.492205	0.580586	0	0	0.594614	0	0.527473	0	0	0.46875	0	0	0	0	0	0	0	0	0.42208	0	0	-0.16487	0	0	0.254135	0.492013	0	-0.665767	0.31664
CA9	0	-0.440238	0	0	0	-0.561832	0.375515	0	0	0	0	-0.514731	0	0	0	0	0	0	0.279652	-0.578928	0.520716	-0.533354	0	0	-0.601748	0	-0.588918	0	0	-0.550249	0	0	0	0	0	0	0	0	-0.459374	0	0	-0.0733401	0	0	-0.493035	-0.427421	0	0.421365	-0.0845249
DMP1	0	0.489011	0	0	0	0.390169	0	0	0	0	0	0.333944	0	0	0	0	0	0	-0.334554	0.574529	-0.386732	0.573871	0	0	0.695655	0	0.553724	0	0	0.374671	0	0	0	0	0	0	0	0	0.426873	0	0	-0.106399	0	0	0.467853	0.537582	0	-0.623496	0.261044
FGFR3	0	0.071145	0	0	0	-0.0177126	0	0	0	0	0	0.098626	0	0	0	0	0	0	-0.14687	0.233146	-0.0873089	0.33771	0	0	0.0483922	0	0.161527	0	0	0.211249	0	0	0	0	0	0	0	0	0.334156	0	0	-0.27247	0	0	-0.0321594	0	0	-0.596554	0
MATK	0	-0.208212	0	0	0	-0.154351	0	0	0	0	0	-0.353229	0	0	0	0	0	0	0.134941	-0.516108	0.389543	-0.55503	0	0	-0.380648	0	-0.415204	0	0	-0.318634	0	0	0	0	0	0	0	0	-0.717423	0	0	0.228009	0	0	-0.0768645	0	0	0.452016	-0.0787727
CFB	0	-0.150511	0	0	0	-0.38687	0	0	0	0	0	-0.239353	0	0	0	0	0	0	0.405129	-0.371992	0.44244	-0.539154	0	0	-0.371155	0	-0.436269	0	0	-0.533634	0	0	0	0	0	0	0	0	-0.228649	0	0	0.147	0	0	-0.188027	0	0	0.404454	-0.0645521
IGF1R	0	-0.266789	0	0	0	-0.633491	0.486569	0	0	-0.547092	0	-0.387668	0	0	0	-0.613158	0	0	0.521978	-0.479698	0.362886	-0.0714286	0	0	-0.483774	0	-0.386447	0	0	-0.365461	0	0	0	0	0	0	0	0	0.13835	0	0	-0.173817	0	0	-0.33558	0	0	0.045089	-0.421761
NME1	0	0.236874	0	0	0	0.38559	-0.387057	0	0	0	0	0.473748	0	0	0	0	0	0	-0.283272	0.479698	-0.509936	0.490842	0	0	0.436622	0	0.576313	0	0	0.373026	0	0	0	0	0	0	0	0	0.321113	0	0	-0.222703	0	-0.469782	0.102879	0	0	-0.510774	0.109913
P4HB	0	-0.360861	0	0	0	-0.433588	0	0	0	0	0	-0.330637	0	0	0	0	0	0	0.462525	-0.555216	0.347042	-0.213708	0	0	-0.440363	0	-0.332163	0	0	-0.378512	0	0	0	0	0	0	0	0	-0.316848	0	0	-0.0599184	0	0	-0.459043	0	0	0.235344	-0.283294
PSMA2	0	0.139869	0	0	0	0.338882	0	0	0	0	0	0.348145	0	0	0	0	0	0	-0.413804	0.504252	-0.295152	0.168575	0	0	0.292542	0	0.186288	0	0	0	0	0	0	0	0	0	0	0	0.204744	0	0	-0.156794	0	0	0.149794	0	0	-0.208632	0.320461
AMN	0	0.254579	0	0	0	0.488475	-0.487179	0	0	0	0	0.493895	0	0	0	0	0	0	-0.482906	0.557903	-0.494956	0.578144	0	0	0.437847	0	0.516484	0	0	0.498355	0	0	0	0	0	0	0	0	0.425276	0	0	-0.164551	0	0	0.221679	0	0	-0.479775	0.206088
SAA1	0	0.452755	0	0	0	0.350076	0	0	0	0	0	0.331858	0	0	0	0	0	0	-0.270798	0.643595	-0.388626	0.620669	0	0	0.65687	0	0.631049	0	0	0.384598	0	0	0	0	0	0	0	0	0.558759	0	0	-0.236638	0	0	0.27316	0.42311	0	-0.721534	0.276903
CHST2	0	0.055564	0	0	0	-0.198779	0	0	0	0	0	0.25706	0	0	0	0	0	0	0	0.230339	-0.113438	0.403908	0	0	0	0	0.222561	0	0	0	0	0	0	0	0	0	0	0	0.355675	0	0	-0.322121	0	0	-0.0793144	0	0	-0.509442	0.0691858
CBX5	0	0.365802	0	0	0	0.243243	0	0	0	0	0	0.327634	0	0	0	0	0	0	-0.334962	0.47738	-0.208104	0.187481	0	0	0.463401	0	0.432366	0	0	0	0	0	0	0	0	0	0	0	0.282378	0	0	-0.204872	0	0	0.246249	0	0	-0.475693	0.362282
CSN1S1	0	0.306823	0	0	0	0.130382	0	0.601435	0	0	0	0.382842	0	0	0	0	0	0	-0.181041	0.432348	-0.137594	0.345901	0	0	0.338388	0	0.4265	0	0	0	0	0	0	0	0	0	0	0	0.582407	0	0	-0.239514	0	0	0.162304	0	0	-0.477734	0.295118
LTA	0	0.363248	0	0	0	0.194779	0	0	0	0	0	0.32906	0	0	0	0	0	0	-0.265568	0.628102	-0.376032	0.617216	0	0	0.475201	0	0.545788	0	0	0.331908	0	0	0	0	0	0	0	0	0.577046	0	0	-0.296191	0	0	0.126761	0.381788	0	-0.729878	0.223022
TXNDC12	0	0.0879121	0	0	0	-0.182568	0	0	0	0	0	0.130647	0	0	0	0	0	0	0	0.131778	-0.117701	0.652625	0	0	0.0949178	0	0.383394	0	0	0	-0.47526	0	0	0	0	0	0	0	0.540301	0	0	-0.508669	0	-0.448179	-0.0636868	0	0	-0.69113	-0.146977
EPHA2	0	-0.312414	0	0	0	-0.373091	0.478852	0	0	0	0	-0.540235	0	0	0	0	0	0	0.329821	-0.520578	0.511699	-0.52466	0	0	-0.56119	0	-0.628188	0	0	-0.474395	0	0	0	0	0	0	0	0	-0.231116	0	0	0.159831	0	0	-0.223006	-0.356396	0	0.381317	-0.222645
VEGFA	0	0.532214	0	0	0	0.542678	-0.589924	0	0	0	0	0.255878	0	0	0	0	0	0	-0.519084	0.267333	-0.331193	-0.0207634	0	0	0.425116	0	0.406107	0	0	0.472842	0	0	0	0	0	0	0	0	-0.0934869	0.66161	0	0.108828	0	0	0.592958	0	0	0.014447	0.473188
HBA1 HBB	0	0.137363	0	0	0	0.294001	0	0	0	0	0	-0.141026	0	0	0	0	0	0	-0.281441	-0.0418735	0.0327117	-0.595849	0	0	-0.0434785	0	-0.166056	0	0	0	0.513745	0	0	0	0	0	0	0	-0.517616	0	0	0.451476	0	0	0.157992	0	0	0.651677	0.302582
ERAP1	0	0.45764	0	0	0	0.360305	0	0	0	0	0	0.269577	0	0	0	0	0	0	-0.35964	0.457907	-0.264333	0.206075	0	0	0.508653	0	0.376431	0	0	0.294124	0.307927	0	0	0	0	0	0	0	0.306622	0	0	-0.11712	0	0	0.39106	0.376611	0	-0.302283	0.456498
ATP5B	0	0.314408	0	0	0	0.270798	0	0	0	0	0	0.313797	0	0	0	0	0	0	-0.3663	0.502482	-0.241822	0.336386	0	0	0.363137	0	0.358974	0	0	0.366119	0	0	0	0	0	0	0	0	0.255932	0	0	-0.130043	0	0	0.345378	0	0	-0.460049	0.365207
HPGD	0	0.184705	0	0	0	0.100153	0	0	0	0	0	0.0796825	0	0	0	0	0	0	-0.185621	0.29901	-0.344443	0.592581	0	0	0.214669	0	0.351397	0	0	0.463887	-0.406904	0	0	0	0	0	0	0	0.468961	0	0	-0.262842	0	-0.44859	0.143623	0.361214	0	-0.61725	-0.140768
TNFRSF25	0	-0.117827	0	0	0	-0.11815	0	0	0	0	0	-0.26862	0	0	0	0	0	0	0	-0.368856	0.298074	-0.558608	0	0	-0.447032	0	-0.389499	0	0	0	0	0	0	0	0	0	0	0	-0.522728	0	0	0.31025	0	0	-0.114514	0	0	0.760877	0
EPHA10	0	-0.20058	0	0	0	-0.356641	0	0	0	0	0	-0.470463	0	0	0	0	0	0	0.27202	-0.507793	0.312032	-0.434132	0	0	-0.380035	0	-0.308655	0	0	-0.299223	0	0	0	0	0	0	0	0	-0.440999	0	0	0.109131	0	0	-0.279285	0	0	0.453073	-0.215227
IL20RA	0	0.43084	0	0	0	0.36769	-0.389313	0	0	0	0	0.390534	0	0	0	0	0	0	-0.427786	0.583636	-0.488991	0.651298	0	0	0.563555	0	0.545954	0	0	0.472348	0	0	0	0	0	0	0	0	0.467275	0	0	-0.170993	0	0	0.245024	0.551913	0	-0.662447	0.279182
NOTCH1	0	-0.180098	0	0	0	-0.386201	0.440781	0	0	0	0	-0.269231	0	0	0	0	0	0	0.453602	-0.419966	0.371141	-0.494505	0	0	-0.440296	0	-0.343712	0	0	-0.402961	0	0	0	0	0	0	0	0	-0.236122	0	0	0.173178	0	0	-0.216168	0	0	0.31985	-0.241874
PDK1	0	-0.436575	0	0	0	-0.376947	0.450008	0	0	0	0	-0.410319	0	0	0	0	0	0	0.404518	-0.557064	0.571014	-0.54007	0	0	-0.653808	0	-0.554724	0	0	-0.391672	0.336337	0	0	0	0	0	0	0	-0.434129	0	0	0.178157	0	0	-0.280203	-0.372916	0	0.433343	-0.169849
NR1D1	0	0.46337	0	0	0	0.393528	-0.405372	0	0	0	0	0.372405	0	0	0	0	0	0	-0.308303	0.612707	-0.496179	0.664835	0	0	0.653402	0	0.608059	0	0	0.532237	0	0	0	0	0	0	0	0	0.598453	0	0	-0.267754	0	0	0.319046	0.501866	0	-0.637586	0.219188
ELANE	0	-0.200367	0	0	0	-0.291431	0	0	0	0	0	-0.397679	0	0	0	0	0	0	0.372633	-0.50587	0.266137	-0.343311	0	0	-0.42157	0	-0.480758	0	0	-0.240278	0	0	0	0	0	0	0	0	-0.338894	0	0	0.241702	0	0	-0.164216	0	0	0.408869	-0.289019
Only the part selected for plotting:
Otu0177	0	0	0	0	0	0	0	0	0	0	0	0	0	0	0	0	0	0	0	0	0	0	0	0	0	0	0	0	0	0	0	0	-0.547092	0	0	0	0	0	0	0	0	0	0	0	0	0	0	0	0
Otu0229	0	0	0	0	0	0	0	0	0	0	0	0	0	0	0	0	0	0	0	0	0	0	0	0	0	0	0	0	0	0	0	0	-0.613158	0	0	0	0	0	0	0	0	0	0	0	0	0	0	0	0
Otu0570	0.216312	-0.311208	0.0153368	0.275103	-0.210114	-0.312806	0.166787	-0.213756	-0.252737	-0.215034	-0.110233	0.25721	0.0488859	0.173497	-0.5431	-0.354237	0.444834	-0.164231	-0.0532156	0.342785	-0.300025	-0.0520811	-0.226537	-0.327504	-0.109947	0.4093	-0.16487	-0.0733401	-0.106399	-0.27247	0.228009	0.147	-0.173817	-0.222703	-0.0599184	-0.156794	-0.164551	-0.236638	-0.322121	-0.204872	-0.239514	-0.296191	-0.508669	0.159831	0.108828	0.451476	-0.11712	-0.130043	-0.262842
Otu0809	0	0	0	0	0	0	0	0	0	0	0	0	0	0	0	0	0	0	0	0	0	0	0	0	0	0	0	0	0	0	0	0	0	0	0	0	0	0	0	0	0	0	0	0	0.510888	0	0	0	0
Otu1184	0	0	0	0	0	0	0	0	0	0	0	0	0	0	-0.54942	0	0	0	0	0	0	0	0	0	0	0	0	0	0	0	0	0	0	0	0	0	0	0	0	0	0	0	0	0	0	0	0	0	0
Otu0134	0	0	0	0	0	0	0	0	0	0	0	0	0	0	0.569379	0	0	0	0	0	0	0	0	0	0	0	0	0	0	0	0	0	0	0	0	0	0	0	0	0	0.601435	0	0	0	0	0	0	0	0
Otu0319	-0.462759	0.672772	0.301587	-0.489011	0.41093	0.332112	-0.5	0.434066	0.46337	0.28083	0.440781	-0.45116	-0.450549	-0.573871	0.449702	0.500382	-0.69455	0.52381	0.0778626	-0.689466	0.217338	-0.230769	0.630037	0.442613	0.305954	-0.452381	0.580586	-0.533354	0.573871	0.33771	-0.55503	-0.539154	-0.0714286	0.490842	-0.213708	0.168575	0.578144	0.620669	0.403908	0.187481	0.345901	0.617216	0.652625	-0.52466	-0.0207634	-0.595849	0.206075	0.336386	0.592581
Otu0557	-0.376709	0.595897	0.269352	-0.556916	0.151474	0.286925	-0.294274	0.293316	0.440612	0.326545	0.166468	-0.417927	-0.552123	-0.4224	0.585123	0.622832	-0.580969	0.362651	0.103395	-0.58681	0.372556	-0.169663	0.577365	0.295552	0.344863	-0.322711	0.42208	-0.459374	0.426873	0.334156	-0.717423	-0.228649	0.13835	0.321113	-0.316848	0.204744	0.425276	0.558759	0.355675	0.282378	0.582407	0.577046	0.540301	-0.231116	-0.0934869	-0.517616	0.306622	0.255932	0.468961
Otu0420	-0.525031	0.576313	0.332112	-0.65812	0.518394	-0.0732601	-0.351648	0.636142	0.120269	0.482906	0.36569	-0.652015	-0.189866	-0.446276	0.188368	0.617616	-0.560525	0.583028	0.443969	-0.421374	0.310745	-0.416361	0.479243	0.171551	0.455573	-0.403541	0.527473	-0.588918	0.553724	0.161527	-0.415204	-0.436269	-0.386447	0.576313	-0.332163	0.186288	0.516484	0.631049	0.222561	0.432366	0.4265	0.545788	0.383394	-0.628188	0.406107	-0.166056	0.376431	0.358974	0.351397
Otu0018	-0.278388	0.374237	0.333333	-0.435897	0.225309	-0.29243	-0.148962	0.43956	0.0811966	0.371795	0.295482	-0.343712	-0.135531	-0.380342	0.0986109	0.513204	-0.187758	0.455433	0.419542	-0.205802	0.29304	-0.236264	0.35348	0.0750916	0.403359	-0.120879	0.368742	-0.440238	0.489011	0.071145	-0.208212	-0.150511	-0.266789	0.236874	-0.360861	0.139869	0.254579	0.452755	0.055564	0.365802	0.306823	0.363248	0.0879121	-0.312414	0.532214	0.137363	0.45764	0.314408	0.184705
Otu0022	0	0	0	0	0	-0.636752	0	0	0	0	0	0	0	0	0	0	0	0	0	0	0	0	0	0	0	0	0	0	0	0	0	0	0	0	0	0	0	0	0	0	0	0	0	0	0	0	0	0	0
Otu0126	-0.387422	0.297359	0.324225	-0.510151	0.352061	-0.156923	-0.281789	0.324836	-0.0512899	0.33888	0.528164	-0.33888	-0.280568	-0.394444	-0.188092	0.329771	-0.0665649	0.502519	0.468927	-0.182013	0.123645	-0.305602	0.261945	-0.281484	0.509085	-0.11357	0.417341	-0.561832	0.390169	-0.0177126	-0.154351	-0.38687	-0.633491	0.38559	-0.433588	0.338882	0.488475	0.350076	-0.198779	0.243243	0.130382	0.194779	-0.182568	-0.373091	0.542678	0.294001	0.360305	0.270798	0.100153
Otu0207	-0.275946	0.338828	0.479243	-0.332112	0.421615	-0.258242	-0.263736	0.331502	0.0818071	0.3779	0.297924	-0.285104	-0.389499	-0.362637	-0.0818196	0.214624	-0.128835	0.431013	0.29313	-0.158779	0.237485	-0.393162	0.452991	-0.0396825	0.483969	-0.0683761	0.396215	-0.514731	0.333944	0.098626	-0.353229	-0.239353	-0.387668	0.473748	-0.330637	0.348145	0.493895	0.331858	0.25706	0.327634	0.382842	0.32906	0.130647	-0.540235	0.255878	-0.141026	0.269577	0.313797	0.0796825
Otu0274	-0.442135	0.61825	0.613323	-0.53635	0.603255	-0.0905206	-0.262941	0.536966	0.197052	0.490166	0.410114	-0.329446	-0.448293	-0.578839	-0.0535816	0.433888	-0.281765	0.675518	0.432414	-0.406235	0.35223	-0.341146	0.655813	0.0665049	0.665252	-0.137936	0.645344	-0.578928	0.574529	0.233146	-0.516108	-0.371992	-0.479698	0.479698	-0.555216	0.504252	0.557903	0.643595	0.230339	0.47738	0.432348	0.628102	0.131778	-0.520578	0.267333	-0.0418735	0.457907	0.502482	0.29901
Otu0371	-0.57563	0.624008	0.436622	-0.583591	0.479867	-0.151868	-0.27618	0.46969	0.0471527	0.480713	0.553585	-0.445807	-0.33803	-0.470915	0.0615529	0.451388	-0.359211	0.642379	0.523126	-0.318837	0.406003	-0.334968	0.518067	0	0.688823	-0.251685	0.594614	-0.601748	0.695655	0.0483922	-0.380648	-0.371155	-0.483774	0.436622	-0.440363	0.292542	0.437847	0.65687	0	0.463401	0.338388	0.475201	0.0949178	-0.56119	0.425116	-0.0434785	0.508653	0.363137	0.214669
Otu0435	-0.363158	0.379934	0.253618	-0.4	0.189667	0	-0.476974	0.410526	0.20625	0.298026	0.518092	-0.447697	-0.234868	-0.557566	0	0.3971	-0.423255	0.529605	0.270477	-0.409007	0	-0.395395	0.39375	0	0.289233	-0.267763	0.46875	-0.550249	0.374671	0.211249	-0.318634	-0.533634	-0.365461	0.373026	-0.378512	0	0.498355	0.384598	0	0	0	0.331908	0	-0.474395	0.472842	0	0.294124	0.366119	0.463887
Otu0482	0	0	0	0	0	-0.354307	0.370189	0	0	0	0	0.351863	0	0	0	0	0.465251	0	0	0.344332	0	0	0	-0.395846	0	0.502138	0	0	0	0	0	0	0	0	0	0	0	0	0	0	0	0	-0.47526	0	0	0.513745	0.307927	0	-0.406904
Otu0558	0	0	0	0	0	0	0	0	0	0	0	0	0	0	0	0	0	0	0	0	0	0	0	0	0	0	0	0	0	0	0	0	0	0	0	0	0	0	0	0	0	0	0	0	0.66161	0	0	0	0
Otu0599	-0.28904	0.20637	0.274955	-0.385795	0.0787019	-0.177588	-0.121862	0.20392	0.0685857	0.327619	0.271281	-0.218005	-0.129211	-0.338642	0.0444038	0.36013	-0.0520596	0.414576	0.437674	-0.0869835	0.238825	-0.311698	0.194122	-0.133497	0.394182	0.062462	0.254135	-0.493035	0.467853	-0.0321594	-0.0768645	-0.188027	-0.33558	0.102879	-0.459043	0.149794	0.221679	0.27316	-0.0793144	0.246249	0.162304	0.126761	-0.0636868	-0.223006	0.592958	0.157992	0.39106	0.345378	0.143623
Otu0616	0	0.485855	0.414424	0	0	0	0	0.469229	0	0	0.405187	0	0	-0.514797	0	0.422802	0	0.510487	0	0	0	0	0.503098	0	0	0	0.492013	-0.427421	0.537582	0	0	0	0	0	0	0	0	0.42311	0	0	0	0.381788	0	-0.356396	0	0	0.376611	0	0.361214
Otu0648	-0.17829	0.277979	0.370638	-0.258808	0.295917	-0.324309	-0.0587909	0.234525	-0.0843522	0.346994	0.315043	0	-0.142824	-0.200975	-0.198769	0	0.0629542	0.428471	0.464079	0.158848	0.290759	-0.0817961	0.262323	-0.114387	0.615096	0.0686959	0.31664	-0.0845249	0.261044	0	-0.0787727	-0.0645521	-0.421761	0.109913	-0.283294	0.320461	0.206088	0.276903	0.0691858	0.362282	0.295118	0.223022	-0.146977	-0.222645	0.473188	0.302582	0.456498	0.365207	-0.140768
Otu0705	0	0	0	0	0	0	0	0	0	0	0	0	0	0	0	0	0	0	0	0	0	0	0	0	0	0	0	-0.595487	0	0	0	0	0	0	0	0	0	0	0	0	0	0	0	0	0	0	0	0	0
Otu0733	0	0	0	0	0	0	0	0	0	0	0	0	0	0	0	0	0	0	0	0	0	0	0	0	0	0	0	0	0	0	0	0	0	0	0	0	0	0	0	0	0	0	0	0	0.560261	0	0	0	0
Otu0834	0	0	0	0	0	0	0	0	0	0	0	0	0	0	0	0	0	0	0	0	0	0	0	0	0	0	0	-0.543364	0	0	0	0	0	0	0	0	0	0	0	0	0	0	0	0	0.572595	0	0	0	0
Otu0954	-0.559231	0.506556	0.432493	-0.626165	0.458505	0.159611	-0.581806	0.569133	0.335459	0.449524	0.64874	-0.565964	-0.404769	-0.686761	0.125569	0.592986	-0.419685	0.73508	0.446095	-0.476007	0.216247	-0.489129	0.545369	0.133471	0.522557	-0.30932	0.627353	-0.732419	0.502991	0.453623	-0.435728	-0.548225	-0.519626	0.593292	-0.603682	0.41387	0.725575	0.55694	0.193701	0.332194	0.267973	0.49705	0.236445	-0.59396	0.562571	-0.162779	0.448206	0.638838	0.608237
Otu0962	-0.43749	0.386506	0.15387	-0.511678	0.47542	-0.187758	-0.483285	0.276599	0.10319	0.155396	0.667379	-0.344375	-0.35445	-0.32392	-0.0525191	0.40855	-0.265038	0.464967	0.267522	-0.361429	0.0317509	-0.239658	0.374294	0.0235079	0.423118	-0.361166	0.435659	-0.404733	0.380705	0.0711559	-0.265802	-0.385802	-0.499771	0.442681	-0.223206	0.20281	0.380095	0.413435	0.0522137	0.135288	0.0940458	0.332774	0.133415	-0.467776	0.264773	0.0116013	0.189771	0.182873	0.114656
Otu1094	-0.558252	0.411488	0	-0.572654	0	0	0	0	0	0	0.471839	-0.522247	0	0	0	0.499005	0	0.533563	0.564939	0	0	0	0.379597	0	0	0	0.501329	-0.425955	0.564424	0	0	0	-0.463267	0	0	0	0	0.429727	0	0	0	0	0	-0.392808	0.415558	0	0.376397	0	0
Otu1104	-0.368615	0.298726	0.131427	-0.294397	0.296298	-0.0995755	-0.485817	0.274915	0.159877	0.0887521	0.463243	-0.37047	-0.159259	-0.2811	-0.108096	0.346712	-0.288875	0.353153	0.169361	-0.263708	-0.0701976	-0.150909	0.35841	0.136684	0.181116	-0.37449	0.34604	-0.352434	0.245228	0.0765604	-0.180006	-0.290885	-0.261927	0.296562	-0.192996	0.229562	0.247393	0.307432	0.0966525	0.0287682	0.085982	0.34202	0.0825673	-0.117101	0.45364	0.0955554	0.109024	0.230075	0.339753
Otu1137	-0.444105	0.397679	0.224802	-0.51008	0.313732	0.0714722	-0.357972	0.556506	0.312156	0.295663	0.442883	-0.452657	-0.149664	-0.516188	0.131969	0.61616	-0.253857	0.486866	0.330584	-0.413688	0.208919	-0.291387	0.359805	0.233354	0.326306	-0.396457	0.410507	-0.517794	0.436164	0.31439	-0.169238	-0.267909	-0.237019	0.359805	-0.411792	0.372498	0.42639	0.533985	0	0.342499	0.146327	0.392181	0.183262	-0.224293	0.552704	-0.109346	0.31923	0.476481	0.46464
Otu1180	-0.512821	0.459096	0.275336	-0.485348	0.379484	-0.196581	-0.42735	0.468864	0.234432	0.316239	0.412088	-0.517705	-0.242979	-0.452991	0.0482369	0.543734	-0.392001	0.461538	0.280916	-0.42229	0.223443	-0.360806	0.443223	0.172772	0.429008	-0.409646	0.388278	-0.6225	0.522589	0.0442748	-0.264082	-0.264387	-0.295482	0.462759	-0.321478	0.319744	0.387057	0.544039	0.148374	0.312366	0.305602	0.440171	0.266789	-0.365552	0.637252	-0.0805861	0.291559	0.374237	0.312929
Otu0595	0	0	0	0	0	0	0	-0.48727	0	0	0	0.507502	0	0	0	-0.492317	0.480142	0	0	0.497023	0	0	0	0	0	0.63472	0	0	0	0	0	0	0	-0.469782	0	0	0	0	0	0	0	0	-0.448179	0	0	0	0	0	-0.44859
Otu0638	0.6397	-0.743968	-0.3276	0.608701	-0.506624	-0.336054	0.529796	-0.564317	-0.534727	-0.37762	-0.324077	0.572771	0.329009	0.479775	-0.514375	-0.668687	0.768039	-0.559385	-0.245246	0.552861	-0.287442	0.3121	-0.736923	-0.622087	-0.281892	0.572771	-0.665767	0.421365	-0.623496	-0.596554	0.452016	0.404454	0.045089	-0.510774	0.235344	-0.208632	-0.479775	-0.721534	-0.509442	-0.475693	-0.477734	-0.729878	-0.69113	0.381317	0.014447	0.651677	-0.302283	-0.460049	-0.61725
Otu0728	0.344737	-0.525658	-0.05625	0.358553	-0.311725	-0.316447	0.428619	-0.412171	-0.382566	-0.144737	-0.266447	0.376974	0.0917763	0.412829	-0.460103	-0.504024	0.592525	-0.299671	0.0541284	0.550333	-0.111184	0.0608553	-0.420724	-0.361513	-0.0922979	0.428947	-0.342105	0.28376	-0.407237	-0.379063	0.288366	0.264185	-0.169079	-0.355263	0.0909679	-0.131968	-0.350658	-0.488068	-0.234575	-0.159917	-0.218125	-0.438158	-0.545395	0.291252	-0.0302724	0.57204	-0.0557651	-0.230263	-0.539721
Otu1079	0	0	0	0	0	-0.621869	0	0	0	0	0	0	0	0	0	0	0	0	0	0	0	0	0	0	0	0	0	0	0	0	0	0	0	0	0	0	0	0	0	0	0	0	0	0	0	0	0	0	0
Otu1145	0.396382	-0.676974	-0.329276	0.528947	-0.334262	-0.338816	0.354605	-0.488158	-0.470066	-0.404276	-0.146382	0.479605	0.31579	0.519408	-0.570811	-0.582161	0.663095	-0.482566	-0.182457	0.654805	-0.418421	0.210197	-0.664145	-0.419408	-0.344842	0.45625	-0.536184	0.376209	-0.498684	-0.39239	0.632827	0.349396	-0.151316	-0.319737	0.324556	-0.334199	-0.426974	-0.582161	-0.489878	-0.336287	-0.567685	-0.666119	-0.643092	0.270354	-0.0189203	0.639803	-0.288037	-0.398684	-0.586438
Otu0128	0	0	-0.322955	0	-0.334605	0	0.331502	-0.374847	0	0	-0.489621	0.344933	0	0.406593	0	0	0	-0.432845	0	0.305038	0	0	0	0	-0.388702	0	-0.324786	0.375515	0	0	0	0	0.486569	-0.387057	0	0	-0.487179	0	0	0	0	0	0	0.478852	-0.589924	0	0	0	0
Otu0269	0.308913	-0.305861	-0.362027	0.431013	-0.40116	0	0.370574	-0.391331	0	-0.332112	-0.526252	0.29304	0.211844	0.405372	0.180736	-0.291559	0	-0.492674	-0.340153	0.137405	-0.159951	0.232601	-0.368742	0	-0.485191	0.165446	-0.433455	0.279652	-0.334554	-0.14687	0.134941	0.405129	0.521978	-0.283272	0.462525	-0.413804	-0.482906	-0.270798	0	-0.334962	-0.181041	-0.265568	0	0.329821	-0.519084	-0.281441	-0.35964	-0.3663	-0.185621
Otu0299	0.472639	-0.394681	-0.27698	0.433507	-0.451155	0.0629778	0.562214	-0.377255	-0.220422	-0.248242	-0.684807	0.385204	0.391624	0.435647	-0.0532029	-0.469806	0.378994	-0.485785	-0.217737	0.316208	-0.127484	0.308163	-0.474473	-0.0229288	-0.323701	0.346989	-0.492205	0.520716	-0.386732	-0.0873089	0.389543	0.44244	0.362886	-0.509936	0.347042	-0.295152	-0.494956	-0.388626	-0.113438	-0.208104	-0.137594	-0.376032	-0.117701	0.511699	-0.331193	0.0327117	-0.264333	-0.241822	-0.344443
Otu0875	0.4884	-0.424298	-0.381563	0.457875	-0.473821	0	0.416972	-0.407814	0	-0.416972	-0.720391	0.396825	0.318071	0.470696	0	-0.317509	0	-0.637363	-0.548702	0.295267	0	0	-0.420024	0	-0.55145	0.372405	-0.550061	0.476874	-0.363858	0	0	0.478095	0.610501	-0.46337	0.299802	-0.41869	-0.506716	-0.429247	0	-0.288855	0	-0.357143	0	0.44587	-0.578321	0	-0.419783	-0.362027	0
Otu0922	0.159951	-0.0720391	-0.191087	0.202686	-0.150206	0.252747	0.163004	-0.217949	0.0763126	-0.307692	-0.224054	0.199023	0.136142	0.181319	-0.15967	-0.167913	0.116318	-0.271673	-0.402137	0.148702	-0.279609	0.284493	-0.14652	0.0586081	-0.290992	0.123932	-0.217338	0.213097	-0.172772	-0.0662595	0.150817	0.0885361	0.271062	-0.235043	0.124866	-0.0998626	-0.104396	-0.100443	-0.0943367	-0.258321	-0.0891467	-0.0982906	0.0177045	0.279737	-0.338931	-0.0903541	-0.392917	-0.191087	0.0253396
	MIA	CSF3R	SIGLEC6	GDF11	MMP3	COMMD7	WIF1	C5	KPNA2	TNFSF11	TNFSF15	CNTN1	IL1B	WISP1	IL18BP	EDA2R	HAPLN1	ASAH2	RET	CD48	IGFBP7	THBS4	ABL1	ACY1	IL17RD	DKK1	PTH	CA9	DMP1	FGFR3	MATK	CFB	IGF1R	NME1	P4HB	PSMA2	AMN	SAA1	CHST2	CBX5	CSN1S1	LTA	TXNDC12	EPHA2	VEGFA	HBA1 HBB	ERAP1	ATP5B	HPGD
Categories	17	11	14	6	14	13	17	14	13	14	15	17	17	17	13	1	12	1	14	12	14	17	11	13	14	17	1	17	14	13	17	17	8	14	17	14	7	11	13	14	14	11	13	17	15	16	14	13	11
Otu0177	Otu0229	Otu0570	Otu0809	Otu1184	Otu0134	Otu0319	Otu0557	Otu0420	Otu0018	Otu0022	Otu0126	Otu0207	Otu0274	Otu0371	Otu0435	Otu0482	Otu0558	Otu0599	Otu0616	Otu0648	Otu0705	Otu0733	Otu0834	Otu0954	Otu0962	Otu1094	Otu1104	Otu1137	Otu1180	Otu0595	Otu0638	Otu0728	Otu1079	Otu1145	Otu0128	Otu0269	Otu0299	Otu0875	Otu0922		Categories
0	0	-0.354237	0	0	0	0.500382	0.622832	0.617616	0.513204	0	0.329771	0.214624	0.433888	0.451388	0.3971	0	0	0.36013	0.422802	0	0	0	0	0.592986	0.40855	0.499005	0.346712	0.61616	0.543734	-0.492317	-0.668687	-0.504024	0	-0.582161	0	-0.291559	-0.469806	-0.317509	-0.167913	EDA2R	1
0	0	-0.164231	0	0	0	0.52381	0.362651	0.583028	0.455433	0	0.502519	0.431013	0.675518	0.642379	0.529605	0	0	0.414576	0.510487	0.428471	0	0	0	0.73508	0.464967	0.533563	0.353153	0.486866	0.461538	0	-0.559385	-0.299671	0	-0.482566	-0.432845	-0.492674	-0.485785	-0.637363	-0.271673	ASAH2	1
0	0	-0.16487	0	0	0	0.580586	0.42208	0.527473	0.368742	0	0.417341	0.396215	0.645344	0.594614	0.46875	0	0	0.254135	0.492013	0.31664	0	0	0	0.627353	0.435659	0.501329	0.34604	0.410507	0.388278	0	-0.665767	-0.342105	0	-0.536184	-0.324786	-0.433455	-0.492205	-0.550061	-0.217338	PTH	1
0	0	-0.267754	0	0	0	0.664835	0.598453	0.608059	0.46337	0	0.393528	0.372405	0.612707	0.653402	0.532237	0	0	0.319046	0.501866	0.219188	0	0	0	0.703396	0.476568	0.442349	0.309241	0.556506	0.563492	0	-0.637586	-0.536184	0	-0.55329	-0.405372	-0.308303	-0.496179	-0.469475	-0.177045	NR1D1	1
0	0	0.275103	0	0	0	-0.489011	-0.556916	-0.65812	-0.435897	0	-0.510151	-0.332112	-0.53635	-0.583591	-0.4	0	0	-0.385795	0	-0.258808	0	0	0	-0.626165	-0.511678	-0.572654	-0.294397	-0.51008	-0.485348	0	0.608701	0.358553	0	0.528947	0	0.431013	0.433507	0.457875	0.202686	GDF11	6
0	0	-0.164551	0	0	0	0.578144	0.425276	0.516484	0.254579	0	0.488475	0.493895	0.557903	0.437847	0.498355	0	0	0.221679	0	0.206088	0	0	0	0.725575	0.380095	0	0.247393	0.42639	0.387057	0	-0.479775	-0.350658	0	-0.426974	-0.487179	-0.482906	-0.494956	-0.506716	-0.104396	AMN	7
-0.547092	-0.613158	-0.173817	0	0	0	-0.0714286	0.13835	-0.386447	-0.266789	0	-0.633491	-0.387668	-0.479698	-0.483774	-0.365461	0	0	-0.33558	0	-0.421761	0	0	0	-0.519626	-0.499771	-0.463267	-0.261927	-0.237019	-0.295482	0	0.045089	-0.169079	0	-0.151316	0.486569	0.521978	0.362886	0.610501	0.271062	IGF1R	8
0	0	-0.311208	0	0	0	0.672772	0.595897	0.576313	0.374237	0	0.297359	0.338828	0.61825	0.624008	0.379934	0	0	0.20637	0.485855	0.277979	0	0	0	0.506556	0.386506	0.411488	0.298726	0.397679	0.459096	0	-0.743968	-0.525658	0	-0.676974	0	-0.305861	-0.394681	-0.424298	-0.0720391	CSF3R	11
0	0	-0.226537	0	0	0	0.630037	0.577365	0.479243	0.35348	0	0.261945	0.452991	0.655813	0.518067	0.39375	0	0	0.194122	0.503098	0.262323	0	0	0	0.545369	0.374294	0.379597	0.35841	0.359805	0.443223	0	-0.736923	-0.420724	0	-0.664145	0	-0.368742	-0.474473	-0.420024	-0.14652	ABL1	11
0	0	-0.236638	0	0	0	0.620669	0.558759	0.631049	0.452755	0	0.350076	0.331858	0.643595	0.65687	0.384598	0	0	0.27316	0.42311	0.276903	0	0	0	0.55694	0.413435	0.429727	0.307432	0.533985	0.544039	0	-0.721534	-0.488068	0	-0.582161	0	-0.270798	-0.388626	-0.429247	-0.100443	SAA1	11
0	0	-0.296191	0	0	0	0.617216	0.577046	0.545788	0.363248	0	0.194779	0.32906	0.628102	0.475201	0.331908	0	0	0.126761	0.381788	0.223022	0	0	0	0.49705	0.332774	0	0.34202	0.392181	0.440171	0	-0.729878	-0.438158	0	-0.666119	0	-0.265568	-0.376032	-0.357143	-0.0982906	LTA	11
0	0	-0.262842	0	0	0	0.592581	0.468961	0.351397	0.184705	0	0.100153	0.0796825	0.29901	0.214669	0.463887	-0.406904	0	0.143623	0.361214	-0.140768	0	0	0	0.608237	0.114656	0	0.339753	0.46464	0.312929	-0.44859	-0.61725	-0.539721	0	-0.586438	0	-0.185621	-0.344443	0	0.0253396	HPGD	11
0	0	-0.170993	0	0	0	0.651298	0.467275	0.545954	0.43084	0	0.36769	0.390534	0.583636	0.563555	0.472348	0	0	0.245024	0.551913	0.279182	0	0	0	0.532858	0.508627	0.495994	0.368109	0.413993	0.442748	0	-0.662447	-0.418549	0	-0.557736	-0.389313	-0.427786	-0.488991	-0.48458	-0.141679	IL20RA	11
0	0	0.444834	0	0	0	-0.69455	-0.580969	-0.560525	-0.187758	0	-0.0665649	-0.128835	-0.281765	-0.359211	-0.423255	0.465251	0	-0.0520596	0	0.0629542	0	0	0	-0.419685	-0.265038	0	-0.288875	-0.253857	-0.392001	0.480142	0.768039	0.592525	0	0.663095	0	0	0.378994	0	0.116318	HAPLN1	12
0	0	0.342785	0	0	0	-0.689466	-0.58681	-0.421374	-0.205802	0	-0.182013	-0.158779	-0.406235	-0.318837	-0.409007	0.344332	0	-0.0869835	0	0.158848	0	0	0	-0.476007	-0.361429	0	-0.263708	-0.413688	-0.42229	0.497023	0.552861	0.550333	0	0.654805	0.305038	0.137405	0.316208	0.295267	0.148702	CD48	12
0	0	-0.312806	0	0	0	0.332112	0.286925	-0.0732601	-0.29243	-0.636752	-0.156923	-0.258242	-0.0905206	-0.151868	0	-0.354307	0	-0.177588	0	-0.324309	0	0	0	0.159611	-0.187758	0	-0.0995755	0.0714722	-0.196581	0	-0.336054	-0.316447	-0.621869	-0.338816	0	0	0.0629778	0	0.252747	COMMD7	13
0	0	-0.252737	0	0	0	0.46337	0.440612	0.120269	0.0811966	0	-0.0512899	0.0818071	0.197052	0.0471527	0.20625	0	0	0.0685857	0	-0.0843522	0	0	0	0.335459	0.10319	0	0.159877	0.312156	0.234432	0	-0.534727	-0.382566	0	-0.470066	0	0	-0.220422	0	0.0763126	KPNA2	13
0	0	-0.5431	0	-0.54942	0.569379	0.449702	0.585123	0.188368	0.0986109	0	-0.188092	-0.0818196	-0.0535816	0.0615529	0	0	0	0.0444038	0	-0.198769	0	0	0	0.125569	-0.0525191	0	-0.108096	0.131969	0.0482369	0	-0.514375	-0.460103	0	-0.570811	0	0.180736	-0.0532029	0	-0.15967	IL18BP	13
0	0	-0.327504	0	0	0	0.442613	0.295552	0.171551	0.0750916	0	-0.281484	-0.0396825	0.0665049	0	0	-0.395846	0	-0.133497	0	-0.114387	0	0	0	0.133471	0.0235079	0	0.136684	0.233354	0.172772	0	-0.622087	-0.361513	0	-0.419408	0	0	-0.0229288	0	0.0586081	ACY1	13
0	0	-0.27247	0	0	0	0.33771	0.334156	0.161527	0.071145	0	-0.0177126	0.098626	0.233146	0.0483922	0.211249	0	0	-0.0321594	0	0	0	0	0	0.453623	0.0711559	0	0.0765604	0.31439	0.0442748	0	-0.596554	-0.379063	0	-0.39239	0	-0.14687	-0.0873089	0	-0.0662595	FGFR3	13
0	0	-0.322121	0	0	0	0.403908	0.355675	0.222561	0.055564	0	-0.198779	0.25706	0.230339	0	0	0	0	-0.0793144	0	0.0691858	0	0	0	0.193701	0.0522137	0	0.0966525	0	0.148374	0	-0.509442	-0.234575	0	-0.489878	0	0	-0.113438	0	-0.0943367	CHST2	13
0	0	-0.508669	0	0	0	0.652625	0.540301	0.383394	0.0879121	0	-0.182568	0.130647	0.131778	0.0949178	0	-0.47526	0	-0.0636868	0	-0.146977	0	0	0	0.236445	0.133415	0	0.0825673	0.183262	0.266789	-0.448179	-0.69113	-0.545395	0	-0.643092	0	0	-0.117701	0	0.0177045	TXNDC12	13
0	0	-0.130043	0	0	0	0.336386	0.255932	0.358974	0.314408	0	0.270798	0.313797	0.502482	0.363137	0.366119	0	0	0.345378	0	0.365207	0	0	0	0.638838	0.182873	0	0.230075	0.476481	0.374237	0	-0.460049	-0.230263	0	-0.398684	0	-0.3663	-0.241822	-0.362027	-0.191087	ATP5B	13
0	0	0.0153368	0	0	0	0.301587	0.269352	0.332112	0.333333	0	0.324225	0.479243	0.613323	0.436622	0.253618	0	0	0.274955	0.414424	0.370638	0	0	0	0.432493	0.15387	0	0.131427	0.224802	0.275336	0	-0.3276	-0.05625	0	-0.329276	-0.322955	-0.362027	-0.27698	-0.381563	-0.191087	SIGLEC6	14
0	0	-0.210114	0	0	0	0.41093	0.151474	0.518394	0.225309	0	0.352061	0.421615	0.603255	0.479867	0.189667	0	0	0.0787019	0	0.295917	0	0	0	0.458505	0.47542	0	0.296298	0.313732	0.379484	0	-0.506624	-0.311725	0	-0.334262	-0.334605	-0.40116	-0.451155	-0.473821	-0.150206	MMP3	14
0	0	-0.213756	0	0	0	0.434066	0.293316	0.636142	0.43956	0	0.324836	0.331502	0.536966	0.46969	0.410526	0	0	0.20392	0.469229	0.234525	0	0	0	0.569133	0.276599	0	0.274915	0.556506	0.468864	-0.48727	-0.564317	-0.412171	0	-0.488158	-0.374847	-0.391331	-0.377255	-0.407814	-0.217949	C5	14
0	0	-0.215034	0	0	0	0.28083	0.326545	0.482906	0.371795	0	0.33888	0.3779	0.490166	0.480713	0.298026	0	0	0.327619	0	0.346994	0	0	0	0.449524	0.155396	0	0.0887521	0.295663	0.316239	0	-0.37762	-0.144737	0	-0.404276	0	-0.332112	-0.248242	-0.416972	-0.307692	TNFSF11	14
0	0	-0.0532156	0	0	0	0.0778626	0.103395	0.443969	0.419542	0	0.468927	0.29313	0.432414	0.523126	0.270477	0	0	0.437674	0	0.464079	0	0	0	0.446095	0.267522	0.564939	0.169361	0.330584	0.280916	0	-0.245246	0.0541284	0	-0.182457	0	-0.340153	-0.217737	-0.548702	-0.402137	RET	14
0	0	-0.300025	0	0	0	0.217338	0.372556	0.310745	0.29304	0	0.123645	0.237485	0.35223	0.406003	0	0	0	0.238825	0	0.290759	0	0	0	0.216247	0.0317509	0	-0.0701976	0.208919	0.223443	0	-0.287442	-0.111184	0	-0.418421	0	-0.159951	-0.127484	0	-0.279609	IGFBP7	14
0	0	-0.109947	0	0	0	0.305954	0.344863	0.455573	0.403359	0	0.509085	0.483969	0.665252	0.688823	0.289233	0	0	0.394182	0	0.615096	0	0	0	0.522557	0.423118	0	0.181116	0.326306	0.429008	0	-0.281892	-0.0922979	0	-0.344842	-0.388702	-0.485191	-0.323701	-0.55145	-0.290992	IL17RD	14
0	0	-0.106399	0	0	0	0.573871	0.426873	0.553724	0.489011	0	0.390169	0.333944	0.574529	0.695655	0.374671	0	0	0.467853	0.537582	0.261044	0	0	0	0.502991	0.380705	0.564424	0.245228	0.436164	0.522589	0	-0.623496	-0.407237	0	-0.498684	0	-0.334554	-0.386732	-0.363858	-0.172772	DMP1	14
0	0	-0.222703	0	0	0	0.490842	0.321113	0.576313	0.236874	0	0.38559	0.473748	0.479698	0.436622	0.373026	0	0	0.102879	0	0.109913	0	0	0	0.593292	0.442681	0	0.296562	0.359805	0.462759	-0.469782	-0.510774	-0.355263	0	-0.319737	-0.387057	-0.283272	-0.509936	-0.46337	-0.235043	NME1	14
0	0	-0.156794	0	0	0	0.168575	0.204744	0.186288	0.139869	0	0.338882	0.348145	0.504252	0.292542	0	0	0	0.149794	0	0.320461	0	0	0	0.41387	0.20281	0	0.229562	0.372498	0.319744	0	-0.208632	-0.131968	0	-0.334199	0	-0.413804	-0.295152	-0.41869	-0.0998626	PSMA2	14
0	0	-0.204872	0	0	0	0.187481	0.282378	0.432366	0.365802	0	0.243243	0.327634	0.47738	0.463401	0	0	0	0.246249	0	0.362282	0	0	0	0.332194	0.135288	0	0.0287682	0.342499	0.312366	0	-0.475693	-0.159917	0	-0.336287	0	-0.334962	-0.208104	-0.288855	-0.258321	CBX5	14
0	0	-0.239514	0	0	0.601435	0.345901	0.582407	0.4265	0.306823	0	0.130382	0.382842	0.432348	0.338388	0	0	0	0.162304	0	0.295118	0	0	0	0.267973	0.0940458	0	0.085982	0.146327	0.305602	0	-0.477734	-0.218125	0	-0.567685	0	-0.181041	-0.137594	0	-0.0891467	CSN1S1	14
0	0	-0.11712	0	0	0	0.206075	0.306622	0.376431	0.45764	0	0.360305	0.269577	0.457907	0.508653	0.294124	0.307927	0	0.39106	0.376611	0.456498	0	0	0	0.448206	0.189771	0.376397	0.109024	0.31923	0.291559	0	-0.302283	-0.0557651	0	-0.288037	0	-0.35964	-0.264333	-0.419783	-0.392917	ERAP1	14
0	0	-0.110233	0	0	0	0.440781	0.166468	0.36569	0.295482	0	0.528164	0.297924	0.410114	0.553585	0.518092	0	0	0.271281	0.405187	0.315043	0	0	0	0.64874	0.667379	0.471839	0.463243	0.442883	0.412088	0	-0.324077	-0.266447	0	-0.146382	-0.489621	-0.526252	-0.684807	-0.720391	-0.224054	TNFSF15	15
0	0	0.108828	0.510888	0	0	-0.0207634	-0.0934869	0.406107	0.532214	0	0.542678	0.255878	0.267333	0.425116	0.472842	0	0.66161	0.592958	0	0.473188	0	0.560261	0.572595	0.562571	0.264773	0.415558	0.45364	0.552704	0.637252	0	0.014447	-0.0302724	0	-0.0189203	-0.589924	-0.519084	-0.331193	-0.578321	-0.338931	VEGFA	15
0	0	0.451476	0	0	0	-0.595849	-0.517616	-0.166056	0.137363	0	0.294001	-0.141026	-0.0418735	-0.0434785	0	0.513745	0	0.157992	0	0.302582	0	0	0	-0.162779	0.0116013	0	0.0955554	-0.109346	-0.0805861	0	0.651677	0.57204	0	0.639803	0	-0.281441	0.0327117	0	-0.0903541	HBA1 HBB	16
0	0	0.31025	0	0	0	-0.558608	-0.522728	-0.389499	-0.117827	0	-0.11815	-0.26862	-0.368856	-0.447032	0	0	0	-0.114514	0	0	0	0	0	-0.431305	-0.126088	-0.371025	0.0677237	-0.205864	-0.178266	0	0.760877	0.467434	0	0.471711	0	0	0.298074	0	0.107448	TNFRSF25	16
0	0	0.216312	0	0	0	-0.462759	-0.376709	-0.525031	-0.278388	0	-0.387422	-0.275946	-0.442135	-0.57563	-0.363158	0	0	-0.28904	0	-0.17829	0	0	0	-0.559231	-0.43749	-0.558252	-0.368615	-0.444105	-0.512821	0	0.6397	0.344737	0	0.396382	0	0.308913	0.472639	0.4884	0.159951	MIA	17
0	0	0.166787	0	0	0	-0.5	-0.294274	-0.351648	-0.148962	0	-0.281789	-0.263736	-0.262941	-0.27618	-0.476974	0.370189	0	-0.121862	0	-0.0587909	0	0	0	-0.581806	-0.483285	0	-0.485817	-0.357972	-0.42735	0	0.529796	0.428619	0	0.354605	0.331502	0.370574	0.562214	0.416972	0.163004	WIF1	17
0	0	0.25721	0	0	0	-0.45116	-0.417927	-0.652015	-0.343712	0	-0.33888	-0.285104	-0.329446	-0.445807	-0.447697	0.351863	0	-0.218005	0	0	0	0	0	-0.565964	-0.344375	-0.522247	-0.37047	-0.452657	-0.517705	0.507502	0.572771	0.376974	0	0.479605	0.344933	0.29304	0.385204	0.396825	0.199023	CNTN1	17
0	0	0.0488859	0	0	0	-0.450549	-0.552123	-0.189866	-0.135531	0	-0.280568	-0.389499	-0.448293	-0.33803	-0.234868	0	0	-0.129211	0	-0.142824	0	0	0	-0.404769	-0.35445	0	-0.159259	-0.149664	-0.242979	0	0.329009	0.0917763	0	0.31579	0	0.211844	0.391624	0.318071	0.136142	IL1B	17
0	0	0.173497	0	0	0	-0.573871	-0.4224	-0.446276	-0.380342	0	-0.394444	-0.362637	-0.578839	-0.470915	-0.557566	0	0	-0.338642	-0.514797	-0.200975	0	0	0	-0.686761	-0.32392	0	-0.2811	-0.516188	-0.452991	0	0.479775	0.412829	0	0.519408	0.406593	0.405372	0.435647	0.470696	0.181319	WISP1	17
0	0	-0.0520811	0	0	0	-0.230769	-0.169663	-0.416361	-0.236264	0	-0.305602	-0.393162	-0.341146	-0.334968	-0.395395	0	0	-0.311698	0	-0.0817961	0	0	0	-0.489129	-0.239658	0	-0.150909	-0.291387	-0.360806	0	0.3121	0.0608553	0	0.210197	0	0.232601	0.308163	0	0.284493	THBS4	17
0	0	0.4093	0	0	0	-0.452381	-0.322711	-0.403541	-0.120879	0	-0.11357	-0.0683761	-0.137936	-0.251685	-0.267763	0.502138	0	0.062462	0	0.0686959	0	0	0	-0.30932	-0.361166	0	-0.37449	-0.396457	-0.409646	0.63472	0.572771	0.428947	0	0.45625	0	0.165446	0.346989	0.372405	0.123932	DKK1	17
0	0	-0.0733401	0	0	0	-0.533354	-0.459374	-0.588918	-0.440238	0	-0.561832	-0.514731	-0.578928	-0.601748	-0.550249	0	0	-0.493035	-0.427421	-0.0845249	-0.595487	0	-0.543364	-0.732419	-0.404733	-0.425955	-0.352434	-0.517794	-0.6225	0	0.421365	0.28376	0	0.376209	0.375515	0.279652	0.520716	0.476874	0.213097	CA9	17
0	0	0.228009	0	0	0	-0.55503	-0.717423	-0.415204	-0.208212	0	-0.154351	-0.353229	-0.516108	-0.380648	-0.318634	0	0	-0.0768645	0	-0.0787727	0	0	0	-0.435728	-0.265802	0	-0.180006	-0.169238	-0.264082	0	0.452016	0.288366	0	0.632827	0	0.134941	0.389543	0	0.150817	MATK	17
0	0	0.147	0	0	0	-0.539154	-0.228649	-0.436269	-0.150511	0	-0.38687	-0.239353	-0.371992	-0.371155	-0.533634	0	0	-0.188027	0	-0.0645521	0	0	0	-0.548225	-0.385802	0	-0.290885	-0.267909	-0.264387	0	0.404454	0.264185	0	0.349396	0	0.405129	0.44244	0.478095	0.0885361	CFB	17
0	0	-0.0599184	0	0	0	-0.213708	-0.316848	-0.332163	-0.360861	0	-0.433588	-0.330637	-0.555216	-0.440363	-0.378512	0	0	-0.459043	0	-0.283294	0	0	0	-0.603682	-0.223206	0	-0.192996	-0.411792	-0.321478	0	0.235344	0.0909679	0	0.324556	0	0.462525	0.347042	0.299802	0.124866	P4HB	17
0	0	0.159831	0	0	0	-0.52466	-0.231116	-0.628188	-0.312414	0	-0.373091	-0.540235	-0.520578	-0.56119	-0.474395	0	0	-0.223006	-0.356396	-0.222645	0	0	0	-0.59396	-0.467776	-0.392808	-0.117101	-0.224293	-0.365552	0	0.381317	0.291252	0	0.270354	0.478852	0.329821	0.511699	0.44587	0.279737	EPHA2	17
0	0	0.109131	0	0	0	-0.434132	-0.440999	-0.308655	-0.20058	0	-0.356641	-0.470463	-0.507793	-0.380035	-0.299223	0	0	-0.279285	0	-0.215227	0	0	0	-0.553573	-0.407023	0	-0.239389	-0.294792	-0.249428	0	0.453073	0.153806	0	0.472441	0	0.27202	0.312032	0.395359	0.0659441	EPHA10	17
0	0	0.173178	0	0	0	-0.494505	-0.236122	-0.343712	-0.180098	0	-0.386201	-0.269231	-0.419966	-0.440296	-0.402961	0	0	-0.216168	0	-0.241874	0	0	0	-0.55329	-0.379179	0	-0.20781	-0.354307	-0.385226	0	0.31985	0.272368	0	0.301316	0.440781	0.453602	0.371141	0.532967	0.266789	NOTCH1	17
0	0	0.178157	0	0	0	-0.54007	-0.434129	-0.554724	-0.436575	0	-0.376947	-0.410319	-0.557064	-0.653808	-0.391672	0.336337	0	-0.280203	-0.372916	-0.169849	0	0	0	-0.501682	-0.642748	-0.379141	-0.271864	-0.413625	-0.507403	0	0.433343	0.301197	0	0.472276	0.450008	0.404518	0.571014	0.444818	0.357808	PDK1	17
0	0	0.241702	0	0	0	-0.343311	-0.338894	-0.480758	-0.200367	0	-0.291431	-0.397679	-0.50587	-0.42157	-0.240278	0	0	-0.164216	0	-0.289019	0	0	0	-0.389561	-0.387353	0	-0.177613	-0.187042	-0.238852	0	0.408869	0.182677	0	0.508205	0	0.372633	0.266137	0.353696	0.136836	ELANE	17
Bacteria(100)-Firmicutes(100)-Negativicutes(100)-Selenomonadales(100)-Veillonellaceae(100)-Anaerosinus(100)-	Bacteria(100)-Firmicutes(100)-Clostridia(100)-Clostridiales(100)-Lachnospiraceae(100)-Lachnospiracea_incertae_sedis(100)-	Bacteria(100)-Firmicutes(100)-Clostridia(100)-Clostridiales(100)-Ruminococcaceae(100)-Clostridium_IV(100)-	Bacteria(100)-Firmicutes(100)-Clostridia(100)-Clostridiales(100)-Lachnospiraceae(100)-Lachnobacterium(100)-	Bacteria(100)-Firmicutes(100)-Clostridia(100)-Clostridiales(100)-Ruminococcaceae(100)-Acetivibrio(100)-	Bacteria(100)-Firmicutes(100)-Clostridia(100)-Clostridiales(100)-Lachnospiraceae(100)-Syntrophococcus(91)-	Bacteria(100)-Firmicutes(100)-Clostridia(100)-Clostridiales(100)-Ruminococcaceae(100)-Ruminococcus(100)-	Bacteria(100)-Firmicutes(100)-Clostridia(100)-Clostridiales(100)-Ruminococcaceae(100)-Clostridium_IV(100)-	Bacteria(100)-Firmicutes(100)-Clostridia(100)-Clostridiales(100)-Lachnospiraceae(100)-Clostridium_XlVb(100)-	Bacteria(100)-Firmicutes(100)-Clostridia(100)-Clostridiales(100)-Ruminococcaceae(100)-Pseudoflavonifractor(62)-	Bacteria(100)-Firmicutes(100)-Clostridia(100)-Clostridiales(100)-Lachnospiraceae(100)-Clostridium_XlVa(81)-	Bacteria(100)-Firmicutes(100)-Clostridia(100)-Clostridiales(100)-Lachnospiraceae(100)-Clostridium_XlVa(100)-	Bacteria(100)-Firmicutes(100)-Clostridia(100)-Clostridiales(100)-Ruminococcaceae(100)-Hydrogenoanaerobacterium(100)-	Bacteria(100)-Firmicutes(100)-Clostridia(100)-Clostridiales(100)-Lachnospiraceae(100)-Johnsonella(100)-	Bacteria(100)-Proteobacteria(100)-Alphaproteobacteria(100)-Rhizobiales(100)-Hyphomicrobiaceae(100)-Gemmiger(100)-	Bacteria(100)-Firmicutes(100)-Clostridia(100)-Clostridiales(100)-Lachnospiraceae(100)-Clostridium_XlVa(100)-	Bacteria(100)-Firmicutes(100)-Clostridia(100)-Clostridiales(100)-Lachnospiraceae(100)-Lachnobacterium(53)-	Bacteria(100)-Firmicutes(100)-Clostridia(100)-Clostridiales(100)-Lachnospiraceae(100)-Clostridium_XlVa(100)-	Bacteria(100)-Firmicutes(100)-Clostridia(100)-Clostridiales(100)-Lachnospiraceae(100)-Clostridium_XlVa(100)-	Bacteria(100)-Firmicutes(100)-Clostridia(100)-Clostridiales(100)-Lachnospiraceae(100)-Lactonifactor(100)-	Bacteria(100)-Firmicutes(100)-Clostridia(100)-Clostridiales(100)-Lachnospiraceae(100)-Clostridium_XlVa(100)-	Bacteria(100)-Proteobacteria(100)-Alphaproteobacteria(100)-Rhodospirillales(100)-Rhodospirillaceae(100)-Dongia(100)-	Bacteria(100)-Firmicutes(100)-Clostridia(100)-Clostridiales(100)-Lachnospiraceae(100)-Parasporobacterium(100)-	Bacteria(100)-Firmicutes(100)-Clostridia(100)-Clostridiales(100)-Lachnospiraceae(100)-Coprococcus(100)-	Bacteria(100)-Proteobacteria(100)-Betaproteobacteria(100)-Burkholderiales(100)-Sutterellaceae(100)-Sutterella(100)-	Bacteria(100)-Firmicutes(100)-Clostridia(100)-Clostridiales(100)-Ruminococcaceae(100)-Clostridium_IV(100)-	Bacteria(100)-Firmicutes(100)-Clostridia(100)-Clostridiales(100)-Lachnospiraceae(100)-Syntrophococcus(100)-	Bacteria(100)-Proteobacteria(100)-Alphaproteobacteria(100)-Rhodospirillales(100)-Rhodospirillaceae(100)-Insolitispirillum(100)-	Bacteria(100)-Firmicutes(100)-Clostridia(100)-Clostridiales(100)-Ruminococcaceae(100)-Papillibacter(100)-	Bacteria(100)-Proteobacteria(100)-Deltaproteobacteria(100)-Bdellovibrionales(100)-Bdellovibrionaceae(100)-Vampirovibrio(100)-	Bacteria(100)-Firmicutes(100)-Clostridia(100)-Clostridiales(100)-Lachnospiraceae(100)-Acetitomaculum(100)-	Bacteria(100)-Proteobacteria(100)-Alphaproteobacteria(100)-Rickettsiales(100)-Rickettsiaceae(100)-Orientia(100)-	Bacteria(100)-Firmicutes(100)-Clostridia(100)-Clostridiales(100)-Lachnospiraceae(100)-Lachnospiracea_incertae_sedis(100)-	Bacteria(100)-Firmicutes(100)-Clostridia(100)-Clostridiales(100)-Lachnospiraceae(100)-Dorea(100)-	Bacteria(100)-Firmicutes(100)-Clostridia(100)-Clostridiales(100)-Ruminococcaceae(100)-Clostridium_III(100)-	Bacteria(100)-Bacteroidetes(100)-Bacteroidia(100)-Bacteroidales(100)-Porphyromonadaceae(100)-Barnesiella(100)-	Bacteria(100)-Firmicutes(100)-Clostridia(100)-Clostridiales(100)-Ruminococcaceae(100)-Papillibacter(100)-	Bacteria(100)-Firmicutes(100)-Clostridia(100)-Clostridiales(100)-Lachnospiraceae(100)-Clostridium_XlVa(100)-	Bacteria(100)-Bacteroidetes(100)-Bacteroidia(100)-Bacteroidales(100)-Porphyromonadaceae(100)-Barnesiella(100)-	Bacteria(100)-Firmicutes(100)-Clostridia(100)-Clostridiales(100)-Ruminococcaceae(100)-Sporobacter(100)-
Cat 10	Cat 10	Cat 10	Cat 10	Cat 10	Cat 13	Cat 13	Cat 13	Cat 14	Cat 15	Cat 15	Cat 15	Cat 15	Cat 15	Cat 15	Cat 15	Cat 15	Cat 15	Cat 15	Cat 15	Cat 15	Cat 15	Cat 15	Cat 15	Cat 15	Cat 15	Cat 15	Cat 15	Cat 15	Cat 15	Cat 16	Cat 16	Cat 16	Cat 16	Cat 16	Cat 18	Cat 18	Cat 18	Cat 18	Cat 18	Categories
Otu0177	Otu0229	Otu0570	Otu0809	Otu1184	Otu0134	Otu0319	Otu0557	Otu0420	Otu0018	Otu0022	Otu0126	Otu0207	Otu0274	Otu0371	Otu0435	Otu0482	Otu0558	Otu0599	Otu0616	Otu0648	Otu0705	Otu0733	Otu0834	Otu0954	Otu0962	Otu1094	Otu1104	Otu1137	Otu1180	Otu0595	Otu0638	Otu0728	Otu1079	Otu1145	Otu0128	Otu0269	Otu0299	Otu0875	Otu0922
[truncated: 45 more columns]

## Sheet: Protein_MFCs_Correlations
	K05597	K13017	K01828	K14067	K12428	K05927	K05922	K01347	K04335	K04338	K13075	K08692	K08693	K08690	K11740	K09929	K00752	K01668	K02319	K11176	K00320	K06945	K01044	K00810	K03231	K03932	K11159	K05345	K00466	K00469	K02352	K13573	K07326	K10843	K08354	K06986	K02442	K08299	K02182	K10984	K07465	K07466	K07463	K10673	K08721	K00446	K03396	K12136	K12139
MIA	0	0	0	0	0	0	0.110338	0	0	0	0	0	0	0	0	-0.353837	0	0	0	0	0	0	0	0	0	0	0	0.312759	0	0	0	0	0	0	0	0	0	0	-0.0850054	0	0	0	0	0	0	0	0	0	0
CSF3R	0	0	0	0	0	0.447543	0.405324	0	0	0	0	0	0.507318	0	0	0.226063	0	0	0	0	0	0	0	0	0	0	0	-0.429315	0	0	0	0	0	0	0	0	0	0	0.219784	0	0	0	0	0	0	0	0	0	0
SIGLEC6	0	0	0	0	0	0.440018	0.440452	0	0	0	0	0	0.51261	0	0	0.100556	0	0	0	0	0	0	0	0	0	0	0	-0.379455	0	0	0	0	0	0	0	0	0	0	0.137015	0	0	0	0	0	0	0	0	0	0
GDF11	0	0	0	0	0	0	-0.118445	0	0	0	0	0	-0.34552	0	0	-0.45893	0	0	0	0	0	0	-0.428383	0	0	0	0	0.421544	0	0	0	0	0	0	0	0	0	-0.431738	-0.23768	0	0	0	0	0	0	0	0	0	0
MMP3	0	0	0	0	0	0	0.223638	0	0	0	0	0	0.301715	0	0	0.258613	0	0	0	0	0	0	0	0	0	0	0	-0.0900209	0	0	0	0	0	0	0	0	0	0	0.294208	0	0	0	0	0	0	0	0	0	0
COMMD7	0	0	0	0	0	0	-0.051341	0	0	0	0	0	0	0	0	0.403737	0	0	0	0	0	0.5489	0	0	0	0	0	-0.104253	0	0	0	0	0	0	0	0	0	0	0.196855	0	0	0	0	0	0	0	0	0	0
WIF1	0	0	0	0	0	0	0.117544	0	0	0	0	0	0	0	0	-0.34174	0	0	0	0	0	0	-0.44516	0	0	0	0	0.198793	0	0	0	0	0	0	0	0	0	-0.450753	-0.391472	0	0	0	0	0	0	0	0	0	0
C5	0	0	0	0	0	0	0.276521	0	0	0	0	0	0.424151	0	0	0.457418	0	0	0	0	0	0	0.462497	0	0	0	0	-0.302398	0	0	0	0	0	0	0	0	0	0.464734	0.493815	0	0	0	0	0	0	0	0	0	0
KPNA2	0	0	0	0	0	0	0.233286	0	0	0	0	0	0.331911	0	0	0.283523	0	0	0	0	0	0	0	0	0	0	0	-0.125622	0	0	0	0	0	0	0	0	0	0	0.0833277	0	0	0	0	0	0	0	0	0	0
TNFSF11	0	0	0	0	0	0.407146	0.32561	0	0	0	0	0	0.415834	0	0	0.348545	0	0	0	0	0	0	0	0	0	0	0	-0.490831	0	0	0	0	0	0	0	0	0	0	0.158826	0	0	0	0	0	0	0	0	0	0
TNFSF15	0	0	0	0	0	0	-0.0553943	0	0	0	0	0	0	0	0	0.227575	0	0	0	0	0	0	0.479833	0	0	0	0	-0.121089	0	0	0	0	0	0	0	0	0	0.48207	0.355121	0	0	0	0	0	0	0	0	0	0
CNTN1	0	0	0	0	0	0	0.0860188	0	0	0	0	0	0	0	0	-0.336448	0	0	0	0	0	-0.486335	-0.379728	0	0	0	0	0.33089	0	0	0	0	0	0	0	0	0	-0.386439	-0.300875	0	0	0	0	0	0	0	0	0	0
IL1B	0	0	0	0	0	-0.399621	-0.315702	0	0	0	0	0	-0.332667	0	0	0.0476319	0	0	0	0	0	0	0	0	0	0	0	0.343193	0	0	0	0	0	0	0	0	0	0	-0.165537	0	0	0	0	0	0	0	0	0	0
WISP1	0	0	0	0	0	-0.526755	-0.407125	0	0	0	0	0	-0.574607	0	0	-0.426419	0	0	0	0	0	0	-0.412165	0	0	0	0	0.315349	0	0	0	0	0	0	0	0	0	-0.403217	-0.402657	0	0	0	0	0	0	0	0	0	0
IL18BP	0	0	0	0	0	0.549017	0.500426	0	0	0	0	0	0.546716	0	0	-0.226853	0	0	0	0	0	0	0	0	0	0	0	-0.473096	0	0	0	0	0	0	0	0	0	0	-0.173393	0	0	0	0	0	0	0	0	0	0
EDA2R	0	0	0	0	0	0	0.322732	0	0	0	0	0	0.512688	0	0	0.251051	0	0	0	0	0	0	0.346226	0	0	0	0	-0.29532	0	0	0	0	0	0	0	0	0	0.343989	0.195766	0	0	0	0	0	0	0	0	0	0
HAPLN1	0	0	0	0	0	0	-0.129723	0	0	0	0	0	0	0	0	-0.184129	0	0	0	0	0	0	0	0	0	0	0	0.405418	0	0	0	0	0	0	0	0	0	0	-0.148503	0	0	0	0	0	0	0	0	0	0
ASAH2	0	0	0	0	0	0	0.268865	0	0	0	0	0	0.473295	0	0	0.457418	0	0	0	0	0	0	0.405454	0	0	0	0	-0.424135	0	0	0	0	0	0	0	0	0	0.406572	0.350647	0	0	0	0	0	0	0	0	0	0
RET	0	0	0	0	0	0	0.0520325	0	0	0	0	0	0	0	0	0.372096	0	0	0	0	0	0	0	0	0	0	0	-0.48839	0	0	0	0	0	0	0	0	0	0	0.154399	0	0	0	0	0	0	0	0	0	0
CD48	0	0	0	0	0	-0.532264	-0.42144	0	0	0	0	0	-0.443566	0	0	-0.218569	0	0	0	0	0	0	-0.382082	0	0	0	0	0.296337	0	0	0	0	0	0	0	0	0	-0.370894	-0.430751	0	0	0	0	0	0	0	0	0	0
IGFBP7	0	0	0	0	0	0.482792	0.408927	0	0	0	0	0	0.471783	0	0	0.0839229	0	0	0	0	0	0	0	0	0	0	0	-0.455216	0	0	0	0	0	0	0	0	0	0	0.0123034	0	0	0	0	0	0	0	0	0	0
THBS4	0	0	0	0	0	0	0.119345	0	0	0	0	0	0	0	0	-0.601825	0	0	0	0	0	0	-0.421672	0	0	0	0	0.159941	0	0	0	0	0	0	0	0	0	-0.428383	-0.374136	0	0	0	0	0	0	0	0	0	0
ABL1	0	0	0	0	0	0.43487	0.40037	0	0	0	0	0	0.531512	0	0	0.201869	0	0	0	0	0	0	0	0	0	0	0	-0.451979	0	0	0	0	0	0	0	0	0	0	0.180077	0	0	0	0	0	0	0	0	0	0
ACY1	0	0	0	0	0	0	0.314802	0	0	0	0	0	0	0	0	0.105849	0	0	0	0	0	0	0	0	0	0	0	-0.210448	0	0	0	0	0	0	0	0	0	0	0.0553654	0	0	0	0	0	0	0	0	0	0
IL17RD	0	0	0	0	0	0	0.230655	0	0	0	0	0	0.438272	0	0	0.291173	0	0	0	0	0	0	0	0	0	0	0	-0.443048	0	0	0	0	0	0	0	0	0	0	0.183209	0	0	0	0	0	0	0	0	0	0
DKK1	0	0	0	0	0	0	0.0504403	0	0	0	0	0	0	0	0	-0.204137	0	0	0	0	0	0	0	0	0	0	0	0.340603	0	0	0	0	0	0	0	0	0	0	-0.367425	0	0	0	0	0	0	0	0	0	0
PTH	0	0	0	0	0	0	0.189151	0	0	0	0	0	0.353081	0	0	0.393908	0	0	0	0	0	0	0.369662	0	0	0	0	-0.446151	0	0	0	0	0	0	0	0	0	0.373017	0.346173	0	0	0	0	0	0	0	0	0	0
CA9	0	0	0	0	0	0	-0.20472	0	0	0	0	0	-0.369393	0	0	-0.322132	0	0	0	0	0	0	-0.479907	0	0	0	0	0.0871066	0	0	0	0	0	0	0	0	0	-0.482144	-0.383142	0	0	0	0	0	0	0	0	0	0
DMP1	0	0	0	0	0	0	0.281925	0	0	0	0	0	0.408273	0	0	0.29562	0	0	0	0	0	0	0	0	0	0	0	-0.167064	0	0	0	0	0	0	0	0	0	0	0.115205	0	0	0	0	0	0	0	0	0	0
FGFR3	0	0	0	0	0	0	0.28111	0	0	0	0	0	0.434112	0	0	0.349407	0	0	0	0	0	0	0.347957	0	0	0	0	-0.526282	0	0	0	0	0	0	0	0	0	0.363621	0.22097	0	0	0	0	0	0	0	0	0	0
MATK	0	0	0	0	0	-0.554563	-0.376108	0	0	0	0	0	-0.631408	0	0	0	0	0	0	0	0	0	-0.337836	0	0	0	0	0.421933	0	0	0	0	0	0	0	0	0	-0.327768	-0.258411	0	0	0	0	0	0	0	0	0	0
CFB	0	0	0	0	0	0	0	0	0	0	0	0	0	0	0	-0.544448	0	0	0	0	0	-0.457487	-0.497246	0	0	0	0	0.123698	0	0	0	0	0	0	0	0	0	-0.492771	-0.481864	0	0	0	0	0	0	0	0	0	0
IGF1R	0	0	0	0	0	0	0.207166	0	0	0	0	0	0	0	0	-0.392396	0	0	0	0	0	0	-0.373017	0	0	0	0	0.113318	0	0	0	0	0	0	0	0	0	-0.379728	-0.300875	0	0	0	0	0	0	0	0	0	0
NME1	0	0	0	0	0	0	0.204463	0	0	0	0	0	0	0	0	0.338716	0	0	0	0	0	0	0.462497	0	0	0	0	-0.135982	0	0	0	0	0	0	0	0	0	0.464734	0.451871	0	0	0	0	0	0	0	0	0	0
P4HB	0	0	0	0	0	0	0	0	0	0	0	0	-0.480929	0	0	-0.390944	0	0	0	0	0	0	-0.355176	0	0	0	0	0.234767	0	0	0	0	0	0	0	0	0	-0.35182	-0.126968	0	0	0	0	0	0	0	0	0	0
PSMA2	0	0	0	0	0	0	0.219426	0	0	0	0	0	0.399005	0	0	0.241672	0	0	0	0	0	0	0	0	0	0	0	-0.295411	0	0	0	0	0	0	0	0	0	0	0.23639	0	0	0	0	0	0	0	0	0	0
AMN	0	0	0	0	0	0.431305	0.298138	0	0	0	0	0	0.476319	0	0	0.399201	0	0	0	0	0	0	0.511151	0	0	0	0	-0.329595	0	0	0	0	0	0	0	0	0	0.510033	0.43062	0	0	0	0	0	0	0	0	0	0
SAA1	0	0	0	0	0	0.397305	0.379261	0	0	0	0	0	0.477148	0	0	0.289616	0	0	0	0	0	0	0	0	0	0	0	-0.324788	0	0	0	0	0	0	0	0	0	0	0.233801	0	0	0	0	0	0	0	0	0	0
CHST2	0	0	0	0	0	0.388986	0.425655	0	0	0	0	0	0.366746	0	0	0.0778863	0	0	0	0	0	0	0	0	0	0	0	-0.335474	0	0	0	0	0	0	0	0	0	0	0.0967644	0	0	0	0	0	0	0	0	0	0
CBX5	0	0	0	0	0	0	0.29913	0	0	0	0	0	0	0	0	0.213275	0	0	0	0	0	0	0	0	0	0	0	-0.532111	0	0	0	0	0	0	0	0	0	0	0.0299288	0	0	0	0	0	0	0	0	0	0
CSN1S1	0	0	0	0	0	0.449394	0.431736	0	0	0	0	0	0.500968	0	0	0.141405	0	0	0	0	0	0	0	0	0	0	0	-0.514868	0	0	0	0	0	0	0	0	0	0	0.0869761	0	0	0	0	0	0	0	0	0	0
LTA	0	0	0	0	0	0.431305	0.41343	0	0	0	0	0	0.588216	0	0	0.21699	0	0	0	0	0	0	0	0	0	0	0	-0.34384	0	0	0	0	0	0	0	0	0	0	0.212514	0	0	0	0	0	0	0	0	0	0
TXNDC12	0	0	0	0	0	0.468534	0.516563	0	0	0	0	0	0.433224	0	0	0.19204	0	0	0	0	0	0	0	0	0	0	0	-0.173539	0	0	0	0	0	0	0	0	0	0	0.247746	0	0	0	0	0	0	0	0	0	0
EPHA2	0	0	0	0	0	0	-0.256147	0	0	0	0	0	-0.369127	0	0	-0.236756	0	0	0	0	0	0	0	0	0	0	0	0.101062	0	0	0	0	0	0	0	0	0	0	-0.250098	0	0	0	0	0	0	0	0	0	0
VEGFA	0	0	0	0	0	0	-0.137852	0	0	0	0	0	0	0	0	0.292307	0	0	0	0	0	0	0	0	0	0	0	-0.20695	0	0	0	0	0	0	0	0	0	0	0.290337	0	0	0	0	0	0	0	0	0	0
HBA1 HBB	0	0	0	0	0	-0.47804	-0.481885	0	0	0	0	0	-0.362154	0	0	-0.268402	0	0	0	0	0	0	0	0	0	0	0	0.226637	0	0	0	0	0	0	0	0	0	0	-0.299197	0	0	0	0	0	0	0	0	0	0
ERAP1	0	0	0	0	0	0	0.222287	0	0	0	0	0	0.374686	0	0	0.22156	0	0	0	0	0	0	0	0	0	0	0	-0.53624	0	0	0	0	0	0	0	0	0	0	0.13424	0	0	0	0	0	0	0	0	0	0
ATP5B	0	0	0	0	0	0	0.191853	0	0	0	0	0	0.495221	0	0	0.58746	0	0	0	0	0	0	0.331074	0	0	0	0	-0.330242	0	0	0	0	0	0	0	0	0	0.334429	0.203006	0	0	0	0	0	0	0	0	0	0
HPGD	0	0	0	0	0	0	0.121391	0	0	0	0	0	0.550119	0.547472	0.547472	0.436314	0	0	0	0	0	0.60974	0.479907	0	0	0	0	-0.105564	0	0	0	0	0	0	0	0	0	0.478788	0.330565	0	0	0	0	0	0	0	0	0	0
TNFRSF25	0	0	0	0	0	0	-0.317504	0	0	0	0	0	-0.340984	0	0	-0.145164	0	0	0	0	0	0	0	0	0	0	0	0.429315	0	0	0	0	0	0	0	0	0	0	0.0251661	0	0	0	0	0	0	0	0	0	0
EPHA10	0	0	0	0	0	0	-0.281293	0	0	0	0	0	-0.459	0	0	-0.367124	0	0	0	0	0	0	-0.366083	0	0	0	0	0.357493	0	0	0	0	0	0	0	0	0	-0.367761	-0.24247	0	0	0	0	0	0	0	0	0	0
IL20RA	0	0	0	0	0	0.40212	0.345982	0	0	0	0	0	0.409154	0	0	0.232182	0	0	0	0	0	0	0	0	0	0	0	-0.344917	0	0	0	0	0	0	0	0	0	0	0.310477	0	0	0	0	0	0	0	0	0	0
NOTCH1	0	0	0	0	0	0	-0.200861	0	0	0	0	0	0	0	0	-0.336448	0	0	0	0	0	0	-0.436771	0	0	0	0	0.322472	0	0	0	0	0	0	0	0	0	-0.434534	-0.384202	0	0	0	0	0	0	0	0	0	0
PDK1	0	0	0	0	0	0	-0.169812	0	0	0	0	0	-0.322888	0	0	-0.120988	0	0	0	0	0	0	-0.37643	0	0	0	0	0.192994	0	0	0	0	0	0	0	0	0	-0.369718	-0.398244	0	0	0	0	0	0	0	0	0	0
NR1D1	0	0	0	0	0	0.462197	0.390012	0	0	0	0	0	0.575363	0	0	0.263866	0	0	0	0	0	0	0.38588	0	0	0	0	-0.326357	0	0	0	0	0	0	0	0	0	0.391472	0.28913	0	0	0	0	0	0	0	0	0	0
ELANE	0	0	0	0	0	0	-0.144203	0	0	0	0	0	-0.350271	0	0	-0.435758	0	0	0	0	0	0	-0.384437	0	0	0	0	0.360249	0	0	0	0	0	0	0	0	0	-0.385556	-0.334634	0	0	0	0	0	0	0	0	0	0
Description	Categories		MIA	CSF3R	SIGLEC6	GDF11	MMP3	COMMD7	WIF1	C5	KPNA2	TNFSF11	TNFSF15	CNTN1	IL1B	WISP1	IL18BP	EDA2R	HAPLN1	ASAH2	RET	CD48	IGFBP7	THBS4	ABL1	ACY1	IL17RD	DKK1	PTH	CA9	DMP1	FGFR3	MATK	CFB	IGF1R	NME1	P4HB	PSMA2	AMN	SAA1	CHST2	CBX5	CSN1S1	LTA	TXNDC12	EPHA2	VEGFA	HBA1 HBB	ERAP1
'quinone-reactive Ni/Fe-hydrogenase small subunit [EC:1.12.5.1]'	1	K05927	0	0.447543	0.440018	0	0	0	0	0	0	0.407146	0	0	-0.399621	-0.526755	0.549017	0	0	0	0	-0.532264	0.482792	0	0.43487	0	0	0	0	0	0	0	-0.554563	0	0	0	0	0	0.431305	0.397305	0.388986	0	0.449394	0.431305	0.468534	0	0	-0.47804	0
'quinone-reactive Ni/Fe-hydrogenase large subunit [EC:1.12.5.1]'	1	K05922	0.110338	0.405324	0.440452	-0.118445	0.223638	-0.051341	0.117544	0.276521	0.233286	0.32561	-0.0553943	0.0860188	-0.315702	-0.407125	0.500426	0.322732	-0.129723	0.268865	0.0520325	-0.42144	0.408927	0.119345	0.40037	0.314802	0.230655	0.0504403	0.189151	-0.20472	0.281925	0.28111	-0.376108	0	0.207166	0.204463	0	0.219426	0.298138	0.379261	0.425655	0.29913	0.431736	0.41343	0.516563	-0.256147	-0.137852	-0.481885	0.222287
'3''-nucleotidase [EC:3.1.3.6]'	1	K08693	0	0.507318	0.51261	-0.34552	0.301715	0	0	0.424151	0.331911	0.415834	0	0	-0.332667	-0.574607	0.546716	0.512688	0	0.473295	0	-0.443566	0.471783	0	0.531512	0	0.438272	0	0.353081	-0.369393	0.408273	0.434112	-0.631408	0	0	0	-0.480929	0.399005	0.476319	0.477148	0.366746	0	0.500968	0.588216	0.433224	-0.369127	0	-0.362154	0.374686
'cis-2,3-dihydrobiphenyl-2,3-diol dehydrogenase [EC:1.3.1.56]'	1	K08690	0	0	0	0	0	0	0	0	0	0	0	0	0	0	0	0	0	0	0	0	0	0	0	0	0	0	0	0	0	0	0	0	0	0	0	0	0	0	0	0	0	0	0	0	0	0	0
'bacteriophage N4 adsorption protein B'	1	K11740	0	0	0	0	0	0	0	0	0	0	0	0	0	0	0	0	0	0	0	0	0	0	0	0	0	0	0	0	0	0	0	0	0	0	0	0	0	0	0	0	0	0	0	0	0	0	0
'hypothetical protein'	1	K09929	-0.353837	0.226063	0.100556	-0.45893	0.258613	0.403737	-0.34174	0.457418	0.283523	0.348545	0.227575	-0.336448	0.0476319	-0.426419	-0.226853	0.251051	-0.184129	0.457418	0.372096	-0.218569	0.0839229	-0.601825	0.201869	0.105849	0.291173	-0.204137	0.393908	-0.322132	0.29562	0.349407	0	-0.544448	-0.392396	0.338716	-0.390944	0.241672	0.399201	0.289616	0.0778863	0.213275	0.141405	0.21699	0.19204	-0.236756	0.292307	-0.268402	0.22156
'None'	1	K06945	0	0	0	0	0	0.5489	0	0	0	0	0	-0.486335	0	0	0	0	0	0	0	0	0	0	0	0	0	0	0	0	0	0	0	-0.457487	0	0	0	0	0	0	0	0	0	0	0	0	0	0	0
'crotonobetaine/carnitine-CoA ligase [EC:6.2.1.-]'	1	K02182	-0.0850054	0.219784	0.137015	-0.23768	0.294208	0.196855	-0.391472	0.493815	0.0833277	0.158826	0.355121	-0.300875	-0.165537	-0.402657	-0.173393	0.195766	-0.148503	0.350647	0.154399	-0.430751	0.0123034	-0.374136	0.180077	0.0553654	0.183209	-0.367425	0.346173	-0.383142	0.115205	0.22097	-0.258411	-0.481864	-0.300875	0.451871	-0.126968	0.23639	0.43062	0.233801	0.0967644	0.0299288	0.0869761	0.212514	0.247746	-0.250098	0.290337	-0.299197	0.13424
'5-dehydro-4-deoxyglucarate dehydratase [EC:4.2.1.41]'	1	K01707	-0.136407	0.0953028	-0.202609	-0.219706	0.164804	0.34229	-0.255717	0.387759	-0.110217	0.0571089	0.188787	-0.303368	0.312826	-0.134224	-0.0607557	0.16626	-0.0965906	0.185513	0.196667	-0.193393	-0.0974853	-0.230618	-0.0709315	-0.147683	-0.0383875	-0.181512	0.158232	-0.241749	0.159687	0.169196	0.0289226	-0.299595	-0.0611102	0.220797	-0.0607557	-0.022199	0.120402	0.162622	-0.302505	-0.110068	-0.174627	0.0254626	0.0265538	-0.0746031	0.170651	-0.240439	-0.0363807
'sorbitol/mannitol transport system permease protein'	1	K10228	0	0	0	0	0	0.53435	0	0	0	0	0	-0.492883	0	0	0	0	0	0	0	0	0	0	0	0	0	0	0	0	0	0	0	-0.461125	0	0	0	0	0	0	0	0	0	0	0	0	0	0	0
'sorbitol/mannitol transport system permease protein'	1	K10229	0	0	0	0	0	0.53435	0	0	0	0	0	0	0	0	0	0	0	0	0	0	0	0	0	0	0	0	0	0	0	0	0	0	0	0	0	0	0	0	0	0	0	0	0	0	0	0	0
'sorbitol/mannitol transport system substrate-binding protein'	1	K10227	0	0	0	0	0	0.535078	0	0	0	0	0	-0.500885	0	0	0	0	0	0	0	0	0	0	0	0	0	0	0	0	0	0	0	0	0	0	0	0	0	0	0	0	0	0	0	0	0	0	0
'cobalamin biosynthesis protein CobW'	1	K02234	0	0	0	0	0	0	0	0	0	0	0	0	0	0	0	0	0	0	0	0	0	0	0	0	0	0	0	0	0	0	0	0	0	0	0	0	0	0	0	0	0	0	0	0	0	0	0
'type VI secretion system protein ImpE'	1	K11898	0	0	0	0	0	0	0	0	0	0	0	0	0	0	0	0	0	0	0	0	0	0	0	0	0	0	0	0	0	0	0	0	0	0	0	0	0	0	0	0	0	0	0	0	0	0	0
'type VI secretion system protein ImpF'	1	K11897	0	0	0	0	0	0	0	0	0	0	0	0	0	0	0	0	0	0	0	0	0	0	0	0	0	0	0	0	0	0	0	0	0	0	0	0	0	0	0	0	0	0	0	0	0	0	0
'alpha-1,3-rhamnosyltransferase [EC:2.4.1.-]'	1	K12994	0	0	0	0	0	0	0	0	0	0	0	0	0	0	0	0	0	0	0	0	0	0	0	0	0	0	0	0	0	0	0	0	0	0	0	0	0	0	0	0	0	0	0	0	0	0	0
'trans-o-hydroxybenzylidenepyruvate hydratase-aldolase [EC:4.1.2.45]'	1	K14585	0	0	0	0	0	0	0	0	0	0	0	0	0	0	0	0	0	0	0	0	0	0	0	0	0	0	0	0	0	0	0	0	0	0	0	0	0	0	0	0	0	0	0	0	0	0	0
'hypothetical protein'	1	K09925	0	0	0	0	0	0	0	0	0	0	0	0	0	0	0	0	0	0	0	0	0	0	0	0	0	0	0	0	0	0	0	0	0	0	0	0	0	0	0	0	0	0	0	0	0	0	0
'isoquinoline 1-oxidoreductase [EC:1.3.99.16]'	1	K00256	0	0	0	0	0	0	0	0	0	0	0	0	0	0	0	0	0	0	0	0	0	0	0	0	0	0	0	0	0	0	0	0	0	0	0	0	0	0	0	0	0	0	0	0	0	0	0
'4-(2-carboxyphenyl)-2-oxobut-3-enoate aldolase [EC:4.1.2.34]'	1	K11949	0	0	0	0	0	0	0	0	0	0	0	0	0	0	0	0	0	0	0	0	0	0	0	0	0	0	0	0	0	0	0	0	0	0	0	0	0	0	0	0	0	0	0	0	0	0	0
'6-phospho-5-dehydro-2-deoxy-D-gluconate aldolase [EC:4.1.2.29]'	1	K03339	-0.224172	0.35749	0.45427	-0.274537	0.376311	0.213309	-0.305151	0.320951	0.439457	0.222197	0.257749	-0.178745	-0.532286	-0.498709	0.294333	0.473599	-0.163463	0.411805	0.0691491	-0.562083	0.196521	-0.0533273	0.422668	0.284412	0.232637	-0.137268	0.336752	-0.470142	0.300213	0.398101	-0.332853	-0.213342	-0.17677	0.455257	-0.152105	0.368522	0.538211	0.357545	0.358533	0.151634	0.334828	0.434519	0.469083	-0.321098	0.209423	-0.213309	0.28248
'cholesterol oxidase [EC:1.1.3.6]'	1	K03333	0	0.329519	0	-0.339024	0	0.411898	-0.35249	0	0	0	0.354866	-0.346549	0	-0.394472	0	0.346602	0	0.379818	0	-0.41975	0	0	0.383382	0	0	0	0.387343	0	0	0.439558	-0.389184	-0.414734	0	0	-0.40087	0	0.405561	0	0	0	0	0.426156	0	0	0	0	0
'putative iron-regulated protein'	1	K07231	0	0	0	0	0	0	0	0	0	0	0	0	0	0	0	0	0	0	0	0	0	0	0	0	0	0	0	0	0	0	0	0	0	0	0	0	0	0	0	0	0	0	0	0	0	0	0
'cytolethal distending toxin subunit B'	1	K11014	0.110338	0.405324	0.440452	-0.118445	0.223638	-0.051341	0.117544	0.276521	0.233286	0.32561	-0.0553943	0.0860188	-0.315702	-0.407125	0.500426	0.322732	-0.129723	0.268865	0.0520325	-0.42144	0.408927	0.119345	0.40037	0.314802	0.230655	0.0504403	0.189151	-0.20472	0.281925	0.28111	-0.376108	0	0.207166	0.204463	0	0.219426	0.298138	0.379261	0.425655	0.29913	0.431736	0.41343	0.516563	-0.256147	-0.137852	-0.481885	0.222287
'cytolethal distending toxin subunit C'	1	K11015	0.110338	0.405324	0.440452	-0.118445	0.223638	-0.051341	0.117544	0.276521	0.233286	0.32561	-0.0553943	0.0860188	-0.315702	-0.407125	0.500426	0.322732	-0.129723	0.268865	0.0520325	-0.42144	0.408927	0.119345	0.40037	0.314802	0.230655	0.0504403	0.189151	-0.20472	0.281925	0.28111	-0.376108	0	0.207166	0.204463	0	0.219426	0.298138	0.379261	0.425655	0.29913	0.431736	0.41343	0.516563	-0.256147	-0.137852	-0.481885	0.222287
'cytolethal distending toxin subunit A'	1	K11013	0.110338	0.405324	0.440452	-0.118445	0.223638	-0.051341	0.117544	0.276521	0.233286	0.32561	-0.0553943	0.0860188	-0.315702	-0.407125	0.500426	0.322732	-0.129723	0.268865	0.0520325	-0.42144	0.408927	0.119345	0.40037	0.314802	0.230655	0.0504403	0.189151	-0.20472	0.281925	0.28111	-0.376108	0	0.207166	0.204463	0	0.219426	0.298138	0.379261	0.425655	0.29913	0.431736	0.41343	0.516563	-0.256147	-0.137852	-0.481885	0.222287
'None'	1	K06882	0.110338	0.405324	0.440452	-0.118445	0.223638	-0.051341	0.117544	0.276521	0.233286	0.32561	-0.0553943	0.0860188	-0.315702	-0.407125	0.500426	0.322732	-0.129723	0.268865	0.0520325	-0.42144	0.408927	0.119345	0.40037	0.314802	0.230655	0.0504403	0.189151	-0.20472	0.281925	0.28111	-0.376108	0	0.207166	0.204463	0	0.219426	0.298138	0.379261	0.425655	0.29913	0.431736	0.41343	0.516563	-0.256147	-0.137852	-0.481885	0.222287
'2'',3''-cyclic-nucleotide 3''-phosphodiesterase [EC:3.1.4.37]'	1	K01121	0.110338	0.405324	0.440452	-0.118445	0.223638	-0.051341	0.117544	0.276521	0.233286	0.32561	-0.0553943	0.0860188	-0.315702	-0.407125	0.500426	0.322732	-0.129723	0.268865	0.0520325	-0.42144	0.408927	0.119345	0.40037	0.314802	0.230655	0.0504403	0.189151	-0.20472	0.281925	0.28111	-0.376108	0	0.207166	0.204463	0	0.219426	0.298138	0.379261	0.425655	0.29913	0.431736	0.41343	0.516563	-0.256147	-0.137852	-0.481885	0.222287
'ethylbenzene dioxygenase ferredoxin component'	1	K14750	0	0	0	0	0	0	0	0	0	0	0	0	0	0	0	0	0	0	0	0	0	0	0	0	0	0	0	0	0	0	0	0	0	0	0	0	0	0	0	0	0	0	0	0	0	0	0
'2,3-dihydroxyethylbenzene 1,2-dioxygenase [EC:1.13.11.-]'	1	K14751	0	0	0	0	0	0	0	0	0	0	0	0	0	0	0	0	0	0	0	0	0	0	0	0	0	0	0	0	0	0	0	0	0	0	0	0	0	0	0	0	0	0	0	0	0	0	0
'molecular chaperone HchA (Hsp31)'	1	K05523	-0.129368	0.101717	0.125418	-0.420693	0.26964	0.400942	-0.295275	0.404893	0.119493	0.299225	0.227135	-0.370329	-0.0622152	-0.403905	0.24001	0.396559	-0.174822	0.317989	0.23807	-0.372417	0.148131	-0.198496	0.132331	-0.238985	0.221771	-0.081966	0.275524	-0.283468	0.10468	0.363527	-0.245936	-0.319025	-0.234048	0.381191	-0.462241	0.38186	0.45822	0.10272	-0.0730893	0.129408	0.0558047	0.190596	0	-0.248975	0.253876	0.118505	0.31705
'two-component system, NarL family, sensor kinase [EC:2.7.13.3]'	1	K02480	0	0	0	0	0	0	0	0	0	0	0	0	0	0	0	0	0	0	0	0	0	0	0	0	0	0	0	0	0	0	0	0	0	0	0	0	0	0	0	0	0	0	0	0	0	0	0
'type IV pili sensor histidine kinase and response regulator'	1	K02487	0	0	0	0	0	0	0	0.621483	0	0	0	0	0	0	0	0	0	0	0	0	0	0	0	0	0	0	0	0	0	0	0	0	0	0	0	0	0	0	0	0	0	0	0	0	0	0	0
'hypothetical protein'	1	K09950	-0.34944	0.25433	0.14513	-0.410028	0.211387	0.29801	-0.396642	0.405096	0.281102	0.29801	0.233899	-0.370575	0	-0.416369	-0.155017	0.208568	-0.242038	0.46498	0.329109	-0.173364	0	-0.636177	0.286738	0	0.291758	0	0.424118	-0.452368	0.390302	0.331576	0	-0.490065	-0.310691	0.305055	-0.477734	0.148721	0.376916	0.306511	0	0.147641	0.146562	0.252217	0.18881	-0.306957	0.284006	-0.331827	0.194828
'uncharacterized oxidoreductase [EC:1.-.-.-]'	1	K14189	-0.258056	0.266613	0.0166633	-0.477382	0.156299	0.414331	-0.254904	0.302642	0.193655	0.188701	0.27517	-0.348579	-0.1878	-0.372898	-0.025224	0.448627	-0.130399	0.308947	0.143483	-0.436082	0.0891713	-0.382356	0.183747	-0.0396317	0.259487	-0.153122	0.252202	-0.487814	0.356235	0.24417	-0.263951	-0.408088	-0.189602	0.306245	-0.393224	0.176171	0.334617	0.354487	-0.127471	0.0756836	0.0912118	0.231485	0.194556	-0.130664	0.0594657	-0.343174	0.100446
'None'	1	K00947	-0.185658	0.256761	0.162945	-0.439457	0.238034	0.332802	-0.324902	0.482908	0.0197509	0.336752	0.415755	-0.347615	-0.262686	-0.400942	-0.111609	0.376311	-0.131857	0.395017	0.254864	-0.34377	0.141219	-0.40983	0.257749	-0.138256	0.261779	-0.114555	0.374279	-0.44545	0.238985	0.283511	-0.403967	-0.532367	-0.294288	0.435506	-0.324951	0.138319	0.503647	0.309148	-0.123462	0.150646	0.144203	0.268612	0.0483896	-0.345798	0.0464287	-0.150106	0.250874
'naphthalene 1,2-dioxygenase subunit alpha [EC:1.14.12.12]'	1	K14579	0	0	0	0	0	0	0	0	0	0	0	0	0	0	0	0	0	0	0	0	0	0	0	0	0	0	0	0	0	0	0	0	0	0	0	0	0	0	0	0	0	0	0	0	0	0	0
'conjugal transfer pilin signal peptidase TrbI'	1	K12062	-0.136407	0.0953028	-0.202609	-0.219706	0.164804	0.34229	-0.255717	0.387759	-0.110217	0.0571089	0.188787	-0.303368	0.312826	-0.134224	-0.0607557	0.16626	-0.0965906	0.185513	0.196667	-0.193393	-0.0974853	-0.230618	-0.0709315	-0.147683	-0.0383875	-0.181512	0.158232	-0.241749	0.159687	0.169196	0.0289226	-0.299595	-0.0611102	0.220797	-0.0607557	-0.022199	0.120402	0.162622	-0.302505	-0.110068	-0.174627	0.0254626	0.0265538	-0.0746031	0.170651	-0.240439	-0.0363807
'conjugal transfer pilus assembly protein TraV'	1	K12064	-0.136407	0.0953028	-0.202609	-0.219706	0.164804	0.34229	-0.255717	0.387759	-0.110217	0.0571089	0.188787	-0.303368	0.312826	-0.134224	-0.0607557	0.16626	-0.0965906	0.185513	0.196667	-0.193393	-0.0974853	-0.230618	-0.0709315	-0.147683	-0.0383875	-0.181512	0.158232	-0.241749	0.159687	0.169196	0.0289226	-0.299595	-0.0611102	0.220797	-0.0607557	-0.022199	0.120402	0.162622	-0.302505	-0.110068	-0.174627	0.0254626	0.0265538	-0.0746031	0.170651	-0.240439	-0.0363807
'conjugal transfer pilus assembly protein TraB'	1	K12065	-0.136407	0.0953028	-0.202609	-0.219706	0.164804	0.34229	-0.255717	0.387759	-0.110217	0.0571089	0.188787	-0.303368	0.312826	-0.134224	-0.0607557	0.16626	-0.0965906	0.185513	0.196667	-0.193393	-0.0974853	-0.230618	-0.0709315	-0.147683	-0.0383875	-0.181512	0.158232	-0.241749	0.159687	0.169196	0.0289226	-0.299595	-0.0611102	0.220797	-0.0607557	-0.022199	0.120402	0.162622	-0.302505	-0.110068	-0.174627	0.0254626	0.0265538	-0.0746031	0.170651	-0.240439	-0.0363807
'taurine dehydrogenase large subunit [EC:1.4.2.-]'	1	K07256	0	0	0	0	0	0	0	0	0	0	0	0	0	0	0	0	0	0	0	0	0	0	0	0	0	0	0	0	0	0	0	0	0	0	0	0	0	0	0	0	0	0	0	0	0	0	0
'4-oxalocrotonate decarboxylase [EC:4.1.1.77]'	1	K01617	-0.145864	0.10476	-0.196062	-0.225526	0.177901	0.334287	-0.267357	0.400126	-0.124039	0.0607464	0.201882	-0.310643	0.311371	-0.134224	-0.0774908	0.16626	-0.095863	0.194243	0.203217	-0.185388	-0.108398	-0.237893	-0.0592914	-0.15132	-0.0332934	-0.176419	0.169144	-0.245388	0.163324	0.196122	0.0274674	-0.298867	-0.0749327	0.232437	-0.0636662	-0.0283856	0.132042	0.174991	-0.311237	-0.0966054	-0.175355	0.0305551	0.0112763	-0.0913433	0.162646	-0.241894	-0.0378359
'hypothetical protein'	1	K07338	0	0	0	0	0	0	0	0	0	0	0	0	0	0	0	0	0	0	0	0	0	0	0	0	0	0	0	0	0	0	0	0	0	0	0	0	0	0	0	0	0	0	0	0	0	0	0
'trimethylamine dehydrogenase [EC:1.5.8.2]'	1	K00317	-0.206265	0.380554	0.479633	-0.306695	0.346154	0.244095	-0.21212	0.358937	0.38776	0.329213	0.226981	-0.171137	-0.529173	-0.48774	0.369352	0.503579	-0.22589	0.411629	0.110822	-0.516045	0.317053	-0.078813	0.439551	0.277872	0.22615	-0.0896216	0.35038	-0.444798	0.352182	0.337423	-0.400431	-0.279041	-0.131055	0.435498	-0.152695	0.278225	0.536379	0.381513	0.345929	0.250251	0.375658	0.462069	0.469725	-0.36969	0.0819905	-0.205815	0.348407
'None'	1	K06992	-0.0158773	0.483124	0.427175	-0.364422	0.314192	0.02495	-0.0695577	0.421127	0.19204	0.461198	0.159529	-0.0748501	-0.396933	-0.565534	0.486978	0.400396	-0.246514	0.425663	0.213653	-0.554363	0.455149	-0.0929956	0.46649	0.0680456	0.420499	-0.0347789	0.365178	-0.37582	0.325107	0.313105	-0.583013	-0.184507	0.0476319	0.372739	-0.215511	0.353621	0.508074	0.455219	0.286591	0.333525	0.434802	0.44154	0.38786	-0.44439	-0.0862174	-0.483124	0.33045
'formate dehydrogenase, delta subunit [EC:1.2.1.2]'	1	K00126	0	0	0	0	0	0	0	0	0	0	0	0	0	0	0	0	0	0	0	0	0	0	0	0	0	0	0	0	0	0	0	0	0	0	0	0	0	0	0	0	0	0	0	0	0	0	0
'pyruvate carboxylase subunit A [EC:6.4.1.1]'	1	K01959	-0.0158773	0.483124	0.427175	-0.364422	0.314192	0.02495	-0.0695577	0.421127	0.19204	0.461198	0.159529	-0.0748501	-0.396933	-0.565534	0.486978	0.400396	-0.246514	0.425663	0.213653	-0.554363	0.455149	-0.0929956	0.46649	0.0680456	0.420499	-0.0347789	0.365178	-0.37582	0.325107	0.313105	-0.583013	-0.184507	0.0476319	0.372739	-0.215511	0.353621	0.508074	0.455219	0.286591	0.333525	0.434802	0.44154	0.38786	-0.44439	-0.0862174	-0.483124	0.33045
'urease subunit gamma/beta [EC:3.5.1.5]'	1	K14048	0.110338	0.405324	0.440452	-0.118445	0.223638	-0.051341	0.117544	0.276521	0.233286	0.32561	-0.0553943	0.0860188	-0.315702	-0.407125	0.500426	0.322732	-0.129723	0.268865	0.0520325	-0.42144	0.408927	0.119345	0.40037	0.314802	0.230655	0.0504403	0.189151	-0.20472	0.281925	0.28111	-0.376108	0	0.207166	0.204463	0	0.219426	0.298138	0.379261	0.425655	0.29913	0.431736	0.41343	0.516563	-0.256147	-0.137852	-0.481885	0.222287
'trimethylamine-N-oxide reductase (cytochrome c) 1, cytochrome c-type subunit TorC'	1	K03532	0.110338	0.405324	0.440452	-0.118445	0.223638	-0.051341	0.117544	0.276521	0.233286	0.32561	-0.0553943	0.0860188	-0.315702	-0.407125	0.500426	0.322732	-0.129723	0.268865	0.0520325	-0.42144	0.408927	0.119345	0.40037	0.314802	0.230655	0.0504403	0.189151	-0.20472	0.281925	0.28111	-0.376108	0	0.207166	0.204463	0	0.219426	0.298138	0.379261	0.425655	0.29913	0.431736	0.41343	0.516563	-0.256147	-0.137852	-0.481885	0.222287
'None'	1	K01564	-0.0158773	0.483124	0.427175	-0.364422	0.314192	0.02495	-0.0695577	0.421127	0.19204	0.461198	0.159529	-0.0748501	-0.396933	-0.565534	0.486978	0.400396	-0.246514	0.425663	0.213653	-0.554363	0.455149	-0.0929956	0.46649	0.0680456	0.420499	-0.0347789	0.365178	-0.37582	0.325107	0.313105	-0.583013	-0.184507	0.0476319	0.372739	-0.215511	0.353621	0.508074	0.455219	0.286591	0.333525	0.434802	0.44154	0.38786	-0.44439	-0.0862174	-0.483124	0.33045
'glutathionylspermidine synthase [EC:6.3.1.8]'	1	K01917	0.110338	0.405324	0.440452	-0.118445	0.223638	-0.051341	0.117544	0.276521	0.233286	0.32561	-0.0553943	0.0860188	-0.315702	-0.407125	0.500426	0.322732	-0.129723	0.268865	0.0520325	-0.42144	0.408927	0.119345	0.40037	0.314802	0.230655	0.0504403	0.189151	-0.20472	0.281925	0.28111	-0.376108	0	0.207166	0.204463	0	0.219426	0.298138	0.379261	0.425655	0.29913	0.431736	0.41343	0.516563	-0.256147	-0.137852	-0.481885	0.222287
'dihydropyrimidine dehydrogenase (NADP+) [EC:1.3.1.2]'	1	K00207	0	0	0	0	0	0	0	0	0	0	0	0	0	0	0	0	0	0	0	0	0	0	0	0	0	0	0	0	0	0	0	0	0	0	0	0	0	0	0	0	0	0	0	0	0	0	0
'hypothetical protein'	1	K09804	0	0.406225	0.438651	0	0	0	0	0	0	0	0	0	0	-0.402622	0.498625	0	0	0	0	-0.411079	0.416133	0	0.398569	0	0	0	0	0	0	0	-0.378811	0	0	0	0	0	0	0.381063	0.422052	0	0.428133	0.41253	0.511159	0	0	-0.474679	0
'DNA glycosylase [EC:3.2.2.-]'	1	K01249	-0.157148	0.360155	0.260609	-0.419994	0.298963	-0.0637541	-0.0234883	0.267879	-0.142049	0.322685	0.137575	-0.265083	-0.197973	-0.19294	0.0531365	0.402159	-0.0433482	0.250542	0.267681	-0.222089	0.241035	-0.083887	0.343936	-0.186229	0.378725	-0.0335548	0.279623	-0.209749	0.320448	0.260129	-0.279107	-0.0609672	-0.187348	0.238798	-0.285819	0.248139	0.205243	0.348464	-0.10012	0.416206	0.283861	0.293045	-0.0676688	-0.105466	-0.0987371	-0.0503322	0.238275
'allantoin permease'	1	K10975	-0.0538352	0.58964	0.580547	-0.46451	0.407827	0.0658389	-0.0207338	0.482698	0.204792	0.515435	0.124403	-0.221888	-0.357567	-0.558358	0.514423	0.597916	-0.190817	0.524165	0.268348	-0.476296	0.54308	0.0411039	0.609647	0.0367389	0.544884	0.112035	0.430317	-0.39855	0.496156	0.387331	-0.661218	-0.101684	0.0556539	0.293911	-0.494777	0.454533	0.479788	0.531158	0.304142	0.399521	0.593187	0.638019	0.353566	-0.385207	0.0362043	-0.254989	0.456395
'hypothetical protein'	1	K09860	0.110338	0.405324	0.440452	-0.118445	0.223638	-0.051341	0.117544	0.276521	0.233286	0.32561	-0.0553943	0.0860188	-0.315702	-0.407125	0.500426	0.322732	-0.129723	0.268865	0.0520325	-0.42144	0.408927	0.119345	0.40037	0.314802	0.230655	0.0504403	0.189151	-0.20472	0.281925	0.28111	-0.376108	0	0.207166	0.204463	0	0.219426	0.298138	0.379261	0.425655	0.29913	0.431736	0.41343	0.516563	-0.256147	-0.137852	-0.481885	0.222287
'malate dehydrogenase (decarboxylating) [EC:1.1.1.39]'	1	K00028	0	0.507318	0.51261	-0.34552	0.301715	0	0	0.424151	0.331911	0.415834	0	0	-0.332667	-0.574607	0.546716	0.512688	0	0.473295	0	-0.443566	0.471783	0	0.531512	0	0.438272	0	0.353081	-0.369393	0.408273	0.434112	-0.631408	0	0	0	-0.480929	0.399005	0.476319	0.477148	0.366746	0.285879	0.500968	0.588216	0.433224	-0.369127	0	-0.362154	0.374686
'zona occludens toxin'	1	K10954	0	0	0	0	0	0	0	0	0	0	0	0	0	0	0	0	0	0	0	0	0	0	0	0	0	0	0	0	0	0	0	0	0	0	0	0	0	0	0	0	0	0	0	0	0	0	0
'choline monooxygenase [EC:1.14.15.7]'	1	K00499	0	0	0	0	0	0	0	0	0	0	0	0	0	0	0	0	0	0	0	0	0	0	0	0	0	0	0	0	0	0	0	0	0	0	0	0	0	0	0	0	0	0	0	0	0	0	0
'2-hydroxychromene-2-carboxylate isomerase [EC:5.99.1.4]'	1	K14584	0	0	0	0	0	0	0	0	0	0	0	0	0	0	0	0	0	0	0	0	0	0	0	0	0	0	0	0	0	0	0	0	0	0	0	0	0	0	0	0	0	0	0	0	0	0	0
'hypothetical protein'	1	K09190	0	0	0	0	0	0	0	0	0	0	0	0	0	0	0	0	0	0	0	0	0	-0.585613	0	0	0	0	0	0	0	0	0	0	0	0	0	0	0	0	0	0	0	0	0	0	0	0	0
'ethylbenzene dioxygenase beta subunit [EC:1.14.12.-]'	1	K14749	0	0	0	0	0	0	0	0	0	0	0	0	0	0	0	0	0	0	0	0	0	0	0	0	0	0	0	0	0	0	0	0	0	0	0	0	0	0	0	0	0	0	0	0	0	0	0
'exodeoxyribonuclease (lambda-induced) [EC:3.1.11.3]'	1	K01143	0	0	0	0	0	0.5489	0	0	0	0	0	-0.486335	0	0	0	0	0	0	0	0	0	0	0	0	0	0	0	0	0	0	0	-0.457487	0	0	0	0	0	0	0	0	0	0	0	0	0	0	0
'DNA-directed RNA polymerase subunit beta-beta'' [EC:2.7.7.6]'	1	K13797	0.110338	0.405324	0.440452	-0.118445	0.223638	-0.051341	0.117544	0.276521	0.233286	0.32561	-0.0553943	0.0860188	-0.315702	-0.407125	0.500426	0.322732	-0.129723	0.268865	0.0520325	-0.42144	0.408927	0.119345	0.40037	0.314802	0.230655	0.0504403	0.189151	-0.20472	0.281925	0.28111	-0.376108	0	0.207166	0.204463	0	0.219426	0.298138	0.379261	0.425655	0.29913	0.431736	0.41343	0.516563	-0.256147	-0.137852	-0.481885	0.222287
'hypothetical protein'	1	K09944	0.110338	0.405324	0.440452	-0.118445	0.223638	-0.051341	0.117544	0.276521	0.233286	0.32561	-0.0553943	0.0860188	-0.315702	-0.407125	0.500426	0.322732	-0.129723	0.268865	0.0520325	-0.42144	0.408927	0.119345	0.40037	0.314802	0.230655	0.0504403	0.189151	-0.20472	0.281925	0.28111	-0.376108	0	0.207166	0.204463	0	0.219426	0.298138	0.379261	0.425655	0.29913	0.431736	0.41343	0.516563	-0.256147	-0.137852	-0.481885	0.222287
'hypothetical protein'	1	K09947	0	0	0	0	0	0	0	0	0	0	0	0	0	0	0	0	0	0	0	0	0	0	0	0	0	0	0	0	0	0	0	0	0	0	0	0	0	0	0	0	0	0	0	0	0	0	0
'23S rRNA (adenine2085-N6)-dimethyltransferase [EC:2.1.1.184]; rRNA (adenine-N6-)-methyltransferase [EC:2.1.1.48]'	1	K00561	0.0549522	0.358598	0.499501	-0.265602	0.245913	0.200787	0.0619974	0.332531	0.386074	0.394529	-0.0112722	-0.133153	-0.345213	-0.58193	0.657413	0.499225	-0.249437	0.398051	0.124737	-0.579641	0.485411	0.0422709	0.414255	0.207128	0.317481	0.0584748	0.293783	-0.346322	0.28392	0.315015	-0.583075	-0.122604	0.091587	0.248694	-0.428411	0.421846	0.412846	0.31849	0.455186	0.238904	0.394941	0.511478	0.469912	-0.328807	0.0387602	-0.231786	0.405511
'ribonuclease T1 [EC:3.1.27.3]'	1	K01167	0	0	0	0	0	0	0	0	0	0	0	0	0	0	0	0	0	0	0	0	0	0	0	0	0	0	0	0	0	0	0	0	0	0	0	0	0	0	0	0	0	0	0	0	0	0	0
'conjugal transfer pilus assembly protein TraI'	1	K12070	0	0	0	0	0	0	0	0	0	0	0	0	0	0	0	0	0	0	0	0	0	0	0	0	0	0	0	0	0	0	0	0	0	0	0	0	0	0	0	0	0	0	0	0	0	0	0
'PhnO protein [EC:2.3.1.-]'	2	K09994	0	0	0	0	0	0	0	0	0	0.428929	0	0	0	0	0	0	0	0	0.426485	0	0	0	0	0	0.502749	0	0	0	0	0	0	0	0	0	0	0.480042	0	0	0	0	0	0	0	0	0	0	0
'aminoglycoside N6''-acetyltransferase [EC:2.3.1.82]'	2	K00663	0.0234379	0.218502	0.207161	-0.0710698	0.0344061	-0.130799	0.0378031	0.138359	-0.0332667	0.141384	0.153481	0.02495	-0.116434	-0.246476	0.0370527	0.140271	0.103596	0.198088	0.0601253	-0.121385	0.240428	0.061241	0.187503	-0.0703138	0.381172	0.152725	0.0226819	-0.210217	0.218502	0.116847	-0.257857	0.130063	0.0756062	-0.0657774	-0.326669	0.266634	0.111141	0.262394	-0.0529324	0.164116	0.131953	0.165578	-0.0536804	-0.0521922	0.28361	-0.104337	0.124013
'arginine/ornithine transport system substrate-binding protein'	2	K10022	0	0	0	-0.428383	0	0	-0.44516	0.462497	0	0	0.479833	-0.379728	0	-0.412165	0	0.346226	0	0.405454	0	-0.382082	0	-0.421672	0	0	0	0	0.369662	-0.479907	0	0.347957	-0.337836	-0.497246	-0.373017	0.462497	-0.355176	0	0.511151	0	0	0	0	0	0	0	0	0	0
'4-guanidinobutyraldehyde dehydrogenase / NAD-dependent aldehyde dehydrogenase [EC:1.2.1.54 1.2.1.-]'	2	K12254	0	0	0	-0.428383	0	0	-0.44516	0.462497	0	0	0.479833	-0.379728	0	-0.412165	0	0.346226	0	0.405454	0	-0.382082	0	-0.421672	0	0	0	0	0.369662	-0.479907	0	0.347957	-0.337836	-0.497246	-0.373017	0.462497	-0.355176	0	0.511151	0	0	0	0	0	0	0	0	0	0
'serralysin [EC:3.4.24.40]'	2	K01406	0	0	0	-0.428383	0	0	-0.44516	0.462497	0	0	0.479833	-0.379728	0	-0.412165	0	0.346226	0	0.405454	0	-0.382082	0	-0.421672	0	0	0	0	0.369662	-0.479907	0	0.347957	-0.337836	-0.497246	-0.373017	0.462497	-0.355176	0	0.511151	0	0	0	0	0	0	0	0	0	0
'putative cyclase [EC:4.6.1.-]'	3	K05345	0.312759	-0.429315	-0.379455	0.421544	-0.0900209	-0.104253	0.198793	-0.302398	-0.125622	-0.490831	-0.121089	0.33089	0.343193	0.315349	-0.473096	-0.29532	0.405418	-0.424135	-0.488389	0.296337	-0.455216	0.159941	-0.451979	-0.210448	-0.443048	0.340603	-0.446151	0.0871066	-0.167064	-0.526282	0.421933	0.123698	0.113318	-0.135982	0.234767	-0.295411	-0.329595	-0.324788	-0.335474	-0.532111	-0.514868	-0.34384	-0.173539	0.101062	-0.20695	0.226637	-0.53624
'glycogen(starch) synthase [EC:2.4.1.11]'	3	K00693	0.428444	-0.442524	-0.279595	0.575952	-0.0482827	-0.250764	0.293675	-0.323847	-0.155554	-0.541757	-0.186397	0.492141	0.331223	0.39559	-0.482492	-0.402356	0.476792	-0.488788	-0.570092	0.459091	-0.475378	0.326529	-0.415705	-0.122029	-0.493632	0.42241	-0.473367	0.261532	-0.269538	-0.453391	0.455668	0.298749	0.170305	-0.188408	0.321214	-0.286431	-0.362736	-0.353068	-0.235714	-0.438635	-0.494228	-0.324518	-0.21791	0.122421	-0.312209	0.30038	-0.549216
'None'	3	K06026	0.428444	-0.442524	-0.279595	0.575952	-0.0482827	-0.250764	0.293675	-0.323847	-0.155554	-0.541757	-0.186397	0.492141	0.331223	0.39559	-0.482492	-0.402356	0.476792	-0.488788	-0.570092	0.459091	-0.475378	0.326529	-0.415705	-0.122029	-0.493632	0.42241	-0.473367	0.261532	-0.269538	-0.453391	0.455668	0.298749	0.170305	-0.188408	0.321214	-0.286431	-0.362736	-0.353068	-0.235714	-0.438635	-0.494228	-0.324518	-0.21791	0.122421	-0.312209	0.30038	-0.549216
'saccharopine dehydrogenase (NADP+, L-glutamate forming) [EC:1.5.1.10]'	3	K00293	0.428444	-0.442524	-0.279595	0.575952	-0.0482827	-0.250764	0.293675	-0.323847	-0.155554	-0.541757	-0.186397	0.492141	0.331223	0.39559	-0.482492	-0.402356	0.476792	-0.488788	-0.570092	0.459091	-0.475378	0.326529	-0.415705	-0.122029	-0.493632	0.42241	-0.473367	0.261532	-0.269538	-0.453391	0.455668	0.298749	0.170305	-0.188408	0.321214	-0.286431	-0.362736	-0.353068	-0.235714	-0.438635	-0.494228	-0.324518	-0.21791	0.122421	-0.312209	0.30038	-0.549216
'putative membrane protein'	3	K08977	0.428444	-0.442524	-0.279595	0.575952	-0.0482827	-0.250764	0.293675	-0.323847	-0.155554	-0.541757	-0.186397	0.492141	0.331223	0.39559	-0.482492	-0.402356	0.476792	-0.488788	-0.570092	0.459091	-0.475378	0.326529	-0.415705	-0.122029	-0.493632	0.42241	-0.473367	0.261532	-0.269538	-0.453391	0.455668	0.298749	0.170305	-0.188408	0.321214	-0.286431	-0.362736	-0.353068	-0.235714	-0.438635	-0.494228	-0.324518	-0.21791	0.122421	-0.312209	0.30038	-0.549216
'None'	3	K01970	0.428444	-0.442524	-0.279595	0.575952	-0.0482827	-0.250764	0.293675	-0.323847	-0.155554	-0.541757	-0.186397	0.492141	0.331223	0.39559	-0.482492	-0.402356	0.476792	-0.488788	-0.570092	0.459091	-0.475378	0.326529	-0.415705	-0.122029	-0.493632	0.42241	-0.473367	0.261532	-0.269538	-0.453391	0.455668	0.298749	0.170305	-0.188408	0.321214	-0.286431	-0.362736	-0.353068	-0.235714	-0.438635	-0.494228	-0.324518	-0.21791	0.122421	-0.312209	0.30038	-0.549216
'putative ribose uptake protein'	4	K06216	0	0.460613	0.539824	0	0	0	0	0.340608	0.426156	0.359619	0	0	-0.346945	-0.539428	0.653196	0.465239	0	0.390511	0	-0.425494	0.529131	0	0.49705	0	0.370624	0	0	0	0.348133	0.319121	-0.617744	0	0	0	-0.404039	0.431701	0.389719	0.398097	0.50188	0	0.536342	0.590123	0.544181	0	0	-0.343381	0.376113
'methylated-DNA-[protein]-cysteine S-methyltransferase [EC:2.1.1.63]'	4	K13531	0.139115	0.424907	0.495977	-0.147432	0.187532	0.240428	0.14592	0.329643	0.390884	0.356105	-0.0287304	0.0105849	-0.289572	-0.495221	0.661655	0.451438	-0.122501	0.347789	0.041218	-0.390247	0.576119	0.212453	0.461198	0.26689	0.312349	0.128531	0.240428	-0.212486	0.291084	0.322937	-0.610613	0.02571	0.380299	0.0793865	-0.382626	0.44439	0.309985	0.359184	0.450682	0.24882	0.477904	0.545877	0.492952	-0.165653	-0.0453776	-0.415078	0.349354
'AraC family transcriptional regulator, regulatory protein of adaptative response / methylphosphotriester-DNA alkyltransferase methyltransferase [EC:2.1.1.-]'	4	K13530	0	0.460613	0.539824	-0.218623	0.251336	0	0	0.340608	0.426156	0.359619	0	0	-0.346945	-0.539428	0.653196	0.465239	0	0.390511	0	-0.425494	0.529131	0	0.49705	0.254664	0.370624	0	0.2812	-0.260843	0.348133	0.319121	-0.617744	0	0.291497	0	-0.404039	0.431701	0.389719	0.398097	0.50188	0.241272	0.536342	0.590123	0.544181	-0.258743	0	-0.343381	0.376113
'coccolysin [EC:3.4.24.30]'	4	K08605	0	0.460613	0.539824	-0.218623	0.251336	0	0	0.340608	0.426156	0.359619	0	0	-0.346945	-0.539428	0.653196	0.465239	0	0.390511	0	-0.425494	0.529131	0	0.49705	0.254664	0.370624	0	0.2812	-0.260843	0.348133	0.319121	-0.617744	0	0.291497	0	-0.404039	0.431701	0.389719	0.398097	0.50188	0.241272	0.536342	0.590123	0.544181	-0.258743	0	-0.343381	0.376113
'carboxylesterase [EC:3.1.1.1]'	7	K01044	0	0	0	-0.428383	0	0	-0.44516	0.462497	0	0	0.479833	-0.379728	0	-0.412165	0	0.346226	0	0.405454	0	-0.382082	0	-0.421672	0	0	0	0	0.369662	-0.479907	0	0.347957	-0.337836	-0.497246	-0.373017	0.462497	-0.355176	0	0.511151	0	0	0	0	0	0	0	0	0	0
'carnitinyl-CoA dehydratase [EC:4.2.1.-]'	7	K08299	0	0	0	-0.431738	0	0	-0.450753	0.464734	0	0	0.48207	-0.386439	0	-0.403217	0	0.343989	0	0.406572	0	-0.370894	0	-0.428383	0	0	0	0	0.373017	-0.482144	0	0.363621	-0.327768	-0.492771	-0.379728	0.464734	-0.35182	0	0.510033	0	0	0	0	0	0	0	0	0	0
'cytochrome P450 / NADPH-cytochrome P450 reductase [EC:1.14.14.1 1.6.2.4]'	7	K14338	0	0	0	-0.428383	0	0	-0.44516	0.462497	0	0	0.479833	-0.379728	0	-0.412165	0	0.346226	0	0.405454	0	-0.382082	0	-0.421672	0	0	0	0	0.369662	-0.479907	0	0.347957	-0.337836	-0.497246	-0.373017	0.462497	-0.355176	0	0.511151	0	0	0	0	0	0	0	0	0	0
'benzoate 1,2-dioxygenase alpha subunit [EC:1.14.12.10]'	7	K05549	0	0	0	-0.428383	0	0	-0.44516	0.462497	0	0	0.479833	-0.379728	0	-0.412165	0	0.346226	0	0.405454	0	-0.382082	0	-0.421672	0	0	0	0	0.369662	-0.479907	0	0.347957	-0.337836	-0.497246	-0.373017	0.462497	-0.355176	0	0.511151	0	0	0	0	0	0	0	0	0	0
'benzoate 1,2-dioxygenase electron transfer component'	7	K05784	0	0	0	-0.428383	0	0	-0.44516	0.462497	0	0	0.479833	-0.379728	0	-0.412165	0	0.346226	0	0.405454	0	-0.382082	0	-0.421672	0	0	0	0	0.369662	-0.479907	0	0.347957	-0.337836	-0.497246	-0.373017	0.462497	-0.355176	0	0.511151	0	0	0	0	0	0	0	0	0	0
'hemolysin'	7	K11016	0	0	0	-0.428383	0	0	-0.44516	0.462497	0	0	0.479833	-0.379728	0	-0.412165	0	0.346226	0	0.405454	0	-0.382082	0	-0.421672	0	0	0	0	0.369662	-0.479907	0	0.347957	-0.337836	-0.497246	-0.373017	0.462497	-0.355176	0	0.511151	0	0	0	0	0	0	0	0	0	0
'hemolysin activation/secretion protein??'	7	K11017	0	0	0	-0.428383	0	0	-0.44516	0.462497	0	0	0.479833	-0.379728	0	-0.412165	0	0.346226	0	0.405454	0	-0.382082	0	-0.421672	0	0	0	0	0.369662	-0.479907	0	0.347957	-0.337836	-0.497246	-0.373017	0.462497	-0.355176	0	0.511151	0	0	0	0	0	0	0	0	0	0
'geranyl-CoA carboxylase alpha subunit [EC:6.4.1.5]'	7	K13777	0	0	0	-0.428383	0	0	-0.44516	0.462497	0	0	0.479833	-0.379728	0	-0.412165	0	0.346226	0	0.405454	0	-0.382082	0	-0.421672	0	0	0	0	0.369662	-0.479907	0	0.347957	-0.337836	-0.497246	-0.373017	0.462497	-0.355176	0	0.511151	0	0	0	0	0	0	0	0	0	0
'geranyl-CoA carboxylase beta subunit [EC:6.4.1.5]'	7	K13778	0	0	0	-0.428383	0	0	-0.44516	0.462497	0	0	0.479833	-0.379728	0	-0.412165	0	0.346226	0	0.405454	0	-0.382082	0	-0.421672	0	0	0	0	0.369662	-0.479907	0	0.347957	-0.337836	-0.497246	-0.373017	0.462497	-0.355176	0	0.511151	0	0	0	0	0	0	0	0	0	0
'citronellyl-CoA dehydrogenase [EC:1.3.99.-]'	7	K11731	0	0	0	-0.428383	0	0	-0.44516	0.462497	0	0	0.479833	-0.379728	0	-0.412165	0	0.346226	0	0.405454	0	-0.382082	0	-0.421672	0	0	0	0	0.369662	-0.479907	0	0.347957	-0.337836	-0.497246	-0.373017	0.462497	-0.355176	0	0.511151	0	0	0	0	0	0	0	0	0	0
'alpha-glucoside transport system permease protein'	7	K10233	-0.380339	0	0	-0.434097	0.198936	0.223097	-0.342709	0.249976	0	0.272823	0.323893	-0.452913	-0.170682	-0.275511	0	0.340073	-0.240605	0.28895	0.306515	-0.278284	0	-0.340021	0	-0.176058	0.207032	-0.169338	0.271479	-0.380397	0.178746	0.358946	0	-0.309157	-0.41797	0.400499	-0.327975	0	0.400499	0.176085	-0.172052	0.237953	0	0	0	-0.285049	0.205688	0	0.243293
'alpha-glucoside transport system substrate-binding protein'	7	K10232	-0.380339	0	0	-0.434097	0.198936	0.223097	-0.342709	0.249976	0	0.272823	0.323893	-0.452913	-0.170682	-0.275511	0	0.340073	-0.240605	0.28895	0.306515	-0.278284	0	-0.340021	0	-0.176058	0.207032	-0.169338	0.271479	-0.380397	0.178746	0.358946	0	-0.309157	-0.41797	0.400499	-0.327975	0	0.400499	0.176085	-0.172052	0.237953	0	0	0	-0.285049	0.205688	0	0.243293
'alpha-glucoside transport system permease protein'	7	K10234	-0.380339	0	0	-0.434097	0.198936	0.223097	-0.342709	0.249976	0	0.272823	0.323893	-0.452913	-0.170682	-0.275511	0	0.340073	-0.240605	0.28895	0.306515	-0.278284	0	-0.340021	0	-0.176058	0.207032	-0.169338	0.271479	-0.380397	0.178746	0.358946	0	-0.309157	-0.41797	0.400499	-0.327975	0	0.400499	0.176085	-0.172052	0.237953	0	0	0	-0.285049	0.205688	0	0.243293
'cobalamin biosynthetic protein CobC'	7	K02225	0	0	0	-0.431738	0	0	-0.450753	0.464734	0	0	0.48207	-0.386439	0	-0.403217	0	0.343989	0	0.406572	0	-0.370894	0	-0.428383	0	0	0	0	0.373017	-0.482144	0	0.363621	-0.327768	-0.492771	-0.379728	0.464734	-0.35182	0	0.510033	0	0	0	0	0	0	0	0	0	0
'pyrroloquinoline quinone biosynthesis protein E'	7	K06139	0	0	0	-0.428383	0	0	-0.44516	0.462497	0	0	0.479833	-0.379728	0	-0.412165	0	0.346226	0	0.405454	0	-0.382082	0	-0.421672	0	0	0	0	0.369662	-0.479907	0	0.347957	-0.337836	-0.497246	-0.373017	0.462497	-0.355176	0	0.511151	0	0	0	0	0	0	0	0	0	0
'pyrroloquinoline quinone biosynthesis protein B'	7	K06136	0	0	0	-0.428383	0	0	-0.44516	0.462497	0	0	0.479833	-0.379728	0	-0.412165	0	0.346226	0	0.405454	0	-0.382082	0	-0.421672	0	0	0	0	0.369662	-0.479907	0	0.347957	-0.337836	-0.497246	-0.373017	0.462497	-0.355176	0	0.511151	0	0	0	0	0	0	0	0	0	0
'outer membrane protein HasF'	7	K12538	0	0	0	-0.428383	0	0	-0.44516	0.462497	0	0	0.479833	-0.379728	0	-0.412165	0	0.346226	0	0.405454	0	-0.382082	0	-0.421672	0	0	0	0	0.369662	-0.479907	0	0.347957	-0.337836	-0.497246	-0.373017	0.462497	-0.355176	0	0.511151	0	0	0	0	0	0	0	0	0	0
		Categories	17	11	14	6	14	13	17	14	13	14	15	17	17	17	13	1	12	1	14	12	14	17	11	13	14	17	1	17	14	13	17	17	8	14	17	14	7	11	13	14	14	11	13	17	15	16	14
[truncated: 325 more columns]

## Sheet: OTU_MetadataCorrelations
	body weight (g)	lean mass	fat mass	Gastrocnemius muscle mass (g)	Sciatic response amplitude (mV)	Triceps muscle mass (g)	Radial response amplitude (mV)	Heart muscle mass	B12 total (pmol/L)	folate level (nmol/L)
Otu0005	-0.0982906	-0.224054	0.235653	-0.179487	-0.313797	0.195971	-0.145321	0.242369	-0.356696	0.202076
Otu0018	0.254579	-0.478632	0.547619	-0.411477	-0.509768	0.229548	-0.0109907	0.36569	-0.192701	0.28022
Otu0022	0	0	0	0	0	0	0	0	0	0
Otu0055	0.352259	-0.327228	0.403541	-0.300366	-0.37851	-0.218559	-0.234163	-0.0164835	-0.10597	0.5
Otu0098	0	0	0	0	0	0	0	0	0	0
Otu0126	0.466799	-0.481148	0.496718	-0.51931	-0.376431	-0.191726	-0.0748092	0.184399	-0.357666	0.163944
Otu0128	-0.136142	0.460928	-0.516484	0.200855	0.375458	-0.030525	0.176156	-0.213675	0.223546	-0.309524
Otu0134	0	0	0	0	0	0	0	0	0	0
Otu0143	0.296885	-0.270617	0.34942	-0.495419	-0.483812	-0.163714	-0.113945	0.0995724	-0.294576	0.256567
Otu0177	0.196917	-0.344986	0.430163	-0.197222	-0.250954	-0.0906732	0.127023	-0.149901	-0.279169	0.277515
Otu0178	-0.225885	0.19536	-0.31685	0.15812	0.391941	0.235653	0.207907	-0.101343	-0.119713	-0.391941
Otu0207	0.285104	-0.543346	0.52442	-0.396215	-0.379731	-0.107448	0.130362	0.131868	-0.427852	0.354701
Otu0212	0	-0.483034	0.553232	-0.345422	-0.426134	0	0	0.335217	0	0.367069
Otu0214	0.0733048	-0.23091	0.30788	-0.111179	-0.142334	0.0806353	0.216588	0.187538	-0.0449198	0.290165
Otu0222	0	0	0	0	0	0	0	0	0	0
Otu0229	0	0	0	0	0	0	0	0	0	0
Otu0232	0	0	0	0	0	0	0	0	0	0
Otu0245	0.0653635	-0.324985	0.308491	-0.235186	-0.343311	0.271228	0.127692	0.416616	-0.213293	0.152108
Otu0269	-0.287546	0.526862	-0.498168	0.383394	0.567766	0	0	-0.2558	0.447091	-0.224664
Otu0274	0.255551	-0.614555	0.544971	-0.313435	-0.325751	0.133626	0.0988488	0.480929	-0.151245	0.268483
Otu0299	0	0.529702	-0.49296	0.50337	0.548686	0	0	0	0.423037	-0.453156
Otu0319	0.255189	-0.366911	0.235043	-0.412088	-0.326618	0.0573871	-0.222867	0.106838	-0.347534	0.181929
Otu0349	-0.113623	-0.287111	0.361637	-0.0861332	-0.194258	0.115455	0.027188	0.138668	-0.173262	0.120342
Otu0354	0	0	0	0	0	0	0	0	0	0
Otu0371	0.246174	-0.458667	0.48255	-0.432335	-0.428661	0.088794	-0.0226613	0.227803	-0.155308	0.138396
Otu0408	0	0	0	0	0	0	0	0	0	0
Otu0420	0.213065	-0.562882	0.502442	-0.495116	-0.484127	0.270452	-0.193253	0.423077	-0.423882	0.163614
Otu0423	0.0670983	-0.196502	0.21152	-0.197141	-0.226856	-0.256891	-0.19078	0.120138	-0.139692	-0.0383419
Otu0426	0.327228	-0.437118	0.471306	-0.39072	-0.364469	-0.186813	0.191726	0.227106	-0.186593	0.423077
Otu0435	0.116118	-0.494737	0.442105	-0.444079	-0.50329	0.189474	-0.161044	0.426645	-0.37583	0.383224
Otu0482	0	0	0	0	0	0	0	0	0	0
Otu0486	0.100574	-0.369441	0.338598	-0.128734	-0.265515	0.0717426	-0.156248	0.235342	-0.322989	-0.17701
Otu0496	0	0	0	0	0	0	0	0	0	0
Otu0499	0.221457	-0.418307	0.444856	-0.229227	-0.347078	0.0524502	-0.0683252	0.483708	-0.108188	0.505076
Otu0502	-0.163004	0.315629	-0.357753	0.32967	0.368132	0.159951	-0.0607541	-0.105617	0.349366	-0.147131
Otu0513	0	0	0	0	0	0	0	0	0	0
Otu0538	-0.297664	-0.193253	0.151427	0.072966	-0.203938	0.433216	-0.243359	0.371241	-0.147831	0.140437
Otu0550	0	-0.232089	0.298226	0	0	0	0.323995	0.296388	0.230664	0.221679
Otu0557	0	0	0	-0.504835	0	0	0	0	0	0
Otu0558	0.195462	-0.433212	0.456392	-0.408779	-0.386539	0.0955384	-0.11341	0.230858	-0.339552	0.084575
Otu0560	0	0	0	0	0	0	0	0	0	0
Otu0570	0	0	0	0	0	0	0	0	0	0
Otu0575	-0.327652	0.485003	-0.560117	0.354848	0.604796	0.198145	0.0650871	-0.167064	0.330393	-0.169006
Otu0595	0	0	0	0	0	0	0	0	0	0
Otu0599	0.439071	-0.426824	0.536439	-0.618496	-0.533377	-0.207594	-0.136886	0.107165	-0.302038	0.172689
Otu0616	0.514797	-0.474156	0.518492	-0.448908	-0.57145	0	0	0.252472	0	0.484008
Otu0630	0.0796466	-0.117851	0.206563	-0.134687	-0.182604	-0.109433	-0.200442	0.107491	-0.117905	0.0932449
Otu0638	0	0	0	0	0	0	0	0	0	0
Otu0648	0.0958548	-0.272867	0.307055	-0.120138	-0.307694	0.137711	-0.0370695	0.319835	-0.0551417	0.242832
Otu0649	0.283215	-0.38537	0.398756	-0.164857	-0.200082	-0.0366348	0.279735	0.193037	-0.288984	0.140903
Otu0705	0.322506	-0.580645	0.596737	-0.480072	-0.514267	-0.12337	-0.0774536	0.308426	-0.160992	0.372793
Otu0725	-0.13891	0.116318	-0.171577	0.122424	0.332163	0.2824	0.185344	-0.124866	-0.182498	-0.0928103
Otu0726	0	0	0	0	0	0	0	0	0	0
Otu0728	-0.211096	0.278439	-0.157351	0.322472	0.280382	-0.0997202	0.0929353	-0.118499	0.208925	0.0459749
Otu0730	-0.0977311	-0.187944	0.218955	-0.0964781	-0.35866	0.0447934	-0.305613	0.454199	0.059543	0.118405
Otu0733	0.474695	-0.517254	0.591459	-0.524893	-0.591459	-0.259718	-0.313601	0.266993	-0.307329	0.154594
Otu0761	0	0.444444	-0.398657	0	0	0	0	-0.430403	0	0
Otu0782	0.110261	-0.101803	0.155054	-0.0895868	-0.0711056	-0.191077	-0.0411974	0.172282	-0.123943	0.181993
Otu0809	0.222064	-0.436139	0.466813	-0.307694	-0.370638	-0.102884	-0.16138	0.216632	-0.394623	0.210241
Otu0829	0	0	0	0	0	0	0	0	0	0
Otu0834	0.302961	-0.583553	0.623684	-0.515132	-0.614474	-0.0717105	-0.174862	0.349671	-0.442308	0.340132
Otu0874	0	0	0	0	0	0	0	0	0	0
Otu0875	-0.151404	0.419414	-0.363248	0.421245	0.465201	-0.046398	0.2363	-0.387668	0.30936	-0.362637
Otu0892	0.104295	-0.130211	0.249045	-0.0897573	-0.180779	-0.0176986	-0.146984	0.149174	0.0423697	0.275593
Otu0907	0	0	0	0	0	0	0	0	0	0
Otu0914	0.0907274	0.178431	-0.250257	0.109629	0.236647	-0.0415834	0.246514	-0.154237	0.249615	-0.37047
Otu0922	0	0	-0.442002	0	0.431624	0	0	0	0	0
Otu0929	-0.0990727	-0.0226637	0.077704	0.086122	-0.0446798	0.110081	0.0981163	0.248005	0.0482634	0.119794
Otu0937	0	0	0	0	0	0	0	0	0	0
Otu0954	0.457445	-0.690722	0.683197	-0.712901	-0.702603	-0.180205	-0.236085	0.396848	-0.461815	0.306547
Otu0959	0	0.519215	-0.463861	0	0.433865	0	0	0	0.501199	0
Otu0962	0.445733	-0.424668	0.491528	-0.411235	-0.373073	-0.0268661	-0.0647328	0.202107	-0.215944	0.579759
Otu0973	0	0	0	0	0	0	0	0	0	0
Otu0979	0.421951	-0.592187	0.544172	-0.614012	-0.529258	-0.209884	-0.148433	0.316463	-0.310422	0.239712
Otu1004	0	0	0	0	0	0	0	0	0	0
Otu1008	0	0	0	0	0	0	0	0	0	0
Otu1015	0.169776	-0.113393	0.218642	-0.173849	-0.213317	-0.0400948	0.0781655	0.163512	-0.101693	0.296326
Otu1039	0.0177045	-0.315018	0.377289	-0.150183	-0.260073	0.221612	0.0870096	0.360806	-0.0549702	0.0909646
Otu1070	0	0	0	0	0	0	0	0	0	0
Otu1079	0	0	0	0	0	0	0	0	0	0
Otu1081	0	0	0	0	0	0	0	0	0	0
Otu1094	0.396931	-0.315131	0.411682	-0.470014	-0.481413	0.0885049	-0.0616946	0.0120688	-0.0603719	0.31379
Otu1102	-0.125038	0.510548	-0.444207	0.32834	0.559463	-0.118313	0.141263	-0.354632	0.495948	-0.0531948
Otu1104	0.114728	-0.454584	0.381912	-0.295943	-0.393354	0.258216	-0.124488	0.503753	-0.175574	0.474375
Otu1106	0.137277	-0.277792	0.282325	-0.174834	-0.229227	-0.0200735	-0.0819255	0.202678	-0.0774157	0.214334
Otu1130	0.0250305	-0.0622711	0.111111	-0.14591	-0.151404	-0.149573	-0.248206	0.143468	-0.157581	0.201465
Otu1133	0.351569	-0.431711	0.459686	-0.54134	-0.457418	-0.195064	-0.248782	0.166334	-0.12632	0.32057
Otu1134	0.14699	-0.319882	0.403413	-0.290743	-0.332185	0.0977776	-0.0155432	0.289448	-0.192082	0.183252
Otu1137	0.389127	-0.486866	0.50336	-0.481368	-0.401344	0.0439829	0.131663	0.317654	-0.239572	0.114233
Otu1145	-0.179021	0.325859	-0.183044	0.238695	0.197124	-0.219251	-0.0439239	-0.221933	0.171389	-0.115325
Otu1148	0	0	0	0	0	0	0	0	0	0
Otu1166	0.192318	-0.382045	0.399528	-0.255776	-0.344488	-0.0984251	-0.106212	0.376865	-0.142199	0.123031
Otu1180	0.136142	-0.612943	0.572039	-0.450549	-0.470696	0.323565	0.0134331	0.413919	-0.370438	0.216728
Otu1184	0	0	0	0	0	0	0	0	0	0
Only the part selected for plotting:
	body weight (g)	lean mass	fat mass	Gastrocnemius muscle mass (g)	Sciatic response amplitude (mV)	Triceps muscle mass (g)	Radial response amplitude (mV)	Heart muscle mass	B12 total (pmol/L)	folate level (nmol/L)	Tax	Categories	Cat Numbers
Otu0914	0.0907274	0.178431	-0.250257	0.109629	0.236647	-0.0415834	0.246514	-0.154237	0.249615	-0.37047	Bacteria(100)-Firmicutes(100)-Clostridia(100)-Clostridiales(100)-Lachnospiraceae(100)-Lactonifactor(100)-	Cat 9	9		Bacteria(100)	Firmicutes(100)	Clostridia(100)	Clostridiales(100)	Lachnospiraceae(100)	Lactonifactor(100)
Otu0177	0.196917	-0.344986	0.430163	-0.197222	-0.250954	-0.0906732	0.127023	-0.149901	-0.279169	0.277515	Bacteria(100)-Firmicutes(100)-Negativicutes(100)-Selenomonadales(100)-Veillonellaceae(100)-Anaerosinus(100)-	Cat 10	10		Bacteria(100)	Firmicutes(100)	Negativicutes(100)	Selenomonadales(100)	Veillonellaceae(100)	Anaerosinus(100)
Otu0499	0.221457	-0.418307	0.444856	-0.229227	-0.347078	0.0524502	-0.0683252	0.483708	-0.108188	0.505076	Bacteria(100)-Firmicutes(100)-Clostridia(100)-Clostridiales(100)-Lachnospiraceae(100)-Lachnospiracea_incertae_sedis(100)-	Cat 10	10		Bacteria(100)	Firmicutes(100)	Clostridia(100)	Clostridiales(100)	Lachnospiraceae(100)	Lachnospiracea_incertae_sedis(100)
Otu0550	0	-0.232089	0.298226	0	0	0	0.323995	0.296388	0.230664	0.221679	Bacteria(100)-Elusimicrobia(100)-Elusimicrobia(100)-Elusimicrobiales(100)-Elusimicrobiaceae(100)-Elusimicrobium(100)-	Cat 10	10		Bacteria(100)	Elusimicrobia(100)	Elusimicrobia(100)	Elusimicrobiales(100)	Elusimicrobiaceae(100)	Elusimicrobium(100)
Otu0630	0.0796466	-0.117851	0.206563	-0.134687	-0.182604	-0.109433	-0.200442	0.107491	-0.117905	0.0932449	Bacteria(100)-Firmicutes(100)-Clostridia(100)-Clostridiales(100)-Lachnospiraceae(100)-Clostridium_XlVb(100)-	Cat 10	10		Bacteria(100)	Firmicutes(100)	Clostridia(100)	Clostridiales(100)	Lachnospiraceae(100)	Clostridium_XlVb(100)
Otu0782	0.110261	-0.101803	0.155054	-0.0895868	-0.0711056	-0.191077	-0.0411974	0.172282	-0.123943	0.181993	Bacteria(100)-Firmicutes(100)-Clostridia(100)-Clostridiales(100)-Lachnospiraceae(100)-Acetitomaculum(100)-	Cat 10	10		Bacteria(100)	Firmicutes(100)	Clostridia(100)	Clostridiales(100)	Lachnospiraceae(100)	Acetitomaculum(100)
Otu0809	0.222064	-0.436139	0.466813	-0.307694	-0.370638	-0.102884	-0.16138	0.216632	-0.394623	0.210241	Bacteria(100)-Firmicutes(100)-Clostridia(100)-Clostridiales(100)-Lachnospiraceae(100)-Lachnobacterium(100)-	Cat 10	10		Bacteria(100)	Firmicutes(100)	Clostridia(100)	Clostridiales(100)	Lachnospiraceae(100)	Lachnobacterium(100)
Otu0892	0.104295	-0.130211	0.249045	-0.0897573	-0.180779	-0.0176986	-0.146984	0.149174	0.0423697	0.275593	Bacteria(100)-Firmicutes(100)-Clostridia(100)-Clostridiales(100)-Clostridiales_Incertae_Sedis_XIII(100)-Anaerovorax(100)-	Cat 10	10		Bacteria(100)	Firmicutes(100)	Clostridia(100)	Clostridiales(100)	Clostridiales_Incertae_Sedis_XIII(100)	Anaerovorax(100)
Otu1015	0.169776	-0.113393	0.218642	-0.173849	-0.213317	-0.0400948	0.0781655	0.163512	-0.101693	0.296326	Bacteria(100)-Firmicutes(100)-Clostridia(100)-Clostridiales(100)-Lachnospiraceae(100)-Syntrophococcus(100)-	Cat 10	10		Bacteria(100)	Firmicutes(100)	Clostridia(100)	Clostridiales(100)	Lachnospiraceae(100)	Syntrophococcus(100)
Otu1166	0.192318	-0.382045	0.399528	-0.255776	-0.344488	-0.0984251	-0.106212	0.376865	-0.142199	0.123031	Bacteria(100)-Firmicutes(100)-Clostridia(100)-Clostridiales(100)-Lachnospiraceae(100)-Parasporobacterium(100)-	Cat 10	10		Bacteria(100)	Firmicutes(100)	Clostridia(100)	Clostridiales(100)	Lachnospiraceae(100)	Parasporobacterium(100)
Otu0319	0.255189	-0.366911	0.235043	-0.412088	-0.326618	0.0573871	-0.222867	0.106838	-0.347534	0.181929	Bacteria(100)-Firmicutes(100)-Clostridia(100)-Clostridiales(100)-Ruminococcaceae(100)-Ruminococcus(100)-	Cat 13	13		Bacteria(100)	Firmicutes(100)	Clostridia(100)	Clostridiales(100)	Ruminococcaceae(100)	Ruminococcus(100)
Otu0557	0	0	0	-0.504835	0	0	0	0	0	0	Bacteria(100)-Firmicutes(100)-Clostridia(100)-Clostridiales(100)-Ruminococcaceae(100)-Clostridium_IV(100)-	Cat 13	13		Bacteria(100)	Firmicutes(100)	Clostridia(100)	Clostridiales(100)	Ruminococcaceae(100)	Clostridium_IV(100)
Otu0420	0.213065	-0.562882	0.502442	-0.495116	-0.484127	0.270452	-0.193253	0.423077	-0.423882	0.163614	Bacteria(100)-Firmicutes(100)-Clostridia(100)-Clostridiales(100)-Lachnospiraceae(100)-Clostridium_XlVb(100)-	Cat 14	14		Bacteria(100)	Firmicutes(100)	Clostridia(100)	Clostridiales(100)	Lachnospiraceae(100)	Clostridium_XlVb(100)
Otu0005	-0.0982906	-0.224054	0.235653	-0.179487	-0.313797	0.195971	-0.145321	0.242369	-0.356696	0.202076	Bacteria(100)-Firmicutes(100)-Clostridia(100)-Clostridiales(100)-unclassified-unclassified-	Cat 15	15		Bacteria(100)	Firmicutes(100)	Clostridia(100)	Clostridiales(100)	unclassified	unclassified
Otu0018	0.254579	-0.478632	0.547619	-0.411477	-0.509768	0.229548	-0.0109907	0.36569	-0.192701	0.28022	Bacteria(100)-Firmicutes(100)-Clostridia(100)-Clostridiales(100)-Ruminococcaceae(100)-Pseudoflavonifractor(62)-	Cat 15	15		Bacteria(100)	Firmicutes(100)	Clostridia(100)	Clostridiales(100)	Ruminococcaceae(100)	Pseudoflavonifractor(62)
Otu0055	0.352259	-0.327228	0.403541	-0.300366	-0.37851	-0.218559	-0.234163	-0.0164835	-0.10597	0.5	Bacteria(100)-Firmicutes(100)-Clostridia(100)-Clostridiales(100)-Clostridiales_Incertae_Sedis_XII(100)-Acidaminobacter(100)-	Cat 15	15		Bacteria(100)	Firmicutes(100)	Clostridia(100)	Clostridiales(100)	Clostridiales_Incertae_Sedis_XII(100)	Acidaminobacter(100)
Otu0126	0.466799	-0.481148	0.496718	-0.51931	-0.376431	-0.191726	-0.0748092	0.184399	-0.357666	0.163944	Bacteria(100)-Firmicutes(100)-Clostridia(100)-Clostridiales(100)-Lachnospiraceae(100)-Clostridium_XlVa(100)-	Cat 15	15		Bacteria(100)	Firmicutes(100)	Clostridia(100)	Clostridiales(100)	Lachnospiraceae(100)	Clostridium_XlVa(100)
Otu0143	0.296885	-0.270617	0.34942	-0.495419	-0.483812	-0.163714	-0.113945	0.0995724	-0.294576	0.256567	Bacteria(100)-Firmicutes(100)-Clostridia(100)-Clostridiales(100)-Lachnospiraceae(100)-unclassified-	Cat 15	15		Bacteria(100)	Firmicutes(100)	Clostridia(100)	Clostridiales(100)	Lachnospiraceae(100)	unclassified
Otu0207	0.285104	-0.543346	0.52442	-0.396215	-0.379731	-0.107448	0.130362	0.131868	-0.427852	0.354701	Bacteria(100)-Firmicutes(100)-Clostridia(100)-Clostridiales(100)-Ruminococcaceae(100)-Hydrogenoanaerobacterium(100)-	Cat 15	15		Bacteria(100)	Firmicutes(100)	Clostridia(100)	Clostridiales(100)	Ruminococcaceae(100)	Hydrogenoanaerobacterium(100)
Otu0212	0	-0.483034	0.553232	-0.345422	-0.426134	0	0	0.335217	0	0.367069	Bacteria(100)-Firmicutes(100)-Clostridia(100)-Clostridiales(100)-Ruminococcaceae(100)-Faecalibacterium(100)-	Cat 15	15		Bacteria(100)	Firmicutes(100)	Clostridia(100)	Clostridiales(100)	Ruminococcaceae(100)	Faecalibacterium(100)
Otu0214	0.0733048	-0.23091	0.30788	-0.111179	-0.142334	0.0806353	0.216588	0.187538	-0.0449198	0.290165	Bacteria(100)-Firmicutes(100)-Clostridia(100)-Clostridiales(100)-Ruminococcaceae(100)-Flavonifractor(57)-	Cat 15	15		Bacteria(100)	Firmicutes(100)	Clostridia(100)	Clostridiales(100)	Ruminococcaceae(100)	Flavonifractor(57)
Otu0245	0.0653635	-0.324985	0.308491	-0.235186	-0.343311	0.271228	0.127692	0.416616	-0.213293	0.152108	Bacteria(100)-Firmicutes(100)-Clostridia(100)-Clostridiales(100)-Ruminococcaceae(100)-Oscillibacter(100)-	Cat 15	15		Bacteria(100)	Firmicutes(100)	Clostridia(100)	Clostridiales(100)	Ruminococcaceae(100)	Oscillibacter(100)
Otu0274	0.255551	-0.614555	0.544971	-0.313435	-0.325751	0.133626	0.0988488	0.480929	-0.151245	0.268483	Bacteria(100)-Firmicutes(100)-Clostridia(100)-Clostridiales(100)-Lachnospiraceae(100)-Johnsonella(100)-	Cat 15	15		Bacteria(100)	Firmicutes(100)	Clostridia(100)	Clostridiales(100)	Lachnospiraceae(100)	Johnsonella(100)
Otu0349	-0.113623	-0.287111	0.361637	-0.0861332	-0.194258	0.115455	0.027188	0.138668	-0.173262	0.120342	Bacteria(100)-Firmicutes(100)-Clostridia(100)-Clostridiales(100)-Lachnospiraceae(100)-Clostridium_XlVa(100)-	Cat 15	15		Bacteria(100)	Firmicutes(100)	Clostridia(100)	Clostridiales(100)	Lachnospiraceae(100)	Clostridium_XlVa(100)
Otu0371	0.246174	-0.458667	0.48255	-0.432335	-0.428661	0.088794	-0.0226613	0.227803	-0.155308	0.138396	Bacteria(100)-Proteobacteria(100)-Alphaproteobacteria(100)-Rhizobiales(100)-Hyphomicrobiaceae(100)-Gemmiger(100)-	Cat 15	15		Bacteria(100)	Proteobacteria(100)	Alphaproteobacteria(100)	Rhizobiales(100)	Hyphomicrobiaceae(100)	Gemmiger(100)
Otu0423	0.0670983	-0.196502	0.21152	-0.197141	-0.226856	-0.256891	-0.19078	0.120138	-0.139692	-0.0383419	Bacteria(100)-Firmicutes(100)-Clostridia(100)-Clostridiales(100)-Clostridiaceae_1(100)-Anaerosporobacter(100)-	Cat 15	15		Bacteria(100)	Firmicutes(100)	Clostridia(100)	Clostridiales(100)	Clostridiaceae_1(100)	Anaerosporobacter(100)
Otu0426	0.327228	-0.437118	0.471306	-0.39072	-0.364469	-0.186813	0.191726	0.227106	-0.186593	0.423077	Bacteria(100)-Firmicutes(100)-Clostridia(100)-Clostridiales(100)-Ruminococcaceae(100)-Pseudoflavonifractor(100)-	Cat 15	15		Bacteria(100)	Firmicutes(100)	Clostridia(100)	Clostridiales(100)	Ruminococcaceae(100)	Pseudoflavonifractor(100)
Otu0435	0.116118	-0.494737	0.442105	-0.444079	-0.50329	0.189474	-0.161044	0.426645	-0.37583	0.383224	Bacteria(100)-Firmicutes(100)-Clostridia(100)-Clostridiales(100)-Lachnospiraceae(100)-Clostridium_XlVa(100)-	Cat 15	15		Bacteria(100)	Firmicutes(100)	Clostridia(100)	Clostridiales(100)	Lachnospiraceae(100)	Clostridium_XlVa(100)
Otu0486	0.100574	-0.369441	0.338598	-0.128734	-0.265515	0.0717426	-0.156248	0.235342	-0.322989	-0.17701	Bacteria(100)-Firmicutes(100)-Clostridia(100)-Clostridiales(100)-Ruminococcaceae(100)-Ruminococcus(100)-	Cat 15	15		Bacteria(100)	Firmicutes(100)	Clostridia(100)	Clostridiales(100)	Ruminococcaceae(100)	Ruminococcus(100)
Otu0538	-0.297664	-0.193253	0.151427	0.072966	-0.203938	0.433216	-0.243359	0.371241	-0.147831	0.140437	Bacteria(100)-Firmicutes(100)-Clostridia(100)-Clostridiales(100)-Lachnospiraceae(100)-Marvinbryantia(100)-	Cat 15	15		Bacteria(100)	Firmicutes(100)	Clostridia(100)	Clostridiales(100)	Lachnospiraceae(100)	Marvinbryantia(100)
Otu0558	0.195462	-0.433212	0.456392	-0.408779	-0.386539	0.0955384	-0.11341	0.230858	-0.339552	0.084575	Bacteria(100)-Firmicutes(100)-Clostridia(100)-Clostridiales(100)-Lachnospiraceae(100)-Clostridium_XlVa(100)-	Cat 15	15		Bacteria(100)	Firmicutes(100)	Clostridia(100)	Clostridiales(100)	Lachnospiraceae(100)	Clostridium_XlVa(100)
Otu0599	0.439071	-0.426824	0.536439	-0.618496	-0.533377	-0.207594	-0.136886	0.107165	-0.302038	0.172689	Bacteria(100)-Firmicutes(100)-Clostridia(100)-Clostridiales(100)-Lachnospiraceae(100)-Clostridium_XlVa(100)-	Cat 15	15		Bacteria(100)	Firmicutes(100)	Clostridia(100)	Clostridiales(100)	Lachnospiraceae(100)	Clostridium_XlVa(100)
Otu0616	0.514797	-0.474156	0.518492	-0.448908	-0.57145	0	0	0.252472	0	0.484008	Bacteria(100)-Firmicutes(100)-Clostridia(100)-Clostridiales(100)-Lachnospiraceae(100)-Lactonifactor(100)-	Cat 15	15		Bacteria(100)	Firmicutes(100)	Clostridia(100)	Clostridiales(100)	Lachnospiraceae(100)	Lactonifactor(100)
Otu0648	0.0958548	-0.272867	0.307055	-0.120138	-0.307694	0.137711	-0.0370695	0.319835	-0.0551417	0.242832	Bacteria(100)-Firmicutes(100)-Clostridia(100)-Clostridiales(100)-Lachnospiraceae(100)-Clostridium_XlVa(100)-	Cat 15	15		Bacteria(100)	Firmicutes(100)	Clostridia(100)	Clostridiales(100)	Lachnospiraceae(100)	Clostridium_XlVa(100)
Otu0649	0.283215	-0.38537	0.398756	-0.164857	-0.200082	-0.0366348	0.279735	0.193037	-0.288984	0.140903	Bacteria(100)-Firmicutes(100)-Clostridia(100)-Clostridiales(100)-Ruminococcaceae(100)-Acetivibrio(100)-	Cat 15	15		Bacteria(100)	Firmicutes(100)	Clostridia(100)	Clostridiales(100)	Ruminococcaceae(100)	Acetivibrio(100)
Otu0705	0.322506	-0.580645	0.596737	-0.480072	-0.514267	-0.12337	-0.0774536	0.308426	-0.160992	0.372793	Bacteria(100)-Proteobacteria(100)-Alphaproteobacteria(100)-Rhodospirillales(100)-Rhodospirillaceae(100)-Dongia(100)-	Cat 15	15		Bacteria(100)	Proteobacteria(100)	Alphaproteobacteria(100)	Rhodospirillales(100)	Rhodospirillaceae(100)	Dongia(100)
Otu0730	-0.0977311	-0.187944	0.218955	-0.0964781	-0.35866	0.0447934	-0.305613	0.454199	0.059543	0.118405	Bacteria(100)-Firmicutes(100)-Clostridia(100)-Clostridiales(100)-Ruminococcaceae(100)-Anaerofilum(100)-	Cat 15	15		Bacteria(100)	Firmicutes(100)	Clostridia(100)	Clostridiales(100)	Ruminococcaceae(100)	Anaerofilum(100)
Otu0733	0.474695	-0.517254	0.591459	-0.524893	-0.591459	-0.259718	-0.313601	0.266993	-0.307329	0.154594	Bacteria(100)-Firmicutes(100)-Clostridia(100)-Clostridiales(100)-Lachnospiraceae(100)-Parasporobacterium(100)-	Cat 15	15		Bacteria(100)	Firmicutes(100)	Clostridia(100)	Clostridiales(100)	Lachnospiraceae(100)	Parasporobacterium(100)
Otu0834	0.302961	-0.583553	0.623684	-0.515132	-0.614474	-0.0717105	-0.174862	0.349671	-0.442308	0.340132	Bacteria(100)-Firmicutes(100)-Clostridia(100)-Clostridiales(100)-Lachnospiraceae(100)-Coprococcus(100)-	Cat 15	15		Bacteria(100)	Firmicutes(100)	Clostridia(100)	Clostridiales(100)	Lachnospiraceae(100)	Coprococcus(100)
Otu0954	0.457445	-0.690722	0.683197	-0.712901	-0.702603	-0.180205	-0.236085	0.396848	-0.461815	0.306547	Bacteria(100)-Proteobacteria(100)-Betaproteobacteria(100)-Burkholderiales(100)-Sutterellaceae(100)-Sutterella(100)-	Cat 15	15		Bacteria(100)	Proteobacteria(100)	Betaproteobacteria(100)	Burkholderiales(100)	Sutterellaceae(100)	Sutterella(100)
Otu0962	0.445733	-0.424668	0.491528	-0.411235	-0.373073	-0.0268661	-0.0647328	0.202107	-0.215944	0.579759	Bacteria(100)-Firmicutes(100)-Clostridia(100)-Clostridiales(100)-Ruminococcaceae(100)-Clostridium_IV(100)-	Cat 15	15		Bacteria(100)	Firmicutes(100)	Clostridia(100)	Clostridiales(100)	Ruminococcaceae(100)	Clostridium_IV(100)
Otu0979	0.421951	-0.592187	0.544172	-0.614012	-0.529258	-0.209884	-0.148433	0.316463	-0.310422	0.239712	Bacteria(100)-Firmicutes(100)-Clostridia(100)-Clostridiales(100)-Ruminococcaceae(100)-Butyricicoccus(100)-	Cat 15	15		Bacteria(100)	Firmicutes(100)	Clostridia(100)	Clostridiales(100)	Ruminococcaceae(100)	Butyricicoccus(100)
Otu1039	0.0177045	-0.315018	0.377289	-0.150183	-0.260073	0.221612	0.0870096	0.360806	-0.0549702	0.0909646	Bacteria(100)-Firmicutes(100)-Clostridia(100)-Clostridiales(100)-Ruminococcaceae(100)-Hydrogenoanaerobacterium(100)-	Cat 15	15		Bacteria(100)	Firmicutes(100)	Clostridia(100)	Clostridiales(100)	Ruminococcaceae(100)	Hydrogenoanaerobacterium(100)
Otu1094	0.396931	-0.315131	0.411682	-0.470014	-0.481413	0.0885049	-0.0616946	0.0120688	-0.0603719	0.31379	Bacteria(100)-Firmicutes(100)-Clostridia(100)-Clostridiales(100)-Lachnospiraceae(100)-Syntrophococcus(100)-	Cat 15	15		Bacteria(100)	Firmicutes(100)	Clostridia(100)	Clostridiales(100)	Lachnospiraceae(100)	Syntrophococcus(100)
Otu1104	0.114728	-0.454584	0.381912	-0.295943	-0.393354	0.258216	-0.124488	0.503753	-0.175574	0.474375	Bacteria(100)-Proteobacteria(100)-Alphaproteobacteria(100)-Rhodospirillales(100)-Rhodospirillaceae(100)-Insolitispirillum(100)-	Cat 15	15		Bacteria(100)	Proteobacteria(100)	Alphaproteobacteria(100)	Rhodospirillales(100)	Rhodospirillaceae(100)	Insolitispirillum(100)
Otu1106	0.137277	-0.277792	0.282325	-0.174834	-0.229227	-0.0200735	-0.0819255	0.202678	-0.0774157	0.214334	Bacteria(100)-Bacteroidetes(100)-Bacteroidia(100)-Bacteroidales(100)-Porphyromonadaceae(100)-Tannerella(100)-	Cat 15	15		Bacteria(100)	Bacteroidetes(100)	Bacteroidia(100)	Bacteroidales(100)	Porphyromonadaceae(100)	Tannerella(100)
Otu1130	0.0250305	-0.0622711	0.111111	-0.14591	-0.151404	-0.149573	-0.248206	0.143468	-0.157581	0.201465	Bacteria(100)-Actinobacteria(100)-Actinobacteria(100)-Coriobacteriales(100)-Coriobacteriaceae(100)-Gordonibacter(100)-	Cat 15	15		Bacteria(100)	Actinobacteria(100)	Actinobacteria(100)	Coriobacteriales(100)	Coriobacteriaceae(100)	Gordonibacter(100)
Otu1133	0.351569	-0.431711	0.459686	-0.54134	-0.457418	-0.195064	-0.248782	0.166334	-0.12632	0.32057	Bacteria(100)-Firmicutes(100)-Clostridia(100)-Clostridiales(100)-Ruminococcaceae(100)-Oscillibacter(100)-	Cat 15	15		Bacteria(100)	Firmicutes(100)	Clostridia(100)	Clostridiales(100)	Ruminococcaceae(100)	Oscillibacter(100)
Otu1134	0.14699	-0.319882	0.403413	-0.290743	-0.332185	0.0977776	-0.0155432	0.289448	-0.192082	0.183252	Bacteria(100)-Firmicutes(100)-Clostridia(100)-Clostridiales(100)-Ruminococcaceae(100)-Ruminococcus(100)-	Cat 15	15		Bacteria(100)	Firmicutes(100)	Clostridia(100)	Clostridiales(100)	Ruminococcaceae(100)	Ruminococcus(100)
Otu1137	0.389127	-0.486866	0.50336	-0.481368	-0.401344	0.0439829	0.131663	0.317654	-0.239572	0.114233	Bacteria(100)-Firmicutes(100)-Clostridia(100)-Clostridiales(100)-Ruminococcaceae(100)-Papillibacter(100)-	Cat 15	15		Bacteria(100)	Firmicutes(100)	Clostridia(100)	Clostridiales(100)	Ruminococcaceae(100)	Papillibacter(100)
Otu1180	0.136142	-0.612943	0.572039	-0.450549	-0.470696	0.323565	0.0134331	0.413919	-0.370438	0.216728	Bacteria(100)-Proteobacteria(100)-Deltaproteobacteria(100)-Bdellovibrionales(100)-Bdellovibrionaceae(100)-Vampirovibrio(100)-	Cat 15	15		Bacteria(100)	Proteobacteria(100)	Deltaproteobacteria(100)	Bdellovibrionales(100)	Bdellovibrionaceae(100)	Vampirovibrio(100)
Otu0728	-0.211096	0.278439	-0.157351	0.322472	0.280382	-0.0997202	0.0929353	-0.118499	0.208925	0.0459749	Bacteria(100)-Firmicutes(100)-Clostridia(100)-Clostridiales(100)-Lachnospiraceae(100)-Lachnospiracea_incertae_sedis(100)-	Cat 16	16		Bacteria(100)	Firmicutes(100)	Clostridia(100)	Clostridiales(100)	Lachnospiraceae(100)	Lachnospiracea_incertae_sedis(100)
Otu0929	-0.0990727	-0.0226637	0.077704	0.086122	-0.0446798	0.110081	0.0981163	0.248005	0.0482634	0.119794	Bacteria(100)-Firmicutes(100)-Clostridia(100)-Clostridiales(100)-Ruminococcaceae(100)-Oscillibacter(100)-	Cat 16	16		Bacteria(100)	Firmicutes(100)	Clostridia(100)	Clostridiales(100)	Ruminococcaceae(100)	Oscillibacter(100)
Otu1145	-0.179021	0.325859	-0.183044	0.238695	0.197124	-0.219251	-0.0439239	-0.221933	0.171389	-0.115325	Bacteria(100)-Firmicutes(100)-Clostridia(100)-Clostridiales(100)-Ruminococcaceae(100)-Clostridium_III(100)-	Cat 16	16		Bacteria(100)	Firmicutes(100)	Clostridia(100)	Clostridiales(100)	Ruminococcaceae(100)	Clostridium_III(100)
Otu0128	-0.136142	0.460928	-0.516484	0.200855	0.375458	-0.030525	0.176156	-0.213675	0.223546	-0.309524	Bacteria(100)-Bacteroidetes(100)-Bacteroidia(100)-Bacteroidales(100)-Porphyromonadaceae(100)-Barnesiella(100)-	Cat 18	18		Bacteria(100)	Bacteroidetes(100)	Bacteroidia(100)	Bacteroidales(100)	Porphyromonadaceae(100)	Barnesiella(100)
Otu0178	-0.225885	0.19536	-0.31685	0.15812	0.391941	0.235653	0.207907	-0.101343	-0.119713	-0.391941	Bacteria(100)-Firmicutes(100)-Clostridia(100)-Clostridiales(100)-Ruminococcaceae(100)-Ruminococcus(100)-	Cat 18	18		Bacteria(100)	Firmicutes(100)	Clostridia(100)	Clostridiales(100)	Ruminococcaceae(100)	Ruminococcus(100)
Otu0269	-0.287546	0.526862	-0.498168	0.383394	0.567766	0	0	-0.2558	0.447091	-0.224664	Bacteria(100)-Firmicutes(100)-Clostridia(100)-Clostridiales(100)-Ruminococcaceae(100)-Papillibacter(100)-	Cat 18	18		Bacteria(100)	Firmicutes(100)	Clostridia(100)	Clostridiales(100)	Ruminococcaceae(100)	Papillibacter(100)
Otu0299	0	0.529702	-0.49296	0.50337	0.548686	0	0	0	0.423037	-0.453156	Bacteria(100)-Firmicutes(100)-Clostridia(100)-Clostridiales(100)-Lachnospiraceae(100)-Clostridium_XlVa(100)-	Cat 18	18		Bacteria(100)	Firmicutes(100)	Clostridia(100)	Clostridiales(100)	Lachnospiraceae(100)	Clostridium_XlVa(100)
Otu0502	-0.163004	0.315629	-0.357753	0.32967	0.368132	0.159951	-0.0607541	-0.105617	0.349366	-0.147131	Bacteria(100)-Firmicutes(100)-Clostridia(100)-Clostridiales(100)-Lachnospiraceae(100)-Lactonifactor(100)-	Cat 18	18		Bacteria(100)	Firmicutes(100)	Clostridia(100)	Clostridiales(100)	Lachnospiraceae(100)	Lactonifactor(100)
Otu0575	-0.327652	0.485003	-0.560117	0.354848	0.604796	0.198145	0.0650871	-0.167064	0.330393	-0.169006	Bacteria(100)-Firmicutes(100)-Clostridia(100)-Clostridiales(100)-Lachnospiraceae(100)-Butyrivibrio(100)-	Cat 18	18		Bacteria(100)	Firmicutes(100)	Clostridia(100)	Clostridiales(100)	Lachnospiraceae(100)	Butyrivibrio(100)
Otu0725	-0.13891	0.116318	-0.171577	0.122424	0.332163	0.2824	0.185344	-0.124866	-0.182498	-0.0928103	Bacteria(100)-Firmicutes(100)-Clostridia(100)-Clostridiales(100)-Lachnospiraceae(100)-Butyrivibrio(100)-	Cat 18	18		Bacteria(100)	Firmicutes(100)	Clostridia(100)	Clostridiales(100)	Lachnospiraceae(100)	Butyrivibrio(100)
Otu0761	0	0.444444	-0.398657	0	0	0	0	-0.430403	0	0	Bacteria(100)-Firmicutes(100)-Clostridia(100)-Clostridiales(100)-Lachnospiraceae(100)-Anaerostipes(100)-	Cat 18	18		Bacteria(100)	Firmicutes(100)	Clostridia(100)	Clostridiales(100)	Lachnospiraceae(100)	Anaerostipes(100)
Otu0875	-0.151404	0.419414	-0.363248	0.421245	0.465201	-0.046398	0.2363	-0.387668	0.30936	-0.362637	Bacteria(100)-Bacteroidetes(100)-Bacteroidia(100)-Bacteroidales(100)-Porphyromonadaceae(100)-Barnesiella(100)-	Cat 18	18		Bacteria(100)	Bacteroidetes(100)	Bacteroidia(100)	Bacteroidales(100)	Porphyromonadaceae(100)	Barnesiella(100)
Otu0922	0	0	-0.442002	0	0.431624	0	0	0	0	0	Bacteria(100)-Firmicutes(100)-Clostridia(100)-Clostridiales(100)-Ruminococcaceae(100)-Sporobacter(100)-	Cat 18	18		Bacteria(100)	Firmicutes(100)	Clostridia(100)	Clostridiales(100)	Ruminococcaceae(100)	Sporobacter(100)
Otu0959	0	0.519215	-0.463861	0	0.433865	0	0	0	0.501199	0	Bacteria(100)-Actinobacteria(100)-Actinobacteria(100)-Coriobacteriales(100)-Coriobacteriaceae(100)-Adlercreutzia(100)-	Cat 18	18		Bacteria(100)	Actinobacteria(100)	Actinobacteria(100)	Coriobacteriales(100)	Coriobacteriaceae(100)	Adlercreutzia(100)
Otu1102	-0.125038	0.510548	-0.444207	0.32834	0.559463	-0.118313	0.141263	-0.354632	0.495948	-0.0531948	Bacteria(100)-Firmicutes(100)-Clostridia(100)-Clostridiales(100)-Gracilibacteraceae(100)-Lutispora(100)-	Cat 18	18		Bacteria(100)	Firmicutes(100)	Clostridia(100)	Clostridiales(100)	Gracilibacteraceae(100)	Lutispora(100)

[truncated: 1 more sheets: MFC_Metadata_Correlation]
